# Supplementary material for: OptoRibo-seq for spatiotemporally resolved mapping of local protein translatome
Source: Research Square preprint supplement (doi:10.21203/rs.3.rs-3982122/v1), 2024-03-05
Supplement: Supplementary file 1 [file 0e28c51ef12b8f4dc047f755.xlsx]

## Sheet: OMM-proximal translatome
Ensemble Gene ID	Gene name	Gene type	UniprotID	Log2 (OMM E/I)	P-adj (OMM E/I)	Log2 (Enrich O/N)	P-adj (Enrich O/N)	MitoCarta	CAP-seq OMM	APEX-seq OMM
ENSG00000001461	NIPAL3	protein_coding	Q6P499	0.752107	2.64574e-05	0.588218	0.00517766	0	0	1
ENSG00000001629	ANKIB1	protein_coding	Q9P2G1	0.596043	5.93881e-05	0.891038	3.3098e-07	0	0	0
ENSG00000002016	RAD52	protein_coding	P43351	0.723367	4.8509e-09	1.02707	4.60698e-21	0	0	0
ENSG00000002822	MAD1L1	protein_coding	Q9Y6D9	0.530188	2.7947e-08	0.453772	9.52983e-08	0	0	0
ENSG00000002919	SNX11	protein_coding	Q9Y5W9	0.603511	1.87388e-07	0.379348	0.000478811	0	0	0
ENSG00000003756	RBM5	protein_coding	P52756	0.425923	3.51161e-06	0.69224	9.38212e-07	0	0	0
ENSG00000004660	CAMKK1	protein_coding	Q8N5S9	0.505932	1.69723e-06	0.806997	6.75919e-14	0	0	0
ENSG00000006194	ZNF263	protein_coding	O14978	0.424555	0.00165924	0.595574	1.28549e-06	0	0	0
ENSG00000006453	BAIAP2L1	protein_coding	Q9UHR4	0.582399	0.000297334	0.549645	0.00650568	0	0	0
ENSG00000007202	KIAA0100	protein_coding	Q14667	1.04816	3.67745e-14	1.37227	2.37442e-10	1	0	1
ENSG00000007376	RPUSD1	protein_coding	Q9UJJ7	0.765514	2.67217e-06	0.434786	8.56948e-05	0	0	0
ENSG00000008083	JARID2	protein_coding	Q92833	0.361895	0.00422904	0.695386	8.2066e-08	0	0	0
ENSG00000008130	NADK	protein_coding	O95544	0.751168	7.12425e-23	1.11158	1.61614e-36	0	0	0
ENSG00000008300	CELSR3	protein_coding	Q9NYQ7	1.21643	9.41966e-37	1.53926	1.39459e-48	0	0	1
ENSG00000008710	PKD1	protein_coding	P98161	1.34502	8.28155e-62	1.81071	6.06292e-52	0	0	0
ENSG00000009413	REV3L	protein_coding	O60673	0.487475	9.52689e-06	0.790548	0.00110879	0	0	0
ENSG00000009830	POMT2	protein_coding	Q9UKY4	0.651912	1.29021e-10	1.05952	5.90024e-21	0	0	1
ENSG00000010295	IFFO1	protein_coding	Q0D2I5	1.88857	4.1778e-91	1.42379	2.37133e-32	0	0	0
ENSG00000010322	NISCH	protein_coding	Q9Y2I1	0.913699	1.33092e-19	1.24977	2.02541e-34	0	0	0
ENSG00000010361	FUZ	protein_coding	Q9BT04	0.382383	2.01799e-05	0.529726	1.78284e-08	0	0	0
ENSG00000010803	SCMH1	protein_coding	Q96GD3	0.404397	0.00293116	1.10985	5.05645e-24	0	0	0
ENSG00000011021	CLCN6	protein_coding	P51797	1.14537	2.62784e-31	1.01157	5.63628e-26	0	0	0
ENSG00000011243	AKAP8L	protein_coding	Q9ULX6	1.10879	5.99977e-21	0.549818	1.3699e-05	0	0	0
ENSG00000011451	WIZ	protein_coding	O95785	0.384854	6.75523e-05	0.366793	0.0229884	0	0	0
ENSG00000013306	SLC25A39	protein_coding	Q9BZJ4	0.880538	3.10521e-14	0.882316	1.04981e-08	1	0	0
ENSG00000013573	DDX11	protein_coding	Q96FC9	2.07692	6.27815e-79	1.46633	8.57282e-31	0	0	0
ENSG00000015133	CCDC88C	protein_coding	Q9P219	0.766896	7.61455e-13	0.955952	9.49793e-17	0	0	0
ENSG00000015532	XYLT2	protein_coding	Q9H1B5	0.575518	3.76058e-06	0.861358	3.80091e-10	0	0	1
ENSG00000022840	RNF10	protein_coding	Q8N5U6	0.457075	4.77603e-07	0.790415	1.68018e-14	0	0	0
ENSG00000023041	ZDHHC6	protein_coding	Q9H6R6	0.893581	3.20006e-13	0.771783	2.00833e-09	0	0	0
ENSG00000025770	NCAPH2	protein_coding	Q6IBW4	0.590341	1.53784e-10	0.34596	0.00020045	0	0	0
ENSG00000026652	AGPAT4	protein_coding	Q9NRZ5	1.138	8.68566e-44	0.582769	3.89863e-05	0	0	1
ENSG00000028310	BRD9	protein_coding	Q9H8M2	0.878977	1.09244e-26	1.03483	8.53882e-29	0	0	0
ENSG00000031823	RANBP3	protein_coding	Q9H6Z4	0.7962	2.22612e-13	0.695403	1.5988e-10	0	0	0
ENSG00000032389	TSSC1	protein_coding	#N/A	1.10069	6.90553e-43	0.592344	3.90506e-16	0	0	0
ENSG00000033100	CHPF2	protein_coding	Q9P2E5	0.48511	3.9357e-06	0.938925	2.84163e-16	0	0	0
ENSG00000037280	FLT4	protein_coding	P35916	1.43107	1.74998e-77	0.886732	3.25221e-19	0	0	0
ENSG00000037637	FBXO42	protein_coding	Q6P3S6	0.302329	0.00353858	0.323918	0.00616795	0	0	0
ENSG00000037757	MRI1	protein_coding	Q9BV20	0.787937	1.25925e-23	0.71662	3.57042e-21	0	0	0
ENSG00000037897	METTL1	protein_coding	Q9UBP6	0.73911	3.39682e-06	0.414715	0.00180849	0	0	0
ENSG00000038382	TRIO	protein_coding	O75962	0.531091	0.000239135	1.08184	2.73726e-15	0	0	0
ENSG00000039650	PNKP	protein_coding	Q96T60	0.838352	4.90678e-14	0.717573	1.08501e-14	0	0	0
ENSG00000040199	PHLPP2	protein_coding	Q6ZVD8	0.322374	0.00223246	0.637388	3.37743e-07	0	0	0
ENSG00000040531	CTNS	protein_coding	O60931	0.380018	0.00355229	0.330631	0.00130516	0	0	1
ENSG00000040933	INPP4A	protein_coding	Q96PE3	0.680094	2.61069e-06	1.00285	2.9764e-13	0	0	0
ENSG00000043355	ZIC2	protein_coding	O95409	0.824588	7.67377e-25	0.614948	3.01929e-19	0	0	0
ENSG00000044090	CUL7	protein_coding	Q14999	0.806651	6.54976e-13	0.939011	4.89356e-20	0	0	0
ENSG00000047056	WDR37	protein_coding	Q9Y2I8	0.412018	0.00326279	0.826759	9.46196e-09	0	0	0
ENSG00000048471	SNX29	protein_coding	Q8TEQ0	0.414638	0.00185784	0.468025	0.000377986	0	0	0
ENSG00000050820	BCAR1	protein_coding	P56945	0.792768	1.80508e-18	0.431083	2.05168e-07	0	0	0
ENSG00000051009	FAM160A2	protein_coding	Q8N612	0.575537	1.02063e-07	0.648577	2.95474e-08	0	0	0
ENSG00000052749	RRP12	protein_coding	Q5JTH9	0.550936	1.3778e-20	0.77109	6.30783e-07	0	0	0
ENSG00000053747	LAMA3	protein_coding	Q16787	0.353186	0.0014846	0.98653	2.79644e-27	0	0	1
ENSG00000054690	PLEKHH1	protein_coding	Q9ULM0	0.880951	8.60767e-15	1.27683	6.5779e-20	0	0	0
ENSG00000054793	ATP9A	protein_coding	O75110	0.52762	1.35109e-05	1.05245	2.37082e-20	0	0	1
ENSG00000055483	USP36	protein_coding	Q9P275	0.619341	7.40249e-11	1.0507	8.64584e-40	0	0	0
ENSG00000055609	KMT2C	protein_coding	Q8NEZ4	0.318542	0.00017995	0.882609	8.0459e-25	0	0	0
ENSG00000058600	POLR3E	protein_coding	Q9NVU0	0.51515	8.58848e-07	0.544831	1.70291e-08	0	0	0
ENSG00000059122	FLYWCH1	protein_coding	Q4VC44	1.0216	1.02866e-26	0.795085	1.59743e-15	0	0	0
ENSG00000059769	DNAJC25	protein_coding	Q9H1X3	1.35333	1.47475e-13	1.26426	9.08397e-11	0	0	0
ENSG00000060491	OGFR	protein_coding	Q9NZT2	0.47901	0.00238926	0.348838	0.0247884	0	0	0
ENSG00000060656	PTPRU	protein_coding	Q92729	1.06069	3.00015e-32	1.12257	2.84203e-26	0	0	1
ENSG00000061273	HDAC7	protein_coding	Q8WUI4	1.24129	1.4909e-24	1.30718	1.42573e-27	0	0	0
ENSG00000061938	TNK2	protein_coding	Q07912	1.64581	5.53566e-76	1.51734	2.18316e-30	0	0	0
ENSG00000062822	POLD1	protein_coding	P28340	0.781012	8.73633e-16	0.536431	1.44533e-05	0	0	0
ENSG00000063169	GLTSCR1	protein_coding	#N/A	0.783156	2.49592e-10	1.08353	1.48592e-20	0	0	0
ENSG00000063245	EPN1	protein_coding	Q9Y6I3	0.875678	1.33482e-19	0.943277	5.40655e-20	0	0	0
ENSG00000063660	GPC1	protein_coding	P35052	0.548638	6.65893e-07	0.373175	0.0200376	0	0	1
ENSG00000064393	HIPK2	protein_coding	Q9H2X6	0.395086	2.09384e-05	1.10916	3.31776e-27	0	0	0
ENSG00000064545	TMEM161A	protein_coding	Q9NX61	1.00483	1.7303e-52	0.496005	1.79936e-13	0	1	0
ENSG00000064607	SUGP2	protein_coding	Q8IX01	0.390631	2.50748e-09	0.609914	2.7744e-19	0	0	0
ENSG00000064999	ANKS1A	protein_coding	Q92625	0.362762	0.00365834	0.315613	0.000168291	0	0	0
ENSG00000065000	AP3D1	protein_coding	O14617	0.70239	5.25961e-38	1.02168	3.6439e-55	0	0	0
ENSG00000065526	SPEN	protein_coding	Q96T58	0.835936	1.02296e-10	0.952548	5.97889e-06	0	0	0
ENSG00000066933	MYO9A	protein_coding	B2RTY4	0.584108	7.47571e-14	0.893941	1.6183e-12	0	0	0
ENSG00000067606	PRKCZ	protein_coding	Q05513	1.37401	3.04619e-11	1.05687	9.83096e-07	0	0	0
ENSG00000068078	FGFR3	protein_coding	P22607	1.35273	3.26186e-26	1.34947	2.20227e-27	0	0	0
ENSG00000068120	COASY	protein_coding	Q13057	0.560277	1.36771e-07	0.341899	0.00202764	1	0	0
ENSG00000068137	PLEKHH3	protein_coding	Q7Z736	1.09872	2.04109e-21	0.903973	1.94129e-25	0	0	0
ENSG00000068323	TFE3	protein_coding	P19532	1.04581	2.42012e-18	0.597547	6.27698e-07	0	0	0
ENSG00000068400	GRIPAP1	protein_coding	Q4V328	0.413079	3.8385e-06	0.695923	1.87413e-19	0	0	0
ENSG00000068650	ATP11A	protein_coding	P98196	0.44793	0.000336713	1.13364	3.67817e-15	0	0	1
ENSG00000069011	PITX1	protein_coding	P78337	0.658427	9.11064e-11	0.97022	2.07854e-16	0	0	0
ENSG00000069956	MAPK6	protein_coding	Q16659	1.26625	3.21638e-18	0.558824	0.00136841	0	0	0
ENSG00000070159	PTPN3	protein_coding	P26045	0.664576	9.2546e-05	0.406494	0.0270296	0	0	0
ENSG00000070366	SMG6	protein_coding	Q86US8	0.414531	1.46843e-07	0.333083	0.000656457	0	0	0
ENSG00000070413	DGCR2	protein_coding	P98153	0.787517	3.53916e-29	0.885046	8.11549e-25	0	0	1
ENSG00000070423	RNF126	protein_coding	Q9BV68	0.824192	4.47075e-23	0.822592	3.92499e-19	0	0	0
ENSG00000070476	ZXDC	protein_coding	Q2QGD7	0.583496	9.5938e-12	0.681807	1.09286e-11	0	0	0
ENSG00000070610	GBA2	protein_coding	Q9HCG7	0.534125	3.06626e-10	1.01854	1.29215e-24	0	0	0
ENSG00000070614	NDST1	protein_coding	P52848	0.725139	3.35561e-19	1.18577	1.03254e-30	0	0	0
ENSG00000071189	SNX13	protein_coding	Q9Y5W8	0.412703	0.000808537	0.44334	0.000213351	0	0	1
ENSG00000071564	TCF3	protein_coding	P15923	1.02812	2.38927e-37	1.20482	1.22555e-42	0	0	0
ENSG00000071655	MBD3	protein_coding	O95983	1.64007	1.91928e-45	1.43904	4.01131e-42	0	0	0
ENSG00000071889	FAM3A	protein_coding	P98173	1.01917	7.08232e-28	0.64006	8.54383e-13	0	0	0
ENSG00000071894	CPSF1	protein_coding	Q10570	0.942338	3.78556e-27	0.534804	1.13496e-07	0	0	0
ENSG00000072071	ADGRL1	protein_coding	O94910	1.31715	2.51189e-62	1.40443	2.99369e-37	0	0	0
ENSG00000072121	ZFYVE26	protein_coding	Q68DK2	0.44635	8.45227e-06	1.18104	6.98349e-32	0	0	0
ENSG00000072310	SREBF1	protein_coding	P36956	0.586947	0.0267647	0.714914	0.00410243	0	0	0
ENSG00000072518	MARK2	protein_coding	Q7KZI7	0.372405	2.03085e-05	0.388602	0.000289599	0	0	0
ENSG00000072609	CHFR	protein_coding	Q96EP1	1.23481	2.25779e-27	0.896774	5.01291e-21	0	0	0
ENSG00000072786	STK10	protein_coding	O94804	0.646307	2.04988e-14	0.500537	3.6677e-09	0	0	0
ENSG00000073008	PVR	protein_coding	P15151	0.450128	6.02166e-08	0.418136	5.64176e-06	0	0	1
ENSG00000073169	SELENOO	protein_coding	Q9BVL4	0.977927	4.0186e-24	0.906005	1.60735e-14	1	0	0
ENSG00000073417	PDE8A	protein_coding	O60658	0.331238	0.023889	0.727766	6.19884e-09	0	0	0
ENSG00000073536	NLE1	protein_coding	Q9NVX2	0.654137	2.41222e-05	0.462793	0.00344814	0	0	0
ENSG00000073614	KDM5A	protein_coding	P29375	1.02705	3.02825e-15	0.784386	2.38724e-05	0	0	0
ENSG00000074181	NOTCH3	protein_coding	Q9UM47	0.848667	5.69779e-12	0.905541	5.84479e-16	0	0	1
ENSG00000074356	NCBP3	protein_coding	Q53F19	0.486684	1.58713e-20	0.301771	0.000573294	0	0	0
ENSG00000074755	ZZEF1	protein_coding	O43149	0.427517	1.32227e-07	1.0348	2.78502e-32	0	0	0
ENSG00000074855	ANO8	protein_coding	Q9HCE9	1.41671	2.34229e-40	1.20653	4.66873e-17	0	0	0
ENSG00000075151	EIF4G3	protein_coding	O43432	0.388627	0.0189153	0.459734	0.0441807	0	0	0
ENSG00000075275	CELSR1	protein_coding	Q9NYQ6	0.660954	1.91344e-14	1.06071	2.50044e-30	0	0	1
ENSG00000075420	FNDC3B	protein_coding	Q53EP0	0.47874	1.07332e-05	0.3128	0.0375009	0	0	0
ENSG00000075702	WDR62	protein_coding	O43379	0.870336	9.71107e-16	1.2218	8.33232e-39	0	0	0
ENSG00000076555	ACACB	protein_coding	O00763	1.009	2.14911e-18	1.4517	2.13344e-18	1	0	0
ENSG00000076924	XAB2	protein_coding	Q9HCS7	0.625058	2.29137e-11	0.318056	0.0332637	0	0	0
ENSG00000076984	MAP2K7	protein_coding	O14733	0.465476	8.23148e-05	0.7619	1.91889e-11	0	0	0
ENSG00000077044	DGKD	protein_coding	Q16760	0.984835	8.85619e-15	1.47538	3.96628e-28	0	0	0
ENSG00000077063	CTTNBP2	protein_coding	Q8WZ74	1.33171	9.47171e-36	0.802416	0.000767811	0	0	0
ENSG00000077782	FGFR1	protein_coding	P11362	0.954736	4.6794e-26	0.956568	2.17282e-12	0	0	1
ENSG00000078061	ARAF	protein_coding	P10398	0.685353	3.77339e-09	0.622486	4.87588e-08	0	0	0
ENSG00000078687	TNRC6C	protein_coding	Q9HCJ0	0.557899	6.08046e-07	0.708356	2.31926e-09	0	0	0
ENSG00000079313	REXO1	protein_coding	Q8N1G1	1.12646	5.94697e-25	1.35254	3.22369e-41	0	0	0
ENSG00000079432	CIC	protein_coding	Q96RK0	0.89459	1.02857e-11	1.35861	1.6767e-26	0	0	0
ENSG00000079805	DNM2	protein_coding	P50570	0.683992	1.2271e-11	0.491285	7.07692e-06	0	0	0
ENSG00000079999	KEAP1	protein_coding	Q14145	0.4501	1.781e-08	0.54268	6.47984e-12	0	0	0
ENSG00000080189	SLC35C2	protein_coding	Q9NQQ7	1.13141	9.05666e-28	0.907557	3.08042e-09	0	0	0
ENSG00000082014	SMARCD3	protein_coding	Q6STE5	1.2315	8.90853e-23	0.989404	4.48428e-14	0	0	0
ENSG00000084090	STARD7	protein_coding	Q9NQZ5	0.355508	0.000428371	0.541947	1.20069e-05	1	0	0
ENSG00000084092	NOA1	protein_coding	Q8NC60	0.41734	2.51985e-05	0.357197	0.00131563	1	0	0
ENSG00000084112	SSH1	protein_coding	Q8WYL5	0.676489	1.08559e-09	1.34548	1.0007e-28	0	0	0
ENSG00000084693	AGBL5	protein_coding	Q8NDL9	0.940945	6.8327e-16	0.700953	4.96992e-07	0	0	0
ENSG00000086015	MAST2	protein_coding	Q6P0Q8	0.844451	2.06451e-17	1.11213	4.81001e-25	0	0	0
ENSG00000086300	SNX10	protein_coding	Q9Y5X0	1.37912	2.22876e-49	0.790606	6.33103e-15	0	0	0
ENSG00000087074	PPP1R15A	protein_coding	O75807	1.0211	6.81655e-38	0.65823	6.31454e-09	0	1	1
ENSG00000087077	TRIP6	protein_coding	Q15654	0.798787	2.8135e-25	0.352671	4.59325e-05	0	0	0
ENSG00000087152	ATXN7L3	protein_coding	Q14CW9	0.807927	1.53668e-18	1.25681	9.12089e-29	0	0	0
ENSG00000087157	PGS1	protein_coding	Q32NB8	0.786346	1.23115e-13	0.718604	2.38439e-09	1	0	0
ENSG00000088256	GNA11	protein_coding	P29992	0.694831	8.5315e-07	0.661709	1.3674e-06	0	0	0
ENSG00000088448	ANKRD10	protein_coding	Q9NXR5	0.417224	0.00821667	0.742782	1.49992e-06	0	0	0
ENSG00000088538	DOCK3	protein_coding	Q8IZD9	0.903975	1.42217e-10	1.46888	1.13319e-19	0	0	0
ENSG00000088808	PPP1R13B	protein_coding	Q96KQ4	0.58983	7.27531e-06	0.65568	9.1205e-08	0	0	0
ENSG00000088888	MAVS	protein_coding	Q7Z434	1.49274	1.22219e-52	4.14078	3.15584e-37	1	0	0
ENSG00000089057	SLC23A2	protein_coding	Q9UGH3	0.543679	1.57334e-06	0.64477	9.66016e-08	0	0	1
ENSG00000089094	KDM2B	protein_coding	Q8NHM5	0.344971	1.95515e-05	0.604061	6.95112e-15	0	0	0
ENSG00000089154	GCN1	protein_coding	Q92616	0.522968	7.64984e-08	0.790587	1.5958e-16	0	0	0
ENSG00000089351	GRAMD1A	protein_coding	Q96CP6	0.738495	8.05444e-12	1.0879	3.47451e-54	0	0	0
ENSG00000089639	GMIP	protein_coding	Q9P107	1.18035	2.14338e-08	1.21796	4.06227e-11	0	0	0
ENSG00000090006	LTBP4	protein_coding	Q8N2S1	0.912528	6.84287e-15	0.89011	9.95825e-13	0	0	0
ENSG00000090020	SLC9A1	protein_coding	P19634	0.909548	2.96544e-16	0.699303	1.38791e-09	0	0	1
ENSG00000090372	STRN4	protein_coding	Q9NRL3	2.01385	5.52463e-63	1.40315	5.58973e-39	0	0	0
ENSG00000090615	GOLGA3	protein_coding	Q08378	1.03724	8.96753e-32	1.34582	1.55457e-37	0	0	0
ENSG00000090924	PLEKHG2	protein_coding	Q9H7P9	0.750501	5.39199e-13	1.01834	2.3668e-26	0	0	0
ENSG00000092847	AGO1	protein_coding	Q9UL18	0.631408	5.31352e-07	0.629408	1.63451e-06	0	0	0
ENSG00000095906	NUBP2	protein_coding	Q9Y5Y2	0.666119	2.86952e-06	0.470593	0.000321609	0	0	0
ENSG00000096070	BRPF3	protein_coding	Q9ULD4	0.974211	1.53688e-16	0.801782	5.31535e-08	0	0	0
ENSG00000097007	ABL1	protein_coding	P00519	0.346837	0.000358627	0.831232	1.21481e-12	0	0	0
ENSG00000099331	MYO9B	protein_coding	Q13459	0.959572	9.163e-19	0.987716	3.05261e-12	0	0	0
ENSG00000099364	FBXL19	protein_coding	Q6PCT2	1.09638	1.81317e-20	1.20024	3.64405e-31	0	0	0
ENSG00000099381	SETD1A	protein_coding	O15047	0.636438	3.03434e-11	0.928532	5.08596e-16	0	0	0
ENSG00000099814	CEP170B	protein_coding	Q9Y4F5	1.02925	7.35297e-17	1.2939	3.49404e-30	0	0	0
ENSG00000099821	POLRMT	protein_coding	O00411	0.735224	6.24126e-07	0.656086	5.02107e-06	1	0	1
ENSG00000099875	MKNK2	protein_coding	Q9HBH9	0.768272	8.49235e-24	0.774922	2.52866e-18	0	0	0
ENSG00000099889	ARVCF	protein_coding	O00192	1.04332	9.61782e-28	1.23327	9.33865e-27	0	0	0
ENSG00000099899	TRMT2A	protein_coding	Q8IZ69	1.24138	4.60653e-33	1.20232	6.84349e-30	0	0	0
ENSG00000099904	ZDHHC8	protein_coding	Q9ULC8	1.36719	2.43004e-23	1.18043	2.28366e-28	0	0	0
ENSG00000099910	KLHL22	protein_coding	Q53GT1	0.667356	1.71791e-08	0.930136	1.50626e-12	0	0	0
ENSG00000099949	LZTR1	protein_coding	Q8N653	0.886155	8.25022e-30	0.869331	8.16631e-36	0	0	0
ENSG00000099954	CECR2	protein_coding	Q9BXF3	0.304707	0.00126693	0.497744	3.2573e-07	0	0	0
ENSG00000099991	CABIN1	protein_coding	Q9Y6J0	0.651275	1.97985e-08	1.1285	2.52e-21	0	0	0
ENSG00000100023	PPIL2	protein_coding	Q13356	0.371909	0.00454666	0.361775	0.00629532	0	0	0
ENSG00000100034	PPM1F	protein_coding	P49593	0.843053	5.26878e-27	1.06914	1.1419e-32	0	0	0
ENSG00000100083	GGA1	protein_coding	Q9UJY5	0.880235	9.01065e-19	0.761134	7.384e-18	0	0	0
ENSG00000100106	TRIOBP	protein_coding	Q9H2D6	0.785142	1.15628e-15	0.902694	1.61168e-18	0	0	0
ENSG00000100124	ANKRD54	protein_coding	Q6NXT1	0.619601	2.26588e-12	0.399768	1.44478e-06	0	0	0
ENSG00000100139	MICALL1	protein_coding	Q8N3F8	0.49266	2.83499e-06	0.896681	4.6469e-25	0	0	0
ENSG00000100154	TTC28	protein_coding	Q96AY4	0.37818	0.000657846	0.780393	3.14656e-11	0	0	0
ENSG00000100201	DDX17	protein_coding	Q92841	0.356189	3.89731e-08	0.310834	3.0711e-07	0	0	0
ENSG00000100239	PPP6R2	protein_coding	O75170	0.681838	2.62193e-09	1.09608	1.50623e-30	0	0	0
ENSG00000100241	SBF1	protein_coding	O95248	1.14493	3.31002e-44	1.58017	1.10557e-56	0	0	0
ENSG00000100242	SUN2	protein_coding	Q9UH99	0.668053	1.09489e-12	0.498089	2.51971e-07	0	0	1
ENSG00000100258	LMF2	protein_coding	Q9BU23	0.944959	1.47023e-15	0.927335	8.36694e-13	0	0	0
ENSG00000100263	RHBDD3	protein_coding	Q9Y3P4	1.18296	7.37858e-37	1.32585	4.21179e-30	0	0	0
ENSG00000100296	THOC5	protein_coding	Q13769	0.839986	3.58214e-12	0.752487	1.398e-09	0	0	0
ENSG00000100304	TTLL12	protein_coding	Q14166	0.425615	0.00136238	0.315638	0.00115966	0	0	0
ENSG00000100324	TAB1	protein_coding	Q15750	0.479787	3.27117e-06	0.437986	8.65095e-06	0	0	0
ENSG00000100325	ASCC2	protein_coding	Q9H1I8	1.12647	6.29053e-28	0.601725	1.80615e-06	0	0	0
ENSG00000100335	MIEF1	protein_coding	Q9NQG6	1.0514	2.41865e-21	0.937382	3.40413e-10	1	0	0
ENSG00000100359	SGSM3	protein_coding	Q96HU1	1.006	2.55416e-15	1.07278	7.3463e-16	0	0	0
ENSG00000100364	KIAA0930	protein_coding	#N/A	1.80584	1.79195e-91	1.30244	6.95722e-13	0	0	0
ENSG00000100395	L3MBTL2	protein_coding	Q969R5	0.475532	7.34788e-06	0.608533	1.57525e-06	0	0	0
ENSG00000100403	ZC3H7B	protein_coding	Q9UGR2	1.51138	3.1089e-70	1.27494	8.42086e-39	0	0	0
ENSG00000100422	CERK	protein_coding	Q8TCT0	0.326136	0.000691069	0.546286	3.39116e-08	0	0	0
ENSG00000100425	BRD1	protein_coding	O95696	0.788283	8.87684e-24	0.737773	6.66756e-16	0	0	0
ENSG00000100426	ZBED4	protein_coding	O75132	0.582663	1.56103e-08	0.492483	0.000343759	0	0	0
ENSG00000100726	TELO2	protein_coding	Q9Y4R8	0.780207	1.40176e-18	0.887053	2.20689e-22	0	0	0
ENSG00000100836	PABPN1	protein_coding	Q86U42	0.78656	1.80849e-09	0.655917	2.01567e-09	0	0	0
ENSG00000100908	EMC9	protein_coding	Q9Y3B6	1.74046	5.37389e-20	0.649934	0.00493925	0	0	0
ENSG00000100982	PCIF1	protein_coding	Q9H4Z3	0.988488	3.84451e-20	0.637683	7.7419e-08	0	0	0
ENSG00000100997	ABHD12	protein_coding	Q8N2K0	0.955286	2.88411e-24	0.312652	0.0100307	0	0	1
ENSG00000101057	MYBL2	protein_coding	P10244	0.633131	9.93332e-12	0.687477	2.30634e-14	0	0	0
ENSG00000101104	PABPC1L	protein_coding	Q4VXU2	0.940278	1.95937e-14	1.30376	4.30408e-20	0	0	0
ENSG00000101152	DNAJC5	protein_coding	Q9H3Z4	0.351941	0.000327787	0.499074	4.38454e-10	0	0	0
ENSG00000101199	ARFGAP1	protein_coding	Q8N6T3	0.476967	1.46435e-07	0.577899	7.74789e-11	0	0	0
ENSG00000101216	GMEB2	protein_coding	Q9UKD1	0.761174	2.91314e-13	0.639484	5.20039e-09	0	0	0
ENSG00000101220	C20orf27	protein_coding	Q9GZN8	0.865905	9.79264e-19	0.478054	6.3241e-05	0	0	0
ENSG00000101246	ARFRP1	protein_coding	Q13795	0.734958	2.34296e-06	0.525439	5.94656e-07	0	0	0
ENSG00000101337	TM9SF4	protein_coding	Q92544	0.55415	6.79106e-07	0.358143	0.00158827	0	0	1
ENSG00000101391	CDK5RAP1	protein_coding	Q96SZ6	0.443811	1.03815e-09	0.317771	2.01634e-05	0	0	0
ENSG00000101412	E2F1	protein_coding	Q01094	1.16385	6.51726e-35	1.33604	1.00238e-37	0	0	0
ENSG00000102003	SYP	protein_coding	P08247	0.618977	3.15533e-11	0.430982	3.15882e-05	0	0	1
ENSG00000102225	CDK16	protein_coding	Q00536	0.931899	5.14921e-27	1.13037	3.31074e-32	0	0	0
ENSG00000102858	MGRN1	protein_coding	O60291	0.561205	8.25675e-14	0.794673	9.0503e-22	0	0	0
ENSG00000102901	CENPT	protein_coding	Q96BT3	0.634409	1.62799e-08	0.649377	3.68218e-08	0	0	0
ENSG00000103024	NME3	protein_coding	Q13232	1.10951	6.49042e-13	0.715889	6.36368e-10	1	0	0
ENSG00000103043	VAC14	protein_coding	Q08AM6	0.476549	1.28951e-05	0.542691	3.7689e-08	0	0	0
ENSG00000103067	ESRP2	protein_coding	Q9H6T0	0.865126	2.03985e-07	0.7689	3.53327e-06	0	0	0
ENSG00000103091	WDR59	protein_coding	Q6PJI9	0.423558	1.73031e-05	0.470619	7.68623e-09	0	0	0
ENSG00000103126	AXIN1	protein_coding	O15169	0.943126	5.61675e-25	1.14088	2.33507e-27	0	0	0
ENSG00000103148	NPRL3	protein_coding	Q12980	0.651935	1.46755e-06	0.616749	3.09992e-06	0	0	0
ENSG00000103168	TAF1C	protein_coding	Q15572	1.26057	6.32642e-45	1.15653	3.46284e-34	0	0	0
ENSG00000103197	TSC2	protein_coding	P49815	0.583084	7.54771e-12	0.535486	1.59718e-08	0	0	0
ENSG00000103248	MTHFSD	protein_coding	Q2M296	1.14325	3.13514e-23	0.559164	1.67004e-07	0	0	0
ENSG00000103249	CLCN7	protein_coding	P51798	0.699185	5.10973e-09	0.651384	1.39689e-13	0	0	1
ENSG00000103257	SLC7A5	protein_coding	Q01650	0.944967	2.42215e-31	0.911307	1.48097e-14	0	0	0
ENSG00000103264	FBXO31.1	protein_coding	#N/A	0.863332	1.88011e-12	1.09839	1.27571e-20	0	0	0
ENSG00000103319	EEF2K	protein_coding	O00418	0.804707	4.11556e-23	0.913992	3.04127e-23	0	0	1
ENSG00000103326	CAPN15	protein_coding	O75808	0.684221	1.41826e-12	1.47887	4.32287e-51	0	0	0
ENSG00000103335	PIEZO1	protein_coding	Q92508	1.28103	7.40671e-38	1.48927	1.88088e-51	0	0	0
ENSG00000103502	CDIPT	protein_coding	O14735	0.786516	2.13456e-11	0.785259	9.26564e-07	0	0	0
ENSG00000103507	BCKDK	protein_coding	O14874	0.670682	1.42175e-10	0.402075	5.40958e-06	1	0	0
ENSG00000103549	RNF40	protein_coding	O75150	0.540019	3.57714e-10	0.600588	9.12937e-11	0	0	0
ENSG00000103653	CSK	protein_coding	P41240	0.925802	3.44953e-21	0.449716	1.15076e-06	0	0	0
ENSG00000103932	RPAP1	protein_coding	Q9BWH6	0.506307	3.81445e-07	0.609952	9.7306e-08	0	0	0
ENSG00000103942	HOMER2	protein_coding	Q9NSB8	0.592953	1.78324e-10	0.894598	7.42938e-14	0	0	0
ENSG00000104331	IMPAD1	protein_coding	Q9NX62	0.748498	2.43703e-18	0.55026	4.0771e-07	0	0	1
ENSG00000104714	ERICH1	protein_coding	#N/A	1.02576	1.51306e-14	0.361948	0.0196147	0	0	0
ENSG00000104731	KLHDC4	protein_coding	Q8TBB5	0.430359	0.00042465	0.311155	0.000757055	0	0	0
ENSG00000104774	MAN2B1	protein_coding	O00754	0.500289	8.85285e-07	0.550212	1.08865e-07	0	1	1
ENSG00000104852	SNRNP70	protein_coding	P08621	0.824199	6.79122e-10	0.477209	0.000250699	0	0	0
ENSG00000104859	CLASRP	protein_coding	Q8N2M8	1.05327	1.01731e-16	0.594878	5.39915e-05	0	0	0
ENSG00000104866	PPP1R37	protein_coding	O75864	1.29111	3.93772e-36	1.47543	9.47768e-46	0	0	0
ENSG00000104884	ERCC2	protein_coding	P18074	0.863257	1.88902e-25	0.779842	2.69029e-18	0	0	0
ENSG00000104885	DOT1L	protein_coding	Q8TEK3	0.909743	2.18126e-08	1.18062	1.97696e-16	0	0	0
ENSG00000104907	TRMT1	protein_coding	Q9NXH9	1.05913	2.95741e-30	1.02185	1.46239e-35	1	0	0
ENSG00000104915	STX10	protein_coding	O60499	0.791186	7.02013e-12	0.503353	5.02316e-07	0	0	0
ENSG00000104936	DMPK	protein_coding	Q09013	1.58142	9.61018e-48	1.74299	2.52563e-30	1	0	0
ENSG00000105053	VRK3	protein_coding	Q8IV63	0.640357	5.78079e-11	0.490787	3.07554e-07	0	0	0
ENSG00000105063	PPP6R1	protein_coding	Q9UPN7	1.05027	2.7999e-19	1.20732	3.01967e-53	0	0	0
ENSG00000105072	C19orf44	protein_coding	Q9H6X5	0.435813	5.3448e-07	0.551917	1.24437e-10	0	0	0
ENSG00000105127	AKAP8	protein_coding	O43823	0.750515	1.17433e-13	0.956846	1.42755e-26	0	0	0
ENSG00000105135	ILVBL	protein_coding	A1L0T0	0.625988	2.73942e-06	0.380596	0.00135927	0	1	0
ENSG00000105176	URI1	protein_coding	O94763	1.3764	3.11075e-42	1.11637	5.75568e-27	0	0	0
ENSG00000105186	ANKRD27	protein_coding	Q96NW4	0.452846	2.28554e-07	0.934472	1.01206e-17	0	0	0
ENSG00000105221	AKT2	protein_coding	P31751	1.01033	8.27159e-34	1.30843	8.794e-54	0	0	0
ENSG00000105245	NUMBL	protein_coding	Q9Y6R0	0.935376	1.99169e-12	0.554747	2.2655e-05	0	0	0
ENSG00000105287	PRKD2	protein_coding	Q9BZL6	0.562102	1.55942e-10	0.405771	0.000265858	0	0	0
ENSG00000105357	MYH14	protein_coding	Q7Z406	0.452692	8.03393e-05	0.693628	0.000828771	0	0	0
ENSG00000105373	GLTSCR2	protein_coding	#N/A	0.444482	3.83777e-09	0.545234	2.66997e-10	0	0	0
ENSG00000105397	TYK2	protein_coding	P29597	1.22541	1.19309e-28	1.3982	3.95545e-43	0	0	0
ENSG00000105426	PTPRS	protein_coding	Q13332	0.860249	5.14404e-16	0.86888	7.14201e-19	0	0	1
ENSG00000105429	MEGF8	protein_coding	Q7Z7M0	0.773089	1.48423e-31	1.3198	1.39319e-80	0	0	1
ENSG00000105443	CYTH2	protein_coding	Q99418	1.29344	5.54294e-32	1.05177	1.65719e-24	0	0	0
ENSG00000105483	CARD8	protein_coding	Q9Y2G2	0.433889	0.000290751	0.589184	2.4783e-05	0	0	0
ENSG00000105486	LIG1	protein_coding	P18858	0.61306	9.79089e-16	0.527959	1.50499e-10	0	0	0
ENSG00000105552	BCAT2	protein_coding	O15382	0.562702	1.57662e-07	0.492178	5.38013e-09	1	0	0
ENSG00000105576	TNPO2	protein_coding	O14787	0.948333	1.10566e-55	1.04097	1.18367e-51	0	0	0
ENSG00000105656	ELL	protein_coding	P55199	0.882624	1.20742e-11	0.510075	2.49367e-05	0	0	0
ENSG00000105698	USF2	protein_coding	Q15853	0.921445	7.64427e-13	0.422634	0.00150848	0	0	0
ENSG00000105722	ERF	protein_coding	P50548	0.686163	5.11182e-13	0.414752	0.000449072	0	0	0
ENSG00000105726	ATP13A1	protein_coding	Q9HD20	1.12955	2.44341e-61	1.20714	3.97331e-42	0	0	0
ENSG00000105738	SIPA1L3	protein_coding	O60292	0.694246	2.47052e-07	1.1637	3.26351e-17	0	0	0
ENSG00000106009	BRAT1	protein_coding	Q6PJG6	0.70137	5.8342e-14	0.593079	6.69087e-08	0	0	0
ENSG00000106012	IQCE	protein_coding	Q6IPM2	0.844182	1.42453e-15	1.1237	2.87452e-15	0	0	0
ENSG00000106070	GRB10	protein_coding	Q13322	0.57422	1.44073e-10	0.751097	6.7443e-14	0	0	0
ENSG00000106261	ZKSCAN1	protein_coding	P17029	0.707551	1.27242e-07	0.74515	0.000288789	0	0	0
ENSG00000106266	SNX8	protein_coding	Q9Y5X2	0.682324	2.3265e-11	0.623776	1.05017e-06	0	0	0
ENSG00000106290	TAF6	protein_coding	P49848	0.556259	1.53927e-06	0.849582	2.63514e-16	0	0	0
ENSG00000106348	IMPDH1	protein_coding	P20839	0.647411	1.11822e-07	0.517999	1.04583e-05	0	0	0
ENSG00000106571	GLI3	protein_coding	P10071	0.541374	1.15935e-09	0.855402	4.4944e-21	0	0	0
ENSG00000106683	LIMK1	protein_coding	P53667	0.768332	2.50381e-12	0.493904	0.00269889	0	0	0
ENSG00000106976	DNM1	protein_coding	Q05193	0.891685	5.70933e-13	0.962452	2.26365e-14	0	0	0
ENSG00000107021	TBC1D13	protein_coding	Q9NVG8	0.819421	1.14782e-08	0.324299	0.009116	0	0	0
ENSG00000107130	NCS1	protein_coding	P62166	0.370298	0.00417367	0.457138	2.51853e-05	0	0	0
ENSG00000107262	BAG1	protein_coding	Q99933	0.552883	9.6801e-05	0.646979	1.61103e-05	0	0	0
ENSG00000107263	RAPGEF1	protein_coding	Q13905	0.783096	1.44795e-15	1.29544	2.0826e-34	0	0	0
ENSG00000107331	ABCA2	protein_coding	Q9BZC7	0.994242	9.21255e-16	0.933598	2.12756e-16	0	0	0
ENSG00000107404	DVL1	protein_coding	O14640	1.54638	9.5367e-51	1.5236	6.28688e-61	0	0	0
ENSG00000107521	HPS1	protein_coding	Q92902	1.07633	9.51201e-12	0.558501	0.000202638	0	0	0
ENSG00000107731	UNC5B	protein_coding	Q8IZJ1	0.708322	4.27752e-17	0.801861	5.63042e-16	0	0	1
ENSG00000107815	TWNK	protein_coding	Q96RR1	0.39403	0.00059121	0.515031	7.34772e-05	1	0	0
ENSG00000107862	GBF1	protein_coding	Q92538	0.506416	5.2191e-07	0.747248	3.05917e-13	0	0	0
ENSG00000107957	SH3PXD2A	protein_coding	Q5TCZ1	0.799879	5.30881e-18	0.88016	1.44605e-14	0	0	0
ENSG00000108175	ZMIZ1	protein_coding	Q9ULJ6	0.552747	6.20388e-06	0.814342	3.28166e-12	0	0	0
ENSG00000108262	GIT1	protein_coding	Q9Y2X7	0.517607	3.09589e-06	0.701421	3.95177e-07	0	0	0
ENSG00000108312	UBTF	protein_coding	P17480	0.378331	3.0252e-06	0.737284	2.38162e-31	0	0	0
ENSG00000108465	CDK5RAP3	protein_coding	Q96JB5	0.608592	7.50196e-12	0.441726	5.11401e-06	0	0	0
ENSG00000108469	RECQL5	protein_coding	O94762	0.315396	0.00386689	0.529727	0.00027794	0	0	0
ENSG00000108509	CAMTA2	protein_coding	O94983	0.878431	8.50305e-15	1.25179	4.73356e-26	0	0	0
ENSG00000108557	RAI1	protein_coding	Q7Z5J4	0.642555	8.66289e-08	0.787267	5.68527e-12	0	0	0
ENSG00000108599	AKAP10	protein_coding	O43572	0.527021	3.75221e-05	0.918687	9.59123e-16	1	0	0
ENSG00000108669	CYTH1	protein_coding	Q15438	0.690667	4.97843e-10	0.742017	9.06396e-13	0	0	0
ENSG00000108773	KAT2A	protein_coding	Q92830	1.09785	6.25742e-49	0.347829	0.000347788	0	0	0
ENSG00000108799	EZH1	protein_coding	Q92800	0.868806	2.51794e-22	1.04181	5.1173e-16	0	0	0
ENSG00000108819	PPP1R9B	protein_coding	Q96SB3	0.936896	2.90155e-21	1.12843	8.82013e-25	0	0	0
ENSG00000108840	HDAC5	protein_coding	Q9UQL6	1.19993	7.61491e-38	1.46233	5.00998e-26	0	0	0
ENSG00000109113	RAB34	protein_coding	Q9BZG1	0.32236	0.0132368	0.345283	0.00689155	0	0	0
ENSG00000109118	PHF12	protein_coding	Q96QT6	0.42949	0.000110421	0.55085	3.79927e-06	0	0	0
ENSG00000109436	TBC1D9	protein_coding	Q6ZT07	0.502989	2.19265e-06	0.779435	5.8627e-09	0	0	0
ENSG00000109670	FBXW7	protein_coding	Q969H0	0.557029	3.83423e-08	0.977329	2.72609e-13	0	0	0
ENSG00000109685	WHSC1	protein_coding	#N/A	0.444673	4.1659e-05	0.91036	5.7901e-15	0	0	0
ENSG00000109736	MFSD10	protein_coding	Q14728	0.91248	5.3494e-17	0.762894	1.06971e-08	0	0	0
ENSG00000109756	RAPGEF2	protein_coding	Q9Y4G8	0.685366	5.17827e-11	0.729155	2.06048e-09	0	0	0
ENSG00000110046	ATG2A	protein_coding	Q2TAZ0	1.23606	8.51017e-24	1.32068	4.33673e-33	0	0	0
ENSG00000110074	FOXRED1	protein_coding	Q96CU9	0.48982	6.11371e-08	0.363223	0.000644076	1	0	0
ENSG00000110274	CEP164	protein_coding	Q9UPV0	0.61538	5.10555e-15	0.919328	4.45463e-31	0	0	0
ENSG00000110400	NECTIN1	protein_coding	Q15223	0.803784	3.43246e-08	0.491112	0.0398731	0	0	1
ENSG00000110497	AMBRA1	protein_coding	Q9C0C7	0.38074	8.69641e-07	0.618756	1.37638e-15	0	0	0
ENSG00000110514	MADD	protein_coding	Q8WXG6	0.700958	1.97902e-20	0.935442	6.09247e-26	0	0	0
ENSG00000110756	HPS5	protein_coding	Q9UPZ3	0.30875	0.012376	0.614531	1.44716e-07	0	0	0
ENSG00000110931	CAMKK2	protein_coding	Q96RR4	1.04935	4.13082e-38	1.20329	1.10256e-38	0	0	0
ENSG00000111203	ITFG2	protein_coding	Q969R8	1.10142	2.37406e-37	0.802194	9.569e-14	0	0	0
ENSG00000111206	FOXM1	protein_coding	Q08050	0.361668	6.90259e-05	0.559601	4.46357e-08	0	0	0
ENSG00000111271	ACAD10	protein_coding	Q6JQN1	0.800309	8.78757e-18	1.01209	5.06344e-23	1	0	1
ENSG00000111364	DDX55	protein_coding	Q8NHQ9	0.373443	0.001974	0.367	0.000969341	0	0	0
ENSG00000111641	NOP2	protein_coding	P46087	0.584551	8.6873e-24	0.550948	0.000549033	0	0	0
ENSG00000111676	ATN1	protein_coding	P54259	0.643005	1.68533e-14	0.980065	5.64042e-21	0	0	0
ENSG00000111885	MAN1A1	protein_coding	P33908	0.897098	1.19789e-10	0.884878	8.17631e-09	0	0	1
ENSG00000112146	FBXO9	protein_coding	Q9UK97	0.319976	0.0133573	0.369251	0.00685255	0	0	0
ENSG00000112308	C6orf62	protein_coding	Q9GZU0	0.401755	3.83165e-07	0.643834	7.36363e-16	0	0	0
ENSG00000112406	HECA	protein_coding	Q9UBI9	0.542607	0.000324021	0.786955	8.39386e-08	0	0	0
ENSG00000112419	PHACTR2	protein_coding	O75167	0.443741	0.00399201	0.544981	0.000222452	0	0	0
ENSG00000112701	SENP6	protein_coding	Q9GZR1	0.368596	0.0109585	0.485683	0.00128638	0	0	0
ENSG00000112715	VEGFA	protein_coding	P15692	0.392952	0.0163556	0.925751	2.84605e-11	0	0	0
ENSG00000112759	SLC29A1	protein_coding	Q99808	0.412272	0.00542221	0.351135	0.00513757	0	0	1
ENSG00000112787	FBRSL1	protein_coding	Q9HCM7	1.70427	3.09505e-50	1.48273	1.39892e-35	0	0	0
ENSG00000112941	PAPD7	protein_coding	#N/A	0.55738	4.83491e-05	0.978166	2.70845e-13	0	0	0
ENSG00000113360	DROSHA	protein_coding	Q9NRR4	0.515829	1.12137e-10	0.561234	1.46286e-14	0	0	0
ENSG00000113716	HMGXB3	protein_coding	Q12766	0.519227	5.2481e-07	0.838029	2.64442e-12	0	0	0
ENSG00000114554	PLXNA1	protein_coding	Q9UIW2	0.673673	6.71096e-14	1.23028	1.1529e-34	0	0	1
ENSG00000114646	CSPG5	protein_coding	O95196	1.08271	3.95222e-13	0.922347	9.71541e-10	0	0	1
ENSG00000114650	SCAP	protein_coding	Q12770	1.23183	1.33284e-36	1.45207	6.78255e-37	0	0	1
ENSG00000114738	MAPKAPK3	protein_coding	Q16644	0.526468	2.18095e-06	0.476638	3.34544e-05	0	0	0
ENSG00000114770	ABCC5	protein_coding	O15440	0.632033	7.6e-08	0.706011	5.76699e-06	0	0	1
ENSG00000114857	NKTR	protein_coding	P30414	0.621649	7.24013e-08	1.05392	3.42664e-17	0	0	0
ENSG00000114904	NEK4	protein_coding	P51957	0.313157	0.000949052	0.554736	6.20847e-09	0	0	0
ENSG00000114982	KANSL3	protein_coding	Q9P2N6	0.689278	1.16683e-21	0.628509	3.23709e-11	0	0	0
ENSG00000114993	RTKN	protein_coding	Q9BST9	0.499445	6.27892e-07	0.478365	5.18317e-06	0	0	0
ENSG00000114999	TTL	protein_coding	Q8NG68	0.455115	0.00923714	0.882432	3.32285e-12	0	0	0
ENSG00000115073	ACTR1B	protein_coding	P42025	0.566882	4.76714e-09	0.372179	1.21101e-05	0	0	0
ENSG00000115084	SLC35F5	protein_coding	Q8WV83	0.308283	0.00081268	0.467895	1.4054e-07	0	0	0
ENSG00000115504	EHBP1	protein_coding	Q8NDI1	0.840616	4.64219e-18	0.735837	6.5578e-13	0	0	0
ENSG00000115568	ZNF142	protein_coding	P52746	0.385868	6.30069e-05	0.37697	0.000381864	0	0	0
ENSG00000115687	PASK	protein_coding	Q96RG2	0.902665	1.9623e-22	0.840475	1.18621e-23	0	0	0
ENSG00000115694	STK25	protein_coding	O00506	0.608532	8.86217e-18	0.789411	3.34026e-27	0	0	0
ENSG00000115816	CEBPZ	protein_coding	Q03701	0.433962	5.85245e-08	0.525166	3.59232e-11	0	0	0
ENSG00000116017	ARID3A	protein_coding	Q99856	0.541601	4.79489e-08	0.519771	5.61686e-07	0	0	0
ENSG00000116133	DHCR24	protein_coding	Q15392	0.31213	0.00122558	0.358628	2.68535e-05	1	0	1
ENSG00000116337	AMPD2	protein_coding	Q01433	0.39444	0.000717438	0.550206	0.000159203	0	0	0
ENSG00000116353	MECR	protein_coding	Q9BV79	0.940696	7.52869e-31	0.315479	0.000647083	1	0	0
ENSG00000116580	GON4L	protein_coding	Q3T8J9	0.493847	1.37934e-15	0.648388	1.27513e-27	0	0	0
ENSG00000116604	MEF2D	protein_coding	Q14814	0.62733	1.20604e-05	0.679328	1.42215e-07	0	0	0
ENSG00000116691	MIIP	protein_coding	Q5JXC2	0.956355	6.72836e-14	0.662036	1.92598e-06	0	0	0
ENSG00000116704	SLC35D1	protein_coding	Q9NTN3	0.604512	1.35249e-05	0.309449	0.00212036	0	0	1
ENSG00000116786	PLEKHM2	protein_coding	Q8IWE5	0.832344	1.43335e-16	1.15505	2.13224e-24	0	0	0
ENSG00000116871	MAP7D1	protein_coding	Q3KQU3	0.644244	7.41901e-15	0.692186	2.95733e-14	0	0	0
ENSG00000116991	SIPA1L2	protein_coding	Q9P2F8	0.619988	9.99043e-09	0.924361	4.43333e-23	0	0	0
ENSG00000117408	IPO13	protein_coding	O94829	0.417431	7.34476e-06	0.933555	2.66644e-17	0	0	0
ENSG00000117411	B4GALT2	protein_coding	O60909	1.46547	2.14734e-33	1.60415	3.90175e-27	0	0	0
ENSG00000117616	RSRP1	protein_coding	Q9BUV0	0.530708	1.58455e-07	0.346967	0.00032248	0	0	0
ENSG00000118046	STK11	protein_coding	Q15831	1.34041	3.19299e-37	1.55343	1.66409e-57	0	0	0
ENSG00000118058	KMT2A	protein_coding	Q03164	0.833327	1.124e-13	1.34426	1.85077e-29	0	0	0
ENSG00000118454	ANKRD13C	protein_coding	Q8N6S4	0.371819	0.000107391	0.668562	1.871e-11	0	0	0
ENSG00000118495	PLAGL1	protein_coding	Q9UM63	0.613457	4.31631e-06	0.79868	1.39249e-09	0	0	0
ENSG00000118900	UBN1	protein_coding	Q9NPG3	0.613438	5.03921e-09	0.967091	7.11878e-19	0	0	0
ENSG00000119042	SATB2	protein_coding	Q9UPW6	0.596073	4.62831e-11	0.66233	3.40849e-12	0	0	0
ENSG00000119138	KLF9	protein_coding	Q13886	0.503511	0.00196411	0.383987	0.00342742	0	0	0
ENSG00000119321	FKBP15	protein_coding	Q5T1M5	0.305821	0.000116028	0.394963	1.97397e-06	0	0	0
ENSG00000119333	WDR34	protein_coding	Q96EX3	1.00202	2.4501e-26	0.572502	3.29088e-09	0	0	0
ENSG00000119487	MAPKAP1	protein_coding	Q9BPZ7	0.743379	7.3786e-08	0.54837	0.00385509	0	1	0
ENSG00000119522	DENND1A	protein_coding	Q8TEH3	0.749938	1.16521e-08	0.621078	2.31553e-06	0	0	0
ENSG00000119599	DCAF4	protein_coding	Q8WV16	0.792408	7.24782e-15	0.578812	5.98532e-07	0	0	0
ENSG00000119685	TTLL5	protein_coding	Q6EMB2	0.34855	0.000470512	0.61955	2.46128e-08	0	0	0
ENSG00000119688	ABCD4	protein_coding	O14678	0.878841	2.52755e-24	1.16616	5.83453e-31	0	0	0
ENSG00000120093	HOXB3	protein_coding	P14651	1.11398	2.07727e-19	1.20012	1.79723e-17	0	0	0
ENSG00000120314	WDR55	protein_coding	Q9H6Y2	0.810634	1.57289e-26	0.636682	9.30928e-11	0	0	0
ENSG00000120709	FAM53C	protein_coding	Q9NYF3	0.47286	1.46498e-06	0.393444	3.61429e-05	0	0	0
ENSG00000121289	CEP89	protein_coding	Q96ST8	0.570954	1.60319e-08	0.551131	3.4704e-09	1	0	0
ENSG00000122490	PQLC1	protein_coding	Q8N2U9	1.30892	1.75805e-31	1.3779	5.23236e-19	0	0	0
ENSG00000122515	ZMIZ2	protein_coding	Q8NF64	0.500715	9.13558e-08	1.14813	1.35874e-30	0	0	0
ENSG00000122966	CIT	protein_coding	O14578	0.334307	0.00481996	0.768076	4.39326e-17	0	0	0
ENSG00000123066	MED13L	protein_coding	Q71F56	0.392793	5.39537e-06	1.01067	5.10694e-27	0	0	0
ENSG00000123143	PKN1	protein_coding	Q16512	0.653661	2.51234e-12	0.666147	9.6063e-18	0	0	0
ENSG00000123636	BAZ2B	protein_coding	Q9UIF8	0.408632	2.74047e-05	1.06319	1.7052e-24	0	0	0
ENSG00000123739	PLA2G12A	protein_coding	Q9BZM1	0.920868	1.67007e-20	0.592626	0.00011174	0	0	0
ENSG00000123933	MXD4	protein_coding	Q14582	1.09712	4.2215e-21	1.10647	0.0021495	0	0	0
ENSG00000124006	OBSL1	protein_coding	O75147	0.633822	3.33245e-09	0.347106	0.00389225	0	0	0
ENSG00000124181	PLCG1	protein_coding	P19174	0.426251	0.000507374	0.623871	7.23824e-09	0	0	0
ENSG00000124201	ZNFX1	protein_coding	Q9P2E3	0.420287	0.0016736	0.669745	1.24993e-07	0	0	0
ENSG00000124222	STX16	protein_coding	O14662	0.530252	0.000611774	0.968373	7.31209e-13	0	0	0
ENSG00000124574	ABCC10	protein_coding	Q5T3U5	1.17872	1.26466e-24	1.33276	1.00709e-37	0	0	1
ENSG00000124608	AARS2	protein_coding	Q5JTZ9	1.16004	4.26858e-55	0.90023	3.67062e-17	1	0	1
ENSG00000124782	RREB1	protein_coding	Q92766	0.518641	1.07681e-05	0.628386	5.67631e-09	0	0	0
ENSG00000124788	ATXN1	protein_coding	P54253	0.527493	6.68932e-06	1.03663	1.72971e-13	0	0	0
ENSG00000125266	EFNB2	protein_coding	P52799	0.603415	3.91792e-10	0.745123	1.02418e-07	0	0	0
ENSG00000125386	FAM193A	protein_coding	#N/A	0.397308	0.000544885	0.857252	1.09325e-12	0	0	0
ENSG00000125447	GGA3	protein_coding	Q9NZ52	0.62135	1.43088e-16	0.665938	9.46703e-16	0	0	0
ENSG00000125503	PPP1R12C	protein_coding	Q9BZL4	1.64361	7.25772e-58	1.43968	2.38084e-60	0	0	0
ENSG00000125648	SLC25A23	protein_coding	Q9BV35	1.15919	2.00576e-27	1.14008	6.22651e-23	1	0	0
ENSG00000125734	GPR108	protein_coding	Q9NPR9	0.47307	0.00172476	0.726299	4.1926e-10	0	0	1
ENSG00000125753	VASP	protein_coding	P50552	0.638972	6.42433e-10	0.350106	0.000534132	0	0	0
ENSG00000125755	SYMPK	protein_coding	Q92797	0.790736	2.29104e-20	0.496157	1.72289e-10	0	0	0
ENSG00000125817	CENPB	protein_coding	P07199	0.761108	2.58232e-12	0.623597	1.93314e-10	0	0	0
ENSG00000125844	RRBP1	protein_coding	Q9P2E9	1.11148	4.12951e-29	1.21049	1.31029e-41	0	0	1
ENSG00000125912	NCLN	protein_coding	Q969V3	0.774636	1.55512e-08	0.707012	2.67324e-10	0	0	1
ENSG00000126001	CEP250	protein_coding	Q9BV73	0.53421	1.47441e-05	0.995338	5.00891e-15	0	0	0
ENSG00000126012	KDM5C	protein_coding	P41229	0.720932	1.54569e-20	0.74765	8.8472e-21	0	0	0
ENSG00000126062	TMEM115	protein_coding	Q12893	0.8903	2.17325e-21	0.574616	3.84699e-09	0	0	1
ENSG00000126107	HECTD3	protein_coding	Q5T447	0.350581	0.0239645	0.579686	2.74188e-07	0	0	0
ENSG00000126214	KLC1	protein_coding	Q07866	1.00874	8.44398e-16	1.25808	4.36393e-19	0	0	0
ENSG00000126461	SCAF1	protein_coding	Q9H7N4	0.791715	4.74796e-17	0.774495	4.37591e-21	0	0	0
ENSG00000126464	PRR12	protein_coding	Q9ULL5	0.817273	6.55475e-06	0.679752	4.75082e-06	0	0	0
ENSG00000126581	BECN1	protein_coding	Q14457	0.809483	4.25644e-24	0.811044	7.22764e-14	0	0	0
ENSG00000126705	AHDC1	protein_coding	Q5TGY3	0.710794	6.27841e-13	0.748681	1.12491e-12	0	0	0
ENSG00000126814	TRMT5	protein_coding	Q32P41	0.686713	0.0034139	0.515952	0.00450506	0	0	0
ENSG00000126934	MAP2K2	protein_coding	P36507	0.66907	2.64384e-08	0.66974	7.75703e-28	0	0	0
ENSG00000127054	CPSF3L	protein_coding	#N/A	0.610023	4.68391e-11	0.56124	1.94704e-14	0	0	0
ENSG00000127483	HP1BP3	protein_coding	Q5SSJ5	0.653579	5.73494e-22	0.655125	3.07496e-17	0	0	0
ENSG00000127564	PKMYT1	protein_coding	Q99640	1.20071	1.34106e-33	0.975159	3.63598e-35	0	0	0
ENSG00000127586	CHTF18	protein_coding	Q8WVB6	0.78267	2.07852e-15	1.00561	5.09973e-33	0	0	0
ENSG00000127616	SMARCA4	protein_coding	P51532	0.621574	2.74975e-16	0.53569	6.83125e-05	0	0	0
ENSG00000127663	KDM4B	protein_coding	O94953	0.426955	0.000662957	0.513596	0.00221948	0	0	0
ENSG00000128159	TUBGCP6	protein_coding	Q96RT7	1.18323	6.92548e-81	1.39948	1.33379e-70	0	0	0
ENSG00000128191	DGCR8	protein_coding	Q8WYQ5	1.15897	3.39305e-30	1.14231	1.5025e-15	0	0	0
ENSG00000128283	CDC42EP1	protein_coding	Q00587	0.499552	0.000763455	0.582627	1.16444e-05	0	0	0
ENSG00000128563	PRKRIP1	protein_coding	Q9H875	0.458252	0.00217979	0.470176	0.00287273	0	0	0
ENSG00000128602	SMO	protein_coding	Q99835	1.21649	2.2763e-38	1.03015	2.72526e-08	0	0	0
ENSG00000128713	HOXD11	protein_coding	P31277	1.7812	4.25502e-45	1.32203	3.92269e-20	0	0	0
ENSG00000128829	EIF2AK4	protein_coding	Q9P2K8	0.337205	0.00724548	0.424454	0.000562599	0	0	0
ENSG00000128908	INO80	protein_coding	Q9ULG1	0.451514	3.99482e-05	1.05123	8.15231e-33	0	0	0
ENSG00000129250	KIF1C	protein_coding	O43896	0.496946	4.89427e-07	1.15356	3.77357e-23	0	0	0
ENSG00000129347	KRI1	protein_coding	Q8N9T8	0.69749	5.73803e-27	0.487649	2.45773e-05	0	0	0
ENSG00000129566	TEP1	protein_coding	Q99973	0.874948	6.41754e-22	1.00357	2.45656e-19	0	0	0
ENSG00000129925	TMEM8A	protein_coding	Q9HCN3	1.48529	5.92201e-41	1.58425	1.82265e-37	0	0	0
ENSG00000129933	MAU2	protein_coding	Q9Y6X3	1.03117	5.91926e-23	1.09295	4.96012e-31	0	0	0
ENSG00000130159	ECSIT	protein_coding	Q9BQ95	0.767329	9.07832e-10	0.422879	2.6945e-05	1	0	0
ENSG00000130164	LDLR	protein_coding	P01130	0.511508	0.0102515	0.506487	0.00510606	0	0	1
ENSG00000130294	KIF1A	protein_coding	Q12756	0.590247	8.08822e-15	0.59954	0.000843611	0	1	1
ENSG00000130299	GTPBP3	protein_coding	Q969Y2	0.653338	1.39313e-14	0.612617	7.85453e-14	1	0	0
ENSG00000130313	PGLS	protein_coding	O95336	0.625978	4.30753e-09	0.358054	0.000674448	0	0	0
ENSG00000130338	TULP4	protein_coding	Q9NRJ4	0.370058	0.00453256	1.15431	1.29258e-22	0	0	0
ENSG00000130382	MLLT1	protein_coding	Q03111	1.0272	1.35371e-19	1.20226	1.5691e-22	0	0	0
ENSG00000130508	PXDN	protein_coding	Q92626	0.441366	2.93702e-06	0.542759	5.6241e-10	0	0	1
ENSG00000130522	JUND	protein_coding	P17535	1.03965	2.04766e-15	0.915528	7.32976e-10	0	0	0
ENSG00000130559	CAMSAP1	protein_coding	Q5T5Y3	0.358055	0.00122925	0.536271	2.84103e-06	0	0	0
ENSG00000130669	PAK4	protein_coding	O96013	0.800545	2.38931e-10	0.467858	1.89707e-06	0	0	0
ENSG00000130702	LAMA5	protein_coding	O15230	0.942709	1.4516e-24	1.19096	3.1836e-35	0	0	1
ENSG00000130714	POMT1	protein_coding	Q9Y6A1	1.01497	3.00989e-23	1.03888	1.97679e-19	0	0	1
ENSG00000130717	UCK1	protein_coding	Q9HA47	0.677009	7.02455e-10	0.933328	1.21879e-12	0	0	0
ENSG00000130723	PRRC2B	protein_coding	Q5JSZ5	1.00119	4.0186e-24	1.31527	1.31285e-50	0	0	0
ENSG00000130733	YIPF2	protein_coding	Q9BWQ6	0.897446	6.47816e-11	0.352391	0.0476946	0	0	1
ENSG00000130749	ZC3H4	protein_coding	Q9UPT8	0.582918	3.0499e-22	0.510936	9.41122e-12	0	0	0
ENSG00000130766	SESN2	protein_coding	P58004	0.55307	2.43061e-07	0.30962	0.00631057	0	0	0
ENSG00000130779	CLIP1	protein_coding	P30622	0.670705	0.000690692	0.524052	0.0173375	0	0	0
ENSG00000130821	SLC6A8	protein_coding	P48029	1.16527	3.15188e-45	1.37894	5.19612e-47	0	0	0
ENSG00000130827	PLXNA3	protein_coding	P51805	1.18019	2.90112e-24	1.5928	1.4098e-48	0	0	0
ENSG00000130881	LRP3	protein_coding	O75074	1.10254	5.55807e-22	1.5228	2.34272e-20	0	0	0
ENSG00000131067	GGT7	protein_coding	Q9UJ14	1.09645	1.69417e-19	0.63616	3.20951e-07	0	0	0
ENSG00000131149	GSE1	protein_coding	Q14687	0.520035	3.05057e-07	0.665129	8.4975e-13	0	0	0
ENSG00000131323	TRAF3	protein_coding	Q13114	0.989835	7.00045e-19	1.22351	1.00772e-19	0	0	0
ENSG00000131381	RBSN	protein_coding	Q9H1K0	0.344412	0.00351702	0.513222	2.24111e-06	0	0	0
ENSG00000131446	MGAT1	protein_coding	P26572	0.592976	1.88628e-13	0.611446	2.01618e-08	0	0	0
ENSG00000131584	ACAP3	protein_coding	Q96P50	1.26723	2.19946e-34	1.5002	1.96957e-33	0	0	0
ENSG00000131653	TRAF7	protein_coding	Q6Q0C0	0.754813	1.13798e-19	0.801713	9.46565e-09	0	0	0
ENSG00000131697	NPHP4	protein_coding	O75161	0.88723	7.43818e-15	1.20917	1.13919e-46	0	0	0
ENSG00000131732	ZCCHC9	protein_coding	Q8N567	0.458007	6.51664e-05	0.346957	0.0024484	0	0	0
ENSG00000131759	RARA	protein_coding	P10276	0.713834	3.3064e-09	0.87627	1.00538e-13	0	0	0
ENSG00000132005	RFX1	protein_coding	P22670	1.00968	1.54593e-15	0.553659	3.36887e-07	0	0	0
ENSG00000132024	CC2D1A	protein_coding	Q6P1N0	0.538047	4.73849e-08	0.4884	0.000144253	0	0	0
ENSG00000132155	RAF1	protein_coding	P04049	0.489665	3.64643e-09	0.708131	1.16296e-11	0	0	0
ENSG00000132182	NUP210	protein_coding	Q8TEM1	0.416967	2.04598e-14	0.335242	3.86103e-07	0	1	1
ENSG00000132199	ENOSF1	protein_coding	Q7L5Y1	0.446857	3.1567e-05	0.554351	1.17018e-06	0	0	0
ENSG00000132361	CLUH	protein_coding	O75153	1.02901	2.44558e-23	0.886813	1.47249e-18	0	0	0
ENSG00000132382	MYBBP1A	protein_coding	Q9BQG0	0.589918	2.77439e-06	0.340579	2.91049e-05	0	0	0
ENSG00000132405	TBC1D14	protein_coding	Q9P2M4	0.588673	9.76846e-13	0.579116	1.29773e-06	0	0	0
ENSG00000132478	UNK	protein_coding	Q9C0B0	0.666043	1.19639e-10	0.993429	5.92455e-19	0	0	0
ENSG00000132510	KDM6B	protein_coding	O15054	0.847382	6.32789e-17	1.29446	1.42848e-16	0	0	0
ENSG00000132612	VPS4A	protein_coding	Q9UN37	0.328265	0.0324117	0.773846	1.93906e-07	0	0	0
ENSG00000132613	MTSS1L	protein_coding	Q765P7	0.797199	1.79049e-14	1.05691	1.80101e-23	0	0	0
ENSG00000132635	PCED1A	protein_coding	Q9H1Q7	1.50303	1.60497e-41	1.42205	5.38781e-26	0	0	0
ENSG00000132680	KIAA0907	protein_coding	#N/A	0.565493	1.22784e-10	0.798415	1.09516e-13	0	0	0
ENSG00000132694	ARHGEF11	protein_coding	O15085	0.723374	3.23238e-16	1.08774	1.30446e-26	0	0	0
ENSG00000133030	MPRIP	protein_coding	Q6WCQ1	0.320551	0.0405687	0.872881	3.52697e-11	0	0	0
ENSG00000133065	SLC41A1	protein_coding	Q8IVJ1	0.646492	1.73361e-12	0.97901	2.80023e-23	0	0	1
ENSG00000133243	BTBD2	protein_coding	Q9BX70	1.08637	5.24551e-21	0.796417	3.59054e-07	0	0	0
ENSG00000133275	CSNK1G2	protein_coding	P78368	1.02171	8.97529e-18	1.24931	2.45729e-23	0	0	0
ENSG00000133422	MORC2	protein_coding	Q9Y6X9	0.352348	1.62705e-05	0.372972	0.00156594	0	0	0
ENSG00000133597	ADCK2	protein_coding	Q7Z695	0.57023	1.56035e-08	0.686642	4.24208e-08	1	0	1
ENSG00000133612	AGAP3	protein_coding	Q96P47	1.51377	1.61877e-113	1.19101	4.00661e-29	0	0	0
ENSG00000133619	KRBA1	protein_coding	A5PL33	0.795352	1.02137e-18	0.877763	6.22651e-23	0	0	0
ENSG00000133895	MEN1	protein_coding	O00255	0.383985	9.59526e-05	0.336855	0.000418739	0	0	0
ENSG00000134046	MBD2	protein_coding	Q9UBB5	1.1778	1.58094e-26	0.598731	0.000185826	0	0	0
ENSG00000134248	LAMTOR5	protein_coding	O43504	1.5427	6.64424e-16	0.45963	0.00677948	0	0	0
ENSG00000134285	FKBP11	protein_coding	Q9NYL4	1.38215	3.47394e-14	1.56725	4.88033e-05	0	0	0
ENSG00000134504	KCTD1	protein_coding	Q719H9	0.68971	1.86778e-10	0.680218	1.78082e-08	0	0	0
ENSG00000134508	CABLES1	protein_coding	Q8TDN4	0.765304	2.43973e-06	0.80926	1.37889e-08	0	0	0
ENSG00000134569	LRP4	protein_coding	O75096	1.18604	1.6638e-24	1.12155	2.03759e-20	0	0	0
ENSG00000134686	PHC2	protein_coding	Q8IXK0	0.404516	1.56866e-06	0.736721	1.81484e-28	0	0	1
ENSG00000134779	TPGS2	protein_coding	Q68CL5	0.892669	2.06394e-20	0.461556	2.15563e-05	0	0	0
ENSG00000134815	DHX34	protein_coding	Q14147	0.428258	2.20971e-07	0.806185	9.49197e-15	0	0	0
ENSG00000134874	DZIP1	protein_coding	Q86YF9	0.582097	3.0975e-08	1.16319	4.33442e-25	0	0	0
ENSG00000134905	CARS2	protein_coding	Q9HA77	0.45191	4.04266e-05	0.624893	8.8918e-07	1	0	0
ENSG00000135365	PHF21A	protein_coding	Q96BD5	0.365613	0.000272241	0.344878	0.000392167	0	0	0
ENSG00000135392	DNAJC14	protein_coding	Q6Y2X3	0.422059	9.9814e-06	0.552302	6.04464e-07	0	0	0
ENSG00000135451	TROAP	protein_coding	Q12815	0.776325	4.87489e-18	0.506367	3.8349e-10	0	0	0
ENSG00000135476	ESPL1	protein_coding	Q14674	0.526013	3.43549e-11	0.895116	5.46433e-18	0	0	0
ENSG00000135541	AHI1	protein_coding	Q8N157	0.484966	3.84694e-05	0.686308	2.97286e-13	0	0	0
ENSG00000135723	FHOD1	protein_coding	Q9Y613	0.709057	2.35467e-14	0.361898	2.58879e-05	0	0	0
ENSG00000135749	PCNX2	protein_coding	A6NKB5	1.20959	5.47032e-21	1.54818	3.16114e-32	0	0	0
ENSG00000135870	RC3H1	protein_coding	Q5TC82	0.305926	0.0112685	0.827773	9.92422e-16	0	0	0
ENSG00000136295	TTYH3	protein_coding	Q9C0H2	1.02549	1.52087e-26	1.09702	3.75706e-34	0	0	0
ENSG00000136643	RPS6KC1	protein_coding	Q96S38	0.461498	1.77872e-06	0.535832	1.09746e-09	0	0	1
ENSG00000136699	SMPD4	protein_coding	Q9NXE4	0.931972	1.6935e-18	1.12509	3.24382e-21	0	0	0
ENSG00000136830	FAM129B	protein_coding	Q96TA1	0.346127	0.00013011	0.585196	6.95853e-12	0	0	0
ENSG00000136848	DAB2IP	protein_coding	Q5VWQ8	0.646268	4.43089e-06	1.11529	2.79965e-19	0	0	0
ENSG00000136877	FPGS	protein_coding	Q05932	1.28367	3.28114e-19	0.80947	5.15097e-09	1	0	0
ENSG00000136878	USP20	protein_coding	Q9Y2K6	0.678573	3.52436e-10	0.827126	7.9376e-18	0	0	0
ENSG00000136932	TRMO	protein_coding	Q9BU70	0.789097	6.52884e-08	0.694477	1.86217e-05	0	0	0
ENSG00000136935	GOLGA1	protein_coding	Q92805	1.0744	9.6176e-10	1.03734	6.53556e-07	0	0	0
ENSG00000137221	TJAP1	protein_coding	Q5JTD0	0.492591	4.36649e-07	0.549684	3.40857e-06	0	0	0
ENSG00000137504	CREBZF	protein_coding	Q9NS37	0.531451	0.000593847	0.919677	1.23956e-15	0	0	0
ENSG00000137817	PARP6	protein_coding	Q2NL67	0.747966	9.65728e-08	1.45086	4.52124e-27	0	0	0
ENSG00000137824	RMDN3	protein_coding	Q96TC7	0.724261	6.5755e-12	0.554227	1.8975e-06	1	0	0
ENSG00000137834	SMAD6	protein_coding	O43541	0.757093	1.21532e-13	1.00459	1.78092e-21	0	0	1
ENSG00000138031	ADCY3	protein_coding	O60266	0.781426	1.0775e-10	0.966306	2.70995e-16	0	0	0
ENSG00000138073	PREB	protein_coding	Q9HCU5	0.744352	3.34474e-11	0.338172	0.0441945	0	0	1
ENSG00000138834	MAPK8IP3	protein_coding	Q9UPT6	1.4048	8.03037e-45	1.61108	1.73003e-54	0	0	0
ENSG00000139645	ANKRD52	protein_coding	Q8NB46	0.637685	5.30608e-23	0.936319	9.46987e-38	0	0	0
ENSG00000139718	SETD1B	protein_coding	Q9UPS6	0.50803	1.03729e-05	1.23761	3.46667e-19	0	0	0
ENSG00000140265	ZSCAN29	protein_coding	Q8IWY8	0.405338	0.000896364	0.49357	0.000151307	0	0	0
ENSG00000140332	TLE3	protein_coding	Q04726	0.604188	5.49394e-22	0.81322	5.17893e-32	0	0	0
ENSG00000140400	MAN2C1	protein_coding	Q9NTJ4	1.17389	8.61937e-39	1.27865	1.0197e-37	0	0	0
ENSG00000140443	IGF1R	protein_coding	P08069	0.306281	0.0288493	0.732723	7.65574e-09	0	0	0
ENSG00000140451	PIF1	protein_coding	Q9H611	1.33448	3.64311e-17	1.20651	1.8724e-18	1	0	1
ENSG00000140474	ULK3	protein_coding	Q6PHR2	1.02366	1.19607e-27	1.12238	6.10907e-20	0	0	0
ENSG00000140479	PCSK6	protein_coding	P29122	0.477911	2.67095e-05	0.656751	1.89565e-06	0	0	0
ENSG00000140521	POLG	protein_coding	P54098	1.02477	4.62089e-25	1.11287	1.32689e-25	1	0	1
ENSG00000140534	TICRR	protein_coding	Q7Z2Z1	0.730465	1.5126e-08	0.649963	1.66722e-06	0	0	1
ENSG00000140564	FURIN	protein_coding	P09958	0.977172	5.35842e-23	1.2425	1.03476e-31	0	0	0
ENSG00000140577	CRTC3	protein_coding	Q6UUV7	0.324456	0.00459419	0.632131	2.8487e-09	0	0	1
ENSG00000140688	C16orf58	protein_coding	Q96GQ5	0.643197	5.81986e-08	0.427275	1.29655e-05	0	0	0
ENSG00000140836	ZFHX3	protein_coding	Q15911	0.317975	0.010414	0.819021	1.68577e-10	0	0	0
ENSG00000140854	KATNB1	protein_coding	Q9BVA0	1.35671	3.78181e-50	1.0525	3.91351e-27	0	0	0
ENSG00000140948	ZCCHC14	protein_coding	Q8WYQ9	0.385232	2.13388e-06	1.14249	6.0809e-30	0	0	0
ENSG00000140983	RHOT2	protein_coding	Q8IXI1	1.10197	9.98597e-17	0.773426	1.51447e-21	1	0	0
ENSG00000140992	PDPK1	protein_coding	O15530	0.439073	3.60538e-06	0.625391	3.22362e-05	0	0	0
ENSG00000140995	DEF8	protein_coding	Q6ZN54	0.747242	3.81079e-18	0.520864	1.35603e-09	0	0	0
ENSG00000141002	TCF25	protein_coding	Q9BQ70	0.370508	7.11147e-05	0.450303	1.05815e-07	0	0	0
ENSG00000141027	NCOR1	protein_coding	O75376	0.390864	5.39332e-12	0.544781	7.53103e-17	0	0	0
ENSG00000141084	RANBP10	protein_coding	Q6VN20	1.07713	7.10885e-38	1.08781	1.83767e-28	0	0	0
ENSG00000141258	SGSM2	protein_coding	O43147	0.987631	1.04901e-22	1.45337	4.41566e-26	0	0	0
ENSG00000141384	TAF4B	protein_coding	Q92750	0.66901	1.76641e-14	0.841914	4.89362e-13	0	0	0
ENSG00000141456	PELP1	protein_coding	Q8IZL8	0.522893	1.13711e-05	0.578218	1.87426e-10	0	0	0
ENSG00000141503	MINK1	protein_coding	Q8N4C8	0.822109	7.32892e-21	1.1686	1.4108e-31	0	0	0
ENSG00000141522	ARHGDIA	protein_coding	P52565	0.36843	0.0148688	0.338663	0.00873008	0	0	0
ENSG00000141551	CSNK1D	protein_coding	P48730	0.584991	1.32565e-13	0.619022	3.2345e-13	0	0	0
ENSG00000141564	RPTOR	protein_coding	Q8N122	0.436094	0.000516978	0.740094	1.79149e-08	0	0	0
ENSG00000141568	FOXK2	protein_coding	Q01167	0.667607	4.47382e-13	0.524858	3.31262e-09	0	0	0
ENSG00000141569	TRIM65	protein_coding	Q6PJ69	0.736373	3.62557e-14	0.690983	2.15745e-11	0	0	0
ENSG00000141580	WDR45B	protein_coding	Q5MNZ6	0.337548	0.00137418	0.851245	4.30373e-18	0	0	0
ENSG00000141644	MBD1	protein_coding	Q9UIS9	0.72061	1.896e-23	0.925536	1.062e-26	0	0	0
ENSG00000141736	ERBB2	protein_coding	P04626	0.493969	6.8822e-07	0.835739	5.89823e-18	0	0	0
ENSG00000141858	SAMD1	protein_coding	Q6SPF0	0.452876	0.000373512	0.640296	9.2384e-07	0	0	1
ENSG00000141867	BRD4	protein_coding	O60885	0.734117	1.63267e-31	0.687579	1.12674e-27	0	0	0
ENSG00000141905	NFIC	protein_coding	P08651	0.697632	4.46729e-08	0.725831	1.07213e-09	0	0	0
ENSG00000141959	PFKL	protein_coding	P17858	0.512723	1.06872e-07	0.362336	0.0025297	0	0	0
ENSG00000141994	DUS3L	protein_coding	Q96G46	0.619432	1.05649e-13	0.666896	4.19246e-06	0	0	0
ENSG00000142002	DPP9	protein_coding	Q86TI2	0.405676	3.86661e-05	0.538409	3.7088e-14	0	0	0
ENSG00000142186	SCYL1	protein_coding	Q96KG9	0.79375	3.16893e-14	0.564115	4.54665e-09	0	0	0
ENSG00000142208	AKT1	protein_coding	P31749	1.33747	9.39877e-46	1.17546	6.19094e-22	0	0	0
ENSG00000142444	TIMM29	protein_coding	Q9BSF4	0.655724	2.50108e-09	0.305712	0.0091206	1	0	0
ENSG00000142599	RERE	protein_coding	Q9P2R6	0.458281	5.0009e-09	0.71751	6.97979e-10	0	0	0
ENSG00000142627	EPHA2	protein_coding	P29317	0.709894	7.00446e-06	0.478727	0.0014067	0	0	0
ENSG00000142687	KIAA0319L	protein_coding	Q8IZA0	0.40582	5.9339e-08	0.746245	4.83396e-16	0	0	1
ENSG00000142751	GPN2	protein_coding	Q9H9Y4	0.88563	1.88272e-18	0.43328	3.46779e-05	0	0	1
ENSG00000142784	WDTC1	protein_coding	Q8N5D0	0.784573	6.52416e-11	1.1487	7.27087e-24	0	0	0
ENSG00000142949	PTPRF	protein_coding	P10586	0.845622	1.48295e-09	0.721789	1.2671e-06	0	0	0
ENSG00000143093	STRIP1	protein_coding	Q5VSL9	0.398689	0.000400704	0.545136	1.51483e-05	0	0	1
ENSG00000143303	RRNAD1	protein_coding	Q96FB5	0.777486	6.04578e-18	0.639835	3.36621e-12	0	0	0
ENSG00000143515	ATP8B2	protein_coding	P98198	0.796159	2.63847e-16	1.49202	3.64261e-35	0	0	0
ENSG00000143537	ADAM15	protein_coding	Q13444	0.723169	9.75705e-25	0.621892	6.20844e-18	0	0	0
ENSG00000143674	RP5-862P8.2	protein_coding	#N/A	0.394935	0.0119506	0.944882	6.53765e-10	0	0	1
ENSG00000143793	C1orf35	protein_coding	#N/A	0.781025	9.59693e-32	0.326082	5.17577e-07	0	0	0
ENSG00000143801	PSEN2	protein_coding	P49810	0.39328	0.000395905	0.467764	2.8777e-07	0	0	0
ENSG00000143811	PYCR2	protein_coding	Q96C36	0.696825	2.76343e-08	1.02769	6.37587e-13	1	0	1
ENSG00000144283	PKP4	protein_coding	Q99569	0.610486	4.89325e-05	0.940202	2.42404e-10	0	0	0
ENSG00000144504	ANKMY1	protein_coding	Q9P2S6	1.82114	3.39594e-77	1.57808	3.43241e-20	0	0	0
ENSG00000144524	COPS7B	protein_coding	Q9H9Q2	0.306692	0.000512166	0.480075	0.000248331	0	0	0
ENSG00000144579	CTDSP1	protein_coding	Q9GZU7	0.451873	9.61427e-05	0.726177	4.86239e-07	0	0	0
ENSG00000144674	GOLGA4	protein_coding	Q13439	0.30757	0.0175258	0.539133	2.48693e-05	0	0	0
ENSG00000144677	CTDSPL	protein_coding	O15194	0.664629	1.71026e-06	0.905644	1.03816e-13	0	0	0
ENSG00000144711	IQSEC1	protein_coding	Q6DN90	0.721095	6.08621e-11	1.2029	3.42455e-28	0	0	0
ENSG00000144712	CAND2	protein_coding	O75155	0.479201	0.000355889	0.340018	0.00584723	0	0	0
ENSG00000145016	RUBCN	protein_coding	Q92622	0.567274	1.79746e-07	0.904227	1.04032e-12	0	0	0
ENSG00000145901	TNIP1	protein_coding	Q15025	0.599867	3.8636e-08	0.564952	7.08855e-07	0	0	0
ENSG00000146063	TRIM41	protein_coding	Q8WV44	0.656674	2.64222e-10	0.80989	1.75425e-14	0	0	0
ENSG00000146067	FAM193B	protein_coding	Q96PV7	0.858149	2.37079e-14	0.955077	4.20947e-14	0	0	0
ENSG00000146083	RNF44	protein_coding	Q7L0R7	1.31736	4.03745e-30	1.30479	1.55327e-25	0	0	0
ENSG00000146350	TBC1D32	protein_coding	Q96NH3	0.784177	6.02088e-07	0.38114	0.0318972	0	0	0
ENSG00000146576	C7orf26	protein_coding	#N/A	1.04347	4.41742e-20	0.788073	3.82134e-11	0	0	0
ENSG00000146670	CDCA5	protein_coding	Q96FF9	0.445571	8.96177e-09	0.310689	0.0121467	0	0	0
ENSG00000146830	GIGYF1	protein_coding	O75420	1.34055	1.94495e-55	1.47206	8.86348e-42	0	0	0
ENSG00000147118	ZNF182	protein_coding	P17025	0.787887	2.16231e-05	0.453391	0.0252057	0	0	0
ENSG00000148331	ASB6	protein_coding	Q9NWX5	0.930782	5.85889e-29	0.757324	1.22519e-16	0	0	0
ENSG00000148334	PTGES2	protein_coding	Q9H7Z7	1.38811	2.01037e-69	0.731758	1.09482e-16	1	0	0
ENSG00000148337	CIZ1	protein_coding	Q9ULV3	0.520324	8.95177e-06	0.526743	1.41085e-07	0	0	0
ENSG00000148341	SH3GLB2	protein_coding	Q9NR46	0.876537	8.68748e-24	0.882995	1.33501e-26	0	0	0
ENSG00000148356	LRSAM1	protein_coding	Q6UWE0	0.642687	2.81328e-09	0.368103	0.00316983	0	0	0
ENSG00000148362	C9orf142	protein_coding	#N/A	1.15924	8.06816e-27	0.775971	1.19507e-10	0	0	0
ENSG00000148384	INPP5E	protein_coding	Q9NRR6	1.45241	6.90852e-61	1.7206	8.91533e-66	0	0	0
ENSG00000148396	SEC16A	protein_coding	O15027	0.449201	1.24294e-07	0.563374	1.32798e-16	0	0	0
ENSG00000148399	DPH7	protein_coding	Q9BTV6	0.58368	8.44305e-12	0.694765	1.31637e-16	0	0	0
ENSG00000148400	NOTCH1	protein_coding	P46531	1.27172	1.15492e-32	0.570379	4.24692e-07	0	0	0
ENSG00000148468	FAM171A1	protein_coding	Q5VUB5	0.502541	8.03334e-09	0.942249	3.2784e-20	0	0	0
ENSG00000148840	PPRC1	protein_coding	Q5VV67	0.522646	4.74769e-07	0.572865	1.4117e-06	0	0	1
ENSG00000148842	CNNM2	protein_coding	Q9H8M5	0.671659	7.29894e-11	0.622371	1.56961e-07	0	0	0
ENSG00000149115	TNKS1BP1	protein_coding	Q9C0C2	0.438066	0.00206245	0.50514	3.04655e-06	0	0	1
ENSG00000149150	SLC43A1	protein_coding	O75387	1.00592	4.63809e-24	0.732895	2.74524e-13	0	0	0
ENSG00000149182	ARFGAP2	protein_coding	Q8N6H7	0.465736	1.42496e-05	0.507823	9.05145e-05	0	0	0
ENSG00000149639	SOGA1	protein_coding	O94964	0.504825	1.98661e-08	1.12138	9.67749e-39	0	0	0
ENSG00000149716	ORAOV1	protein_coding	Q8WV07	0.655515	2.24842e-09	0.560505	5.69053e-06	0	0	0
ENSG00000149782	PLCB3	protein_coding	Q01970	0.652861	6.31042e-05	0.637368	3.08596e-11	0	0	0
ENSG00000149823	VPS51	protein_coding	Q9UID3	0.551867	9.35081e-09	0.452204	2.94999e-07	0	0	0
ENSG00000149930	TAOK2	protein_coding	Q9UL54	0.677021	3.34143e-26	1.0259	1.92697e-37	0	0	0
ENSG00000150403	TMCO3	protein_coding	Q6UWJ1	0.789574	1.29026e-22	0.96588	9.16583e-31	0	0	0
ENSG00000150990	DHX37	protein_coding	Q8IY37	0.67011	1.87605e-18	0.834712	7.53389e-07	0	0	1
ENSG00000151148	UBE3B	protein_coding	Q7Z3V4	0.825271	3.20899e-09	1.14829	3.34949e-16	0	0	0
ENSG00000151240	DIP2C	protein_coding	Q9Y2E4	0.819176	1.12167e-17	1.10481	7.74444e-31	0	0	0
ENSG00000151498	ACAD8	protein_coding	Q9UKU7	1.09377	5.61866e-38	0.778756	2.29404e-11	1	0	0
ENSG00000151553	FAM160B1	protein_coding	#N/A	1.2409	1.12634e-16	0.559954	0.00165939	0	0	0
ENSG00000151849	CENPJ	protein_coding	Q9HC77	0.51853	6.7674e-08	0.608273	2.3172e-06	0	0	0
ENSG00000151914	DST	protein_coding	Q03001	0.391671	0.000505974	0.761326	1.88496e-06	0	0	0
ENSG00000152102	FAM168B	protein_coding	A1KXE4	0.419841	0.00330554	0.997023	1.30791e-11	0	0	0
ENSG00000152192	POU4F1	protein_coding	Q01851	1.24144	5.51855e-48	0.919307	8.42563e-14	0	0	0
ENSG00000152518	ZFP36L2	protein_coding	P47974	0.631125	1.71143e-06	0.364136	0.00582051	0	0	0
ENSG00000153066	TXNDC11	protein_coding	Q6PKC3	0.416751	6.28257e-05	0.337401	0.00453395	0	0	0
ENSG00000153317	ASAP1	protein_coding	Q9ULH1	0.618972	0.00227027	0.897771	2.07387e-11	0	0	1
ENSG00000153443	UBALD1	protein_coding	#N/A	0.794258	2.10547e-09	0.751202	8.77818e-05	0	0	0
ENSG00000153560	UBP1	protein_coding	Q9NZI7	0.428015	7.59656e-06	0.895566	2.53268e-22	0	0	0
ENSG00000153786	ZDHHC7	protein_coding	Q9NXF8	0.925269	2.01433e-18	1.16727	2.25496e-16	0	0	0
ENSG00000153885	KCTD15	protein_coding	Q96SI1	0.469911	0.00384853	0.615669	2.86632e-07	0	0	0
ENSG00000154222	CC2D1B	protein_coding	Q5T0F9	0.642675	1.7948e-09	0.766056	2.2749e-13	0	0	0
ENSG00000154370	TRIM11	protein_coding	Q96F44	0.861294	5.11429e-17	0.592782	3.90977e-06	0	0	0
ENSG00000154803	FLCN	protein_coding	Q8NFG4	1.08957	2.4955e-29	1.10653	5.74484e-30	0	0	0
ENSG00000154945	ANKRD40	protein_coding	Q6AI12	0.604749	8.32106e-09	0.335959	0.00234727	0	0	0
ENSG00000155034	FBXL18	protein_coding	Q96ME1	0.704725	1.88722e-11	0.62746	2.98411e-12	0	0	0
ENSG00000155256	ZFYVE27	protein_coding	Q5T4F4	0.945578	4.24421e-15	0.692149	6.20847e-09	0	0	0
ENSG00000155275	TRMT44	protein_coding	Q8IYL2	0.402837	0.00187602	0.775283	6.47777e-10	0	0	1
ENSG00000155363	MOV10	protein_coding	Q9HCE1	0.59575	7.63724e-09	0.552341	1.04018e-05	0	0	0
ENSG00000155846	PPARGC1B	protein_coding	Q86YN6	0.458689	0.0114051	0.443028	0.00318897	0	0	0
ENSG00000156030	ELMSAN1	protein_coding	Q6PJG2	0.710767	1.63196e-15	0.654831	2.06357e-16	0	0	0
ENSG00000156299	TIAM1	protein_coding	Q13009	0.828204	1.94237e-24	0.85447	4.94528e-23	0	0	0
ENSG00000156521	TYSND1	protein_coding	Q2T9J0	0.766312	5.64057e-12	0.853867	1.13819e-13	1	0	0
ENSG00000156853	ZNF689	protein_coding	Q96CS4	1.4195	7.07236e-07	0.854324	0.000211754	0	0	0
ENSG00000156858	PRR14	protein_coding	Q9BWN1	0.551715	5.53261e-08	0.663749	7.22306e-09	0	0	0
ENSG00000156860	FBRS	protein_coding	Q9HAH7	0.721863	3.4357e-19	0.64514	8.2792e-10	0	0	0
ENSG00000156873	PHKG2	protein_coding	P15735	1.02593	1.91379e-28	0.887848	1.42193e-11	0	0	0
ENSG00000156983	BRPF1	protein_coding	P55201	0.684551	1.0059e-13	0.810462	1.30796e-15	0	0	0
ENSG00000157350	ST3GAL2	protein_coding	Q16842	0.947254	2.76647e-19	1.31108	1.63476e-30	0	0	0
ENSG00000157637	SLC38A10	protein_coding	Q9HBR0	0.795817	1.41445e-14	1.00306	4.85149e-26	0	0	0
ENSG00000157827	FMNL2	protein_coding	Q96PY5	1.14194	5.9853e-14	0.976562	7.80348e-10	0	0	1
ENSG00000157933	SKI	protein_coding	P12755	0.613898	1.30815e-08	1.021	8.12885e-18	0	0	0
ENSG00000157985	AGAP1	protein_coding	Q9UPQ3	0.608255	7.23053e-08	0.786141	1.33403e-06	0	0	0
ENSG00000158062	UBXN11	protein_coding	Q5T124	1.02694	9.7212e-23	1.01655	1.80293e-19	0	0	0
ENSG00000158321	AUTS2	protein_coding	Q8WXX7	0.364762	2.98136e-05	0.598319	1.17685e-12	0	0	0
ENSG00000158669	GPAT4	protein_coding	Q86UL3	0.703065	4.8112e-09	0.426021	0.00377504	0	0	0
ENSG00000158850	B4GALT3	protein_coding	O60512	0.528453	2.44129e-08	0.834242	4.49719e-16	0	0	0
ENSG00000159069	FBXW5	protein_coding	Q969U6	1.23984	1.21855e-19	1.28655	1.50741e-18	0	0	1
ENSG00000159086	PAXBP1	protein_coding	Q9Y5B6	0.44614	1.68819e-06	0.627443	4.76064e-09	0	0	0
ENSG00000159164	SV2A	protein_coding	Q7L0J3	0.40969	0.00101489	0.447184	0.000198412	0	0	0
ENSG00000159363	ATP13A2	protein_coding	Q9NQ11	0.770738	9.1351e-16	0.666889	1.08078e-13	0	0	1
ENSG00000159461	AMFR	protein_coding	Q9UKV5	0.32431	0.000475169	0.636169	2.69931e-14	0	0	0
ENSG00000159692	CTBP1	protein_coding	Q13363	0.998802	1.67751e-12	1.15897	6.10861e-16	0	0	1
ENSG00000160058	BSDC1	protein_coding	#N/A	1.69432	1.99568e-64	1.28759	8.15022e-31	0	0	0
ENSG00000160072	ATAD3B	protein_coding	Q5T9A4	0.7972	1.66503e-07	0.990522	8.33845e-10	1	0	0
ENSG00000160087	UBE2J2	protein_coding	Q8N2K1	0.714073	6.53964e-10	0.588188	1.42802e-11	0	0	0
ENSG00000160113	NR2F6	protein_coding	P10588	1.18751	1.23612e-30	1.17834	2.28638e-30	0	0	0
ENSG00000160193	WDR4	protein_coding	P57081	0.613407	1.26507e-18	0.921516	2.24265e-29	0	0	0
ENSG00000160216	AGPAT3	protein_coding	Q9NRZ7	0.509466	2.58273e-06	0.915049	1.91094e-19	0	0	0
ENSG00000160218	TRAPPC10	protein_coding	P48553	0.589358	2.93653e-07	0.919949	9.07097e-11	0	0	0
ENSG00000160271	RALGDS	protein_coding	Q12967	1.20243	7.54715e-50	1.63249	1.71647e-38	0	0	0
ENSG00000160294	MCM3AP	protein_coding	O60318	0.415747	3.48179e-09	0.73895	6.01317e-14	0	0	0
ENSG00000160298	C21orf58	protein_coding	#N/A	1.03587	3.37487e-20	1.30216	5.83627e-12	0	0	0
ENSG00000160305	DIP2A	protein_coding	Q14689	1.0082	2.88378e-31	1.42186	3.72392e-52	0	0	0
ENSG00000160392	C19orf47	protein_coding	Q8N9M1	0.481128	2.00558e-06	0.610151	2.12577e-09	0	0	0
ENSG00000160447	PKN3	protein_coding	Q6P5Z2	1.75029	4.91864e-31	1.30854	2.01775e-16	0	0	0
ENSG00000160570	DEDD2	protein_coding	Q8WXF8	1.34444	6.34764e-35	0.39261	0.0488843	0	0	0
ENSG00000160584	SIK3	protein_coding	Q9Y2K2	0.426645	1.56794e-06	0.640491	2.03211e-12	0	0	0
ENSG00000160613	PCSK7	protein_coding	Q16549	0.732613	1.02239e-11	0.965597	2.08871e-15	0	0	0
ENSG00000160688	FLAD1	protein_coding	Q8NFF5	0.311132	0.00185271	0.361621	0.000196336	1	0	1
ENSG00000160741	CRTC2	protein_coding	Q53ET0	0.783866	2.14468e-11	0.835287	4.97876e-12	0	0	0
ENSG00000160753	RUSC1	protein_coding	Q9BVN2	0.620383	3.89165e-11	0.628253	6.14484e-08	0	0	0
ENSG00000160796	NBEAL2	protein_coding	Q6ZNJ1	0.717564	4.10538e-09	1.27375	1.6609e-23	0	0	0
ENSG00000160877	NACC1	protein_coding	Q96RE7	0.337676	0.000234055	0.793691	7.73039e-20	0	0	0
ENSG00000160917	CPSF4	protein_coding	O95639	0.574616	2.39694e-09	0.740267	3.27502e-12	0	0	0
ENSG00000160949	TONSL	protein_coding	Q96HA7	1.21518	7.57852e-36	1.38444	6.01451e-70	0	0	0
ENSG00000160953	MUM1	protein_coding	Q2TAK8	0.852246	1.89533e-22	0.617717	2.40941e-11	0	0	0
ENSG00000160957	RECQL4	protein_coding	O94761	1.17985	2.06986e-36	1.331	4.33604e-45	1	0	0
ENSG00000161010	MRNIP	protein_coding	Q6NTE8	0.797	4.65042e-18	0.757047	2.96959e-08	0	0	0
ENSG00000161013	MGAT4B	protein_coding	Q9UQ53	0.709237	1.092e-16	1.15132	1.6529e-43	0	0	0
ENSG00000161091	MFSD12	protein_coding	Q6NUT3	1.05301	2.10094e-26	1.19487	7.99954e-37	0	0	1
ENSG00000161179	YDJC	protein_coding	A8MPS7	0.761023	1.71987e-10	0.546252	2.33149e-11	0	0	0
ENSG00000161202	DVL3	protein_coding	Q92997	0.516025	6.61422e-08	0.660675	1.91323e-08	0	0	0
ENSG00000161682	FAM171A2	protein_coding	A8MVW0	1.07212	9.13908e-21	1.22645	1.49587e-18	0	0	0
ENSG00000161692	DBF4B	protein_coding	Q8NFT6	0.772354	2.26344e-17	0.908981	2.01167e-18	0	0	0
ENSG00000161714	PLCD3	protein_coding	Q8N3E9	0.913061	4.87601e-23	0.964512	6.38018e-20	0	0	0
ENSG00000161904	LEMD2	protein_coding	Q8NC56	0.803248	4.93889e-27	0.413861	0.000171882	0	0	0
ENSG00000161996	WDR90	protein_coding	Q96KV7	1.19034	1.13418e-25	1.57079	9.9518e-40	0	0	1
ENSG00000162066	AMDHD2	protein_coding	Q9Y303	1.37492	3.47995e-16	1.01549	5.96312e-08	0	0	0
ENSG00000162104	ADCY9	protein_coding	O60503	0.362649	0.00130549	0.740997	7.44777e-06	0	0	0
ENSG00000162298	SYVN1	protein_coding	Q86TM6	0.593763	1.94262e-10	0.554107	9.78119e-06	0	0	1
ENSG00000162337	LRP5	protein_coding	O75197	0.729272	3.58278e-17	0.963389	3.30949e-22	0	0	0
ENSG00000162413	KLHL21	protein_coding	Q9UJP4	0.476264	0.000121509	0.597663	1.86594e-06	0	0	1
ENSG00000162430	SELENON	protein_coding	Q9NZV5	0.677202	8.13208e-05	0.727113	3.68085e-06	0	0	0
ENSG00000162613	FUBP1	protein_coding	Q96AE4	0.674926	5.57156e-11	0.602807	3.43621e-05	0	0	1
ENSG00000162714	ZNF496	protein_coding	Q96IT1	0.761164	9.34736e-14	0.98606	3.58216e-16	0	0	0
ENSG00000162836	ACP6	protein_coding	Q9NPH0	0.341049	0.00325732	0.544264	2.81019e-05	1	0	0
ENSG00000163161	ERCC3	protein_coding	P19447	0.332135	0.000807794	0.412319	1.37072e-05	0	0	0
ENSG00000163162	RNF149	protein_coding	Q8NC42	0.425535	0.000327787	0.406894	3.43661e-05	0	0	0
ENSG00000163660	CCNL1	protein_coding	Q9UK58	0.643649	1.18926e-07	1.15849	6.26439e-38	0	0	0
ENSG00000163812	ZDHHC3	protein_coding	Q9NYG2	0.333181	0.0137548	0.444702	0.00904514	0	0	0
ENSG00000163820	FYCO1	protein_coding	Q9BQS8	0.434316	0.000173558	0.762014	3.21109e-11	0	0	0
ENSG00000163870	TPRA1	protein_coding	Q86W33	1.34048	8.07973e-42	1.00353	6.29687e-15	0	0	0
ENSG00000163930	BAP1	protein_coding	Q92560	0.800209	7.69618e-18	1.13389	1.30758e-28	0	0	0
ENSG00000163961	RNF168	protein_coding	Q8IYW5	0.316078	0.0293362	0.454279	0.0072694	0	0	0
ENSG00000164054	SHISA5	protein_coding	Q8N114	0.582736	1.86891e-06	0.541766	3.98026e-07	0	0	0
ENSG00000164068	RNF123	protein_coding	Q5XPI4	0.736659	4.12259e-18	0.842364	2.15453e-15	0	0	0
ENSG00000164080	RAD54L2	protein_coding	Q9Y4B4	0.393712	3.80005e-07	0.588375	9.22887e-11	0	0	0
ENSG00000164086	DUSP7	protein_coding	Q16829	0.572462	8.16025e-12	0.970111	6.24187e-20	0	0	0
ENSG00000164087	POC1A	protein_coding	Q8NBT0	0.642801	2.35644e-08	0.527124	9.40022e-07	0	0	0
ENSG00000164535	DAGLB	protein_coding	Q8NCG7	0.504333	0.000210791	0.434475	0.000117066	0	0	0
ENSG00000164778	EN2	protein_coding	P19622	0.470445	0.00200349	0.854212	4.50105e-14	0	0	1
ENSG00000164880	INTS1	protein_coding	Q8N201	0.861637	2.03367e-34	1.04228	6.74622e-52	0	0	0
ENSG00000164889	SLC4A2	protein_coding	P04920	0.853501	8.62274e-21	0.714589	3.91114e-12	0	0	0
ENSG00000164896	FASTK	protein_coding	Q14296	1.52034	2.02879e-77	1.41653	1.86841e-37	1	0	1
ENSG00000164897	TMUB1	protein_coding	Q9BVT8	1.0796	1.09239e-23	0.698678	2.21037e-13	0	0	0
ENSG00000164970	FAM219A	protein_coding	#N/A	0.489842	0.00442969	0.783888	6.73248e-09	0	0	0
ENSG00000165138	ANKS6	protein_coding	Q68DC2	0.875723	4.12766e-19	1.24563	6.48412e-21	0	0	0
ENSG00000165238	WNK2	protein_coding	Q9Y3S1	0.687415	1.4204e-06	1.00505	5.99091e-14	0	0	0
ENSG00000165271	NOL6	protein_coding	Q9H6R4	0.558716	2.46721e-13	0.894708	2.74317e-10	0	0	0
ENSG00000165282	PIGO	protein_coding	Q8TEQ8	0.493698	4.2483e-08	0.378036	1.18834e-05	0	0	0
ENSG00000165389	SPTSSA	protein_coding	Q969W0	1.2859	1.06715e-29	0.358874	0.00160333	0	0	1
ENSG00000165458	INPPL1	protein_coding	O15357	0.548615	1.68783e-10	0.916782	8.62471e-23	0	0	0
ENSG00000165632	TAF3	protein_coding	Q5VWG9	1.24295	4.5625e-20	1.01045	1.95558e-06	0	0	0
ENSG00000165661	QSOX2	protein_coding	Q6ZRP7	0.493435	1.12602e-08	0.515071	3.11522e-09	0	0	0
ENSG00000165669	FAM204A	protein_coding	Q9H8W3	0.310199	0.00342949	0.428593	0.000159138	0	0	1
ENSG00000165684	SNAPC4	protein_coding	Q5SXM2	0.990424	4.20622e-40	1.17455	9.89226e-58	0	0	0
ENSG00000165689	SDCCAG3	protein_coding	Q96C92	0.793068	5.81906e-27	0.995521	1.092e-36	0	0	0
ENSG00000165699	TSC1	protein_coding	Q92574	0.344346	0.00503528	0.571853	0.00044595	0	0	0
ENSG00000165716	FAM69B	protein_coding	Q5VUD6	0.539779	4.19691e-09	0.950981	1.29868e-22	0	0	0
ENSG00000165782	TMEM55B	protein_coding	#N/A	0.60798	0.000246258	0.547865	0.000309069	0	0	0
ENSG00000165802	NSMF	protein_coding	Q6X4W1	0.963796	3.42909e-30	1.46349	2.60367e-37	0	0	0
ENSG00000165914	TTC7B	protein_coding	Q86TV6	0.558616	6.23443e-10	0.741003	1.58118e-16	0	0	0
ENSG00000166197	NOLC1	protein_coding	Q14978	0.905247	9.79869e-17	0.987328	4.41376e-18	0	0	0
ENSG00000166348	USP54	protein_coding	Q70EL1	0.487778	1.60346e-05	0.696671	2.87092e-10	0	0	0
ENSG00000166402	TUB	protein_coding	P50607	0.497116	0.00132437	1.19517	1.33113e-14	0	0	0
ENSG00000166532	RIMKLB	protein_coding	Q9ULI2	0.560716	0.00411952	0.687445	9.22926e-05	0	0	0
ENSG00000166716	ZNF592	protein_coding	Q92610	0.433959	0.000401571	0.592114	4.50271e-06	0	0	0
ENSG00000166813	KIF7	protein_coding	Q2M1P5	1.03125	1.81366e-34	1.02411	3.73493e-29	0	0	0
ENSG00000166965	RCCD1	protein_coding	A6NED2	0.751381	3.80164e-14	0.770753	2.20461e-09	0	0	0
ENSG00000167114	SLC27A4	protein_coding	Q6P1M0	0.402182	3.51341e-05	0.690336	8.03736e-13	0	0	0
ENSG00000167123	CERCAM	protein_coding	Q5T4B2	0.573153	7.27949e-09	0.717468	1.20804e-11	0	0	1
ENSG00000167202	TBC1D2B	protein_coding	Q9UPU7	0.535323	6.80627e-10	0.637963	1.85714e-08	0	0	1
ENSG00000167291	TBC1D16	protein_coding	Q8TBP0	0.491909	4.67447e-05	1.0263	5.75873e-13	0	0	0
ENSG00000167378	IRGQ	protein_coding	Q8WZA9	0.832342	8.55502e-09	0.865041	2.91529e-12	0	0	0
ENSG00000167395	ZNF646	protein_coding	O15015	0.623726	6.99514e-06	0.750331	1.38899e-08	0	0	0
ENSG00000167470	MIDN	protein_coding	Q504T8	0.803084	6.36873e-19	0.941588	6.71802e-14	0	0	0
ENSG00000167522	ANKRD11	protein_coding	Q6UB99	0.499902	9.07076e-11	0.991668	1.39811e-23	0	0	0
ENSG00000167548	KMT2D	protein_coding	O14686	0.374564	0.000927902	1.14428	7.92188e-45	0	0	0
ENSG00000167566	NCKAP5L	protein_coding	Q9HCH0	0.857776	9.94561e-18	0.995261	2.36871e-28	0	0	0
ENSG00000167671	UBXN6	protein_coding	Q9BZV1	0.721149	1.766e-10	1.00079	4.63686e-21	0	0	0
ENSG00000167674	CTB-50L17.10	protein_coding	#N/A	0.494257	1.47064e-16	0.334358	1.82272e-05	0	0	0
ENSG00000167685	ZNF444	protein_coding	Q8N0Y2	0.977142	6.02506e-12	0.723586	6.57723e-06	0	0	0
ENSG00000167702	KIFC2	protein_coding	Q96AC6	2.1842	8.91605e-67	1.56123	1.94455e-15	0	0	0
ENSG00000167962	ZNF598	protein_coding	Q86UK7	0.886392	2.20945e-15	0.834222	1.91045e-13	0	0	0
ENSG00000167967	E4F1	protein_coding	Q66K89	0.883133	5.09319e-15	0.889904	8.49722e-25	0	0	0
ENSG00000167972	ABCA3	protein_coding	Q99758	0.777279	1.15604e-14	1.12329	6.8861e-29	0	0	0
ENSG00000168028	RPSA	protein_coding	P08865	1.40462	1.82468e-12	0.945095	1.07112e-06	0	0	1
ENSG00000168056	LTBP3	protein_coding	Q9NS15	1.26065	3.63301e-38	0.791689	6.10873e-14	0	0	0
ENSG00000168264	IRF2BP2	protein_coding	Q7Z5L9	0.739343	5.01842e-12	0.84515	8.13537e-09	0	0	1
ENSG00000168268	NT5DC2	protein_coding	Q9H857	0.306973	1.25478e-05	0.436795	1.05229e-06	1	0	0
ENSG00000168763	CNNM3	protein_coding	Q8NE01	0.92844	5.25167e-23	0.846293	1.11704e-13	0	1	0
ENSG00000168778	TCTN2	protein_coding	Q96GX1	0.44511	0.000768175	0.502929	9.72816e-08	0	0	1
ENSG00000168924	LETM1	protein_coding	O95202	0.698016	7.10514e-14	0.574862	5.78979e-11	1	0	1
ENSG00000169057	MECP2	protein_coding	P51608	1.22456	1.65982e-18	0.563161	0.0191145	0	0	0
ENSG00000169180	XPO6	protein_coding	Q96QU8	0.602341	5.12721e-18	0.802882	1.06874e-18	0	0	0
ENSG00000169221	TBC1D10B	protein_coding	Q4KMP7	0.601446	2.87996e-09	0.589073	1.61518e-10	0	0	0
ENSG00000169718	DUS1L	protein_coding	Q6P1R4	0.79702	3.56483e-35	0.992939	2.29072e-21	0	0	0
ENSG00000169914	OTUD3	protein_coding	Q5T2D3	0.54142	4.77742e-07	0.706526	8.27692e-09	0	0	0
ENSG00000169919	GUSB	protein_coding	P08236	0.520109	3.56414e-06	0.39983	0.000166515	0	0	0
ENSG00000169957	ZNF768	protein_coding	Q9H5H4	0.428929	0.000443556	0.451093	0.000123154	0	0	0
ENSG00000169992	NLGN2	protein_coding	Q8NFZ4	0.939824	1.00422e-16	1.29952	4.02697e-24	0	0	0
ENSG00000170004	CHD3	protein_coding	Q12873	1.02091	2.00035e-11	0.774032	0.000574104	0	0	0
ENSG00000170037	CNTROB	protein_coding	Q8N137	0.846044	8.59419e-16	1.07199	1.02622e-18	0	0	0
ENSG00000170100	ZNF778	protein_coding	Q96MU6	1.42622	1.67438e-35	1.04929	6.82313e-15	0	0	0
ENSG00000170260	ZNF212	protein_coding	Q9UDV6	0.685175	1.38215e-13	0.382464	1.19824e-05	0	0	0
ENSG00000170265	ZNF282	protein_coding	Q9UDV7	0.712407	1.73268e-12	0.573434	1.40897e-08	0	0	0
ENSG00000170525	PFKFB3	protein_coding	Q16875	0.873926	1.35427e-14	0.500028	0.000204603	0	0	0
ENSG00000170638	TRABD	protein_coding	#N/A	0.91206	1.16743e-19	0.846606	5.70661e-15	0	0	0
ENSG00000171206	TRIM8	protein_coding	Q9BZR9	0.614966	3.22363e-06	0.883313	2.0421e-11	0	0	0
ENSG00000171246	NPTX1	protein_coding	Q15818	0.885151	8.86144e-16	0.546737	5.62682e-07	0	0	0
ENSG00000171298	GAA	protein_coding	P10253	1.01093	2.34861e-37	0.767824	4.79313e-25	0	0	1
ENSG00000171307	ZDHHC16	protein_coding	Q969W1	0.395774	0.00259021	0.557917	2.88246e-05	0	0	1
ENSG00000171456	ASXL1	protein_coding	Q8IXJ9	0.520113	6.22802e-07	0.312971	0.00710458	0	0	0
ENSG00000171634	BPTF	protein_coding	Q12830	0.524729	0.000752043	0.448518	0.0120146	0	0	0
ENSG00000172216	CEBPB	protein_coding	P17676	0.70493	1.38536e-12	0.334071	0.00177029	0	0	0
ENSG00000172432	GTPBP2	protein_coding	Q9BX10	0.728917	1.94303e-15	1.09993	4.47782e-27	0	0	0
ENSG00000172534	HCFC1	protein_coding	P51610	0.481001	0.000586835	0.699014	2.51396e-08	0	0	0
ENSG00000172890	NADSYN1	protein_coding	Q6IA69	0.574634	7.63422e-06	0.779182	1.97608e-13	0	0	0
ENSG00000172943	PHF8	protein_coding	Q9UPP1	0.464412	2.3082e-18	0.603777	7.96178e-05	0	0	0
ENSG00000173020	GRK2	protein_coding	P25098	1.19329	6.04683e-28	1.31523	5.933e-43	0	0	0
ENSG00000173064	HECTD4	protein_coding	Q9Y4D8	0.735561	2.56776e-16	1.31618	1.4003e-46	0	0	0
ENSG00000173120	KDM2A	protein_coding	Q9Y2K7	0.37104	0.000146199	0.684918	2.57224e-12	0	0	0
ENSG00000173209	AHSA2	protein_coding	#N/A	1.15605	3.13054e-15	1.17701	6.09045e-17	0	0	0
ENSG00000173272	MZT2A	protein_coding	Q6P582	1.97465	8.5157e-57	0.752772	1.69437e-07	0	0	0
ENSG00000173327	MAP3K11	protein_coding	Q16584	0.697337	3.79182e-13	1.07624	5.93805e-21	0	0	0
ENSG00000173457	PPP1R14B	protein_coding	Q96C90	1.34069	1.30085e-17	0.534346	3.09941e-06	0	0	0
ENSG00000173540	GMPPB	protein_coding	Q9Y5P6	0.532296	3.84378e-05	0.402955	0.000221682	0	0	0
ENSG00000173575	CHD2	protein_coding	O14647	0.891115	9.97266e-12	1.26144	1.11177e-14	0	0	0
ENSG00000173638	SLC19A1	protein_coding	P41440	0.680996	5.62991e-12	0.601237	1.10864e-09	0	0	0
ENSG00000173757	STAT5B	protein_coding	P51692	0.608413	1.4487e-13	0.659168	3.39118e-10	0	0	0
ENSG00000173889	PHC3	protein_coding	Q8NDX5	0.666245	7.36752e-09	0.786764	7.82628e-07	0	0	0
ENSG00000173898	SPTBN2	protein_coding	O15020	0.916078	6.95184e-20	1.17092	1.68753e-25	0	0	0
ENSG00000174233	ADCY6	protein_coding	O43306	0.746449	2.20679e-15	0.984859	6.85097e-20	0	0	0
ENSG00000174669	SLC29A2	protein_coding	Q14542	0.980694	1.18791e-11	1.28941	7.24295e-15	0	0	1
ENSG00000174672	BRSK2	protein_coding	Q8IWQ3	0.893767	1.30034e-15	1.08138	3.83052e-34	0	0	0
ENSG00000174996	KLC2	protein_coding	Q9H0B6	1.10699	2.90272e-27	0.760914	1.02075e-14	0	0	0
ENSG00000175137	SH3BP5L	protein_coding	Q7L8J4	1.1267	2.71755e-25	1.07562	2.29512e-12	0	0	0
ENSG00000175197	DDIT3	protein_coding	P35638	0.924366	7.30996e-24	0.675884	8.88449e-08	0	0	0
ENSG00000175309	PHYKPL	protein_coding	Q8IUZ5	0.73279	2.03669e-10	1.10111	6.0758e-14	0	0	0
ENSG00000175414	ARL10	protein_coding	Q8N8L6	0.444351	0.00274798	0.597484	3.29954e-06	0	0	0
ENSG00000175634	RPS6KB2	protein_coding	Q9UBS0	1.68152	3.88338e-59	1.30227	3.28328e-25	0	0	1
ENSG00000175826	CTDNEP1	protein_coding	O95476	0.523552	9.19549e-05	0.748864	1.86126e-06	0	0	0
ENSG00000176155	CCDC57	protein_coding	Q2TAC2	1.43607	1.50323e-43	1.71855	3.67931e-40	0	0	0
ENSG00000176248	ANAPC2	protein_coding	Q9UJX6	1.07975	6.6599e-19	0.846441	1.2379e-21	0	0	0
ENSG00000176619	LMNB2	protein_coding	Q03252	0.595944	3.64044e-26	0.356753	2.24985e-08	0	0	0
ENSG00000176715	ACSF3	protein_coding	Q4G176	0.953252	2.62013e-24	0.631259	2.08678e-10	1	0	0
ENSG00000176915	ANKLE2	protein_coding	Q86XL3	0.328088	4.52978e-08	0.519775	2.25216e-09	0	0	0
ENSG00000177030	DEAF1	protein_coding	O75398	0.98095	1.08715e-34	1.11501	3.42707e-41	0	0	1
ENSG00000177051	FBXO46	protein_coding	Q6PJ61	0.629043	9.71624e-06	0.768569	7.18027e-07	0	0	0
ENSG00000177084	POLE	protein_coding	Q07864	0.478757	9.65247e-14	0.81286	1.6127e-11	0	0	0
ENSG00000177169	ULK1	protein_coding	O75385	1.24724	1.26872e-35	1.45831	1.0081e-61	0	0	0
ENSG00000177192	PUS1	protein_coding	Q9Y606	0.753699	1.94167e-09	0.582324	5.24019e-06	1	0	0
ENSG00000177225	PDDC1	protein_coding	#N/A	0.842659	1.53435e-22	0.888534	1.18674e-20	0	0	0
ENSG00000177239	MAN1B1	protein_coding	Q9UKM7	0.387309	2.0787e-05	0.40684	9.14081e-05	0	0	0
ENSG00000177283	FZD8	protein_coding	Q9H461	0.48313	7.06428e-05	0.582848	0.000171565	0	0	0
ENSG00000177302	TOP3A	protein_coding	Q13472	0.452659	2.17452e-12	0.567051	5.57479e-16	1	0	0
ENSG00000177542	SLC25A22	protein_coding	Q9H936	0.720624	4.3451e-10	0.395976	0.000275568	1	0	1
ENSG00000177595	PIDD1	protein_coding	Q9HB75	1.59498	3.15092e-51	1.65176	5.236e-67	0	0	0
ENSG00000177728	TMEM94	protein_coding	Q12767	0.672055	5.99059e-10	0.727251	8.72252e-12	0	0	0
ENSG00000177732	SOX12	protein_coding	O15370	0.908993	2.05765e-13	0.83977	5.74585e-11	0	0	0
ENSG00000177963	RIC8A	protein_coding	Q9NPQ8	0.633478	5.04692e-11	0.405032	1.16436e-06	0	0	1
ENSG00000178188	SH2B1	protein_coding	Q9NRF2	1.11273	2.80316e-17	1.29166	6.0281e-22	0	0	0
ENSG00000178209	PLEC	protein_coding	Q15149	0.813721	3.5811e-24	1.21991	9.12471e-44	0	0	0
ENSG00000178381	ZFAND2A	protein_coding	Q8N6M9	1.5178	4.29212e-30	0.384957	0.00473934	0	0	0
ENSG00000178950	GAK	protein_coding	O14976	0.458085	1.65388e-09	0.655595	1.38081e-17	0	0	0
ENSG00000178951	ZBTB7A	protein_coding	O95365	0.987972	6.088e-19	0.935642	1.98315e-19	0	0	0
ENSG00000179094	PER1	protein_coding	O15534	0.852949	1.14328e-17	0.971087	1.56296e-23	0	0	0
ENSG00000179134	SAMD4B	protein_coding	Q5PRF9	0.706736	3.05155e-12	1.06987	6.40733e-35	0	0	0
ENSG00000179348	GATA2	protein_coding	P23769	0.85837	4.52448e-13	0.815357	4.77264e-14	0	0	0
ENSG00000179364	PACS2	protein_coding	Q86VP3	0.92811	2.74111e-07	1.24763	5.4312e-15	0	0	0
ENSG00000179526	SHARPIN	protein_coding	Q9H0F6	1.48317	1.71665e-48	1.10745	7.58685e-32	0	0	0
ENSG00000179981	TSHZ1	protein_coding	Q6ZSZ6	0.386231	0.00810241	0.577503	0.00307596	0	0	0
ENSG00000180447	GAS1	protein_coding	P54826	0.46437	6.35188e-07	0.965867	9.46357e-25	0	0	0
ENSG00000181027	FKRP	protein_coding	Q9H9S5	1.13749	1.59963e-16	1.2185	2.81027e-16	0	0	0
ENSG00000181045	SLC26A11	protein_coding	Q86WA9	0.934177	7.39353e-07	1.24	2.79515e-13	0	0	0
ENSG00000181090	EHMT1	protein_coding	Q9H9B1	0.72888	2.82858e-12	0.429154	1.55064e-06	0	0	0
ENSG00000181220	ZNF746	protein_coding	Q6NUN9	0.917815	1.9433e-26	1.08922	2.9647e-32	0	0	1
ENSG00000181523	SGSH	protein_coding	P51688	0.910363	1.42432e-22	0.843015	5.41337e-20	0	0	0
ENSG00000181588	MEX3D	protein_coding	Q86XN8	1.00677	8.33447e-12	1.28903	1.15661e-23	0	0	0
ENSG00000181873	IBA57	protein_coding	Q5T440	0.597617	8.06709e-10	0.649217	7.3777e-10	1	0	0
ENSG00000182087	TMEM259	protein_coding	Q4ZIN3	1.81553	3.41853e-61	1.23457	1.01931e-19	0	0	1
ENSG00000182095	TNRC18	protein_coding	O15417	0.780352	3.71669e-30	1.33384	5.35719e-63	0	0	0
ENSG00000182173	TSEN54	protein_coding	Q7Z6J9	1.0928	9.70258e-22	1.24865	6.17916e-26	0	0	0
ENSG00000182197	EXT1	protein_coding	Q16394	0.427062	0.000203859	0.721428	1.4135e-08	0	0	0
ENSG00000182378	PLCXD1	protein_coding	Q9NUJ7	0.801584	9.94929e-16	0.707428	5.6459e-13	0	0	0
ENSG00000182446	NPLOC4	protein_coding	Q8TAT6	0.528892	1.37051e-07	0.499657	1.0349e-10	0	0	0
ENSG00000182473	EXOC7	protein_coding	Q9UPT5	0.496237	1.77839e-13	0.446678	2.97635e-12	0	0	1
ENSG00000182606	TRAK1	protein_coding	Q9UPV9	0.843268	2.97943e-16	1.13724	1.35454e-19	0	0	0
ENSG00000182670	TTC3	protein_coding	P53804	0.317085	0.0055347	0.800751	1.27908e-09	0	0	0
ENSG00000182858	ALG12	protein_coding	Q9BV10	0.424243	0.000363975	0.74656	4.62085e-11	0	0	0
ENSG00000182903	ZNF721	protein_coding	Q8TF20	0.515398	0.00415532	0.597924	0.000273207	0	0	0
ENSG00000182979	MTA1	protein_coding	Q13330	1.61335	1.03202e-55	1.22048	5.48385e-18	0	0	0
ENSG00000183258	DDX41	protein_coding	Q9UJV9	0.567728	1.43178e-07	0.695854	9.91002e-12	0	0	0
ENSG00000183421	RIPK4	protein_coding	P57078	0.382959	0.000269418	0.398441	0.0350134	0	0	0
ENSG00000183718	TRIM52	protein_coding	Q96A61	0.921831	2.53896e-11	1.13259	1.20276e-11	0	0	0
ENSG00000183741	CBX6	protein_coding	O95503	0.405843	5.58472e-11	0.705409	2.68262e-17	0	0	0
ENSG00000183779	ZNF703	protein_coding	Q9H7S9	0.808278	2.10409e-10	0.626658	7.36545e-11	0	0	0
ENSG00000183853	KIRREL	protein_coding	Q96J84	0.611078	1.44131e-05	0.337591	0.0377137	0	0	0
ENSG00000183856	IQGAP3	protein_coding	Q86VI3	0.739209	4.33785e-25	0.745329	4.14874e-09	0	0	0
ENSG00000184014	DENND5A	protein_coding	Q6IQ26	0.570069	1.05191e-08	1.16594	1.30234e-35	0	0	0
ENSG00000184058	TBX1	protein_coding	O43435	0.709367	0.000478934	0.601783	7.24088e-05	0	0	1
ENSG00000184205	TSPYL2	protein_coding	Q9H2G4	0.605217	1.87927e-07	0.750182	1.79013e-13	0	0	0
ENSG00000184216	IRAK1	protein_coding	P51617	0.977906	7.8098e-40	1.4335	3.63889e-48	0	0	0
ENSG00000184465	WDR27	protein_coding	A2RRH5	0.698724	1.99274e-11	1.31272	2.00384e-28	0	0	0
ENSG00000184677	ZBTB40	protein_coding	Q9NUA8	0.448812	9.75001e-06	0.439296	1.7766e-05	0	0	0
ENSG00000184863	RBM33	protein_coding	Q96EV2	0.32436	8.57965e-06	0.647273	8.17169e-18	0	0	0
ENSG00000184916	JAG2	protein_coding	Q9Y219	2.03344	2.88572e-88	1.47301	9.74241e-30	0	0	0
ENSG00000185024	BRF1	protein_coding	Q92994	0.522512	7.12821e-07	0.559985	3.4569e-12	0	0	0
ENSG00000185122	HSF1	protein_coding	Q00613	0.543124	2.52815e-06	1.01614	5.89872e-21	0	0	0
ENSG00000185163	DDX51	protein_coding	Q8N8A6	1.38665	2.38111e-53	1.24252	5.849e-51	0	0	0
ENSG00000185219	ZNF445	protein_coding	P59923	0.678234	2.32307e-06	0.893005	8.08457e-08	0	0	0
ENSG00000185252	ZNF74	protein_coding	Q16587	0.494814	7.83709e-05	1.02886	3.7674e-17	0	0	0
ENSG00000185324	CDK10	protein_coding	Q15131	1.25836	3.15418e-28	1.31714	3.60328e-31	0	0	0
ENSG00000185504	FAAP100	protein_coding	Q0VG06	1.36531	8.18643e-47	1.34466	6.99695e-62	0	0	0
ENSG00000185619	PCGF3	protein_coding	Q3KNV8	0.339496	0.00916442	0.855178	5.38014e-14	0	0	0
ENSG00000185697	MYBL1	protein_coding	P10243	0.337295	0.0138183	0.813306	2.1373e-08	0	0	0
ENSG00000185800	DMWD	protein_coding	Q09019	1.08478	5.6432e-21	1.35576	3.3535e-28	0	0	0
ENSG00000185818	NAT8L	protein_coding	Q8N9F0	0.64594	7.94033e-07	0.902933	8.94172e-17	0	0	0
ENSG00000185920	PTCH1	protein_coding	Q13635	0.710684	3.18695e-09	1.24515	4.90865e-19	0	0	0
ENSG00000185963	BICD2	protein_coding	Q8TD16	0.552819	1.37253e-12	0.514827	1.52139e-08	0	0	0
ENSG00000186111	PIP5K1C	protein_coding	O60331	0.956865	1.48841e-27	1.03016	2.6703e-20	0	0	0
ENSG00000186185	KIF18B	protein_coding	Q86Y91	0.96619	3.54164e-26	0.78202	4.79552e-19	0	0	0
ENSG00000186416	NKRF	protein_coding	O15226	0.749129	1.2681e-11	0.612356	4.93083e-08	0	0	0
ENSG00000186635	ARAP1	protein_coding	Q96P48	0.709735	6.74714e-22	0.791527	1.45966e-25	0	0	0
ENSG00000186716	BCR	protein_coding	P11274	0.873426	2.43438e-30	1.19696	7.03548e-34	0	0	0
ENSG00000186866	POFUT2	protein_coding	Q9Y2G5	0.994905	8.25822e-24	0.598026	1.97181e-09	0	0	0
ENSG00000187531	SIRT7	protein_coding	Q9NRC8	1.06383	1.03267e-32	0.725171	5.31914e-14	0	0	0
ENSG00000187605	TET3	protein_coding	O43151	0.513527	5.16275e-05	1.2051	3.52545e-23	0	0	0
ENSG00000187634	SAMD11	protein_coding	Q96NU1	0.928616	2.48707e-25	0.920418	5.25907e-26	0	0	1
ENSG00000187741	FANCA	protein_coding	O15360	0.696632	7.97442e-10	0.869068	4.47863e-15	0	0	0
ENSG00000187764	SEMA4D	protein_coding	Q92854	0.408516	9.70952e-05	0.84734	1.75033e-10	0	0	0
ENSG00000187775	DNAH17	protein_coding	Q9UFH2	0.615111	1.32288e-06	1.84315	0.0154956	0	0	0
ENSG00000187954	CYHR1	protein_coding	Q6ZMK1	1.07358	6.63274e-38	1.18818	8.00386e-32	0	0	0
ENSG00000188130	MAPK12	protein_coding	P53778	1.5264	7.65596e-38	1.24253	1.15731e-23	0	0	1
ENSG00000188157	AGRN	protein_coding	O00468	0.959767	2.13273e-25	0.665734	4.01624e-17	0	0	0
ENSG00000188290	HES4	protein_coding	Q9HCC6	0.910051	1.18991e-17	1.21355	4.85613e-18	0	0	0
ENSG00000188735	TMEM120B	protein_coding	A0PK00	0.976879	1.12479e-10	0.878721	8.71567e-10	0	0	0
ENSG00000188786	MTF1	protein_coding	Q14872	0.55107	7.92825e-06	0.737029	4.06105e-09	0	0	0
ENSG00000188827	SLX4	protein_coding	Q8IY92	0.98769	4.75429e-17	1.14542	9.01101e-23	0	0	0
ENSG00000188895	MSL1	protein_coding	Q68DK7	0.986747	1.47613e-17	1.04592	2.40304e-19	0	0	0
ENSG00000188986	NELFB	protein_coding	Q8WX92	0.355405	0.00484143	0.530226	5.96733e-08	0	0	0
ENSG00000189007	ADAT2	protein_coding	Q7Z6V5	0.305359	0.0166438	0.77654	3.94848e-09	0	0	0
ENSG00000196123	KIAA0895L	protein_coding	#N/A	0.39439	0.0137616	0.685302	1.18277e-09	0	0	0
ENSG00000196182	STK40	protein_coding	Q8N2I9	0.855365	1.59786e-19	1.19087	1.01466e-29	0	0	0
ENSG00000196187	TMEM63A	protein_coding	O94886	1.35764	4.07279e-30	1.34698	3.35608e-25	0	0	0
ENSG00000196313	POM121	protein_coding	Q96HA1	0.419693	1.00915e-07	0.401582	1.4144e-05	0	0	0
ENSG00000196365	LONP1	protein_coding	P36776	0.678796	6.56214e-21	0.75737	1.04958e-15	1	0	0
ENSG00000196369	SRGAP2B	protein_coding	P0DMP2	1.10033	5.73695e-06	1.25523	1.34466e-06	0	0	1
ENSG00000196378	ZNF34	protein_coding	Q8IZ26	2.16614	8.14904e-39	2.34562	1.7783e-28	0	0	0
ENSG00000196405	EVL	protein_coding	Q9UI08	0.949949	5.39011e-16	1.3434	6.21261e-28	0	0	0
ENSG00000196411	EPHB4	protein_coding	P54760	0.9758	2.19524e-22	1.15193	2.63583e-21	0	0	0
ENSG00000196498	NCOR2	protein_coding	Q9Y618	1.10646	9.77456e-21	1.30102	5.10715e-25	0	0	0
ENSG00000196535	MYO18A	protein_coding	Q92614	0.686371	3.22744e-09	0.828632	2.43012e-19	0	0	0
ENSG00000196547	MAN2A2	protein_coding	P49641	1.00972	1.12498e-17	1.39772	2.90167e-30	0	0	1
ENSG00000196576	PLXNB2	protein_coding	O15031	0.770384	3.82995e-16	1.15168	2.43211e-39	0	0	0
ENSG00000196584	XRCC2	protein_coding	O43543	0.719681	3.67745e-14	0.977006	1.78738e-12	0	0	0
ENSG00000196588	MKL1	protein_coding	Q969V6	0.705216	2.28612e-12	0.32621	0.000223263	0	0	1
ENSG00000196628	TCF4	protein_coding	P15884	0.457154	2.97269e-05	0.321743	0.00785029	0	0	1
ENSG00000196642	RABL6	protein_coding	Q3YEC7	1.26782	2.23686e-21	1.15143	3.46757e-13	0	0	0
ENSG00000196652	ZKSCAN5	protein_coding	Q9Y2L8	0.301688	0.0160676	0.764767	2.61541e-13	0	0	0
ENSG00000196700	ZNF512B	protein_coding	Q96KM6	0.965378	3.98314e-31	0.983829	1.42238e-15	0	0	0
ENSG00000197037	ZSCAN25	protein_coding	Q6NSZ9	0.363296	0.000883364	0.742547	7.75743e-11	0	0	0
ENSG00000197063	MAFG	protein_coding	O15525	1.08098	8.51017e-24	1.60096	5.37296e-46	0	0	0
ENSG00000197136	PCNX3	protein_coding	Q9H6A9	1.18826	1.16001e-32	1.5308	5.34619e-62	0	0	0
ENSG00000197150	ABCB8	protein_coding	Q9NUT2	0.747946	6.47314e-16	0.680992	2.78512e-11	1	0	0
ENSG00000197226	TBC1D9B	protein_coding	Q66K14	0.798718	1.41183e-27	0.837691	1.51812e-29	0	0	0
ENSG00000197256	KANK2	protein_coding	Q63ZY3	0.623509	2.48757e-07	0.324752	0.000882616	0	0	0
ENSG00000197324	LRP10	protein_coding	Q7Z4F1	0.324623	0.00713459	0.483177	1.52418e-05	0	0	0
ENSG00000197586	ENTPD6	protein_coding	O75354	0.642072	1.24254e-10	0.74481	3.61052e-14	0	0	1
ENSG00000197724	PHF2	protein_coding	O75151	0.975507	3.2952e-15	1.14009	2.75707e-48	0	0	0
ENSG00000197858	GPAA1	protein_coding	O43292	0.797119	6.61591e-21	0.55849	1.09286e-11	0	0	0
ENSG00000197976	AKAP17A	protein_coding	Q02040	0.893869	1.93642e-16	0.629633	4.90517e-09	0	0	1
ENSG00000198026	ZNF335	protein_coding	Q9H4Z2	1.013	6.8001e-25	1.12597	1.01378e-24	0	0	1
ENSG00000198055	GRK6	protein_coding	P43250	0.782329	9.35146e-24	0.975156	4.22636e-39	0	0	0
ENSG00000198089	SFI1	protein_coding	A8K8P3	0.745151	8.22521e-09	1.42655	7.31273e-27	0	0	0
ENSG00000198198	SZT2	protein_coding	Q5T011	0.717647	4.16427e-11	1.22495	3.95812e-20	0	0	0
ENSG00000198208	RPS6KL1	protein_coding	Q9Y6S9	1.29811	2.4398e-34	1.31678	4.63923e-26	0	0	0
ENSG00000198355	PIM3	protein_coding	Q86V86	1.04639	1.76234e-16	0.564294	1.03931e-08	0	0	0
ENSG00000198625	MDM4	protein_coding	O15151	0.367179	0.0345698	1.08865	5.29057e-19	0	0	0
ENSG00000198728	LDB1	protein_coding	Q86U70	1.31279	7.9778e-68	0.808066	1.66162e-09	0	0	0
ENSG00000198752	CDC42BPB	protein_coding	Q9Y5S2	0.357753	0.000132628	0.913232	1.70151e-22	0	0	0
ENSG00000198792	TMEM184B	protein_coding	Q9Y519	0.962923	2.63601e-28	1.09051	5.37001e-16	0	0	0
ENSG00000198837	DENND4B	protein_coding	O75064	1.11588	4.3914e-25	1.64205	1.2259e-46	0	0	0
ENSG00000198876	DCAF12	protein_coding	Q5T6F0	0.417704	4.52923e-06	0.530894	0.000174029	0	0	0
ENSG00000198879	SFMBT2	protein_coding	Q5VUG0	0.561469	5.73215e-12	0.964699	1.02755e-22	0	0	0
ENSG00000198909	MAP3K3	protein_coding	Q99759	0.857179	1.18297e-11	1.09849	1.14751e-15	0	0	0
ENSG00000198911	SREBF2	protein_coding	Q12772	0.449588	3.39602e-07	0.55169	3.82797e-11	0	0	1
ENSG00000198917	SPOUT1	protein_coding	Q5T280	0.579094	1.60668e-13	0.42349	1.4462e-07	0	0	0
ENSG00000198920	KIAA0753	protein_coding	Q2KHM9	0.738635	0.000380407	0.854664	8.11738e-05	0	0	0
ENSG00000198925	ATG9A	protein_coding	Q7Z3C6	0.411404	0.00130549	0.387161	0.00527635	0	0	0
ENSG00000198952	SMG5	protein_coding	Q9UPR3	0.970354	7.40504e-31	1.29227	4.95291e-47	0	0	0
ENSG00000203485	INF2	protein_coding	Q27J81	0.874365	2.6591e-07	0.701605	4.43749e-09	0	0	1
ENSG00000203867	RBM20	protein_coding	Q5T481	0.475307	0.000270731	0.630248	4.02729e-07	0	0	0
ENSG00000203995	ZYG11A	protein_coding	Q6WRX3	0.638669	3.89731e-08	0.895729	3.03553e-14	0	0	0
ENSG00000204084	INPP5B	protein_coding	P32019	0.405957	6.55874e-05	0.338503	0.0145753	0	0	1
ENSG00000204673	AKT1S1	protein_coding	Q96B36	0.830863	3.05067e-08	0.534841	7.79176e-07	0	0	0
ENSG00000204859	ZBTB48	protein_coding	P10074	0.566448	5.71919e-09	0.768449	3.43134e-14	0	0	0
ENSG00000205060	SLC35B4	protein_coding	Q969S0	0.385209	0.00210784	0.859892	5.72478e-13	0	0	0
ENSG00000205213	LGR4	protein_coding	Q9BXB1	0.596569	5.78079e-05	0.461893	0.0244022	0	0	0
ENSG00000205476	CCDC85C	protein_coding	A6NKD9	1.20005	1.85801e-21	1.30376	1.54928e-28	0	0	0
ENSG00000205903	ZNF316	protein_coding	A6NFI3	1.00541	6.4148e-36	1.13403	1.28478e-30	0	0	0
ENSG00000205937	RNPS1	protein_coding	Q15287	0.30299	0.00571202	0.605206	6.83125e-05	0	0	0
ENSG00000213339	QTRT1	protein_coding	Q9BXR0	0.901566	3.72506e-15	0.57756	3.01195e-06	1	0	0
ENSG00000213523	SRA1	protein_coding	Q9HD15	1.05458	2.02748e-30	0.577272	1.22639e-10	0	0	0
ENSG00000213672	NCKIPSD	protein_coding	Q9NZQ3	0.416212	6.04008e-05	0.51249	1.94951e-05	0	0	0
ENSG00000213923	CSNK1E	protein_coding	P49674	1.14697	3.18037e-75	1.12975	4.84738e-46	0	0	0
ENSG00000213995	NAXD	protein_coding	Q8IW45	1.0128	6.12169e-18	1.14606	3.13447e-16	1	0	0
ENSG00000214022	REPIN1	protein_coding	Q9BWE0	0.812212	6.12749e-11	1.12926	1.02755e-22	0	0	1
ENSG00000214655	ZSWIM8	protein_coding	A7E2V4	0.980649	1.88268e-18	1.3142	5.75057e-32	0	0	1
ENSG00000214706	IFRD2	protein_coding	Q12894	1.25564	3.07186e-46	1.01248	3.60204e-28	0	0	0
ENSG00000215041	NEURL4	protein_coding	Q96JN8	1.19918	5.78978e-54	0.888902	2.20067e-22	0	0	0
ENSG00000221829	FANCG	protein_coding	O15287	0.980227	8.14549e-32	0.75122	1.29683e-13	0	0	0
ENSG00000221978	CCNL2	protein_coding	Q96S94	1.2671	1.02809e-44	1.4578	3.35219e-42	0	0	0
ENSG00000223496	EXOSC6	protein_coding	Q5RKV6	0.703681	3.0102e-10	0.729417	2.36487e-18	0	0	0
ENSG00000225663	MCRIP1	protein_coding	C9JLW8	0.836791	1.38405e-14	0.51556	3.80382e-07	0	0	0
ENSG00000225697	SLC26A6	protein_coding	Q9BXS9	0.621342	1.96735e-10	0.577388	5.56895e-09	0	0	0
ENSG00000228300	C19orf24	protein_coding	Q9BVV8	0.605651	0.000163653	0.418782	0.00463722	0	0	0
ENSG00000234616	JRK	protein_coding	O75564	0.452492	7.29602e-05	0.95974	1.25927e-17	0	0	0
ENSG00000238227	C9orf69	protein_coding	#N/A	1.19753	2.96383e-37	1.34819	8.75485e-38	0	0	0
ENSG00000241878	PISD	protein_coding	Q9UG56	0.821281	1.14572e-18	0.619425	1.38587e-13	1	0	0
ENSG00000241973	PI4KA	protein_coding	P42356	0.424521	0.000777645	0.472466	0.00296312	1	0	0
ENSG00000243156	MICAL3	protein_coding	Q7RTP6	0.769215	2.27543e-20	1.00697	4.61036e-19	0	0	0
ENSG00000244486	SCARF2	protein_coding	Q96GP6	1.27662	1.34426e-33	1.24655	8.71648e-33	0	0	0
ENSG00000249115	HAUS5	protein_coding	O94927	1.07889	1.37464e-31	0.878085	7.05062e-31	0	0	0
ENSG00000254470	AP5B1	protein_coding	Q2VPB7	0.561366	7.96193e-06	0.891081	4.57111e-13	0	0	0
ENSG00000255823	MTRNR2L8	protein_coding	P0CJ75	1.22256	1.63588e-13	1.66135	2.00775e-12	0	0	0
ENSG00000258890	CEP95	protein_coding	Q96GE4	0.345602	0.00588785	0.836344	2.80783e-18	0	0	0
ENSG00000259956	RBM15B	protein_coding	Q8NDT2	0.418684	0.0052485	0.734498	1.13882e-09	0	0	0
ENSG00000261236	BOP1	protein_coding	Q14137	0.46876	4.35633e-11	0.445368	9.04056e-06	0	0	0
ENSG00000264522	OTUD7B	protein_coding	Q6GQQ9	0.49648	9.22458e-07	0.446738	3.38714e-05	0	0	0
ENSG00000266074	BAHCC1	protein_coding	Q9P281	1.1905	5.64554e-13	1.34945	1.00311e-23	0	0	0
ENSG00000272333	KMT2B	protein_coding	Q9UMN6	1.17067	4.13849e-47	1.51909	5.22785e-48	0	0	0
ENSG00000272391	POM121C	protein_coding	A8CG34	0.892595	1.5357e-10	0.99928	3.96915e-08	0	0	0
ENSG00000274523	RCC1L	protein_coding	Q96I51	0.544055	1.13099e-08	0.637937	2.51659e-10	1	0	0
									1	0
									0	0
									0	0
									0	0
									0	0
									0	0
									0	0
									0	0
									0	0
									0	0
									0	0
									0	0
									0	0
									0	0
									0	0
									0	0
									0	0
									0	0
									0	0
									0	0
									0	0
									0	1
									0	0
									0	0
									0	0

## Sheet: Unfiltered data
Ensemble Gene ID	Gene name	Gene type	UniprotID	Log2 (OMM E/I)	P-adj (OMM E/I)	Log2 (Enrich O/N)	P-adj (Enrich O/N)	MitoCarta
ENSG00000000003	TSPAN6	protein_coding	O43657	-1.15516	3.51201e-57	-1.05782	5.74259e-44	0
ENSG00000000005	TNMD	protein_coding	Q9H2S6	-0.808674	0.26513	0.286569	0.723378	0
ENSG00000000419	DPM1	protein_coding	O60762	-0.964857	1.28844e-26	-0.895095	1.4783e-31	0
ENSG00000000457	SCYL3	protein_coding	Q8IZE3	-0.361226	0.00323395	-0.261668	0.0606331	0
ENSG00000000460	C1orf112	protein_coding	#N/A	-0.625265	2.73305e-12	-0.347264	0.000115265	0
ENSG00000000938	FGR	protein_coding	P09769	2.22228	NA	2.72716	NA	0
ENSG00000000971	CFH	protein_coding	P08603	-0.568279	0.639643	-0.48882	0.664351	0
ENSG00000001036	FUCA2	protein_coding	Q9BTY2	-0.723927	9.97312e-12	-0.498157	0.000342964	0
ENSG00000001084	GCLC	protein_coding	P48506	-0.27944	0.00576814	-0.0503703	0.671567	0
ENSG00000001167	NFYA	protein_coding	P23511	-0.675236	1.1429e-08	-0.682719	3.80462e-08	0
ENSG00000001460	STPG1	protein_coding	Q5TH74	-0.628048	6.8822e-07	-0.332483	0.020851	0
ENSG00000001461	NIPAL3	protein_coding	Q6P499	0.752107	2.64574e-05	0.588218	0.00517766	0
ENSG00000001497	LAS1L	protein_coding	Q9Y4W2	-0.181732	0.121096	-0.416194	4.59809e-06	0
ENSG00000001561	ENPP4	protein_coding	Q9Y6X5	-1.09023	7.21969e-25	-0.936369	1.12271e-10	0
ENSG00000001617	SEMA3F	protein_coding	Q13275	0.678754	5.20347e-06	0.782741	1.46557e-08	0
ENSG00000001626	CFTR	protein_coding	P13569	1.47989	0.44523	3.18996	0.0733976	0
ENSG00000001629	ANKIB1	protein_coding	Q9P2G1	0.596043	5.93881e-05	0.891038	3.3098e-07	0
ENSG00000001630	CYP51A1	protein_coding	Q16850	0.308775	0.341245	-0.559444	0.00404864	0
ENSG00000001631	KRIT1	protein_coding	O00522	-0.770859	5.6143e-10	-0.12736	0.527535	0
ENSG00000002016	RAD52	protein_coding	P43351	0.723367	4.8509e-09	1.02707	4.60698e-21	0
ENSG00000002079	MYH16	unitary_pseudogene	Q9H6N6	0.877207	0.0125905	1.29584	0.000532999	0
ENSG00000002330	BAD	protein_coding	Q92934	0.0298651	0.895805	-0.196208	0.242158	1
ENSG00000002549	LAP3	protein_coding	P28838	-0.497426	4.91808e-06	-0.872286	4.92135e-10	1
ENSG00000002586	CD99	protein_coding	P14209	0.118538	0.255508	-0.449196	1.17065e-06	0
ENSG00000002587	HS3ST1	protein_coding	O14792	0.999335	NA	-0.689042	NA	0
ENSG00000002726	AOC1	protein_coding	P19801	-0.154807	NA	-0.668928	NA	0
ENSG00000002745	WNT16	protein_coding	Q9UBV4	0.386051	0.828783	1.21708	0.438234	0
ENSG00000002746	HECW1	protein_coding	Q76N89	0.190226	0.871641	-0.063881	0.947678	0
ENSG00000002822	MAD1L1	protein_coding	Q9Y6D9	0.530188	2.7947e-08	0.453772	9.52983e-08	0
ENSG00000002834	LASP1	protein_coding	Q14847	-0.168128	0.135702	-0.632324	2.27675e-09	0
ENSG00000002919	SNX11	protein_coding	Q9Y5W9	0.603511	1.87388e-07	0.379348	0.000478811	0
ENSG00000002933	TMEM176A	protein_coding	Q96HP8	NA	NA	NA	NA	0
ENSG00000003056	M6PR	protein_coding	P20645	0.126421	0.534145	-0.322547	0.112243	0
ENSG00000003096	KLHL13	protein_coding	Q9P2N7	-0.705086	5.6121e-12	-0.635261	4.57078e-08	0
ENSG00000003137	CYP26B1	protein_coding	Q9NR63	0.656833	0.001244	0.621789	0.00328835	0
ENSG00000003147	ICA1	protein_coding	Q05084	-0.284094	0.288213	-0.34486	0.132838	0
ENSG00000003249	DBNDD1	protein_coding	Q9H9R9	0.360084	0.022893	0.907759	3.62998e-09	0
ENSG00000003393	ALS2	protein_coding	Q96Q42	0.0517245	0.706278	0.357347	0.00195548	0
ENSG00000003400	CASP10	protein_coding	Q92851	-0.81939	1.40738e-06	-0.917602	1.21517e-07	0
ENSG00000003402	CFLAR	protein_coding	O15519	0.362344	0.000978773	0.301317	0.00830159	0
ENSG00000003436	TFPI	protein_coding	P10646	-0.959519	1.68055e-07	-0.929059	5.02567e-05	0
ENSG00000003509	NDUFAF7	protein_coding	Q7L592	-0.184954	0.214288	-0.2297	0.145604	1
ENSG00000003756	RBM5	protein_coding	P52756	0.425923	3.51161e-06	0.69224	9.38212e-07	0
ENSG00000003987	MTMR7	protein_coding	Q9Y216	0.135591	0.662745	-0.356869	0.158436	0
ENSG00000003989	SLC7A2	protein_coding	P52569	-0.285761	0.0836022	-0.0894829	0.520674	0
ENSG00000004059	ARF5	protein_coding	P84085	-0.53882	1.18611e-06	-1.03332	3.20346e-26	1
ENSG00000004139	SARM1	protein_coding	Q6SZW1	1.74391	4.84025e-38	1.16418	2.07668e-26	0
ENSG00000004142	POLDIP2	protein_coding	Q9Y2S7	-0.17407	0.08584	-0.447598	0.000385629	1
ENSG00000004399	PLXND1	protein_coding	Q9Y4D7	1.02588	5.3778e-16	1.34405	8.41769e-30	0
ENSG00000004455	AK2	protein_coding	P54819	-0.231804	0.00220639	-0.382487	1.29448e-07	1
ENSG00000004468	CD38	protein_coding	P28907	1.04299	NA	-1.0505	0.555616	0
ENSG00000004478	FKBP4	protein_coding	Q02790	-0.156203	0.234811	-0.556987	1.21673e-10	0
ENSG00000004487	KDM1A	protein_coding	O60341	-0.319049	0.000352077	-0.388983	0.00027905	0
ENSG00000004534	RBM6	protein_coding	P78332	0.177426	0.0326177	0.382569	0.00195375	0
ENSG00000004660	CAMKK1	protein_coding	Q8N5S9	0.505932	1.69723e-06	0.806997	6.75919e-14	0
ENSG00000004700	RECQL	protein_coding	P46063	-0.904426	1.81295e-31	-0.515864	0.000449072	0
ENSG00000004766	VPS50	protein_coding	Q96JG6	-0.917388	5.88885e-15	-0.910484	3.44121e-13	0
ENSG00000004776	HSPB6	protein_coding	O14558	0.91691	0.0433089	0.949537	0.00932707	0
ENSG00000004777	ARHGAP33	protein_coding	O14559	1.03613	8.14036e-05	1.00226	0.000335296	0
ENSG00000004779	NDUFAB1	protein_coding	O14561	-0.26815	0.0426645	-1.09739	5.37296e-46	1
ENSG00000004799	PDK4	protein_coding	Q16654	-0.89731	0.0257237	-0.33093	0.491808	1
ENSG00000004809	SLC22A16	protein_coding	Q86VW1	-1.30969	NA	-0.268108	NA	0
ENSG00000004838	ZMYND10	protein_coding	O75800	0.935187	0.00637194	1.71508	2.66513e-07	0
ENSG00000004846	ABCB5	protein_coding	Q2M3G0	-0.0191072	NA	-0.742134	NA	0
ENSG00000004848	ARX	protein_coding	Q96QS3	0.944309	0.485445	2.72009	0.0547116	0
ENSG00000004864	SLC25A13	protein_coding	Q9UJS0	-0.555223	7.27014e-09	-0.694522	3.50289e-06	1
ENSG00000004866	ST7	protein_coding	Q9NRC1	0.473997	0.000656166	0.615827	8.62192e-06	0
ENSG00000004897	CDC27	protein_coding	P30260	0.187892	0.135216	0.239914	0.00985642	0
ENSG00000004939	SLC4A1	protein_coding	P02730	1.4843	0.0812019	1.76331	0.0231565	0
ENSG00000004948	CALCR	protein_coding	P30988	-1.17784	NA	-1.04607	NA	0
ENSG00000004961	HCCS	protein_coding	P53701	-0.835223	1.01883e-09	-1.088	1.02395e-15	1
ENSG00000004975	DVL2	protein_coding	O14641	0.222354	0.0653679	0.369486	0.00540247	0
ENSG00000005001	PRSS22	protein_coding	Q9GZN4	NA	NA	NA	NA	0
ENSG00000005007	UPF1	protein_coding	Q92900	0.37986	0.0172034	-0.178203	0.352298	0
ENSG00000005020	SKAP2	protein_coding	O75563	-0.0458662	0.759187	-0.353998	0.0246782	0
ENSG00000005022	SLC25A5	protein_coding	P05141	-0.535408	0.00350019	-1.18405	4.14377e-19	1
ENSG00000005059	MCUB	protein_coding	Q9NWR8	0.0543961	0.783535	-0.513926	0.000334518	1
ENSG00000005073	HOXA11	protein_coding	P31270	-0.27162	0.0459165	0.33446	0.00542328	0
ENSG00000005075	POLR2J	protein_coding	P52435	0.224628	0.371239	0.011301	0.962763	0
ENSG00000005100	DHX33	protein_coding	Q9H6R0	0.301024	2.54584e-05	-0.0433949	0.636535	0
ENSG00000005102	MEOX1	protein_coding	P50221	0.462477	0.425135	-0.0559393	0.917102	0
ENSG00000005108	THSD7A	protein_coding	Q9UPZ6	0.454214	0.453871	0.703933	0.151687	0
ENSG00000005156	LIG3	protein_coding	P49916	-0.0132907	0.950579	-0.369221	0.12465	0
ENSG00000005175	RPAP3	protein_coding	Q9H6T3	-1.12805	4.8018e-35	-0.975443	6.82382e-18	0
ENSG00000005187	ACSM3	protein_coding	Q53FZ2	-0.543001	0.172037	-0.321536	0.418716	1
ENSG00000005189	AC004381.6	protein_coding	#N/A	-0.174087	0.146672	0.119105	0.296787	0
ENSG00000005194	CIAPIN1	protein_coding	Q6FI81	-0.369344	0.00821692	-0.62088	1.6808e-07	0
ENSG00000005206	SPPL2B	protein_coding	Q8TCT7	1.50179	6.96113e-40	1.61228	8.49423e-38	0
ENSG00000005238	FAM214B	protein_coding	Q7L5A3	0.946385	0.0127073	0.815215	0.021982	0
ENSG00000005243	COPZ2	protein_coding	Q9P299	0.804327	0.160796	1.28263	0.0258627	0
ENSG00000005249	PRKAR2B	protein_coding	P31323	-0.69571	6.79916e-10	-0.530291	5.31384e-06	0
ENSG00000005302	MSL3	protein_coding	Q8N5Y2	-0.0731938	0.79909	-0.267052	0.267218	0
ENSG00000005339	CREBBP	protein_coding	Q92793	0.193399	0.0587659	0.267007	0.0077551	0
ENSG00000005379	TSPOAP1	protein_coding	O95153	0.823042	0.51358	1.66597	0.177948	0
ENSG00000005381	MPO	protein_coding	P05164	1.33454	NA	2.41698	NA	0
ENSG00000005421	PON1	protein_coding	P27169	0.410172	NA	2.86664	NA	0
ENSG00000005436	GCFC2	protein_coding	P16383	-0.378122	3.47052e-05	-0.120096	0.338436	0
ENSG00000005448	WDR54	protein_coding	Q9H977	-0.0888491	0.63143	-0.407039	0.00101316	0
ENSG00000005469	CROT	protein_coding	Q9UKG9	-0.817813	1.12318e-06	-0.660624	0.00104724	1
ENSG00000005471	ABCB4	protein_coding	P21439	0.0273407	0.959632	-0.0807223	0.851313	0
ENSG00000005483	KMT2E	protein_coding	Q8IZD2	0.0403757	0.828048	0.637192	1.60179e-05	0
ENSG00000005486	RHBDD2	protein_coding	Q6NTF9	0.385602	0.0125831	0.31204	0.0493521	0
ENSG00000005513	SOX8	protein_coding	P57073	0.799109	0.0017668	1.02588	4.48413e-06	0
ENSG00000005700	IBTK	protein_coding	Q9P2D0	-1.19799	0.444191	-0.919436	0.588426	0
ENSG00000005801	ZNF195	protein_coding	O14628	-0.302803	0.00956692	-0.449272	7.17768e-06	0
ENSG00000005810	MYCBP2	protein_coding	O75592	0.13781	0.0425005	0.785789	7.87202e-24	0
ENSG00000005812	FBXL3	protein_coding	Q9UKT7	-0.813548	3.60061e-16	-0.498468	4.52503e-07	0
ENSG00000005844	ITGAL	protein_coding	P20701	0.208093	0.853771	1.18661	0.22696	0
ENSG00000005882	PDK2	protein_coding	Q15119	-0.347035	0.0574934	-0.586753	0.000725627	1
ENSG00000005884	ITGA3	protein_coding	P26006	0.423974	0.0161661	0.701995	5.74386e-07	0
ENSG00000005889	ZFX	protein_coding	P17010	-0.712528	5.71365e-15	-0.360133	0.000588939	0
ENSG00000005893	LAMP2	protein_coding	P13473	-0.742401	3.80795e-26	-1.03289	3.66893e-21	0
ENSG00000005961	ITGA2B	protein_coding	P08514	0.348666	0.143104	0.432929	0.0586654	0
ENSG00000005981	ASB4	protein_coding	Q9Y574	NA	NA	NA	NA	0
ENSG00000006007	GDE1	protein_coding	Q9NZC3	-0.0871402	0.413484	-0.264071	0.00360389	0
ENSG00000006015	C19orf60	protein_coding	#N/A	0.840115	3.17761e-09	0.692164	8.07457e-06	0
ENSG00000006016	CRLF1	protein_coding	O75462	0.428478	0.413321	-0.0101162	0.984235	0
ENSG00000006025	OSBPL7	protein_coding	Q9BZF2	0.773302	0.00222329	1.01364	0.000107716	0
ENSG00000006042	TMEM98	protein_coding	Q9Y2Y6	0.093626	0.587403	-0.16002	0.272567	0
ENSG00000006047	YBX2	protein_coding	Q9Y2T7	0.740803	0.146145	0.270113	0.580387	0
ENSG00000006059	KRT33A	protein_coding	O76009	NA	NA	NA	NA	0
ENSG00000006062	MAP3K14	protein_coding	Q99558	0.74909	0.0010413	1.0958	2.14703e-10	0
ENSG00000006071	ABCC8	protein_coding	Q09428	1.39449	1.20416e-06	1.19183	4.62743e-05	0
ENSG00000006116	CACNG3	protein_coding	O60359	NA	NA	NA	NA	0
ENSG00000006118	TMEM132A	protein_coding	Q24JP5	0.933539	3.10438e-16	0.685967	3.40767e-11	0
ENSG00000006125	AP2B1	protein_coding	P63010	-0.805983	1.83097e-29	-0.957416	1.31563e-23	0
ENSG00000006128	TAC1	protein_coding	P20366	-0.285825	0.574281	-0.483217	0.165207	0
ENSG00000006194	ZNF263	protein_coding	O14978	0.424555	0.00165924	0.595574	1.28549e-06	0
ENSG00000006210	CX3CL1	protein_coding	P78423	1.11746	NA	-0.626042	NA	0
ENSG00000006282	SPATA20	protein_coding	Q8TB22	1.32221	1.89703e-26	1.11553	1.9984e-16	1
ENSG00000006283	CACNA1G	protein_coding	O43497	1.97894	2.97151e-12	1.64463	4.0786e-08	0
ENSG00000006327	TNFRSF12A	protein_coding	Q9NP84	1.11584	7.55837e-15	0.613246	2.09723e-05	0
ENSG00000006377	DLX6	protein_coding	P56179	-0.198458	0.440449	-0.346619	0.108127	0
ENSG00000006432	MAP3K9	protein_coding	P80192	0.755083	2.39928e-10	1.33844	1.05773e-23	0
ENSG00000006451	RALA	protein_coding	P11233	-0.502447	9.76907e-06	-0.749158	4.78085e-14	0
ENSG00000006453	BAIAP2L1	protein_coding	Q9UHR4	0.582399	0.000297334	0.549645	0.00650568	0
ENSG00000006459	KDM7A	protein_coding	Q6ZMT4	-0.161814	0.0763569	-0.169136	0.0848009	0
ENSG00000006468	ETV1	protein_coding	P50549	-0.342697	0.345712	-0.0269152	0.955716	0
ENSG00000006530	AGK	protein_coding	Q53H12	-0.932719	1.19931e-09	-1.07947	3.08248e-11	1
ENSG00000006534	ALDH3B1	protein_coding	P43353	0.892212	0.0167662	1.52759	4.82576e-06	0
ENSG00000006555	TTC22	protein_coding	#N/A	-0.672562	NA	NA	NA	0
ENSG00000006576	PHTF2	protein_coding	Q8N3S3	-0.509226	4.55682e-05	-0.0186462	0.92989	0
ENSG00000006606	CCL26	protein_coding	Q9Y258	0.422265	NA	0.934708	NA	0
ENSG00000006607	FARP2	protein_coding	O94887	-0.243167	0.00245652	-0.0760526	0.540377	0
ENSG00000006611	USH1C	protein_coding	Q9Y6N9	0.607322	0.0317641	0.250794	0.342034	0
ENSG00000006625	GGCT	protein_coding	O75223	-0.551586	0.0388151	-0.945836	9.73561e-05	0
ENSG00000006634	DBF4	protein_coding	Q9UBU7	-0.822095	3.37213e-17	-1.01976	5.06056e-19	0
ENSG00000006638	TBXA2R	protein_coding	P21731	0.527824	0.417848	0.875659	0.118783	0
ENSG00000006652	IFRD1	protein_coding	O00458	0.149811	0.260247	0.623463	6.82554e-05	0
ENSG00000006659	LGALS14	protein_coding	Q8TCE9	NA	NA	NA	NA	0
ENSG00000006695	COX10	protein_coding	Q12887	-0.315393	0.0299567	0.221062	0.117965	1
ENSG00000006704	GTF2IRD1	protein_coding	Q9UHL9	0.748982	6.69456e-11	0.535786	4.13355e-06	0
ENSG00000006712	PAF1	protein_coding	Q8N7H5	0.048305	0.603039	-0.113849	0.330772	0
ENSG00000006715	VPS41	protein_coding	P49754	-0.111775	0.17841	-0.10995	0.240897	0
ENSG00000006740	ARHGAP44	protein_coding	Q17R89	0.504957	0.00247579	1.12946	1.44096e-12	0
ENSG00000006744	ELAC2	protein_coding	Q9BQ52	0.0771314	0.438671	0.0424703	0.74604	1
ENSG00000006747	SCIN	protein_coding	Q9Y6U3	-0.198231	0.739864	-1.1158	0.00662115	0
ENSG00000006756	ARSD	protein_coding	P51689	-0.350286	NA	-0.380144	NA	0
ENSG00000006757	PNPLA4	protein_coding	P41247	0.574711	0.03893	0.124121	0.627492	0
ENSG00000006788	MYH13	protein_coding	Q9UKX3	1.63072	NA	1.55796	NA	0
ENSG00000006831	ADIPOR2	protein_coding	Q86V24	0.160357	0.249412	-0.431321	0.000544098	0
ENSG00000006837	CDKL3	protein_coding	Q8IVW4	0.0408945	0.922656	-0.445374	0.0675865	0
ENSG00000007001	UPP2	protein_coding	O95045	-0.154807	NA	0.357635	NA	0
ENSG00000007038	PRSS21	protein_coding	Q9Y6M0	-0.154807	NA	NA	NA	0
ENSG00000007047	MARK4	protein_coding	Q96L34	0.872312	1.51357e-07	0.918132	1.87457e-15	0
ENSG00000007062	PROM1	protein_coding	O43490	-2.67538	NA	-0.466561	NA	0
ENSG00000007080	CCDC124	protein_coding	Q96CT7	0.426823	0.0321825	-0.45424	0.000868875	0
ENSG00000007129	CEACAM21	protein_coding	Q3KPI0	NA	NA	NA	NA	0
ENSG00000007168	PAFAH1B1	protein_coding	P43034	-0.825941	1.46109e-20	-0.473663	0.000120653	0
ENSG00000007171	NOS2	protein_coding	P35228	-0.00168397	0.997529	-0.00433285	0.992402	0
ENSG00000007174	DNAH9	protein_coding	Q9NYC9	0.38977	NA	1.00563	NA	0
ENSG00000007202	KIAA0100	protein_coding	Q14667	1.04816	3.67745e-14	1.37227	2.37442e-10	1
ENSG00000007216	SLC13A2	protein_coding	Q13183	NA	NA	NA	NA	0
ENSG00000007237	GAS7	protein_coding	O60861	-0.108857	0.757777	0.107664	0.746144	0
ENSG00000007255	TRAPPC6A	protein_coding	O75865	-0.165345	0.455212	-0.726529	4.54517e-07	0
ENSG00000007264	MATK	protein_coding	P42679	0.75444	4.77603e-07	0.899858	1.89229e-09	0
ENSG00000007306	CEACAM7	protein_coding	Q14002	NA	NA	NA	NA	0
ENSG00000007312	CD79B	protein_coding	P40259	-1.25007	NA	-0.370424	NA	0
ENSG00000007314	SCN4A	protein_coding	P35499	0.369338	0.417058	1.11105	0.00260241	0
ENSG00000007341	ST7L	protein_coding	Q8TDW4	-0.449328	5.12604e-05	-0.0977816	0.427917	0
ENSG00000007350	TKTL1	protein_coding	P51854	-0.750619	0.297279	-0.855241	0.208006	0
ENSG00000007372	PAX6	protein_coding	P26367	0.15241	0.312815	0.107944	0.497372	0
ENSG00000007376	RPUSD1	protein_coding	Q9UJJ7	0.765514	2.67217e-06	0.434786	8.56948e-05	0
ENSG00000007384	RHBDF1	protein_coding	Q96CC6	1.59588	1.50764e-12	1.56006	1.75207e-14	0
ENSG00000007392	LUC7L	protein_coding	Q9NQ29	0.38439	0.0042002	-0.286384	0.00246056	0
ENSG00000007402	CACNA2D2	protein_coding	Q9NY47	0.345384	0.0487244	-0.137487	0.372679	0
ENSG00000007516	BAIAP3	protein_coding	O94812	1.36477	1.13994e-07	1.50097	3.12566e-10	0
ENSG00000007520	TSR3	protein_coding	Q9UJK0	1.28049	1.29173e-13	0.554994	1.86708e-07	0
ENSG00000007541	PIGQ	protein_coding	Q9BRB3	1.11791	1.84191e-14	1.52098	3.3621e-25	0
ENSG00000007545	CRAMP1	protein_coding	Q96RY5	0.62929	1.46901e-05	1.35064	4.47646e-22	0
ENSG00000007866	TEAD3	protein_coding	Q99594	0.291614	0.0615186	0.520065	0.00036379	0
ENSG00000007908	SELE	protein_coding	P16581	-0.154807	NA	-0.466561	NA	0
ENSG00000007923	DNAJC11	protein_coding	Q9NVH1	0.193468	0.158833	-0.28504	0.0043871	1
ENSG00000007933	FMO3	protein_coding	P31513	0.999335	NA	0.934708	NA	0
ENSG00000007944	MYLIP	protein_coding	Q8WY64	-0.0422659	0.818076	0.478113	0.00456033	0
ENSG00000007952	NOX1	protein_coding	Q9Y5S8	-1.50306	NA	-0.794339	NA	0
ENSG00000007968	E2F2	protein_coding	Q14209	-0.672562	NA	NA	NA	0
ENSG00000008018	PSMB1	protein_coding	P20618	-0.054031	0.747482	-0.700853	2.86665e-07	0
ENSG00000008056	SYN1	protein_coding	P17600	0.10772	0.735205	0.125783	0.694744	0
ENSG00000008083	JARID2	protein_coding	Q92833	0.361895	0.00422904	0.695386	8.2066e-08	0
ENSG00000008086	CDKL5	protein_coding	O76039	-0.126967	0.64464	0.265802	0.23782	0
ENSG00000008118	CAMK1G	protein_coding	Q96NX5	0.565819	NA	0.996677	NA	0
ENSG00000008128	CDK11A	protein_coding	Q9UQ88	0.669371	0.128175	1.23011	0.00200023	0
ENSG00000008130	NADK	protein_coding	O95544	0.751168	7.12425e-23	1.11158	1.61614e-36	0
ENSG00000008196	TFAP2B	protein_coding	Q92481	-0.154807	NA	0.357635	NA	0
ENSG00000008197	TFAP2D	protein_coding	Q7Z6R9	NA	NA	NA	NA	0
ENSG00000008226	DLEC1	protein_coding	Q9Y238	0.930686	0.118029	1.57892	0.00230052	0
ENSG00000008256	CYTH3	protein_coding	O43739	0.0686079	0.650794	0.503037	7.56987e-05	0
ENSG00000008277	ADAM22	protein_coding	Q9P0K1	-0.394901	0.144628	-0.348835	0.130683	0
ENSG00000008282	SYPL1	protein_coding	Q16563	-0.735398	3.50111e-09	-0.754373	3.96353e-09	0
ENSG00000008283	CYB561	protein_coding	P49447	1.06015	4.80823e-09	1.11528	2.59507e-10	0
ENSG00000008294	SPAG9	protein_coding	O60271	0.0473022	0.687354	0.0634302	0.531376	0
ENSG00000008300	CELSR3	protein_coding	Q9NYQ7	1.21643	9.41966e-37	1.53926	1.39459e-48	0
ENSG00000008311	AASS	protein_coding	Q9UDR5	-0.244346	0.220185	0.0543225	0.795381	1
ENSG00000008323	PLEKHG6	protein_coding	Q3KR16	0.42731	0.666026	1.26572	0.129827	0
ENSG00000008324	SS18L2	protein_coding	Q9UHA2	-0.0894332	0.590137	-0.415103	0.000288789	0
ENSG00000008382	MPND	protein_coding	Q8N594	0.745301	4.28334e-06	0.844626	3.22725e-08	0
ENSG00000008394	MGST1	protein_coding	P10620	-1.0727	5.8168e-35	-1.11215	6.63809e-43	1
ENSG00000008405	CRY1	protein_coding	Q16526	-0.531496	1.33099e-08	-0.22091	0.0511272	1
ENSG00000008438	PGLYRP1	protein_coding	O75594	0.895252	0.37332	2.4792	0.0182877	0
ENSG00000008441	NFIX	protein_coding	Q14938	0.67074	2.24993e-09	0.91626	1.61354e-15	0
ENSG00000008513	ST3GAL1	protein_coding	Q11201	0.685015	0.0124348	0.712895	0.00345124	0
ENSG00000008516	MMP25	protein_coding	Q9NPA2	0.64502	0.267352	1.00266	0.0336628	0
ENSG00000008517	IL32	protein_coding	P24001	-0.634012	0.264162	-1.04087	0.043359	0
ENSG00000008710	PKD1	protein_coding	P98161	1.34502	8.28155e-62	1.81071	6.06292e-52	0
ENSG00000008735	MAPK8IP2	protein_coding	Q13387	0.208982	0.0928887	0.192058	0.146717	0
ENSG00000008838	MED24	protein_coding	O75448	0.288981	0.00172376	0.224602	0.0101938	0
ENSG00000008853	RHOBTB2	protein_coding	Q9BYZ6	0.792315	8.75129e-05	1.19707	6.40125e-07	0
ENSG00000008869	HEATR5B	protein_coding	Q9P2D3	-0.313972	0.00515015	0.0560857	0.716807	0
ENSG00000008952	SEC62	protein_coding	Q99442	-0.652141	1.71611e-11	-0.786109	4.1594e-17	0
ENSG00000008988	RPS20	protein_coding	P60866	0.150702	0.384881	-0.434575	0.000796539	0
ENSG00000009307	CSDE1	protein_coding	O75534	-0.304795	0.0010388	-0.288774	0.00883819	0
ENSG00000009335	UBE3C	protein_coding	Q15386	0.252165	0.0524192	0.756393	7.29384e-11	0
ENSG00000009413	REV3L	protein_coding	O60673	0.487475	9.52689e-06	0.790548	0.00110879	0
ENSG00000009694	TENM1	protein_coding	Q9UKZ4	0.128538	0.729167	1.01982	0.000138307	0
ENSG00000009709	PAX7	protein_coding	P23759	0.13771	0.858566	0.329018	0.598241	0
ENSG00000009724	MASP2	protein_coding	O00187	0.918831	0.00237191	1.53791	2.32417e-08	0
ENSG00000009765	IYD	protein_coding	Q6PHW0	-0.643393	NA	0.82854	NA	0
ENSG00000009780	FAM76A	protein_coding	Q8TAV0	0.350199	0.00986017	0.167014	0.173198	0
ENSG00000009790	TRAF3IP3	protein_coding	Q9Y228	1.21933	0.342219	0.97784	0.403022	0
ENSG00000009830	POMT2	protein_coding	Q9UKY4	0.651912	1.29021e-10	1.05952	5.90024e-21	0
ENSG00000009844	VTA1	protein_coding	Q9NP79	-0.875174	7.74985e-25	-1.12448	1.4098e-48	0
ENSG00000009950	MLXIPL	protein_coding	Q9NP71	0.51888	0.0077458	0.750941	2.79288e-06	0
ENSG00000009954	BAZ1B	protein_coding	Q9UIG0	0.190157	0.02762	0.0674356	0.719559	0
ENSG00000010017	RANBP9	protein_coding	Q96S59	-0.264737	0.0105735	-0.319429	0.00167258	0
ENSG00000010030	ETV7	protein_coding	Q9Y603	1.1094	0.472568	2.24273	0.196214	0
ENSG00000010072	SPRTN	protein_coding	Q9H040	-0.666795	5.38008e-17	-0.672616	1.73682e-12	0
ENSG00000010165	METTL13	protein_coding	Q8N6R0	0.423372	0.000448406	0.000887005	0.994711	0
ENSG00000010219	DYRK4	protein_coding	Q9NR20	-0.31222	0.0638632	0.0974851	0.578917	0
ENSG00000010244	ZNF207	protein_coding	O43670	-0.359484	8.3956e-05	-0.309739	0.0030216	0
ENSG00000010256	UQCRC1	protein_coding	P31930	-0.36244	6.9099e-05	-0.755446	2.83727e-10	1
ENSG00000010270	STARD3NL	protein_coding	O95772	-0.000592862	0.998272	0.133518	0.45019	0
ENSG00000010278	CD9	protein_coding	P21926	-0.413849	0.000961037	-0.993849	6.0132e-13	0
ENSG00000010282	HHATL	protein_coding	Q9HCP6	0.787997	0.42276	1.53287	0.138404	0
ENSG00000010292	NCAPD2	protein_coding	Q15021	-0.0727798	0.521013	-0.252094	0.0321151	0
ENSG00000010295	IFFO1	protein_coding	Q0D2I5	1.88857	4.1778e-91	1.42379	2.37133e-32	0
ENSG00000010310	GIPR	protein_coding	P48546	1.27839	0.00102899	0.829862	0.00737797	0
ENSG00000010318	PHF7	protein_coding	Q9BWX1	0.224766	0.465323	0.358849	0.199288	0
ENSG00000010319	SEMA3G	protein_coding	Q9NS98	0.991914	2.16856e-06	0.700086	0.000331112	0
ENSG00000010322	NISCH	protein_coding	Q9Y2I1	0.913699	1.33092e-19	1.24977	2.02541e-34	0
ENSG00000010327	STAB1	protein_coding	Q9NY15	1.4699	0.040685	2.31667	0.000504421	0
ENSG00000010361	FUZ	protein_coding	Q9BT04	0.382383	2.01799e-05	0.529726	1.78284e-08	0
ENSG00000010379	SLC6A13	protein_coding	Q9NSD5	1.48406	5.98141e-05	2.58996	1.78854e-10	0
ENSG00000010404	IDS	protein_coding	P22304	-0.387444	0.171677	0.917339	1.20501e-06	0
ENSG00000010438	PRSS3	protein_coding	P35030	1.61302	NA	1.61837	0.3567	0
ENSG00000010539	ZNF200	protein_coding	P98182	0.343468	0.0172205	-0.365036	0.00194616	0
ENSG00000010610	CD4	protein_coding	P01730	1.43997	0.0203739	1.85103	0.00233712	0
ENSG00000010626	LRRC23	protein_coding	Q53EV4	0.187335	0.557172	0.299851	0.238207	0
ENSG00000010671	BTK	protein_coding	Q06187	0.347137	0.440519	0.857275	0.026871	0
ENSG00000010704	HFE	protein_coding	Q30201	0.377794	0.705244	1.37178	0.121058	0
ENSG00000010803	SCMH1	protein_coding	Q96GD3	0.404397	0.00293116	1.10985	5.05645e-24	0
ENSG00000010810	FYN	protein_coding	P06241	0.140524	0.237821	0.16311	0.269603	0
ENSG00000010818	HIVEP2	protein_coding	P31629	-0.0502137	0.81223	0.304908	0.0273982	0
ENSG00000010932	FMO1	protein_coding	Q01740	0.422265	NA	1.51178	NA	0
ENSG00000011007	TCEB3	protein_coding	#N/A	-0.311982	0.00518607	-0.319517	0.0784333	0
ENSG00000011009	LYPLA2	protein_coding	O95372	0.461899	0.00848216	-0.0221971	0.89757	0
ENSG00000011021	CLCN6	protein_coding	P51797	1.14537	2.62784e-31	1.01157	5.63628e-26	0
ENSG00000011028	MRC2	protein_coding	Q9UBG0	0.769837	3.09568e-06	0.938975	2.88236e-11	0
ENSG00000011052	NME1-NME2	protein_coding	#N/A	NA	NA	NA	NA	0
ENSG00000011083	SLC6A7	protein_coding	Q99884	-1.00783	NA	2.01946	NA	0
ENSG00000011105	TSPAN9	protein_coding	O75954	0.0182769	0.940838	0.140967	0.442534	0
ENSG00000011114	BTBD7	protein_coding	Q9P203	1.90752	0.286384	1.53551	0.284873	0
ENSG00000011132	APBA3	protein_coding	O96018	0.768081	9.83441e-07	0.781044	8.80559e-09	0
ENSG00000011143	MKS1	protein_coding	Q9NXB0	0.0973851	0.453458	-0.00118332	0.993845	0
ENSG00000011198	ABHD5	protein_coding	Q8WTS1	-0.158247	0.325417	-0.375985	0.00534236	0
ENSG00000011201	ANOS1	protein_coding	P23352	-2.65836	NA	-2.21455	NA	0
ENSG00000011243	AKAP8L	protein_coding	Q9ULX6	1.10879	5.99977e-21	0.549818	1.3699e-05	0
ENSG00000011258	MBTD1	protein_coding	Q05BQ5	0.0948674	0.509611	0.653433	5.81502e-09	0
ENSG00000011260	UTP18	protein_coding	Q9Y5J1	-0.759826	6.56225e-15	-0.451429	0.0525914	0
ENSG00000011275	RNF216	protein_coding	Q9NWF9	0.118557	0.14332	0.0863238	0.271808	0
ENSG00000011295	TTC19	protein_coding	Q6DKK2	0.257423	0.0301359	0.448019	0.000311529	1
ENSG00000011304	PTBP1	protein_coding	P26599	-0.283206	0.0637514	-0.336249	0.0193115	0
ENSG00000011332	DPF1	protein_coding	Q92782	0.973061	1.66897e-15	0.457471	0.000505135	0
ENSG00000011347	SYT7	protein_coding	O43581	0.853817	0.00402863	0.793623	0.00614336	0
ENSG00000011376	LARS2	protein_coding	Q15031	-0.583544	6.24549e-11	-0.278062	0.012307	1
ENSG00000011405	PIK3C2A	protein_coding	O00443	-0.526171	2.13661e-09	0.114881	0.203501	0
ENSG00000011422	PLAUR	protein_coding	Q03405	0.403931	0.0200985	0.197063	0.152203	0
ENSG00000011426	ANLN	protein_coding	Q9NQW6	-0.417491	4.02956e-05	-0.528351	0.0128505	0
ENSG00000011451	WIZ	protein_coding	O95785	0.384854	6.75523e-05	0.366793	0.0229884	0
ENSG00000011454	RABGAP1	protein_coding	Q9Y3P9	-0.348268	0.00303414	-0.0793294	0.610283	0
ENSG00000011465	DCN	protein_coding	P07585	0.900568	NA	-0.976719	0.585973	0
ENSG00000011478	QPCTL	protein_coding	Q9NXS2	0.383854	0.00465561	0.167666	0.20243	0
ENSG00000011485	PPP5C	protein_coding	P53041	0.57179	0.000135879	0.300302	0.0774647	0
ENSG00000011523	CEP68	protein_coding	Q76N32	0.114098	0.53133	0.317761	0.0432307	0
ENSG00000011566	MAP4K3	protein_coding	Q8IVH8	-0.395132	2.95965e-05	0.00145646	0.991766	0
ENSG00000011590	ZBTB32	protein_coding	Q9Y2Y4	0.564737	0.464699	1.63813	0.0113337	0
ENSG00000011600	TYROBP	protein_coding	O43914	0.999335	NA	1.51178	NA	0
ENSG00000011638	TMEM159	protein_coding	Q96B96	-0.223256	0.360637	-0.494147	0.111834	0
ENSG00000011677	GABRA3	protein_coding	P34903	-0.154807	NA	-0.629847	NA	0
ENSG00000012048	BRCA1	protein_coding	P38398	-0.59845	6.87369e-19	-0.317288	0.0185197	0
ENSG00000012061	ERCC1	protein_coding	P07992	0.453878	0.000316365	-0.271007	0.128142	0
ENSG00000012124	CD22	protein_coding	P20273	0.402198	NA	1.0285	NA	0
ENSG00000012171	SEMA3B	protein_coding	Q13214	1.85064	2.11319e-24	1.32242	9.23609e-15	0
ENSG00000012174	MBTPS2	protein_coding	O43462	-0.572911	2.076e-08	-0.414719	2.0307e-07	0
ENSG00000012211	PRICKLE3	protein_coding	O43900	0.157625	0.374096	0.164391	0.375377	0
ENSG00000012223	LTF	protein_coding	P02788	1.54542	NA	0.473484	NA	0
ENSG00000012232	EXTL3	protein_coding	O43909	0.22663	0.135664	0.541997	8.17821e-05	0
ENSG00000012504	NR1H4	protein_coding	Q96RI1	0.999335	NA	0.309879	NA	0
ENSG00000012660	ELOVL5	protein_coding	Q9NYP7	-0.450829	1.61024e-09	-0.552992	4.39067e-13	0
ENSG00000012779	ALOX5	protein_coding	P09917	NA	NA	NA	NA	0
ENSG00000012817	KDM5D	protein_coding	Q9BY66	-0.0872143	0.910761	0.853974	0.203074	0
ENSG00000012822	CALCOCO1	protein_coding	Q9P1Z2	0.394821	0.0309603	-0.611995	0.000516843	0
ENSG00000012963	UBR7	protein_coding	Q8N806	-1.0457	0.34904	-1.45706	0.103817	0
ENSG00000012983	MAP4K5	protein_coding	Q9Y4K4	-0.590637	2.91603e-07	-0.104019	0.474693	0
ENSG00000013016	EHD3	protein_coding	Q9NZN3	0.630966	0.0120024	0.494701	0.0276628	0
ENSG00000013275	PSMC4	protein_coding	P43686	-0.915191	0.0844978	-0.363186	0.486417	0
ENSG00000013288	MAN2B2	protein_coding	Q9Y2E5	0.899722	5.47461e-10	0.705128	6.27993e-08	0
ENSG00000013293	SLC7A14	protein_coding	Q8TBB6	NA	NA	NA	NA	0
ENSG00000013297	CLDN11	protein_coding	O75508	1.60639	0.401035	0.377041	0.848162	0
ENSG00000013306	SLC25A39	protein_coding	Q9BZJ4	0.880538	3.10521e-14	0.882316	1.04981e-08	1
ENSG00000013364	MVP	protein_coding	Q14764	0.633177	0.000925236	1.24435	7.12347e-10	0
ENSG00000013374	NUB1	protein_coding	Q9Y5A7	-0.680674	2.06559e-09	-1.15066	9.98519e-14	0
ENSG00000013375	PGM3	protein_coding	O95394	-0.862663	1.7354e-19	-0.650381	1.17222e-07	0
ENSG00000013392	RWDD2A	protein_coding	#N/A	-0.73703	1.0221e-06	-0.988628	2.34607e-11	0
ENSG00000013441	CLK1	protein_coding	P49759	-0.434924	6.5496e-07	-0.584195	2.70758e-08	0
ENSG00000013503	POLR3B	protein_coding	Q9NW08	-0.745498	6.58191e-11	-0.563076	0.00267094	0
ENSG00000013523	ANGEL1	protein_coding	Q9UNK9	0.2357	0.0452071	0.659489	7.59708e-09	0
ENSG00000013561	RNF14	protein_coding	Q9UBS8	-0.27512	0.0157517	-0.379079	2.64346e-05	0
ENSG00000013563	DNASE1L1	protein_coding	P49184	0.815868	5.09827e-06	1.19642	3.21151e-09	0
ENSG00000013573	DDX11	protein_coding	Q96FC9	2.07692	6.27815e-79	1.46633	8.57282e-31	0
ENSG00000013583	HEBP1	protein_coding	Q9NRV9	-0.374519	0.00065141	-0.829423	2.97635e-12	1
ENSG00000013588	GPRC5A	protein_coding	Q8NFJ5	-0.40693	0.0686435	-0.7036	9.82591e-06	0
ENSG00000013619	MAMLD1	protein_coding	Q13495	-0.264971	0.425482	-0.184372	0.560998	0
ENSG00000013725	CD6	protein_coding	P30203	-0.291521	NA	0.934708	NA	0
ENSG00000013810	TACC3	protein_coding	Q9Y6A5	0.234113	0.0109334	-0.25473	0.000449637	0
ENSG00000014123	UFL1	protein_coding	O94874	-0.525371	1.50214e-07	-0.524357	2.88374e-06	0
ENSG00000014138	POLA2	protein_coding	Q14181	-0.4131	0.000264747	-0.284266	0.113717	0
ENSG00000014164	ZC3H3	protein_coding	Q8IXZ2	0.832967	6.52353e-07	1.08173	2.17468e-10	0
ENSG00000014216	CAPN1	protein_coding	P07384	-0.308432	0.000241491	-0.434719	0.00523237	0
ENSG00000014257	ACPP	protein_coding	P15309	0.0846997	0.957485	-0.733489	0.432298	0
ENSG00000014641	MDH1	protein_coding	P40925	0.110347	0.598579	-0.812208	1.27864e-06	1
ENSG00000014824	SLC30A9	protein_coding	Q6PML9	-0.514924	2.26246e-11	-0.170809	0.108073	1
ENSG00000014914	MTMR11	protein_coding	A4FU01	0.621747	0.029938	1.65661	6.23048e-06	0
ENSG00000014919	COX15	protein_coding	Q7KZN9	-0.292164	0.134846	-0.249984	0.160709	1
ENSG00000015133	CCDC88C	protein_coding	Q9P219	0.766896	7.61455e-13	0.955952	9.49793e-17	0
ENSG00000015153	YAF2	protein_coding	Q8IY57	-0.736706	1.81178e-07	-0.645756	2.33974e-05	0
ENSG00000015171	ZMYND11	protein_coding	Q15326	0.153857	0.174549	0.176207	0.393842	0
ENSG00000015285	WAS	protein_coding	P42768	0.345606	0.319346	0.427158	0.166854	0
ENSG00000015413	DPEP1	protein_coding	P16444	0.0658931	0.952541	-0.344845	0.589648	0
ENSG00000015475	BID	protein_coding	P55957	-0.317711	0.0345169	-0.603358	1.30832e-07	1
ENSG00000015479	MATR3.2	protein_coding	#N/A	-0.159794	0.717855	0.560493	0.0796114	0
ENSG00000015520	NPC1L1	protein_coding	Q9UHC9	1.70485	5.6443e-10	1.99431	5.28903e-10	0
ENSG00000015532	XYLT2	protein_coding	Q9H1B5	0.575518	3.76058e-06	0.861358	3.80091e-10	0
ENSG00000015568	RGPD5	protein_coding	Q99666	-0.643941	0.104143	0.080612	0.876925	0
ENSG00000015592	STMN4	protein_coding	Q9H169	-0.392636	0.828783	-0.347394	0.822271	0
ENSG00000015676	NUDCD3	protein_coding	Q8IVD9	0.607241	7.58617e-08	0.198369	0.091616	0
ENSG00000016082	ISL1	protein_coding	P61371	-0.0961005	0.550982	-0.326331	0.00583569	0
ENSG00000016391	CHDH	protein_coding	Q8NE62	0.702575	1.46057e-08	1.01452	2.3987e-17	1
ENSG00000016402	IL20RA	protein_coding	Q9UHF4	NA	NA	0.357635	NA	0
ENSG00000016490	CLCA1	protein_coding	A8K7I4	NA	NA	NA	NA	0
ENSG00000016602	CLCA4	protein_coding	Q14CN2	NA	NA	0.357635	NA	0
ENSG00000016864	GLT8D1	protein_coding	Q68CQ7	-0.393674	0.0100598	-0.366033	0.00887739	0
ENSG00000017260	ATP2C1	protein_coding	P98194	-0.468857	1.68772e-09	-0.790159	1.61252e-13	0
ENSG00000017427	IGF1	protein_coding	P05019	-0.154807	NA	NA	NA	0
ENSG00000017483	SLC38A5	protein_coding	Q8WUX1	1.12229	0.2124	1.47905	0.0475763	0
ENSG00000017797	RALBP1	protein_coding	Q15311	0.122491	0.641438	-0.097668	0.661117	0
ENSG00000018189	RUFY3	protein_coding	Q7L099	-0.0988525	0.396251	-0.0633997	0.661849	0
ENSG00000018236	CNTN1	protein_coding	Q12860	-0.99769	1.28153e-11	-0.607912	2.45773e-05	0
ENSG00000018280	SLC11A1	protein_coding	P49279	-0.389507	0.679407	0.576046	0.541978	0
ENSG00000018408	WWTR1	protein_coding	Q9GZV5	0.930734	0.000250221	-0.00974818	0.975385	0
ENSG00000018510	AGPS	protein_coding	O00116	-1.04115	1.31101e-28	-0.887796	6.09484e-13	0
ENSG00000018607	ZNF806	unprocessed_pseudogene	P0C7X5	1.4158	NA	-0.0946142	NA	0
ENSG00000018610	CXorf56	protein_coding	Q9H5V9	-0.347636	0.00177408	-0.775221	3.34507e-17	0
ENSG00000018625	ATP1A2	protein_coding	P50993	0.0496324	NA	0.151241	NA	0
ENSG00000018699	TTC27	protein_coding	Q6P3X3	-0.43264	0.0103905	0.0498357	0.842784	0
ENSG00000018869	ZNF582	protein_coding	Q96NG8	0.623068	0.00410328	-0.22406	0.185963	0
ENSG00000019102	VSIG2	protein_coding	Q96IQ7	0.851155	0.167792	1.96464	0.00333938	0
ENSG00000019144	PHLDB1	protein_coding	Q86UU1	0.1475	0.351888	0.0477687	0.788773	0
ENSG00000019169	MARCO	protein_coding	Q9UEW3	-1.08234	NA	NA	NA	0
ENSG00000019186	CYP24A1	protein_coding	Q07973	-0.020769	NA	-0.913986	NA	1
ENSG00000019485	PRDM11	protein_coding	Q9NQV5	0.310033	0.328872	0.826037	0.00266062	0
ENSG00000019505	SYT13	protein_coding	Q7L8C5	0.841133	0.500995	0.483589	0.634054	0
ENSG00000019549	SNAI2	protein_coding	O43623	-0.247947	0.168442	-0.36415	0.0262957	0
ENSG00000019582	CD74	protein_coding	P04233	0.096504	0.925155	0.778658	0.298654	0
ENSG00000019991	HGF	protein_coding	P14210	-0.0648923	NA	-1.28814	NA	0
ENSG00000019995	ZRANB1	protein_coding	Q9UGI0	0.0877393	0.524516	-0.0347844	0.82473	0
ENSG00000020129	NCDN	protein_coding	Q9UBB6	0.109552	0.420023	0.0327171	0.812413	0
ENSG00000020181	ADGRA2	protein_coding	Q96PE1	1.31997	9.38098e-11	1.62327	7.4426e-14	0
ENSG00000020219	CCT8L1P	processed_pseudogene	A6NM43	-0.937582	0.490242	0.316957	0.84666	0
ENSG00000020256	ZFP64	protein_coding	Q9NPA5	-0.389639	0.00193912	-0.279934	0.0257505	0
ENSG00000020426	MNAT1	protein_coding	P51948	-0.693544	5.95277e-12	-0.745166	8.21372e-17	0
ENSG00000020577	SAMD4A	protein_coding	Q9UPU9	0.886206	8.43383e-07	1.04015	1.9718e-07	0
ENSG00000020633	RUNX3	protein_coding	Q13761	0.763337	0.00593115	1.21893	4.71149e-08	0
ENSG00000020922	MRE11	protein_coding	P49959	-0.928378	1.80049e-31	-0.53197	0.00361159	0
ENSG00000021300	PLEKHB1	protein_coding	Q9UF11	-0.0769926	0.829112	-1.03789	2.37364e-06	0
ENSG00000021355	SERPINB1	protein_coding	P30740	-0.485563	4.52408e-07	-0.646998	2.32148e-12	0
ENSG00000021461	CYP3A43	protein_coding	Q9HB55	0.932221	NA	1.4463	NA	0
ENSG00000021488	SLC7A9	protein_coding	P82251	0.389751	0.715286	2.13364	0.00488628	0
ENSG00000021574	SPAST	protein_coding	Q9UBP0	-0.557417	2.48989e-07	-0.443537	0.000191437	0
ENSG00000021645	NRXN3	protein_coding	Q9Y4C0	-0.106692	0.676601	0.0816506	0.731175	0
ENSG00000021762	OSBPL5	protein_coding	Q9H0X9	1.35105	2.68066e-15	0.885245	8.77915e-09	0
ENSG00000021776	AQR	protein_coding	O60306	-0.0227878	0.832375	0.291884	0.00140829	0
ENSG00000021826	CPS1	protein_coding	P31327	-0.630907	6.83593e-06	-0.0169134	0.918703	1
ENSG00000021852	C8B	protein_coding	P07358	NA	NA	NA	NA	0
ENSG00000022267	FHL1	protein_coding	Q13642	-0.279595	0.00325152	-0.719413	8.16998e-25	0
ENSG00000022277	RTFDC1	protein_coding	Q9BY42	-0.452383	2.99501e-05	-0.766481	2.34285e-11	0
ENSG00000022355	GABRA1	protein_coding	P14867	NA	NA	NA	NA	0
ENSG00000022556	NLRP2	protein_coding	Q9NX02	NA	NA	NA	NA	0
ENSG00000022567	SLC45A4	protein_coding	Q5BKX6	0.706046	9.77048e-10	1.06487	3.28341e-12	0
ENSG00000022840	RNF10	protein_coding	Q8N5U6	0.457075	4.77603e-07	0.790415	1.68018e-14	0
ENSG00000022976	ZNF839	protein_coding	A8K0R7	0.436964	0.000302821	0.722967	5.48705e-10	0
ENSG00000023041	ZDHHC6	protein_coding	Q9H6R6	0.893581	3.20006e-13	0.771783	2.00833e-09	0
ENSG00000023171	GRAMD1B	protein_coding	Q3KR37	0.294541	0.0651685	0.548272	0.000893567	0
ENSG00000023191	RNH1	protein_coding	P13489	0.950909	0.509973	-2.79586	0.00949561	0
ENSG00000023228	NDUFS1	protein_coding	P28331	-1.96998	6.50208e-06	-2.2994	1.63708e-05	1
ENSG00000023287	RB1CC1	protein_coding	Q8TDY2	-0.401722	1.08549e-06	-0.32394	0.0120552	0
ENSG00000023318	ERP44	protein_coding	Q9BS26	-0.167396	0.311005	-0.563262	4.46124e-05	0
ENSG00000023330	ALAS1	protein_coding	P13196	0.110846	0.328923	-0.70253	2.01994e-10	1
ENSG00000023445	BIRC3	protein_coding	Q13489	-0.556488	0.778719	0.398924	0.860265	0
ENSG00000023516	AKAP11	protein_coding	Q9UKA4	-0.575449	3.21092e-13	-0.214523	0.00660019	0
ENSG00000023572	GLRX2	protein_coding	Q9NS18	-0.818404	2.40895e-12	-1.1255	2.20383e-13	1
ENSG00000023608	SNAPC1	protein_coding	Q16533	-0.0987758	0.758889	-0.854975	0.000679651	0
ENSG00000023697	DERA	protein_coding	Q9Y315	-0.139283	0.31931	-0.471662	0.00018822	0
ENSG00000023734	STRAP	protein_coding	Q9Y3F4	-0.276879	0.00981722	-0.243938	0.0402365	0
ENSG00000023839	ABCC2	protein_coding	Q92887	1.19862	6.9121e-05	1.76409	1.24445e-06	0
ENSG00000023892	DEF6	protein_coding	Q9H4E7	0.162031	0.591418	0.349158	0.14866	0
ENSG00000023902	PLEKHO1	protein_coding	Q53GL0	0.284628	0.0430768	0.289313	0.0404088	0
ENSG00000023909	GCLM	protein_coding	P48507	-1.10773	3.13609e-17	-0.691487	7.70209e-07	0
ENSG00000024048	UBR2	protein_coding	Q8IWV8	-0.412363	8.4763e-07	-0.0283223	0.899915	0
ENSG00000024422	EHD2	protein_coding	Q9NZN4	0.399523	0.0437576	-0.0588742	0.846007	0
ENSG00000024526	DEPDC1	protein_coding	Q5TB30	-0.598958	1.8918e-06	-0.406246	0.00159594	0
ENSG00000024862	CCDC28A	protein_coding	Q8IWP9	-0.246861	0.283757	-0.859263	8.4982e-08	0
ENSG00000025039	RRAGD	protein_coding	Q9NQL2	0.126755	0.53133	0.385634	0.0706642	0
ENSG00000025156	HSF2	protein_coding	Q03933	-0.577024	2.43896e-08	-0.673451	6.70064e-10	0
ENSG00000025293	PHF20	protein_coding	Q9BVI0	-0.0170263	0.93097	0.0355144	0.874693	0
ENSG00000025423	HSD17B6	protein_coding	O14756	-0.444803	0.0221532	-0.612821	0.00191788	0
ENSG00000025434	NR1H3	protein_coding	Q13133	0.875998	9.22458e-07	0.63165	0.000115319	0
ENSG00000025708	TYMP	protein_coding	P19971	0.725691	0.0655625	1.483	4.28951e-05	0
ENSG00000025770	NCAPH2	protein_coding	Q6IBW4	0.590341	1.53784e-10	0.34596	0.00020045	0
ENSG00000025772	TOMM34	protein_coding	Q15785	-0.461289	5.52685e-06	-1.13834	2.18461e-21	1
ENSG00000025796	SEC63	protein_coding	Q9UGP8	-0.49175	3.12669e-06	-0.154545	0.196564	0
ENSG00000025800	KPNA6	protein_coding	O60684	-0.192458	0.0993001	-0.307909	0.00668526	0
ENSG00000026025	VIM	protein_coding	P08670	-0.927316	2.85956e-17	-0.840947	1.09754e-12	0
ENSG00000026036	RTEL1-TNFRSF6B	protein_coding	F6WH68	2.30291	1.79792e-11	2.38979	1.69295e-12	0
ENSG00000026103	FAS	protein_coding	P25445	-0.906022	4.40181e-06	-0.566096	0.0352663	0
ENSG00000026297	RNASET2	protein_coding	O00584	-0.194196	0.364195	-0.559167	0.000170075	0
ENSG00000026508	CD44	protein_coding	P16070	-0.0432068	0.971571	-1.02741	0.220925	0
ENSG00000026559	KCNG1	protein_coding	Q9UIX4	0.855356	5.38497e-05	0.519339	0.0131798	0
ENSG00000026652	AGPAT4	protein_coding	Q9NRZ5	1.138	8.68566e-44	0.582769	3.89863e-05	0
ENSG00000026751	SLAMF7	protein_coding	Q9NQ25	0.460889	NA	2.29494	NA	0
ENSG00000026950	BTN3A1	protein_coding	O00481	-0.114348	0.716762	0.133564	0.673074	0
ENSG00000027001	MIPEP	protein_coding	Q99797	-0.462939	0.00123541	-0.257521	0.10393	1
ENSG00000027075	PRKCH	protein_coding	P24723	0.559821	0.0177351	0.809386	7.54257e-05	0
ENSG00000027644	INSRR	protein_coding	P14616	-0.492784	0.671763	-0.295208	0.783381	0
ENSG00000027697	IFNGR1	protein_coding	P15260	-0.536788	4.91591e-08	-0.831935	1.08072e-31	0
ENSG00000027847	B4GALT7	protein_coding	Q9UBV7	1.0988	5.76972e-18	0.842307	1.28769e-13	0
ENSG00000027869	SH2D2A	protein_coding	Q9NP31	0.161063	0.669476	0.0537335	0.862321	0
ENSG00000028116	VRK2	protein_coding	Q86Y07	-0.665202	1.00981e-08	-0.417994	0.00923277	0
ENSG00000028137	TNFRSF1B	protein_coding	P20333	-1.51617	0.194648	0.272761	0.864156	0
ENSG00000028203	VEZT	protein_coding	Q9HBM0	-0.504183	0.000199196	-0.087324	0.555578	0
ENSG00000028277	POU2F2	protein_coding	P09086	1.19004	0.000197079	0.961509	0.00060901	0
ENSG00000028310	BRD9	protein_coding	Q9H8M2	0.878977	1.09244e-26	1.03483	8.53882e-29	0
ENSG00000028528	SNX1	protein_coding	Q13596	-0.132913	0.468526	-0.257549	0.107591	0
ENSG00000028839	TBPL1	protein_coding	P62380	-0.220027	0.0805954	-0.483241	1.51309e-06	0
ENSG00000029153	ARNTL2	protein_coding	Q8WYA1	-0.410486	0.101052	0.716886	0.000649596	0
ENSG00000029363	BCLAF1	protein_coding	Q9NYF8	-0.0309502	0.814243	-0.209085	0.0476518	0
ENSG00000029364	SLC39A9	protein_coding	Q9NUM3	0.284279	0.0255619	-0.180858	0.362334	0
ENSG00000029534	ANK1	protein_coding	P16157	0.484209	0.017978	0.349583	0.244689	0
ENSG00000029559	IBSP	protein_coding	P21815	NA	NA	NA	NA	0
ENSG00000029639	TFB1M	protein_coding	Q8WVM0	-0.844197	3.79134e-21	-0.651642	2.02224e-11	1
ENSG00000029725	RABEP1	protein_coding	Q15276	0.104673	0.287596	0.0327996	0.856219	0
ENSG00000029993	HMGB3	protein_coding	O15347	0.028928	0.902605	-0.785595	5.12432e-10	0
ENSG00000030066	NUP160	protein_coding	Q12769	-0.955775	1.59138e-33	-0.372517	0.0137304	0
ENSG00000030110	BAK1	protein_coding	Q16611	0.0444865	0.813363	-0.558195	0.000246297	1
ENSG00000030304	MUSK	protein_coding	O15146	0.740794	NA	1.93405	NA	0
ENSG00000030419	IKZF2	protein_coding	Q9UKS7	-0.0518913	0.886538	-0.320993	0.286907	0
ENSG00000030582	GRN	protein_coding	P28799	0.599027	5.12338e-14	-0.515059	8.08364e-08	0
ENSG00000031003	FAM13B	protein_coding	Q9NYF5	0.218895	0.196914	0.841201	4.2901e-08	0
ENSG00000031081	ARHGAP31	protein_coding	Q2M1Z3	-0.183841	0.524371	0.0302208	0.924217	0
ENSG00000031691	CENPQ	protein_coding	Q7L2Z9	-0.869323	1.15674e-12	-1.15372	4.75253e-26	0
ENSG00000031698	SARS	protein_coding	P49591	-0.20725	0.20261	-0.866928	1.2316e-08	0
ENSG00000031823	RANBP3	protein_coding	Q9H6Z4	0.7962	2.22612e-13	0.695403	1.5988e-10	0
ENSG00000032219	ARID4A	protein_coding	P29374	0.0361146	0.830508	0.290004	0.00240658	0
ENSG00000032389	TSSC1	protein_coding	#N/A	1.10069	6.90553e-43	0.592344	3.90506e-16	0
ENSG00000032444	PNPLA6	protein_coding	Q8IY17	0.554383	3.27953e-05	1.03996	2.49019e-20	0
ENSG00000032742	IFT88	protein_coding	Q13099	-1.04133	3.0372e-11	-0.539069	0.00174483	0
ENSG00000033011	ALG1	protein_coding	Q9BT22	-0.175838	0.311287	-0.578931	7.39092e-07	0
ENSG00000033030	ZCCHC8	protein_coding	Q6NZY4	-0.0312017	0.908526	0.442611	2.35324e-07	0
ENSG00000033050	ABCF2	protein_coding	Q9UG63	0.207811	0.00476413	0.147519	0.249178	1
ENSG00000033100	CHPF2	protein_coding	Q9P2E5	0.48511	3.9357e-06	0.938925	2.84163e-16	0
ENSG00000033122	LRRC7	protein_coding	Q96NW7	-0.793645	NA	0.59228	NA	0
ENSG00000033170	FUT8	protein_coding	Q9BYC5	0.201977	0.231384	0.0787331	0.707435	0
ENSG00000033178	UBA6	protein_coding	A0AVT1	-0.952955	2.29655e-14	-0.59532	3.33999e-05	0
ENSG00000033327	GAB2	protein_coding	Q9UQC2	0.65725	0.000158566	0.811736	9.28681e-08	0
ENSG00000033627	ATP6V0A1	protein_coding	Q93050	-0.0117786	0.901684	-0.187114	0.0977471	0
ENSG00000033800	PIAS1	protein_coding	O75925	-0.288732	0.0642952	-0.449165	0.00150696	0
ENSG00000033867	SLC4A7	protein_coding	Q9Y6M7	-0.425911	6.47228e-08	-0.309826	0.0234629	0
ENSG00000034053	APBA2	protein_coding	Q99767	0.394272	0.782538	-0.410115	0.62999	0
ENSG00000034152	MAP2K3	protein_coding	P46734	0.134374	0.461572	-0.150557	0.427013	0
ENSG00000034239	EFCAB1	protein_coding	Q9HAE3	-0.763218	0.703606	-0.233003	0.910549	0
ENSG00000034510	TMSB10	protein_coding	P63313	-0.416773	9.82178e-05	-0.449538	0.00014493	0
ENSG00000034533	ASTE1	protein_coding	Q2TB18	-0.443221	0.000248129	-0.117489	0.432346	0
ENSG00000034677	RNF19A	protein_coding	Q9NV58	-0.434911	0.000219038	-0.0637175	0.682242	0
ENSG00000034693	PEX3	protein_coding	P56589	-1.11796	4.53819e-35	-0.744064	6.32637e-08	0
ENSG00000034713	GABARAPL2	protein_coding	P60520	-0.483385	1.35177e-09	-1.00311	3.12219e-41	0
ENSG00000034971	MYOC	protein_coding	Q99972	-1.84012	NA	NA	NA	0
ENSG00000035115	SH3YL1	protein_coding	Q96HL8	-0.0769199	0.803824	0.558907	0.0178085	0
ENSG00000035141	FAM136A	protein_coding	Q96C01	-0.212496	0.163631	-0.0407671	0.815269	1
ENSG00000035403	VCL	protein_coding	P18206	-0.509925	1.06516e-13	-0.606133	0.000705043	0
ENSG00000035499	DEPDC1B	protein_coding	Q8WUY9	-0.485945	3.27477e-06	-0.871911	4.85631e-21	0
ENSG00000035664	DAPK2	protein_coding	Q9UIK4	-0.494813	0.473185	-0.352484	0.589828	0
ENSG00000035681	NSMAF	protein_coding	Q92636	-0.537269	3.2847e-05	-0.282848	0.150742	0
ENSG00000035687	ADSS	protein_coding	P30520	-0.853068	5.37526e-19	-0.606534	8.2861e-08	0
ENSG00000035720	STAP1	protein_coding	Q9ULZ2	-0.132314	NA	0.0159578	0.993262	0
ENSG00000035862	TIMP2	protein_coding	P16035	1.0386	1.97692e-08	-0.585005	0.0115038	0
ENSG00000035928	RFC1	protein_coding	P35251	-0.262797	0.00156206	-0.031452	0.841796	0
ENSG00000036054	TBC1D23	protein_coding	Q9NUY8	-0.698711	1.48841e-11	-0.491375	5.12617e-07	0
ENSG00000036257	CUL3	protein_coding	Q13618	-0.542672	2.66188e-06	-0.374581	2.76968e-05	0
ENSG00000036448	MYOM2	protein_coding	P54296	-1.43455	0.408258	-1.62417	0.281232	0
ENSG00000036473	OTC	protein_coding	P00480	-0.154807	NA	0.357635	NA	1
ENSG00000036530	CYP46A1	protein_coding	Q9Y6A2	2.02006	0.00804282	0.966749	0.0995312	0
ENSG00000036549	ZZZ3	protein_coding	Q8IYH5	-0.3951	0.0012464	-0.0960116	0.484849	0
ENSG00000036565	SLC18A1	protein_coding	P54219	0.999335	NA	1.51178	NA	0
ENSG00000036672	USP2	protein_coding	O75604	0.0303722	0.879374	-0.417605	0.0650906	0
ENSG00000036828	CASR.1	protein_coding	#N/A	-0.154807	NA	NA	NA	0
ENSG00000037042	TUBG2	protein_coding	Q9NRH3	0.273091	0.270755	0.53517	0.00330236	0
ENSG00000037241	RPL26L1	protein_coding	Q9UNX3	-1.1915	4.16225e-12	-1.05164	7.95649e-18	0
ENSG00000037280	FLT4	protein_coding	P35916	1.43107	1.74998e-77	0.886732	3.25221e-19	0
ENSG00000037474	NSUN2	protein_coding	Q08J23	-0.0156618	0.871543	-0.298171	0.000199615	0
ENSG00000037637	FBXO42	protein_coding	Q6P3S6	0.302329	0.00353858	0.323918	0.00616795	0
ENSG00000037749	MFAP3	protein_coding	P55082	-0.395542	0.0273334	-0.782887	5.74395e-14	0
ENSG00000037757	MRI1	protein_coding	Q9BV20	0.787937	1.25925e-23	0.71662	3.57042e-21	0
ENSG00000037897	METTL1	protein_coding	Q9UBP6	0.73911	3.39682e-06	0.414715	0.00180849	0
ENSG00000037965	HOXC8	protein_coding	P31273	0.502532	0.0978582	0.500681	0.0539961	0
ENSG00000038002	AGA	protein_coding	P20933	-0.305882	0.00685104	-0.723613	2.84068e-10	0
ENSG00000038210	PI4K2B	protein_coding	Q8TCG2	1.14193	6.34844e-07	1.18836	3.19347e-07	0
ENSG00000038219	BOD1L1	protein_coding	Q8NFC6	-0.28717	0.000298548	-0.230344	0.00363269	0
ENSG00000038274	MAT2B	protein_coding	Q9NZL9	-0.741722	1.87269e-12	-0.92061	2.74296e-18	0
ENSG00000038295	TLL1	protein_coding	O43897	-0.389771	0.134281	-0.414732	0.295483	0
ENSG00000038358	EDC4	protein_coding	Q6P2E9	-0.144312	0.171579	-0.0250376	0.908712	0
ENSG00000038382	TRIO	protein_coding	O75962	0.531091	0.000239135	1.08184	2.73726e-15	0
ENSG00000038427	VCAN	protein_coding	P13611	-0.631231	2.56349e-17	-0.478791	4.57259e-05	0
ENSG00000038532	CLEC16A	protein_coding	Q2KHT3	0.420319	0.000339328	0.25616	0.156724	0
ENSG00000038945	MSR1	protein_coding	P21757	NA	NA	NA	NA	0
ENSG00000039068	CDH1	protein_coding	P12830	-0.578355	0.108141	-0.601744	0.0854404	0
ENSG00000039123	SKIV2L2	protein_coding	#N/A	-1.10962	4.55982e-34	-0.650321	0.00483772	0
ENSG00000039139	DNAH5	protein_coding	Q8TE73	-1.05481	0.285265	-0.0591645	0.959062	0
ENSG00000039319	ZFYVE16	protein_coding	Q7Z3T8	-1.17544	1.53859e-29	-0.724612	1.62469e-05	0
ENSG00000039523	FAM65A	protein_coding	#N/A	1.25658	0.00213543	2.06066	1.03627e-06	0
ENSG00000039537	C6	protein_coding	P13671	NA	NA	0.357635	NA	0
ENSG00000039560	RAI14	protein_coding	Q9P0K7	-1.0918	4.09487e-37	-0.858796	5.36472e-13	0
ENSG00000039600	SOX30	protein_coding	O94993	-0.262111	0.781321	-0.197449	0.805948	0
ENSG00000039650	PNKP	protein_coding	Q96T60	0.838352	4.90678e-14	0.717573	1.08501e-14	0
ENSG00000039987	BEST2	protein_coding	Q8NFU1	1.28386	0.0123365	1.32009	0.00313541	0
ENSG00000040199	PHLPP2	protein_coding	Q6ZVD8	0.322374	0.00223246	0.637388	3.37743e-07	0
ENSG00000040275	SPDL1	protein_coding	Q96EA4	-0.579226	4.72197e-22	-0.604693	1.04556e-14	0
ENSG00000040341	STAU2	protein_coding	Q9NUL3	-0.543207	2.33805e-06	-0.490676	4.74842e-06	0
ENSG00000040487	PQLC2	protein_coding	Q6ZP29	0.707154	1.65531e-11	0.425714	1.26385e-05	0
ENSG00000040531	CTNS	protein_coding	O60931	0.380018	0.00355229	0.330631	0.00130516	0
ENSG00000040608	RTN4R	protein_coding	Q9BZR6	0.581837	0.0275455	0.670976	0.0162167	0
ENSG00000040633	PHF23	protein_coding	Q9BUL5	0.182549	0.138524	0.196555	0.106588	0
ENSG00000040731	CDH10	protein_coding	Q9Y6N8	-0.859731	0.256437	-0.581975	0.392177	0
ENSG00000040933	INPP4A	protein_coding	Q96PE3	0.680094	2.61069e-06	1.00285	2.9764e-13	0
ENSG00000041353	RAB27B	protein_coding	O00194	0.587261	NA	-1.71729	0.304789	0
ENSG00000041357	PSMA4	protein_coding	P25789	0.0102163	0.95792	-0.594598	4.54733e-05	0
ENSG00000041515	MYO16	protein_coding	Q9Y6X6	NA	NA	0.357635	NA	0
ENSG00000041802	LSG1	protein_coding	Q9H089	0.14563	0.13345	-0.0752626	0.483937	0
ENSG00000041880	PARP3	protein_coding	Q9Y6F1	0.80066	1.06687e-07	0.673375	0.000198303	0
ENSG00000041982	TNC	protein_coding	P24821	0.19951	0.538773	0.144727	0.649337	0
ENSG00000041988	THAP3	protein_coding	Q8WTV1	0.327416	0.0521183	0.224624	0.193052	0
ENSG00000042062	FAM65C	protein_coding	#N/A	-0.322392	0.774229	1.68097	0.115527	0
ENSG00000042088	TDP1	protein_coding	Q9NUW8	-0.231315	0.0254173	0.0110957	0.932481	0
ENSG00000042286	AIFM2	protein_coding	Q9BRQ8	0.942788	2.78219e-08	-0.0911841	0.622981	1
ENSG00000042304	C2orf83	protein_coding	Q53S99	-0.872776	NA	NA	NA	0
ENSG00000042317	SPATA7	protein_coding	Q9P0W8	-0.892948	7.18414e-07	-0.568333	0.000845244	0
ENSG00000042429	MED17	protein_coding	A0A1W2PRB8	-0.495153	6.02617e-11	-0.610183	3.80326e-11	0
ENSG00000042445	RETSAT	protein_coding	Q6NUM9	0.343876	0.0505325	0.327202	0.0767535	0
ENSG00000042493	CAPG	protein_coding	P40121	0.36927	0.0231302	-0.20914	0.270724	0
ENSG00000042753	AP2S1	protein_coding	P53680	-0.0774209	0.61998	-0.681519	7.4418e-11	0
ENSG00000042781	USH2A	protein_coding	O75445	-0.834129	0.666026	0.495609	0.81618	0
ENSG00000042813	ZPBP	protein_coding	Q9BS86	NA	NA	-0.268108	NA	0
ENSG00000042832	TG	protein_coding	P01266	0.567507	0.555966	1.19879	0.22839	0
ENSG00000042980	ADAM28	protein_coding	Q9UKQ2	NA	NA	NA	NA	0
ENSG00000043039	BARX2	protein_coding	Q9UMQ3	0.357956	0.195839	0.0920649	0.764265	0
ENSG00000043093	DCUN1D1	protein_coding	Q96GG9	-1.11767	6.16381e-21	-1.05513	7.31576e-11	0
ENSG00000043143	JADE2	protein_coding	Q9NQC1	0.775571	5.12078e-06	0.509384	0.00424786	0
ENSG00000043355	ZIC2	protein_coding	O95409	0.824588	7.67377e-25	0.614948	3.01929e-19	0
ENSG00000043462	LCP2	protein_coding	Q13094	0.932221	NA	0.139528	NA	0
ENSG00000043514	TRIT1	protein_coding	Q9H3H1	0.276447	0.0253818	0.408862	3.88543e-05	1
ENSG00000043591	ADRB1	protein_coding	P08588	0.64859	0.446943	1.36036	0.0599992	0
ENSG00000044012	GUCA2B	protein_coding	Q16661	NA	NA	NA	NA	0
ENSG00000044090	CUL7	protein_coding	Q14999	0.806651	6.54976e-13	0.939011	4.89356e-20	0
ENSG00000044115	CTNNA1	protein_coding	P35221	-0.521191	8.89317e-06	-0.809264	0.000431556	0
ENSG00000044446	PHKA2	protein_coding	P46019	0.289691	0.0175041	0.632308	2.8521e-06	0
ENSG00000044459	CNTLN	protein_coding	Q9NXG0	-0.499716	4.23842e-05	-0.360957	0.0109581	0
ENSG00000044524	EPHA3	protein_coding	P29320	-0.557802	0.0011151	-0.561413	0.00355523	0
ENSG00000044574	HSPA5	protein_coding	P11021	0.607021	3.37804e-12	-0.488041	7.20679e-12	0
ENSG00000046604	DSG2	protein_coding	Q14126	-0.863993	5.12674e-29	-0.863455	1.43247e-19	0
ENSG00000046647	GEMIN8	protein_coding	Q9NWZ8	-0.189447	0.232233	-0.251337	0.0969871	0
ENSG00000046651	OFD1	protein_coding	O75665	-0.283716	0.0381828	0.361635	0.0133381	0
ENSG00000046653	GPM6B	protein_coding	Q13491	-0.358648	0.0158616	-0.342179	0.00852099	0
ENSG00000046774	MAGEC2	protein_coding	Q9UBF1	-0.563045	NA	-1.56825	0.334055	0
ENSG00000046889	PREX2	protein_coding	Q70Z35	-0.508536	0.00207864	0.0246038	0.920022	0
ENSG00000047056	WDR37	protein_coding	Q9Y2I8	0.412018	0.00326279	0.826759	9.46196e-09	0
ENSG00000047188	YTHDC2	protein_coding	Q9H6S0	-0.69563	1.57603e-11	-0.237306	0.277154	0
ENSG00000047230	CTPS2	protein_coding	Q9NRF8	-0.737876	2.18977e-15	-0.351455	0.0304455	0
ENSG00000047249	ATP6V1H	protein_coding	Q9UI12	-0.786328	2.01157e-18	-0.759915	5.27329e-14	0
ENSG00000047315	POLR2B	protein_coding	P30876	-1.06223	1.74943e-49	-0.609649	1.49197e-12	0
ENSG00000047346	FAM214A	protein_coding	Q32MH5	0.0970476	0.577826	-0.158524	0.360382	0
ENSG00000047365	ARAP2	protein_coding	Q8WZ64	-0.530307	0.00136988	-0.13469	0.509853	0
ENSG00000047410	TPR	protein_coding	P12270	-0.278676	0.00644382	0.0813186	0.502362	0
ENSG00000047457	CP	protein_coding	P00450	-0.240819	0.909375	-0.0671398	0.973776	0
ENSG00000047578	KIAA0556	protein_coding	O60303	0.484443	0.000429495	0.719441	2.13085e-06	0
ENSG00000047579	DTNBP1	protein_coding	Q96EV8	-0.075165	0.673029	-0.392161	0.00190056	0
ENSG00000047597	XK	protein_coding	P51811	-0.069858	0.88551	0.130654	0.757158	0
ENSG00000047617	ANO2	protein_coding	Q9NQ90	1.27405	0.308811	1.22256	0.273955	0
ENSG00000047621	C12orf4	protein_coding	Q9NQ89	-0.27114	0.0482848	-0.0388322	0.798912	0
ENSG00000047634	SCML1	protein_coding	Q9UN30	-0.325522	0.134694	-0.455026	0.0126386	0
ENSG00000047644	WWC3	protein_coding	Q9ULE0	1.6651	0.36055	0.835306	0.519548	0
ENSG00000047648	ARHGAP6	protein_coding	O43182	2.99182	NA	0.606385	0.679031	0
ENSG00000047662	FAM184B	protein_coding	#N/A	0.957908	0.0026594	1.2229	0.000940391	0
ENSG00000047849	MAP4	protein_coding	P27816	-0.406215	8.25067e-05	-0.549598	1.40812e-07	0
ENSG00000047932	GOPC	protein_coding	Q9HD26	-0.29506	0.002142	-0.462519	2.6018e-07	0
ENSG00000047936	ROS1	protein_coding	P08922	1.17543	NA	1.68674	NA	0
ENSG00000048028	USP28	protein_coding	Q96RU2	-0.474497	4.68382e-09	-0.0660486	0.618956	0
ENSG00000048052	HDAC9	protein_coding	Q9UKV0	-0.130421	0.871825	-0.0931192	0.886721	0
ENSG00000048140	TSPAN17	protein_coding	Q96FV3	0.612528	1.14853e-06	1.16094	3.83033e-24	0
ENSG00000048162	NOP16	protein_coding	Q9Y3C1	-0.51014	0.00487737	-0.588248	7.35156e-06	0
ENSG00000048342	CC2D2A	protein_coding	Q9P2K1	-0.391532	0.00971948	-0.168998	0.587502	0
ENSG00000048392	RRM2B	protein_coding	Q7LG56	-0.761368	3.05364e-10	-0.493396	0.00144469	0
ENSG00000048405	ZNF800	protein_coding	Q2TB10	-0.164029	0.245466	0.149194	0.245823	0
ENSG00000048462	TNFRSF17	protein_coding	Q02223	1.70502	0.312831	2.66778	0.0835234	0
ENSG00000048471	SNX29	protein_coding	Q8TEQ0	0.414638	0.00185784	0.468025	0.000377986	0
ENSG00000048540	LMO3	protein_coding	Q8TAP4	-0.154807	NA	-0.142386	NA	0
ENSG00000048544	MRPS10	protein_coding	P82664	-0.745167	1.76994e-15	-0.875469	1.14432e-21	1
ENSG00000048545	GUCA1A	protein_coding	P43080	NA	NA	NA	NA	0
ENSG00000048649	RSF1	protein_coding	Q96T23	-0.323831	0.000662678	-0.251288	0.0101539	0
ENSG00000048707	VPS13D	protein_coding	Q5THJ4	0.183119	0.131727	0.824937	1.27116e-13	0
ENSG00000048740	CELF2	protein_coding	O95319	-0.410394	0.00290631	-0.541409	0.000589382	0
ENSG00000048828	FAM120A	protein_coding	Q9NZB2	0.173654	0.0737057	0.372836	2.08179e-05	0
ENSG00000048991	R3HDM1	protein_coding	Q15032	-0.591946	0.000275821	-0.0754749	0.649714	0
ENSG00000049089	COL9A2	protein_coding	Q14055	1.12584	0.0615177	1.16864	0.031454	0
ENSG00000049130	KITLG	protein_coding	P21583	-0.589144	0.000293281	-0.106491	0.642721	0
ENSG00000049167	ERCC8	protein_coding	Q13216	-0.244738	0.200973	-0.160705	0.324018	0
ENSG00000049192	ADAMTS6	protein_coding	Q9UKP5	0.287621	0.505143	0.995215	0.0030858	0
ENSG00000049239	H6PD	protein_coding	O95479	0.392356	0.0146238	0.842689	3.14003e-08	0
ENSG00000049245	VAMP3	protein_coding	Q15836	-0.76248	3.35871e-12	-0.753071	4.5136e-10	0
ENSG00000049246	PER3	protein_coding	P56645	0.49876	0.0937647	0.606562	0.0153414	0
ENSG00000049247	UTS2	protein_coding	O95399	-0.780414	0.644861	-0.564339	0.719746	0
ENSG00000049249	TNFRSF9	protein_coding	Q07011	0.23497	0.684804	-0.193094	0.731184	0
ENSG00000049283	EPN3	protein_coding	Q9H201	1.39548	0.0464531	1.26049	0.0469313	0
ENSG00000049323	LTBP1	protein_coding	Q14766	-0.316102	0.00362794	-0.164192	0.354884	0
ENSG00000049449	RCN1	protein_coding	Q15293	-0.370694	0.00444176	-0.75464	4.36855e-06	0
ENSG00000049540	ELN	protein_coding	P15502	1.70006	NA	1.62191	NA	0
ENSG00000049541	RFC2	protein_coding	P35250	-0.614303	2.88635e-15	-0.636552	2.92365e-16	0
ENSG00000049618	ARID1B	protein_coding	Q8NFD5	0.292246	0.0171926	0.4435	2.97589e-05	0
ENSG00000049656	CLPTM1L	protein_coding	Q96KA5	0.877628	2.49194e-05	1.54491	8.41159e-16	0
ENSG00000049759	NEDD4L	protein_coding	Q96PU5	-0.0124759	0.949985	-0.129672	0.471559	0
ENSG00000049768	FOXP3	protein_coding	Q9BZS1	1.18972	0.0020349	2.30897	2.34663e-08	0
ENSG00000049769	PPP1R3F	protein_coding	Q6ZSY5	1.08808	3.92398e-07	0.899162	1.35503e-05	0
ENSG00000049860	HEXB	protein_coding	P07686	-0.434154	2.33098e-05	-0.661794	1.24574e-08	0
ENSG00000049883	PTCD2	protein_coding	Q8WV60	-0.0873946	0.565167	0.188796	0.251982	1
ENSG00000050030	KIAA2022	protein_coding	#N/A	-0.507209	0.153846	-0.32252	0.292589	0
ENSG00000050130	JKAMP	protein_coding	Q9P055	-0.407904	0.000182475	-0.403005	0.00190445	0
ENSG00000050165	DKK3	protein_coding	Q9UBP4	-0.0417348	0.948554	0.0294601	0.957063	0
ENSG00000050327	ARHGEF5	protein_coding	Q12774	NA	NA	NA	NA	0
ENSG00000050344	NFE2L3	protein_coding	Q9Y4A8	-0.9996	1.73344e-08	-0.0542852	0.826677	0
ENSG00000050393	MCUR1	protein_coding	Q96AQ8	-0.105964	0.435514	0.0190923	0.921212	1
ENSG00000050405	LIMA1	protein_coding	Q9UHB6	0.10173	0.420511	-0.0133522	0.948582	0
ENSG00000050426	LETMD1	protein_coding	Q6P1Q0	-0.178864	0.0567774	-0.401016	6.05885e-05	1
ENSG00000050438	SLC4A8	protein_coding	Q2Y0W8	0.126238	0.812696	0.519923	0.162413	0
ENSG00000050555	LAMC3	protein_coding	Q9Y6N6	0.792575	0.000149398	0.797296	5.46685e-05	0
ENSG00000050628	PTGER3	protein_coding	P43115	1.73093	0.311561	2.5825	0.108837	0
ENSG00000050730	TNIP3	protein_coding	Q96KP6	2.59014	NA	-1.28267	0.340799	0
ENSG00000050748	MAPK9	protein_coding	P45984	-0.403331	4.83636e-05	0.0892089	0.359786	0
ENSG00000050767	COL23A1	protein_coding	Q86Y22	1.26546	0.00779413	0.900432	0.0261269	0
ENSG00000050820	BCAR1	protein_coding	P56945	0.792768	1.80508e-18	0.431083	2.05168e-07	0
ENSG00000051009	FAM160A2	protein_coding	Q8N612	0.575537	1.02063e-07	0.648577	2.95474e-08	0
ENSG00000051108	HERPUD1	protein_coding	Q15011	0.208346	0.122246	-0.290816	0.0140634	0
ENSG00000051128	HOMER3	protein_coding	Q9NSC5	0.466211	0.277996	0.0239323	0.950535	0
ENSG00000051180	RAD51	protein_coding	Q06609	-0.31609	0.0022547	-0.468572	1.39957e-06	0
ENSG00000051341	POLQ	protein_coding	O75417	0.252063	0.00984264	0.648394	1.00845e-10	0
ENSG00000051382	PIK3CB	protein_coding	P42338	-0.536433	3.80466e-05	-0.246738	0.112072	0
ENSG00000051523	CYBA	protein_coding	P13498	0.491738	0.00625494	-0.606188	3.95015e-08	0
ENSG00000051596	THOC3	protein_coding	Q96J01	-0.204261	0.640189	-0.280025	0.326008	0
ENSG00000051620	HEBP2	protein_coding	Q9Y5Z4	-0.127108	0.438134	-0.775613	3.05129e-17	0
ENSG00000051825	MPHOSPH9	protein_coding	Q99550	0.019605	0.911831	0.441416	0.000197944	0
ENSG00000052126	PLEKHA5	protein_coding	Q9HAU0	-0.39983	2.1804e-05	-0.348755	0.00122006	0
ENSG00000052344	PRSS8	protein_coding	Q16651	0.242825	0.773019	0.726874	0.289366	0
ENSG00000052723	SIKE1	protein_coding	Q9BRV8	-0.634988	4.37334e-05	-1.10632	2.0421e-11	0
ENSG00000052749	RRP12	protein_coding	Q5JTH9	0.550936	1.3778e-20	0.77109	6.30783e-07	0
ENSG00000052795	FNIP2	protein_coding	Q9P278	-0.242283	0.14596	0.308895	0.135169	0
ENSG00000052802	MSMO1	protein_coding	Q15800	-1.39104	7.01564e-22	-1.13826	1.4058e-18	0
ENSG00000052841	TTC17	protein_coding	Q96AE7	0.0654829	0.677647	0.357724	0.00386914	0
ENSG00000052850	ALX4	protein_coding	Q9H161	0.102948	0.624964	0.540688	0.00176552	0
ENSG00000053108	FSTL4	protein_coding	Q6MZW2	0.123543	0.899828	-0.427185	0.50133	0
ENSG00000053254	FOXN3	protein_coding	O00409	0.112025	0.543221	0.868906	2.26442e-07	0
ENSG00000053328	METTL24	protein_coding	Q5JXM2	0.114806	0.902961	-0.0666425	0.925056	0
ENSG00000053371	AKR7A2	protein_coding	O43488	-0.123357	0.355263	-0.608143	2.12735e-08	1
ENSG00000053372	MRTO4	protein_coding	Q9UKD2	0.00868331	0.958504	-0.391345	4.24713e-06	0
ENSG00000053438	NNAT	protein_coding	Q16517	0.909727	0.0162502	1.64347	3.3091e-05	0
ENSG00000053501	USE1	protein_coding	Q9NZ43	0.251986	0.064689	-0.367595	0.0075968	0
ENSG00000053524	MCF2L2	protein_coding	Q86YR7	0.746391	0.0382061	0.937013	0.00523439	0
ENSG00000053702	NRIP2	protein_coding	Q9BQI9	0.270058	0.727025	0.982134	0.115174	0
ENSG00000053747	LAMA3	protein_coding	Q16787	0.353186	0.0014846	0.98653	2.79644e-27	0
ENSG00000053770	AP5M1	protein_coding	Q9H0R1	-0.914571	2.21289e-17	-0.373699	0.00375587	0
ENSG00000053900	ANAPC4	protein_coding	Q9UJX5	-1.03388	4.85013e-14	-0.479195	0.000232466	0
ENSG00000053918	KCNQ1	protein_coding	P51787	1.20676	0.054931	0.923377	0.0782461	0
ENSG00000054116	TRAPPC3	protein_coding	O43617	-0.740003	1.34711e-17	-0.795837	6.98015e-21	0
ENSG00000054118	THRAP3	protein_coding	Q9Y2W1	0.0122946	0.90406	-0.00729515	0.967608	0
ENSG00000054148	PHPT1	protein_coding	Q9NRX4	-0.557389	0.0104959	-0.88238	1.17593e-05	0
ENSG00000054179	ENTPD2	protein_coding	Q9Y5L3	0.704021	0.43189	1.15081	0.124271	0
ENSG00000054219	LY75	protein_coding	O60449	NA	NA	NA	NA	0
ENSG00000054267	ARID4B	protein_coding	Q4LE39	-0.0226287	0.824464	0.193305	0.0107982	0
ENSG00000054277	OPN3	protein_coding	Q9H1Y3	-0.248221	0.822293	-0.134485	0.88424	0
ENSG00000054282	SDCCAG8	protein_coding	Q86SQ7	-1.46452	0.142556	-0.63849	0.626467	0
ENSG00000054356	PTPRN	protein_coding	Q16849	1.44996	NA	1.00487	NA	0
ENSG00000054392	HHAT	protein_coding	Q5VTY9	NA	NA	0.357635	NA	0
ENSG00000054523	KIF1B	protein_coding	O60333	0.0274689	0.816078	0.0908386	0.444384	1
ENSG00000054598	FOXC1	protein_coding	Q12948	0.0839058	0.647804	-0.15578	0.221216	0
ENSG00000054611	TBC1D22A	protein_coding	Q8WUA7	0.316399	0.0983986	0.343491	0.0231443	0
ENSG00000054654	SYNE2	protein_coding	Q8WXH0	0.0459417	0.783882	0.755869	4.51088e-07	0
ENSG00000054690	PLEKHH1	protein_coding	Q9ULM0	0.880951	8.60767e-15	1.27683	6.5779e-20	0
ENSG00000054793	ATP9A	protein_coding	O75110	0.52762	1.35109e-05	1.05245	2.37082e-20	0
ENSG00000054796	SPO11	protein_coding	Q9Y5K1	NA	NA	NA	NA	0
ENSG00000054803	CBLN4	protein_coding	Q9NTU7	NA	NA	NA	NA	0
ENSG00000054938	CHRDL2	protein_coding	Q6WN34	-0.0152515	0.991125	0.62814	0.58992	0
ENSG00000054965	FAM168A	protein_coding	Q92567	-0.10528	0.437884	0.356078	0.00935303	0
ENSG00000054967	RELT	protein_coding	Q969Z4	1.13114	9.53981e-16	1.21253	1.83166e-16	0
ENSG00000054983	GALC	protein_coding	P54803	-0.206938	0.490519	-0.625045	0.00137953	0
ENSG00000055044	NOP58	protein_coding	Q9Y2X3	-0.565142	8.70573e-12	-0.471582	2.84103e-06	0
ENSG00000055070	SZRD1	protein_coding	#N/A	-0.0663636	0.698728	0.339665	0.0317356	0
ENSG00000055118	KCNH2	protein_coding	Q12809	0.998756	5.83901e-05	0.960433	2.05251e-05	0
ENSG00000055130	CUL1	protein_coding	Q13616	-0.814615	2.32052e-32	-0.69388	2.65716e-16	0
ENSG00000055147	FAM114A2	protein_coding	Q9NRY5	-0.471274	3.75875e-05	-0.807137	5.21665e-14	0
ENSG00000055163	CYFIP2	protein_coding	Q96F07	0.00527854	0.975847	0.2033	0.224317	0
ENSG00000055208	TAB2	protein_coding	Q9NYJ8	-0.234693	0.00695756	-0.0217024	0.844128	0
ENSG00000055211	GINM1	protein_coding	Q9NU53	-0.980112	2.91664e-26	-0.836999	2.92728e-14	0
ENSG00000055332	EIF2AK2	protein_coding	P19525	-0.918178	2.39539e-36	-0.639679	1.37099e-06	0
ENSG00000055483	USP36	protein_coding	Q9P275	0.619341	7.40249e-11	1.0507	8.64584e-40	0
ENSG00000055609	KMT2C	protein_coding	Q8NEZ4	0.318542	0.00017995	0.882609	8.0459e-25	0
ENSG00000055732	MCOLN3	protein_coding	Q8TDD5	-0.172541	0.285387	0.340396	0.0263304	0
ENSG00000055813	CCDC85A	protein_coding	#N/A	0.348713	NA	0.391134	NA	0
ENSG00000055917	PUM2	protein_coding	Q8TB72	-0.615802	7.95875e-11	-0.439176	1.30413e-05	0
ENSG00000055950	MRPL43	protein_coding	Q8N983	-0.0902892	0.461852	-0.555735	1.63795e-05	1
ENSG00000055955	ITIH4	protein_coding	Q14624	0.612653	0.581026	1.83569	0.0722724	0
ENSG00000055957	ITIH1	protein_coding	P19827	1.30425	0.01449	1.98317	0.00106455	0
ENSG00000056050	HPF1	protein_coding	Q9NWY4	-0.660286	5.05046e-08	-0.655014	9.34477e-08	0
ENSG00000056097	ZFR	protein_coding	Q96KR1	-0.330736	0.000270144	-0.229071	0.0480759	0
ENSG00000056277	ZNF280C	protein_coding	Q8ND82	-0.589532	1.42365e-16	-0.567547	1.99799e-08	0
ENSG00000056291	NPFFR2	protein_coding	Q9Y5X5	-0.383621	0.697719	0.39627	0.726575	0
ENSG00000056487	PHF21B	protein_coding	Q96EK2	1.47257	1.29344e-10	1.86108	1.04047e-17	0
ENSG00000056558	TRAF1	protein_coding	Q13077	1.29985	5.26273e-07	1.17658	7.07093e-06	0
ENSG00000056586	RC3H2	protein_coding	Q9HBD1	-0.0042173	0.979637	0.411183	0.00134512	0
ENSG00000056736	IL17RB	protein_coding	Q9NRM6	0.322834	0.0177977	0.247606	0.117161	0
ENSG00000056972	TRAF3IP2	protein_coding	O43734	-0.060901	0.809064	0.0929846	0.663895	0
ENSG00000056998	GYG2	protein_coding	O15488	-0.0592524	0.816078	-0.199595	0.295243	0
ENSG00000057019	DCBLD2	protein_coding	Q96PD2	-0.320275	0.00271203	0.0743991	0.540177	0
ENSG00000057149	SERPINB3	protein_coding	P29508	NA	NA	NA	NA	0
ENSG00000057252	SOAT1	protein_coding	P35610	-0.723154	5.68902e-15	-0.756199	4.12276e-17	0
ENSG00000057294	PKP2	protein_coding	Q99959	-0.271059	0.0925493	-0.140104	0.507123	0
ENSG00000057468	MSH4	protein_coding	O15457	0.222801	0.595555	1.09246	0.0012555	0
ENSG00000057593	F7	protein_coding	P08709	0.422265	NA	-0.183871	NA	0
ENSG00000057608	GDI2	protein_coding	P50395	-0.623415	8.93301e-14	-0.477798	0.000275573	0
ENSG00000057657	PRDM1	protein_coding	O75626	-0.204922	0.87732	0.214681	0.838965	0
ENSG00000057663	ATG5	protein_coding	Q9H1Y0	-0.541377	2.60537e-08	-0.384805	0.00364399	0
ENSG00000057704	TMCC3	protein_coding	Q9ULS5	-0.0382892	0.912281	-0.295153	0.194022	0
ENSG00000057757	PITHD1	protein_coding	Q9GZP4	-0.685116	9.55757e-09	-0.477813	4.64375e-05	0
ENSG00000057935	MTA3	protein_coding	Q9BTC8	-0.643111	4.5922e-09	-0.573065	6.93428e-05	0
ENSG00000058056	USP13	protein_coding	Q92995	-0.554622	0.000446394	-0.214862	0.279314	0
ENSG00000058063	ATP11B	protein_coding	Q9Y2G3	-0.649986	9.42698e-08	0.291543	0.0256601	0
ENSG00000058085	LAMC2	protein_coding	Q13753	0.248638	0.634535	-0.211062	0.603234	0
ENSG00000058091	CDK14	protein_coding	O94921	-0.749118	1.89632e-05	-0.14525	0.495664	0
ENSG00000058262	SEC61A1	protein_coding	P61619	0.15531	0.059945	-0.0539671	0.447334	0
ENSG00000058272	PPP1R12A	protein_coding	O14974	-0.205632	0.00119639	-0.207818	0.117396	0
ENSG00000058335	RASGRF1	protein_coding	Q13972	1.6743	0.102438	0.913111	0.279566	0
ENSG00000058404	CAMK2B	protein_coding	Q13554	0.734187	0.00163645	1.02982	5.12269e-07	0
ENSG00000058453	CROCC	protein_coding	Q5TZA2	0.900102	6.62696e-07	1.04766	2.12966e-07	0
ENSG00000058600	POLR3E	protein_coding	Q9NVU0	0.51515	8.58848e-07	0.544831	1.70291e-08	0
ENSG00000058668	ATP2B4	protein_coding	P23634	0.0144146	0.912048	0.111391	0.321655	0
ENSG00000058673	ZC3H11A	protein_coding	O75152	-0.614974	1.05496e-05	-0.252914	0.0362569	0
ENSG00000058729	RIOK2	protein_coding	Q9BVS4	-1.0251	5.88045e-20	-0.907148	1.46286e-14	0
ENSG00000058799	YIPF1	protein_coding	Q9Y548	-0.276984	0.105773	-0.33944	0.0231903	0
ENSG00000058804	NDC1	protein_coding	Q9BTX1	-0.664859	5.7443e-08	-0.27541	0.025541	0
ENSG00000058866	DGKG	protein_coding	P49619	1.18948	0.472447	0.454973	0.724055	0
ENSG00000059122	FLYWCH1	protein_coding	Q4VC44	1.0216	1.02866e-26	0.795085	1.59743e-15	0
ENSG00000059145	UNKL	protein_coding	Q9H9P5	1.0926	2.48989e-27	1.12689	1.29997e-23	0
ENSG00000059377	TBXAS1	protein_coding	P24557	0.247809	0.598723	0.128283	0.772045	0
ENSG00000059378	PARP12	protein_coding	Q9H0J9	0.319351	0.746249	1.88612	0.0298583	0
ENSG00000059573	ALDH18A1	protein_coding	P54886	-0.186917	0.14402	-0.167875	0.312878	1
ENSG00000059588	TARBP1	protein_coding	Q13395	-0.0472775	0.710472	0.451572	2.56078e-05	0
ENSG00000059691	GATB	protein_coding	O75879	-0.253392	0.0537413	-0.315152	0.00175888	1
ENSG00000059728	MXD1	protein_coding	Q05195	0.25828	0.135127	-0.0562146	0.844128	0
ENSG00000059758	CDK17	protein_coding	Q00537	-0.684102	8.11515e-08	-0.387396	0.0102359	0
ENSG00000059769	DNAJC25	protein_coding	Q9H1X3	1.35333	1.47475e-13	1.26426	9.08397e-11	0
ENSG00000059804	SLC2A3	protein_coding	P11169	0.0108348	0.979755	-0.372882	0.149511	0
ENSG00000059915	PSD	protein_coding	A5PKW4	1.15606	1.24411e-05	1.28295	1.27658e-07	0
ENSG00000060069	CTDP1	protein_coding	Q9Y5B0	0.874219	1.63126e-06	1.04731	2.00694e-09	0
ENSG00000060138	YBX3	protein_coding	P16989	0.0111918	0.930009	-0.206333	0.206394	0
ENSG00000060140	STYK1	protein_coding	Q6J9G0	-0.498709	0.429039	-0.107275	0.86687	0
ENSG00000060237	WNK1	protein_coding	Q9H4A3	-0.182093	0.0810121	0.00127717	0.993257	0
ENSG00000060303	RPS17P5	processed_pseudogene	#N/A	-1.05859	0.212094	-0.862896	0.286697	0
ENSG00000060339	CCAR1	protein_coding	Q8IX12	-0.186033	0.0203892	0.0016006	0.991766	0
ENSG00000060491	OGFR	protein_coding	Q9NZT2	0.47901	0.00238926	0.348838	0.0247884	0
ENSG00000060558	GNA15	protein_coding	P30679	2.83396	NA	2.2362	0.181844	0
ENSG00000060566	CREB3L3	protein_coding	Q68CJ9	-0.170929	NA	-1.07203	NA	0
ENSG00000060642	PIGV	protein_coding	Q9NUD9	-0.198993	0.293131	0.0516186	0.843207	0
ENSG00000060656	PTPRU	protein_coding	Q92729	1.06069	3.00015e-32	1.12257	2.84203e-26	0
ENSG00000060688	SNRNP40	protein_coding	Q96DI7	-0.671042	2.89122e-08	-0.846472	2.10746e-15	0
ENSG00000060709	RIMBP2	protein_coding	O15034	-1.60356	NA	0.627545	NA	0
ENSG00000060718	COL11A1	protein_coding	P12107	-0.152839	NA	0.760173	NA	0
ENSG00000060749	QSER1	protein_coding	#N/A	-0.823551	2.18801e-28	-0.300078	0.00714495	0
ENSG00000060762	MPC1	protein_coding	Q9Y5U8	-0.893296	8.45374e-20	-0.929032	8.19818e-20	1
ENSG00000060971	ACAA1	protein_coding	P09110	0.951974	4.33935e-10	0.200861	0.297593	1
ENSG00000060982	BCAT1	protein_coding	P54687	-0.641629	1.80099e-09	-0.784308	3.13464e-09	0
ENSG00000061273	HDAC7	protein_coding	Q8WUI4	1.24129	1.4909e-24	1.30718	1.42573e-27	0
ENSG00000061337	LZTS1	protein_coding	Q9Y250	-0.0304034	0.965808	0.446781	0.375381	0
ENSG00000061455	PRDM6	protein_coding	Q9NQX0	0.101824	0.656469	0.448096	0.01254	0
ENSG00000061492	WNT8A	protein_coding	Q9H1J5	0.783028	NA	0.97614	NA	0
ENSG00000061656	SPAG4	protein_coding	Q9NPE6	0.417018	0.177294	0.550633	0.0656892	0
ENSG00000061676	NCKAP1	protein_coding	Q9Y2A7	-0.130095	0.356677	-0.187175	0.181151	0
ENSG00000061794	MRPS35	protein_coding	P82673	-0.82671	1.35403e-11	-0.955299	7.08342e-16	1
ENSG00000061918	GUCY1B3	protein_coding	#N/A	-0.338644	0.0363559	-0.56791	3.64555e-06	0
ENSG00000061936	SFSWAP	protein_coding	Q12872	0.287756	0.000685084	0.280985	0.000363461	0
ENSG00000061938	TNK2	protein_coding	Q07912	1.64581	5.53566e-76	1.51734	2.18316e-30	0
ENSG00000061987	MON2	protein_coding	Q7Z3U7	-0.357126	0.0170474	0.0565498	0.779653	0
ENSG00000062038	CDH3	protein_coding	P22223	0.049717	0.950505	0.0239846	0.973974	0
ENSG00000062096	ARSF	protein_coding	P54793	0.999335	NA	1.51178	NA	0
ENSG00000062194	GPBP1	protein_coding	Q86WP2	0.181626	0.188667	0.113603	0.475564	0
ENSG00000062282	DGAT2	protein_coding	Q96PD7	0.677861	0.0401266	0.177258	0.632484	0
ENSG00000062370	ZNF112	protein_coding	Q9UJU3	-1.025	0.00228342	-0.381554	0.350779	0
ENSG00000062485	CS	protein_coding	O75390	-0.430999	6.55187e-06	-0.459458	6.18439e-05	1
ENSG00000062524	LTK	protein_coding	P29376	0.914105	0.0027061	0.874767	0.00180066	0
ENSG00000062582	MRPS24	protein_coding	Q96EL2	0.182542	0.738516	-0.309536	0.408235	1
ENSG00000062598	ELMO2	protein_coding	Q96JJ3	0.0879447	0.43623	-0.282119	0.00116559	0
ENSG00000062650	WAPL	protein_coding	Q7Z5K2	-0.494132	1.71751e-19	-0.315	1.14413e-07	0
ENSG00000062716	VMP1	protein_coding	Q96GC9	-1.28677	7.38916e-29	-0.874174	1.92741e-24	0
ENSG00000062725	APPBP2	protein_coding	Q92624	-0.555452	5.52815e-15	-0.938213	4.06306e-22	0
ENSG00000062822	POLD1	protein_coding	P28340	0.781012	8.73633e-16	0.536431	1.44533e-05	0
ENSG00000063015	SEZ6	protein_coding	Q53EL9	0.26582	0.818459	1.40568	0.232989	0
ENSG00000063046	EIF4B	protein_coding	P23588	-0.307675	0.165101	-0.784323	0.000832923	0
ENSG00000063127	SLC6A16	protein_coding	Q9GZN6	0.971546	1.48274e-05	1.27938	2.04224e-07	0
ENSG00000063169	GLTSCR1	protein_coding	#N/A	0.783156	2.49592e-10	1.08353	1.48592e-20	0
ENSG00000063176	SPHK2	protein_coding	Q9NRA0	1.1664	4.2215e-21	1.29073	3.50069e-27	0
ENSG00000063177	RPL18	protein_coding	Q07020	0.518448	0.000709899	-0.514338	4.47921e-12	0
ENSG00000063180	CA11	protein_coding	O75493	0.621011	0.000505963	0.284224	0.0848009	0
ENSG00000063241	ISOC2	protein_coding	Q96AB3	0.298721	0.0794121	-0.0141255	0.928602	1
ENSG00000063244	U2AF2	protein_coding	P26368	0.0899293	0.613102	-0.434838	0.00343253	0
ENSG00000063245	EPN1	protein_coding	Q9Y6I3	0.875678	1.33482e-19	0.943277	5.40655e-20	0
ENSG00000063322	MED29	protein_coding	Q9NX70	-0.349798	0.00723103	-0.489186	4.1102e-06	0
ENSG00000063438	AHRR	protein_coding	A9YTQ3	0.586261	7.11275e-08	0.686073	1.86272e-08	0
ENSG00000063515	GSC2	protein_coding	O15499	-0.427544	0.832825	2.92542	NA	0
ENSG00000063587	ZNF275	protein_coding	Q9NSD4	0.158726	0.25367	0.749798	2.2184e-08	0
ENSG00000063601	MTMR1	protein_coding	Q13613	0.00935556	0.96794	-0.372718	0.00873255	0
ENSG00000063660	GPC1	protein_coding	P35052	0.548638	6.65893e-07	0.373175	0.0200376	0
ENSG00000063761	ADCK1	protein_coding	Q86TW2	0.401629	0.00714301	0.346179	0.0110146	1
ENSG00000063854	HAGH	protein_coding	Q16775	0.962804	4.1768e-13	0.2033	0.157628	1
ENSG00000063978	RNF4	protein_coding	P78317	0.0436989	0.730921	-0.0352037	0.823033	0
ENSG00000064012	CASP8	protein_coding	Q14790	-0.549712	2.24461e-07	-0.870604	1.27893e-09	1
ENSG00000064042	LIMCH1	protein_coding	Q9UPQ0	0.267481	0.333735	0.589832	0.0341447	0
ENSG00000064102	ASUN	protein_coding	#N/A	-0.37873	3.05414e-10	-0.0568111	0.639201	0
ENSG00000064115	TM7SF3	protein_coding	Q9NS93	-0.152732	0.237707	-0.0669858	0.63849	0
ENSG00000064195	DLX3	protein_coding	O60479	0.221455	0.807879	-0.191743	0.816494	0
ENSG00000064199	SPA17	protein_coding	Q15506	-1.12434	5.22736e-09	-0.904756	2.14445e-05	0
ENSG00000064201	TSPAN32	protein_coding	Q96QS1	0.573793	NA	0.973389	NA	0
ENSG00000064205	WISP2	protein_coding	O76076	1.09129	0.507265	1.13375	0.359924	0
ENSG00000064218	DMRT3	protein_coding	Q9NQL9	-0.738608	0.19492	-0.424	0.457118	0
ENSG00000064225	ST3GAL6	protein_coding	Q9Y274	0.0622961	0.815265	-0.0693256	0.756811	0
ENSG00000064270	ATP2C2	protein_coding	O75185	1.26102	0.114936	1.68082	0.0543846	0
ENSG00000064300	NGFR	protein_coding	P08138	1.20134	0.0352811	0.624464	0.283675	0
ENSG00000064309	CDON	protein_coding	Q4KMG0	0.0364419	0.803352	0.243438	0.0278981	0
ENSG00000064313	TAF2	protein_coding	Q6P1X5	-0.416192	1.5739e-09	-0.0919655	0.449703	0
ENSG00000064393	HIPK2	protein_coding	Q9H2X6	0.395086	2.09384e-05	1.10916	3.31776e-27	0
ENSG00000064419	TNPO3	protein_coding	Q9Y5L0	-0.216208	0.0107695	-0.0146212	0.895365	0
ENSG00000064489	BORCS8-MEF2B	protein_coding	H3BNR1	NA	NA	NA	NA	0
ENSG00000064490	RFXANK	protein_coding	O14593	0.435271	0.00492541	-0.195223	0.14041	0
ENSG00000064545	TMEM161A	protein_coding	Q9NX61	1.00483	1.7303e-52	0.496005	1.79936e-13	0
ENSG00000064547	LPAR2	protein_coding	Q9HBW0	0.888256	0.00617541	1.11508	0.000175145	0
ENSG00000064601	CTSA	protein_coding	P10619	0.186997	0.136898	-0.157129	0.32457	0
ENSG00000064607	SUGP2	protein_coding	Q8IX01	0.390631	2.50748e-09	0.609914	2.7744e-19	0
ENSG00000064651	SLC12A2	protein_coding	P55011	-0.615361	1.57789e-15	-0.30999	0.0310249	0
ENSG00000064652	SNX24	protein_coding	Q9Y343	-0.506323	0.0745582	-0.104865	0.729152	0
ENSG00000064655	EYA2	protein_coding	O00167	-0.00791341	0.980836	0.189329	0.438339	0
ENSG00000064666	CNN2	protein_coding	Q99439	-0.267643	0.0415283	-0.633567	4.50449e-09	0
ENSG00000064687	ABCA7	protein_coding	Q8IZY2	1.23926	2.78257e-25	1.1011	2.26006e-27	0
ENSG00000064692	SNCAIP	protein_coding	Q9Y6H5	0.840907	0.0359248	1.00723	0.0037182	0
ENSG00000064703	DDX20	protein_coding	Q9UHI6	-0.864325	2.15523e-14	-0.711595	1.38298e-08	0
ENSG00000064726	BTBD1	protein_coding	Q9H0C5	0.150191	0.0533742	0.0415001	0.644976	0
ENSG00000064763	FAR2	protein_coding	Q96K12	-0.387973	0.00721348	-0.443495	0.000944206	0
ENSG00000064787	BCAS1	protein_coding	O75363	-0.13161	0.942924	-0.772786	0.501583	0
ENSG00000064835	POU1F1	protein_coding	P28069	-1.73136	NA	NA	NA	0
ENSG00000064886	CHI3L2	protein_coding	Q15782	-2.23129	NA	0.934713	NA	0
ENSG00000064932	SBNO2	protein_coding	Q9Y2G9	0.506068	0.504143	0.664545	0.335564	0
ENSG00000064933	PMS1	protein_coding	P54277	-0.586352	6.19849e-09	-0.21741	0.216383	0
ENSG00000064961	HMG20B	protein_coding	Q9P0W2	0.452247	0.008124	0.533931	6.93428e-05	0
ENSG00000064989	CALCRL	protein_coding	Q16602	-0.846123	0.109662	-0.815421	0.115984	0
ENSG00000064995	TAF11	protein_coding	Q15544	-0.135191	0.308646	-0.242452	0.0999591	0
ENSG00000064999	ANKS1A	protein_coding	Q92625	0.362762	0.00365834	0.315613	0.000168291	0
ENSG00000065000	AP3D1	protein_coding	O14617	0.70239	5.25961e-38	1.02168	3.6439e-55	0
ENSG00000065029	ZNF76	protein_coding	P36508	0.956713	3.30559e-09	1.29679	7.79771e-22	0
ENSG00000065054	SLC9A3R2	protein_coding	Q15599	0.162636	0.297603	0.543061	1.80899e-06	0
ENSG00000065057	NTHL1	protein_coding	P78549	-0.108898	0.578311	-0.585737	1.54347e-08	1
ENSG00000065060	UHRF1BP1	protein_coding	Q6BDS2	0.150487	0.159282	0.657671	1.49943e-10	0
ENSG00000065135	GNAI3	protein_coding	P08754	-0.805045	4.49061e-22	-0.619134	1.09641e-09	0
ENSG00000065150	IPO5	protein_coding	O00410	-0.270788	0.0380191	-0.514227	0.00031677	0
ENSG00000065154	OAT	protein_coding	P04181	-0.282684	0.000263033	-0.795217	8.28152e-24	1
ENSG00000065183	WDR3	protein_coding	Q9UNX4	-0.603528	2.22144e-08	-0.594805	0.0043435	0
ENSG00000065243	PKN2	protein_coding	Q16513	-0.639734	4.99393e-12	-0.34099	0.00757459	0
ENSG00000065268	WDR18	protein_coding	Q9BV38	-0.141167	0.272727	-0.276156	0.026155	0
ENSG00000065308	TRAM2	protein_coding	Q15035	1.00187	8.99901e-18	0.464173	0.000492546	0
ENSG00000065320	NTN1	protein_coding	O95631	0.467651	0.000248129	0.637047	2.59722e-07	0
ENSG00000065325	GLP2R	protein_coding	O95838	2.10975	NA	2.03364	NA	0
ENSG00000065328	MCM10	protein_coding	Q7L590	0.0111264	0.914437	-0.329011	0.00147782	0
ENSG00000065357	DGKA	protein_coding	P23743	-0.146574	0.38326	-0.256288	0.263028	0
ENSG00000065361	ERBB3	protein_coding	P21860	-0.0471018	0.838425	0.46075	0.0036456	0
ENSG00000065371	ROPN1	protein_coding	Q9HAT0	-0.0243107	NA	0.934713	NA	0
ENSG00000065413	ANKRD44	protein_coding	Q8N8A2	0.494843	0.484876	0.447054	0.509011	0
ENSG00000065427	KARS	protein_coding	Q15046	-0.429089	3.14528e-05	-0.726801	1.25795e-14	1
ENSG00000065457	ADAT1	protein_coding	Q9BUB4	-0.0864889	0.57731	0.443561	0.000338276	0
ENSG00000065485	PDIA5	protein_coding	Q14554	-0.11422	0.366981	-0.52471	0.000122777	0
ENSG00000065491	TBC1D22B	protein_coding	Q9NU19	0.169809	0.248711	0.589145	0.000166055	0
ENSG00000065518	NDUFB4	protein_coding	O95168	0.0319841	0.912633	-0.92171	7.05641e-23	1
ENSG00000065526	SPEN	protein_coding	Q96T58	0.835936	1.02296e-10	0.952548	5.97889e-06	0
ENSG00000065534	MYLK	protein_coding	Q15746	0.344394	0.0788793	0.337774	0.0581507	0
ENSG00000065548	ZC3H15	protein_coding	Q8WU90	-0.808521	1.04081e-40	-0.793993	1.95203e-23	0
ENSG00000065559	MAP2K4	protein_coding	P45985	-0.785226	1.45788e-14	-0.498558	3.65837e-07	0
ENSG00000065600	TMEM206	protein_coding	Q9H813	0.202715	0.104573	-0.0589894	0.622981	0
ENSG00000065609	SNAP91	protein_coding	O60641	0.0106534	0.976259	0.272207	0.221158	0
ENSG00000065613	SLK	protein_coding	Q9H2G2	-0.370448	3.0714e-05	-0.266951	0.0275314	0
ENSG00000065615	CYB5R4	protein_coding	Q7L1T6	-1.09894	1.21775e-09	-0.865522	2.85894e-05	0
ENSG00000065618	COL17A1	protein_coding	Q9UMD9	1.8629	0.204315	0.474168	0.67362	0
ENSG00000065621	GSTO2	protein_coding	Q9H4Y5	0.176252	0.645071	-0.23298	0.432531	0
ENSG00000065665	SEC61A2	protein_coding	Q9H9S3	-0.571752	4.39714e-07	-0.494561	1.00141e-07	0
ENSG00000065675	PRKCQ	protein_coding	Q04759	-0.510878	0.0171229	-1.02472	2.92652e-11	0
ENSG00000065717	TLE2	protein_coding	Q04725	1.24035	1.47741e-12	1.06458	1.28177e-10	0
ENSG00000065802	ASB1	protein_coding	Q9Y576	0.742863	7.15804e-13	0.904264	9.43583e-14	0
ENSG00000065809	FAM107B	protein_coding	#N/A	-0.413662	0.000973332	-0.173626	0.237501	0
ENSG00000065833	ME1	protein_coding	P48163	-0.125115	0.428715	-0.449839	0.000250875	1
ENSG00000065882	TBC1D1	protein_coding	Q86TI0	0.507073	0.000155232	0.48377	0.00014673	0
ENSG00000065883	CDK13	protein_coding	Q14004	-0.199536	0.133851	0.363771	0.00157967	0
ENSG00000065911	MTHFD2	protein_coding	P13995	-0.642923	1.82333e-09	-1.12425	6.63547e-26	1
ENSG00000065923	SLC9A7	protein_coding	Q96T83	-0.310873	0.0155931	-0.287333	0.0706695	0
ENSG00000065970	FOXJ2	protein_coding	Q9P0K8	0.203081	0.140911	-0.208677	0.227972	0
ENSG00000065978	YBX1	protein_coding	P67809	0.0343539	0.850437	-0.253095	0.0136531	0
ENSG00000065989	PDE4A	protein_coding	P27815	0.951154	4.97558e-08	1.39024	5.35999e-12	0
ENSG00000066027	PPP2R5A	protein_coding	Q15172	0.261226	0.113357	-0.399974	0.0138626	0
ENSG00000066032	CTNNA2	protein_coding	P26232	1.53934	NA	1.04342	NA	0
ENSG00000066044	ELAVL1	protein_coding	Q15717	-0.283465	0.0266216	-0.596994	2.74682e-10	0
ENSG00000066056	TIE1	protein_coding	P35590	-0.294281	NA	2.2949	NA	0
ENSG00000066084	DIP2B	protein_coding	Q9P265	-0.254442	0.00203057	-0.39989	0.00103002	0
ENSG00000066117	SMARCD1	protein_coding	Q96GM5	0.16373	0.104319	-0.326681	5.05142e-05	0
ENSG00000066135	KDM4A	protein_coding	O75164	-0.0940051	0.460741	0.0804817	0.470025	0
ENSG00000066136	NFYC	protein_coding	Q13952	-0.538779	5.10136e-06	-0.570668	5.20644e-06	0
ENSG00000066185	ZMYND12	protein_coding	Q9H0C1	0.69923	0.360725	0.550936	0.413603	0
ENSG00000066230	SLC9A3	protein_coding	P48764	1.37742	5.594e-06	0.907458	0.000396344	0
ENSG00000066248	NGEF	protein_coding	Q8N5V2	0.257498	0.168383	-0.00108465	0.996515	0
ENSG00000066279	ASPM	protein_coding	Q8IZT6	-0.684482	5.62309e-13	0.0627679	0.691945	0
ENSG00000066294	CD84	protein_coding	Q9UIB8	-0.690529	NA	NA	NA	0
ENSG00000066322	ELOVL1	protein_coding	Q9BW60	0.296826	0.0566649	-0.418073	4.45471e-06	0
ENSG00000066336	SPI1	protein_coding	P17947	1.38192	0.175667	1.74775	0.0644783	0
ENSG00000066379	ZNRD1	protein_coding	Q9P1U0	1.04633	NA	-0.833588	NA	0
ENSG00000066382	MPPED2	protein_coding	Q15777	-0.0855866	0.849211	0.31808	0.411863	0
ENSG00000066405	CLDN18	protein_coding	P56856	0.20751	0.819929	0.55516	0.468506	0
ENSG00000066422	ZBTB11	protein_coding	O95625	-0.54619	4.72245e-10	-0.246014	0.118927	0
ENSG00000066427	ATXN3	protein_coding	P54252	-0.139419	0.196091	-0.157177	0.141732	0
ENSG00000066455	GOLGA5	protein_coding	Q8TBA6	-0.505313	1.75669e-11	-0.706321	6.21502e-06	0
ENSG00000066468	FGFR2	protein_coding	P21802	-0.408848	0.000149272	0.192308	0.113717	0
ENSG00000066557	LRRC40	protein_coding	Q9H9A6	-0.629679	3.21638e-18	-0.557569	1.40608e-07	0
ENSG00000066583	ISOC1	protein_coding	Q96CN7	0.270481	0.130397	-0.350389	0.0370228	0
ENSG00000066629	EML1	protein_coding	O00423	-0.021663	0.896773	0.166448	0.180591	0
ENSG00000066651	TRMT11	protein_coding	Q7Z4G4	-0.957786	6.39326e-11	-0.550599	0.00480051	1
ENSG00000066654	THUMPD1	protein_coding	Q9NXG2	-0.342345	0.00248371	-0.444669	6.61918e-07	0
ENSG00000066697	MSANTD3	protein_coding	Q96H12	-0.988678	2.67715e-10	-0.386391	0.0402366	0
ENSG00000066735	KIF26A	protein_coding	Q9ULI4	0.73597	2.32214e-09	1.29953	2.26828e-15	0
ENSG00000066739	ATG2B	protein_coding	Q96BY7	-0.259174	0.000681252	0.212153	0.0254562	0
ENSG00000066777	ARFGEF1	protein_coding	Q9Y6D6	-0.614243	4.12588e-13	0.046299	0.703161	0
ENSG00000066813	ACSM2B	protein_coding	Q68CK6	NA	NA	0.357635	NA	0
ENSG00000066827	ZFAT	protein_coding	Q9P243	0.337611	0.0853744	0.230064	0.196708	0
ENSG00000066855	MTFR1	protein_coding	Q15390	-0.490574	5.76664e-06	-0.384985	0.00129387	1
ENSG00000066923	STAG3	protein_coding	Q9UJ98	0.274911	0.641188	0.984262	0.0234469	0
ENSG00000066926	FECH	protein_coding	P22830	0.0866074	0.52569	-0.351502	0.0131922	1
ENSG00000066933	MYO9A	protein_coding	B2RTY4	0.584108	7.47571e-14	0.893941	1.6183e-12	0
ENSG00000067048	DDX3Y	protein_coding	O15523	-0.795855	0.32282	-1.11602	0.0984243	0
ENSG00000067057	PFKP	protein_coding	Q01813	0.0485307	0.840436	0.0611753	0.750166	0
ENSG00000067064	IDI1	protein_coding	Q13907	-1.03549	3.85911e-14	-1.39097	2.1055e-28	1
ENSG00000067066	SP100	protein_coding	P23497	0.20232	NA	-0.869424	0.599023	0
ENSG00000067082	KLF6	protein_coding	Q99612	0.360406	0.0083061	0.108078	0.452253	0
ENSG00000067113	PLPP1	protein_coding	O14494	0.630792	4.02956e-05	-0.219863	0.122307	0
ENSG00000067141	NEO1	protein_coding	Q92859	-0.229293	0.00613628	-0.525789	1.68077e-07	0
ENSG00000067167	TRAM1	protein_coding	Q15629	-0.591781	1.14129e-06	-0.497925	8.25085e-10	0
ENSG00000067177	PHKA1	protein_coding	P46020	-0.423943	0.00018765	0.00690861	0.973188	0
ENSG00000067182	TNFRSF1A	protein_coding	P19438	-0.100996	0.460864	-0.0954646	0.411357	0
ENSG00000067191	CACNB1	protein_coding	Q02641	1.42176	2.97156e-10	1.6069	5.46299e-19	0
ENSG00000067208	EVI5	protein_coding	O60447	0.15644	0.287279	0.554405	3.90618e-06	0
ENSG00000067221	STOML1	protein_coding	Q9UBI4	0.709379	0.000150308	0.819667	5.64176e-06	1
ENSG00000067225	PKM	protein_coding	P14618	-0.123047	0.478368	-0.364588	0.000834832	0
ENSG00000067248	DHX29	protein_coding	Q7Z478	-0.696317	3.04469e-14	-0.263265	0.184586	0
ENSG00000067334	DNTTIP2	protein_coding	Q5QJE6	-0.37161	1.94923e-10	-1.08688	9.04824e-23	0
ENSG00000067365	METTL22	protein_coding	Q9BUU2	1.34673	5.68593e-22	1.3717	2.74698e-25	0
ENSG00000067369	TP53BP1	protein_coding	Q12888	-0.593683	8.90154e-16	-0.371411	0.00371472	0
ENSG00000067445	TRO	protein_coding	Q12816	-0.1454	0.242868	0.191435	0.284896	0
ENSG00000067533	RRP15	protein_coding	Q9Y3B9	-0.998958	7.27314e-26	-0.897564	2.72122e-16	0
ENSG00000067560	RHOA	protein_coding	P61586	0.0686612	0.620149	-0.660192	6.9611e-15	0
ENSG00000067596	DHX8	protein_coding	Q14562	-0.258572	0.0207895	-0.618062	0.00022004	0
ENSG00000067601	PMS2P4	transcribed_unprocessed_pseudogene	#N/A	0.432602	0.0664654	0.328555	0.170144	0
ENSG00000067606	PRKCZ	protein_coding	Q05513	1.37401	3.04619e-11	1.05687	9.83096e-07	0
ENSG00000067646	ZFY	protein_coding	P08048	-0.937558	0.563324	-3.02254	0.0105753	0
ENSG00000067704	IARS2	protein_coding	Q9NSE4	-0.8256	7.93513e-10	-0.631206	1.56869e-07	1
ENSG00000067715	SYT1	protein_coding	P21579	0.374314	0.00700735	-0.364858	0.00445741	0
ENSG00000067798	NAV3	protein_coding	Q8IVL0	1.74309	0.0340585	0.917263	0.15855	0
ENSG00000067829	IDH3G	protein_coding	P51553	-0.550364	1.5321e-06	-0.703874	2.54586e-10	1
ENSG00000067836	ROGDI	protein_coding	Q9GZN7	0.653835	0.000136382	0.444192	0.00361143	0
ENSG00000067840	PDZD4	protein_coding	Q76G19	1.17045	2.61266e-14	1.30132	1.62387e-16	0
ENSG00000067842	ATP2B3	protein_coding	Q16720	0.764027	0.149394	0.980069	0.0187236	0
ENSG00000067900	ROCK1	protein_coding	Q13464	-0.352386	1.46006e-08	0.0242665	0.778884	0
ENSG00000067955	CBFB	protein_coding	Q13951	-0.525014	1.97641e-06	-0.867974	1.71899e-14	0
ENSG00000067992	PDK3	protein_coding	Q15120	-0.573217	8.42431e-13	-0.453868	0.000951269	1
ENSG00000068001	HYAL2	protein_coding	Q12891	0.559099	0.000241491	0.697126	2.0539e-06	0
ENSG00000068024	HDAC4	protein_coding	P56524	0.747602	2.97517e-09	1.15041	3.54128e-17	0
ENSG00000068028	RASSF1	protein_coding	Q9NS23	0.57199	0.000128923	0.259366	0.0712756	0
ENSG00000068078	FGFR3	protein_coding	P22607	1.35273	3.26186e-26	1.34947	2.20227e-27	0
ENSG00000068079	IFI35	protein_coding	P80217	1.12405	0.000600668	0.341225	0.243806	0
ENSG00000068097	HEATR6	protein_coding	Q6AI08	0.326205	0.00140253	-0.384463	0.000367661	0
ENSG00000068120	COASY	protein_coding	Q13057	0.560277	1.36771e-07	0.341899	0.00202764	1
ENSG00000068137	PLEKHH3	protein_coding	Q7Z736	1.09872	2.04109e-21	0.903973	1.94129e-25	0
ENSG00000068305	MEF2A	protein_coding	Q02078	-0.927191	2.21219e-09	-0.893904	1.52236e-09	0
ENSG00000068308	OTUD5	protein_coding	Q96G74	0.316452	0.00101012	0.0868562	0.312843	0
ENSG00000068323	TFE3	protein_coding	P19532	1.04581	2.42012e-18	0.597547	6.27698e-07	0
ENSG00000068354	TBC1D25	protein_coding	Q3MII6	0.482081	3.41689e-05	0.182154	0.17932	0
ENSG00000068366	ACSL4	protein_coding	O60488	-1.22362	5.94557e-32	-0.889456	3.25398e-09	1
ENSG00000068383	INPP5A	protein_coding	Q14642	0.264314	0.112666	-0.272596	0.289766	0
ENSG00000068394	GPKOW	protein_coding	Q92917	-0.174612	0.168232	-0.410112	0.000104707	0
ENSG00000068400	GRIPAP1	protein_coding	Q4V328	0.413079	3.8385e-06	0.695923	1.87413e-19	0
ENSG00000068438	FTSJ1	protein_coding	Q9UET6	0.221135	0.0477432	0.0874639	0.485432	0
ENSG00000068489	PRR11	protein_coding	Q96HE9	-0.239042	0.0733673	-0.511162	8.97062e-07	0
ENSG00000068615	REEP1	protein_coding	Q9H902	-0.685966	9.32849e-07	-0.400039	0.0101186	0
ENSG00000068650	ATP11A	protein_coding	P98196	0.44793	0.000336713	1.13364	3.67817e-15	0
ENSG00000068654	POLR1A	protein_coding	O95602	0.191006	0.00763799	0.274507	0.0503592	0
ENSG00000068697	LAPTM4A	protein_coding	Q15012	-0.478392	1.20408e-05	-0.737026	6.60894e-10	0
ENSG00000068724	TTC7A	protein_coding	Q9ULT0	0.921271	1.16286e-09	1.20835	1.88878e-18	0
ENSG00000068745	IP6K2	protein_coding	Q9UHH9	-0.253651	2.74778e-06	-0.655403	3.3452e-25	0
ENSG00000068781	STON1-GTF2A1L	protein_coding	Q53S48	0.422265	NA	1.51178	NA	0
ENSG00000068784	SRBD1	protein_coding	Q8N5C6	-0.878069	3.27017e-20	-0.508036	0.020015	0
ENSG00000068796	KIF2A	protein_coding	O00139	-1.11854	1.1045e-30	-0.970913	2.37192e-16	0
ENSG00000068831	RASGRP2	protein_coding	Q7LDG7	0.648327	0.0822958	0.476141	0.181191	0
ENSG00000068878	PSME4	protein_coding	Q14997	-0.371871	7.32836e-08	0.0898121	0.319117	0
ENSG00000068885	IFT80	protein_coding	Q9P2H3	-0.211423	0.167539	0.37497	0.00177092	0
ENSG00000068903	SIRT2	protein_coding	Q8IXJ6	NA	NA	NA	NA	0
ENSG00000068912	ERLEC1	protein_coding	Q96DZ1	-0.472556	0.000637961	-0.0215786	0.902674	0
ENSG00000068971	PPP2R5B	protein_coding	Q15173	1.19082	3.21638e-18	1.17733	2.17966e-21	0
ENSG00000068976	PYGM	protein_coding	P11217	0.92	4.67733e-05	1.53817	5.28407e-06	0
ENSG00000068985	PAGE1	protein_coding	O75459	-0.0976932	NA	0.386574	NA	0
ENSG00000069011	PITX1	protein_coding	P78337	0.658427	9.11064e-11	0.97022	2.07854e-16	0
ENSG00000069018	TRPC7	protein_coding	Q9HCX4	2.09305	0.222956	1.05473	0.437155	0
ENSG00000069020	MAST4	protein_coding	O15021	0.0701475	0.771684	0.456399	0.00932707	0
ENSG00000069122	ADGRF5	protein_coding	Q8IZF2	-0.0864498	NA	-0.156014	0.947074	0
ENSG00000069188	SDK2	protein_coding	Q58EX2	0.270121	0.159521	0.361172	0.0601029	0
ENSG00000069206	ADAM7	protein_coding	Q9H2U9	NA	NA	NA	NA	0
ENSG00000069248	NUP133	protein_coding	Q8WUM0	-0.834147	1.10252e-27	-0.569437	0.000753895	0
ENSG00000069275	NUCKS1	protein_coding	Q9H1E3	-0.0991517	0.242619	-0.109336	0.437789	0
ENSG00000069329	VPS35	protein_coding	Q96QK1	-0.651387	1.74743e-11	-0.726992	3.18634e-10	0
ENSG00000069345	DNAJA2	protein_coding	O60884	-1.02767	1.96077e-38	-1.0307	1.0237e-22	0
ENSG00000069399	BCL3	protein_coding	P20749	0.650427	0.28686	1.24031	0.0174137	0
ENSG00000069424	KCNAB2	protein_coding	Q13303	0.198154	0.664054	0.557241	0.132324	0
ENSG00000069431	ABCC9	protein_coding	O60706	-0.57099	0.538983	-0.268903	0.76845	0
ENSG00000069482	GAL	protein_coding	P22466	-0.277158	0.0695348	-0.609376	1.14208e-12	0
ENSG00000069493	CLEC2D	protein_coding	Q9UHP7	-0.0706042	0.868271	1.10556	0.000814878	0
ENSG00000069509	FUNDC1	protein_coding	Q8IVP5	-0.565432	9.64175e-07	-0.575663	7.86101e-07	1
ENSG00000069535	MAOB	protein_coding	P27338	-0.253353	0.792567	-0.385524	0.607686	1
ENSG00000069667	RORA	protein_coding	P35398	0.189831	0.438758	0.304782	0.191536	0
ENSG00000069696	DRD4	protein_coding	P21917	NA	NA	NA	NA	0
ENSG00000069702	TGFBR3	protein_coding	Q03167	-0.286777	0.00988741	-0.0845723	0.474384	0
ENSG00000069712	KIAA1107	protein_coding	Q9UPP5	NA	NA	NA	NA	0
ENSG00000069764	PLA2G10	protein_coding	O15496	NA	NA	NA	NA	0
ENSG00000069812	HES2	protein_coding	Q9Y543	0.23597	0.844015	1.31991	0.220554	0
ENSG00000069849	ATP1B3	protein_coding	P54709	-0.557239	3.39503e-05	-0.808805	7.85595e-11	0
ENSG00000069869	NEDD4	protein_coding	P46934	-0.659824	1.34564e-06	-0.790628	1.65196e-09	0
ENSG00000069943	PIGB	protein_coding	Q92521	-0.0308623	0.926646	0.00783114	0.98108	0
ENSG00000069956	MAPK6	protein_coding	Q16659	1.26625	3.21638e-18	0.558824	0.00136841	0
ENSG00000069966	GNB5	protein_coding	O14775	0.0858929	0.728622	-0.489935	0.000276695	0
ENSG00000069974	RAB27A	protein_coding	P51159	-0.640329	0.0267796	-0.352476	0.234492	0
ENSG00000069998	CECR5	protein_coding	Q9BXW7	0.375054	0.000187966	-0.0124566	0.9152	1
ENSG00000070010	UFD1L	protein_coding	#N/A	0.0967395	0.543072	-0.310852	0.000451233	0
ENSG00000070018	LRP6	protein_coding	O75581	NA	NA	NA	NA	0
ENSG00000070019	GUCY2C	protein_coding	P25092	0.499997	0.61606	2.09338	0.0352422	0
ENSG00000070031	SCT	protein_coding	P09683	NA	NA	NA	NA	0
ENSG00000070047	PHRF1	protein_coding	Q9P1Y6	0.921187	0.327073	1.34789	0.236314	0
ENSG00000070061	IKBKAP	protein_coding	#N/A	-0.0226191	0.830994	0.213403	0.149222	0
ENSG00000070081	NUCB2	protein_coding	P80303	-0.737574	2.13626e-20	-0.766356	3.28737e-13	1
ENSG00000070087	PFN2	protein_coding	P35080	-0.71813	2.15539e-15	-0.943369	1.11222e-34	0
ENSG00000070159	PTPN3	protein_coding	P26045	0.664576	9.2546e-05	0.406494	0.0270296	0
ENSG00000070182	SPTB	protein_coding	P11277	0.370131	0.00283186	0.713087	1.63624e-08	0
ENSG00000070190	DAPP1	protein_coding	Q9UN19	0.00302207	NA	-1.24573	0.545599	0
ENSG00000070193	FGF10	protein_coding	O15520	NA	NA	NA	NA	0
ENSG00000070214	SLC44A1	protein_coding	Q8WWI5	-0.152129	0.224488	-0.157709	0.208953	0
ENSG00000070269	TMEM260	protein_coding	Q9NX78	0.201288	0.24205	0.440472	0.00444197	0
ENSG00000070366	SMG6	protein_coding	Q86US8	0.414531	1.46843e-07	0.333083	0.000656457	0
ENSG00000070367	EXOC5	protein_coding	O00471	-0.337379	0.00460258	-0.255855	0.014847	0
ENSG00000070371	CLTCL1	protein_coding	P53675	-0.0301791	0.806553	0.263525	0.0599083	0
ENSG00000070388	FGF22	protein_coding	Q9HCT0	0.519734	0.480793	1.23778	0.044934	0
ENSG00000070404	FSTL3	protein_coding	O95633	0.815378	0.0111388	1.05585	0.000206964	0
ENSG00000070413	DGCR2	protein_coding	P98153	0.787517	3.53916e-29	0.885046	8.11549e-25	0
ENSG00000070423	RNF126	protein_coding	Q9BV68	0.824192	4.47075e-23	0.822592	3.92499e-19	0
ENSG00000070444	MNT	protein_coding	Q99583	0.56738	1.68268e-06	0.795838	1.79216e-09	0
ENSG00000070476	ZXDC	protein_coding	Q2QGD7	0.583496	9.5938e-12	0.681807	1.09286e-11	0
ENSG00000070495	JMJD6	protein_coding	Q6NYC1	0.235799	0.0487096	-0.251292	0.0452948	0
ENSG00000070501	POLB	protein_coding	P06746	-0.826947	3.67051e-16	-0.842212	3.45411e-12	0
ENSG00000070526	ST6GALNAC1	protein_coding	Q9NSC7	0.428881	0.574955	1.59084	0.0192814	0
ENSG00000070540	WIPI1	protein_coding	Q5MNZ9	0.484231	0.0418792	0.310892	0.180263	0
ENSG00000070601	FRMPD1	protein_coding	Q5SYB0	-0.0966006	0.875679	0.0671352	0.891936	0
ENSG00000070610	GBA2	protein_coding	Q9HCG7	0.534125	3.06626e-10	1.01854	1.29215e-24	0
ENSG00000070614	NDST1	protein_coding	P52848	0.725139	3.35561e-19	1.18577	1.03254e-30	0
ENSG00000070669	ASNS	protein_coding	P08243	-0.634497	1.50913e-20	-0.769673	1.48205e-05	0
ENSG00000070718	AP3M2	protein_coding	P53677	0.0345909	0.834617	-0.20948	0.0251071	0
ENSG00000070729	CNGB1	protein_coding	Q14028	0.241453	NA	1.48301	NA	0
ENSG00000070731	ST6GALNAC2	protein_coding	Q9UJ37	0.302048	0.528456	0.866681	0.0738692	0
ENSG00000070748	CHAT	protein_coding	P28329	NA	NA	NA	NA	0
ENSG00000070756	PABPC1	protein_coding	P11940	-0.0914711	0.49176	-0.202658	0.356753	0
ENSG00000070759	TESK2	protein_coding	Q96S53	0.167348	0.53558	0.473082	0.0492052	0
ENSG00000070761	CFAP20	protein_coding	Q9Y6A4	-0.183872	0.108951	-0.465198	1.02629e-07	0
ENSG00000070770	CSNK2A2	protein_coding	P19784	-0.391978	6.59933e-10	-0.322608	6.59535e-05	0
ENSG00000070778	PTPN21	protein_coding	Q16825	0.504023	0.00563463	1.30104	1.52136e-13	0
ENSG00000070785	EIF2B3	protein_coding	Q9NR50	-0.607604	2.45442e-11	-0.579777	1.18133e-07	0
ENSG00000070808	CAMK2A	protein_coding	Q9UQM7	2.17011	NA	2.67566	NA	0
ENSG00000070814	TCOF1	protein_coding	Q13428	0.339389	0.00272234	0.287402	0.0726184	0
ENSG00000070831	CDC42	protein_coding	P60953	-0.771952	6.86229e-11	-1.24719	1.09994e-35	0
ENSG00000070882	OSBPL3	protein_coding	Q9H4L5	-0.100585	0.414681	0.327318	0.00327553	0
ENSG00000070886	EPHA8	protein_coding	P29322	0.202911	0.49884	-0.0151213	0.960513	0
ENSG00000070915	SLC12A3	protein_coding	P55017	0.934254	NA	1.6526	0.375381	0
ENSG00000070950	RAD18	protein_coding	Q9NS91	-0.332796	0.000729109	-0.580162	1.77646e-11	0
ENSG00000070961	ATP2B1	protein_coding	P20020	-0.376237	7.16932e-07	-0.224488	0.0149781	0
ENSG00000070985	TRPM5	protein_coding	Q9NZQ8	1.11203	0.232163	1.83261	0.0551936	0
ENSG00000071051	NCK2	protein_coding	O43639	-0.03824	0.879052	0.0453166	0.856719	0
ENSG00000071054	MAP4K4	protein_coding	O95819	0.180373	0.0903946	0.346761	0.00599021	0
ENSG00000071073	MGAT4A	protein_coding	Q9UM21	-0.175608	0.308272	0.238525	0.100942	0
ENSG00000071082	RPL31	protein_coding	P62899	0.652953	3.7283e-05	-0.897687	5.905e-11	0
ENSG00000071127	WDR1	protein_coding	O75083	-0.0336436	0.804671	-0.367978	0.00114816	0
ENSG00000071189	SNX13	protein_coding	Q9Y5W8	0.412703	0.000808537	0.44334	0.000213351	0
ENSG00000071203	MS4A12	protein_coding	Q9NXJ0	-0.690529	NA	NA	NA	0
ENSG00000071205	ARHGAP10	protein_coding	A1A4S6	0.286303	0.0387687	0.366814	0.00382544	0
ENSG00000071242	RPS6KA2	protein_coding	Q15349	1.0561	4.13523e-10	0.929401	3.00581e-07	0
ENSG00000071243	ING3	protein_coding	Q9NXR8	-0.463012	0.000128713	-0.740344	5.50381e-10	0
ENSG00000071246	VASH1	protein_coding	Q7L8A9	0.911934	4.29275e-06	1.33978	5.55263e-14	0
ENSG00000071282	LMCD1	protein_coding	Q9NZU5	0.148296	0.561509	-0.784268	2.24432e-05	0
ENSG00000071462	WBSCR22	protein_coding	#N/A	0.105615	0.648299	-0.898349	6.10907e-13	0
ENSG00000071537	SEL1L	protein_coding	Q9UBV2	-0.308464	0.000683231	-0.244168	0.0362032	0
ENSG00000071539	TRIP13	protein_coding	Q15645	-0.720809	3.91142e-12	-0.630674	2.78718e-07	0
ENSG00000071553	ATP6AP1	protein_coding	Q15904	0.188665	0.0796701	-0.532529	4.91482e-09	0
ENSG00000071564	TCF3	protein_coding	P15923	1.02812	2.38927e-37	1.20482	1.22555e-42	0
ENSG00000071575	TRIB2	protein_coding	Q92519	0.751113	0.00736256	0.630283	0.0173451	0
ENSG00000071626	DAZAP1	protein_coding	Q96EP5	-0.066394	0.423401	0.170221	0.117433	0
ENSG00000071655	MBD3	protein_coding	O95983	1.64007	1.91928e-45	1.43904	4.01131e-42	0
ENSG00000071677	PRLH	protein_coding	P81277	NA	NA	NA	NA	0
ENSG00000071794	HLTF	protein_coding	Q14527	-0.867602	3.40311e-22	-0.548311	0.00411643	0
ENSG00000071859	FAM50A	protein_coding	Q14320	0.270517	0.015266	-0.243014	0.105672	0
ENSG00000071889	FAM3A	protein_coding	P98173	1.01917	7.08232e-28	0.64006	8.54383e-13	0
ENSG00000071894	CPSF1	protein_coding	Q10570	0.942338	3.78556e-27	0.534804	1.13496e-07	0
ENSG00000071909	MYO3B	protein_coding	Q8WXR4	-1.09631	NA	NA	NA	0
ENSG00000071967	CYBRD1	protein_coding	Q53TN4	-0.200872	0.522975	-0.0738397	0.810377	0
ENSG00000071991	CDH19	protein_coding	Q9H159	NA	NA	NA	NA	0
ENSG00000071994	PDCD2	protein_coding	Q16342	0.273165	0.00645406	-0.182085	0.0935044	0
ENSG00000072041	SLC6A15	protein_coding	Q9H2J7	-0.556441	1.62747e-07	-0.535378	9.02904e-08	0
ENSG00000072042	RDH11	protein_coding	Q8TC12	0.0753158	0.503964	-0.310886	0.000180208	1
ENSG00000072062	PRKACA	protein_coding	P17612	0.210086	0.0257798	-0.245731	0.00671835	0
ENSG00000072071	ADGRL1	protein_coding	O94910	1.31715	2.51189e-62	1.40443	2.99369e-37	0
ENSG00000072080	SPP2	protein_coding	Q13103	-0.234446	NA	0.246368	NA	0
ENSG00000072110	ACTN1	protein_coding	P12814	0.307084	0.00250662	-0.0569652	0.694065	0
ENSG00000072121	ZFYVE26	protein_coding	Q68DK2	0.44635	8.45227e-06	1.18104	6.98349e-32	0
ENSG00000072133	RPS6KA6	protein_coding	Q9UK32	-0.311247	0.115426	0.387344	0.0549365	0
ENSG00000072134	EPN2	protein_coding	O95208	0.549201	1.29421e-06	-0.110194	0.466075	0
ENSG00000072135	PTPN18	protein_coding	Q99952	0.492079	1.07681e-05	0.091581	0.553514	0
ENSG00000072163	LIMS2	protein_coding	Q7Z4I7	0.920875	0.168764	1.19588	0.0415943	0
ENSG00000072182	ASIC4	protein_coding	Q96FT7	1.68776	0.0211606	2.23038	0.00306748	0
ENSG00000072195	SPEG	protein_coding	Q15772	1.62874	1.33083e-19	1.46782	1.88432e-11	0
ENSG00000072201	LNX1	protein_coding	Q8TBB1	0.422265	NA	-1.00581	NA	0
ENSG00000072210	ALDH3A2	protein_coding	P51648	-0.331163	0.000294326	-0.459868	1.16713e-06	1
ENSG00000072274	TFRC	protein_coding	P02786	-0.683017	0.26727	-1.02026	0.0444933	0
ENSG00000072310	SREBF1	protein_coding	P36956	0.586947	0.0267647	0.714914	0.00410243	0
ENSG00000072315	TRPC5	protein_coding	Q9UL62	0.606737	NA	1.26766	NA	0
ENSG00000072364	AFF4	protein_coding	Q9UHB7	-0.129927	0.324055	-0.0703887	0.517646	0
ENSG00000072401	UBE2D1	protein_coding	P51668	-0.847018	5.12091e-08	-0.90436	1.00204e-14	0
ENSG00000072415	MPP5	protein_coding	Q8N3R9	-0.969219	3.89731e-08	-0.733622	2.91049e-05	0
ENSG00000072422	RHOBTB1	protein_coding	O94844	0.0922774	0.691618	0.407207	0.0196871	0
ENSG00000072501	SMC1A	protein_coding	Q14683	-0.109612	0.562325	-0.248594	0.1728	0
ENSG00000072506	HSD17B10	protein_coding	Q99714	0.152907	0.311637	-0.993433	5.83742e-26	1
ENSG00000072518	MARK2	protein_coding	Q7KZI7	0.372405	2.03085e-05	0.388602	0.000289599	0
ENSG00000072571	HMMR	protein_coding	O75330	-0.612121	4.39065e-10	-0.393596	0.00206123	0
ENSG00000072609	CHFR	protein_coding	Q96EP1	1.23481	2.25779e-27	0.896774	5.01291e-21	0
ENSG00000072657	TRHDE	protein_coding	Q9UKU6	-0.301258	0.803824	0.00663067	0.994906	0
ENSG00000072682	P4HA2	protein_coding	O15460	-0.177334	0.129395	-0.538469	1.64869e-06	0
ENSG00000072694	FCGR2B	protein_coding	P31994	0.999335	NA	0.934708	NA	0
ENSG00000072736	NFATC3	protein_coding	Q12968	-0.0964166	0.519989	-0.126148	0.338659	0
ENSG00000072756	TRNT1	protein_coding	Q96Q11	-0.656892	1.09703e-07	-0.434399	0.00197933	1
ENSG00000072778	ACADVL	protein_coding	P49748	0.516085	6.59331e-09	0.0117654	0.928362	1
ENSG00000072786	STK10	protein_coding	O94804	0.646307	2.04988e-14	0.500537	3.6677e-09	0
ENSG00000072803	FBXW11	protein_coding	Q9UKB1	-0.50806	2.03314e-07	-0.517565	6.97548e-06	0
ENSG00000072818	ACAP1	protein_coding	Q15027	0.786291	0.0555473	1.08554	0.00371472	0
ENSG00000072832	CRMP1	protein_coding	Q14194	0.943557	0.000120539	0.811312	0.000625375	0
ENSG00000072840	EVC	protein_coding	P57679	1.11608	8.78071e-08	1.56295	1.04431e-14	0
ENSG00000072849	DERL2	protein_coding	Q9GZP9	-0.774003	1.16552e-21	-0.796098	4.2549e-10	0
ENSG00000072858	SIDT1	protein_coding	Q9NXL6	0.43602	0.339571	-0.389597	0.258422	0
ENSG00000072864	NDE1	protein_coding	Q9NXR1	-0.154807	NA	0.357635	NA	0
ENSG00000072952	MRVI1	protein_coding	Q9Y6F6	0.186597	0.900699	4.46953	0.0107497	0
ENSG00000072954	TMEM38A	protein_coding	Q9H6F2	0.530231	0.0945364	0.326086	0.316826	0
ENSG00000072958	AP1M1	protein_coding	Q9BXS5	-0.027017	0.872107	-0.283777	0.000332394	0
ENSG00000073008	PVR	protein_coding	P15151	0.450128	6.02166e-08	0.418136	5.64176e-06	0
ENSG00000073050	XRCC1	protein_coding	P18887	0.42152	8.77945e-05	0.0965673	0.7266	0
ENSG00000073060	SCARB1	protein_coding	Q8WTV0	0.430379	7.9717e-06	0.252687	0.00160988	0
ENSG00000073067	CYP2W1	protein_coding	Q8TAV3	2.02958	0.00501771	2.37542	0.000647083	0
ENSG00000073111	MCM2	protein_coding	P49736	0.0526017	0.706246	-0.132187	0.619669	0
ENSG00000073146	MOV10L1	protein_coding	Q9BXT6	0.357414	0.83743	1.08548	0.440493	0
ENSG00000073150	PANX2	protein_coding	Q96RD6	0.958805	3.19726e-05	1.05675	3.10809e-05	0
ENSG00000073169	SELENOO	protein_coding	Q9BVL4	0.977927	4.0186e-24	0.906005	1.60735e-14	1
ENSG00000073282	TP63	protein_coding	Q9H3D4	2.06745	NA	2.58876	NA	0
ENSG00000073331	ALPK1	protein_coding	Q96QP1	-0.326207	0.197739	-0.227902	0.391936	0
ENSG00000073350	LLGL2	protein_coding	Q6P1M3	0.866114	2.88068e-12	0.958709	5.86525e-17	0
ENSG00000073417	PDE8A	protein_coding	O60658	0.331238	0.023889	0.727766	6.19884e-09	0
ENSG00000073464	CLCN4	protein_coding	P51793	-0.105434	0.953619	0.863234	0.542552	0
ENSG00000073536	NLE1	protein_coding	Q9NVX2	0.654137	2.41222e-05	0.462793	0.00344814	0
ENSG00000073578	SDHA	protein_coding	P31040	-0.189783	0.0780016	-0.587485	1.02965e-08	1
ENSG00000073584	SMARCE1	protein_coding	Q969G3	-0.753198	0.000767639	-0.279522	0.100724	0
ENSG00000073598	FNDC8	protein_coding	Q8TC99	0.697523	0.428896	1.56792	0.0576565	0
ENSG00000073605	GSDMB	protein_coding	Q8TAX9	0.673262	0.0164608	1.34773	3.04064e-06	0
ENSG00000073614	KDM5A	protein_coding	P29375	1.02705	3.02825e-15	0.784386	2.38724e-05	0
ENSG00000073670	ADAM11	protein_coding	O75078	0.921978	1.16622e-09	1.02165	1.25123e-10	0
ENSG00000073711	PPP2R3A	protein_coding	Q06190	-0.727158	0.000333708	-0.234901	0.263346	0
ENSG00000073712	FERMT2	protein_coding	Q96AC1	-0.69431	3.42578e-16	-0.672261	5.02107e-06	0
ENSG00000073734	ABCB11	protein_coding	O95342	NA	NA	0.357635	NA	0
ENSG00000073737	DHRS9	protein_coding	Q9BPW9	-1.08239	0.555035	-1.21268	0.446058	0
ENSG00000073754	CD5L	protein_coding	O43866	NA	NA	-1.15686	NA	0
ENSG00000073756	PTGS2	protein_coding	P35354	-0.456977	0.152128	-0.78203	0.000519881	0
ENSG00000073792	IGF2BP2	protein_coding	Q9Y6M1	-0.130231	0.454225	-0.0782787	0.608711	0
ENSG00000073803	MAP3K13	protein_coding	O43283	-1.22192	1.62031e-22	-0.927863	7.97016e-09	0
ENSG00000073849	ST6GAL1	protein_coding	P15907	0.0101395	0.973199	0.156063	0.540168	0
ENSG00000073861	TBX21	protein_coding	Q9UL17	1.09521	0.456344	-0.861566	0.386004	0
ENSG00000073905	VDAC1P1	processed_pseudogene	#N/A	-0.902315	8.48052e-08	-0.734007	2.33597e-05	1
ENSG00000073910	FRY	protein_coding	Q5TBA9	0.461218	0.0268369	0.778447	9.3439e-05	0
ENSG00000073921	PICALM	protein_coding	Q13492	-0.518797	1.41154e-08	-0.748028	7.63156e-11	0
ENSG00000073969	NSF	protein_coding	P46459	0.47715	NA	-0.465333	NA	0
ENSG00000074047	GLI2	protein_coding	P10070	0.527913	0.0119566	0.882886	7.91522e-06	0
ENSG00000074054	CLASP1	protein_coding	Q7Z460	0.0818038	0.229979	0.158824	0.140805	0
ENSG00000074071	MRPS34	protein_coding	P82930	0.261463	0.194873	-0.457235	3.46738e-08	1
ENSG00000074181	NOTCH3	protein_coding	Q9UM47	0.848667	5.69779e-12	0.905541	5.84479e-16	0
ENSG00000074201	CLNS1A	protein_coding	P54105	-0.380388	0.00129172	-0.850472	3.0265e-22	0
ENSG00000074211	PPP2R2C	protein_coding	Q9Y2T4	0.809381	0.00194456	1.29	1.37489e-05	0
ENSG00000074219	TEAD2	protein_coding	Q15562	0.728022	5.87849e-08	0.896185	5.88123e-14	0
ENSG00000074266	EED	protein_coding	O75530	-0.182104	0.137618	-0.583193	5.08757e-11	0
ENSG00000074276	CDHR2	protein_coding	Q9BYE9	0.882731	0.0674386	1.3651	0.000760813	0
ENSG00000074317	SNCB	protein_coding	Q16143	-0.152644	0.697959	-0.848793	0.000340533	0
ENSG00000074319	TSG101	protein_coding	Q99816	-0.439238	1.06421e-05	-0.531704	5.0085e-06	0
ENSG00000074356	NCBP3	protein_coding	Q53F19	0.486684	1.58713e-20	0.301771	0.000573294	0
ENSG00000074370	ATP2A3	protein_coding	Q93084	0.574483	0.00157764	-0.139228	0.556836	0
ENSG00000074410	CA12	protein_coding	O43570	0.00363789	0.994292	0.0543867	0.895832	0
ENSG00000074416	MGLL	protein_coding	Q99685	0.360951	0.411546	0.299056	0.463673	0
ENSG00000074527	NTN4	protein_coding	Q9HB63	0.624589	0.0876294	-0.0690398	0.862142	0
ENSG00000074582	BCS1L	protein_coding	Q9Y276	0.0315864	0.822123	-0.102161	0.354795	1
ENSG00000074590	NUAK1	protein_coding	O60285	-0.0866998	0.700359	0.503061	0.000206044	0
ENSG00000074603	DPP8	protein_coding	Q6V1X1	0.147605	0.150243	0.434799	4.52457e-05	0
ENSG00000074621	SLC24A1	protein_coding	O60721	0.514563	0.00779413	0.896069	1.57617e-09	0
ENSG00000074657	ZNF532	protein_coding	Q9HCE3	1.28742	1.11649e-12	1.43799	5.28698e-15	0
ENSG00000074660	SCARF1	protein_coding	Q14162	NA	NA	NA	NA	0
ENSG00000074695	LMAN1	protein_coding	P49257	-0.632978	7.00045e-19	-0.620935	2.41396e-14	0
ENSG00000074696	HACD3	protein_coding	Q9P035	-0.316928	0.000812613	-1.09913	5.51743e-23	0
ENSG00000074706	IPCEF1	protein_coding	Q8WWN9	0.223253	0.810306	0.0886519	0.915802	0
ENSG00000074755	ZZEF1	protein_coding	O43149	0.427517	1.32227e-07	1.0348	2.78502e-32	0
ENSG00000074771	NOX3	protein_coding	Q9HBY0	NA	NA	NA	NA	0
ENSG00000074800	ENO1	protein_coding	P06733	0.220951	0.0221513	-0.576303	1.14623e-06	0
ENSG00000074803	SLC12A1	protein_coding	Q13621	0.171477	NA	2.29575	NA	0
ENSG00000074842	MYDGF	protein_coding	Q969H8	0.107589	0.551044	-0.265715	0.00276209	0
ENSG00000074855	ANO8	protein_coding	Q9HCE9	1.41671	2.34229e-40	1.20653	4.66873e-17	0
ENSG00000074935	TUBE1	protein_coding	Q9UJT0	0.317306	0.00355128	-0.128722	0.25206	0
ENSG00000074964	ARHGEF10L	protein_coding	Q9HCE6	1.22749	2.94364e-10	1.60288	5.40907e-17	0
ENSG00000074966	TXK	protein_coding	P42681	1.34604	0.318393	1.1717	0.31669	0
ENSG00000075035	WSCD2	protein_coding	Q2TBF2	-0.154807	NA	0.357635	NA	0
ENSG00000075043	KCNQ2	protein_coding	O43526	1.18837	1.02203e-05	1.08437	9.2884e-05	0
ENSG00000075073	TACR2	protein_coding	P21452	-0.643282	0.710472	0.0905978	0.960367	0
ENSG00000075089	ACTR6	protein_coding	Q9GZN1	-0.847483	1.99606e-13	-0.663517	2.82382e-06	0
ENSG00000075131	TIPIN	protein_coding	Q9BVW5	-0.827627	3.31311e-33	-0.847272	4.1867e-32	0
ENSG00000075142	SRI	protein_coding	P30626	-0.325246	0.0505427	-0.707499	3.91868e-06	0
ENSG00000075151	EIF4G3	protein_coding	O43432	0.388627	0.0189153	0.459734	0.0441807	0
ENSG00000075188	NUP37	protein_coding	Q8NFH4	-0.939076	1.4511e-23	-0.591607	2.34636e-05	0
ENSG00000075213	SEMA3A	protein_coding	Q14563	-0.229272	0.366181	-0.158632	0.507456	0
ENSG00000075218	GTSE1	protein_coding	Q9NYZ3	0.298197	0.000220225	-0.0201433	0.860262	0
ENSG00000075223	SEMA3C	protein_coding	Q99985	-0.313488	0.014919	-0.325543	0.000657969	0
ENSG00000075234	TTC38	protein_coding	Q5R3I4	0.177799	0.311801	0.161424	0.180865	0
ENSG00000075239	ACAT1	protein_coding	P24752	-0.942338	1.48579e-23	-0.924254	1.38299e-11	1
ENSG00000075240	GRAMD4	protein_coding	Q6IC98	0.675075	1.6568e-06	0.800917	1.18846e-10	0
ENSG00000075275	CELSR1	protein_coding	Q9NYQ6	0.660954	1.91344e-14	1.06071	2.50044e-30	0
ENSG00000075290	WNT8B	protein_coding	Q93098	1.18252	0.201503	-0.0660685	0.930032	0
ENSG00000075292	ZNF638	protein_coding	Q14966	-0.362057	6.37733e-07	-0.0546839	0.689684	0
ENSG00000075303	SLC25A40	protein_coding	Q8TBP6	-0.781444	1.69952e-05	-0.338651	0.11333	1
ENSG00000075336	TIMM21	protein_coding	Q9BVV7	0.0567576	0.75698	-0.411169	0.00417431	1
ENSG00000075340	ADD2	protein_coding	P35612	-0.262522	0.0971637	-0.30573	0.00884514	0
ENSG00000075388	FGF4	protein_coding	P08620	NA	NA	0.357635	NA	0
ENSG00000075391	RASAL2	protein_coding	Q9UJF2	0.0111556	0.96057	0.168198	0.290162	0
ENSG00000075399	VPS9D1	protein_coding	Q9Y2B5	1.15809	1.69208e-07	1.63611	1.65262e-13	0
ENSG00000075407	ZNF37A	protein_coding	P17032	-0.31683	0.197566	0.398182	0.0776167	0
ENSG00000075413	MARK3	protein_coding	P27448	-0.164488	0.0398963	0.0861407	0.36745	0
ENSG00000075415	SLC25A3	protein_coding	Q00325	-0.58284	3.98652e-13	-0.835246	1.81254e-20	1
ENSG00000075420	FNDC3B	protein_coding	Q53EP0	0.47874	1.07332e-05	0.3128	0.0375009	0
ENSG00000075426	FOSL2	protein_coding	P15408	0.647768	7.84421e-06	0.948276	9.42916e-07	0
ENSG00000075429	CACNG5	protein_coding	Q9UF02	0.620865	0.728538	0.576595	0.648796	0
ENSG00000075461	CACNG4	protein_coding	Q9UBN1	1.02316	0.200552	1.67667	0.0244275	0
ENSG00000075539	FRYL	protein_coding	O94915	-0.175503	0.0596451	0.510688	3.51032e-08	0
ENSG00000075568	TMEM131	protein_coding	Q92545	-0.656243	1.18712e-06	-0.0577802	0.714015	0
ENSG00000075618	FSCN1	protein_coding	Q16658	-0.0152886	0.944729	-0.29088	0.0686308	0
ENSG00000075624	ACTB	protein_coding	P60709	0.38679	0.0032304	-0.867111	8.94172e-17	0
ENSG00000075643	MOCOS	protein_coding	Q96EN8	-0.385433	0.0024748	0.0101007	0.965831	0
ENSG00000075651	PLD1	protein_coding	Q13393	-0.57574	9.70729e-05	-0.797151	6.05156e-08	0
ENSG00000075673	ATP12A	protein_coding	P54707	-0.158839	0.854969	-0.645679	0.25258	0
ENSG00000075702	WDR62	protein_coding	O43379	0.870336	9.71107e-16	1.2218	8.33232e-39	0
ENSG00000075711	DLG1	protein_coding	Q12959	-0.426073	2.5489e-06	-0.239969	0.0640386	0
ENSG00000075785	RAB7A	protein_coding	P51149	-0.722485	2.67356e-09	-0.982614	2.4913e-28	0
ENSG00000075790	BCAP29	protein_coding	Q9UHQ4	-1.13146	1.70183e-24	-0.770087	4.74252e-11	0
ENSG00000075826	SEC31B	protein_coding	Q9NQW1	0.89825	5.13401e-08	1.45309	1.08736e-12	0
ENSG00000075856	SART3	protein_coding	Q15020	0.110054	0.202976	0.0659278	0.517957	0
ENSG00000075884	ARHGAP15	protein_coding	Q53QZ3	-0.59618	NA	0.357635	NA	0
ENSG00000075886	TUBA3D	protein_coding	P0DPH8	0.056896	0.973005	1.86724	0.230564	0
ENSG00000075891	PAX2	protein_coding	Q02962	0.310616	0.347267	0.642722	0.0485969	0
ENSG00000075914	EXOSC7	protein_coding	Q15024	0.0270238	0.89512	-0.703295	7.71882e-16	0
ENSG00000075945	KIFAP3	protein_coding	Q92845	-0.984109	3.90684e-19	-0.67879	0.000472554	0
ENSG00000075975	MKRN2	protein_coding	Q9H000	-0.440832	5.33582e-10	-0.534479	3.09326e-09	0
ENSG00000076003	MCM6	protein_coding	Q14566	-0.620026	8.53229e-09	-0.614156	2.39812e-06	0
ENSG00000076043	REXO2	protein_coding	Q9Y3B8	0.329763	0.0548833	-0.0862319	0.691664	1
ENSG00000076053	RBM7	protein_coding	Q9Y580	-0.149756	0.529353	-0.593556	0.000677572	0
ENSG00000076067	RBMS2	protein_coding	Q15434	-0.243376	0.319094	0.0861973	0.701543	0
ENSG00000076108	BAZ2A	protein_coding	Q9UIF9	0.199985	0.0139807	0.50601	9.42559e-14	0
ENSG00000076201	PTPN23	protein_coding	Q9H3S7	0.136441	0.31955	0.273681	0.0813618	0
ENSG00000076242	MLH1	protein_coding	P40692	2.1778	0.171485	1.64164	0.207591	1
ENSG00000076248	UNG	protein_coding	P13051	-0.522206	0.00109262	-0.878272	1.53028e-14	1
ENSG00000076258	FMO4	protein_coding	P31512	-0.931306	0.000989987	-0.677222	0.0230557	0
ENSG00000076321	KLHL20	protein_coding	Q9Y2M5	0.087114	0.598137	-0.093876	0.5138	0
ENSG00000076344	RGS11	protein_coding	O94810	1.40505	0.174618	1.52772	0.0821715	0
ENSG00000076351	SLC46A1	protein_coding	Q96NT5	-0.238027	0.329013	-0.0223374	0.931136	0
ENSG00000076356	PLXNA2	protein_coding	O75051	0.596649	2.36045e-07	0.785179	7.31209e-13	0
ENSG00000076382	SPAG5	protein_coding	Q96R06	-0.421618	4.77049e-07	-0.383109	7.45266e-05	0
ENSG00000076513	ANKRD13A	protein_coding	Q8IZ07	-0.204696	0.0510338	-0.252562	0.00441666	0
ENSG00000076554	TPD52	protein_coding	P55327	-0.225073	0.279349	0.0248706	0.920984	0
ENSG00000076555	ACACB	protein_coding	O00763	1.009	2.14911e-18	1.4517	2.13344e-18	1
ENSG00000076604	TRAF4	protein_coding	Q9BUZ4	0.863452	1.08234e-13	0.463933	0.00011178	0
ENSG00000076641	PAG1	protein_coding	Q9NWQ8	-0.202684	0.36055	0.121159	0.529197	0
ENSG00000076650	GPATCH1	protein_coding	Q9BRR8	0.274232	0.0362412	0.268177	0.0823247	0
ENSG00000076662	ICAM3	protein_coding	P32942	-0.430868	NA	0.990332	NA	0
ENSG00000076685	NT5C2	protein_coding	P49902	-0.695826	3.54247e-13	-0.0663688	0.626547	0
ENSG00000076706	MCAM	protein_coding	P43121	0.0756199	0.661915	-0.111834	0.379052	0
ENSG00000076716	GPC4	protein_coding	O75487	0.174631	0.120857	-0.264738	0.0251224	0
ENSG00000076770	MBNL3	protein_coding	Q9NUK0	-1.08372	4.81268e-13	-0.37563	0.0262645	0
ENSG00000076826	CAMSAP3	protein_coding	Q9P1Y5	0.657311	3.8152e-07	0.81845	3.18526e-10	0
ENSG00000076864	RAP1GAP	protein_coding	P47736	0.384949	0.0645708	0.448935	0.0216417	0
ENSG00000076924	XAB2	protein_coding	Q9HCS7	0.625058	2.29137e-11	0.318056	0.0332637	0
ENSG00000076928	ARHGEF1	protein_coding	Q92888	0.501511	0.00042076	0.156794	0.415528	0
ENSG00000076944	STXBP2	protein_coding	Q15833	0.902883	2.96532e-07	0.57418	1.35606e-05	0
ENSG00000076984	MAP2K7	protein_coding	O14733	0.465476	8.23148e-05	0.7619	1.91889e-11	0
ENSG00000077009	NMRK2	protein_coding	Q9NPI5	0.620109	0.285741	1.09125	0.0403397	0
ENSG00000077044	DGKD	protein_coding	Q16760	0.984835	8.85619e-15	1.47538	3.96628e-28	0
ENSG00000077063	CTTNBP2	protein_coding	Q8WZ74	1.33171	9.47171e-36	0.802416	0.000767811	0
ENSG00000077080	ACTL6B	protein_coding	O94805	0.537758	0.519776	0.1352	0.88679	0
ENSG00000077092	RARB	protein_coding	P10826	-0.40032	0.00292885	-0.170884	0.438672	0
ENSG00000077097	TOP2B	protein_coding	Q02880	-0.70259	1.294e-09	-0.314812	0.0254711	0
ENSG00000077147	TM9SF3	protein_coding	Q9HD45	-0.3445	2.81116e-05	-0.428818	3.81921e-08	0
ENSG00000077150	NFKB2	protein_coding	Q00653	0.335568	0.000900988	0.221487	0.263374	0
ENSG00000077152	UBE2T	protein_coding	Q9NPD8	-0.851767	7.324e-26	-0.907044	2.12144e-31	0
ENSG00000077157	PPP1R12B	protein_coding	O60237	0.390051	0.0160676	0.626226	2.37477e-05	0
ENSG00000077232	DNAJC10	protein_coding	Q8IXB1	-0.547317	3.14355e-09	-0.273301	0.00328882	0
ENSG00000077235	GTF3C1	protein_coding	Q12789	0.25964	0.00270078	0.344624	0.106781	0
ENSG00000077238	IL4R	protein_coding	P24394	0.327689	0.143641	0.0447134	0.861249	0
ENSG00000077254	USP33	protein_coding	Q8TEY7	-0.611085	9.95706e-10	-0.240134	0.0618944	0
ENSG00000077264	PAK3	protein_coding	O75914	-0.0278743	0.974718	-0.434574	0.381298	0
ENSG00000077274	CAPN6	protein_coding	Q9Y6Q1	0.180075	0.913794	-1.24362	0.25174	0
ENSG00000077279	DCX	protein_coding	O43602	-0.361144	NA	-1.27664	0.49652	0
ENSG00000077312	SNRPA	protein_coding	P09012	0.269689	0.101685	-0.405415	0.00730187	0
ENSG00000077327	SPAG6	protein_coding	O75602	0.102728	0.900846	-0.183297	0.771582	0
ENSG00000077348	EXOSC5	protein_coding	Q9NQT4	0.225649	0.097512	-0.492128	2.11975e-08	0
ENSG00000077380	DYNC1I2	protein_coding	Q13409	-1.04972	5.83713e-19	-0.855408	2.25672e-05	0
ENSG00000077420	APBB1IP	protein_coding	Q7Z5R6	0.999335	NA	0.934708	NA	0
ENSG00000077454	LRCH4	protein_coding	O75427	0.811104	2.52697e-09	1.00988	1.05953e-13	0
ENSG00000077458	FAM76B	protein_coding	Q5HYJ3	-0.125261	0.422387	0.0267236	0.893317	0
ENSG00000077463	SIRT6	protein_coding	Q8N6T7	0.540439	8.59075e-05	0.329639	0.0256905	0
ENSG00000077498	TYR	protein_coding	P14679	-0.154807	NA	NA	NA	0
ENSG00000077514	POLD3	protein_coding	Q15054	-0.551946	0.000220141	-0.215496	0.188564	0
ENSG00000077522	ACTN2	protein_coding	P35609	1.17322	1.89053e-22	1.17954	1.53442e-24	0
ENSG00000077549	CAPZB	protein_coding	P47756	-0.0733966	0.637042	-0.310318	0.00682691	0
ENSG00000077585	GPR137B	protein_coding	O60478	0.0512198	0.891929	0.424439	0.151006	0
ENSG00000077616	NAALAD2	protein_coding	Q9Y3Q0	-0.80087	0.0107602	0.208331	0.604961	0
ENSG00000077684	JADE1	protein_coding	Q6IE81	0.181539	0.052258	0.298403	0.000162441	0
ENSG00000077713	SLC25A43	protein_coding	Q8WUT9	-0.161794	0.706327	0.0156388	0.970775	1
ENSG00000077721	UBE2A	protein_coding	P49459	-0.54503	1.55772e-16	-1.10912	8.26764e-32	0
ENSG00000077782	FGFR1	protein_coding	P11362	0.954736	4.6794e-26	0.956568	2.17282e-12	0
ENSG00000077800	FKBP6	protein_coding	O75344	0.428774	NA	2.05791	NA	0
ENSG00000077935	SMC1B	protein_coding	Q8NDV3	0.0257177	0.979016	-0.0767169	0.928662	0
ENSG00000077942	FBLN1	protein_coding	P23142	0.643091	1.22221e-12	-0.276944	0.00114609	0
ENSG00000077943	ITGA8	protein_coding	P53708	0.0303067	0.905909	-0.308638	0.0973063	0
ENSG00000077984	CST7	protein_coding	O76096	2.60659	0.00227303	1.03889	0.0838174	0
ENSG00000078018	MAP2	protein_coding	P11137	-0.473663	0.412014	-0.135341	0.826448	0
ENSG00000078043	PIAS2	protein_coding	O75928	-0.307429	0.0166689	-0.153586	0.267218	0
ENSG00000078053	AMPH	protein_coding	P49418	-0.423591	0.00796553	-0.115045	0.565747	0
ENSG00000078061	ARAF	protein_coding	P10398	0.685353	3.77339e-09	0.622486	4.87588e-08	0
ENSG00000078070	MCCC1	protein_coding	Q96RQ3	-0.375153	0.0103737	-0.0909135	0.634054	1
ENSG00000078081	LAMP3	protein_coding	Q9UQV4	-0.446631	0.285748	-0.64431	0.0471316	0
ENSG00000078098	FAP	protein_coding	Q12884	NA	NA	NA	NA	0
ENSG00000078114	NEBL	protein_coding	O76041	-0.390325	0.0176434	-0.109811	0.669862	0
ENSG00000078124	ACER3	protein_coding	Q9NUN7	-0.708231	1.03101e-08	-0.460145	0.00236641	0
ENSG00000078140	UBE2K	protein_coding	P61086	-0.410533	0.000258512	-0.723755	5.43121e-11	0
ENSG00000078142	PIK3C3	protein_coding	Q8NEB9	-0.424646	1.59751e-06	-0.414516	2.62428e-06	0
ENSG00000078177	N4BP2	protein_coding	Q86UW6	-0.785776	6.76612e-16	-0.152446	0.218974	0
ENSG00000078237	TIGAR	protein_coding	Q9NQ88	-0.350596	0.0379041	-0.540354	0.000223474	0
ENSG00000078246	TULP3	protein_coding	O75386	-0.394927	0.000163351	-0.84703	1.37346e-11	0
ENSG00000078269	SYNJ2	protein_coding	O15056	0.5108	3.20111e-07	0.638779	2.14072e-07	0
ENSG00000078295	ADCY2	protein_coding	Q08462	-0.201298	NA	1.51178	NA	0
ENSG00000078304	PPP2R5C	protein_coding	Q13362	-0.148903	0.10157	-0.326049	0.000842885	0
ENSG00000078319	PMS2P1	unprocessed_pseudogene	A4D2B8	-1.35486	1.09693e-05	-1.05677	0.000751527	0
ENSG00000078328	RBFOX1	protein_coding	Q9NWB1	NA	NA	0.357635	NA	0
ENSG00000078369	GNB1	protein_coding	P62873	-0.0633277	0.513102	-0.101272	0.21633	0
ENSG00000078399	HOXA9	protein_coding	P31269	0.0662014	0.628634	0.00887772	0.974251	0
ENSG00000078401	EDN1	protein_coding	P05305	-0.445342	0.71321	-0.566982	0.583116	0
ENSG00000078403	MLLT10	protein_coding	P55197	-0.146815	0.327209	0.436844	0.00231775	0
ENSG00000078487	ZCWPW1	protein_coding	Q9H0M4	0.979027	5.26772e-05	0.708311	0.00136109	0
ENSG00000078549	ADCYAP1R1	protein_coding	P41586	0.142991	0.613803	0.430438	0.0697754	0
ENSG00000078579	FGF20	protein_coding	Q9NP95	-0.909285	NA	-1.65865	0.336638	0
ENSG00000078589	P2RY10	protein_coding	O00398	NA	NA	NA	NA	0
ENSG00000078596	ITM2A	protein_coding	O43736	0.708944	0.574246	-0.383272	0.677705	0
ENSG00000078618	NRDC	protein_coding	O43847	-0.62559	1.83385e-16	-0.238531	0.0534294	1
ENSG00000078668	VDAC3	protein_coding	Q9Y277	-1.33112	1.24539e-48	-1.0543	2.82454e-27	1
ENSG00000078674	PCM1	protein_coding	Q15154	-0.242878	0.00754698	0.112751	0.261708	0
ENSG00000078687	TNRC6C	protein_coding	Q9HCJ0	0.557899	6.08046e-07	0.708356	2.31926e-09	0
ENSG00000078699	CBFA2T2	protein_coding	O43439	0.330636	0.00209515	0.177685	0.198933	0
ENSG00000078725	BRINP1	protein_coding	O60477	1.50442	NA	2.01946	NA	0
ENSG00000078747	ITCH.1	protein_coding	#N/A	-0.819514	4.11037e-08	0.177622	0.387897	0
ENSG00000078795	PKD2L2	protein_coding	Q9NZM6	0.129779	0.863313	0.897501	0.097778	0
ENSG00000078804	TP53INP2	protein_coding	Q8IXH6	-0.171974	0.648996	0.67402	6.46629e-05	0
ENSG00000078808	SDF4	protein_coding	Q9BRK5	0.699215	4.40628e-13	0.0221252	0.830739	0
ENSG00000078814	MYH7B	protein_coding	A7E2Y1	1.33159	0.00109803	1.79878	2.06917e-05	0
ENSG00000078898	BPIFB2	protein_coding	Q8N4F0	-0.154807	NA	NA	NA	0
ENSG00000078900	TP73	protein_coding	O15350	0.480803	0.00973989	0.64382	0.000400006	0
ENSG00000078902	TOLLIP	protein_coding	Q9H0E2	0.801159	3.51746e-16	-0.383171	0.00065944	0
ENSG00000078967	UBE2D4	protein_coding	Q9Y2X8	0.0831782	0.804138	0.526449	0.051772	0
ENSG00000079101	CLUL1	protein_coding	Q15846	1.19315	0.0638762	0.629204	0.220584	0
ENSG00000079102	RUNX1T1	protein_coding	Q06455	0.291784	0.0780578	0.0719631	0.677963	0
ENSG00000079112	CDH17	protein_coding	Q12864	2.53039	NA	1.78363	NA	0
ENSG00000079134	THOC1	protein_coding	Q96FV9	-0.351113	0.000250345	-0.233454	0.020015	0
ENSG00000079150	FKBP7	protein_coding	Q9Y680	-0.860785	2.42111e-14	-1.33593	1.66212e-16	0
ENSG00000079156	OSBPL6	protein_coding	Q9BZF3	-0.631151	2.15127e-08	-0.0839628	0.661708	0
ENSG00000079215	SLC1A3	protein_coding	P43003	-0.961866	0.0104024	-0.436985	0.0678044	0
ENSG00000079246	XRCC5	protein_coding	P13010	-0.572155	1.89905e-09	-0.905607	1.19105e-18	0
ENSG00000079257	LXN	protein_coding	Q9BS40	-0.654494	0.030049	-0.644118	0.0463247	0
ENSG00000079263	SP140	protein_coding	Q13342	-0.59618	NA	0.357635	NA	0
ENSG00000079277	MKNK1	protein_coding	Q9BUB5	-0.240081	0.123237	-0.164475	0.246771	0
ENSG00000079308	TNS1	protein_coding	Q9HBL0	0.383897	0.462086	0.802123	0.0587242	0
ENSG00000079313	REXO1	protein_coding	Q8N1G1	1.12646	5.94697e-25	1.35254	3.22369e-41	0
ENSG00000079332	SAR1A	protein_coding	Q9NR31	-0.358672	5.26772e-05	-0.803109	1.6488e-14	0
ENSG00000079335	CDC14A	protein_coding	Q9UNH5	-0.297364	0.105815	0.00622255	0.980328	0
ENSG00000079337	RAPGEF3	protein_coding	O95398	0.897355	0.0560303	1.04803	0.0114599	0
ENSG00000079385	CEACAM1	protein_coding	P13688	-0.214153	0.86561	1.97375	0.0621519	0
ENSG00000079387	SENP1	protein_coding	Q9P0U3	-0.148837	0.127729	-0.152449	0.169237	0
ENSG00000079393	DUSP13	protein_coding	Q9UII6	-0.338552	NA	-0.606455	0.766962	0
ENSG00000079432	CIC	protein_coding	Q96RK0	0.89459	1.02857e-11	1.35861	1.6767e-26	0
ENSG00000079435	LIPE	protein_coding	Q05469	0.433126	0.0119194	0.708437	2.47743e-05	0
ENSG00000079459	FDFT1	protein_coding	P37268	-0.103436	0.649372	-0.516161	0.000406331	0
ENSG00000079462	PAFAH1B3	protein_coding	Q15102	0.322297	0.0500798	-0.224777	0.122643	0
ENSG00000079482	OPHN1	protein_coding	O60890	-0.143086	0.475811	0.0807631	0.6754	0
ENSG00000079557	AFM	protein_coding	P43652	NA	NA	0.357635	NA	0
ENSG00000079616	KIF22	protein_coding	Q14807	0.0752214	0.558862	-0.097612	0.332203	0
ENSG00000079689	SCGN	protein_coding	O76038	1.84386	NA	0.781676	NA	0
ENSG00000079691	CARMIL1	protein_coding	Q5VZK9	-0.386543	0.00509758	0.0081168	0.974995	0
ENSG00000079739	PGM1	protein_coding	P36871	-0.302594	0.000716538	-0.672884	2.54232e-06	0
ENSG00000079785	DDX1	protein_coding	Q92499	-1.45088	1.25148e-51	-1.05397	6.5673e-07	0
ENSG00000079805	DNM2	protein_coding	P50570	0.683992	1.2271e-11	0.491285	7.07692e-06	0
ENSG00000079819	EPB41L2	protein_coding	O43491	-0.219283	0.0181929	-0.485246	0.00123018	0
ENSG00000079841	RIMS1	protein_coding	Q86UR5	-0.191796	0.835674	0.496803	0.560862	0
ENSG00000079931	MOXD1	protein_coding	Q6UVY6	-0.415329	0.0217361	-0.390834	0.0267111	0
ENSG00000079950	STX7	protein_coding	O15400	-0.999764	9.28912e-16	-0.505619	1.32416e-05	0
ENSG00000079974	RABL2B	protein_coding	Q9UNT1	0.842003	0.00514896	1.1104	0.000116405	0
ENSG00000079999	KEAP1	protein_coding	Q14145	0.4501	1.781e-08	0.54268	6.47984e-12	0
ENSG00000080007	DDX43	protein_coding	Q9NXZ2	0.377675	NA	2.36586	NA	0
ENSG00000080031	PTPRH	protein_coding	Q9HD43	1.33107	0.0483475	0.991005	0.101373	0
ENSG00000080166	DCT	protein_coding	P40126	-0.0261431	0.983974	0.25799	0.78242	0
ENSG00000080189	SLC35C2	protein_coding	Q9NQQ7	1.13141	9.05666e-28	0.907557	3.08042e-09	0
ENSG00000080200	CRYBG3	protein_coding	Q68DQ2	-0.889511	3.4977e-11	-0.460751	0.00432812	0
ENSG00000080224	EPHA6	protein_coding	Q9UF33	0.250574	0.335812	0.262041	0.271755	0
ENSG00000080293	SCTR	protein_coding	P47872	1.2187	NA	1.67609	NA	0
ENSG00000080298	RFX3	protein_coding	P48380	0.187544	0.292526	0.065076	0.709348	0
ENSG00000080345	RIF1	protein_coding	Q5UIP0	-0.602824	1.85189e-19	-0.246755	0.0011567	0
ENSG00000080371	RAB21	protein_coding	Q9UL25	-0.578105	1.62399e-07	-0.433262	0.00150696	0
ENSG00000080493	SLC4A4	protein_coding	Q9Y6R1	-0.426757	0.105588	-0.416648	0.0904148	0
ENSG00000080503	SMARCA2	protein_coding	P51531	0.0527703	0.655109	0.202437	0.140854	0
ENSG00000080511	RDH8	protein_coding	Q9NYR8	0.999335	NA	0.934708	NA	0
ENSG00000080546	SESN1	protein_coding	Q9Y6P5	-0.65119	1.69187e-10	-0.288025	0.038163	0
ENSG00000080561	MID2	protein_coding	Q9UJV3	0.100615	0.66718	0.280669	0.134198	0
ENSG00000080572	PIH1D3	protein_coding	Q9NQM4	-0.987508	NA	-0.996915	NA	0
ENSG00000080573	COL5A3	protein_coding	P25940	0.381451	0.825307	0.329985	0.824312	0
ENSG00000080603	SRCAP	protein_coding	Q6ZRS2	-0.167899	0.374765	-0.0347501	0.861336	0
ENSG00000080608	PUM3	protein_coding	Q15397	-0.677163	8.42539e-09	-0.707395	2.11687e-05	0
ENSG00000080618	CPB2	protein_coding	Q96IY4	0.212063	NA	1.20713	0.563708	0
ENSG00000080644	CHRNA3	protein_coding	P32297	1.01569	3.89165e-11	0.598189	0.00128805	0
ENSG00000080709	KCNN2	protein_coding	Q9H2S1	0.346723	0.690274	0.860047	0.201585	0
ENSG00000080802	CNOT4	protein_coding	O95628	-0.367205	4.12721e-06	-0.298739	0.000836668	0
ENSG00000080815	PSEN1	protein_coding	P49768	0.0595652	0.651692	0.0758946	0.647838	0
ENSG00000080819	CPOX	protein_coding	P36551	-0.128577	0.255048	-0.33061	0.000215768	1
ENSG00000080822	CLDND1	protein_coding	Q9NY35	-0.156655	0.380504	-0.0951138	0.604811	0
ENSG00000080823	MOK	protein_coding	Q9UQ07	0.961858	1.07529e-12	1.13195	2.29738e-19	0
ENSG00000080824	HSP90AA1	protein_coding	P07900	0.0213224	0.893588	-0.83974	1.99238e-10	0
ENSG00000080839	RBL1	protein_coding	P28749	-0.506737	4.60926e-06	-0.198284	0.0761253	0
ENSG00000080845	DLGAP4	protein_coding	Q9Y2H0	-0.484576	0.00109184	-0.132513	0.48779	0
ENSG00000080854	IGSF9B	protein_coding	Q9UPX0	1.00201	9.97312e-12	1.39197	8.32492e-21	0
ENSG00000080910	CFHR2	protein_coding	P36980	NA	NA	NA	NA	0
ENSG00000080947	CROCCP3	transcribed_unprocessed_pseudogene	Q8IVE0	1.51288	1.50864e-15	1.59084	2.59303e-15	0
ENSG00000080986	NDC80	protein_coding	O14777	-0.697626	1.19111e-19	-0.462202	0.000116461	0
ENSG00000081014	AP4E1	protein_coding	Q9UPM8	-0.956937	9.93332e-12	-0.234117	0.166432	0
ENSG00000081019	RSBN1	protein_coding	Q5VWQ0	0.24186	0.0127385	0.261455	0.00859586	0
ENSG00000081026	MAGI3	protein_coding	Q5TCQ9	0.383774	0.0232055	0.147787	0.426234	0
ENSG00000081041	CXCL2	protein_coding	P19875	2.57114	0.0634218	0.950772	0.348477	0
ENSG00000081051	AFP	protein_coding	P02771	NA	NA	NA	NA	0
ENSG00000081052	COL4A4	protein_coding	P53420	-0.344924	0.321524	-0.119824	0.75014	0
ENSG00000081059	TCF7	protein_coding	P36402	0.43961	0.0439313	1.0186	2.276e-06	0
ENSG00000081087	OSTM1	protein_coding	Q86WC4	-0.410471	0.00279878	-0.275624	0.0563655	0
ENSG00000081138	CDH7	protein_coding	Q9ULB5	-1.08132	NA	-1.66878	0.30655	0
ENSG00000081148	IMPG2	protein_coding	Q9BZV3	0.524635	0.497127	1.85447	0.0104604	0
ENSG00000081154	PCNP	protein_coding	Q8WW12	-0.637098	1.48124e-05	-0.671306	2.07015e-05	0
ENSG00000081177	EXD2	protein_coding	Q9NVH0	-0.321488	0.0185115	-0.165631	0.25434	0
ENSG00000081181	ARG2	protein_coding	P78540	-0.577468	8.66649e-06	-1.03034	2.79124e-18	1
ENSG00000081189	MEF2C	protein_coding	Q06413	-0.480915	0.000845636	-0.486493	0.000179863	0
ENSG00000081237	PTPRC	protein_coding	P08575	NA	NA	0.357635	NA	0
ENSG00000081248	CACNA1S	protein_coding	Q13698	0.617278	NA	0.697315	NA	0
ENSG00000081277	PKP1	protein_coding	Q13835	-0.154807	NA	NA	NA	0
ENSG00000081307	UBA5	protein_coding	Q9GZZ9	-0.868396	5.46364e-18	-0.659047	2.99052e-09	0
ENSG00000081320	STK17B	protein_coding	O94768	-0.464447	1.47468e-05	-0.289761	0.0151499	0
ENSG00000081377	CDC14B	protein_coding	O60729	0.459591	0.00216856	0.640164	6.41757e-05	0
ENSG00000081386	ZNF510	protein_coding	Q9Y2H8	-0.423802	0.0796701	0.389539	0.102558	0
ENSG00000081479	LRP2	protein_coding	P98164	-0.164737	0.29369	0.09485	0.454957	0
ENSG00000081665	ZNF506	protein_coding	Q5JVG8	-1.10602	0.00981722	-0.739789	0.0846264	0
ENSG00000081692	JMJD4	protein_coding	Q9H9V9	0.586807	0.00036354	0.590162	9.65006e-05	0
ENSG00000081721	DUSP12	protein_coding	Q9UNI6	-0.418558	0.00940706	-0.136441	0.496007	0
ENSG00000081760	AACS	protein_coding	Q86V21	0.371997	0.000595119	0.0866761	0.641149	0
ENSG00000081791	KIAA0141	protein_coding	#N/A	0.182862	0.143366	0.12382	0.339499	1
ENSG00000081800	SLC13A1	protein_coding	Q9BZW2	NA	NA	NA	NA	0
ENSG00000081803	CADPS2	protein_coding	Q86UW7	-0.398702	0.0140761	-0.219541	0.254231	0
ENSG00000081818	PCDHB4	protein_coding	Q9Y5E5	1.28753	NA	1.21075	NA	0
ENSG00000081842	PCDHA6	protein_coding	Q9UN73	NA	NA	NA	NA	0
ENSG00000081853	PCDHGA2	protein_coding	Q9Y5H1	2.33272	NA	1.17381	0.570074	0
ENSG00000081870	HSPB11	protein_coding	Q9Y547	-1.30937	9.28878e-36	-1.26995	2.14121e-33	0
ENSG00000081913	PHLPP1	protein_coding	O60346	0.105212	0.594671	0.247231	0.139268	0
ENSG00000081923	ATP8B1	protein_coding	O43520	0.0280096	0.961421	0.967519	0.0110368	0
ENSG00000081985	IL12RB2	protein_coding	Q99665	-0.186099	0.632753	0.432437	0.176663	0
ENSG00000082014	SMARCD3	protein_coding	Q6STE5	1.2315	8.90853e-23	0.989404	4.48428e-14	0
ENSG00000082068	WDR70	protein_coding	Q9NW82	-0.0855801	0.427265	-0.108735	0.262481	0
ENSG00000082074	FYB	protein_coding	#N/A	-0.154807	NA	NA	NA	0
ENSG00000082126	MPP4	protein_coding	Q96JB8	-0.543139	0.680063	1.09799	0.427421	0
ENSG00000082146	STRADB	protein_coding	Q9C0K7	-0.0592648	0.813363	0.0780943	0.688466	0
ENSG00000082153	BZW1	protein_coding	Q7L1Q6	-1.0233	2.47258e-22	-1.18835	8.07864e-19	0
ENSG00000082175	PGR	protein_coding	P06401	-0.675219	NA	0.386466	NA	0
ENSG00000082196	C1QTNF3	protein_coding	Q9BXJ4	0.158128	0.937209	3.37676	NA	0
ENSG00000082212	ME2	protein_coding	P23368	-0.845956	2.45119e-24	-0.797553	1.50815e-06	1
ENSG00000082213	C5orf22	protein_coding	Q49AR2	-0.790208	3.05704e-19	-0.452462	0.00018802	0
ENSG00000082258	CCNT2	protein_coding	O60583	-0.578017	4.70504e-09	-0.0100286	0.950726	0
ENSG00000082269	FAM135A	protein_coding	Q9P2D6	-0.458642	6.79548e-05	0.185579	0.208623	0
ENSG00000082293	COL19A1	protein_coding	Q14993	0.00802939	0.991718	-0.26662	0.598573	0
ENSG00000082397	EPB41L3	protein_coding	Q9Y2J2	-0.469244	5.11503e-08	-0.511188	0.00461097	0
ENSG00000082438	COBLL1	protein_coding	Q53SF7	-0.608426	3.6778e-05	-0.488354	0.00581046	0
ENSG00000082458	DLG3	protein_coding	Q92796	-0.166058	0.342552	-0.315385	0.0200376	0
ENSG00000082482	KCNK2	protein_coding	O95069	-0.59618	NA	NA	NA	0
ENSG00000082497	SERTAD4	protein_coding	Q9NUC0	-0.154807	NA	NA	NA	0
ENSG00000082512	TRAF5	protein_coding	O00463	-0.3757	0.0922101	-0.0525142	0.874341	0
ENSG00000082515	MRPL22	protein_coding	Q9NWU5	-0.716211	2.01928e-09	-1.10479	1.31357e-26	1
ENSG00000082516	GEMIN5	protein_coding	Q8TEQ6	-0.565591	3.54844e-16	-0.211942	0.0458511	0
ENSG00000082556	OPRK1	protein_coding	P41145	1.00655	NA	1.38133	NA	0
ENSG00000082641	NFE2L1	protein_coding	Q14494	0.140617	0.231139	-0.0431464	0.697643	0
ENSG00000082684	SEMA5B	protein_coding	Q9P283	1.08057	0.142904	1.35013	0.0327675	0
ENSG00000082701	GSK3B	protein_coding	P49841	-0.0301386	0.829894	0.0693867	0.482939	0
ENSG00000082781	ITGB5	protein_coding	P18084	0.26525	0.123863	0.464354	0.0047494	0
ENSG00000082805	ERC1	protein_coding	Q8IUD2	0.0290649	0.857308	0.165614	0.19132	0
ENSG00000082898	XPO1	protein_coding	O14980	-1.17273	2.54511e-55	-0.492695	9.89879e-08	0
ENSG00000082929	LINC01587	processed_transcript	Q99440	-0.154807	NA	NA	NA	0
ENSG00000082996	RNF13	protein_coding	O43567	-0.428265	0.00182762	-0.440192	0.000875961	0
ENSG00000083067	TRPM3	protein_coding	Q9HCF6	-0.615551	0.726087	1.3828	0.495664	0
ENSG00000083093	PALB2	protein_coding	Q86YC2	0.0102527	0.954248	0.341578	0.0086456	0
ENSG00000083097	DOPEY1	protein_coding	Q5JWR5	-0.401294	0.0042193	0.199221	0.187399	0
ENSG00000083099	LYRM2	protein_coding	Q9NU23	-1.3391	2.02511e-39	-1.1074	1.04516e-18	1
ENSG00000083123	BCKDHB	protein_coding	P21953	-0.631711	0.000449772	-0.888442	8.28721e-09	1
ENSG00000083168	KAT6A	protein_coding	Q92794	0.183998	0.0518374	0.511978	2.26276e-07	0
ENSG00000083223	ZCCHC6	protein_coding	#N/A	-0.160053	0.183329	0.347366	0.00201614	0
ENSG00000083290	ULK2	protein_coding	Q8IYT8	0.785263	7.34033e-10	1.40972	2.89136e-24	0
ENSG00000083307	GRHL2	protein_coding	Q6ISB3	1.01539	NA	2.19292	NA	0
ENSG00000083312	TNPO1	protein_coding	Q92973	-0.679425	2.75013e-12	-0.510068	0.000181396	0
ENSG00000083444	PLOD1	protein_coding	Q02809	0.63025	1.05662e-10	0.278454	0.0327476	0
ENSG00000083454	P2RX5	protein_coding	Q93086	0.542904	0.576824	2.67687	0.00802202	0
ENSG00000083457	ITGAE	protein_coding	P38570	-0.0899426	0.54954	0.0720484	0.631	0
ENSG00000083520	DIS3	protein_coding	Q9Y2L1	-0.408456	1.30951e-05	-0.658934	0.00230848	0
ENSG00000083535	PIBF1	protein_coding	Q8WXW3	-0.672505	1.69381e-19	-0.273474	0.00283918	0
ENSG00000083544	TDRD3	protein_coding	Q9H7E2	-0.536123	2.91292e-07	-0.314088	0.0121195	0
ENSG00000083622	AC000111.6	antisense	#N/A	NA	NA	-1.58441	NA	0
ENSG00000083635	NUFIP1	protein_coding	Q9UHK0	-0.229666	0.270439	-0.333427	0.0809422	0
ENSG00000083642	PDS5B	protein_coding	Q9NTI5	-0.403968	2.30363e-06	-0.04053	0.794165	0
ENSG00000083720	OXCT1	protein_coding	P55809	-0.590189	1.65531e-11	-0.488585	0.000545559	1
ENSG00000083750	RRAGB	protein_coding	Q5VZM2	-0.176618	0.312497	-0.00917214	0.966948	0
ENSG00000083782	EPYC	protein_coding	Q99645	NA	NA	NA	NA	0
ENSG00000083799	CYLD	protein_coding	Q9NQC7	-0.262199	0.142531	0.269229	0.0422934	0
ENSG00000083807	SLC27A5	protein_coding	Q9Y2P5	-0.338605	0.218333	-0.317171	0.139157	0
ENSG00000083812	ZNF324	protein_coding	O75467	0.346077	0.0225592	0.537534	1.81873e-05	0
ENSG00000083814	ZNF671	protein_coding	Q8TAW3	0.307696	0.678916	0.369782	0.576436	0
ENSG00000083817	ZNF416	protein_coding	Q9BWM5	0.109809	0.680236	-0.334423	0.10393	0
ENSG00000083828	ZNF586	protein_coding	Q9NXT0	0.594492	0.000266787	-0.194865	0.268658	0
ENSG00000083838	ZNF446	protein_coding	Q9NWS9	1.09177	2.86479e-05	0.797612	7.26834e-05	0
ENSG00000083844	ZNF264	protein_coding	O43296	-0.0422694	0.850325	-0.0753426	0.686785	0
ENSG00000083845	RPS5	protein_coding	P46782	-0.275551	0.00218913	-0.667579	6.46687e-15	0
ENSG00000083857	FAT1	protein_coding	Q14517	-0.0118438	0.934938	0.20526	0.0287381	0
ENSG00000083896	YTHDC1	protein_coding	Q96MU7	0.128913	0.740551	-0.392883	0.0988254	0
ENSG00000083937	CHMP2B	protein_coding	Q9UQN3	-1.03962	1.93438e-31	-0.929163	6.30009e-10	0
ENSG00000084070	SMAP2	protein_coding	Q8WU79	-0.609931	3.07617e-13	-0.246854	0.0757529	0
ENSG00000084072	PPIE	protein_coding	Q9UNP9	-0.303772	0.000536529	-0.720909	4.13845e-19	0
ENSG00000084073	ZMPSTE24	protein_coding	O75844	-0.733435	7.99677e-21	-0.701737	2.13596e-15	0
ENSG00000084090	STARD7	protein_coding	Q9NQZ5	0.355508	0.000428371	0.541947	1.20069e-05	1
ENSG00000084092	NOA1	protein_coding	Q8NC60	0.41734	2.51985e-05	0.357197	0.00131563	1
ENSG00000084093	REST	protein_coding	Q13127	-0.584371	4.78931e-10	-0.397387	0.000968069	0
ENSG00000084110	HAL	protein_coding	P42357	1.27396	0.0150631	1.5862	0.0027096	0
ENSG00000084112	SSH1	protein_coding	Q8WYL5	0.676489	1.08559e-09	1.34548	1.0007e-28	0
ENSG00000084207	GSTP1	protein_coding	P09211	0.246058	0.0394477	-0.898081	8.00085e-16	0
ENSG00000084234	APLP2	protein_coding	Q06481	-0.0273013	0.760885	-0.858034	1.64507e-26	0
ENSG00000084444	FAM234B	protein_coding	A2RU67	0.0101518	0.962266	-0.33406	0.0101259	0
ENSG00000084453	SLCO1A2	protein_coding	P46721	0.496145	NA	-0.455127	NA	0
ENSG00000084463	WBP11	protein_coding	Q9Y2W2	-0.49494	1.67245e-05	-0.466185	6.11266e-05	0
ENSG00000084623	EIF3I	protein_coding	Q13347	-0.273365	0.0154077	-0.941211	1.55821e-19	0
ENSG00000084628	NKAIN1	protein_coding	Q4KMZ8	0.793678	0.00105998	1.20963	4.07854e-08	0
ENSG00000084636	COL16A1	protein_coding	Q07092	0.362924	0.842947	0.569127	0.715983	0
ENSG00000084652	TXLNA	protein_coding	P40222	0.0284899	0.786606	0.0734376	0.481479	0
ENSG00000084674	APOB	protein_coding	P04114	-1.8395	NA	0.357635	NA	0
ENSG00000084676	NCOA1	protein_coding	Q15788	-0.479331	0.000116799	-0.211055	0.211663	0
ENSG00000084693	AGBL5	protein_coding	Q8NDL9	0.940945	6.8327e-16	0.700953	4.96992e-07	0
ENSG00000084710	EFR3B	protein_coding	Q9Y2G0	0.240645	0.134345	0.318221	0.0528421	0
ENSG00000084731	KIF3C	protein_coding	O14782	0.384631	0.0208584	0.768887	4.38757e-07	0
ENSG00000084733	RAB10	protein_coding	P61026	-0.546292	1.81138e-13	-0.43811	6.70121e-05	0
ENSG00000084734	GCKR	protein_coding	Q14397	1.06939	0.218312	1.47534	0.140899	0
ENSG00000084754	HADHA	protein_coding	P40939	-0.412534	8.41877e-07	-0.277236	0.0753748	1
ENSG00000084764	MAPRE3	protein_coding	Q9UPY8	0.121147	0.436966	-0.298457	0.0244198	0
ENSG00000084774	CAD	protein_coding	P27708	0.0294076	0.917726	0.110131	0.815232	0
ENSG00000085063	CD59	protein_coding	P13987	-0.853604	7.57098e-19	-0.939805	5.84974e-20	0
ENSG00000085117	CD82	protein_coding	P27701	-0.31226	0.281457	-0.779259	0.000915274	0
ENSG00000085185	BCORL1	protein_coding	Q5H9F3	0.0373467	0.845729	-0.332258	0.00957824	0
ENSG00000085224	ATRX	protein_coding	P46100	-0.422584	2.23304e-11	0.148749	0.0489896	0
ENSG00000085231	AK6	protein_coding	Q9Y3D8	NA	NA	NA	NA	0
ENSG00000085265	FCN1	protein_coding	O00602	NA	NA	NA	NA	0
ENSG00000085274	MYNN	protein_coding	Q9NPC7	-0.274773	0.0538094	-0.573663	0.0077364	0
ENSG00000085276	MECOM	protein_coding	Q03112	-0.733273	4.05589e-15	-0.516624	4.23755e-06	0
ENSG00000085365	SCAMP1	protein_coding	O15126	-0.860209	2.07674e-16	-0.977741	1.40802e-20	0
ENSG00000085377	PREP	protein_coding	P48147	-0.165057	0.0611322	-0.348415	0.00815524	0
ENSG00000085382	HACE1	protein_coding	Q8IYU2	-0.288625	0.0578798	0.12723	0.408651	0
ENSG00000085415	SEH1L	protein_coding	Q96EE3	-0.510396	0.000932414	-0.68957	3.30744e-07	0
ENSG00000085433	WDR47	protein_coding	O94967	-0.209914	0.146603	-0.0376805	0.75702	0
ENSG00000085449	WDFY1	protein_coding	Q8IWB7	-0.21402	0.0534783	-0.323722	0.000796477	0
ENSG00000085465	OVGP1	protein_coding	Q12889	0.446963	0.0244985	1.51928	2.55319e-09	0
ENSG00000085491	SLC25A24	protein_coding	Q6NUK1	-0.94084	1.24203e-19	-0.976012	2.16036e-14	1
ENSG00000085511	MAP3K4	protein_coding	Q9Y6R4	-0.277506	0.00976682	0.398001	0.00046652	0
ENSG00000085514	PILRA	protein_coding	Q9UKJ1	0.772561	0.315414	1.1934	0.137131	0
ENSG00000085552	IGSF9	protein_coding	Q9P2J2	1.12858	0.00131455	0.910802	0.00452953	0
ENSG00000085563	ABCB1	protein_coding	P08183	-0.775858	1.49448e-10	-0.528474	0.00014297	0
ENSG00000085644	ZNF213	protein_coding	O14771	0.743508	8.03131e-08	1.08905	1.29683e-16	0
ENSG00000085662	AKR1B1	protein_coding	P15121	0.0431871	0.749652	-0.796506	4.47485e-28	0
ENSG00000085719	CPNE3	protein_coding	O75131	-0.953618	1.00646e-27	-0.756251	2.27961e-05	0
ENSG00000085721	RRN3	protein_coding	Q9NYV6	-0.791422	7.62616e-07	-0.298574	0.103122	0
ENSG00000085733	CTTN	protein_coding	Q14247	-0.100486	0.240526	0.045062	0.743241	0
ENSG00000085741	WNT11	protein_coding	O96014	0.417964	0.101176	0.27952	0.214059	0
ENSG00000085760	MTIF2	protein_coding	P46199	-0.622806	1.41142e-13	-0.319503	0.000938716	1
ENSG00000085788	DDHD2	protein_coding	O94830	-0.202821	0.0851826	0.100394	0.425278	0
ENSG00000085831	TTC39A	protein_coding	Q5SRH9	0.694626	0.00012308	0.73271	1.01666e-05	0
ENSG00000085832	EPS15	protein_coding	P42566	-0.209066	0.0051765	-0.0826795	0.354705	0
ENSG00000085840	ORC1	protein_coding	Q13415	-0.0259747	0.838425	-0.465006	0.000807277	0
ENSG00000085871	MGST2	protein_coding	Q99735	1.00289	1.28311e-07	-1.14015	0.00295424	0
ENSG00000085872	CHERP	protein_coding	Q8IWX8	0.352053	0.0053337	0.0301247	0.763945	0
ENSG00000085978	ATG16L1	protein_coding	Q676U5	NA	NA	NA	NA	0
ENSG00000085982	USP40	protein_coding	Q9NVE5	0.22266	0.204315	0.898034	4.35201e-14	0
ENSG00000085998	POMGNT1	protein_coding	Q8WZA1	0.815878	3.19132e-16	1.03294	7.94136e-21	0
ENSG00000085999	RAD54L	protein_coding	Q92698	0.271644	0.0703395	0.964254	3.28073e-19	0
ENSG00000086015	MAST2	protein_coding	Q6P0Q8	0.844451	2.06451e-17	1.11213	4.81001e-25	0
ENSG00000086061	DNAJA1	protein_coding	P31689	-0.619329	2.96296e-09	-0.993694	4.65044e-11	0
ENSG00000086062	B4GALT1	protein_coding	P15291	0.314954	0.029584	0.0101088	0.962737	0
ENSG00000086065	CHMP5	protein_coding	Q9NZZ3	-0.496702	3.8346e-06	-1.1355	4.86409e-32	0
ENSG00000086102	NFX1	protein_coding	Q12986	-0.362245	6.48446e-05	0.142926	0.198224	0
ENSG00000086159	AQP6	protein_coding	Q13520	1.27815	0.0325728	1.34306	0.0130977	0
ENSG00000086189	DIMT1	protein_coding	Q9UNQ2	-0.728269	1.87847e-08	-0.93516	1.33834e-15	0
ENSG00000086200	IPO11	protein_coding	Q9UI26	-0.853245	3.94015e-35	-0.874682	4.18876e-28	0
ENSG00000086205	FOLH1	protein_coding	Q04609	-0.0593046	0.972431	-0.380768	0.769032	0
ENSG00000086232	EIF2AK1	protein_coding	Q9BQI3	0.0157319	0.864543	0.0705654	0.4391	0
ENSG00000086288	NME8	protein_coding	Q8N427	NA	NA	NA	NA	0
ENSG00000086289	EPDR1	protein_coding	Q9UM22	0.112608	0.754814	-0.286922	0.25023	0
ENSG00000086300	SNX10	protein_coding	Q9Y5X0	1.37912	2.22876e-49	0.790606	6.33103e-15	0
ENSG00000086475	SEPHS1	protein_coding	P49903	0.593375	2.36153e-05	-0.24352	0.10753	0
ENSG00000086504	MRPL28	protein_coding	Q13084	-0.0278147	0.888099	-0.537449	1.00082e-06	1
ENSG00000086506	HBQ1	protein_coding	P09105	-0.151703	0.703666	-0.145292	0.692107	0
ENSG00000086544	ITPKC	protein_coding	Q96DU7	0.500323	2.14867e-05	0.772011	2.2923e-11	0
ENSG00000086548	CEACAM6	protein_coding	P40199	NA	NA	NA	NA	0
ENSG00000086570	FAT2	protein_coding	Q9NYQ8	-0.701348	0.337887	0.630106	0.42174	0
ENSG00000086589	RBM22	protein_coding	Q9NW64	0.108843	0.355787	-0.534715	1.1365e-14	0
ENSG00000086598	TMED2	protein_coding	Q15363	-0.790084	1.38903e-12	-0.799813	3.11452e-07	0
ENSG00000086619	ERO1B	protein_coding	Q86YB8	0.216265	0.122951	0.276321	0.0416698	0
ENSG00000086666	ZFAND6	protein_coding	Q6FIF0	-0.914142	1.01952e-26	-1.1621	1.64547e-33	0
ENSG00000086696	HSD17B2	protein_coding	P37059	-1.47089	NA	NA	NA	0
ENSG00000086712	TXLNG	protein_coding	Q9NUQ3	0.173787	0.0171189	0.295696	0.00134577	0
ENSG00000086717	PPEF1	protein_coding	O14829	0.254674	0.715048	0.117855	0.874693	0
ENSG00000086730	LAT2	protein_coding	Q9GZY6	1.35115	1.86216e-09	1.78213	3.87844e-14	0
ENSG00000086758	HUWE1	protein_coding	Q7Z6Z7	0.22332	0.000207628	0.477511	1.52766e-06	0
ENSG00000086827	ZW10	protein_coding	O43264	-0.974013	5.97005e-23	-0.453843	0.000336887	0
ENSG00000086848	ALG9	protein_coding	Q9H6U8	0.136298	0.740344	0.671334	0.0273106	0
ENSG00000086967	MYBPC2	protein_coding	Q14324	1.9074	0.0446695	2.12702	0.0229068	0
ENSG00000086991	NOX4	protein_coding	Q9NPH5	2.28812	NA	2.79369	NA	0
ENSG00000087008	ACOX3	protein_coding	O15254	0.382782	0.000175886	0.261097	0.0261612	1
ENSG00000087053	MTMR2	protein_coding	Q13614	0.0141875	0.922228	0.22751	0.0228705	0
ENSG00000087074	PPP1R15A	protein_coding	O75807	1.0211	6.81655e-38	0.65823	6.31454e-09	0
ENSG00000087076	HSD17B14	protein_coding	Q9BPX1	0.516519	0.0534022	-0.0683999	0.817439	0
ENSG00000087077	TRIP6	protein_coding	Q15654	0.798787	2.8135e-25	0.352671	4.59325e-05	0
ENSG00000087085	ACHE	protein_coding	P22303	1.27386	7.25792e-15	0.931126	1.1565e-09	0
ENSG00000087086	FTL	protein_coding	P02792	0.348941	0.622441	-0.61064	0.450234	0
ENSG00000087087	SRRT	protein_coding	Q9BXP5	0.352519	6.89663e-08	0.256442	0.00346845	0
ENSG00000087088	BAX	protein_coding	Q07812	-0.00193823	0.993635	-0.458535	0.00202764	1
ENSG00000087095	NLK	protein_coding	Q9UBE8	0.0406574	0.898992	0.597931	0.00291673	0
ENSG00000087111	PIGS	protein_coding	Q96S52	0.470732	7.73806e-08	0.220705	0.024117	0
ENSG00000087116	ADAMTS2	protein_coding	O95450	0.682197	0.00348749	0.854692	3.44028e-05	0
ENSG00000087128	TMPRSS11E	protein_coding	Q9UL52	NA	NA	NA	NA	0
ENSG00000087152	ATXN7L3	protein_coding	Q14CW9	0.807927	1.53668e-18	1.25681	9.12089e-29	0
ENSG00000087157	PGS1	protein_coding	Q32NB8	0.786346	1.23115e-13	0.718604	2.38439e-09	1
ENSG00000087191	PSMC5	protein_coding	P62195	-0.494692	0.000302824	-0.797468	1.58475e-10	0
ENSG00000087206	UIMC1	protein_coding	Q96RL1	0.427859	0.00128821	0.256488	0.0780864	0
ENSG00000087237	CETP	protein_coding	P11597	0.453203	0.680153	2.36265	0.0197462	0
ENSG00000087245	MMP2	protein_coding	P08253	0.37383	0.261053	-0.475053	0.11567	0
ENSG00000087250	MT3	protein_coding	P25713	-0.154807	NA	NA	NA	0
ENSG00000087253	LPCAT2	protein_coding	Q7L5N7	-0.671422	4.92873e-06	-0.681743	8.05691e-06	0
ENSG00000087258	GNAO1	protein_coding	P09471	0.263901	0.417999	-0.147473	0.580586	0
ENSG00000087263	OGFOD1	protein_coding	Q8N543	-0.730345	1.23645e-20	-0.781811	4.24993e-25	0
ENSG00000087266	SH3BP2	protein_coding	P78314	1.27469	2.768e-24	1.43401	4.92999e-33	0
ENSG00000087269	NOP14	protein_coding	P78316	0.161955	0.293776	-0.447185	0.000345008	0
ENSG00000087274	ADD1	protein_coding	P35611	-0.00465911	0.970684	-0.130524	0.344616	0
ENSG00000087299	L2HGDH	protein_coding	Q9H9P8	-0.28761	0.00896619	-0.440662	0.000191908	1
ENSG00000087301	TXNDC16	protein_coding	Q9P2K2	-0.698928	9.63741e-09	-0.334923	0.0331978	0
ENSG00000087302	C14orf166	protein_coding	#N/A	-0.977631	5.58125e-25	-1.14777	1.65171e-22	0
ENSG00000087303	NID2	protein_coding	Q14112	-0.11354	0.499343	-0.509226	0.000315622	0
ENSG00000087338	GMCL1	protein_coding	Q96IK5	-0.205326	0.109337	0.385256	0.00677516	0
ENSG00000087365	SF3B2	protein_coding	Q13435	-0.223752	0.119153	-0.652146	3.12398e-12	0
ENSG00000087448	KLHL42	protein_coding	Q9P2K6	0.507793	1.07332e-05	0.886097	2.7209e-15	0
ENSG00000087460	GNAS	protein_coding	Q5JWF2	0.0312668	0.83099	-0.507369	1.29947e-05	0
ENSG00000087470	DNM1L	protein_coding	O00429	-0.968994	1.34597e-51	-0.614823	1.75184e-08	1
ENSG00000087494	PTHLH	protein_coding	P12272	0.0915982	0.906657	-0.502746	0.429727	0
ENSG00000087495	PHACTR3	protein_coding	Q96KR7	-0.0226334	0.975245	-0.356346	0.445568	0
ENSG00000087502	ERGIC2	protein_coding	Q96RQ1	-0.793103	4.14094e-06	-0.319314	0.0712512	0
ENSG00000087510	TFAP2C	protein_coding	Q92754	0.320083	0.188851	-0.241653	0.274209	0
ENSG00000087586	AURKA	protein_coding	O14965	-0.336104	0.00534278	-0.929749	2.5361e-13	0
ENSG00000087589	CASS4	protein_coding	Q9NQ75	0.438544	0.36055	1.39549	0.000716323	0
ENSG00000087842	PIR	protein_coding	O00625	-0.0723626	0.711082	-0.617027	2.03247e-05	0
ENSG00000087884	AAMDC	protein_coding	Q9H7C9	-0.797624	0.000646644	-1.10523	9.85477e-08	0
ENSG00000087903	RFX2	protein_coding	P48378	1.13684	1.50864e-15	0.977322	1.29775e-10	0
ENSG00000087995	METTL2A	protein_coding	Q96IZ6	-0.701398	8.07559e-08	-0.46572	0.000552062	0
ENSG00000088002	SULT2B1	protein_coding	O00204	0.127539	0.840991	-0.0685421	0.899268	0
ENSG00000088035	ALG6	protein_coding	Q9Y672	-0.665341	8.67916e-20	-0.632782	6.58055e-18	0
ENSG00000088038	CNOT3	protein_coding	O75175	0.645245	0.46214	0.467224	0.556166	0
ENSG00000088053	GP6	protein_coding	Q9HCN6	NA	NA	NA	NA	0
ENSG00000088179	PTPN4	protein_coding	P29074	0.165491	0.333507	0.643325	9.98857e-06	1
ENSG00000088205	DDX18	protein_coding	Q9NVP1	-1.10553	9.88599e-41	-0.694062	0.000730023	0
ENSG00000088247	KHSRP	protein_coding	Q92945	0.137943	0.239696	-0.226027	0.0068948	0
ENSG00000088256	GNA11	protein_coding	P29992	0.694831	8.5315e-07	0.661709	1.3674e-06	0
ENSG00000088280	ASAP3	protein_coding	Q8TDY4	NA	NA	NA	NA	0
ENSG00000088298	EDEM2	protein_coding	Q9BV94	0.110797	0.451863	0.0188807	0.91741	0
ENSG00000088305	DNMT3B	protein_coding	Q9UBC3	0.173382	0.0814879	0.205896	0.0940883	0
ENSG00000088320	REM1	protein_coding	O75628	0.999335	NA	0.434687	NA	0
ENSG00000088325	TPX2	protein_coding	Q9ULW0	-0.344499	1.16401e-05	-0.623435	0.0027581	0
ENSG00000088340	FER1L4	transcribed_unitary_pseudogene	A9Z1Z3	0.878919	0.00128821	1.77159	1.30687e-07	0
ENSG00000088356	PDRG1	protein_coding	Q9NUG6	-0.119013	0.348112	-0.830159	4.5042e-21	0
ENSG00000088367	EPB41L1	protein_coding	Q9H4G0	0.657011	2.72521e-08	0.813651	2.18449e-10	0
ENSG00000088386	SLC15A1	protein_coding	P46059	0.343228	0.739164	0.209783	0.814065	0
ENSG00000088387	DOCK9	protein_coding	Q9BZ29	0.0441463	0.717009	0.622103	5.2282e-12	0
ENSG00000088448	ANKRD10	protein_coding	Q9NXR5	0.417224	0.00821667	0.742782	1.49992e-06	0
ENSG00000088451	TGDS	protein_coding	O95455	-0.943762	5.34903e-21	-0.602867	1.61702e-09	0
ENSG00000088538	DOCK3	protein_coding	Q8IZD9	0.903975	1.42217e-10	1.46888	1.13319e-19	0
ENSG00000088543	C3orf18	protein_coding	Q9UK00	0.94718	0.000471687	1.21418	1.2364e-06	0
ENSG00000088682	COQ9	protein_coding	O75208	0.133993	0.228983	0.130044	0.277391	1
ENSG00000088726	TMEM40	protein_coding	Q8WWA1	-0.729979	NA	-1.46927	0.352228	0
ENSG00000088727	KIF9	protein_coding	Q9HAQ2	0.0142285	0.954836	-0.461404	0.00136446	0
ENSG00000088756	ARHGAP28	protein_coding	Q9P2N2	-0.510709	0.0905075	-0.587959	0.0557827	0
ENSG00000088766	CRLS1	protein_coding	Q9UJA2	-0.393123	0.000443598	0.0608053	0.655992	1
ENSG00000088782	DEFB127	protein_coding	Q9H1M4	NA	NA	NA	NA	0
ENSG00000088808	PPP1R13B	protein_coding	Q96KQ4	0.58983	7.27531e-06	0.65568	9.1205e-08	0
ENSG00000088812	ATRN	protein_coding	O75882	-0.359721	2.52046e-05	-0.158833	0.163905	0
ENSG00000088826	SMOX	protein_coding	Q9NWM0	0.888094	6.94221e-07	1.02442	7.87755e-10	0
ENSG00000088827	SIGLEC1	protein_coding	Q9BZZ2	3.47649	NA	2.84941	0.0857459	0
ENSG00000088832	FKBP1A	protein_coding	P62942	0.228946	0.0601252	-0.571282	1.92862e-09	0
ENSG00000088833	NSFL1C	protein_coding	Q9UNZ2	0.0251906	0.876644	-0.690294	3.01576e-13	0
ENSG00000088836	SLC4A11	protein_coding	Q8NBS3	0.851906	0.000113488	0.951419	9.3464e-08	0
ENSG00000088854	C20orf194	protein_coding	Q5TEA3	0.187612	0.181968	0.706875	2.57275e-08	0
ENSG00000088876	ZNF343	protein_coding	Q6P1L6	0.119682	0.689429	0.704825	1.22098e-05	0
ENSG00000088881	EBF4	protein_coding	Q9BQW3	1.41731	4.76709e-10	1.62429	1.48759e-12	0
ENSG00000088882	CPXM1	protein_coding	Q96SM3	0.429246	NA	2.05764	NA	0
ENSG00000088888	MAVS	protein_coding	Q7Z434	1.49274	1.22219e-52	4.14078	3.15584e-37	1
ENSG00000088899	LZTS3	protein_coding	O60299	1.00176	1.14506e-13	1.36982	7.76025e-21	0
ENSG00000088926	F11	protein_coding	P03951	1.64632	NA	1.55259	NA	0
ENSG00000088930	XRN2	protein_coding	Q9H0D6	-0.820805	3.14333e-21	-0.504656	0.0229557	0
ENSG00000088970	KIZ	protein_coding	Q2M2Z5	-0.547263	2.51147e-05	-0.534136	1.56634e-06	0
ENSG00000088986	DYNLL1	protein_coding	P63167	-0.478995	1.70558e-05	-0.710136	1.51901e-10	0
ENSG00000088992	TESC	protein_coding	Q96BS2	0.328315	0.153506	-0.114388	0.600293	0
ENSG00000089006	SNX5	protein_coding	Q9Y5X3	0.139789	0.0139741	-0.417691	4.58035e-13	0
ENSG00000089009	RPL6	protein_coding	Q02878	-1.17408	6.53374e-29	-1.48482	1.68087e-42	0
ENSG00000089012	SIRPG	protein_coding	Q9P1W8	-0.284958	NA	1.51178	NA	0
ENSG00000089022	MAPKAPK5	protein_coding	Q8IW41	0.373851	0.00930901	0.754491	2.78893e-07	0
ENSG00000089041	P2RX7	protein_coding	Q99572	1.09292	0.511474	0.835994	0.523856	0
ENSG00000089048	ESF1	protein_coding	Q9H501	-0.534855	3.82193e-16	-0.321209	0.0787543	0
ENSG00000089050	RBBP9	protein_coding	O75884	-0.702117	6.6692e-05	-0.507474	0.00398151	0
ENSG00000089053	ANAPC5	protein_coding	Q9UJX4	0.0865419	0.179839	-0.121977	0.06161	0
ENSG00000089057	SLC23A2	protein_coding	Q9UGH3	0.543679	1.57334e-06	0.64477	9.66016e-08	0
ENSG00000089060	SLC8B1	protein_coding	Q6J4K2	0.870624	4.43268e-08	0.965891	3.05338e-07	0
ENSG00000089063	TMEM230	protein_coding	Q96A57	-0.0826754	0.670725	-0.210509	0.118857	0
ENSG00000089091	DZANK1	protein_coding	Q9NVP4	0.421976	0.0784239	0.911188	3.06972e-05	0
ENSG00000089094	KDM2B	protein_coding	Q8NHM5	0.344971	1.95515e-05	0.604061	6.95112e-15	0
ENSG00000089101	CFAP61	protein_coding	Q8NHU2	0.191887	0.846467	0.801754	0.366433	0
ENSG00000089116	LHX5	protein_coding	Q9H2C1	0.422265	NA	1.51178	NA	0
ENSG00000089123	TASP1	protein_coding	Q9H6P5	0.245858	0.159881	0.704066	3.57038e-06	0
ENSG00000089127	OAS1	protein_coding	P00973	-0.154807	NA	0.357635	NA	0
ENSG00000089154	GCN1	protein_coding	Q92616	0.522968	7.64984e-08	0.790587	1.5958e-16	0
ENSG00000089157	RPLP0	protein_coding	P05388	0.231448	0.00510816	-0.0981215	0.313476	0
ENSG00000089159	PXN	protein_coding	P49023	0.520546	2.46826e-05	0.240739	0.152581	0
ENSG00000089163	SIRT4	protein_coding	Q9Y6E7	0.10042	0.836627	-0.71363	0.0119481	1
ENSG00000089169	RPH3A	protein_coding	Q9Y2J0	-1.14777	NA	0.357635	NA	0
ENSG00000089177	KIF16B	protein_coding	Q96L93	0.153967	0.282576	0.0537402	0.691945	0
ENSG00000089195	TRMT6	protein_coding	Q9UJA5	-0.645062	2.48129e-06	-0.585894	2.06863e-06	0
ENSG00000089199	CHGB	protein_coding	P05060	0.015858	0.983503	-0.504169	0.358353	0
ENSG00000089220	PEBP1	protein_coding	P30086	0.235795	0.0625507	-0.840388	1.1964e-17	0
ENSG00000089225	TBX5	protein_coding	Q99593	NA	NA	NA	NA	0
ENSG00000089234	BRAP	protein_coding	Q7Z569	-0.271218	0.00509558	-0.400339	4.08311e-07	0
ENSG00000089248	ERP29	protein_coding	P30040	0.0296168	0.883886	-0.787921	3.95354e-08	0
ENSG00000089250	NOS1	protein_coding	P29475	1.33974	NA	0.614746	NA	0
ENSG00000089280	FUS	protein_coding	P35637	-0.32191	0.00408057	-0.646749	3.63179e-05	0
ENSG00000089289	IGBP1	protein_coding	P78318	-0.270403	0.134799	-0.500283	2.60678e-05	0
ENSG00000089327	FXYD5	protein_coding	Q96DB9	0.357351	0.0916066	-1.18295	4.17785e-09	0
ENSG00000089335	ZNF302	protein_coding	Q9NR11	-0.832871	3.10021e-06	-0.673395	7.85892e-05	0
ENSG00000089351	GRAMD1A	protein_coding	Q96CP6	0.738495	8.05444e-12	1.0879	3.47451e-54	0
ENSG00000089356	FXYD3	protein_coding	Q14802	-0.764593	NA	0.934708	NA	0
ENSG00000089472	HEPH	protein_coding	Q9BQS7	0.999335	NA	0.934708	NA	0
ENSG00000089486	CDIP1	protein_coding	Q9H305	0.652953	0.0593895	0.54162	0.166697	0
ENSG00000089505	CMTM1	protein_coding	Q8IZ96	0.557983	0.327994	0.808747	0.14697	0
ENSG00000089558	KCNH4	protein_coding	Q9UQ05	1.17402	0.00221354	1.47057	9.61503e-05	0
ENSG00000089597	GANAB	protein_coding	Q14697	-0.0825455	0.494407	-0.24127	0.0721461	0
ENSG00000089639	GMIP	protein_coding	Q9P107	1.18035	2.14338e-08	1.21796	4.06227e-11	0
ENSG00000089682	RBM41	protein_coding	Q96IZ5	-0.0313115	0.887958	-0.477347	0.0456847	0
ENSG00000089685	BIRC5	protein_coding	O15392	-0.194829	0.0014714	-0.515771	4.35592e-08	0
ENSG00000089692	LAG3	protein_coding	P18627	0.756657	0.403097	2.49038	0.00943615	0
ENSG00000089693	MLF2	protein_coding	Q15773	0.0581035	0.651778	0.177193	0.0974647	0
ENSG00000089723	OTUB2	protein_coding	Q96DC9	-0.154807	NA	-0.142386	NA	0
ENSG00000089737	DDX24	protein_coding	Q9GZR7	0.885122	0.142694	-0.792328	0.326847	0
ENSG00000089775	ZBTB25	protein_coding	P24278	-0.0850889	0.667458	0.249816	0.0761916	0
ENSG00000089818	NECAP1	protein_coding	Q8NC96	-0.325064	0.00478276	-0.691127	2.81877e-14	0
ENSG00000089820	ARHGAP4	protein_coding	P98171	1.81076	5.64032e-12	2.23439	9.65444e-17	0
ENSG00000089847	ANKRD24	protein_coding	#N/A	1.39988	3.00641e-13	1.44693	2.94696e-16	0
ENSG00000089876	DHX32	protein_coding	Q7L7V1	-0.233797	0.0346447	0.40643	0.000442664	0
ENSG00000089902	RCOR1	protein_coding	Q9UKL0	-0.331759	0.000119049	-0.550515	6.27887e-07	0
ENSG00000089916	GPATCH2L	protein_coding	Q9NWQ4	-0.240676	0.175986	-0.236377	0.118401	0
ENSG00000090006	LTBP4	protein_coding	Q8N2S1	0.912528	6.84287e-15	0.89011	9.95825e-13	0
ENSG00000090013	BLVRB	protein_coding	P30043	0.286124	0.11483	-0.711338	4.59267e-09	0
ENSG00000090020	SLC9A1	protein_coding	P19634	0.909548	2.96544e-16	0.699303	1.38791e-09	0
ENSG00000090054	SPTLC1	protein_coding	O15269	-0.595619	9.26631e-18	-0.526156	2.74345e-08	0
ENSG00000090060	PAPOLA	protein_coding	P51003	-0.586219	3.22895e-10	0.0577024	0.566673	0
ENSG00000090061	CCNK	protein_coding	O75909	0.312652	0.0241297	-0.479624	0.00278157	0
ENSG00000090097	PCBP4	protein_coding	P57723	0.684533	0.00625442	0.27053	0.279022	0
ENSG00000090104	RGS1	protein_coding	Q08116	NA	NA	NA	NA	0
ENSG00000090238	YPEL3	protein_coding	P61236	0.195987	0.191985	-0.429103	0.00449024	0
ENSG00000090263	MRPS33	protein_coding	Q9Y291	-0.618252	9.81735e-09	-1.08424	1.88285e-33	1
ENSG00000090266	NDUFB2	protein_coding	O95178	-0.542652	9.76127e-06	-0.896927	8.58615e-16	1
ENSG00000090273	NUDC	protein_coding	Q9Y266	-0.222393	0.114414	-0.53389	2.84997e-07	0
ENSG00000090316	MAEA	protein_coding	Q7L5Y9	0.26661	0.0865426	-0.237863	0.0951077	0
ENSG00000090339	ICAM1	protein_coding	P05362	1.51274	0.115719	1.20285	0.150663	0
ENSG00000090372	STRN4	protein_coding	Q9NRL3	2.01385	5.52463e-63	1.40315	5.58973e-39	0
ENSG00000090376	IRAK3	protein_coding	Q9Y616	0.692228	0.654697	0.161064	0.888286	0
ENSG00000090382	LYZ	protein_coding	P61626	0.878332	NA	1.27881	NA	0
ENSG00000090402	SI	protein_coding	P14410	0.939875	NA	0.518331	NA	0
ENSG00000090432	MUL1	protein_coding	Q969V5	0.343306	0.00077453	-0.232143	0.159146	1
ENSG00000090447	TFAP4	protein_coding	Q01664	0.567687	2.96482e-05	0.169412	0.140317	0
ENSG00000090470	PDCD7	protein_coding	Q8N8D1	0.285013	0.0572189	0.32603	0.0165655	0
ENSG00000090487	SPG21	protein_coding	Q9NZD8	-0.155357	0.247867	-0.404536	0.00355399	0
ENSG00000090512	FETUB	protein_coding	Q9UGM5	NA	NA	0.357635	NA	0
ENSG00000090520	DNAJB11	protein_coding	Q9UBS4	-0.445553	0.000332652	-0.626293	6.19612e-09	0
ENSG00000090530	P3H2	protein_coding	Q8IVL5	0.099365	0.782978	-0.282492	0.368134	0
ENSG00000090534	THPO	protein_coding	P40225	-0.883418	0.486253	-0.258218	0.871643	0
ENSG00000090539	CHRD	protein_coding	Q9H2X0	1.27645	0.0021771	0.586151	0.162485	0
ENSG00000090554	FLT3LG	protein_coding	P49771	1.02764	0.177567	2.08	0.00584957	0
ENSG00000090565	RAB11FIP3	protein_coding	O75154	0.996923	0.180601	1.38081	0.0498272	0
ENSG00000090581	GNPTG	protein_coding	Q9UJJ9	0.638622	5.69285e-06	0.0353621	0.861765	0
ENSG00000090612	ZNF268	protein_coding	Q14587	-0.664048	0.00140773	-0.0129104	0.962266	0
ENSG00000090615	GOLGA3	protein_coding	Q08378	1.03724	8.96753e-32	1.34582	1.55457e-37	0
ENSG00000090621	PABPC4	protein_coding	Q13310	-0.169251	0.131776	0.0167984	0.948852	0
ENSG00000090659	CD209	protein_coding	Q9NNX6	-0.0759748	0.897647	-0.463839	0.222906	0
ENSG00000090661	CERS4	protein_coding	Q9HA82	0.679309	9.75236e-07	0.364819	0.00866555	0
ENSG00000090674	MCOLN1	protein_coding	Q9GZU1	0.915088	2.11067e-19	0.449176	8.25413e-06	0
ENSG00000090686	USP48	protein_coding	Q86UV5	-0.298338	0.000395593	-0.222419	0.0244891	0
ENSG00000090776	EFNB1	protein_coding	P98172	0.221691	0.263485	0.129478	0.450118	0
ENSG00000090857	PDPR	protein_coding	Q8NCN5	0.26257	0.0838835	0.393833	0.00155834	1
ENSG00000090861	AARS	protein_coding	P49588	0.255611	0.0308553	-0.189537	0.15941	0
ENSG00000090863	GLG1	protein_coding	Q92896	-0.199424	0.0504358	-0.371273	1.68475e-05	0
ENSG00000090889	KIF4A	protein_coding	O95239	-0.566438	2.54466e-12	-0.729298	0.000650355	0
ENSG00000090905	TNRC6A	protein_coding	Q8NDV7	0.112792	0.334101	0.54795	2.35105e-05	0
ENSG00000090924	PLEKHG2	protein_coding	Q9H7P9	0.750501	5.39199e-13	1.01834	2.3668e-26	0
ENSG00000090932	DLL3	protein_coding	Q9NYJ7	-0.24091	0.408368	-0.147553	0.610107	0
ENSG00000090971	NAT14	protein_coding	Q8WUY8	0.879744	3.93167e-11	0.732019	5.11458e-08	0
ENSG00000090975	PITPNM2	protein_coding	Q9BZ72	1.11623	3.41301e-16	1.36214	4.99626e-22	0
ENSG00000090989	EXOC1	protein_coding	Q9NV70	-0.703828	2.45467e-10	-0.465534	0.0135744	0
ENSG00000091009	RBM27	protein_coding	Q9P2N5	-0.423511	0.00797234	0.146465	0.371064	0
ENSG00000091010	POU4F3	protein_coding	Q15319	0.790127	NA	0.48311	0.798546	0
ENSG00000091039	OSBPL8	protein_coding	Q9BZF1	-0.659561	3.24668e-17	-0.419231	4.84112e-06	0
ENSG00000091073	DTX2	protein_coding	Q86UW9	0.612144	0.148213	0.849521	0.0321819	0
ENSG00000091106	NLRC4	protein_coding	Q9NPP4	0.0590961	0.923429	1.19505	0.0216417	0
ENSG00000091127	PUS7	protein_coding	Q96PZ0	-0.183915	0.0937394	-0.00910217	0.948437	0
ENSG00000091128	LAMB4	protein_coding	A4D0S4	-1.51815	0.377534	-0.219215	0.918417	0
ENSG00000091129	NRCAM	protein_coding	Q92823	-0.0122443	0.953619	-0.20794	0.290956	0
ENSG00000091136	LAMB1	protein_coding	P07942	-0.124488	0.236959	-0.236908	0.0862113	0
ENSG00000091137	SLC26A4	protein_coding	O43511	-0.0629372	0.952462	0.251449	0.757393	0
ENSG00000091138	SLC26A3	protein_coding	P40879	0.0850389	NA	0.906324	NA	0
ENSG00000091140	DLD	protein_coding	P09622	-0.851478	2.5759e-41	-0.881534	1.3893e-12	1
ENSG00000091157	WDR7	protein_coding	Q9Y4E6	-0.552278	6.19432e-05	-0.405679	0.029795	0
ENSG00000091164	TXNL1	protein_coding	O43396	-0.714562	1.26748e-12	-0.904482	2.52315e-19	0
ENSG00000091181	IL5RA	protein_coding	Q01344	-3.68217	0.0128987	-3.30989	0.0496762	0
ENSG00000091262	ABCC6	protein_coding	O95255	-0.0191072	NA	-0.0471419	NA	0
ENSG00000091317	CMTM6	protein_coding	Q9NX76	-0.906802	1.31485e-13	-0.635202	1.65854e-06	0
ENSG00000091409	ITGA6	protein_coding	P23229	-0.521937	0.00314584	-0.371605	0.0101409	0
ENSG00000091428	RAPGEF4	protein_coding	Q8WZA2	-0.261656	0.258338	0.0775242	0.742299	0
ENSG00000091436	AC013461.1	protein_coding	#N/A	-0.730346	8.99965e-13	-0.610105	8.67894e-07	0
ENSG00000091482	SMPX	protein_coding	Q9UHP9	1.4687	NA	1.10404	NA	0
ENSG00000091483	FH	protein_coding	P07954	-0.492877	3.65579e-08	-0.806118	2.01339e-14	1
ENSG00000091490	SEL1L3	protein_coding	Q68CR1	0.0651852	0.821196	0.344945	0.053412	0
ENSG00000091513	TF	protein_coding	P02787	1.23292	0.150034	2.42744	0.0134574	0
ENSG00000091527	CDV3	protein_coding	Q9UKY7	-0.504469	4.49185e-06	-0.324174	0.0501409	0
ENSG00000091536	MYO15A	protein_coding	Q9UKN7	1.00055	0.00741533	1.40939	0.000261684	0
ENSG00000091542	ALKBH5	protein_coding	Q6P6C2	0.0816171	0.554662	0.271245	0.0115201	0
ENSG00000091583	APOH	protein_coding	P02749	NA	NA	NA	NA	0
ENSG00000091592	NLRP1	protein_coding	Q9C000	0.64369	0.00107304	0.144786	0.480045	0
ENSG00000091622	PITPNM3	protein_coding	Q9BZ71	1.16476	0.000636337	1.64951	2.57254e-08	0
ENSG00000091640	SPAG7	protein_coding	O75391	-0.121989	0.493314	-0.516834	3.79208e-06	0
ENSG00000091651	ORC6	protein_coding	Q9Y5N6	-0.103085	0.499399	-0.846949	1.78256e-12	0
ENSG00000091656	ZFHX4	protein_coding	Q86UP3	-0.0303951	0.90935	0.121612	0.456988	0
ENSG00000091664	SLC17A6	protein_coding	Q9P2U8	NA	NA	NA	NA	0
ENSG00000091704	CPA1	protein_coding	P15085	-0.525065	NA	0.228998	NA	0
ENSG00000091732	ZC3HC1	protein_coding	Q86WB0	0.223042	0.0437902	0.344373	0.00061489	0
ENSG00000091831	ESR1	protein_coding	P03372	0.386675	NA	0.467613	0.817515	0
ENSG00000091844	RGS17	protein_coding	Q9UGC6	0.115631	0.737104	0.469632	0.0614608	0
ENSG00000091879	ANGPT2	protein_coding	O15123	-2.0401	0.103073	-1.49145	0.258566	0
ENSG00000091947	TMEM101	protein_coding	Q96IK0	-0.0760675	0.569859	-0.195785	0.218505	0
ENSG00000091972	CD200	protein_coding	P41217	-0.154807	NA	0.357635	NA	0
ENSG00000091986	CCDC80	protein_coding	Q76M96	-0.0469043	0.892626	-0.321236	0.129308	0
ENSG00000092009	CMA1	protein_coding	P23946	1.83312	NA	0.977518	0.643896	0
ENSG00000092010	PSME1	protein_coding	Q06323	-0.567135	6.86326e-10	-1.24797	3.25853e-36	0
ENSG00000092020	PPP2R3C	protein_coding	Q969Q6	-0.480144	0.000669834	-0.619494	3.43714e-06	0
ENSG00000092036	HAUS4	protein_coding	Q9H6D7	-0.41092	0.0200443	-1.04389	4.59362e-11	0
ENSG00000092051	JPH4	protein_coding	Q96JJ6	-0.723016	0.364465	1.1503	0.178124	0
ENSG00000092054	MYH7	protein_coding	P12883	0.140093	NA	-0.0984951	NA	0
ENSG00000092067	CEBPE	protein_coding	Q15744	1.50442	NA	2.01946	NA	0
ENSG00000092068	SLC7A8	protein_coding	Q9UHI5	-0.14667	0.44428	-0.132198	0.415744	0
ENSG00000092094	OSGEP	protein_coding	Q9NPF4	0.233796	0.0182134	0.140836	0.160974	0
ENSG00000092096	SLC22A17.1	protein_coding	#N/A	0.608324	0.104682	1.03734	0.000973671	0
ENSG00000092098	RNF31	protein_coding	Q96EP0	0.433277	0.00370606	0.689495	3.76497e-06	0
ENSG00000092108	SCFD1	protein_coding	Q8WVM8	-0.638719	1.60304e-14	-0.435007	0.00294094	0
ENSG00000092140	G2E3	protein_coding	Q7L622	-0.866101	5.10648e-17	-0.255571	0.17981	0
ENSG00000092148	HECTD1	protein_coding	Q9ULT8	-0.413795	1.78801e-12	0.077969	0.63726	0
ENSG00000092199	HNRNPC	protein_coding	P07910	0.687577	5.67804e-11	-0.451954	0.000338681	0
ENSG00000092200	RPGRIP1	protein_coding	Q96KN7	0.164994	0.786487	1.37535	0.0312619	0
ENSG00000092201	SUPT16H	protein_coding	Q9Y5B9	-0.926371	4.59434e-26	-0.520947	0.032687	0
ENSG00000092203	TOX4	protein_coding	O94842	-0.571151	4.23132e-08	-0.856561	1.46808e-20	0
ENSG00000092208	GEMIN2	protein_coding	O14893	-0.847652	3.87492e-12	-0.908828	1.79165e-13	0
ENSG00000092295	TGM1	protein_coding	P22735	1.31168	6.32985e-06	2.02081	2.10588e-13	0
ENSG00000092330	TINF2	protein_coding	Q9BSI4	0.442335	0.00430001	0.310754	0.0484972	0
ENSG00000092345	DAZL	protein_coding	Q92904	NA	NA	NA	NA	0
ENSG00000092377	TBL1Y	protein_coding	Q9BQ87	0.0213551	NA	0.901799	0.603224	0
ENSG00000092421	SEMA6A	protein_coding	Q9H2E6	0.117275	0.354127	0.260562	0.026989	0
ENSG00000092439	TRPM7	protein_coding	Q96QT4	-0.147472	0.121122	0.427452	2.70191e-07	0
ENSG00000092445	TYRO3	protein_coding	Q06418	0.917072	2.99719e-10	0.802225	1.02629e-07	0
ENSG00000092470	WDR76	protein_coding	Q9H967	-0.586873	9.8072e-09	-0.487195	1.94037e-07	0
ENSG00000092529	CAPN3	protein_coding	P20807	-0.0160105	0.994292	1.08662	0.453366	0
ENSG00000092531	SNAP23	protein_coding	O00161	-0.650643	6.59274e-07	-0.873736	4.63925e-13	0
ENSG00000092607	TBX15	protein_coding	Q96SF7	-0.757768	0.574457	0.483746	0.790561	0
ENSG00000092621	PHGDH	protein_coding	O43175	-0.0383409	0.834155	-0.849865	6.92715e-12	0
ENSG00000092758	COL9A3	protein_coding	Q14050	0.487107	0.286056	0.16307	0.685878	0
ENSG00000092820	EZR	protein_coding	P15311	-0.433953	2.96482e-05	-0.627821	0.00468154	0
ENSG00000092841	MYL6	protein_coding	P60660	-0.098454	0.305238	-0.925017	2.40074e-10	0
ENSG00000092847	AGO1	protein_coding	Q9UL18	0.631408	5.31352e-07	0.629408	1.63451e-06	0
ENSG00000092850	TEKT2	protein_coding	Q9UIF3	0.115095	0.82278	0.48023	0.182915	0
ENSG00000092853	CLSPN	protein_coding	Q9HAW4	-0.327929	3.6912e-06	-0.600459	0.000522209	0
ENSG00000092871	RFFL	protein_coding	Q8WZ73	0.126041	0.734739	0.422141	0.068799	0
ENSG00000092929	UNC13D	protein_coding	Q70J99	1.13702	0.00762826	2.09777	7.07692e-06	0
ENSG00000092931	MFSD11	protein_coding	O43934	-0.0178347	0.902472	-0.190169	0.0632808	0
ENSG00000092964	DPYSL2	protein_coding	Q16555	0.217806	0.00783565	-0.257628	0.0263012	0
ENSG00000092969	TGFB2	protein_coding	P61812	0.83316	0.0121916	0.931405	0.00146801	0
ENSG00000092978	GPATCH2	protein_coding	Q9NW75	-0.653085	1.14495e-10	-0.583668	3.46679e-11	0
ENSG00000093000	NUP50	protein_coding	Q9UKX7	-0.154791	0.265763	0.201611	0.0747367	0
ENSG00000093009	CDC45	protein_coding	O75419	0.168775	0.0779786	-0.317762	2.73264e-05	0
ENSG00000093010	COMT	protein_coding	P21964	0.288688	0.0263478	0.0250367	0.843389	1
ENSG00000093072	CECR1	protein_coding	#N/A	0.165361	0.909874	0.342302	0.784734	0
ENSG00000093100	XXbac-B461K10.4	processed_transcript	#N/A	-0.260966	0.855816	0.897443	0.522045	0
ENSG00000093134	VNN3	protein_coding	Q9NY84	NA	NA	NA	NA	0
ENSG00000093144	ECHDC1	protein_coding	Q9NTX5	-0.876722	4.79827e-22	-0.890888	7.48711e-22	1
[truncated: 55,993 more rows]

## Sheet: Counts data
				OMM Enrich Counts					OMM Input Counts					NES Enrich Counts
Ensemble Gene ID	Gene name	Gene type	UniprotID	Replicate 1	Replicate 2	Replicate 3	Replicate 4	Replicate 5	Replicate 1	Replicate 2	Replicate 3	Replicate 4	Replicate 5	Replicate 1	Replicate 2	Replicate 3	Replicate 4	Replicate 5
ENSG00000000003	TSPAN6	protein_coding	O43657	533	805	340	986	1041	1447	1391	1947	2586	3442	2172	3932	2107	3000	2727
ENSG00000000005	TNMD	protein_coding	Q9H2S6	0	4	4	7	8	13	4	7	13	13	4	8	4	12	6
ENSG00000000419	DPM1	protein_coding	O60762	537	922	344	1138	1201	1238	1236	1830	2823	3573	2022	3893	2026	2914	2890
ENSG00000000457	SCYL3	protein_coding	Q8IZE3	120	168	65	217	219	163	160	233	348	432	267	468	234	414	320
ENSG00000000460	C1orf112	protein_coding	#N/A	343	636	246	762	908	757	690	993	1479	1853	904	1789	1046	1360	1412
ENSG00000000938	FGR	protein_coding	P09769	0	0	2	2	0	0	1	0	0	0	0	0	1	0	0
ENSG00000000971	CFH	protein_coding	P08603	0	6	1	0	5	3	5	3	6	4	7	8	1	6	7
ENSG00000001036	FUCA2	protein_coding	Q9BTY2	345	474	165	548	550	543	531	869	1139	1518	631	1274	917	1301	1192
ENSG00000001084	GCLC	protein_coding	P48506	300	383	171	485	554	335	423	528	782	982	515	901	573	793	746
ENSG00000001167	NFYA	protein_coding	P23511	165	243	119	376	470	315	353	498	757	925	566	999	567	848	882
ENSG00000001460	STPG1	protein_coding	Q5TH74	92	139	65	153	211	152	177	280	296	429	259	437	223	298	274
ENSG00000001461	NIPAL3	protein_coding	Q6P499	231	398	145	657	906	183	226	356	409	491	475	793	382	493	415
ENSG00000001497	LAS1L	protein_coding	Q9Y4W2	1372	1991	870	2834	3001	1739	1827	2351	4078	5249	3289	5953	3917	5527	5146
ENSG00000001561	ENPP4	protein_coding	Q9Y6X5	143	213	114	299	332	356	402	573	715	1061	463	859	664	953	847
ENSG00000001617	SEMA3F	protein_coding	Q13275	80	150	59	156	224	58	75	97	153	156	109	203	103	148	128
ENSG00000001626	CFTR	protein_coding	P13569	1	1	2	0	2	0	2	0	1	0	0	0	1	0	0
ENSG00000001629	ANKIB1	protein_coding	Q9P2G1	254	349	115	553	678	191	182	328	400	509	247	665	248	346	332
ENSG00000001630	CYP51A1	protein_coding	Q16850	34	63	27	88	107	41	25	54	69	160	120	187	164	187	151
ENSG00000001631	KRIT1	protein_coding	O00522	119	180	97	226	252	249	225	344	507	691	199	392	330	439	378
ENSG00000002016	RAD52	protein_coding	P43351	388	506	241	589	665	264	266	412	418	531	269	608	346	508	450
ENSG00000002079	MYH16	unitary_pseudogene	Q9H6N6	20	20	7	29	38	8	8	15	19	32	20	28	7	11	16
ENSG00000002330	BAD	protein_coding	Q92934	71	137	49	158	185	102	91	111	201	260	149	342	168	310	264
ENSG00000002549	LAP3	protein_coding	P28838	617	1016	420	1060	1231	973	942	1370	2179	2931	1750	3115	2438	3596	3513
ENSG00000002586	CD99	protein_coding	P14209	656	1004	382	1372	1333	668	758	988	1494	1786	1635	2926	1827	2613	2480
ENSG00000002587	HS3ST1	protein_coding	O14792	0	0	0	1	0	0	0	0	0	0	0	0	2	1	1
ENSG00000002726	AOC1	protein_coding	P19801	0	0	0	0	0	0	0	1	0	0	0	1	0	0	2
ENSG00000002745	WNT16	protein_coding	Q9UBV4	1	1	0	2	3	1	0	1	1	4	2	2	0	1	0
ENSG00000002746	HECW1	protein_coding	Q76N89	2	7	0	2	12	1	2	3	9	11	10	8	4	7	9
ENSG00000002822	MAD1L1	protein_coding	Q9Y6D9	603	846	302	1021	1104	462	439	565	947	1099	696	1351	811	1169	1046
ENSG00000002834	LASP1	protein_coding	Q14847	249	409	170	526	565	332	379	459	703	960	811	1242	835	1211	1145
ENSG00000002919	SNX11	protein_coding	Q9Y5W9	291	372	150	406	546	188	167	315	366	506	399	695	361	503	487
ENSG00000002933	TMEM176A	protein_coding	Q96HP8	0	0	0	0	0	0	0	0	0	0	0	0	0	0	0
ENSG00000003056	M6PR	protein_coding	P20645	1013	1786	496	1284	1483	1012	1071	1273	1823	2088	2499	4638	1999	2537	2325
ENSG00000003096	KLHL13	protein_coding	Q9P2N7	172	322	122	369	368	327	400	545	731	877	520	919	601	894	823
ENSG00000003137	CYP26B1	protein_coding	Q9NR63	55	90	27	85	118	42	39	68	55	100	83	128	68	91	59
ENSG00000003147	ICA1	protein_coding	Q05084	33	40	19	49	101	53	56	59	89	110	71	154	84	121	111
ENSG00000003249	DBNDD1	protein_coding	Q9H9R9	98	126	44	159	206	68	97	113	173	180	94	191	79	134	105
ENSG00000003393	ALS2	protein_coding	Q96Q42	256	412	168	524	727	309	341	465	619	839	369	789	507	603	582
ENSG00000003400	CASP10	protein_coding	Q92851	48	74	23	64	81	84	82	132	150	227	163	223	157	216	213
ENSG00000003402	CFLAR	protein_coding	O15519	155	220	91	248	312	129	141	190	251	331	236	443	217	316	291
ENSG00000003436	TFPI	protein_coding	P10646	37	44	12	56	75	68	86	103	125	170	86	157	117	189	196
ENSG00000003509	NDUFAF7	protein_coding	Q7L592	116	189	71	251	231	150	174	210	312	434	306	468	237	376	400
ENSG00000003756	RBM5	protein_coding	P52756	851	1328	561	1867	2171	764	845	1348	1589	1853	904	1583	1260	1711	1833
ENSG00000003987	MTMR7	protein_coding	Q9Y216	21	58	18	51	58	30	37	44	53	77	81	142	73	72	100
ENSG00000003989	SLC7A2	protein_coding	P52569	285	418	131	587	589	355	321	535	923	1106	537	957	590	829	814
ENSG00000004059	ARF5	protein_coding	P84085	1264	1837	939	2536	2943	2022	2019	3505	4882	6359	4483	9290	5807	7797	7895
ENSG00000004139	SARM1	protein_coding	Q6SZW1	268	434	140	447	651	74	94	116	201	276	218	425	224	370	290
ENSG00000004142	POLDIP2	protein_coding	Q9Y2S7	832	1140	522	1237	1478	1008	1031	1499	1859	2457	1615	3142	2198	3122	3032
ENSG00000004399	PLXND1	protein_coding	Q9Y4D7	175	211	83	255	330	77	99	134	148	213	100	211	119	163	154
ENSG00000004455	AK2	protein_coding	P54819	701	1207	433	1251	1491	912	1033	1445	1946	2485	1702	3306	1788	2576	2540
ENSG00000004468	CD38	protein_coding	P28907	0	0	1	1	0	0	0	0	1	0	2	1	1	1	3
ENSG00000004478	FKBP4	protein_coding	Q02790	2120	3608	1392	3746	4192	2553	2643	3614	6476	7651	5616	10078	6671	8943	8696
ENSG00000004487	KDM1A	protein_coding	O60341	1756	3038	1093	3370	4053	2388	2770	3638	6000	7090	4099	7130	5048	7250	7126
ENSG00000004534	RBM6	protein_coding	P78332	919	1531	554	1718	1947	893	1036	1556	1875	2256	1058	2235	1513	2148	2196
ENSG00000004660	CAMKK1	protein_coding	Q8N5S9	255	329	149	489	588	195	231	291	438	479	253	506	272	440	371
ENSG00000004700	RECQL	protein_coding	P46063	393	621	250	743	934	934	840	1371	1850	2103	898	1577	1312	1721	1870
ENSG00000004766	VPS50	protein_coding	Q96JG6	183	322	104	410	494	404	432	625	995	1248	799	1152	820	1002	1053
ENSG00000004776	HSPB6	protein_coding	O14558	14	13	10	25	24	5	10	4	21	23	11	22	17	19	12
ENSG00000004777	ARHGAP33	protein_coding	O14559	39	42	18	55	94	26	20	28	26	52	22	43	45	65	40
ENSG00000004779	NDUFAB1	protein_coding	O14561	2723	4637	1553	5310	6153	3771	3505	4847	9150	11409	10853	19545	13092	16416	16195
ENSG00000004799	PDK4	protein_coding	Q16654	9	36	6	14	16	24	23	48	41	63	17	42	36	54	36
ENSG00000004809	SLC22A16	protein_coding	Q86VW1	0	0	0	0	0	0	0	0	2	2	0	0	0	1	1
ENSG00000004838	ZMYND10	protein_coding	O75800	22	22	10	34	59	12	13	11	33	29	9	30	9	14	18
ENSG00000004846	ABCB5	protein_coding	Q2M3G0	0	1	0	0	0	0	0	0	0	2	2	0	0	2	0
ENSG00000004848	ARX	protein_coding	Q96QS3	5	0	1	2	5	0	1	1	5	3	0	2	0	0	2
ENSG00000004864	SLC25A13	protein_coding	Q9UJS0	1079	1657	594	1772	1979	1658	1690	2225	3835	4540	2447	4235	3672	5054	5036
ENSG00000004866	ST7	protein_coding	Q9NRC1	112	160	51	196	267	79	92	141	186	227	137	273	123	196	176
ENSG00000004897	CDC27	protein_coding	P30260	677	1056	395	1056	1420	725	672	1151	1130	1473	947	1814	1169	1485	1567
ENSG00000004939	SLC4A1	protein_coding	P02730	6	4	3	4	7	1	1	4	1	5	2	2	4	4	1
ENSG00000004948	CALCR	protein_coding	P30988	0	0	0	0	1	0	1	0	1	3	0	0	3	1	1
ENSG00000004961	HCCS	protein_coding	P53701	207	286	113	473	580	430	479	585	1049	1221	987	1567	895	1231	1316
ENSG00000004975	DVL2	protein_coding	O14641	687	971	426	891	1252	604	630	953	1221	1449	791	1448	1049	1380	1348
ENSG00000005001	PRSS22	protein_coding	Q9GZN4	0	0	0	0	0	0	0	0	0	0	0	0	0	0	0
ENSG00000005007	UPF1	protein_coding	Q92900	2289	3730	1701	6250	7782	2294	2451	3525	6167	6978	6692	8722	6899	9159	9393
ENSG00000005020	SKAP2	protein_coding	O75563	446	688	217	690	837	538	514	616	939	1241	752	1478	1274	1534	1466
ENSG00000005022	SLC25A5	protein_coding	P05141	3619	5653	1872	8628	9470	5797	5487	7519	15841	21361	15411	26542	19084	25134	25634
ENSG00000005059	MCUB	protein_coding	Q9NWR8	79	169	69	166	218	113	117	179	206	252	226	579	305	359	348
ENSG00000005073	HOXA11	protein_coding	P31270	178	292	122	348	459	262	332	458	503	557	329	565	267	425	383
ENSG00000005075	POLR2J	protein_coding	P52435	42	78	30	93	77	47	33	70	99	117	83	160	93	124	114
ENSG00000005100	DHX33	protein_coding	Q9H6R0	994	1470	578	1537	1923	841	930	1292	1741	2143	1656	3291	2000	2672	2522
ENSG00000005102	MEOX1	protein_coding	P50221	9	9	7	8	18	8	3	12	10	17	11	33	16	20	19
ENSG00000005108	THSD7A	protein_coding	Q9UPZ6	12	11	4	10	12	5	6	12	6	20	8	13	12	14	8
ENSG00000005156	LIG3	protein_coding	P49916	421	679	288	1029	1280	511	562	781	1266	1740	880	1351	1607	2147	2046
ENSG00000005175	RPAP3	protein_coding	Q9H6T3	631	915	424	1084	1283	1560	1442	2169	3420	4238	1981	3586	2696	3529	3616
ENSG00000005187	ACSM3	protein_coding	Q53FZ2	13	13	7	21	26	12	24	22	31	69	13	49	35	35	49
ENSG00000005189	AC004381.6	protein_coding	#N/A	230	340	148	367	507	298	313	495	522	690	362	700	402	625	554
ENSG00000005194	CIAPIN1	protein_coding	Q6FI81	525	758	297	645	843	639	756	848	1343	1839	1202	2429	1399	1873	1887
ENSG00000005206	SPPL2B	protein_coding	Q8TCT7	253	369	149	496	682	96	122	160	229	268	180	347	160	234	197
ENSG00000005238	FAM214B	protein_coding	Q7L5A3	29	28	12	19	37	13	8	21	25	20	17	49	22	31	17
ENSG00000005243	COPZ2	protein_coding	Q9P299	13	16	5	8	10	4	4	11	9	14	6	16	1	12	8
ENSG00000005249	PRKAR2B	protein_coding	P31323	89	150	58	168	196	187	178	239	338	451	251	436	264	375	376
ENSG00000005302	MSL3	protein_coding	Q8N5Y2	225	301	129	710	834	362	365	474	711	837	639	1099	631	994	975
ENSG00000005339	CREBBP	protein_coding	Q92793	1761	2764	1228	2863	3680	1702	2042	2898	3335	4133	2886	5702	2985	3634	3546
ENSG00000005379	TSPOAP1	protein_coding	O95153	2	4	0	2	6	1	2	0	2	5	0	0	3	3	1
ENSG00000005381	MPO	protein_coding	P05164	0	1	0	0	2	0	0	0	0	1	0	0	0	0	0
ENSG00000005421	PON1	protein_coding	P27169	0	2	0	2	0	0	0	2	1	1	0	0	0	0	0
ENSG00000005436	GCFC2	protein_coding	P16383	298	469	196	612	672	477	522	768	880	1080	571	1085	703	950	1036
ENSG00000005448	WDR54	protein_coding	Q9H977	145	277	117	277	302	202	167	307	394	536	375	712	416	599	603
ENSG00000005469	CROT	protein_coding	Q9UKG9	60	100	42	164	136	114	148	195	331	383	177	280	253	323	348
ENSG00000005471	ABCB4	protein_coding	P21439	14	18	9	25	17	14	19	17	21	37	18	38	27	47	32
ENSG00000005483	KMT2E	protein_coding	Q8IZD2	308	433	210	620	659	360	387	647	627	737	429	900	336	533	432
ENSG00000005486	RHBDD2	protein_coding	Q6NTF9	136	213	83	200	271	118	126	204	186	256	183	442	162	307	257
ENSG00000005513	SOX8	protein_coding	P57073	44	46	29	85	84	19	32	29	57	89	44	64	33	68	46
ENSG00000005700	IBTK	protein_coding	Q9P2D0	0	3	0	1	0	2	1	3	2	4	3	4	0	6	1
ENSG00000005801	ZNF195	protein_coding	O14628	246	422	203	530	697	431	404	555	901	1096	741	1496	789	1073	1022
ENSG00000005810	MYCBP2	protein_coding	O75592	1836	2613	1057	3202	4115	1728	1971	2883	3865	4700	1638	3754	2134	2985	2829
ENSG00000005812	FBXL3	protein_coding	Q9UKT7	299	499	248	655	705	624	715	1049	1510	1719	827	1709	983	1343	1308
ENSG00000005844	ITGAL	protein_coding	P20701	2	7	3	1	3	3	2	5	5	4	1	4	2	1	6
ENSG00000005882	PDK2	protein_coding	Q15119	79	122	52	184	159	107	107	168	285	357	191	379	241	400	396
ENSG00000005884	ITGA3	protein_coding	P26006	92	152	51	138	199	78	89	140	126	162	112	183	100	151	146
ENSG00000005889	ZFX	protein_coding	P17010	505	754	360	1069	1360	959	1106	1638	2236	2647	1280	2329	1477	2121	1934
ENSG00000005893	LAMP2	protein_coding	P13473	1883	3062	1250	3616	4021	4175	3856	5303	7671	9005	6476	11576	8954	11752	11679
ENSG00000005961	ITGA2B	protein_coding	P08514	32	63	20	73	82	37	47	47	58	76	40	88	53	77	96
ENSG00000005981	ASB4	protein_coding	Q9Y574	0	0	0	0	0	0	0	0	0	0	0	0	0	0	0
ENSG00000006007	GDE1	protein_coding	Q9NZC3	282	421	175	518	599	325	347	558	667	871	599	1307	619	923	896
ENSG00000006015	C19orf60	protein_coding	#N/A	93	150	61	175	231	62	75	77	123	178	112	271	95	156	164
ENSG00000006016	CRLF1	protein_coding	O75462	8	25	6	14	17	7	12	18	13	16	17	41	14	31	27
ENSG00000006025	OSBPL7	protein_coding	Q9BZF2	43	68	21	51	76	21	38	39	46	50	19	55	37	67	57
ENSG00000006042	TMEM98	protein_coding	Q9Y2Y6	185	256	106	402	374	171	187	309	444	527	422	813	383	532	492
ENSG00000006047	YBX2	protein_coding	Q9Y2T7	14	12	4	14	22	8	6	9	6	23	18	19	12	16	31
ENSG00000006059	KRT33A	protein_coding	O76009	0	0	0	0	0	0	0	0	0	0	0	0	0	0	0
ENSG00000006062	MAP3K14	protein_coding	Q99558	101	156	84	160	188	69	83	148	117	115	85	200	73	138	119
ENSG00000006071	ABCC8	protein_coding	Q09428	38	55	14	58	56	13	11	27	18	42	24	77	19	27	34
ENSG00000006116	CACNG3	protein_coding	O60359	0	0	0	0	0	0	0	0	0	0	0	0	0	0	0
ENSG00000006118	TMEM132A	protein_coding	Q24JP5	257	391	174	395	496	169	141	231	294	349	291	574	305	415	369
ENSG00000006125	AP2B1	protein_coding	P63010	1118	1761	731	2189	2413	2250	2274	3351	4998	6169	4086	6610	4616	6375	6581
ENSG00000006128	TAC1	protein_coding	P20366	7	25	8	19	17	11	23	32	25	26	26	51	28	48	40
ENSG00000006194	ZNF263	protein_coding	O14978	213	309	163	460	596	218	187	358	395	507	259	602	328	452	420
ENSG00000006210	CX3CL1	protein_coding	P78423	0	2	0	0	0	0	1	0	0	0	0	0	3	1	2
ENSG00000006282	SPATA20	protein_coding	Q8TB22	147	212	105	303	352	66	70	118	152	177	132	221	131	239	198
ENSG00000006283	CACNA1G	protein_coding	O43497	39	42	15	55	78	9	8	20	17	20	20	59	16	23	16
ENSG00000006327	TNFRSF12A	protein_coding	Q9NP84	199	317	90	309	473	81	111	134	218	287	191	422	266	407	305
ENSG00000006377	DLX6	protein_coding	P56179	26	49	22	46	70	37	36	63	79	107	62	124	93	107	97
ENSG00000006432	MAP3K9	protein_coding	P80192	216	300	139	338	523	143	157	250	271	331	124	323	159	275	211
ENSG00000006451	RALA	protein_coding	P11233	195	310	145	343	520	335	328	488	721	967	632	1220	734	973	976
ENSG00000006453	BAIAP2L1	protein_coding	Q9UHR4	4636	6928	2563	7140	8573	3711	4053	5805	5425	5478	7730	12852	4788	5878	5641
ENSG00000006459	KDM7A	protein_coding	Q6ZMT4	273	430	170	491	573	362	348	534	688	898	544	991	661	887	805
ENSG00000006468	ETV1	protein_coding	P50549	19	15	7	22	33	15	22	29	38	57	43	44	28	27	27
ENSG00000006530	AGK	protein_coding	Q53H12	119	198	102	235	246	272	241	377	657	849	438	750	555	914	826
ENSG00000006534	ALDH3B1	protein_coding	P43353	16	25	9	23	47	14	13	7	23	24	9	23	10	20	12
ENSG00000006555	TTC22	protein_coding	#N/A	0	0	0	0	0	0	0	0	1	1	0	0	0	0	0
ENSG00000006576	PHTF2	protein_coding	Q8N3S3	133	225	96	337	397	279	286	425	528	590	367	639	290	399	400
ENSG00000006606	CCL26	protein_coding	Q9Y258	0	1	0	0	0	0	0	0	1	0	0	0	1	0	0
ENSG00000006607	FARP2	protein_coding	O94887	486	712	289	914	1085	608	677	1012	1432	1649	882	1534	1146	1491	1406
ENSG00000006611	USH1C	protein_coding	Q9Y6N9	34	36	18	35	54	20	16	26	39	57	38	84	44	53	55
ENSG00000006625	GGCT	protein_coding	O75223	146	211	112	563	704	367	382	416	878	1048	865	1304	920	1183	1076
ENSG00000006634	DBF4	protein_coding	Q9UBU7	154	283	99	350	367	346	349	546	707	925	744	1146	635	980	946
ENSG00000006638	TBXA2R	protein_coding	P21731	8	14	9	10	6	6	4	14	11	12	6	14	5	11	16
ENSG00000006652	IFRD1	protein_coding	O00458	592	761	313	1105	1382	610	659	1009	1009	1377	470	1255	747	1227	1100
ENSG00000006659	LGALS14	protein_coding	Q8TCE9	0	0	0	0	0	0	0	0	0	0	0	0	0	0	0
ENSG00000006695	COX10	protein_coding	Q12887	90	150	56	197	235	142	126	203	313	398	168	331	174	218	212
ENSG00000006704	GTF2IRD1	protein_coding	Q9UHL9	218	348	128	468	562	135	171	232	356	431	306	514	308	475	465
ENSG00000006712	PAF1	protein_coding	Q8N7H5	1170	1603	669	1872	2247	1260	1281	1756	2432	2785	1955	3509	2458	3546	3254
ENSG00000006715	VPS41	protein_coding	P49754	474	699	287	881	1054	593	618	818	1241	1501	914	1644	1086	1485	1362
ENSG00000006740	ARHGAP44	protein_coding	Q17R89	68	97	45	129	150	66	63	90	98	121	46	131	61	86	83
ENSG00000006744	ELAC2	protein_coding	Q9BQ52	942	1387	563	1530	1777	1047	1058	1408	1779	2371	1344	2804	1767	2637	2435
ENSG00000006747	SCIN	protein_coding	Q9Y6U3	6	18	2	10	14	7	12	14	19	21	17	51	47	39	36
ENSG00000006756	ARSD	protein_coding	P51689	0	0	0	1	0	0	0	0	0	3	0	3	1	0	0
ENSG00000006757	PNPLA4	protein_coding	P41247	28	40	18	59	56	20	17	27	44	75	46	90	49	84	63
ENSG00000006788	MYH13	protein_coding	Q9UKX3	0	1	0	1	0	0	0	0	0	0	0	1	0	0	0
ENSG00000006831	ADIPOR2	protein_coding	Q86V24	661	893	374	1444	1697	685	672	992	1573	1916	1733	2824	1970	2586	2574
ENSG00000006837	CDKL3	protein_coding	Q8IVW4	23	36	8	31	41	16	20	30	48	67	50	90	53	70	74
ENSG00000007001	UPP2	protein_coding	O95045	0	0	0	0	0	0	1	0	0	0	0	0	1	0	0
ENSG00000007038	PRSS21	protein_coding	Q9Y6M0	0	0	0	0	0	0	0	0	0	1	0	0	0	0	0
ENSG00000007047	MARK4	protein_coding	Q96L34	169	241	112	317	430	101	85	139	276	337	156	331	193	287	230
ENSG00000007062	PROM1	protein_coding	O43490	0	0	0	0	0	1	0	4	3	0	0	3	0	0	0
ENSG00000007080	CCDC124	protein_coding	Q96CT7	709	1103	430	1674	1700	530	534	774	1633	2274	1761	2999	2208	3265	3081
ENSG00000007129	CEACAM21	protein_coding	Q3KPI0	0	0	0	0	0	0	0	0	0	0	0	0	0	0	0
ENSG00000007168	PAFAH1B1	protein_coding	P43034	692	1056	396	1021	1219	1277	1361	2047	2457	3125	1456	2580	1832	2569	2618
ENSG00000007171	NOS2	protein_coding	P35228	12	28	10	26	27	11	29	17	33	45	12	41	38	47	49
ENSG00000007174	DNAH9	protein_coding	Q9NYC9	0	3	0	0	0	0	0	0	1	3	0	1	0	1	1
ENSG00000007202	KIAA0100	protein_coding	Q14667	1128	1700	730	2965	3695	695	784	1252	1577	1762	1160	2746	879	1163	927
ENSG00000007216	SLC13A2	protein_coding	Q13183	0	0	0	0	0	0	0	0	0	0	0	0	0	0	0
ENSG00000007237	GAS7	protein_coding	O60861	14	33	13	36	40	26	28	33	43	58	33	82	34	42	38
ENSG00000007255	TRAPPC6A	protein_coding	O75865	44	73	31	92	101	58	61	75	133	181	139	266	154	228	223
ENSG00000007264	MATK	protein_coding	P42679	106	160	75	259	284	75	86	119	199	195	116	270	140	152	163
ENSG00000007306	CEACAM7	protein_coding	Q14002	0	0	0	0	0	0	0	0	0	0	0	0	0	0	0
ENSG00000007312	CD79B	protein_coding	P40259	0	0	1	0	0	0	1	1	0	3	0	2	0	2	0
ENSG00000007314	SCN4A	protein_coding	P35499	11	37	4	37	63	15	17	32	25	51	19	33	18	24	20
ENSG00000007341	ST7L	protein_coding	Q8TDW4	150	253	91	273	372	278	237	403	478	584	326	636	331	471	403
ENSG00000007350	TKTL1	protein_coding	P51854	1	8	2	3	6	8	5	6	11	13	8	9	10	14	22
ENSG00000007372	PAX6	protein_coding	P26367	258	477	182	411	513	265	321	418	484	701	530	912	459	664	556
ENSG00000007376	RPUSD1	protein_coding	Q9UJJ7	542	720	333	1140	1410	287	386	467	943	1190	798	1413	861	1135	1124
ENSG00000007384	RHBDF1	protein_coding	Q96CC6	139	253	78	148	231	60	59	73	84	81	81	164	95	113	80
ENSG00000007392	LUC7L	protein_coding	Q9NQ29	778	1163	415	1391	1844	641	611	835	1513	2098	1872	3590	1855	2346	2309
ENSG00000007402	CACNA2D2	protein_coding	Q9NY47	151	279	95	301	372	169	191	259	222	310	415	673	357	427	436
ENSG00000007516	BAIAP3	protein_coding	O94812	44	63	20	63	78	13	22	25	46	28	32	53	22	23	40
ENSG00000007520	TSR3	protein_coding	Q9UJK0	207	296	117	399	466	89	78	105	246	311	289	530	273	357	342
ENSG00000007541	PIGQ	protein_coding	Q9BRB3	220	246	144	300	491	110	114	180	191	245	127	253	130	219	165
ENSG00000007545	CRAMP1	protein_coding	Q96RY5	108	210	62	233	304	83	84	155	199	237	82	175	95	152	125
ENSG00000007866	TEAD3	protein_coding	Q99594	89	134	52	147	163	74	72	119	171	197	111	226	95	166	147
ENSG00000007908	SELE	protein_coding	P16581	0	0	0	0	0	0	0	1	0	0	0	3	0	0	0
ENSG00000007923	DNAJC11	protein_coding	Q9NVH1	1747	2473	894	3236	3595	1546	1588	2054	3922	4816	3506	6257	4485	5637	5557
ENSG00000007933	FMO3	protein_coding	P31513	0	0	0	0	1	0	0	0	0	0	0	1	0	0	0
ENSG00000007944	MYLIP	protein_coding	Q8WY64	114	159	79	208	250	144	131	222	287	296	168	368	122	207	207
ENSG00000007952	NOX1	protein_coding	Q9Y5S8	0	1	0	0	0	0	1	1	1	3	1	0	2	0	1
ENSG00000007968	E2F2	protein_coding	Q14209	0	0	0	0	0	0	0	0	1	1	0	0	0	0	0
ENSG00000008018	PSMB1	protein_coding	P20618	9469	16620	6187	14441	17481	11697	12697	15787	23909	23267	33176	62044	27326	35941	34701
ENSG00000008056	SYN1	protein_coding	P17600	39	49	22	50	57	40	44	38	62	80	39	71	61	106	89
ENSG00000008083	JARID2	protein_coding	Q92833	437	642	295	1015	1148	353	457	680	974	1107	545	861	630	862	879
ENSG00000008086	CDKL5	protein_coding	O76039	32	68	39	72	114	63	47	97	108	150	71	116	75	117	103
ENSG00000008118	CAMK1G	protein_coding	Q96NX5	0	2	0	0	0	1	0	0	0	1	0	0	0	0	2
ENSG00000008128	CDK11A	protein_coding	Q9UQ88	8	23	8	25	28	5	11	9	29	22	4	27	9	19	13
ENSG00000008130	NADK	protein_coding	O95544	496	694	270	860	1052	312	355	516	617	775	379	856	396	638	547
ENSG00000008196	TFAP2B	protein_coding	Q92481	0	0	0	0	0	0	0	1	0	0	0	0	1	0	0
ENSG00000008197	TFAP2D	protein_coding	Q7Z6R9	0	0	0	0	0	0	0	0	0	0	0	0	0	0	0
ENSG00000008226	DLEC1	protein_coding	Q9Y238	8	15	4	16	15	8	2	14	8	5	7	6	11	6	3
ENSG00000008256	CYTH3	protein_coding	O43739	214	276	112	418	408	217	217	351	418	568	273	579	257	360	348
ENSG00000008277	ADAM22	protein_coding	Q9P0K1	55	96	22	129	185	61	86	169	207	292	151	226	188	253	200
ENSG00000008282	SYPL1	protein_coding	Q16563	313	658	208	537	612	673	697	878	1282	1549	1107	2139	1105	1394	1398
ENSG00000008283	CYB561	protein_coding	P49447	119	164	65	139	216	59	59	107	100	111	105	192	89	99	109
ENSG00000008294	SPAG9	protein_coding	O60271	1809	2670	1056	2747	3339	1990	2037	2856	3480	4267	2737	5303	3346	4566	4308
ENSG00000008300	CELSR3	protein_coding	Q9NYQ7	1227	1767	689	1773	2594	577	687	869	1007	1269	592	1312	887	1178	1020
ENSG00000008311	AASS	protein_coding	Q9UDR5	253	337	149	276	370	300	330	477	475	597	319	642	428	557	573
ENSG00000008323	PLEKHG6	protein_coding	Q3KR16	5	6	1	6	2	3	3	4	2	8	3	2	3	4	3
ENSG00000008324	SS18L2	protein_coding	Q9UHA2	147	241	106	274	383	203	186	290	348	583	444	728	391	573	584
ENSG00000008382	MPND	protein_coding	Q8N594	105	115	42	151	213	57	60	80	123	166	81	183	93	134	131
ENSG00000008394	MGST1	protein_coding	P10620	393	638	232	676	809	908	929	1321	2151	2315	1606	2762	1613	2267	2353
ENSG00000008405	CRY1	protein_coding	Q16526	281	420	150	440	488	438	430	646	824	1032	503	958	627	864	793
ENSG00000008438	PGLYRP1	protein_coding	O75594	4	3	2	3	8	0	2	4	1	8	4	1	1	0	0
ENSG00000008441	NFIX	protein_coding	Q14938	216	329	142	373	492	134	172	280	310	371	230	481	199	307	277
ENSG00000008513	ST3GAL1	protein_coding	Q11201	29	37	14	74	64	18	18	31	47	63	35	63	36	56	43
ENSG00000008516	MMP25	protein_coding	Q9NPA2	14	13	5	11	19	2	9	19	9	13	12	8	7	13	15
ENSG00000008517	IL32	protein_coding	P24001	3	14	2	8	9	9	9	17	20	15	12	20	31	32	32
ENSG00000008710	PKD1	protein_coding	P98161	539	793	325	1044	1253	239	278	403	490	576	275	720	275	412	367
ENSG00000008735	MAPK8IP2	protein_coding	Q13387	472	719	310	707	941	505	501	673	903	943	747	1137	841	1096	1141
ENSG00000008838	MED24	protein_coding	O75448	744	1201	453	1546	1757	706	811	961	1569	2012	1312	2373	1392	1914	1581
ENSG00000008853	RHOBTB2	protein_coding	Q9BYZ6	79	126	50	195	212	44	63	113	148	114	106	184	53	94	70
ENSG00000008869	HEATR5B	protein_coding	Q9P2D3	590	1013	316	931	1219	864	950	1286	1462	1817	1009	1537	1172	1625	1518
ENSG00000008952	SEC62	protein_coding	Q99442	789	1337	571	1792	2022	1579	1509	2399	3714	4225	3113	5738	2813	4085	4171
ENSG00000008988	RPS20	protein_coding	P60866	2011	2789	993	4621	4674	2369	2162	2438	4620	5452	4718	10933	5488	7434	6975
ENSG00000009307	CSDE1	protein_coding	O75534	8090	12661	4500	12215	13936	10272	11085	15008	22038	26475	14973	28816	19235	25658	25686
ENSG00000009335	UBE3C	protein_coding	Q15386	1022	1680	629	2495	3021	1051	1187	1951	2217	2837	1236	2636	1351	2006	1812
ENSG00000009413	REV3L	protein_coding	O60673	582	838	329	1152	1592	482	512	853	993	1164	851	1928	558	669	603
ENSG00000009694	TENM1	protein_coding	Q9UKZ4	64	109	31	70	157	74	85	119	79	110	67	145	38	79	56
ENSG00000009709	PAX7	protein_coding	P23759	5	5	4	6	15	5	9	7	6	13	8	19	5	12	7
ENSG00000009724	MASP2	protein_coding	O00187	27	27	14	45	66	9	17	32	28	35	15	34	20	19	21
ENSG00000009765	IYD	protein_coding	Q6PHW0	0	0	0	1	1	0	0	1	2	2	0	0	0	2	0
ENSG00000009780	FAM76A	protein_coding	Q8TAV0	234	359	140	454	538	188	201	283	485	655	372	744	383	697	550
ENSG00000009790	TRAF3IP3	protein_coding	Q9Y228	3	2	2	1	4	0	0	1	4	3	4	5	0	3	0
ENSG00000009830	POMT2	protein_coding	Q9UKY4	296	387	142	463	656	205	203	311	380	479	219	448	239	403	347
ENSG00000009844	VTA1	protein_coding	Q9NP79	555	917	376	1066	1183	1117	1225	1749	2574	3415	2433	4131	2557	3380	3456
ENSG00000009950	MLXIPL	protein_coding	Q9NP71	68	115	46	123	116	58	65	76	121	104	72	145	82	103	106
ENSG00000009954	BAZ1B	protein_coding	Q9UIG0	3734	5749	2221	7843	8806	3732	3957	5659	8690	10150	5840	9494	8835	11405	11007
ENSG00000010017	RANBP9	protein_coding	Q96S59	596	958	311	912	1040	756	766	1096	1502	1950	1314	2317	1395	1776	1762
ENSG00000010030	ETV7	protein_coding	Q9Y603	0	4	1	2	2	1	1	2	0	1	0	0	3	0	0
ENSG00000010072	SPRTN	protein_coding	Q9H040	459	752	297	889	1069	813	882	1276	1926	2359	1288	2387	1650	2293	2165
ENSG00000010165	METTL13	protein_coding	Q8N6R0	499	701	261	982	1229	369	445	576	960	1206	963	1593	994	1491	1290
ENSG00000010219	DYRK4	protein_coding	Q9NR20	57	101	36	109	148	100	89	109	194	231	103	195	126	164	157
ENSG00000010244	ZNF207	protein_coding	O43670	325	505	209	524	622	441	498	653	967	1165	654	1288	782	1082	1131
ENSG00000010256	UQCRC1	protein_coding	P31930	2376	3572	1372	4202	4569	3315	3254	4461	7451	9272	6187	10690	8671	11357	11404
ENSG00000010270	STARD3NL	protein_coding	O95772	332	487	218	445	578	365	415	636	621	625	575	1169	486	707	608
ENSG00000010278	CD9	protein_coding	P21926	423	788	258	651	749	679	678	931	1230	1504	1785	3221	1431	2040	2005
ENSG00000010282	HHATL	protein_coding	Q9HCP6	4	3	1	4	7	2	1	1	3	8	4	7	0	0	1
ENSG00000010292	NCAPD2	protein_coding	Q15021	1917	3061	1014	3904	4311	2259	2389	3298	4980	6375	4246	6857	4564	6989	6587
ENSG00000010295	IFFO1	protein_coding	Q0D2I5	824	1126	420	1488	1947	250	280	382	497	552	603	1223	571	792	616
ENSG00000010310	GIPR	protein_coding	P48546	23	29	10	25	47	8	4	19	27	14	27	44	16	24	24
ENSG00000010318	PHF7	protein_coding	Q9BWX1	38	53	24	138	116	48	48	86	91	115	90	124	79	93	94
ENSG00000010319	SEMA3G	protein_coding	Q9NS98	41	79	30	106	144	23	35	52	56	90	65	141	58	89	79
ENSG00000010322	NISCH	protein_coding	Q9Y2I1	1370	1898	728	2728	3503	733	932	1338	1734	2126	1014	2228	1141	1679	1453
ENSG00000010327	STAB1	protein_coding	Q9NY15	3	12	4	9	11	5	2	3	6	1	3	3	0	4	4
ENSG00000010361	FUZ	protein_coding	Q9BT04	512	676	285	724	943	396	427	585	815	949	586	1117	638	897	722
ENSG00000010379	SLC6A13	protein_coding	Q9NSD5	55	59	13	49	54	23	13	25	24	17	7	41	7	9	12
ENSG00000010404	IDS	protein_coding	P22304	108	146	37	141	221	146	174	281	184	213	108	192	85	125	97
ENSG00000010438	PRSS3	protein_coding	P35030	0	1	1	2	1	0	0	0	2	0	1	1	0	1	0
ENSG00000010539	ZNF200	protein_coding	P98182	416	761	280	789	921	420	505	687	739	758	1182	2299	1085	1310	1473
ENSG00000010610	CD4	protein_coding	P01730	10	16	2	6	21	1	3	8	7	7	7	5	2	9	3
ENSG00000010626	LRRC23	protein_coding	Q53EV4	47	51	24	109	123	49	33	60	113	154	54	121	80	129	116
ENSG00000010671	BTK	protein_coding	Q06187	13	13	11	24	28	10	13	19	31	18	14	33	14	21	9
ENSG00000010704	HFE	protein_coding	Q30201	7	4	1	5	4	0	4	4	7	8	0	2	5	3	5
ENSG00000010803	SCMH1	protein_coding	Q96GD3	298	353	148	408	559	235	264	350	394	445	193	429	255	316	289
ENSG00000010810	FYN	protein_coding	P06241	841	1202	544	1388	1812	908	954	1452	1572	1817	1635	3067	1282	1782	1650
ENSG00000010818	HIVEP2	protein_coding	P31629	157	239	65	299	341	168	204	324	303	419	239	459	252	297	308
ENSG00000010932	FMO1	protein_coding	Q01740	0	1	0	0	0	0	0	0	0	1	0	0	0	0	0
ENSG00000011007	TCEB3	protein_coding	#N/A	388	627	230	814	1016	545	554	909	1316	1638	810	1283	1157	1669	1643
ENSG00000011009	LYPLA2	protein_coding	O95372	90	160	52	191	230	69	104	92	173	242	186	333	195	302	274
ENSG00000011021	CLCN6	protein_coding	P51797	331	512	187	638	842	177	213	255	372	411	341	611	322	474	431
ENSG00000011028	MRC2	protein_coding	Q9UBG0	227	336	130	285	390	160	156	225	214	273	168	364	204	342	247
ENSG00000011052	NME1-NME2	protein_coding	#N/A	0	0	0	0	0	0	0	0	0	0	0	0	0	0	0
ENSG00000011083	SLC6A7	protein_coding	Q99884	0	0	0	1	1	2	2	0	0	0	0	0	0	0	0
ENSG00000011105	TSPAN9	protein_coding	O75954	85	150	58	131	186	105	95	183	177	218	181	270	137	216	188
ENSG00000011114	BTBD7	protein_coding	Q9P203	0	5	0	4	1	1	1	0	0	1	0	2	1	2	1
ENSG00000011132	APBA3	protein_coding	O96018	136	175	98	230	288	121	93	108	164	222	133	298	128	228	209
ENSG00000011143	MKS1	protein_coding	Q9NXB0	259	364	131	395	487	225	253	411	476	644	407	671	486	705	642
ENSG00000011198	ABHD5	protein_coding	Q8WTS1	165	256	111	419	439	233	221	363	523	677	444	775	509	723	684
ENSG00000011201	ANOS1	protein_coding	P23352	0	0	0	0	0	1	1	0	3	4	1	3	0	4	1
ENSG00000011243	AKAP8L	protein_coding	Q9ULX6	1759	2170	675	2482	2873	860	754	1055	1470	1775	1831	3857	1793	2399	2389
ENSG00000011258	MBTD1	protein_coding	Q05BQ5	254	351	129	477	537	284	281	433	496	559	287	632	281	428	363
ENSG00000011260	UTP18	protein_coding	Q9Y5J1	805	1236	513	1821	1696	1671	1708	2355	3742	3814	1441	2508	2796	3923	3875
ENSG00000011275	RNF216	protein_coding	Q9NWF9	658	1041	397	1216	1526	670	794	994	1475	1850	1167	2392	1226	1766	1593
ENSG00000011295	TTC19	protein_coding	Q6DKK2	379	560	207	706	993	341	419	619	768	832	478	921	526	890	823
ENSG00000011304	PTBP1	protein_coding	P26599	2373	3853	1435	5181	5754	3076	3149	4586	8555	11080	5222	8709	7007	9614	9957
ENSG00000011332	DPF1	protein_coding	Q92782	205	330	115	321	394	124	95	166	232	304	261	398	290	424	396
ENSG00000011347	SYT7	protein_coding	O43581	42	39	30	108	154	25	28	42	75	97	59	102	68	83	51
ENSG00000011376	LARS2	protein_coding	Q15031	430	582	260	646	804	682	770	1044	1270	1551	798	1495	958	1405	1361
ENSG00000011405	PIK3C2A	protein_coding	O00443	798	1139	507	1262	1657	1243	1396	2132	2290	2986	1367	2655	1354	1903	1737
ENSG00000011422	PLAUR	protein_coding	Q03405	87	128	51	165	198	66	64	101	176	229	145	269	145	212	206
ENSG00000011426	ANLN	protein_coding	Q9NQW6	1000	1597	714	2346	2542	1546	1740	2616	3787	4698	2194	3630	3941	5206	5521
ENSG00000011451	WIZ	protein_coding	O95785	354	592	197	585	761	300	318	417	628	836	376	768	633	879	761
ENSG00000011454	RABGAP1	protein_coding	Q9Y3P9	610	859	358	1411	1549	877	929	1459	2081	2479	1174	2126	1438	2058	1933
ENSG00000011465	DCN	protein_coding	P07585	0	1	0	2	0	0	1	0	0	1	3	5	1	2	0
ENSG00000011478	QPCTL	protein_coding	Q9NXS2	169	286	100	373	418	131	178	221	372	441	313	640	283	451	439
ENSG00000011485	PPP5C	protein_coding	P53041	1106	1532	737	2992	3328	985	973	1354	2159	2839	1696	3552	2098	3313	2900
ENSG00000011523	CEP68	protein_coding	Q76N32	181	315	104	448	576	203	238	349	510	576	335	555	357	520	428
ENSG00000011566	MAP4K3	protein_coding	Q8IVH8	215	335	116	358	456	317	356	491	598	725	347	733	418	535	612
ENSG00000011590	ZBTB32	protein_coding	Q9Y2Y4	6	8	0	9	16	1	6	9	5	11	3	6	3	3	6
ENSG00000011600	TYROBP	protein_coding	O43914	0	0	0	0	1	0	0	0	0	0	0	0	0	0	0
ENSG00000011638	TMEM159	protein_coding	Q96B96	47	44	24	74	71	46	63	74	88	127	141	208	49	140	137
ENSG00000011677	GABRA3	protein_coding	P34903	0	0	0	0	0	1	0	0	0	0	0	1	0	2	0
ENSG00000012048	BRCA1	protein_coding	P38398	660	1019	391	1301	1500	1089	1240	1850	2408	2956	1375	2306	1845	2615	2455
ENSG00000012061	ERCC1	protein_coding	P07992	446	787	250	732	885	417	411	434	696	980	1271	2142	982	1093	1178
ENSG00000012124	CD22	protein_coding	P20273	1	1	0	1	0	0	2	0	0	1	0	1	0	0	2
ENSG00000012171	SEMA3B	protein_coding	Q13214	67	111	62	140	186	27	28	40	43	66	50	103	72	105	77
ENSG00000012174	MBTPS2	protein_coding	O43462	466	835	329	844	1026	866	883	1475	1499	2030	1225	2304	1364	1834	1679
ENSG00000012211	PRICKLE3	protein_coding	O43900	73	107	41	132	153	76	72	99	164	179	87	206	148	187	179
ENSG00000012223	LTF	protein_coding	P02788	1	0	0	0	1	0	0	0	0	0	0	1	0	2	0
ENSG00000012232	EXTL3	protein_coding	O43909	228	332	148	460	699	232	244	433	503	601	345	647	364	474	389
ENSG00000012504	NR1H4	protein_coding	Q96RI1	0	0	0	0	1	0	0	0	0	0	0	0	2	0	0
ENSG00000012660	ELOVL5	protein_coding	Q9NYP7	684	979	343	1178	1307	1012	1036	1404	1927	2615	1773	3437	1768	2474	2346
ENSG00000012779	ALOX5	protein_coding	P09917	0	0	0	0	0	0	0	0	0	0	0	0	0	0	0
ENSG00000012817	KDM5D	protein_coding	Q9BY66	19	10	7	9	13	12	17	26	12	14	5	41	12	9	4
ENSG00000012822	CALCOCO1	protein_coding	Q9P1Z2	392	734	208	508	591	338	363	432	523	784	1206	1970	1091	1276	1235
ENSG00000012963	UBR7	protein_coding	Q8N806	0	2	0	2	6	2	3	2	6	13	13	11	5	9	5
ENSG00000012983	MAP4K5	protein_coding	Q9Y4K4	224	436	160	365	484	396	459	635	760	1061	454	819	518	755	698
ENSG00000013016	EHD3	protein_coding	Q9NZN3	43	75	21	79	106	21	31	39	83	106	54	87	74	113	70
ENSG00000013275	PSMC4	protein_coding	P43686	9	11	8	6	11	11	13	14	26	69	19	18	16	31	25
ENSG00000013288	MAN2B2	protein_coding	Q9Y2E5	207	253	108	375	521	94	148	169	265	335	218	407	258	374	307
ENSG00000013293	SLC7A14	protein_coding	Q8TBB6	0	0	0	0	0	0	0	0	0	0	0	0	0	0	0
ENSG00000013297	CLDN11	protein_coding	O75508	1	1	2	0	2	0	0	1	2	0	5	0	3	0	0
ENSG00000013306	SLC25A39	protein_coding	Q9BZJ4	1639	2330	838	2149	2680	971	993	1277	1463	2128	1639	3396	1306	1844	1562
ENSG00000013364	MVP	protein_coding	Q14764	50	88	39	95	146	33	39	75	95	111	29	105	43	78	67
ENSG00000013374	NUB1	protein_coding	Q9Y5A7	817	1548	616	2004	2630	1764	1830	2809	3988	5345	3900	5829	5370	6455	6959
ENSG00000013375	PGM3	protein_coding	O95394	519	806	342	841	893	1067	1118	1554	1951	2547	1249	2376	1703	2263	2232
ENSG00000013392	RWDD2A	protein_coding	#N/A	62	147	44	132	170	146	166	254	271	330	328	552	311	410	332
ENSG00000013441	CLK1	protein_coding	P49759	897	1294	541	1499	1645	1392	1361	2140	2376	3097	2143	3785	2714	3539	3733
ENSG00000013503	POLR3B	protein_coding	Q9NW08	288	468	178	720	782	625	605	929	1415	1644	776	1151	1102	1498	1552
ENSG00000013523	ANGEL1	protein_coding	Q9UNK9	609	879	329	792	1134	489	627	763	1028	1269	526	1275	752	953	849
ENSG00000013561	RNF14	protein_coding	Q9UBS8	324	487	211	679	714	492	426	637	1037	1268	843	1443	902	1218	1160
ENSG00000013563	DNASE1L1	protein_coding	P49184	91	140	59	214	272	62	73	134	140	136	119	192	77	98	98
ENSG00000013573	DDX11	protein_coding	Q96FC9	1020	1644	592	1513	2215	280	333	425	496	553	699	1613	650	882	780
ENSG00000013583	HEBP1	protein_coding	Q9NRV9	437	679	240	657	789	655	695	780	1110	1482	1571	2508	1436	1617	1783
ENSG00000013588	GPRC5A	protein_coding	Q8NFJ5	44	59	21	60	85	58	75	85	82	159	113	212	132	174	152
ENSG00000013619	MAMLD1	protein_coding	Q13495	12	29	14	47	55	28	26	57	52	76	40	75	65	59	67
ENSG00000013725	CD6	protein_coding	P30203	0	0	0	1	0	0	0	2	0	0	0	1	0	0	0
ENSG00000013810	TACC3	protein_coding	Q9Y6A5	1629	2659	1060	3192	3733	1684	1616	2223	3602	4705	4087	7131	3833	5562	5418
ENSG00000014123	UFL1	protein_coding	O94874	465	803	264	762	891	789	774	1209	1454	1688	1202	1908	1363	1856	1810
ENSG00000014138	POLA2	protein_coding	Q14181	748	1484	505	1627	2102	1279	1452	1706	2853	3858	1592	2758	2582	3385	3171
ENSG00000014164	ZC3H3	protein_coding	Q8IXZ2	72	93	49	118	152	36	44	63	98	122	51	96	66	106	94
ENSG00000014216	CAPN1	protein_coding	P07384	406	617	243	685	830	547	587	766	1115	1540	821	1390	1122	1649	1717
ENSG00000014257	ACPP	protein_coding	P15309	0	9	0	1	5	2	3	5	1	5	9	9	8	7	7
ENSG00000014641	MDH1	protein_coding	P40925	11671	25757	7634	17627	21791	13616	15824	19852	24562	26673	47558	85076	40891	49009	48512
ENSG00000014824	SLC30A9	protein_coding	Q6PML9	371	527	212	605	842	592	636	908	1097	1468	698	1305	818	1248	1046
ENSG00000014914	MTMR11	protein_coding	A4FU01	40	42	26	38	51	23	22	35	41	56	24	57	12	20	13
ENSG00000014919	COX15	protein_coding	Q7KZN9	981	1482	613	1202	1473	1364	1499	1987	2041	2288	2188	4177	1836	2511	2340
ENSG00000015133	CCDC88C	protein_coding	Q9P219	311	437	166	600	824	218	224	309	449	534	301	604	358	441	386
ENSG00000015153	YAF2	protein_coding	Q8IY57	107	109	59	164	194	160	178	241	328	509	280	585	261	322	365
ENSG00000015171	ZMYND11	protein_coding	Q15326	226	356	157	456	575	275	237	378	528	640	299	571	461	761	678
ENSG00000015285	WAS	protein_coding	P42768	35	28	20	41	54	28	26	39	27	66	22	62	39	73	53
ENSG00000015413	DPEP1	protein_coding	P16444	5	4	0	9	11	1	7	6	15	4	9	16	10	19	9
ENSG00000015475	BID	protein_coding	P55957	147	222	80	254	334	170	201	271	467	621	358	701	449	671	614
ENSG00000015479	MATR3.2	protein_coding	#N/A	13	28	14	51	33	25	39	44	36	46	25	58	24	34	30
ENSG00000015520	NPC1L1	protein_coding	Q9UHC9	41	69	26	43	70	11	16	19	22	35	14	56	17	22	13
ENSG00000015532	XYLT2	protein_coding	Q9H1B5	229	343	145	492	668	209	204	304	421	430	280	572	232	363	367
ENSG00000015568	RGPD5	protein_coding	Q99666	24	57	9	32	29	42	41	91	50	71	44	34	42	87	42
ENSG00000015592	STMN4	protein_coding	Q9H169	0	0	1	1	3	2	1	1	1	3	1	2	2	4	2
ENSG00000015676	NUDCD3	protein_coding	Q8IVD9	590	844	350	1199	1646	446	458	666	1037	1305	996	1898	1151	1469	1457
ENSG00000016082	ISL1	protein_coding	P61371	131	224	61	244	275	148	170	220	324	436	309	547	323	450	436
ENSG00000016391	CHDH	protein_coding	Q8NE62	238	324	127	423	534	162	193	282	285	341	240	454	214	274	263
ENSG00000016402	IL20RA	protein_coding	Q9UHF4	0	0	0	0	0	0	0	0	0	0	0	1	0	0	0
ENSG00000016490	CLCA1	protein_coding	A8K7I4	0	0	0	0	0	0	0	0	0	0	0	0	0	0	0
ENSG00000016602	CLCA4	protein_coding	Q14CN2	0	0	0	0	0	0	0	0	0	0	0	1	0	0	0
ENSG00000016864	GLT8D1	protein_coding	Q68CQ7	171	384	105	365	374	317	359	444	504	675	477	976	506	659	595
ENSG00000017260	ATP2C1	protein_coding	P98194	378	610	244	810	921	612	713	985	1357	1611	1556	2347	1484	1853	1648
ENSG00000017427	IGF1	protein_coding	P05019	0	0	0	0	0	0	0	0	0	1	0	0	0	0	0
ENSG00000017483	SLC38A5	protein_coding	Q8WUX1	3	7	0	7	15	0	4	5	2	6	3	7	2	5	2
ENSG00000017797	RALBP1	protein_coding	Q15311	194	315	92	536	649	229	205	341	567	704	465	860	506	676	645
ENSG00000018189	RUFY3	protein_coding	Q7L099	208	361	159	438	523	296	295	410	598	764	521	761	497	641	683
ENSG00000018236	CNTN1	protein_coding	Q12860	64	100	42	94	114	143	163	206	267	291	172	292	189	258	230
ENSG00000018280	SLC11A1	protein_coding	P49279	1	4	4	5	3	4	6	2	7	12	1	11	1	7	4
ENSG00000018408	WWTR1	protein_coding	Q9GZV5	314	480	135	951	1138	182	202	266	600	733	663	1245	926	950	1056
ENSG00000018510	AGPS	protein_coding	O00116	414	708	277	824	911	928	1011	1515	2323	2855	1357	2315	1624	2494	2528
ENSG00000018607	ZNF806	unprocessed_pseudogene	P0C7X5	1	0	0	0	2	0	0	0	0	1	3	0	0	2	0
ENSG00000018610	CXorf56	protein_coding	Q9H5V9	248	460	163	560	656	394	420	579	866	1204	950	1835	949	1287	1270
ENSG00000018625	ATP1A2	protein_coding	P50993	0	0	0	0	3	0	0	0	2	2	1	0	0	0	3
ENSG00000018699	TTC27	protein_coding	Q6P3X3	330	551	199	997	1105	600	660	933	1433	1676	654	1132	852	1342	1115
ENSG00000018869	ZNF582	protein_coding	Q96NG8	62	118	35	127	169	49	53	50	141	137	174	266	174	199	218
ENSG00000019102	VSIG2	protein_coding	Q96IQ7	5	7	3	8	18	3	4	4	8	10	5	1	4	2	5
ENSG00000019144	PHLDB1	protein_coding	Q86UU1	229	397	144	470	503	218	311	306	507	728	485	634	548	667	581
ENSG00000019169	MARCO	protein_coding	Q9UEW3	0	0	0	0	0	0	0	1	0	2	0	0	0	0	0
ENSG00000019186	CYP24A1	protein_coding	Q07973	1	0	0	0	0	0	0	0	0	2	0	1	2	2	0
ENSG00000019485	PRDM11	protein_coding	Q9NQV5	25	36	19	70	109	26	31	48	76	81	30	70	44	62	43
ENSG00000019505	SYT13	protein_coding	Q7L8C5	0	6	1	3	4	1	3	2	2	1	3	3	3	5	3
ENSG00000019549	SNAI2	protein_coding	O43623	72	79	38	115	142	77	89	112	188	235	119	298	162	248	215
ENSG00000019582	CD74	protein_coding	P04233	3	1	4	9	16	7	7	1	10	13	9	7	5	8	3
ENSG00000019991	HGF	protein_coding	P14210	0	0	0	1	1	0	0	1	1	1	0	4	2	0	4
ENSG00000019995	ZRANB1	protein_coding	Q9UGI0	311	642	233	739	929	389	441	666	892	1040	808	1579	749	1027	971
ENSG00000020129	NCDN	protein_coding	Q9UBB6	332	552	235	664	778	357	373	503	836	1111	600	1085	716	1064	1000
ENSG00000020181	ADGRA2	protein_coding	Q96PE1	125	159	65	120	168	40	45	60	104	104	68	133	43	80	73
ENSG00000020219	CCT8L1P	processed_pseudogene	A6NM43	2	0	0	0	7	3	1	6	6	4	2	6	2	1	1
ENSG00000020256	ZFP64	protein_coding	Q9NPA5	369	640	252	584	816	585	703	924	978	1254	985	1662	961	1155	1033
ENSG00000020426	MNAT1	protein_coding	P51948	337	474	200	628	668	596	548	855	1275	1726	951	1769	1108	1550	1549
ENSG00000020577	SAMD4A	protein_coding	Q9UPU9	83	140	77	192	259	53	76	122	134	132	67	141	117	180	143
ENSG00000020633	RUNX3	protein_coding	Q13761	31	53	18	61	73	13	28	51	38	46	20	59	32	41	30
ENSG00000020922	MRE11	protein_coding	P49959	453	661	254	705	900	826	948	1388	1904	2452	899	1431	1386	1841	2051
ENSG00000021300	PLEKHB1	protein_coding	Q9UF11	130	252	106	156	195	183	231	199	245	305	645	940	475	652	565
ENSG00000021355	SERPINB1	protein_coding	P30740	234	346	134	435	459	400	390	557	725	809	720	1258	654	972	904
ENSG00000021461	CYP3A43	protein_coding	Q9HB55	0	0	0	1	1	0	1	0	0	0	0	0	0	0	1
ENSG00000021488	SLC7A9	protein_coding	P82251	11	5	1	6	7	11	0	4	4	11	2	4	1	3	3
ENSG00000021574	SPAST	protein_coding	Q9UBP0	242	370	148	378	396	371	399	580	732	923	613	1069	541	826	785
ENSG00000021645	NRXN3	protein_coding	Q9Y4C0	70	112	24	156	208	99	92	130	199	232	125	261	137	205	185
ENSG00000021762	OSBPL5	protein_coding	Q9H0X9	102	153	63	183	226	43	36	53	109	143	125	231	89	138	126
ENSG00000021776	AQR	protein_coding	O60306	1157	1954	776	2478	3087	1509	1678	2243	3094	3649	1947	3413	2255	2936	2875
ENSG00000021826	CPS1	protein_coding	P31327	138	245	107	240	278	298	299	406	461	541	283	514	281	415	370
ENSG00000021852	C8B	protein_coding	P07358	0	0	0	0	0	0	0	0	0	0	0	0	0	0	0
ENSG00000022267	FHL1	protein_coding	Q13642	1222	2013	739	2206	2724	1786	1750	2171	3768	4756	3852	6549	4334	5687	5427
ENSG00000022277	RTFDC1	protein_coding	Q9BY42	830	1232	567	1948	2244	1345	1435	2270	3052	4008	3118	4957	3067	4432	4501
ENSG00000022355	GABRA1	protein_coding	P14867	0	0	0	0	0	0	0	0	0	0	0	0	0	0	0
ENSG00000022556	NLRP2	protein_coding	Q9NX02	0	0	0	0	0	0	0	0	0	0	0	0	0	0	0
ENSG00000022567	SLC45A4	protein_coding	Q5BKX6	138	219	74	228	297	99	96	136	186	242	116	285	111	192	127
ENSG00000022840	RNF10	protein_coding	Q8N5U6	605	879	372	1153	1560	515	548	885	1002	1279	675	1457	639	1051	888
ENSG00000022976	ZNF839	protein_coding	A8K0R7	173	220	96	252	340	117	134	216	246	338	167	317	172	255	272
ENSG00000023041	ZDHHC6	protein_coding	Q9H6R6	303	429	203	655	896	234	226	312	377	519	397	745	399	537	454
ENSG00000023171	GRAMD1B	protein_coding	Q3KR37	75	109	42	132	178	65	86	103	142	162	77	160	100	171	143
ENSG00000023191	RNH1	protein_coding	P13489	10	10	1	93	8	1	8	3	50	20	14	327	281	398	347
ENSG00000023228	NDUFS1	protein_coding	P28331	6	10	1	11	7	19	39	18	42	56	20	36	36	127	89
ENSG00000023287	RB1CC1	protein_coding	Q8TDY2	738	1096	413	1158	1582	1029	1216	1715	1934	2563	2024	3290	1681	2123	1936
ENSG00000023318	ERP44	protein_coding	Q9BS26	2370	4076	1083	3400	3750	2880	3128	3936	5222	5941	6085	11968	6111	7713	7414
ENSG00000023330	ALAS1	protein_coding	P13196	731	1142	497	1279	1677	770	781	1092	1662	2313	1961	3663	2605	3675	3626
ENSG00000023445	BIRC3	protein_coding	Q13489	0	0	1	1	3	3	0	0	4	2	0	1	0	6	0
ENSG00000023516	AKAP11	protein_coding	Q9UKA4	479	698	256	796	1069	704	844	1256	1585	1971	985	1847	1048	1517	1390
ENSG00000023572	GLRX2	protein_coding	Q9NS18	196	288	102	376	441	323	395	561	887	1098	600	1175	960	1294	1308
ENSG00000023608	SNAPC1	protein_coding	Q16533	148	214	81	436	501	196	193	261	443	817	521	657	775	1126	941
ENSG00000023697	DERA	protein_coding	Q9Y315	253	357	144	549	632	299	342	476	727	917	621	1124	793	1064	1045
ENSG00000023734	STRAP	protein_coding	Q9Y3F4	3337	4432	1607	4732	5114	4042	4015	5862	7846	8953	6712	12289	6139	8375	8200
ENSG00000023839	ABCC2	protein_coding	Q92887	35	32	21	54	69	18	9	32	34	26	21	58	8	17	15
ENSG00000023892	DEF6	protein_coding	Q9H4E7	32	38	13	50	56	23	30	40	49	80	31	78	40	61	58
ENSG00000023902	PLEKHO1	protein_coding	Q53GL0	149	220	72	283	386	128	147	204	314	372	222	482	217	355	321
ENSG00000023909	GCLM	protein_coding	P48507	191	354	134	305	351	498	507	824	883	1056	652	1205	529	794	809
ENSG00000024048	UBR2	protein_coding	Q8IWV8	723	1085	405	1372	1598	1032	1080	1711	2477	2647	1124	1755	1624	2336	2336
ENSG00000024422	EHD2	protein_coding	Q9NZN4	40	78	35	84	91	40	46	59	78	103	63	127	132	143	147
ENSG00000024526	DEPDC1	protein_coding	Q5TB30	334	491	190	464	505	555	559	745	890	1236	651	1544	753	1041	963
ENSG00000024862	CCDC28A	protein_coding	Q8IWP9	72	176	69	217	305	164	132	189	313	488	412	660	383	593	551
ENSG00000025039	RRAGD	protein_coding	Q9NQL2	99	137	51	208	272	111	99	150	221	321	109	222	195	218	256
ENSG00000025156	HSF2	protein_coding	Q03933	396	670	236	775	1013	685	675	1021	1651	2000	1186	2029	1374	1947	2024
ENSG00000025293	PHF20	protein_coding	Q9BVI0	373	582	227	856	1136	463	536	656	1138	1248	605	1181	893	1298	1296
ENSG00000025423	HSD17B6	protein_coding	O14756	59	105	31	162	208	118	113	159	267	297	182	357	266	361	281
ENSG00000025434	NR1H3	protein_coding	Q13133	81	131	75	142	201	48	65	107	106	125	117	186	109	186	141
ENSG00000025708	TYMP	protein_coding	P19971	21	13	13	28	41	10	7	20	31	27	15	23	7	16	15
ENSG00000025770	NCAPH2	protein_coding	Q6IBW4	499	674	265	873	1085	350	368	474	766	994	747	1369	668	1012	951
ENSG00000025772	TOMM34	protein_coding	Q15785	1464	2404	945	2390	2695	2568	2514	3108	4372	5236	7028	11995	6103	7347	7273
ENSG00000025796	SEC63	protein_coding	Q9UGP8	590	834	370	884	970	925	933	1310	1603	2049	1037	2141	1108	1710	1605
ENSG00000025800	KPNA6	protein_coding	O60684	969	1483	600	2093	2546	1234	1299	2128	2958	3824	2321	3940	2673	3831	3680
ENSG00000026025	VIM	protein_coding	P08670	1574	2397	1107	2606	2717	3578	3625	5410	6047	7609	5863	9959	4943	6892	7029
ENSG00000026036	RTEL1-TNFRSF6B	protein_coding	F6WH68	20	32	17	51	64	6	11	4	11	15	9	29	5	12	9
ENSG00000026103	FAS	protein_coding	P25445	33	38	14	64	54	57	59	89	126	171	67	97	89	131	143
ENSG00000026297	RNASET2	protein_coding	O00584	64	94	41	169	159	117	91	140	160	255	188	391	218	300	276
ENSG00000026508	CD44	protein_coding	P16070	3	1	0	9	5	3	2	5	6	7	12	5	16	18	6
ENSG00000026559	KCNG1	protein_coding	Q9UIX4	94	115	24	146	196	37	50	79	110	128	117	213	100	130	130
ENSG00000026652	AGPAT4	protein_coding	Q9NRZ5	734	1168	407	1347	1816	380	441	537	779	1041	1107	2114	995	1111	1062
ENSG00000026751	SLAMF7	protein_coding	Q9NQ25	2	0	0	0	0	0	1	1	0	0	0	0	0	0	0
ENSG00000026950	BTN3A1	protein_coding	O00481	32	43	17	42	67	32	52	48	58	89	67	111	37	55	60
ENSG00000027001	MIPEP	protein_coding	Q99797	292	376	148	366	404	423	399	551	685	828	464	857	569	821	807
ENSG00000027075	PRKCH	protein_coding	P24723	119	132	72	174	202	83	113	151	114	133	113	296	98	119	134
ENSG00000027644	INSRR	protein_coding	P14616	2	2	1	3	2	3	5	4	2	3	5	2	6	4	4
ENSG00000027697	IFNGR1	protein_coding	P15260	457	633	255	786	851	705	692	909	1534	1948	1400	2692	1539	2068	1866
ENSG00000027847	B4GALT7	protein_coding	Q9UBV7	217	292	133	415	550	109	106	200	272	282	220	451	223	363	336
ENSG00000027869	SH2D2A	protein_coding	Q9NP31	27	26	14	45	43	21	24	21	51	71	42	74	43	53	57
ENSG00000028116	VRK2	protein_coding	Q86Y07	162	268	98	270	356	244	297	440	622	844	322	595	486	684	649
ENSG00000028137	TNFRSF1B	protein_coding	P20333	0	1	1	1	3	4	6	4	2	3	0	3	2	3	1
ENSG00000028203	VEZT	protein_coding	Q9HBM0	189	278	110	440	500	359	341	578	559	844	411	821	412	627	549
ENSG00000028277	POU2F2	protein_coding	P09086	26	31	12	34	35	13	13	16	16	20	22	33	24	25	24
ENSG00000028310	BRD9	protein_coding	Q9H8M2	511	710	320	1001	1124	300	350	471	689	780	458	1008	479	632	653
ENSG00000028528	SNX1	protein_coding	Q13596	344	501	222	816	1063	436	477	703	1086	1477	821	1413	1043	1416	1284
ENSG00000028839	TBPL1	protein_coding	P62380	134	223	84	247	266	166	187	286	342	483	337	678	386	534	470
ENSG00000029153	ARNTL2	protein_coding	Q8WYA1	57	59	19	83	99	43	90	125	122	159	48	99	54	58	84
ENSG00000029363	BCLAF1	protein_coding	Q9NYF8	1437	2384	711	2707	3056	1776	1821	2271	3349	4071	3112	6257	3089	4131	4381
ENSG00000029364	SLC39A9	protein_coding	Q9NUM3	345	721	253	771	860	369	480	493	773	1008	1158	1924	791	1075	970
ENSG00000029534	ANK1	protein_coding	P16157	70	99	40	95	95	50	58	61	92	121	61	93	104	174	145
ENSG00000029559	IBSP	protein_coding	P21815	0	0	0	0	0	0	0	0	0	0	0	0	0	0	0
ENSG00000029639	TFB1M	protein_coding	Q8WVM0	195	323	129	399	407	389	455	642	879	1048	612	1037	681	920	811
ENSG00000029725	RABEP1	protein_coding	Q15276	758	1232	436	1557	1843	813	883	1394	1744	2059	1725	3297	1355	1815	1827
ENSG00000029993	HMGB3	protein_coding	O15347	640	1076	428	1607	1773	723	699	1149	2082	2563	2174	4040	2471	3951	3873
ENSG00000030066	NUP160	protein_coding	Q12769	1014	1569	642	2048	2145	2195	2302	3306	5170	6090	2006	3660	2969	4244	4163
ENSG00000030110	BAK1	protein_coding	Q16611	118	181	73	213	227	110	159	169	271	327	304	716	393	354	408
ENSG00000030304	MUSK	protein_coding	O15146	0	0	1	0	2	0	0	2	0	0	0	1	0	0	0
ENSG00000030419	IKZF2	protein_coding	Q9UKS7	21	30	16	38	59	27	26	43	45	81	72	114	35	68	77
ENSG00000030582	GRN	protein_coding	P28799	1546	2601	911	2930	3411	1162	1215	1639	2693	3150	3685	7089	4901	6563	6522
ENSG00000031003	FAM13B	protein_coding	Q9NYF5	638	861	370	903	946	545	670	923	933	1107	647	1336	543	779	632
ENSG00000031081	ARHGAP31	protein_coding	Q2M1Z3	26	46	20	42	69	27	44	69	72	87	68	110	44	65	69
ENSG00000031691	CENPQ	protein_coding	Q7L2Z9	152	233	99	333	405	318	331	492	786	1013	760	1193	736	1028	1009
ENSG00000031698	SARS	protein_coding	P49591	2020	3174	1139	4563	5273	2660	2635	3597	6764	8834	6186	10600	8472	12405	12554
ENSG00000031823	RANBP3	protein_coding	Q9H6Z4	984	1459	505	2095	2533	706	691	886	1439	1762	1105	2307	1307	1807	1547
ENSG00000032219	ARID4A	protein_coding	P29374	518	771	315	782	1000	553	632	941	967	1149	760	1523	727	1041	1025
ENSG00000032389	TSSC1	protein_coding	#N/A	515	834	335	948	1161	305	284	386	617	715	594	1324	723	990	907
ENSG00000032444	PNPLA6	protein_coding	Q8IY17	204	307	145	396	421	159	197	284	319	327	178	346	218	317	238
ENSG00000032742	IFT88	protein_coding	Q13099	38	69	32	69	103	87	126	154	202	265	108	199	126	189	186
ENSG00000033011	ALG1	protein_coding	Q9BT22	213	408	108	453	457	261	289	377	662	847	661	1202	673	867	882
ENSG00000033030	ZCCHC8	protein_coding	Q6NZY4	942	1315	542	1436	1642	1112	1251	1901	1431	1754	1200	2291	1239	1693	1502
ENSG00000033050	ABCF2	protein_coding	Q9UG63	1690	2444	979	2899	3305	1520	1629	2250	3407	4224	2265	4293	3250	4271	4211
ENSG00000033100	CHPF2	protein_coding	Q9P2E5	500	743	314	1109	1427	479	465	683	910	1133	519	1147	556	815	704
ENSG00000033122	LRRC7	protein_coding	Q96NW7	0	0	1	0	2	1	1	1	0	4	1	0	2	0	0
ENSG00000033170	FUT8	protein_coding	Q9BYC5	105	191	71	273	339	125	147	176	289	336	266	529	211	314	292
ENSG00000033178	UBA6	protein_coding	A0AVT1	599	837	328	768	857	1201	1208	1714	2068	2564	1244	2261	1623	2288	2107
ENSG00000033327	GAB2	protein_coding	Q9UQC2	98	113	48	126	162	60	43	86	121	157	71	153	99	127	117
ENSG00000033627	ATP6V0A1	protein_coding	Q93050	1281	1928	824	2479	3019	1483	1615	2341	3246	3758	2432	4657	3339	4450	4311
ENSG00000033800	PIAS1	protein_coding	O75925	419	714	253	1099	1254	610	693	961	1626	1942	1240	2117	1361	1954	1956
ENSG00000033867	SLC4A7	protein_coding	Q9Y6M7	382	676	233	788	882	599	693	961	1250	1632	844	1410	1151	1535	1448
ENSG00000034053	APBA2	protein_coding	Q99767	0	1	3	7	5	0	1	1	6	11	4	13	5	8	9
ENSG00000034152	MAP2K3	protein_coding	P46734	369	701	318	1044	1318	504	508	736	1230	1400	1197	2322	1062	1309	1321
ENSG00000034239	EFCAB1	protein_coding	Q9HAE3	1	1	1	0	0	3	1	0	1	2	0	2	0	3	3
ENSG00000034510	TMSB10	protein_coding	P63313	842	1285	429	1673	1738	1328	1230	1615	2680	3514	2222	4605	1874	2887	2948
ENSG00000034533	ASTE1	protein_coding	Q2TB18	83	174	69	193	240	168	178	234	333	417	217	405	210	312	320
ENSG00000034677	RNF19A	protein_coding	Q9NV58	142	191	93	208	273	217	229	296	381	476	274	529	257	351	326
ENSG00000034693	PEX3	protein_coding	P56589	168	290	113	280	364	440	440	636	826	1116	480	830	559	898	891
ENSG00000034713	GABARAPL2	protein_coding	P60520	949	1546	624	1600	1875	1593	1658	2304	2953	3517	3558	6665	3600	5172	5095
ENSG00000034971	MYOC	protein_coding	Q99972	0	0	0	0	0	0	1	3	0	0	0	0	0	0	0
ENSG00000035115	SH3YL1	protein_coding	Q96HL8	58	77	25	59	100	50	76	94	94	115	42	120	64	70	102
ENSG00000035141	FAM136A	protein_coding	Q96C01	212	266	160	349	474	262	313	490	516	633	411	877	386	599	511
ENSG00000035403	VCL	protein_coding	P18206	1100	1909	700	2170	2555	1831	1963	2796	4135	4961	2567	4173	4164	5718	5746
ENSG00000035499	DEPDC1B	protein_coding	Q8WUY9	199	265	132	384	414	340	314	428	654	833	688	1300	712	938	954
ENSG00000035664	DAPK2	protein_coding	Q9UIK4	1	16	2	12	8	7	8	20	11	23	20	25	12	10	17
ENSG00000035681	NSMAF	protein_coding	Q92636	98	158	54	214	211	162	170	233	384	442	187	321	286	394	368
ENSG00000035687	ADSS	protein_coding	P30520	744	1055	342	1188	1235	1264	1371	1935	2883	3470	1626	3110	2063	2778	2873
ENSG00000035720	STAP1	protein_coding	Q9ULZ2	1	0	0	0	4	2	0	0	4	0	1	2	2	3	0
ENSG00000035862	TIMP2	protein_coding	P16035	154	238	53	207	289	69	97	118	141	141	485	854	371	392	365
ENSG00000035928	RFC1	protein_coding	P35251	703	1117	469	1324	1398	943	1001	1573	2012	2412	1179	2164	1579	2093	2214
ENSG00000036054	TBC1D23	protein_coding	Q9NUY8	258	367	142	403	577	407	428	687	994	1243	632	1133	673	926	993
ENSG00000036257	CUL3	protein_coding	Q13618	1602	2682	1032	3396	3997	2759	3266	5461	5507	6067	3987	7261	5103	6358	6005
ENSG00000036448	MYOM2	protein_coding	P54296	2	0	0	1	0	3	1	0	4	4	1	1	4	3	9
ENSG00000036473	OTC	protein_coding	P00480	0	0	0	0	0	0	0	0	0	1	0	0	0	1	0
ENSG00000036530	CYP46A1	protein_coding	Q9Y6A2	6	8	0	13	14	3	1	1	4	3	5	7	6	8	9
ENSG00000036549	ZZZ3	protein_coding	Q8IYH5	473	771	295	1185	1322	761	802	1205	1811	2241	1034	2082	1210	1577	1566
ENSG00000036565	SLC18A1	protein_coding	P54219	0	0	0	0	1	0	0	0	0	0	0	0	0	0	0
ENSG00000036672	USP2	protein_coding	O75604	212	324	140	300	359	239	248	277	428	561	652	1222	384	563	553
ENSG00000036828	CASR.1	protein_coding	#N/A	0	0	0	0	0	0	0	0	0	1	0	0	0	0	0
ENSG00000037042	TUBG2	protein_coding	Q9NRH3	48	75	29	74	108	49	53	82	85	76	52	113	63	106	81
ENSG00000037241	RPL26L1	protein_coding	Q9UNX3	87	126	52	182	166	200	215	256	593	640	341	610	343	467	512
ENSG00000037280	FLT4	protein_coding	P35916	796	1185	440	1372	1897	367	354	485	661	813	816	1756	830	1106	965
ENSG00000037474	NSUN2	protein_coding	Q08J23	2108	3371	1262	3673	4369	2366	2505	3404	5145	6281	4886	7984	5554	7174	6579
ENSG00000037637	FBXO42	protein_coding	Q6P3S6	329	451	156	476	687	267	310	389	561	662	490	880	448	612	545
ENSG00000037749	MFAP3	protein_coding	P55082	256	370	154	592	610	332	369	515	978	1339	877	1591	941	1288	1275
ENSG00000037757	MRI1	protein_coding	Q9BV20	620	895	343	1060	1276	366	448	566	852	911	694	1230	706	1056	864
ENSG00000037897	METTL1	protein_coding	Q9UBP6	621	940	333	1082	1481	492	547	714	667	747	1078	1686	901	1080	1040
ENSG00000037965	HOXC8	protein_coding	P31273	52	61	25	124	178	36	39	55	133	135	64	133	73	145	111
ENSG00000038002	AGA	protein_coding	P20933	341	439	204	485	566	455	432	644	824	982	881	1507	992	1361	1423
ENSG00000038210	PI4K2B	protein_coding	Q8TCG2	47	56	28	116	123	23	24	38	68	62	34	59	45	71	72
ENSG00000038219	BOD1L1	protein_coding	Q8NFC6	927	1362	555	1736	2251	1269	1298	1941	2842	3513	1984	3794	2320	2964	3044
ENSG00000038274	MAT2B	protein_coding	Q9NZL9	266	443	161	513	590	479	481	803	1097	1541	893	1626	1008	1516	1586
ENSG00000038295	TLL1	protein_coding	O43897	23	27	15	39	45	30	31	55	65	74	39	39	76	96	97
ENSG00000038358	EDC4	protein_coding	Q6P2E9	585	818	367	1109	1184	645	724	1126	1598	1892	849	1527	1287	1921	1808
ENSG00000038382	TRIO	protein_coding	O75962	762	1119	474	1847	2440	598	711	1101	1586	1779	719	1411	864	1216	1119
ENSG00000038427	VCAN	protein_coding	P13611	806	1364	471	1686	1801	1549	1624	2083	3055	3881	1985	3406	2598	3442	3434
ENSG00000038532	CLEC16A	protein_coding	Q2KHT3	649	1020	316	1357	1711	563	617	945	1188	1344	1376	2141	1080	1270	1251
ENSG00000038945	MSR1	protein_coding	P21757	0	0	0	0	0	0	0	0	0	0	0	0	0	0	0
ENSG00000039068	CDH1	protein_coding	P12830	30	46	31	37	39	68	62	83	63	87	121	191	68	85	85
ENSG00000039123	SKIV2L2	protein_coding	#N/A	767	1157	524	1652	1715	1879	1933	3004	4510	5353	1581	2651	3024	4301	4504
ENSG00000039139	DNAH5	protein_coding	Q8TE73	0	1	5	4	3	5	5	9	16	3	7	5	5	6	3
ENSG00000039319	ZFYVE16	protein_coding	Q7Z3T8	297	512	222	650	609	778	832	1241	1856	2244	825	1362	1256	1615	1696
ENSG00000039523	FAM65A	protein_coding	#N/A	9	14	12	25	35	8	8	8	9	18	4	17	5	10	6
ENSG00000039537	C6	protein_coding	P13671	0	0	0	0	0	0	0	0	0	0	0	1	0	0	0
ENSG00000039560	RAI14	protein_coding	Q9P0K7	224	387	148	492	540	598	637	843	1248	1646	899	1277	887	1296	1288
ENSG00000039600	SOX30	protein_coding	O94993	2	3	2	6	6	8	3	3	7	7	3	12	4	12	9
ENSG00000039650	PNKP	protein_coding	Q96T60	321	418	154	499	592	151	191	247	406	477	327	632	329	455	426
ENSG00000039987	BEST2	protein_coding	Q8NFU1	9	12	6	11	26	1	5	10	9	9	7	15	6	12	6
ENSG00000040199	PHLPP2	protein_coding	Q6ZVD8	269	492	168	523	735	282	313	431	528	642	378	774	378	548	399
ENSG00000040275	SPDL1	protein_coding	Q96EA4	1083	1560	684	1771	2183	1805	1902	2622	3550	4426	3186	5707	2948	4103	4147
ENSG00000040341	STAU2	protein_coding	Q9NUL3	230	315	129	308	414	346	341	434	694	914	546	912	564	775	749
ENSG00000040487	PQLC2	protein_coding	Q6ZP29	239	340	121	432	512	169	153	235	360	378	321	566	361	453	453
ENSG00000040531	CTNS	protein_coding	O60931	265	419	176	491	589	186	239	345	557	690	373	731	403	632	639
ENSG00000040608	RTN4R	protein_coding	Q9BZR6	59	61	26	52	73	33	42	44	54	66	62	107	47	62	42
ENSG00000040633	PHF23	protein_coding	Q9BUL5	534	867	374	894	1152	584	625	931	970	1220	987	1913	873	1164	1163
ENSG00000040731	CDH10	protein_coding	Q9Y6N8	2	12	1	5	5	2	5	19	17	18	5	21	15	10	16
ENSG00000040933	INPP4A	protein_coding	Q96PE3	435	609	219	957	1261	304	307	509	677	950	395	808	485	646	615
ENSG00000041353	RAB27B	protein_coding	O00194	0	2	0	0	0	0	0	0	1	1	5	4	1	1	2
ENSG00000041357	PSMA4	protein_coding	P25789	7204	11439	3186	10257	11792	7574	7925	10839	13445	15888	19433	39597	17730	21276	22080
ENSG00000041515	MYO16	protein_coding	Q9Y6X6	0	0	0	0	0	0	0	0	0	0	0	1	0	0	0
ENSG00000041802	LSG1	protein_coding	Q9H089	571	847	366	1126	1339	593	631	839	1267	1717	1196	2131	1207	1587	1808
ENSG00000041880	PARP3	protein_coding	Q9Y6F1	72	110	47	140	182	45	52	83	107	121	101	118	107	147	123
ENSG00000041982	TNC	protein_coding	P24821	44	57	16	49	69	27	54	47	66	66	39	77	79	104	80
ENSG00000041988	THAP3	protein_coding	Q8WTV1	91	113	43	121	148	71	66	95	129	184	114	214	113	206	157
ENSG00000042062	FAM65C	protein_coding	#N/A	3	3	0	2	7	6	3	5	4	3	0	2	2	2	2
ENSG00000042088	TDP1	protein_coding	Q9NUW8	186	277	118	344	388	227	264	374	493	672	334	629	366	505	504
ENSG00000042286	AIFM2	protein_coding	Q9BRQ8	191	292	113	229	309	97	123	169	187	198	289	626	413	493	423
ENSG00000042304	C2orf83	protein_coding	Q53S99	0	0	0	0	0	2	0	0	0	0	0	0	0	0	0
ENSG00000042317	SPATA7	protein_coding	Q9P0W8	45	62	30	74	84	87	67	150	200	234	101	195	135	177	182
ENSG00000042429	MED17	protein_coding	A0A1W2PRB8	551	970	340	1133	1261	999	1004	1397	2014	2266	1560	2851	1874	2585	2569
ENSG00000042445	RETSAT	protein_coding	Q6NUM9	253	349	131	278	356	166	207	304	362	413	319	684	299	423	344
ENSG00000042493	CAPG	protein_coding	P40121	80	114	42	128	135	66	65	92	117	168	188	325	159	188	181
ENSG00000042753	AP2S1	protein_coding	P53680	1082	1841	710	1746	2001	1406	1353	1582	2585	3567	3405	6690	3239	4325	4199
ENSG00000042781	USH2A	protein_coding	O75445	0	0	2	0	2	1	3	3	0	2	0	3	2	0	1
ENSG00000042813	ZPBP	protein_coding	Q9BS86	0	0	0	0	0	0	0	0	0	0	0	0	0	0	2
ENSG00000042832	TG	protein_coding	P01266	0	5	1	9	13	2	3	3	9	5	2	14	2	1	2
ENSG00000042980	ADAM28	protein_coding	Q9UKQ2	0	0	0	0	0	0	0	0	0	0	0	0	0	0	0
ENSG00000043039	BARX2	protein_coding	Q9UMQ3	34	49	25	108	104	40	35	63	62	119	58	113	94	122	129
ENSG00000043093	DCUN1D1	protein_coding	Q96GG9	181	325	106	387	438	419	477	703	1082	1446	553	1161	994	1307	1180
ENSG00000043143	JADE2	protein_coding	Q9NQC1	83	131	62	165	232	45	81	90	148	143	158	179	134	176	167
ENSG00000043355	ZIC2	protein_coding	O95409	942	1383	528	1496	2025	544	569	835	1213	1606	1138	2064	1140	1598	1485
ENSG00000043462	LCP2	protein_coding	Q13094	0	0	0	1	1	0	1	0	0	0	0	2	0	2	0
ENSG00000043514	TRIT1	protein_coding	Q9H3H1	316	457	161	450	584	271	319	422	485	581	373	765	396	582	574
ENSG00000043591	ADRB1	protein_coding	P08588	3	2	2	11	17	3	7	3	8	4	4	5	5	6	2
ENSG00000044012	GUCA2B	protein_coding	Q16661	0	0	0	0	0	0	0	0	0	0	0	0	0	0	0
ENSG00000044090	CUL7	protein_coding	Q14999	467	642	254	730	872	243	343	470	534	594	331	754	456	676	598
ENSG00000044115	CTNNA1	protein_coding	P35221	1307	2070	817	2720	3077	2035	2081	3078	5595	6363	3043	4716	5769	8230	8506
ENSG00000044446	PHKA2	protein_coding	P46019	327	482	144	447	653	250	279	414	532	714	269	627	398	540	530
ENSG00000044459	CNTLN	protein_coding	Q9NXG0	109	182	66	218	203	175	183	287	348	444	247	426	314	395	397
ENSG00000044524	EPHA3	protein_coding	P29320	65	85	31	128	126	99	98	130	253	260	178	234	166	310	232
ENSG00000044574	HSPA5	protein_coding	P11021	14916	25418	9512	26829	30191	12603	12980	14838	21527	29281	39600	75986	45208	54377	54928
ENSG00000046604	DSG2	protein_coding	Q14126	1129	1890	708	1839	2227	2417	2492	3535	4367	5769	3626	6248	4091	5723	5873
ENSG00000046647	GEMIN8	protein_coding	Q9NWZ8	109	160	46	156	204	129	148	167	238	307	210	405	188	339	302
ENSG00000046651	OFD1	protein_coding	O75665	230	313	141	519	630	322	391	556	741	786	309	694	362	595	548
ENSG00000046653	GPM6B	protein_coding	Q13491	136	189	63	202	206	146	169	237	369	455	279	514	290	374	370
ENSG00000046774	MAGEC2	protein_coding	Q9UBF1	0	0	0	2	1	0	0	2	3	1	0	5	1	8	3
ENSG00000046889	PREX2	protein_coding	Q70Z35	43	73	25	89	99	81	85	118	134	177	74	137	99	120	140
ENSG00000047056	WDR37	protein_coding	Q9Y2I8	314	417	198	643	973	293	326	455	616	683	389	749	351	510	487
ENSG00000047188	YTHDC2	protein_coding	Q9H6S0	746	1188	478	1296	1551	1361	1568	2454	2620	2890	1217	1955	2082	2833	2913
ENSG00000047230	CTPS2	protein_coding	Q9NRF8	218	314	114	377	423	350	418	548	818	1044	385	708	601	766	800
ENSG00000047249	ATP6V1H	protein_coding	Q9UI12	517	822	321	1107	1134	1116	1084	1424	2198	2982	1598	2797	1973	2648	2605
ENSG00000047315	POLR2B	protein_coding	P30876	1788	3357	1210	3756	4276	4614	5024	7630	9564	11972	5785	9612	6170	8673	8321
ENSG00000047346	FAM214A	protein_coding	Q32MH5	110	129	64	178	230	106	131	163	195	261	248	329	206	322	296
ENSG00000047365	ARAP2	protein_coding	Q8WZ64	37	79	32	92	94	80	76	115	155	204	83	165	112	153	142
ENSG00000047410	TPR	protein_coding	P12270	6850	10574	4100	10823	12715	9444	10277	14691	16735	19286	10082	19251	13978	16834	16998
ENSG00000047457	CP	protein_coding	P00450	1	0	0	4	0	1	2	1	2	1	1	2	3	3	0
ENSG00000047578	KIAA0556	protein_coding	O60303	194	298	145	492	591	180	190	287	422	497	288	457	250	457	358
ENSG00000047579	DTNBP1	protein_coding	Q96EV8	617	1001	425	915	1018	661	705	1202	1381	1806	1481	2600	1607	2122	1900
ENSG00000047597	XK	protein_coding	P51811	9	23	9	20	40	23	20	24	24	39	22	36	36	41	23
ENSG00000047617	ANO2	protein_coding	Q9NQ90	1	4	0	2	11	1	0	1	3	4	0	2	3	5	2
ENSG00000047621	C12orf4	protein_coding	Q9NQ89	314	447	212	470	562	433	369	705	769	963	540	955	574	884	848
ENSG00000047634	SCML1	protein_coding	Q9UN30	663	987	418	1920	2142	956	1048	1443	2974	3547	1806	3313	2389	3279	3267
ENSG00000047644	WWC3	protein_coding	Q9ULE0	2	0	0	3	6	0	0	2	2	0	1	1	1	4	3
ENSG00000047648	ARHGAP6	protein_coding	O43182	3	1	1	0	3	0	0	1	0	0	2	7	1	0	1
ENSG00000047662	FAM184B	protein_coding	#N/A	20	25	14	35	49	10	7	23	22	36	22	39	18	25	6
ENSG00000047849	MAP4	protein_coding	P27816	1623	2596	1000	2918	3579	2362	2453	3156	5566	7331	3794	7271	5421	7082	6868
ENSG00000047932	GOPC	protein_coding	Q9HD26	402	657	231	639	744	517	595	816	1028	1353	1003	1785	1060	1402	1387
ENSG00000047936	ROS1	protein_coding	P08922	2	0	0	0	0	1	0	0	0	0	0	0	0	0	1
ENSG00000048028	USP28	protein_coding	Q96RU2	376	538	199	617	830	616	578	831	1077	1480	607	1171	843	1108	995
ENSG00000048052	HDAC9	protein_coding	Q9UKV0	12	3	4	11	10	4	4	12	17	29	14	16	10	17	22
ENSG00000048140	TSPAN17	protein_coding	Q96FV3	172	251	90	306	344	104	118	223	246	300	127	286	141	216	167
ENSG00000048162	NOP16	protein_coding	Q9Y3C1	215	235	134	431	457	306	282	422	810	1067	521	1116	624	830	896
ENSG00000048342	CC2D2A	protein_coding	Q9P2K1	72	104	46	164	185	103	117	186	262	304	112	172	230	304	279
ENSG00000048392	RRM2B	protein_coding	Q7LG56	96	159	66	204	217	165	215	329	416	529	224	424	330	430	445
ENSG00000048405	ZNF800	protein_coding	Q2TB10	236	351	97	375	436	284	313	400	471	655	316	687	390	537	476
ENSG00000048462	TNFRSF17	protein_coding	Q02223	2	1	0	6	2	0	0	3	1	0	0	1	0	0	2
ENSG00000048471	SNX29	protein_coding	Q8TEQ0	232	338	121	446	645	194	211	307	481	493	362	636	340	441	435
ENSG00000048540	LMO3	protein_coding	Q8TAP4	0	0	0	0	0	0	0	0	0	1	0	2	0	0	0
ENSG00000048544	MRPS10	protein_coding	P82664	229	375	123	441	504	423	430	688	894	1227	709	1462	919	1172	1168
ENSG00000048545	GUCA1A	protein_coding	P43080	0	0	0	0	0	0	0	0	0	0	0	0	0	0	0
ENSG00000048649	RSF1	protein_coding	Q96T23	1337	1946	745	2030	2305	1819	1985	2615	3245	3949	2924	5179	2792	3681	3551
ENSG00000048707	VPS13D	protein_coding	Q5THJ4	530	651	316	976	1303	487	556	868	1098	1253	493	1076	558	894	781
ENSG00000048740	CELF2	protein_coding	O95319	162	233	85	256	311	225	185	315	509	636	334	571	489	656	650
ENSG00000048828	FAM120A	protein_coding	Q9NZB2	583	876	375	1228	1386	581	615	971	1327	1660	812	1643	979	1396	1268
ENSG00000048991	R3HDM1	protein_coding	Q15032	240	353	153	413	354	381	418	731	633	842	446	795	429	687	602
ENSG00000049089	COL9A2	protein_coding	Q14055	7	9	1	11	21	4	4	6	4	9	6	10	4	11	6
ENSG00000049130	KITLG	protein_coding	P21583	70	135	43	129	114	124	137	180	223	305	160	322	131	186	174
ENSG00000049167	ERCC8	protein_coding	Q13216	71	119	38	130	129	85	82	128	210	271	149	264	142	223	199
ENSG00000049192	ADAMTS6	protein_coding	Q9UKP5	32	38	8	24	50	27	22	40	27	37	17	50	19	21	33
ENSG00000049239	H6PD	protein_coding	O95479	117	201	78	208	331	91	118	148	268	311	106	221	156	221	213
ENSG00000049245	VAMP3	protein_coding	Q15836	248	449	142	615	693	560	593	798	1183	1449	981	1707	906	1297	1311
ENSG00000049246	PER3	protein_coding	P56645	24	37	14	47	66	20	14	31	39	72	25	55	44	43	49
ENSG00000049247	UTS2	protein_coding	O95399	1	0	1	2	1	3	1	1	6	0	0	8	0	4	4
ENSG00000049249	TNFRSF9	protein_coding	Q07011	9	6	5	18	29	11	7	10	21	23	9	23	30	32	36
ENSG00000049283	EPN3	protein_coding	Q9H201	7	11	5	7	5	2	3	4	2	8	3	8	3	11	4
ENSG00000049323	LTBP1	protein_coding	Q14766	154	259	84	283	327	226	258	309	447	526	263	484	385	500	549
ENSG00000049449	RCN1	protein_coding	Q15293	244	295	149	502	560	338	353	497	764	1039	623	1102	908	1258	1286
ENSG00000049540	ELN	protein_coding	P15502	0	2	0	0	0	0	0	0	0	0	0	1	0	0	0
ENSG00000049541	RFC2	protein_coding	P35250	805	1255	533	1472	1546	1415	1577	2184	2668	3400	2199	4338	2528	3374	3455
ENSG00000049618	ARID1B	protein_coding	Q8NFD5	526	764	321	1080	1315	437	479	794	1139	1468	772	1250	887	1072	1116
ENSG00000049656	CLPTM1L	protein_coding	Q96KA5	135	202	129	192	254	95	99	147	123	214	84	188	86	148	104
ENSG00000049759	NEDD4L	protein_coding	Q96PU5	152	214	88	271	407	177	180	246	361	515	331	458	340	489	508
ENSG00000049768	FOXP3	protein_coding	Q9BZS1	13	15	11	30	34	3	9	14	16	17	4	12	2	8	12
ENSG00000049769	PPP1R3F	protein_coding	Q6ZSY5	52	74	39	82	136	28	32	60	48	62	59	73	59	79	91
ENSG00000049860	HEXB	protein_coding	P07686	410	567	198	688	781	572	569	756	1185	1643	1019	1679	1218	1790	1664
ENSG00000049883	PTCD2	protein_coding	Q8WV60	130	213	80	278	347	179	205	277	316	424	233	523	191	349	346
ENSG00000050030	KIAA2022	protein_coding	#N/A	13	34	16	34	24	30	34	54	36	73	40	81	40	61	59
ENSG00000050130	JKAMP	protein_coding	Q9P055	218	364	110	337	421	314	309	447	660	790	557	1065	459	715	662
ENSG00000050165	DKK3	protein_coding	Q9UBP4	14	11	6	12	13	11	14	14	12	26	11	38	16	25	16
ENSG00000050327	ARHGEF5	protein_coding	Q12774	0	0	0	0	0	0	0	0	0	0	0	0	0	0	0
ENSG00000050344	NFE2L3	protein_coding	Q9Y4A8	35	64	14	74	87	78	79	141	169	241	72	124	76	118	105
ENSG00000050393	MCUR1	protein_coding	Q96AQ8	199	289	105	268	400	218	240	329	440	540	258	566	402	503	509
ENSG00000050405	LIMA1	protein_coding	Q9UHB6	890	1344	501	1437	1786	1035	1053	1348	1622	1934	1101	2683	1792	2640	2689
ENSG00000050426	LETMD1	protein_coding	Q6P1Q0	310	485	190	637	707	402	483	658	794	1042	815	1709	756	1131	1108
ENSG00000050438	SLC4A8	protein_coding	Q2Y0W8	9	29	8	34	31	11	14	43	28	31	16	25	21	39	33
ENSG00000050555	LAMC3	protein_coding	Q9Y6N6	43	60	24	68	95	26	24	44	64	59	39	85	45	80	51
ENSG00000050628	PTGER3	protein_coding	P43115	0	0	0	9	11	0	0	1	3	3	1	3	0	1	0
ENSG00000050730	TNIP3	protein_coding	Q96KP6	0	2	1	1	0	0	0	0	0	0	4	3	6	1	3
ENSG00000050748	MAPK9	protein_coding	P45984	368	516	231	635	738	526	593	928	980	1229	622	1252	625	926	827
ENSG00000050767	COL23A1	protein_coding	Q86Y22	11	12	12	21	17	9	6	7	10	8	9	25	11	17	13
ENSG00000050820	BCAR1	protein_coding	P56945	543	768	285	876	1097	299	371	438	718	883	652	1208	790	1057	1002
ENSG00000051009	FAM160A2	protein_coding	Q8N612	461	694	270	733	931	377	422	473	636	719	563	1195	541	664	628
ENSG00000051108	HERPUD1	protein_coding	Q15011	328	450	196	681	867	324	319	531	673	981	780	1379	828	1245	1133
ENSG00000051128	HOMER3	protein_coding	Q9NSC5	16	34	10	31	38	6	8	29	36	51	44	64	38	46	31
ENSG00000051180	RAD51	protein_coding	Q06609	193	276	98	365	440	288	282	407	564	628	501	926	506	702	711
ENSG00000051341	POLQ	protein_coding	O75417	733	1076	461	1469	1956	718	843	1177	1566	1727	984	1922	997	1296	1176
ENSG00000051382	PIK3CB	protein_coding	P42338	101	193	70	180	191	176	187	253	347	445	256	469	220	319	327
ENSG00000051523	CYBA	protein_coding	P13498	314	512	206	691	810	215	279	330	649	983	841	1745	1217	1565	1395
ENSG00000051596	THOC3	protein_coding	Q96J01	560	804	273	467	499	675	720	702	850	1071	1000	2120	1017	1087	1043
ENSG00000051620	HEBP2	protein_coding	Q9Y5Z4	456	808	302	994	1167	565	620	803	1496	1951	1531	2848	1769	2556	2500
ENSG00000051825	MPHOSPH9	protein_coding	Q99550	766	1128	477	1191	1489	879	955	1399	1424	1711	1115	2225	952	1335	1229
ENSG00000052126	PLEKHA5	protein_coding	Q9HAU0	192	305	129	348	436	275	314	492	589	760	435	788	526	742	713
ENSG00000052344	PRSS8	protein_coding	Q16651	5	5	1	10	8	2	3	6	7	15	7	7	4	3	9
ENSG00000052723	SIKE1	protein_coding	Q9BRV8	298	491	212	736	901	549	536	915	1433	2012	1105	2098	1804	2462	2273
ENSG00000052749	RRP12	protein_coding	Q5JTH9	1399	2125	822	2328	2784	1045	1151	1578	2081	2563	1091	2079	1846	2637	2258
ENSG00000052795	FNIP2	protein_coding	Q9P278	92	102	40	158	198	105	131	173	219	255	93	190	141	204	206
ENSG00000052802	MSMO1	protein_coding	Q15800	234	345	174	602	609	711	724	1143	1909	2430	998	1910	1230	1763	1714
ENSG00000052841	TTC17	protein_coding	Q96AE7	296	396	171	602	780	315	324	513	732	873	406	895	446	681	660
ENSG00000052850	ALX4	protein_coding	Q9H161	57	82	38	102	131	52	74	86	129	157	63	155	64	115	116
ENSG00000053108	FSTL4	protein_coding	Q6MZW2	6	14	2	2	12	1	7	5	12	22	7	19	17	28	16
ENSG00000053254	FOXN3	protein_coding	O00409	122	150	77	198	247	145	115	201	213	272	110	274	126	181	112
ENSG00000053328	METTL24	protein_coding	Q5JXM2	7	9	4	9	3	11	3	4	14	8	6	22	9	15	14
ENSG00000053371	AKR7A2	protein_coding	O43488	304	460	160	448	522	315	366	474	675	928	668	1383	902	1154	1135
ENSG00000053372	MRTO4	protein_coding	Q9UKD2	1025	1624	655	2127	2712	1194	1183	1794	2987	3422	2815	5132	2804	3932	3996
ENSG00000053438	NNAT	protein_coding	Q16517	11	26	10	22	33	14	8	15	14	17	10	18	6	20	5
ENSG00000053501	USE1	protein_coding	Q9NZ43	177	286	108	427	480	211	180	280	398	509	495	779	513	797	693
ENSG00000053524	MCF2L2	protein_coding	Q86YR7	16	17	8	27	31	10	10	13	16	28	19	26	11	19	17
ENSG00000053702	NRIP2	protein_coding	Q9BQI9	3	6	1	20	15	7	7	10	9	9	5	13	5	6	9
ENSG00000053747	LAMA3	protein_coding	Q16787	285	389	151	484	620	242	268	420	436	547	251	472	263	370	374
ENSG00000053770	AP5M1	protein_coding	Q9H0R1	164	241	101	289	278	330	347	547	627	811	345	660	366	622	552
ENSG00000053900	ANAPC4	protein_coding	Q9UJX5	296	489	163	530	593	801	818	1131	1147	1300	924	1536	684	1042	958
ENSG00000053918	KCNQ1	protein_coding	P51787	11	4	4	11	19	3	2	9	4	10	7	16	7	10	7
ENSG00000054116	TRAPPC3	protein_coding	O43617	814	1169	512	1525	1564	1504	1529	2163	3494	3688	2571	4471	2696	3809	3923
ENSG00000054118	THRAP3	protein_coding	Q9Y2W1	1418	2442	971	2705	3148	1682	1832	2488	3603	4279	2498	4227	3106	4447	4860
ENSG00000054148	PHPT1	protein_coding	Q9NRX4	649	857	376	1849	1940	1054	1105	1475	3278	4001	1992	3803	2999	4345	4375
ENSG00000054179	ENTPD2	protein_coding	Q9Y5L3	5	3	1	6	9	1	5	5	2	5	1	5	5	4	4
ENSG00000054219	LY75	protein_coding	O60449	0	0	0	0	0	0	0	0	0	0	0	0	0	0	0
ENSG00000054267	ARID4B	protein_coding	Q4LE39	1443	2085	829	2468	2844	1636	1713	2568	3094	3658	2074	3989	2484	3287	3357
ENSG00000054277	OPN3	protein_coding	Q9H1Y3	4	9	0	2	4	5	7	2	4	10	7	13	4	9	5
ENSG00000054282	SDCCAG8	protein_coding	Q86SQ7	0	0	1	11	1	7	3	9	11	15	8	2	2	8	12
ENSG00000054356	PTPRN	protein_coding	Q16849	0	1	0	2	2	0	0	0	1	1	0	0	0	1	3
ENSG00000054392	HHAT	protein_coding	Q5VTY9	0	0	0	0	0	0	0	0	0	0	1	0	0	0	0
ENSG00000054523	KIF1B	protein_coding	O60333	1384	2079	962	2818	3635	1620	1745	2521	3610	4361	2611	4394	2858	4047	4000
ENSG00000054598	FOXC1	protein_coding	Q12948	1544	2149	956	3102	3748	1450	1550	2278	4109	5299	3347	5088	3585	5109	5119
ENSG00000054611	TBC1D22A	protein_coding	Q8WUA7	99	132	71	167	265	68	93	154	226	242	152	267	158	239	212
ENSG00000054654	SYNE2	protein_coding	Q8WXH0	450	771	335	964	1440	615	647	1010	1085	1418	485	1366	523	937	905
ENSG00000054690	PLEKHH1	protein_coding	Q9ULM0	279	383	139	538	712	171	175	279	350	428	172	390	216	377	324
ENSG00000054793	ATP9A	protein_coding	O75110	365	497	180	542	756	291	318	403	470	541	238	596	341	482	375
ENSG00000054796	SPO11	protein_coding	Q9Y5K1	0	0	0	0	0	0	0	0	0	0	0	0	0	0	0
ENSG00000054803	CBLN4	protein_coding	Q9NTU7	0	0	0	0	0	0	0	0	0	0	0	0	0	0	0
ENSG00000054938	CHRDL2	protein_coding	Q6WN34	3	1	1	5	3	2	2	5	4	4	4	9	1	0	2
ENSG00000054965	FAM168A	protein_coding	Q92567	190	268	101	348	479	219	247	345	473	635	240	623	317	365	377
ENSG00000054967	RELT	protein_coding	Q969Z4	154	191	66	222	258	53	69	104	143	168	87	212	87	161	157
ENSG00000054983	GALC	protein_coding	P54803	38	52	27	53	72	63	50	81	78	81	126	184	102	127	134
ENSG00000055044	NOP58	protein_coding	Q9Y2X3	1819	2903	1136	4087	4785	3372	3437	5026	7232	8724	5142	8815	5503	7968	7855
ENSG00000055070	SZRD1	protein_coding	#N/A	203	305	131	465	616	262	302	454	558	682	323	735	311	578	445
ENSG00000055118	KCNH2	protein_coding	Q12809	43	82	20	53	78	20	22	37	52	50	32	76	43	51	55
ENSG00000055130	CUL1	protein_coding	Q13616	1606	2926	1076	3008	3844	3567	3761	5330	7291	8223	5699	9133	5549	7430	7691
ENSG00000055147	FAM114A2	protein_coding	Q9NRY5	229	356	105	339	403	331	307	474	671	828	704	1301	685	913	894
ENSG00000055163	CYFIP2	protein_coding	Q96F07	636	992	342	1322	1832	787	800	1159	1580	2057	1008	1673	1202	1928	1713
ENSG00000055208	TAB2	protein_coding	Q9NYJ8	369	486	199	627	747	436	515	721	865	1165	661	1217	727	934	853
ENSG00000055211	GINM1	protein_coding	Q9NU53	191	279	110	296	384	399	391	658	824	981	594	980	590	960	908
ENSG00000055332	EIF2AK2	protein_coding	P19525	610	946	414	1180	1294	1267	1383	2080	2839	3582	1586	2662	2187	2888	3009
ENSG00000055483	USP36	protein_coding	Q9P275	1343	1903	803	2175	3167	993	1123	1654	1783	2157	1086	2294	1320	1847	1562
ENSG00000055609	KMT2C	protein_coding	Q8NEZ4	1298	1942	787	2401	3242	1079	1281	1986	2580	3101	1387	2876	1353	1854	1850
ENSG00000055732	MCOLN3	protein_coding	Q8TDD5	161	265	89	281	362	220	217	387	382	431	197	359	290	385	374
ENSG00000055813	CCDC85A	protein_coding	#N/A	0	1	0	0	1	0	0	1	1	0	0	1	1	0	1
ENSG00000055917	PUM2	protein_coding	Q8TB72	505	822	302	1151	1283	982	1014	1317	1994	2675	1488	2760	1483	1892	1962
ENSG00000055950	MRPL43	protein_coding	Q8N983	880	1521	666	1584	1849	1203	1215	1741	2366	2571	3180	5082	2449	3432	3263
ENSG00000055955	ITIH4	protein_coding	Q14624	1	3	1	3	13	1	1	6	5	3	1	6	1	1	1
ENSG00000055957	ITIH1	protein_coding	P19827	6	10	4	13	18	4	3	6	6	7	2	12	0	3	7
ENSG00000056050	HPF1	protein_coding	Q9NWY4	235	311	124	373	425	362	344	503	813	1128	511	1028	658	1000	985
ENSG00000056097	ZFR	protein_coding	Q96KR1	1637	2524	950	2490	2816	2171	2303	3314	4348	5277	3069	5397	3712	5021	5020
ENSG00000056277	ZNF280C	protein_coding	Q8ND82	492	838	357	937	1112	920	930	1380	1871	2272	1346	2402	1626	2290	2269
ENSG00000056291	NPFFR2	protein_coding	Q9Y5X5	2	3	0	9	3	3	3	6	7	9	2	1	3	4	11
ENSG00000056487	PHF21B	protein_coding	Q96EK2	185	210	67	164	217	49	73	89	80	105	49	122	88	102	74
ENSG00000056558	TRAF1	protein_coding	Q13077	33	45	14	43	66	14	12	19	27	34	15	42	37	36	28
ENSG00000056586	RC3H2	protein_coding	Q9HBD1	546	763	296	758	1060	544	647	927	1012	1312	769	1530	656	907	840
ENSG00000056736	IL17RB	protein_coding	Q9NRM6	103	161	63	196	279	102	109	141	217	251	207	351	163	230	234
ENSG00000056972	TRAF3IP2	protein_coding	O43734	55	77	31	84	89	55	69	96	108	128	67	171	101	129	110
ENSG00000056998	GYG2	protein_coding	O15488	87	154	46	119	146	81	101	147	166	280	149	283	180	279	261
ENSG00000057019	DCBLD2	protein_coding	Q96PD2	192	295	112	281	392	266	287	357	529	630	312	601	353	466	443
ENSG00000057149	SERPINB3	protein_coding	P29508	0	0	0	0	0	0	0	0	0	0	0	0	0	0	0
ENSG00000057252	SOAT1	protein_coding	P35610	1017	1844	602	1872	2172	2174	2139	3225	3602	4533	3612	6681	3375	4554	4371
ENSG00000057294	PKP2	protein_coding	Q99959	97	161	77	227	281	145	154	216	378	449	202	337	270	435	380
ENSG00000057468	MSH4	protein_coding	O15457	19	20	8	23	27	16	14	26	24	27	11	26	9	21	17
ENSG00000057593	F7	protein_coding	P08709	0	0	0	1	0	0	0	1	0	0	0	0	0	0	3
ENSG00000057608	GDI2	protein_coding	P50395	1379	2256	939	2966	3178	2560	2654	3622	5749	7239	3272	5857	4719	6203	6249
ENSG00000057657	PRDM1	protein_coding	O75626	2	3	0	3	10	5	0	7	9	2	1	6	8	7	3
ENSG00000057663	ATG5	protein_coding	Q9H1Y0	168	255	113	330	402	302	357	427	572	697	509	907	420	541	574
ENSG00000057704	TMCC3	protein_coding	Q9ULS5	32	41	12	43	59	30	38	45	49	86	61	110	69	96	72
ENSG00000057757	PITHD1	protein_coding	Q9GZP4	184	286	154	422	434	351	374	575	825	1073	507	998	569	865	794
ENSG00000057935	MTA3	protein_coding	Q9BTC8	244	329	148	371	486	376	373	572	865	1153	506	945	748	1041	992
ENSG00000058056	USP13	protein_coding	Q92995	146	223	79	366	399	237	264	383	591	834	314	525	366	596	594
ENSG00000058063	ATP11B	protein_coding	Q9Y2G3	163	249	108	278	340	315	304	504	569	593	260	544	222	352	325
ENSG00000058085	LAMC2	protein_coding	Q13753	10	22	4	24	51	10	25	17	27	29	30	47	32	59	44
ENSG00000058091	CDK14	protein_coding	O94921	41	68	18	89	91	76	71	133	178	211	92	143	92	141	124
ENSG00000058262	SEC61A1	protein_coding	P61619	1693	2663	1061	3247	3981	1645	1797	2752	3826	4928	3483	6555	3534	4988	4756
ENSG00000058272	PPP1R12A	protein_coding	O14974	917	1436	594	1624	2069	1239	1245	1828	2569	3147	1670	3140	2391	3256	3205
ENSG00000058335	RASGRF1	protein_coding	Q13972	6	1	0	9	12	0	2	1	4	4	1	10	4	6	5
ENSG00000058404	CAMK2B	protein_coding	Q13554	50	58	28	90	116	24	27	45	91	87	30	88	44	80	60
ENSG00000058453	CROCC	protein_coding	Q5TZA2	103	155	51	250	299	53	68	112	158	193	70	181	109	198	156
ENSG00000058600	POLR3E	protein_coding	Q9NVU0	657	864	373	1267	1562	483	500	749	1190	1397	801	1511	872	1341	1173
ENSG00000058668	ATP2B4	protein_coding	P23634	490	798	308	913	1048	601	651	894	1058	1285	885	1410	885	1381	1289
ENSG00000058673	ZC3H11A	protein_coding	O75152	319	548	207	765	859	569	596	1273	1228	1594	783	1499	822	1213	1299
ENSG00000058729	RIOK2	protein_coding	Q9BVS4	610	918	407	905	1042	1402	1555	2048	2414	3017	1863	3320	2165	2980	3166
ENSG00000058799	YIPF1	protein_coding	Q9Y548	77	130	53	202	203	135	113	178	251	371	190	420	254	341	282
ENSG00000058804	NDC1	protein_coding	Q9BTX1	653	883	319	888	936	972	1063	1637	1788	2247	1111	2336	1301	1810	1708
ENSG00000058866	DGKG	protein_coding	P49619	3	1	0	2	2	1	0	0	1	3	1	4	1	2	3
ENSG00000059122	FLYWCH1	protein_coding	Q4VC44	538	1006	365	1075	1475	339	414	527	704	776	726	1330	651	908	905
ENSG00000059145	UNKL	protein_coding	Q9H9P5	280	368	153	470	579	133	139	189	304	376	222	508	219	311	277
ENSG00000059377	TBXAS1	protein_coding	P24557	13	13	8	47	52	12	18	25	37	48	27	62	24	42	53
ENSG00000059378	PARP12	protein_coding	Q9H0J9	2	3	2	6	14	5	2	9	2	7	0	7	2	3	1
ENSG00000059573	ALDH18A1	protein_coding	P54886	1430	2562	787	2201	2522	1912	1921	2580	3340	4356	2398	4326	3428	4618	4399
ENSG00000059588	TARBP1	protein_coding	Q13395	959	1299	536	1879	2351	1156	1215	1723	2455	2593	1139	2331	1517	2086	1903
ENSG00000059691	GATB	protein_coding	O75879	207	358	114	406	450	251	318	386	610	847	475	876	565	757	698
ENSG00000059728	MXD1	protein_coding	Q05195	158	257	90	428	481	172	186	307	351	442	224	576	445	658	598
ENSG00000059758	CDK17	protein_coding	Q00537	141	313	122	287	323	336	338	438	595	798	425	676	431	604	658
ENSG00000059769	DNAJC25	protein_coding	Q9H1X3	470	599	225	511	662	179	211	288	257	303	294	777	259	320	336
ENSG00000059804	SLC2A3	protein_coding	P11169	55	57	27	49	54	33	51	79	67	103	80	196	89	137	108
ENSG00000059915	PSD	protein_coding	A5PKW4	45	60	11	66	79	20	22	35	28	40	29	53	36	41	28
ENSG00000060069	CTDP1	protein_coding	Q9Y5B0	68	84	46	118	172	39	36	61	92	125	66	105	79	78	87
ENSG00000060138	YBX3	protein_coding	P16989	1998	3234	1413	3410	4188	2353	2620	3579	4269	5768	3471	6525	5746	7332	6637
ENSG00000060140	STYK1	protein_coding	Q6J9G0	5	9	2	6	12	11	11	14	9	12	5	17	14	14	15
ENSG00000060237	WNK1	protein_coding	Q9H4A3	1309	2027	796	2612	3304	1594	1764	2639	3885	5068	2248	4042	3032	4205	3908
ENSG00000060303	RPS17P5	processed_pseudogene	#N/A	2	4	0	2	4	5	4	5	5	13	5	7	5	11	10
ENSG00000060339	CCAR1	protein_coding	Q8IX12	2524	3439	1554	4801	5018	3218	3140	4872	6670	8147	4099	7195	4985	7507	7263
ENSG00000060491	OGFR	protein_coding	Q9NZT2	299	471	195	766	956	231	301	457	656	818	560	877	554	772	796
ENSG00000060558	GNA15	protein_coding	P30679	1	1	2	1	2	0	0	0	0	1	0	0	0	0	3
ENSG00000060566	CREB3L3	protein_coding	Q68CJ9	0	0	0	0	1	0	0	0	2	0	0	5	0	2	0
ENSG00000060642	PIGV	protein_coding	Q9NUD9	67	93	34	111	125	77	98	136	138	182	139	238	87	170	115
ENSG00000060656	PTPRU	protein_coding	Q92729	623	887	352	1154	1499	294	359	556	723	858	575	1130	483	813	681
ENSG00000060688	SNRNP40	protein_coding	Q96DI7	732	1077	440	1717	1747	1279	1418	1898	3250	4112	2362	4712	2961	4033	3892
ENSG00000060709	RIMBP2	protein_coding	O15034	1	0	0	0	1	0	2	2	1	4	0	3	0	0	0
ENSG00000060718	COL11A1	protein_coding	P12107	0	3	0	0	1	2	0	2	0	1	0	0	1	1	2
ENSG00000060749	QSER1	protein_coding	#N/A	365	585	213	660	847	682	810	1138	1588	1923	819	1347	921	1359	1320
ENSG00000060762	MPC1	protein_coding	Q9Y5U8	191	369	145	428	519	497	461	715	1002	1332	713	1532	928	1175	1241
ENSG00000060971	ACAA1	protein_coding	P09110	1982	3110	918	2225	2774	988	1103	1457	1823	2137	2997	5511	2713	3387	3140
ENSG00000060982	BCAT1	protein_coding	P54687	404	693	268	755	900	761	698	996	1689	2179	1166	1988	1627	2236	2196
ENSG00000061273	HDAC7	protein_coding	Q8WUI4	324	553	194	483	744	175	194	221	273	370	257	535	248	340	295
ENSG00000061337	LZTS1	protein_coding	Q9Y250	5	8	10	12	24	14	8	8	26	24	16	20	8	15	19
ENSG00000061455	PRDM6	protein_coding	Q9NQX0	52	91	34	103	139	46	62	98	136	170	66	129	96	120	129
ENSG00000061492	WNT8A	protein_coding	Q9H1J5	2	0	0	0	1	0	0	0	1	2	1	0	0	1	1
ENSG00000061656	SPAG4	protein_coding	Q9NPE6	20	34	17	56	51	27	23	23	53	44	23	86	25	52	40
ENSG00000061676	NCKAP1	protein_coding	Q9Y2A7	1685	2982	952	2392	3051	2016	2249	3006	3978	4560	3023	5691	4057	5185	4825
ENSG00000061794	MRPS35	protein_coding	P82673	330	533	265	731	776	683	731	1009	1768	2165	1275	2124	1509	2128	2094
ENSG00000061918	GUCY1B3	protein_coding	#N/A	164	275	97	372	381	227	224	343	597	791	504	818	485	778	759
ENSG00000061936	SFSWAP	protein_coding	Q12872	599	888	360	1101	1362	504	571	856	1149	1570	856	1730	979	1350	1413
ENSG00000061938	TNK2	protein_coding	Q07912	493	769	311	803	1032	186	166	281	370	425	370	738	307	402	357
ENSG00000061987	MON2	protein_coding	Q7Z3U7	339	575	222	888	1077	591	563	827	1388	1696	675	1124	899	1231	1084
ENSG00000062038	CDH3	protein_coding	P22223	11	11	4	6	7	9	6	13	9	14	17	13	6	16	20
ENSG00000062096	ARSF	protein_coding	P54793	0	1	0	0	0	0	0	0	0	0	0	0	0	0	0
ENSG00000062194	GPBP1	protein_coding	Q86WP2	1001	1464	595	2383	2885	1136	1251	1769	2283	2555	2113	3991	1886	2678	2552
ENSG00000062282	DGAT2	protein_coding	Q96PD7	20	22	17	28	41	11	15	24	29	27	24	62	21	47	60
ENSG00000062370	ZNF112	protein_coding	Q9UJU3	6	19	3	15	20	21	22	32	37	50	15	40	21	32	37
ENSG00000062485	CS	protein_coding	O75390	1513	2476	802	2409	2798	2261	2243	2954	4360	6028	3109	5990	4224	5746	5562
ENSG00000062524	LTK	protein_coding	P29376	30	39	18	27	51	10	18	23	27	41	23	44	23	46	31
ENSG00000062582	MRPS24	protein_coding	Q96EL2	16	18	4	37	29	17	20	8	26	44	37	75	36	50	28
ENSG00000062598	ELMO2	protein_coding	Q96JJ3	411	573	208	768	847	435	455	580	904	1013	888	1698	993	1239	1218
ENSG00000062650	WAPL	protein_coding	Q7Z5K2	1486	2140	832	2631	2938	2235	2451	3330	4662	5762	3306	6208	3472	4712	4648
ENSG00000062716	VMP1	protein_coding	Q96GC9	1329	2695	897	2713	3338	4550	4978	7100	7945	8380	5316	9942	5303	7679	7313
ENSG00000062725	APPBP2	protein_coding	Q92624	477	861	323	973	1192	883	921	1336	1812	2343	2068	3272	2244	2505	2665
ENSG00000062822	POLD1	protein_coding	P28340	625	943	348	1009	1303	365	409	524	939	1018	697	1120	884	1210	1229
ENSG00000063015	SEZ6	protein_coding	Q53EL9	1	5	0	8	12	5	6	1	7	3	1	7	0	0	8
ENSG00000063046	EIF4B	protein_coding	P23588	262	456	206	618	663	350	337	537	1089	1538	643	1106	1342	1742	1811
ENSG00000063127	SLC6A16	protein_coding	Q9GZN6	49	93	30	83	92	29	36	53	57	50	52	95	37	39	37
ENSG00000063169	GLTSCR1	protein_coding	#N/A	275	341	139	506	642	138	201	265	369	449	226	433	226	371	324
ENSG00000063176	SPHK2	protein_coding	Q9NRA0	227	283	112	304	467	101	112	163	194	226	158	296	150	220	197
ENSG00000063177	RPL18	protein_coding	Q07020	3146	4836	1606	5763	6669	2167	2286	2728	5672	7987	7625	16110	8796	11428	11710
ENSG00000063180	CA11	protein_coding	O75493	104	134	38	141	173	56	61	76	139	179	140	259	133	167	168
ENSG00000063241	ISOC2	protein_coding	Q96AB3	208	292	139	330	405	151	171	244	395	605	311	748	436	564	495
ENSG00000063244	U2AF2	protein_coding	P26368	2967	4768	1759	6481	7385	3073	3257	4191	7981	10671	6526	11778	9551	13433	13145
ENSG00000063245	EPN1	protein_coding	Q9Y6I3	658	943	395	1355	1799	457	439	652	913	1081	655	1295	750	1067	892
ENSG00000063322	MED29	protein_coding	Q9NX70	202	353	165	391	446	278	313	528	664	915	621	1072	581	860	833
ENSG00000063438	AHRR	protein_coding	A9YTQ3	249	334	120	433	582	171	193	285	381	423	240	539	272	469	372
ENSG00000063515	GSC2	protein_coding	O15499	0	1	1	2	2	6	0	1	1	0	0	0	0	0	1
ENSG00000063587	ZNF275	protein_coding	Q9NSD4	264	356	164	488	692	235	293	409	607	751	255	599	273	514	452
ENSG00000063601	MTMR1	protein_coding	Q13613	479	735	251	1037	1309	473	534	843	1340	1743	1082	1994	1466	1991	1845
ENSG00000063660	GPC1	protein_coding	P35052	334	506	162	696	683	259	257	380	563	625	601	949	454	657	534
ENSG00000063761	ADCK1	protein_coding	Q86TW2	162	234	102	344	467	163	133	212	343	426	274	468	270	416	358
ENSG00000063854	HAGH	protein_coding	Q16775	485	622	239	723	843	215	218	319	549	755	523	1151	788	1157	972
ENSG00000063978	RNF4	protein_coding	P78317	282	427	201	600	719	341	355	530	707	861	686	1226	594	806	742
ENSG00000064012	CASP8	protein_coding	Q14790	132	236	78	228	277	225	247	317	463	557	427	650	543	736	701
ENSG00000064042	LIMCH1	protein_coding	Q9UPQ0	30	57	18	60	99	34	28	58	58	103	27	105	41	56	84
ENSG00000064102	ASUN	protein_coding	#N/A	1078	1572	700	2081	2501	1665	1706	2486	3390	4135	1948	3568	2525	3267	3294
ENSG00000064115	TM7SF3	protein_coding	Q9NS93	174	296	126	314	348	221	229	373	451	580	316	706	404	550	439
ENSG00000064195	DLX3	protein_coding	O60479	6	10	0	7	5	7	3	6	5	9	13	21	2	9	13
ENSG00000064199	SPA17	protein_coding	Q15506	36	55	28	62	61	72	75	135	200	247	138	168	124	224	165
ENSG00000064201	TSPAN32	protein_coding	Q96QS1	0	0	1	1	1	0	0	0	1	2	0	2	1	0	0
ENSG00000064205	WISP2	protein_coding	O76076	0	3	0	6	4	0	1	0	1	6	1	4	0	3	2
ENSG00000064218	DMRT3	protein_coding	Q9NQL9	8	9	1	7	6	10	13	10	16	17	12	15	15	15	17
ENSG00000064225	ST3GAL6	protein_coding	Q9Y274	59	73	33	146	130	57	68	114	142	162	125	245	128	156	163
ENSG00000064270	ATP2C2	protein_coding	O75185	4	3	1	8	13	1	2	3	4	5	0	1	2	5	7
ENSG00000064300	NGFR	protein_coding	P08138	6	19	4	7	21	6	3	7	5	10	4	13	7	23	19
ENSG00000064309	CDON	protein_coding	Q4KMG0	328	451	183	501	622	324	355	571	640	748	536	907	481	625	620
ENSG00000064313	TAF2	protein_coding	Q6P1X5	526	803	311	925	1073	761	787	1227	1574	2022	837	1816	1122	1642	1582
ENSG00000064393	HIPK2	protein_coding	Q9H2X6	725	1074	380	1435	1810	629	717	969	1198	1686	610	1348	728	899	806
ENSG00000064419	TNPO3	protein_coding	Q9Y5L0	806	1152	495	1496	1671	1033	1040	1469	2298	2826	1575	3080	1520	2141	1931
ENSG00000064489	BORCS8-MEF2B	protein_coding	H3BNR1	0	0	0	0	0	0	0	0	0	0	0	0	0	0	0
ENSG00000064490	RFXANK	protein_coding	O14593	147	275	85	247	361	141	152	144	265	360	327	575	364	534	447
ENSG00000064545	TMEM161A	protein_coding	Q9NX61	998	1391	540	1554	2064	522	567	773	1040	1345	1156	2409	1315	1816	1658
ENSG00000064547	LPAR2	protein_coding	Q9HBW0	31	24	11	56	71	15	23	16	38	38	22	44	29	37	22
ENSG00000064601	CTSA	protein_coding	P10619	236	349	130	438	535	225	209	343	520	653	411	746	527	857	769
ENSG00000064607	SUGP2	protein_coding	Q8IX01	1527	2099	880	2455	3155	1283	1329	1980	2459	2930	1610	3192	1927	2654	2546
ENSG00000064651	SLC12A2	protein_coding	P55011	369	616	209	777	856	683	755	1012	1351	1731	751	1382	1069	1436	1452
ENSG00000064652	SNX24	protein_coding	Q9Y343	18	40	10	38	37	23	34	62	62	85	40	68	44	66	55
ENSG00000064655	EYA2	protein_coding	O00167	47	54	24	105	113	52	44	75	128	151	62	123	93	118	127
ENSG00000064666	CNN2	protein_coding	Q99439	193	347	118	344	363	258	300	356	517	750	550	969	614	861	810
ENSG00000064687	ABCA7	protein_coding	Q8IZY2	190	307	110	383	458	85	94	134	227	259	166	339	202	246	239
ENSG00000064692	SNCAIP	protein_coding	Q9Y6H5	31	28	15	22	36	15	7	29	27	23	14	49	14	27	26
ENSG00000064703	DDX20	protein_coding	Q9UHI6	748	1180	502	1789	1924	1524	1716	2547	4105	4799	2392	3984	2930	3945	4155
ENSG00000064726	BTBD1	protein_coding	Q9H0C5	884	1381	542	1582	1930	843	932	1455	1822	2436	1467	2882	1827	2496	2298
ENSG00000064763	FAR2	protein_coding	Q96K12	262	464	118	397	465	378	348	484	802	916	604	1042	654	912	905
ENSG00000064787	BCAS1	protein_coding	O75363	1	1	2	2	0	1	0	5	2	2	2	8	4	4	3
ENSG00000064835	POU1F1	protein_coding	P28069	0	0	0	0	0	0	3	0	0	0	0	0	0	0	0
ENSG00000064886	CHI3L2	protein_coding	Q15782	0	0	1	0	0	5	0	0	2	0	0	1	0	0	0
ENSG00000064932	SBNO2	protein_coding	Q9Y2G9	7	6	1	19	8	2	4	5	12	16	6	23	7	4	7
ENSG00000064933	PMS1	protein_coding	P54277	261	488	161	531	630	423	509	799	1021	1299	527	853	744	1090	963
ENSG00000064961	HMG20B	protein_coding	Q9P0W2	187	262	131	460	469	147	160	229	430	510	237	506	309	415	379
ENSG00000064989	CALCRL	protein_coding	Q16602	7	12	2	8	6	14	15	13	20	17	15	43	9	32	19
ENSG00000064995	TAF11	protein_coding	Q15544	149	261	80	301	382	217	207	304	421	480	395	743	347	433	507
ENSG00000064999	ANKS1A	protein_coding	Q92625	434	670	284	865	1026	320	412	578	968	1136	689	1252	693	1069	984
ENSG00000065000	AP3D1	protein_coding	O14617	3441	5008	1980	5597	7713	2337	2460	3583	4656	5841	2851	6112	3157	4701	4211
ENSG00000065029	ZNF76	protein_coding	P36508	224	355	158	315	580	149	143	250	262	258	157	363	188	270	229
ENSG00000065054	SLC9A3R2	protein_coding	Q15599	253	362	123	518	604	226	284	453	545	573	309	590	353	499	468
ENSG00000065057	NTHL1	protein_coding	P78549	248	446	174	469	491	291	348	358	752	948	695	1282	858	1059	1053
ENSG00000065060	UHRF1BP1	protein_coding	Q6BDS2	339	457	184	602	809	340	338	520	677	902	337	731	434	615	564
ENSG00000065135	GNAI3	protein_coding	P08754	828	1311	503	1856	2123	1745	1891	2703	3908	4480	2536	4467	2648	4189	3821
ENSG00000065150	IPO5	protein_coding	O00410	5520	9538	3777	14938	17160	9234	9875	13035	19872	25142	21463	32562	19379	26412	22453
ENSG00000065154	OAT	protein_coding	P04181	2991	4903	1612	5253	6180	4037	4242	5626	8760	10530	9035	16365	11105	13868	13584
ENSG00000065183	WDR3	protein_coding	Q9UNX4	1175	1955	702	2473	2507	1921	2066	2922	5123	5759	2497	3991	4388	5989	6248
ENSG00000065243	PKN2	protein_coding	Q16513	696	1007	389	1413	1714	1162	1265	1921	2816	3344	1553	2619	1858	2675	2707
ENSG00000065268	WDR18	protein_coding	Q9BV38	383	725	250	831	1074	537	521	832	1236	1537	928	1638	1107	1614	1550
ENSG00000065308	TRAM2	protein_coding	Q15035	155	268	103	332	355	102	100	124	208	254	230	533	239	316	271
ENSG00000065320	NTN1	protein_coding	O95631	214	302	112	383	433	158	169	236	299	520	216	384	287	410	343
ENSG00000065325	GLP2R	protein_coding	O95838	0	3	0	0	0	0	0	0	0	0	0	1	0	0	0
ENSG00000065328	MCM10	protein_coding	Q7L590	2270	3509	1370	4629	5501	2581	2911	3930	5700	6924	5671	8754	6077	8573	8480
ENSG00000065357	DGKA	protein_coding	P23743	79	116	43	117	153	93	93	130	184	237	138	198	202	244	286
ENSG00000065361	ERBB3	protein_coding	P21860	58	91	45	122	124	87	73	115	150	162	83	173	83	124	118
ENSG00000065371	ROPN1	protein_coding	Q9HAT0	0	0	1	0	0	0	0	0	0	2	0	1	0	0	0
ENSG00000065413	ANKRD44	protein_coding	Q8N8A2	4	9	2	14	9	2	6	7	5	15	6	4	9	18	10
ENSG00000065427	KARS	protein_coding	Q15046	1277	2142	842	2428	2770	1929	1945	2759	4607	5990	3698	6729	4711	6532	6269
ENSG00000065457	ADAT1	protein_coding	Q9BUB4	192	223	107	319	357	223	229	336	385	461	220	433	272	379	286
ENSG00000065485	PDIA5	protein_coding	Q14554	222	428	139	461	576	341	322	422	627	816	537	1111	778	1128	1049
ENSG00000065491	TBC1D22B	protein_coding	Q9NU19	210	261	109	346	474	209	228	329	375	416	270	582	220	304	296
ENSG00000065518	NDUFB4	protein_coding	O95168	389	665	229	841	920	410	379	508	1082	1733	1465	2620	1497	2262	2270
ENSG00000065526	SPEN	protein_coding	Q96T58	7152	13169	4300	10888	14873	4726	5455	8032	8016	9296	8375	19788	5624	7167	7524
ENSG00000065534	MYLK	protein_coding	Q15746	62	120	55	105	136	65	61	95	142	136	102	204	101	134	155
ENSG00000065548	ZC3H15	protein_coding	Q8WU90	978	1619	618	1997	2301	2072	2121	3170	4257	5445	3267	5917	3454	5327	5063
ENSG00000065559	MAP2K4	protein_coding	P45985	135	223	84	250	329	270	278	437	531	781	356	692	397	585	537
ENSG00000065600	TMEM206	protein_coding	Q9H813	223	297	107	366	409	185	217	255	419	525	353	764	411	562	543
ENSG00000065609	SNAP91	protein_coding	O60641	41	82	35	75	89	55	58	109	90	96	53	135	98	109	92
ENSG00000065613	SLK	protein_coding	Q9H2G2	1880	2678	912	3255	3201	2439	2629	3806	5120	6131	3502	6109	4440	5547	5852
ENSG00000065615	CYB5R4	protein_coding	Q7L1T6	71	54	30	98	119	110	128	182	274	382	161	251	206	294	292
ENSG00000065618	COL17A1	protein_coding	Q9UMD9	2	9	2	0	1	0	0	2	3	1	4	7	3	3	3
ENSG00000065621	GSTO2	protein_coding	Q9H4Y5	24	33	13	44	30	23	15	28	45	63	33	83	50	75	71
ENSG00000065665	SEC61A2	protein_coding	Q9H9S3	262	434	164	424	528	508	471	708	763	996	694	1242	675	1024	975
ENSG00000065675	PRKCQ	protein_coding	Q04759	89	115	59	193	184	124	114	186	408	430	430	580	378	457	437
ENSG00000065717	TLE2	protein_coding	Q04725	64	133	50	117	171	41	36	63	64	87	53	132	83	106	86
ENSG00000065802	ASB1	protein_coding	Q9Y576	237	331	130	474	589	166	180	248	332	409	202	470	259	409	322
ENSG00000065809	FAM107B	protein_coding	#N/A	126	164	74	215	218	162	173	257	346	482	237	413	238	357	383
ENSG00000065833	ME1	protein_coding	P48163	379	578	218	573	564	416	503	595	803	1050	828	1572	997	1300	1127
ENSG00000065882	TBC1D1	protein_coding	Q86TI0	132	246	76	234	364	126	112	173	246	283	194	349	209	292	269
ENSG00000065883	CDK13	protein_coding	Q14004	404	596	264	923	1107	522	586	887	1350	1551	611	1216	698	966	983
ENSG00000065911	MTHFD2	protein_coding	P13995	718	1299	409	1429	1722	1173	1299	2267	2893	3746	2768	5063	3563	4970	4771
ENSG00000065923	SLC9A7	protein_coding	Q96T83	176	229	85	305	370	262	270	352	412	508	456	766	328	473	487
ENSG00000065970	FOXJ2	protein_coding	Q9P0K8	142	245	93	262	347	163	193	213	284	342	429	667	291	440	398
ENSG00000065978	YBX1	protein_coding	P67809	876	1551	674	1758	2384	939	1036	1803	2357	3413	1995	4076	2529	3597	3200
ENSG00000065989	PDE4A	protein_coding	P27815	72	101	48	165	215	47	42	74	107	129	37	108	59	100	101
ENSG00000066027	PPP2R5A	protein_coding	Q15172	406	631	168	874	1010	387	370	553	917	1006	1156	1990	1153	1295	1246
ENSG00000066032	CTNNA2	protein_coding	P26232	1	0	0	2	0	0	0	0	1	0	0	2	1	0	0
ENSG00000066044	ELAVL1	protein_coding	Q15717	2116	3161	1242	4073	4423	2689	2774	3698	6408	9240	5284	9710	6882	9294	9036
ENSG00000066056	TIE1	protein_coding	P35590	0	3	0	0	1	1	1	0	4	0	0	0	0	1	0
ENSG00000066084	DIP2B	protein_coding	Q9P265	580	994	399	1203	1522	842	930	1275	1879	2353	1623	2370	1799	2419	2512
ENSG00000066117	SMARCD1	protein_coding	Q96GM5	746	1165	480	1500	1757	759	768	1149	1713	2285	1751	3211	2011	2808	2749
ENSG00000066135	KDM4A	protein_coding	O75164	720	1226	470	1500	1834	822	991	1461	2261	2485	1408	2357	1470	2123	2143
ENSG00000066136	NFYC	protein_coding	Q13952	213	281	142	347	469	338	315	476	708	1007	536	942	577	882	949
ENSG00000066185	ZMYND12	protein_coding	Q9H0C1	2	10	4	5	8	2	3	4	9	6	3	11	4	8	11
ENSG00000066230	SLC9A3	protein_coding	P48764	28	45	17	77	106	13	12	20	30	61	27	77	46	58	42
ENSG00000066248	NGEF	protein_coding	Q8N5V2	89	145	43	128	179	93	93	119	127	186	198	356	149	176	165
ENSG00000066279	ASPM	protein_coding	Q8IZT6	514	843	382	1074	1097	942	1060	1702	2155	2430	847	1597	1168	1523	1611
ENSG00000066294	CD84	protein_coding	Q9UIB8	0	0	0	0	0	0	0	1	0	1	0	0	0	0	0
ENSG00000066322	ELOVL1	protein_coding	Q9BW60	370	586	183	681	798	305	296	425	812	1008	928	1840	957	1300	1163
ENSG00000066336	SPI1	protein_coding	P17947	3	2	1	4	12	0	1	2	2	6	2	4	1	0	4
ENSG00000066379	ZNRD1	protein_coding	Q9P1U0	1	0	0	1	0	0	0	0	0	1	2	2	1	0	2
ENSG00000066382	MPPED2	protein_coding	Q15777	13	21	7	23	26	11	22	24	31	35	18	48	19	32	15
ENSG00000066405	CLDN18	protein_coding	P56856	3	4	2	8	7	3	3	2	8	12	6	14	2	5	3
ENSG00000066422	ZBTB11	protein_coding	O95625	341	603	189	604	713	570	591	846	1129	1532	654	1091	946	1196	1194
ENSG00000066427	ATXN3	protein_coding	P54252	197	325	124	374	433	260	296	386	515	599	468	798	434	629	557
ENSG00000066455	GOLGA5	protein_coding	Q8TBA6	331	481	208	572	652	540	555	776	1018	1264	1316	2016	883	1153	1215
ENSG00000066468	FGFR2	protein_coding	P21802	153	234	82	251	352	221	220	338	496	575	223	497	279	335	339
ENSG00000066557	LRRC40	protein_coding	Q9H9A6	1069	1771	650	1755	2259	1869	2070	2940	3775	4362	2586	4653	3310	4633	4540
ENSG00000066583	ISOC1	protein_coding	Q96CN7	262	479	128	628	703	268	260	348	636	822	607	1094	857	1139	1022
ENSG00000066629	EML1	protein_coding	O00423	133	195	78	235	315	162	181	220	312	363	210	424	233	311	339
ENSG00000066651	TRMT11	protein_coding	Q7Z4G4	155	177	85	315	408	312	317	505	780	970	312	666	475	691	755
ENSG00000066654	THUMPD1	protein_coding	Q9NXG2	261	360	133	497	566	325	355	544	761	1043	625	1253	672	934	904
ENSG00000066697	MSANTD3	protein_coding	Q96H12	50	80	32	70	94	108	96	165	204	289	98	198	110	190	183
ENSG00000066735	KIF26A	protein_coding	Q9ULI4	136	205	74	239	324	89	87	141	185	262	108	250	75	138	146
ENSG00000066739	ATG2B	protein_coding	Q96BY7	407	574	235	681	861	519	558	847	1021	1347	547	1144	750	935	885
ENSG00000066777	ARFGEF1	protein_coding	Q9Y6D6	329	537	230	567	658	576	634	901	1147	1417	596	1039	668	894	870
ENSG00000066813	ACSM2B	protein_coding	Q68CK6	0	0	0	0	0	0	0	0	0	0	0	0	1	0	0
ENSG00000066827	ZFAT	protein_coding	Q9P243	103	138	46	190	199	75	65	123	216	234	124	234	177	247	232
ENSG00000066855	MTFR1	protein_coding	Q15390	174	217	78	286	309	254	262	375	456	573	338	621	414	561	538
ENSG00000066923	STAG3	protein_coding	Q9UJ98	6	11	5	24	21	8	10	7	28	17	11	13	9	13	12
ENSG00000066926	FECH	protein_coding	P22830	190	272	117	338	353	190	190	302	383	521	367	683	469	752	662
ENSG00000066933	MYO9A	protein_coding	B2RTY4	676	880	367	1136	1525	479	523	756	984	1181	677	1539	630	829	770
ENSG00000067048	DDX3Y	protein_coding	O15523	2	2	1	6	6	5	9	3	7	12	5	18	18	15	8
ENSG00000067057	PFKP	protein_coding	Q01813	499	705	288	1094	1448	507	592	718	1304	2009	864	1467	1134	1589	1492
ENSG00000067064	IDI1	protein_coding	Q13907	519	804	273	1033	1191	1069	1109	1560	3086	3629	2155	3950	3147	3987	4074
ENSG00000067066	SP100	protein_coding	P23497	0	1	0	1	2	0	1	1	2	0	4	1	3	3	0
ENSG00000067082	KLF6	protein_coding	Q99612	595	785	317	735	965	473	504	727	752	1010	732	1574	968	1337	1242
ENSG00000067113	PLPP1	protein_coding	O14494	107	180	51	161	221	67	70	105	166	205	232	429	245	297	286
ENSG00000067141	NEO1	protein_coding	Q92859	495	785	269	832	1002	619	630	984	1303	1665	1207	2067	1419	1929	2000
ENSG00000067167	TRAM1	protein_coding	Q15629	927	1508	512	1483	1753	1477	1859	2642	2546	3292	2336	4522	2560	3294	3025
ENSG00000067177	PHKA1	protein_coding	P46020	350	464	168	665	751	455	522	702	1079	1451	537	901	731	1052	906
ENSG00000067182	TNFRSF1A	protein_coding	P19438	256	402	140	437	520	331	341	369	595	806	504	1029	474	736	641
ENSG00000067191	CACNB1	protein_coding	Q02641	74	129	58	109	158	38	44	60	39	71	49	94	42	80	55
ENSG00000067208	EVI5	protein_coding	O60447	309	416	210	686	816	387	352	567	640	797	449	855	438	600	585
ENSG00000067221	STOML1	protein_coding	Q9UBI4	109	132	48	128	151	72	62	77	96	152	64	176	107	140	112
ENSG00000067225	PKM	protein_coding	P14618	33354	55122	18575	54200	60333	44153	49626	61557	72487	72159	87045	136862	84549	99311	100401
ENSG00000067248	DHX29	protein_coding	Q7Z478	546	936	359	1011	1043	1061	1121	1660	2003	2364	890	1737	1621	1978	2182
ENSG00000067334	DNTTIP2	protein_coding	Q5QJE6	1520	2334	888	2875	3234	2242	2318	3255	4787	5671	5537	9257	7745	8457	9234
ENSG00000067365	METTL22	protein_coding	Q9BUU2	295	366	137	553	697	130	139	223	240	256	207	435	203	296	246
ENSG00000067369	TP53BP1	protein_coding	Q12888	918	1320	487	1436	1628	1482	1504	2063	2843	3586	1634	3182	2493	3188	2969
ENSG00000067445	TRO	protein_coding	Q12816	197	256	115	356	431	221	273	398	450	588	246	460	348	546	506
ENSG00000067533	RRP15	protein_coding	Q9Y3B9	525	846	309	1149	1174	1227	1232	1754	2836	3420	1756	3143	2055	3081	3043
ENSG00000067560	RHOA	protein_coding	P61586	4770	7450	3074	9888	11461	5238	5437	7134	13131	15325	16864	28055	14963	20955	20875
ENSG00000067596	DHX8	protein_coding	Q14562	840	1376	566	1873	2126	1105	1305	1814	2849	3636	2249	3427	3311	4438	4514
ENSG00000067601	PMS2P4	transcribed_unprocessed_pseudogene	#N/A	39	61	31	54	72	28	32	46	70	82	50	129	68	72	64
ENSG00000067606	PRKCZ	protein_coding	Q05513	265	370	118	689	979	145	136	173	277	386	240	453	328	454	403
ENSG00000067646	ZFY	protein_coding	P08048	1	2	0	0	2	2	0	1	7	3	37	7	5	9	2
ENSG00000067704	IARS2	protein_coding	Q9NSE4	1102	1681	674	1619	2019	2413	2182	3756	3268	4552	2511	4785	3382	4745	4689
ENSG00000067715	SYT1	protein_coding	P21579	95	175	60	186	215	93	100	130	162	246	280	472	249	359	313
ENSG00000067798	NAV3	protein_coding	Q8IVL0	7	10	0	11	10	1	5	2	4	1	6	15	2	5	8
ENSG00000067829	IDH3G	protein_coding	P51553	277	400	166	545	595	440	483	569	1067	1292	744	1373	992	1283	1321
ENSG00000067836	ROGDI	protein_coding	Q9GZN7	98	149	53	135	181	79	82	84	109	146	134	244	128	149	163
ENSG00000067840	PDZD4	protein_coding	Q76G19	87	114	48	163	177	39	52	67	81	97	51	145	65	84	89
ENSG00000067842	ATP2B3	protein_coding	Q16720	11	15	6	21	26	9	5	23	11	8	12	32	8	12	9
ENSG00000067900	ROCK1	protein_coding	Q13464	927	1418	609	1840	2107	1389	1491	2215	2871	3444	1707	3352	2002	2627	2426
ENSG00000067955	CBFB	protein_coding	Q13951	284	408	182	609	697	505	481	665	1017	1444	1062	1621	1119	1560	1557
ENSG00000067992	PDK3	protein_coding	Q15120	236	406	162	475	570	433	448	668	873	1163	494	1130	797	1040	1059
ENSG00000068001	HYAL2	protein_coding	Q12891	161	200	98	200	263	112	96	175	205	255	134	336	174	226	201
ENSG00000068024	HDAC4	protein_coding	P56524	225	249	97	340	437	141	123	205	259	300	180	329	162	220	188
ENSG00000068028	RASSF1	protein_coding	Q9NS23	476	611	288	579	759	337	345	526	504	718	680	1191	680	905	779
ENSG00000068078	FGFR3	protein_coding	P22607	520	696	281	1075	1310	194	238	386	564	559	401	871	386	524	494
ENSG00000068079	IFI35	protein_coding	P80217	16	33	22	47	58	12	8	16	28	47	27	63	42	52	66
ENSG00000068097	HEATR6	protein_coding	Q6AI08	522	846	283	1054	1336	466	516	710	1084	1363	1411	2231	1547	1913	1903
ENSG00000068120	COASY	protein_coding	Q13057	608	932	431	1411	1674	507	532	781	1169	1467	1048	1895	1021	1561	1471
ENSG00000068137	PLEKHH3	protein_coding	Q7Z736	353	457	208	580	727	163	171	221	389	518	303	630	360	506	444
ENSG00000068305	MEF2A	protein_coding	Q02078	573	1169	469	1099	1469	1503	1928	2621	2460	2757	2838	5324	2154	2981	2839
ENSG00000068308	OTUD5	protein_coding	Q96G74	486	716	270	852	1067	407	401	643	934	1214	814	1500	950	1220	1165
ENSG00000068323	TFE3	protein_coding	P19532	585	833	332	729	1002	250	313	455	537	717	592	1070	680	947	943
ENSG00000068354	TBC1D25	protein_coding	Q3MII6	174	268	133	367	436	171	179	218	339	359	337	670	306	416	459
ENSG00000068366	ACSL4	protein_coding	O60488	277	455	181	534	622	668	772	1083	1800	2157	823	1381	1243	1669	1632
ENSG00000068383	INPP5A	protein_coding	Q14642	296	609	173	509	663	341	359	475	555	580	1059	1668	569	793	711
ENSG00000068394	GPKOW	protein_coding	Q92917	276	463	211	506	603	376	398	484	839	1021	644	1309	784	1138	1116
ENSG00000068400	GRIPAP1	protein_coding	Q4V328	512	752	289	810	995	461	452	619	753	958	495	1070	598	812	784
ENSG00000068438	FTSJ1	protein_coding	Q9UET6	264	408	204	487	591	283	321	374	558	654	494	963	468	780	660
ENSG00000068489	PRR11	protein_coding	Q96HE9	136	276	102	282	373	209	221	304	446	633	437	837	449	613	625
ENSG00000068615	REEP1	protein_coding	Q9H902	60	80	39	99	120	100	122	147	200	268	152	289	139	181	190
ENSG00000068650	ATP11A	protein_coding	P98196	243	359	155	555	673	229	218	389	434	571	211	561	224	335	284
ENSG00000068654	POLR1A	protein_coding	O95602	1798	2518	1104	3234	4023	1640	1967	2612	3817	4464	2202	4176	3406	4540	4236
ENSG00000068697	LAPTM4A	protein_coding	Q15012	1241	1933	654	1722	2084	1820	1991	2729	3266	4063	3600	7581	3451	4538	4346
ENSG00000068724	TTC7A	protein_coding	Q9ULT0	104	136	50	186	218	61	66	66	120	161	74	143	82	129	105
ENSG00000068745	IP6K2	protein_coding	Q9UHH9	1588	2574	975	3124	3679	2361	2400	3333	4499	5681	4771	8699	5407	7202	7065
ENSG00000068781	STON1-GTF2A1L	protein_coding	Q53S48	0	0	0	1	0	0	0	0	0	1	0	0	0	0	0
ENSG00000068784	SRBD1	protein_coding	Q8N5C6	400	583	197	593	651	721	774	1137	1409	1830	634	1133	1163	1570	1677
ENSG00000068796	KIF2A	protein_coding	O00139	441	783	273	899	1154	1039	1197	1936	2606	3260	1528	2854	1959	2940	2843
ENSG00000068831	RASGRP2	protein_coding	Q7LDG7	15	31	10	36	88	17	19	21	30	52	23	58	32	52	51
ENSG00000068878	PSME4	protein_coding	Q14997	772	1144	460	1271	1585	1110	1251	1692	2082	2606	1195	2407	1347	2119	1830
ENSG00000068885	IFT80	protein_coding	Q9P2H3	140	206	82	213	290	173	224	257	364	355	162	386	202	276	278
ENSG00000068903	SIRT2	protein_coding	Q8IXJ6	0	0	0	0	0	0	0	0	0	0	0	0	0	0	0
ENSG00000068912	ERLEC1	protein_coding	Q96DZ1	154	199	103	236	280	235	272	364	387	490	296	539	249	378	356
ENSG00000068971	PPP2R5B	protein_coding	Q15173	195	277	115	252	345	85	84	149	167	205	141	256	157	208	195
ENSG00000068976	PYGM	protein_coding	P11217	48	54	35	110	150	37	42	45	60	76	36	127	26	38	27
ENSG00000068985	PAGE1	protein_coding	O75459	0	0	0	1	0	0	0	0	1	1	1	1	0	0	0
ENSG00000069011	PITX1	protein_coding	P78337	331	521	251	640	850	261	301	339	543	704	348	789	379	475	409
ENSG00000069018	TRPC7	protein_coding	Q9HCX4	1	1	1	3	3	0	0	0	0	3	2	5	1	0	0
ENSG00000069020	MAST4	protein_coding	O15021	70	150	41	165	193	82	97	178	173	208	102	179	133	193	172
ENSG00000069122	ADGRF5	protein_coding	Q8IZF2	0	3	0	1	0	1	1	2	0	1	0	0	1	4	3
ENSG00000069188	SDK2	protein_coding	Q58EX2	211	305	129	558	563	209	196	298	534	681	263	546	447	565	536
ENSG00000069206	ADAM7	protein_coding	Q9H2U9	0	0	0	0	0	0	0	0	0	0	0	0	0	0	0
ENSG00000069248	NUP133	protein_coding	Q8WUM0	2286	3554	1337	4181	4533	4267	4525	6631	10136	12204	4758	8139	7675	10502	10627
ENSG00000069275	NUCKS1	protein_coding	Q9H1E3	12953	21706	8988	26167	31668	17303	18580	24782	38665	41313	25315	52042	40108	39172	36121
ENSG00000069329	VPS35	protein_coding	Q96QK1	1227	1776	681	1949	2047	1975	1969	2688	4306	5411	3088	5313	3943	5317	5343
ENSG00000069345	DNAJA2	protein_coding	O60884	1074	1744	720	1956	2049	2492	2645	3628	5437	6310	3729	6718	4747	6185	6542
ENSG00000069399	BCL3	protein_coding	P20749	7	16	1	11	22	6	4	4	16	16	3	15	6	9	9
ENSG00000069424	KCNAB2	protein_coding	Q13303	12	26	11	25	26	10	9	21	38	43	15	26	29	19	32
ENSG00000069431	ABCC9	protein_coding	O60706	5	0	2	5	6	4	5	13	5	7	3	9	4	9	16
ENSG00000069482	GAL	protein_coding	P22466	272	393	166	466	543	346	324	436	853	1098	757	1385	723	1112	1090
ENSG00000069493	CLEC2D	protein_coding	Q9UHP7	27	25	10	24	50	16	26	44	42	59	10	41	15	24	27
ENSG00000069509	FUNDC1	protein_coding	Q8IVP5	314	519	220	719	651	664	630	787	1219	1293	1036	1805	895	1330	1420
ENSG00000069535	MAOB	protein_coding	P27338	7	8	2	1	4	5	9	5	7	9	10	19	8	12	7
ENSG00000069667	RORA	protein_coding	P35398	68	68	35	126	168	47	78	103	139	153	62	201	116	146	146
ENSG00000069696	DRD4	protein_coding	P21917	0	0	0	0	0	0	0	0	0	0	0	0	0	0	0
ENSG00000069702	TGFBR3	protein_coding	Q03167	179	261	86	314	378	264	238	323	497	585	311	652	358	492	487
ENSG00000069712	KIAA1107	protein_coding	Q9UPP5	0	0	0	0	0	0	0	0	0	0	0	0	0	0	0
ENSG00000069764	PLA2G10	protein_coding	O15496	0	0	0	0	0	0	0	0	0	0	0	0	0	0	0
ENSG00000069812	HES2	protein_coding	Q9Y543	7	2	0	4	6	2	7	2	2	7	5	2	1	5	0
ENSG00000069849	ATP1B3	protein_coding	P54709	788	1192	545	1932	2120	1533	1342	1975	3421	4454	2586	4913	3329	4610	4620
ENSG00000069869	NEDD4	protein_coding	P46934	106	215	68	173	223	196	235	299	359	529	374	631	409	485	521
ENSG00000069943	PIGB	protein_coding	Q92521	24	42	15	57	72	34	40	39	74	86	52	95	47	68	103
ENSG00000069956	MAPK6	protein_coding	Q16659	382	571	192	902	1192	214	205	289	413	524	573	1247	548	698	665
ENSG00000069966	GNB5	protein_coding	O14775	123	187	66	259	334	114	136	170	321	468	307	589	407	536	513
ENSG00000069974	RAB27A	protein_coding	P51159	28	23	6	35	46	28	28	59	81	86	43	89	54	51	74
ENSG00000069998	CECR5	protein_coding	Q9BXW7	759	984	408	1302	1598	530	645	901	1423	1654	1214	2402	1534	1982	1921
ENSG00000070010	UFD1L	protein_coding	#N/A	800	1217	486	1505	1807	808	823	1048	2033	2617	1687	3203	2155	2921	2807
ENSG00000070018	LRP6	protein_coding	O75581	0	0	0	0	0	0	0	0	0	0	0	0	0	0	0
ENSG00000070019	GUCY2C	protein_coding	P25092	5	4	1	3	5	3	4	2	4	3	2	4	0	0	2
ENSG00000070031	SCT	protein_coding	P09683	0	0	0	0	0	0	0	0	0	0	0	0	0	0	0
ENSG00000070047	PHRF1	protein_coding	Q9P1Y6	15	7	7	83	84	15	7	23	59	10	4	28	27	1	57
ENSG00000070061	IKBKAP	protein_coding	#N/A	1661	2542	934	3210	3730	1941	2011	2667	4230	5025	2210	3969	3290	4505	4169
ENSG00000070081	NUCB2	protein_coding	P80303	760	1135	457	1223	1366	1460	1443	1977	2579	3391	2058	3636	2475	3601	3498
ENSG00000070087	PFN2	protein_coding	P35080	834	1263	575	1759	2056	1652	1651	2358	3774	4646	3344	6064	3533	4652	4472
ENSG00000070159	PTPN3	protein_coding	P26045	242	404	98	574	680	171	182	291	411	509	337	618	433	600	515
ENSG00000070182	SPTB	protein_coding	P11277	124	195	90	231	286	104	136	173	248	271	169	265	179	197	193
ENSG00000070190	DAPP1	protein_coding	Q9UN19	0	0	1	0	1	1	0	0	0	2	1	8	0	2	0
ENSG00000070193	FGF10	protein_coding	O15520	0	0	0	0	0	0	0	0	0	0	0	0	0	0	0
ENSG00000070214	SLC44A1	protein_coding	Q8WWI5	170	276	107	363	426	251	273	306	486	583	431	760	394	573	479
ENSG00000070269	TMEM260	protein_coding	Q9NX78	83	118	55	163	209	79	94	158	164	204	123	186	145	188	167
ENSG00000070366	SMG6	protein_coding	Q86US8	739	1155	414	1227	1439	615	626	831	1279	1556	1180	1845	1172	1396	1400
ENSG00000070367	EXOC5	protein_coding	O00471	442	619	257	651	760	561	668	967	1024	1278	874	1841	908	1282	1124
ENSG00000070371	CLTCL1	protein_coding	P53675	525	934	348	1021	1198	675	699	1072	1341	1482	759	1324	1151	1400	1259
ENSG00000070388	FGF22	protein_coding	Q9HCT0	8	5	3	8	19	0	5	8	11	17	5	11	1	11	5
ENSG00000070404	FSTL3	protein_coding	O95633	28	37	40	70	110	33	25	51	50	46	29	63	47	52	57
ENSG00000070413	DGCR2	protein_coding	P98153	968	1402	619	1578	2052	581	698	922	1245	1613	985	2018	955	1399	1190
ENSG00000070423	RNF126	protein_coding	Q9BV68	648	915	362	934	1274	390	425	558	769	897	644	1305	645	866	793
ENSG00000070444	MNT	protein_coding	Q99583	161	234	118	342	392	136	127	199	271	372	149	351	229	266	293
ENSG00000070476	ZXDC	protein_coding	Q2QGD7	690	1041	438	1333	1870	567	635	816	1164	1351	814	1876	917	1190	1145
ENSG00000070495	JMJD6	protein_coding	Q6NYC1	612	956	420	1343	1538	598	648	878	1516	1828	1258	2507	1742	2381	2333
ENSG00000070501	POLB	protein_coding	P06746	160	222	97	326	392	352	334	468	718	871	571	865	612	864	817
ENSG00000070526	ST6GALNAC1	protein_coding	Q9NSC7	3	7	4	5	14	4	5	10	5	6	6	4	1	4	4
ENSG00000070540	WIPI1	protein_coding	Q5MNZ9	30	46	21	62	94	27	25	47	55	79	57	83	65	75	72
ENSG00000070601	FRMPD1	protein_coding	Q5SYB0	8	15	4	15	17	6	5	22	23	29	19	26	15	16	23
ENSG00000070610	GBA2	protein_coding	Q9HCG7	531	753	347	1020	1333	425	470	645	944	1059	544	1068	509	742	643
ENSG00000070614	NDST1	protein_coding	P52848	562	842	348	1073	1438	407	447	649	803	964	448	1041	458	778	632
ENSG00000070669	ASNS	protein_coding	P08243	1263	1898	676	2065	2421	2107	2176	2924	4357	5416	2583	5079	4662	6345	6584
ENSG00000070718	AP3M2	protein_coding	P53677	254	458	162	487	541	322	264	420	671	771	584	1109	611	844	795
ENSG00000070729	CNGB1	protein_coding	Q14028	0	3	0	0	0	0	1	2	0	0	0	1	0	1	0
ENSG00000070731	ST6GALNAC2	protein_coding	Q9UJ37	9	16	6	17	18	9	10	13	20	17	14	14	3	23	11
ENSG00000070748	CHAT	protein_coding	P28329	0	0	0	0	0	0	0	0	0	0	0	0	0	0	0
ENSG00000070756	PABPC1	protein_coding	P11940	6089	9089	3586	12619	14221	7001	7621	10097	17868	21445	9414	17115	17917	22680	23541
ENSG00000070759	TESK2	protein_coding	Q96S53	61	54	29	72	85	51	38	77	83	108	53	151	59	82	67
ENSG00000070761	CFAP20	protein_coding	Q9Y6A4	502	841	273	1032	1096	662	690	881	1419	1891	1255	2431	1482	2069	1862
ENSG00000070770	CSNK2A2	protein_coding	P19784	1080	1645	696	1850	2154	1613	1726	2397	3161	3881	2692	4788	2567	3381	3389
ENSG00000070778	PTPN21	protein_coding	Q16825	116	127	63	135	174	81	74	127	132	160	51	143	83	105	88
ENSG00000070785	EIF2B3	protein_coding	Q9NR50	624	994	383	1137	1241	1090	1142	1365	2364	2892	1443	2864	2105	2686	2638
ENSG00000070808	CAMK2A	protein_coding	Q9UQM7	0	1	1	1	0	0	0	0	0	0	0	0	0	0	0
ENSG00000070814	TCOF1	protein_coding	Q13428	1634	2266	1042	3697	4292	1494	1571	2420	3592	4084	2311	3980	3217	4454	4290
ENSG00000070831	CDC42	protein_coding	P60953	573	958	313	1010	1271	1092	1030	1520	2171	3594	2894	4379	2485	3574	3768
ENSG00000070882	OSBPL3	protein_coding	Q9H4L5	196	276	126	331	408	214	253	379	444	587	274	486	291	425	441
ENSG00000070886	EPHA8	protein_coding	P29322	25	39	15	37	58	26	21	34	52	65	51	87	54	55	65
ENSG00000070915	SLC12A3	protein_coding	P55017	1	2	0	0	4	1	0	2	1	0	0	2	0	2	0
ENSG00000070950	RAD18	protein_coding	Q9NS91	502	816	326	855	956	719	696	1194	1368	1791	1315	2498	1581	1963	2012
ENSG00000070961	ATP2B1	protein_coding	P20020	619	912	321	1060	1179	910	943	1264	1619	2096	1147	2203	1406	1998	1783
ENSG00000070985	TRPM5	protein_coding	Q9NZQ8	5	4	5	6	3	2	0	7	2	5	0	7	0	7	1
ENSG00000071051	NCK2	protein_coding	O43639	67	153	53	195	230	90	120	149	250	317	144	248	222	277	259
ENSG00000071054	MAP4K4	protein_coding	O95819	808	1243	469	1783	2012	815	902	1386	1884	2087	1041	2240	1339	2104	1974
ENSG00000071073	MGAT4A	protein_coding	Q9UM21	104	144	56	149	195	126	97	201	238	305	138	309	147	224	184
ENSG00000071082	RPL31	protein_coding	P62899	10465	17578	4950	24718	28363	8016	7898	9921	20010	23389	42595	75126	40066	55381	55624
ENSG00000071127	WDR1	protein_coding	O75083	1047	1658	682	1741	1916	1247	1373	1815	2253	2747	2398	3824	2777	3878	3595
ENSG00000071189	SNX13	protein_coding	Q9Y5W8	251	328	129	426	532	207	221	355	361	432	322	726	321	435	402
ENSG00000071203	MS4A12	protein_coding	Q9NXJ0	0	0	0	0	0	0	1	0	0	1	0	0	0	0	0
ENSG00000071205	ARHGAP10	protein_coding	A1A4S6	227	277	133	423	498	169	213	286	436	597	276	538	360	516	458
ENSG00000071242	RPS6KA2	protein_coding	Q15349	135	176	57	265	367	72	77	103	134	218	130	240	165	214	138
ENSG00000071243	ING3	protein_coding	Q9NXR8	239	382	156	511	479	374	346	597	846	1105	726	1244	845	1213	1235
ENSG00000071246	VASH1	protein_coding	Q7L8A9	92	128	67	195	296	44	59	98	161	183	74	180	87	114	88
ENSG00000071282	LMCD1	protein_coding	Q9NZU5	50	80	29	95	151	55	51	70	146	150	153	265	233	264	278
ENSG00000071462	WBSCR22	protein_coding	#N/A	730	1183	453	1809	2152	803	750	1111	2137	2994	2751	4922	3369	4702	4293
ENSG00000071537	SEL1L	protein_coding	Q9UBV2	372	646	262	842	922	565	662	915	1135	1602	816	1593	1083	1521	1358
ENSG00000071539	TRIP13	protein_coding	Q15645	341	595	266	803	950	714	737	1238	1700	1958	1039	2010	1244	1839	1954
ENSG00000071553	ATP6AP1	protein_coding	Q15904	1634	2600	885	3072	3880	1518	1695	2251	3605	4773	4079	7613	5045	6918	6725
ENSG00000071564	TCF3	protein_coding	P15923	809	1203	490	1479	1911	428	466	637	1002	1259	675	1445	692	946	818
ENSG00000071575	TRIB2	protein_coding	Q92519	24	44	20	84	110	24	35	30	51	64	42	88	40	78	64
ENSG00000071626	DAZAP1	protein_coding	Q96EP5	2113	2872	1274	3618	4384	2256	2508	3624	5118	6277	2915	5571	3751	5360	5182
ENSG00000071655	MBD3	protein_coding	O95983	1346	1992	762	2038	3057	395	467	640	1015	1471	845	2043	917	1293	1060
ENSG00000071677	PRLH	protein_coding	P81277	0	0	0	0	0	0	0	0	0	0	0	0	0	0	0
ENSG00000071794	HLTF	protein_coding	Q14527	957	1740	598	1840	1986	1954	2065	3106	4678	5425	1930	3556	3496	4704	4719
ENSG00000071859	FAM50A	protein_coding	Q14320	871	1312	553	1743	2095	802	817	1169	1977	2482	1697	2937	2329	3296	3360
ENSG00000071889	FAM3A	protein_coding	P98173	442	563	243	754	935	214	239	324	516	610	471	880	576	707	710
ENSG00000071894	CPSF1	protein_coding	Q10570	1590	2362	880	2516	3124	805	927	1178	1932	2456	1668	3118	2316	3043	2765
ENSG00000071909	MYO3B	protein_coding	Q8WXR4	0	0	0	0	0	0	1	0	0	2	0	0	0	0	0
ENSG00000071967	CYBRD1	protein_coding	Q53TN4	21	41	11	45	49	33	23	59	57	74	54	85	36	77	59
ENSG00000071991	CDH19	protein_coding	Q9H159	0	0	0	0	0	0	0	0	0	0	0	0	0	0	0
ENSG00000071994	PDCD2	protein_coding	Q16342	290	455	199	553	644	254	316	400	585	791	546	1165	693	1003	981
ENSG00000072041	SLC6A15	protein_coding	Q9H2J7	911	1166	461	1561	1490	1331	1354	1756	2896	3700	2005	3820	2489	3127	3165
ENSG00000072042	RDH11	protein_coding	Q8TC12	626	822	333	1160	1289	625	659	885	1396	1680	1389	2707	1431	1963	1860
ENSG00000072062	PRKACA	protein_coding	P17612	1160	1618	592	1812	1974	1010	1023	1441	2062	2710	2123	4067	2539	3505	3117
ENSG00000072071	ADGRL1	protein_coding	O94910	754	1194	443	1414	1929	368	369	544	696	968	551	1279	587	787	645
ENSG00000072080	SPP2	protein_coding	Q13103	1	1	0	1	0	1	0	1	2	1	0	1	1	2	1
ENSG00000072110	ACTN1	protein_coding	P12814	1423	2227	745	2074	2633	1161	1303	1597	2487	3227	2160	4240	2999	3671	3940
ENSG00000072121	ZFYVE26	protein_coding	Q68DK2	580	815	344	1162	1518	533	568	810	964	1161	454	1017	535	763	667
ENSG00000072133	RPS6KA6	protein_coding	Q9UK32	46	57	23	63	98	56	61	95	109	138	58	126	59	77	75
ENSG00000072134	EPN2	protein_coding	O95208	380	594	238	766	1087	312	343	425	729	880	1014	1582	886	1138	1054
ENSG00000072135	PTPN18	protein_coding	Q99952	146	226	100	281	362	137	126	173	262	331	293	578	232	405	377
ENSG00000072163	LIMS2	protein_coding	Q7Z4I7	4	7	8	15	8	5	4	9	7	4	4	9	5	5	12
ENSG00000072182	ASIC4	protein_coding	Q96FT7	9	6	1	13	25	3	5	6	1	3	0	13	1	3	4
ENSG00000072195	SPEG	protein_coding	Q15772	117	164	63	147	264	47	52	59	68	80	80	201	55	77	91
ENSG00000072201	LNX1	protein_coding	Q8TBB1	0	1	0	0	0	0	0	0	1	0	0	2	0	3	1
ENSG00000072210	ALDH3A2	protein_coding	P51648	441	660	233	895	975	645	671	865	1366	1634	1187	2205	1109	1618	1645
ENSG00000072274	TFRC	protein_coding	P02786	1975	3263	1144	9170	9844	3472	3623	5057	18360	23067	6107	10882	16657	22808	22541
ENSG00000072310	SREBF1	protein_coding	P36956	371	486	206	315	397	236	293	346	317	388	366	775	301	366	356
ENSG00000072315	TRPC5	protein_coding	Q9UL62	0	0	0	1	2	0	2	0	0	0	0	1	0	0	1
ENSG00000072364	AFF4	protein_coding	Q9UHB7	770	1226	548	1236	1542	929	1116	1615	1692	2334	1495	2945	1559	2234	2083
ENSG00000072401	UBE2D1	protein_coding	P51668	93	125	48	177	201	156	173	235	449	537	306	562	317	477	476
ENSG00000072415	MPP5	protein_coding	Q8N3R9	756	1436	483	1049	1275	1761	2021	2971	2677	3062	2948	4602	2180	2750	2799
ENSG00000072422	RHOBTB1	protein_coding	O94844	86	93	44	146	202	79	88	155	174	182	97	212	107	189	162
ENSG00000072501	SMC1A	protein_coding	Q14683	5266	8083	3416	13251	14333	6473	7063	9385	17884	22249	11980	17890	17496	20960	20414
ENSG00000072506	HSD17B10	protein_coding	Q99714	2287	4014	1472	5269	6341	2478	2559	3495	6320	7996	9112	17486	11043	14527	14458
ENSG00000072518	MARK2	protein_coding	Q7KZI7	616	916	367	1139	1440	530	506	843	1209	1440	760	1486	975	1465	1368
ENSG00000072571	HMMR	protein_coding	O75330	647	1012	410	1016	1279	1144	1202	1825	2098	2349	1357	2316	1824	2403	2419
ENSG00000072609	CHFR	protein_coding	Q96EP1	469	699	292	688	897	229	250	344	409	439	418	779	482	699	604
ENSG00000072657	TRHDE	protein_coding	Q9UKU6	2	1	4	1	4	4	1	3	9	5	7	7	1	5	4
ENSG00000072682	P4HA2	protein_coding	O15460	217	323	129	338	387	251	261	410	509	660	497	897	623	860	787
ENSG00000072694	FCGR2B	protein_coding	P31994	0	0	0	0	1	0	0	0	0	0	0	1	0	0	0
ENSG00000072736	NFATC3	protein_coding	Q12968	288	446	141	574	697	295	409	531	736	967	673	1119	634	828	782
ENSG00000072756	TRNT1	protein_coding	Q96Q11	172	236	95	329	428	298	286	436	672	916	434	649	496	689	665
ENSG00000072778	ACADVL	protein_coding	P49748	609	825	388	996	1201	493	521	704	901	1025	980	1857	1135	1718	1569
ENSG00000072786	STK10	protein_coding	O94804	347	483	198	546	726	256	242	340	483	590	385	811	480	635	614
ENSG00000072803	FBXW11	protein_coding	Q9UKB1	498	829	296	821	951	852	936	1102	1487	1839	1427	2839	1273	1717	1612
ENSG00000072818	ACAP1	protein_coding	Q15027	16	32	10	14	52	13	11	12	30	26	15	30	17	27	14
ENSG00000072832	CRMP1	protein_coding	Q14194	54	76	36	87	66	28	37	49	49	57	59	108	59	63	52
ENSG00000072840	EVC	protein_coding	P57679	149	130	69	301	349	52	68	115	155	211	74	185	82	148	108
ENSG00000072849	DERL2	protein_coding	Q9GZP9	267	404	146	502	592	561	530	813	978	1301	996	1932	821	1083	1072
ENSG00000072858	SIDT1	protein_coding	Q9NXL6	10	13	6	27	20	7	8	13	22	24	28	49	27	38	35
ENSG00000072864	NDE1	protein_coding	Q9NXR1	0	0	0	0	0	0	0	0	1	0	0	0	0	1	0
ENSG00000072952	MRVI1	protein_coding	Q9Y6F6	0	3	0	6	5	1	3	5	3	1	0	0	0	0	0
ENSG00000072954	TMEM38A	protein_coding	Q9H6F2	34	39	14	59	125	25	28	51	63	59	57	127	54	76	52
ENSG00000072958	AP1M1	protein_coding	Q9BXS5	556	860	344	1044	1378	590	664	899	1505	2022	1283	2403	1384	1980	1944
ENSG00000073008	PVR	protein_coding	P15151	457	618	249	787	958	329	396	506	754	953	521	1118	635	972	876
ENSG00000073050	XRCC1	protein_coding	P18887	245	366	171	454	530	199	213	293	455	605	285	523	579	751	811
ENSG00000073060	SCARB1	protein_coding	Q8WTV0	819	1382	447	1431	1731	704	741	863	1475	1832	1178	2435	1433	1906	1736
ENSG00000073067	CYP2W1	protein_coding	Q8TAV3	5	9	6	5	10	2	1	2	2	5	2	3	0	4	4
ENSG00000073111	MCM2	protein_coding	P49736	6401	11403	4577	13140	15818	7477	8945	13784	15895	16721	10791	15162	20030	25495	25859
ENSG00000073146	MOV10L1	protein_coding	Q9BXT6	1	2	0	3	2	0	0	4	2	2	2	1	2	0	1
ENSG00000073150	PANX2	protein_coding	Q96RD6	41	49	23	69	107	18	33	32	52	54	49	86	32	36	42
ENSG00000073169	SELENOO	protein_coding	Q9BVL4	305	447	185	475	691	181	187	275	325	405	326	656	288	395	363
ENSG00000073282	TP63	protein_coding	Q9H3D4	0	0	0	0	4	0	0	0	0	0	0	0	0	0	0
ENSG00000073331	ALPK1	protein_coding	Q96QP1	34	33	25	68	85	38	60	68	106	131	79	104	88	111	119
ENSG00000073350	LLGL2	protein_coding	Q6P1M3	129	214	91	242	314	82	89	114	184	247	120	243	147	217	185
ENSG00000073417	PDE8A	protein_coding	O60658	228	343	112	448	601	209	203	395	400	509	235	490	273	428	390
ENSG00000073464	CLCN4	protein_coding	P51793	0	3	2	3	0	1	3	5	1	1	0	2	1	3	3
ENSG00000073536	NLE1	protein_coding	Q9NVX2	721	1128	399	802	1071	463	516	662	817	1056	864	1680	867	1127	1090
ENSG00000073578	SDHA	protein_coding	P31040	949	1363	516	1456	1529	1107	1168	1534	2155	2927	2436	3925	2618	3401	3425
ENSG00000073584	SMARCE1	protein_coding	Q969G3	86	115	39	93	138	142	177	228	163	291	156	292	170	207	213
ENSG00000073598	FNDC8	protein_coding	Q8TC99	3	2	5	4	15	2	1	8	6	7	1	8	1	7	2
ENSG00000073605	GSDMB	protein_coding	Q8TAX9	40	35	31	90	85	30	32	51	62	50	22	85	26	43	34
ENSG00000073614	KDM5A	protein_coding	P29375	4749	7446	3181	7064	8795	2824	3110	4258	4437	5074	6211	12714	4245	5748	5354
ENSG00000073670	ADAM11	protein_coding	O75078	90	147	52	166	241	46	61	82	131	156	69	208	89	121	128
ENSG00000073711	PPP2R3A	protein_coding	Q06190	37	82	19	106	113	69	89	141	199	264	108	222	105	159	136
ENSG00000073712	FERMT2	protein_coding	Q96AC1	538	859	302	1063	1097	967	1016	1389	2204	2610	1371	2210	1932	2551	2672
ENSG00000073734	ABCB11	protein_coding	O95342	0	0	0	0	0	0	0	0	0	0	0	0	1	0	0
ENSG00000073737	DHRS9	protein_coding	Q9BPW9	0	1	1	0	1	2	1	0	1	5	0	3	5	4	1
ENSG00000073754	CD5L	protein_coding	O43866	0	0	0	0	0	0	0	0	0	0	3	0	0	0	0
ENSG00000073756	PTGS2	protein_coding	P35354	23	38	14	37	34	29	46	67	51	63	71	120	79	82	101
ENSG00000073792	IGF2BP2	protein_coding	Q9Y6M1	274	385	184	409	479	307	349	376	639	943	427	870	583	741	761
ENSG00000073803	MAP3K13	protein_coding	O43283	179	261	103	386	483	536	557	905	972	1073	822	1543	631	774	908
ENSG00000073849	ST6GAL1	protein_coding	P15907	32	49	30	76	92	47	46	70	87	107	71	146	49	96	93
ENSG00000073861	TBX21	protein_coding	Q9UL17	1	3	2	0	3	0	1	2	1	2	10	6	4	4	5
ENSG00000073905	VDAC1P1	processed_pseudogene	#N/A	94	124	54	125	117	186	168	261	307	356	208	403	300	371	309
ENSG00000073910	FRY	protein_coding	Q5TBA9	43	60	24	68	109	34	41	58	64	84	55	94	47	63	54
ENSG00000073921	PICALM	protein_coding	Q13492	540	783	337	863	982	770	872	1224	1604	2315	1425	2467	1807	2541	2454
ENSG00000073969	NSF	protein_coding	P46459	0	1	0	0	2	0	0	0	1	2	2	1	0	4	0
ENSG00000074047	GLI2	protein_coding	P10070	65	89	48	153	208	50	52	90	152	166	61	138	80	118	138
ENSG00000074054	CLASP1	protein_coding	Q7Z460	1262	1861	684	2105	2630	1297	1341	1942	2644	3259	1889	3187	2387	2973	3013
ENSG00000074071	MRPS34	protein_coding	P82930	997	1459	590	1937	2377	807	896	1022	2385	3338	2409	4687	3121	3817	3691
ENSG00000074181	NOTCH3	protein_coding	Q9UM47	503	765	297	745	976	354	352	473	508	624	480	1061	453	673	571
ENSG00000074201	CLNS1A	protein_coding	P54105	1337	1957	790	2523	2815	1877	1824	2469	4648	5721	4008	7394	5138	6864	6726
ENSG00000074211	PPP2R2C	protein_coding	Q9Y2T4	32	45	11	48	79	24	21	24	39	45	22	66	19	23	27
ENSG00000074219	TEAD2	protein_coding	Q15562	188	242	102	330	366	109	129	146	296	298	160	389	182	228	240
ENSG00000074266	EED	protein_coding	O75530	546	909	350	1101	1394	682	734	1082	1779	2176	1723	2805	1903	2359	2400
ENSG00000074276	CDHR2	protein_coding	Q9BYE9	11	21	2	31	41	3	8	15	17	29	12	21	10	15	10
ENSG00000074317	SNCB	protein_coding	Q16143	31	36	18	34	44	38	46	32	63	54	101	167	85	100	87
ENSG00000074319	TSG101	protein_coding	Q99816	557	1028	357	970	1127	896	896	1227	1908	2360	1411	2470	1803	2373	2389
ENSG00000074356	NCBP3	protein_coding	Q53F19	1893	2863	1082	3212	3976	1565	1587	2148	3002	3751	2972	5915	2761	3732	3645
ENSG00000074370	ATP2A3	protein_coding	Q93084	146	262	65	183	254	94	128	149	187	227	332	592	257	317	306
ENSG00000074410	CA12	protein_coding	O43570	14	24	6	26	25	19	22	17	28	33	33	51	20	31	28
ENSG00000074416	MGLL	protein_coding	Q99685	14	13	7	16	31	8	12	15	22	25	17	22	23	28	25
ENSG00000074527	NTN4	protein_coding	Q9HB63	14	22	7	24	31	13	13	15	16	23	16	65	28	39	40
ENSG00000074582	BCS1L	protein_coding	Q9Y276	474	732	264	1024	1080	555	523	811	1186	1439	1025	1823	1004	1460	1407
ENSG00000074590	NUAK1	protein_coding	O60285	85	138	56	136	184	121	131	165	172	209	101	230	119	163	154
ENSG00000074603	DPP8	protein_coding	Q6V1X1	354	567	191	593	850	385	371	562	711	918	429	1045	526	751	626
ENSG00000074621	SLC24A1	protein_coding	O60721	97	175	91	193	233	77	114	179	147	202	106	242	118	144	172
ENSG00000074657	ZNF532	protein_coding	Q9HCE3	113	178	58	126	239	44	54	82	87	111	76	157	64	101	81
ENSG00000074660	SCARF1	protein_coding	Q14162	0	0	0	0	0	0	0	0	0	0	0	0	0	0	0
ENSG00000074695	LMAN1	protein_coding	P49257	1290	2021	744	2066	2522	2268	2388	3355	4052	5331	3406	5955	3853	5433	5192
ENSG00000074696	HACD3	protein_coding	Q9P035	5214	9287	3452	10591	12807	9042	9664	12271	15411	17546	27792	46188	23963	28445	28774
ENSG00000074706	IPCEF1	protein_coding	Q8WWN9	3	16	1	12	3	8	5	7	8	8	11	22	7	12	7
ENSG00000074755	ZZEF1	protein_coding	O43149	1486	2121	812	2237	3144	1120	1291	1944	2244	2804	1087	2433	1351	2078	1697
ENSG00000074771	NOX3	protein_coding	Q9HBY0	0	0	0	0	0	0	0	0	0	0	0	0	0	0	0
ENSG00000074800	ENO1	protein_coding	P06733	40878	78104	27274	76002	96171	40333	45015	62700	93279	120937	105089	196238	152765	197827	186748
ENSG00000074803	SLC12A1	protein_coding	Q13621	0	3	0	0	1	1	0	0	1	3	0	0	1	0	0
ENSG00000074842	MYDGF	protein_coding	Q969H8	438	625	288	778	929	410	454	536	1060	1452	866	1775	1091	1460	1452
ENSG00000074855	ANO8	protein_coding	Q9HCE9	337	475	177	535	676	158	130	166	281	335	265	632	241	333	273
ENSG00000074935	TUBE1	protein_coding	Q9UJT0	278	399	155	483	659	265	222	410	506	641	497	1003	638	885	792
ENSG00000074964	ARHGEF10L	protein_coding	Q9HCE6	72	106	32	154	218	39	36	50	80	106	48	95	44	74	67
ENSG00000074966	TXK	protein_coding	P42681	3	5	0	1	4	0	0	2	3	2	1	3	4	2	0
ENSG00000075035	WSCD2	protein_coding	Q2TBF2	0	0	0	0	0	0	0	0	0	1	0	0	0	1	0
ENSG00000075043	KCNQ2	protein_coding	O43526	29	45	14	46	75	20	16	15	32	32	20	64	15	44	36
ENSG00000075073	TACR2	protein_coding	P21452	0	0	0	3	3	1	2	4	1	2	1	2	1	4	1
ENSG00000075089	ACTR6	protein_coding	Q9GZN1	207	387	132	494	609	462	496	770	1069	1448	672	1150	746	1214	1194
ENSG00000075131	TIPIN	protein_coding	Q9BVW5	905	1431	546	1592	1747	1808	1926	2505	3633	4692	2726	5465	3278	4427	4348
ENSG00000075142	SRI	protein_coding	P30626	537	848	369	1138	1294	727	741	1017	1936	2800	1282	2733	2247	3020	2824
ENSG00000075151	EIF4G3	protein_coding	O43432	1762	2798	1158	5175	6027	1807	1982	2727	4341	5221	2183	4043	3941	5170	5014
ENSG00000075188	NUP37	protein_coding	Q8NFH4	675	1124	479	1160	1275	1464	1516	2388	3121	3627	1516	3086	2198	3159	3136
ENSG00000075213	SEMA3A	protein_coding	Q14563	40	112	35	97	82	76	71	110	143	160	113	195	124	149	154
ENSG00000075218	GTSE1	protein_coding	Q9NYZ3	763	1254	500	1228	1693	701	793	1106	1397	1777	1500	2552	1553	2202	2073
ENSG00000075223	SEMA3C	protein_coding	Q99985	388	539	204	527	714	576	554	705	839	1082	736	1532	879	1133	1124
ENSG00000075234	TTC38	protein_coding	Q5R3I4	215	280	129	349	450	162	197	265	507	587	339	569	343	530	496
ENSG00000075239	ACAT1	protein_coding	P24752	979	1451	600	1869	1774	2025	1970	3063	4510	5751	2873	4901	3855	5499	5623
ENSG00000075240	GRAMD4	protein_coding	Q6IC98	145	180	97	274	338	86	111	141	241	279	164	290	160	240	206
ENSG00000075275	CELSR1	protein_coding	Q9NYQ6	409	562	225	608	845	275	299	410	504	687	291	672	386	494	453
ENSG00000075290	WNT8B	protein_coding	Q93098	4	3	3	7	7	0	0	2	6	8	7	13	5	10	11
ENSG00000075292	ZNF638	protein_coding	Q14966	1294	1835	773	2571	2866	1829	1985	3029	4037	4632	2300	4082	2798	3751	4149
ENSG00000075303	SLC25A40	protein_coding	Q8TBP6	116	186	69	123	158	198	213	262	389	468	256	495	220	299	299
ENSG00000075336	TIMM21	protein_coding	Q9BVV7	222	342	96	492	511	230	256	384	510	641	521	940	624	902	800
ENSG00000075340	ADD2	protein_coding	P35612	400	636	267	770	876	526	490	721	1291	1853	808	1583	1096	1558	1487
ENSG00000075388	FGF4	protein_coding	P08620	0	0	0	0	0	0	0	0	0	0	0	0	0	0	1
ENSG00000075391	RASAL2	protein_coding	Q9UJF2	185	326	133	507	606	236	269	400	604	713	377	708	450	609	534
ENSG00000075399	VPS9D1	protein_coding	Q9Y2B5	56	83	35	76	123	19	45	40	51	60	19	65	47	37	50
ENSG00000075407	ZNF37A	protein_coding	P17032	46	66	44	151	136	96	70	125	193	238	93	160	85	125	130
ENSG00000075413	MARK3	protein_coding	P27448	563	732	300	978	1172	666	714	1025	1380	1634	960	1720	996	1285	1294
ENSG00000075415	SLC25A3	protein_coding	Q00325	1658	2701	1035	3397	3638	2745	2936	4362	6520	8059	5218	9714	6347	9125	8902
ENSG00000075420	FNDC3B	protein_coding	Q53EP0	248	384	172	417	472	191	241	290	397	484	304	593	403	565	633
ENSG00000075426	FOSL2	protein_coding	P15408	111	161	51	188	252	67	91	132	154	172	72	178	135	198	111
ENSG00000075429	CACNG5	protein_coding	Q9UF02	2	1	1	2	2	3	0	3	0	0	3	3	0	2	2
ENSG00000075461	CACNG4	protein_coding	Q9UBN1	4	5	2	6	9	1	5	3	2	5	2	1	3	3	5
ENSG00000075539	FRYL	protein_coding	O94915	342	469	196	621	780	446	440	676	906	1022	392	817	474	664	662
ENSG00000075568	TMEM131	protein_coding	Q92545	326	489	204	469	558	645	605	820	1008	1081	543	931	687	896	834
ENSG00000075618	FSCN1	protein_coding	Q16658	336	489	167	398	543	382	353	491	576	733	570	1010	701	1060	977
ENSG00000075624	ACTB	protein_coding	P60709	15578	26975	8800	23107	27776	13499	13056	15581	26337	37337	51618	93554	57647	70053	64494
ENSG00000075643	MOCOS	protein_coding	Q96EN8	87	135	53	153	183	122	143	206	236	330	146	232	174	231	292
ENSG00000075651	PLD1	protein_coding	Q13393	68	131	40	134	151	136	138	211	227	275	217	379	254	375	385
ENSG00000075673	ATP12A	protein_coding	P54707	4	5	1	5	10	4	5	5	14	7	10	20	9	13	17
ENSG00000075702	WDR62	protein_coding	O43379	1044	1562	659	1891	2389	647	736	1209	1297	1322	751	1433	904	1457	1233
ENSG00000075711	DLG1	protein_coding	Q12959	286	427	154	575	657	445	456	625	958	1153	577	1013	742	987	990
ENSG00000075785	RAB7A	protein_coding	P51149	1486	2081	873	2938	3168	2441	2598	3606	6523	8433	5189	9130	5796	8341	8405
ENSG00000075790	BCAP29	protein_coding	Q9UHQ4	320	425	183	525	474	733	720	1010	1515	1670	966	1596	898	1330	1237
ENSG00000075826	SEC31B	protein_coding	Q9NQW1	118	169	50	224	302	78	74	130	122	164	111	169	77	101	77
ENSG00000075856	SART3	protein_coding	Q15020	1056	1502	607	1638	1963	984	1133	1481	2096	2611	1827	3518	1759	2358	2329
ENSG00000075884	ARHGAP15	protein_coding	Q53QZ3	0	0	0	0	0	0	0	0	0	2	0	0	0	0	1
ENSG00000075886	TUBA3D	protein_coding	P0DPH8	0	3	0	3	7	0	4	1	6	3	0	4	0	0	2
ENSG00000075891	PAX2	protein_coding	Q02962	12	37	13	49	52	24	22	32	41	44	14	56	32	50	33
ENSG00000075914	EXOSC7	protein_coding	Q15024	515	712	275	1007	1143	551	548	648	1272	1739	1543	2740	1710	2161	2248
ENSG00000075945	KIFAP3	protein_coding	Q92845	450	715	298	745	730	953	1057	1497	2045	2231	1016	1596	1527	2237	2239
ENSG00000075975	MKRN2	protein_coding	Q9H000	430	720	271	864	996	761	770	1009	1411	1763	1159	2122	1324	1870	1932
ENSG00000076003	MCM6	protein_coding	Q14566	2312	3689	1191	4700	5078	3830	4064	5393	9617	11074	6071	9644	7922	10711	10196
ENSG00000076043	REXO2	protein_coding	Q9Y3B8	289	410	191	723	867	293	277	425	777	747	565	1020	674	1100	1161
ENSG00000076053	RBM7	protein_coding	Q9Y580	59	91	28	77	131	51	75	97	146	198	181	249	150	217	222
ENSG00000076067	RBMS2	protein_coding	Q15434	58	71	49	90	145	57	94	147	144	210	85	201	113	156	158
ENSG00000076108	BAZ2A	protein_coding	Q9UIF9	1490	2187	896	2766	3434	1382	1511	2137	3260	4051	1827	4005	2219	2889	2614
ENSG00000076201	PTPN23	protein_coding	Q9H3S7	379	512	216	735	759	325	380	533	857	1070	445	867	701	871	928
ENSG00000076242	MLH1	protein_coding	P40692	3	3	2	2	0	0	0	0	1	3	2	3	0	2	0
[truncated: 56,653 more rows]

## Sheet: Column definition
Sheet 1: OMM-proximal translatome
[truncated: 28 more rows]
