# Supplementary material for: OptoRibo-seq for spatiotemporally resolved mapping of local protein translatome
Source: Research Square preprint supplement (doi:10.21203/rs.3.rs-3982122/v1), 2024-03-05
Supplement: Supplementary file 2 [file 51b2ae8565e9c7a46247c347.xlsx]

## Sheet: FPKM data
			Counts		FPKM
Ensemble Gene ID	Gene name	Gene type	HEK293T	RPS25-AP	HEK293T	RPS25-AP
ENSG00000000003	TSPAN6	protein_coding	1028	647	8.35005	8.13266
ENSG00000000005	TNMD	protein_coding	2	4	0.0138748	0.0429426
ENSG00000000419	DPM1	protein_coding	762	525	3.36605	3.58887
ENSG00000000457	SCYL3	protein_coding	76	50	0.178169	0.181393
ENSG00000000460	C1orf112	protein_coding	243	194	0.132389	0.16356
ENSG00000000938	FGR	protein_coding	0	0	0	0
ENSG00000000971	CFH	protein_coding	3	1	0.00328287	0.00169342
ENSG00000001036	FUCA2	protein_coding	332	266	2.05816	2.55185
ENSG00000001084	GCLC	protein_coding	148	165	0.12946	0.223352
ENSG00000001167	NFYA	protein_coding	142	88	0.549697	0.527169
ENSG00000001460	STPG1	protein_coding	105	82	0.183322	0.22155
ENSG00000001461	NIPAL3	protein_coding	56	81	0.102479	0.229384
ENSG00000001497	LAS1L	protein_coding	666	610	3.14016	4.45081
ENSG00000001561	ENPP4	protein_coding	223	156	1.39675	1.51207
ENSG00000001617	SEMA3F	protein_coding	25	24	0.0768738	0.114204
ENSG00000001626	CFTR	protein_coding	0	0	0	0
ENSG00000001629	ANKIB1	protein_coding	42	91	0.0283275	0.09498
ENSG00000001630	CYP51A1	protein_coding	13	18	0.0441649	0.0946322
ENSG00000001631	KRIT1	protein_coding	123	160	0.272706	0.548961
ENSG00000002016	RAD52	protein_coding	46	79	0.0617311	0.164061
ENSG00000002079	MYH16	unitary_pseudogene	0	2	0	0.00447728
ENSG00000002330	BAD	protein_coding	47	26	0.330639	0.283049
ENSG00000002549	LAP3	protein_coding	522	327	1.7746	1.72032
ENSG00000002586	CD99	protein_coding	237	201	0.494715	0.649284
ENSG00000002587	HS3ST1	protein_coding	0	0	0	0
ENSG00000002726	AOC1	protein_coding	0	0	0	0
ENSG00000002745	WNT16	protein_coding	0	1	0	0.0102895
ENSG00000002746	HECW1	protein_coding	1	1	0.000230796	0.000357158
ENSG00000002822	MAD1L1	protein_coding	147	145	0.0368489	0.0562481
ENSG00000002834	LASP1	protein_coding	132	155	0.266084	0.483514
ENSG00000002919	SNX11	protein_coding	59	37	0.313114	0.303867
ENSG00000002933	TMEM176A	protein_coding	0	0	0	0
ENSG00000003056	M6PR	protein_coding	301	244	3.28341	4.11889
ENSG00000003096	KLHL13	protein_coding	184	90	0.0877083	0.0663893
ENSG00000003137	CYP26B1	protein_coding	11	14	0.0612244	0.120585
ENSG00000003147	ICA1	protein_coding	3	52	0.00209982	0.0563243
ENSG00000003249	DBNDD1	protein_coding	21	42	0.143967	0.44558
ENSG00000003393	ALS2	protein_coding	103	132	0.133666	0.265088
ENSG00000003400	CASP10	protein_coding	22	42	0.0494811	0.146184
ENSG00000003402	CFLAR	protein_coding	55	59	0.0949987	0.157703
ENSG00000003436	TFPI	protein_coding	75	88	0.0772993	0.140355
ENSG00000003509	NDUFAF7	protein_coding	66	61	0.317204	0.453687
ENSG00000003756	RBM5	protein_coding	176	450	0.611585	2.41985
ENSG00000003987	MTMR7	protein_coding	7	20	0.00634209	0.0280412
ENSG00000003989	SLC7A2	protein_coding	229	152	0.326095	0.334953
ENSG00000004059	ARF5	protein_coding	1344	1474	41.845	71.0189
ENSG00000004139	SARM1	protein_coding	22	29	0.0579977	0.118309
ENSG00000004142	POLDIP2	protein_coding	363	355	3.67153	5.5565
ENSG00000004399	PLXND1	protein_coding	30	71	0.0607875	0.22263
ENSG00000004455	AK2	protein_coding	438	285	0.627372	0.631725
ENSG00000004468	CD38	protein_coding	0	0	0	0
ENSG00000004478	FKBP4	protein_coding	1001	505	10.0037	7.80995
ENSG00000004487	KDM1A	protein_coding	1268	1039	2.06544	2.61904
ENSG00000004534	RBM6	protein_coding	324	436	0.211852	0.44117
ENSG00000004660	CAMKK1	protein_coding	50	82	0.15132	0.384036
ENSG00000004700	RECQL	protein_coding	358	441	1.14358	2.17998
ENSG00000004766	VPS50	protein_coding	193	207	0.156825	0.260292
ENSG00000004776	HSPB6	protein_coding	0	0	0	0
ENSG00000004777	ARHGAP33	protein_coding	6	11	0.0439341	0.124645
ENSG00000004779	NDUFAB1	protein_coding	2081	1219	14.1819	12.8558
ENSG00000004799	PDK4	protein_coding	13	11	0.1047	0.137097
ENSG00000004809	SLC22A16	protein_coding	0	0	0	0
ENSG00000004838	ZMYND10	protein_coding	2	1	0.0364422	0.0281972
ENSG00000004846	ABCB5	protein_coding	0	0	0	0
ENSG00000004848	ARX	protein_coding	0	0	0	0
ENSG00000004864	SLC25A13	protein_coding	852	565	0.441526	0.453103
ENSG00000004866	ST7	protein_coding	32	32	0.0120946	0.0187165
ENSG00000004897	CDC27	protein_coding	253	281	0.369142	0.63447
ENSG00000004939	SLC4A1	protein_coding	0	1	0	0.00819642
ENSG00000004948	CALCR	protein_coding	0	1	0	0.00107782
ENSG00000004961	HCCS	protein_coding	275	131	2.44328	1.80113
ENSG00000004975	DVL2	protein_coding	198	237	2.25089	4.16936
ENSG00000005001	PRSS22	protein_coding	0	0	0	0
ENSG00000005007	UPF1	protein_coding	767	1118	2.21113	4.98761
ENSG00000005020	SKAP2	protein_coding	184	190	0.0586707	0.0937539
ENSG00000005022	SLC25A5	protein_coding	3303	1860	118.369	103.151
ENSG00000005059	MCUB	protein_coding	61	84	0.0496667	0.105839
ENSG00000005073	HOXA11	protein_coding	71	63	2.00046	2.74691
ENSG00000005075	POLR2J	protein_coding	11	21	0.198805	0.587335
ENSG00000005100	DHX33	protein_coding	340	284	1.26395	1.63381
ENSG00000005102	MEOX1	protein_coding	0	7	0	0.0525598
ENSG00000005108	THSD7A	protein_coding	1	11	0.000226579	0.00385695
ENSG00000005156	LIG3	protein_coding	195	218	0.697624	1.20691
ENSG00000005175	RPAP3	protein_coding	808	583	1.88678	2.10673
ENSG00000005187	ACSM3	protein_coding	11	11	0.00614437	0.00950845
ENSG00000005189	AC004381.6	protein_coding	75	108	0.181505	0.404467
ENSG00000005194	CIAPIN1	protein_coding	305	172	1.64857	1.43869
ENSG00000005206	SPPL2B	protein_coding	27	56	0.107872	0.34623
ENSG00000005238	FAM214B	protein_coding	1	4	0.00855631	0.0529637
ENSG00000005243	COPZ2	protein_coding	1	1	0.00882027	0.0136494
ENSG00000005249	PRKAR2B	protein_coding	110	119	0.098246	0.164476
ENSG00000005302	MSL3	protein_coding	106	122	0.630419	1.12283
ENSG00000005339	CREBBP	protein_coding	525	500	0.352906	0.520118
ENSG00000005379	TSPOAP1	protein_coding	0	0	0	0
ENSG00000005381	MPO	protein_coding	0	0	0	0
ENSG00000005421	PON1	protein_coding	0	0	0	0
ENSG00000005436	GCFC2	protein_coding	434	213	0.769882	0.584718
ENSG00000005448	WDR54	protein_coding	111	127	2.84832	5.04315
ENSG00000005469	CROT	protein_coding	62	73	0.119891	0.218449
ENSG00000005471	ABCB4	protein_coding	10	16	0.0132899	0.032906
ENSG00000005483	KMT2E	protein_coding	90	160	0.0940072	0.258625
ENSG00000005486	RHBDD2	protein_coding	27	71	0.0609904	0.248192
ENSG00000005513	SOX8	protein_coding	9	13	0.182094	0.407033
ENSG00000005700	IBTK	protein_coding	1	3	0.00134552	0.00624659
ENSG00000005801	ZNF195	protein_coding	196	151	0.513241	0.611892
ENSG00000005810	MYCBP2	protein_coding	552	810	0.204547	0.464485
ENSG00000005812	FBXL3	protein_coding	387	276	1.1705	1.29182
ENSG00000005844	ITGAL	protein_coding	0	0	0	0
ENSG00000005882	PDK2	protein_coding	59	64	0.3545	0.595082
ENSG00000005884	ITGA3	protein_coding	19	51	0.0576065	0.239288
ENSG00000005889	ZFX	protein_coding	302	311	0.471094	0.750746
ENSG00000005893	LAMP2	protein_coding	1545	1499	3.89211	5.84374
ENSG00000005961	ITGA2B	protein_coding	9	28	0.0543572	0.261701
ENSG00000005981	ASB4	protein_coding	0	0	0	0
ENSG00000006007	GDE1	protein_coding	152	95	0.777525	0.752016
ENSG00000006015	C19orf60	protein_coding	12	28	0.343845	1.24157
ENSG00000006016	CRLF1	protein_coding	2	5	0.00589176	0.0227939
ENSG00000006025	OSBPL7	protein_coding	7	16	0.0506469	0.179146
ENSG00000006042	TMEM98	protein_coding	111	88	0.675434	0.828658
ENSG00000006047	YBX2	protein_coding	0	11	0	0.279903
ENSG00000006059	KRT33A	protein_coding	0	0	0	0
ENSG00000006062	MAP3K14	protein_coding	13	18	0.0252294	0.054059
ENSG00000006071	ABCC8	protein_coding	2	19	0.00249267	0.0366455
ENSG00000006116	CACNG3	protein_coding	0	0	0	0
ENSG00000006118	TMEM132A	protein_coding	67	77	0.552187	0.982053
ENSG00000006125	AP2B1	protein_coding	1249	1097	0.880941	1.19736
ENSG00000006128	TAC1	protein_coding	8	24	0.0977407	0.453763
ENSG00000006194	ZNF263	protein_coding	42	51	0.116883	0.219636
ENSG00000006210	CX3CL1	protein_coding	0	0	0	0
ENSG00000006282	SPATA20	protein_coding	25	62	0.204462	0.784687
ENSG00000006283	CACNA1G	protein_coding	1	16	0.00157579	0.0390168
ENSG00000006327	TNFRSF12A	protein_coding	26	32	0.690717	1.31556
ENSG00000006377	DLX6	protein_coding	9	18	0.171484	0.530747
ENSG00000006432	MAP3K9	protein_coding	15	32	0.0180401	0.0595567
ENSG00000006451	RALA	protein_coding	206	209	0.25468	0.399858
ENSG00000006453	BAIAP2L1	protein_coding	1286	2371	1.22989	3.50904
ENSG00000006459	KDM7A	protein_coding	195	245	0.221102	0.429889
ENSG00000006468	ETV1	protein_coding	10	3	0.0104437	0.0048485
ENSG00000006530	AGK	protein_coding	249	194	0.250406	0.301912
ENSG00000006534	ALDH3B1	protein_coding	0	4	0	0.0312846
ENSG00000006555	TTC22	protein_coding	0	0	0	0
ENSG00000006576	PHTF2	protein_coding	98	133	0.0646144	0.135702
ENSG00000006606	CCL26	protein_coding	1	0	0.00513866	0
ENSG00000006607	FARP2	protein_coding	287	257	0.216688	0.300274
ENSG00000006611	USH1C	protein_coding	15	39	0.0310687	0.125006
ENSG00000006625	GGCT	protein_coding	127	176	1.61597	3.46557
ENSG00000006634	DBF4	protein_coding	181	123	0.56834	0.597678
ENSG00000006638	TBXA2R	protein_coding	0	1	0	0.0131282
ENSG00000006652	IFRD1	protein_coding	87	259	0.15683	0.722508
ENSG00000006659	LGALS14	protein_coding	0	0	0	0
ENSG00000006695	COX10	protein_coding	75	61	0.0563886	0.0709728
ENSG00000006704	GTF2IRD1	protein_coding	57	77	0.0400812	0.0837894
ENSG00000006712	PAF1	protein_coding	523	320	10.2411	9.69681
ENSG00000006715	VPS41	protein_coding	291	298	0.145399	0.230419
ENSG00000006740	ARHGAP44	protein_coding	8	31	0.00414215	0.0248388
ENSG00000006744	ELAC2	protein_coding	408	306	1.65502	1.92087
ENSG00000006747	SCIN	protein_coding	6	7	0.00700715	0.0126509
ENSG00000006756	ARSD	protein_coding	0	0	0	0
ENSG00000006757	PNPLA4	protein_coding	3	12	0.0106443	0.0658882
ENSG00000006788	MYH13	protein_coding	0	0	0	0
ENSG00000006831	ADIPOR2	protein_coding	238	175	0.248791	0.283092
ENSG00000006837	CDKL3	protein_coding	14	5	0.0172969	0.00955965
ENSG00000007001	UPP2	protein_coding	0	0	0	0
ENSG00000007038	PRSS21	protein_coding	0	0	0	0
ENSG00000007047	MARK4	protein_coding	58	88	0.0268559	0.0630561
ENSG00000007062	PROM1	protein_coding	0	0	0	0
ENSG00000007080	CCDC124	protein_coding	320	211	3.05083	3.11303
ENSG00000007129	CEACAM21	protein_coding	0	0	0	0
ENSG00000007168	PAFAH1B1	protein_coding	719	456	0.81422	0.799116
ENSG00000007171	NOS2	protein_coding	8	13	0.0191418	0.0481359
ENSG00000007174	DNAH9	protein_coding	0	0	0	0
ENSG00000007202	KIAA0100	protein_coding	165	309	0.556705	1.61336
ENSG00000007216	SLC13A2	protein_coding	0	0	0	0
ENSG00000007237	GAS7	protein_coding	8	18	0.00290734	0.010123
ENSG00000007255	TRAPPC6A	protein_coding	17	58	0.116195	0.613477
ENSG00000007264	MATK	protein_coding	39	67	0.16892	0.449079
ENSG00000007306	CEACAM7	protein_coding	0	0	0	0
ENSG00000007312	CD79B	protein_coding	0	0	0	0
ENSG00000007314	SCN4A	protein_coding	7	17	0.0213155	0.0801083
ENSG00000007341	ST7L	protein_coding	82	129	0.0881816	0.214677
ENSG00000007350	TKTL1	protein_coding	0	3	0	0.0140084
ENSG00000007372	PAX6	protein_coding	71	119	0.223988	0.580961
ENSG00000007376	RPUSD1	protein_coding	127	152	3.88135	7.18878
ENSG00000007384	RHBDF1	protein_coding	8	19	0.0457534	0.168159
ENSG00000007392	LUC7L	protein_coding	239	143	0.617603	0.571847
ENSG00000007402	CACNA2D2	protein_coding	119	150	0.0880378	0.17173
ENSG00000007516	BAIAP3	protein_coding	3	23	0.0198176	0.23512
ENSG00000007520	TSR3	protein_coding	34	42	1.33154	2.54541
ENSG00000007541	PIGQ	protein_coding	17	64	0.103777	0.604594
ENSG00000007545	CRAMP1	protein_coding	5	11	0.00797783	0.0271606
ENSG00000007866	TEAD3	protein_coding	26	45	0.115875	0.310356
ENSG00000007908	SELE	protein_coding	0	1	0	0.00384968
ENSG00000007923	DNAJC11	protein_coding	694	486	1.07181	1.16152
ENSG00000007933	FMO3	protein_coding	0	1	0	0.00601034
ENSG00000007944	MYLIP	protein_coding	34	38	0.186043	0.321773
ENSG00000007952	NOX1	protein_coding	0	0	0	0
ENSG00000007968	E2F2	protein_coding	0	0	0	0
ENSG00000008018	PSMB1	protein_coding	5366	3221	30.8103	28.6199
ENSG00000008056	SYN1	protein_coding	5	6	0.0109104	0.0202607
ENSG00000008083	JARID2	protein_coding	112	186	0.0425034	0.109232
ENSG00000008086	CDKL5	protein_coding	4	24	0.00183547	0.0170425
ENSG00000008118	CAMK1G	protein_coding	0	0	0	0
ENSG00000008128	CDK11A	protein_coding	2	4	0.00969147	0.0299952
ENSG00000008130	NADK	protein_coding	96	165	0.343728	0.914239
ENSG00000008196	TFAP2B	protein_coding	0	0	0	0
ENSG00000008197	TFAP2D	protein_coding	0	0	0	0
ENSG00000008226	DLEC1	protein_coding	0	0	0	0
ENSG00000008256	CYTH3	protein_coding	106	82	0.100048	0.11977
ENSG00000008277	ADAM22	protein_coding	57	76	0.0221944	0.0457947
ENSG00000008282	SYPL1	protein_coding	470	221	2.22807	1.62127
ENSG00000008283	CYB561	protein_coding	13	18	0.0966513	0.207095
ENSG00000008294	SPAG9	protein_coding	621	810	0.409496	0.826561
ENSG00000008300	CELSR3	protein_coding	83	202	0.328409	1.23686
ENSG00000008311	AASS	protein_coding	210	215	0.320179	0.507276
ENSG00000008323	PLEKHG6	protein_coding	0	0	0	0
ENSG00000008324	SS18L2	protein_coding	94	64	0.740979	0.780712
ENSG00000008382	MPND	protein_coding	19	26	0.120062	0.254248
ENSG00000008394	MGST1	protein_coding	496	435	0.198015	0.268743
ENSG00000008405	CRY1	protein_coding	223	159	0.227739	0.251283
ENSG00000008438	PGLYRP1	protein_coding	0	0	0	0
ENSG00000008441	NFIX	protein_coding	42	63	0.0425921	0.0988672
ENSG00000008513	ST3GAL1	protein_coding	5	14	0.0044684	0.0193616
ENSG00000008516	MMP25	protein_coding	0	0	0	0
ENSG00000008517	IL32	protein_coding	1	5	0.0061934	0.0479216
ENSG00000008710	PKD1	protein_coding	33	205	0.0731789	0.703491
ENSG00000008735	MAPK8IP2	protein_coding	199	223	1.56607	2.71579
ENSG00000008838	MED24	protein_coding	329	353	0.817393	1.35719
ENSG00000008853	RHOBTB2	protein_coding	11	9	0.0351121	0.0444569
ENSG00000008869	HEATR5B	protein_coding	329	322	0.296893	0.449669
ENSG00000008952	SEC62	protein_coding	1068	594	3.5212	3.03067
ENSG00000008988	RPS20	protein_coding	672	493	9.65013	10.9558
ENSG00000009307	CSDE1	protein_coding	4824	3689	12.087	14.3038
ENSG00000009335	UBE3C	protein_coding	413	498	0.331273	0.618155
ENSG00000009413	REV3L	protein_coding	105	173	0.0594927	0.151688
ENSG00000009694	TENM1	protein_coding	7	104	0.00124594	0.028646
ENSG00000009709	PAX7	protein_coding	1	4	0.000887856	0.00549585
ENSG00000009724	MASP2	protein_coding	1	1	0.00505256	0.00781887
ENSG00000009765	IYD	protein_coding	0	0	0	0
ENSG00000009780	FAM76A	protein_coding	79	82	0.222562	0.357495
ENSG00000009790	TRAF3IP3	protein_coding	0	0	0	0
ENSG00000009830	POMT2	protein_coding	46	73	0.104805	0.257384
ENSG00000009844	VTA1	protein_coding	629	442	0.848995	0.923228
ENSG00000009950	MLXIPL	protein_coding	29	50	0.0967995	0.258272
ENSG00000009954	BAZ1B	protein_coding	1412	1340	1.80453	2.65013
ENSG00000010017	RANBP9	protein_coding	284	245	0.329963	0.4405
ENSG00000010030	ETV7	protein_coding	0	0	0	0
ENSG00000010072	SPRTN	protein_coding	429	267	2.50514	2.41278
ENSG00000010165	METTL13	protein_coding	186	130	0.601475	0.650549
ENSG00000010219	DYRK4	protein_coding	27	28	0.0532096	0.0853919
ENSG00000010244	ZNF207	protein_coding	194	128	0.638834	0.652272
ENSG00000010256	UQCRC1	protein_coding	2152	1712	18.8053	23.1512
ENSG00000010270	STARD3NL	protein_coding	152	126	0.303257	0.389018
ENSG00000010278	CD9	protein_coding	479	321	1.30001	1.34818
ENSG00000010282	HHATL	protein_coding	0	0	0	0
ENSG00000010292	NCAPD2	protein_coding	824	835	2.23384	3.50303
ENSG00000010295	IFFO1	protein_coding	65	78	0.384089	0.713257
ENSG00000010310	GIPR	protein_coding	4	7	0.027038	0.0732224
ENSG00000010318	PHF7	protein_coding	14	25	0.112823	0.311776
ENSG00000010319	SEMA3G	protein_coding	16	14	0.139142	0.188408
ENSG00000010322	NISCH	protein_coding	196	414	0.540395	1.7664
ENSG00000010327	STAB1	protein_coding	2	1	0.0071777	0.00555376
ENSG00000010361	FUZ	protein_coding	134	236	1.33444	3.63695
ENSG00000010379	SLC6A13	protein_coding	0	1	0	0.00383255
ENSG00000010404	IDS	protein_coding	15	52	0.0355874	0.190915
ENSG00000010438	PRSS3	protein_coding	0	0	0	0
ENSG00000010539	ZNF200	protein_coding	141	124	1.06172	1.44493
ENSG00000010610	CD4	protein_coding	0	2	0	0.00953943
ENSG00000010626	LRRC23	protein_coding	23	27	0.0591716	0.107493
ENSG00000010671	BTK	protein_coding	1	1	0.00253068	0.00391624
ENSG00000010704	HFE	protein_coding	0	0	0	0
ENSG00000010803	SCMH1	protein_coding	41	101	0.0199595	0.0760885
ENSG00000010810	FYN	protein_coding	393	538	0.192965	0.408791
ENSG00000010818	HIVEP2	protein_coding	60	73	0.0324083	0.0610183
ENSG00000010932	FMO1	protein_coding	0	0	0	0
ENSG00000011007	TCEB3	protein_coding	213	183	1.17901	1.56754
ENSG00000011009	LYPLA2	protein_coding	41	19	0.938816	0.67326
ENSG00000011021	CLCN6	protein_coding	36	37	0.101681	0.161722
ENSG00000011028	MRC2	protein_coding	43	158	0.067974	0.386513
ENSG00000011052	NME1-NME2	protein_coding	0	0	0	0
ENSG00000011083	SLC6A7	protein_coding	0	0	0	0
ENSG00000011105	TSPAN9	protein_coding	48	50	0.0240089	0.0387019
ENSG00000011114	BTBD7	protein_coding	0	0	0	0
ENSG00000011132	APBA3	protein_coding	13	43	0.125022	0.639948
ENSG00000011143	MKS1	protein_coding	110	156	0.812393	1.78291
ENSG00000011198	ABHD5	protein_coding	117	95	0.276629	0.34759
ENSG00000011201	ANOS1	protein_coding	0	0	0	0
ENSG00000011243	AKAP8L	protein_coding	117	149	0.313176	0.617193
ENSG00000011258	MBTD1	protein_coding	101	166	0.127739	0.324895
ENSG00000011260	UTP18	protein_coding	644	619	1.80145	2.67954
ENSG00000011275	RNF216	protein_coding	251	222	0.162441	0.222335
ENSG00000011295	TTC19	protein_coding	117	201	0.268282	0.713237
ENSG00000011304	PTBP1	protein_coding	1174	1133	8.05426	12.0287
ENSG00000011332	DPF1	protein_coding	23	49	0.128644	0.424122
ENSG00000011347	SYT7	protein_coding	14	28	0.0222524	0.0688715
ENSG00000011376	LARS2	protein_coding	429	278	0.278979	0.279763
ENSG00000011405	PIK3C2A	protein_coding	422	501	0.339027	0.622862
ENSG00000011422	PLAUR	protein_coding	31	37	0.132661	0.245027
ENSG00000011426	ANLN	protein_coding	736	521	1.20367	1.31855
ENSG00000011451	WIZ	protein_coding	98	126	0.342155	0.680769
ENSG00000011454	RABGAP1	protein_coding	370	311	0.236037	0.307024
ENSG00000011465	DCN	protein_coding	0	0	0	0
ENSG00000011478	QPCTL	protein_coding	99	72	0.900297	1.01325
ENSG00000011485	PPP5C	protein_coding	440	486	1.0012	1.71134
ENSG00000011523	CEP68	protein_coding	63	77	0.215169	0.406969
ENSG00000011566	MAP4K3	protein_coding	122	158	0.0678901	0.136062
ENSG00000011590	ZBTB32	protein_coding	0	0	0	0
ENSG00000011600	TYROBP	protein_coding	0	0	0	0
ENSG00000011638	TMEM159	protein_coding	30	42	0.141156	0.305816
ENSG00000011677	GABRA3	protein_coding	0	0	0	0
ENSG00000012048	BRCA1	protein_coding	518	638	0.430369	0.820284
ENSG00000012061	ERCC1	protein_coding	105	94	0.153681	0.212908
ENSG00000012124	CD22	protein_coding	0	0	0	0
ENSG00000012171	SEMA3B	protein_coding	4	39	0.0419035	0.632248
ENSG00000012174	MBTPS2	protein_coding	360	482	0.822724	1.70463
ENSG00000012211	PRICKLE3	protein_coding	39	13	0.362282	0.186878
ENSG00000012223	LTF	protein_coding	0	0	0	0
ENSG00000012232	EXTL3	protein_coding	65	108	0.0438458	0.112738
ENSG00000012504	NR1H4	protein_coding	0	0	0	0
ENSG00000012660	ELOVL5	protein_coding	462	363	0.591149	0.718777
ENSG00000012779	ALOX5	protein_coding	0	0	0	0
ENSG00000012817	KDM5D	protein_coding	2	5	0.00509525	0.0197123
ENSG00000012822	CALCOCO1	protein_coding	75	158	0.408148	1.33059
ENSG00000012963	UBR7	protein_coding	1	2	0.00472219	0.0146152
ENSG00000012983	MAP4K5	protein_coding	159	245	0.116657	0.278171
ENSG00000013016	EHD3	protein_coding	12	13	0.0357644	0.0599578
ENSG00000013275	PSMC4	protein_coding	3	3	0.0300787	0.0465469
ENSG00000013288	MAN2B2	protein_coding	31	50	0.0673187	0.168026
ENSG00000013293	SLC7A14	protein_coding	0	0	0	0
ENSG00000013297	CLDN11	protein_coding	0	0	0	0
ENSG00000013306	SLC25A39	protein_coding	284	337	5.66504	10.4027
ENSG00000013364	MVP	protein_coding	1	7	0.00378513	0.0410026
ENSG00000013374	NUB1	protein_coding	1090	769	3.10363	3.38846
ENSG00000013375	PGM3	protein_coding	529	426	1.68837	2.10404
ENSG00000013392	RWDD2A	protein_coding	70	91	1.31888	2.65327
ENSG00000013441	CLK1	protein_coding	274	187	2.44311	2.58028
ENSG00000013503	POLR3B	protein_coding	350	234	0.240101	0.248413
ENSG00000013523	ANGEL1	protein_coding	144	216	0.376068	0.872952
ENSG00000013561	RNF14	protein_coding	229	216	0.749699	1.0943
ENSG00000013563	DNASE1L1	protein_coding	8	30	0.0769792	0.446722
ENSG00000013573	DDX11	protein_coding	54	125	0.182595	0.654089
ENSG00000013583	HEBP1	protein_coding	303	330	1.24782	2.10307
ENSG00000013588	GPRC5A	protein_coding	22	19	0.0847754	0.113301
ENSG00000013619	MAMLD1	protein_coding	23	22	0.0157558	0.0233221
ENSG00000013725	CD6	protein_coding	0	0	0	0
ENSG00000013810	TACC3	protein_coding	520	406	2.29724	2.77563
ENSG00000014123	UFL1	protein_coding	464	486	1.44156	2.3366
ENSG00000014138	POLA2	protein_coding	397	436	0.947876	1.61094
ENSG00000014164	ZC3H3	protein_coding	14	13	0.0141139	0.0202813
ENSG00000014216	CAPN1	protein_coding	190	271	0.632368	1.39578
ENSG00000014257	ACPP	protein_coding	0	7	0	0.0222563
ENSG00000014641	MDH1	protein_coding	4790	3884	26.9645	33.8352
ENSG00000014824	SLC30A9	protein_coding	267	315	0.279438	0.510172
ENSG00000014914	MTMR11	protein_coding	1	10	0.0126872	0.196334
ENSG00000014919	COX15	protein_coding	456	488	2.35561	3.90113
ENSG00000015133	CCDC88C	protein_coding	92	83	0.0657049	0.0917319
ENSG00000015153	YAF2	protein_coding	56	47	0.0721272	0.0936787
ENSG00000015171	ZMYND11	protein_coding	106	88	0.0923021	0.118583
ENSG00000015285	WAS	protein_coding	1	7	0.00705526	0.0764264
ENSG00000015413	DPEP1	protein_coding	3	5	0.0124828	0.0321954
ENSG00000015475	BID	protein_coding	95	60	0.244657	0.239121
ENSG00000015479	MATR3.2	protein_coding	2	4	0.00554962	0.0171761
ENSG00000015520	NPC1L1	protein_coding	0	0	0	0
ENSG00000015532	XYLT2	protein_coding	64	105	0.392866	0.997439
ENSG00000015568	RGPD5	protein_coding	19	11	0.0306173	0.0274308
ENSG00000015592	STMN4	protein_coding	0	2	0	0.0140217
ENSG00000015676	NUDCD3	protein_coding	155	178	0.14513	0.257916
ENSG00000016082	ISL1	protein_coding	67	45	0.617829	0.642153
ENSG00000016391	CHDH	protein_coding	53	69	0.162853	0.328096
ENSG00000016402	IL20RA	protein_coding	0	0	0	0
ENSG00000016490	CLCA1	protein_coding	0	0	0	0
ENSG00000016602	CLCA4	protein_coding	0	0	0	0
ENSG00000016864	GLT8D1	protein_coding	173	188	1.56077	2.62472
ENSG00000017260	ATP2C1	protein_coding	436	487	0.274652	0.474742
ENSG00000017427	IGF1	protein_coding	0	0	0	0
ENSG00000017483	SLC38A5	protein_coding	0	0	0	0
ENSG00000017797	RALBP1	protein_coding	112	85	0.185715	0.218112
ENSG00000018189	RUFY3	protein_coding	119	152	0.120768	0.238715
ENSG00000018236	CNTN1	protein_coding	104	95	0.028641	0.0404866
ENSG00000018280	SLC11A1	protein_coding	1	1	0.00703913	0.0108931
ENSG00000018408	WWTR1	protein_coding	84	124	0.0400495	0.0914896
ENSG00000018510	AGPS	protein_coding	538	505	0.337811	0.490699
ENSG00000018607	ZNF806	unprocessed_pseudogene	2	0	0.0221985	0
ENSG00000018610	CXorf56	protein_coding	181	159	0.694809	0.944532
ENSG00000018625	ATP1A2	protein_coding	0	0	0	0
ENSG00000018699	TTC27	protein_coding	288	201	0.156136	0.168632
ENSG00000018869	ZNF582	protein_coding	15	10	0.088681	0.0914896
ENSG00000019102	VSIG2	protein_coding	0	1	0	0.0339704
ENSG00000019144	PHLDB1	protein_coding	77	163	0.156157	0.511554
ENSG00000019169	MARCO	protein_coding	0	1	0	0.0030848
ENSG00000019186	CYP24A1	protein_coding	0	0	0	0
ENSG00000019485	PRDM11	protein_coding	6	8	0.00450665	0.00929876
ENSG00000019505	SYT13	protein_coding	0	3	0	0.0105567
ENSG00000019549	SNAI2	protein_coding	123	43	3.17728	1.7189
ENSG00000019582	CD74	protein_coding	1	0	0.00926624	0
ENSG00000019991	HGF	protein_coding	0	2	0	0.00453395
ENSG00000019995	ZRANB1	protein_coding	177	143	0.402065	0.50268
ENSG00000020129	NCDN	protein_coding	124	121	1.32379	1.99901
ENSG00000020181	ADGRA2	protein_coding	10	38	0.0172378	0.101367
ENSG00000020219	CCT8L1P	processed_pseudogene	0	1	0	0.0967364
ENSG00000020256	ZFP64	protein_coding	179	175	0.12271	0.185651
ENSG00000020426	MNAT1	protein_coding	314	205	0.139696	0.141137
ENSG00000020577	SAMD4A	protein_coding	9	38	0.00416319	0.0272019
ENSG00000020633	RUNX3	protein_coding	5	13	0.00797455	0.0320857
ENSG00000020922	MRE11	protein_coding	388	458	0.518335	0.946841
ENSG00000021300	PLEKHB1	protein_coding	31	61	0.194926	0.593567
ENSG00000021355	SERPINB1	protein_coding	165	212	1.78462	3.54838
ENSG00000021461	CYP3A43	protein_coding	0	0	0	0
ENSG00000021488	SLC7A9	protein_coding	0	0	0	0
ENSG00000021574	SPAST	protein_coding	225	162	0.250405	0.279002
ENSG00000021645	NRXN3	protein_coding	52	44	0.00320479	0.00419644
ENSG00000021762	OSBPL5	protein_coding	15	55	0.0197133	0.111857
ENSG00000021776	AQR	protein_coding	546	587	0.483961	0.80517
ENSG00000021826	CPS1	protein_coding	156	197	0.0810442	0.158378
ENSG00000021852	C8B	protein_coding	0	0	0	0
ENSG00000022267	FHL1	protein_coding	781	547	1.26398	1.36997
ENSG00000022277	RTFDC1	protein_coding	692	434	1.42364	1.38171
ENSG00000022355	GABRA1	protein_coding	0	0	0	0
ENSG00000022556	NLRP2	protein_coding	0	0	0	0
ENSG00000022567	SLC45A4	protein_coding	34	33	0.0351778	0.0528368
ENSG00000022840	RNF10	protein_coding	115	170	0.272787	0.624033
ENSG00000022976	ZNF839	protein_coding	31	73	0.128088	0.466768
ENSG00000023041	ZDHHC6	protein_coding	76	93	0.35362	0.669636
ENSG00000023171	GRAMD1B	protein_coding	11	29	0.00427359	0.0174354
ENSG00000023191	RNH1	protein_coding	2	0	0.0163646	0
ENSG00000023228	NDUFS1	protein_coding	5	7	0.0116824	0.0253099
ENSG00000023287	RB1CC1	protein_coding	463	617	0.392664	0.809762
ENSG00000023318	ERP44	protein_coding	1216	575	1.06161	0.77684
ENSG00000023330	ALAS1	protein_coding	172	210	1.10816	2.09375
ENSG00000023445	BIRC3	protein_coding	0	1	0	0.00737618
ENSG00000023516	AKAP11	protein_coding	370	339	0.757471	1.07398
ENSG00000023572	GLRX2	protein_coding	237	133	2.5708	2.23257
ENSG00000023608	SNAPC1	protein_coding	66	116	0.202703	0.551322
ENSG00000023697	DERA	protein_coding	139	182	0.115339	0.233703
ENSG00000023734	STRAP	protein_coding	1856	1034	9.20991	7.94018
ENSG00000023839	ABCC2	protein_coding	3	5	0.00451953	0.0116567
ENSG00000023892	DEF6	protein_coding	16	8	0.0699957	0.0541594
ENSG00000023902	PLEKHO1	protein_coding	83	69	0.558979	0.719116
ENSG00000023909	GCLM	protein_coding	365	182	1.57492	1.21526
ENSG00000024048	UBR2	protein_coding	366	452	0.29588	0.565464
ENSG00000024422	EHD2	protein_coding	5	20	0.0175624	0.108712
ENSG00000024526	DEPDC1	protein_coding	211	209	0.957079	1.46705
ENSG00000024862	CCDC28A	protein_coding	69	90	0.364465	0.735667
ENSG00000025039	RRAGD	protein_coding	40	44	0.0878712	0.149579
ENSG00000025156	HSF2	protein_coding	388	308	1.20932	1.48557
ENSG00000025293	PHF20	protein_coding	194	201	0.113789	0.182443
ENSG00000025423	HSD17B6	protein_coding	45	41	0.132163	0.186343
ENSG00000025434	NR1H3	protein_coding	18	13	0.0908496	0.101537
ENSG00000025708	TYMP	protein_coding	0	2	0	0.0752319
ENSG00000025770	NCAPH2	protein_coding	134	168	0.91907	1.78314
ENSG00000025772	TOMM34	protein_coding	1763	622	10.0499	5.48699
ENSG00000025796	SEC63	protein_coding	320	399	0.370281	0.714474
ENSG00000025800	KPNA6	protein_coding	414	425	0.632159	1.00426
ENSG00000026025	VIM	protein_coding	2620	795	29.3697	13.7911
ENSG00000026036	RTEL1-TNFRSF6B	protein_coding	0	2	0	0.00822327
ENSG00000026103	FAS	protein_coding	29	19	0.120404	0.122076
ENSG00000026297	RNASET2	protein_coding	70	48	0.264557	0.280734
ENSG00000026508	CD44	protein_coding	2	1	0.00223758	0.00173133
ENSG00000026559	KCNG1	protein_coding	15	32	0.0806026	0.266097
ENSG00000026652	AGPAT4	protein_coding	162	178	0.117656	0.200056
ENSG00000026751	SLAMF7	protein_coding	0	0	0	0
ENSG00000026950	BTN3A1	protein_coding	21	30	0.1693	0.374276
ENSG00000027001	MIPEP	protein_coding	224	208	0.147209	0.211534
ENSG00000027075	PRKCH	protein_coding	21	53	0.0060468	0.0236164
ENSG00000027644	INSRR	protein_coding	0	0	0	0
ENSG00000027697	IFNGR1	protein_coding	364	243	1.73406	1.79143
ENSG00000027847	B4GALT7	protein_coding	31	36	0.316545	0.568864
ENSG00000027869	SH2D2A	protein_coding	8	12	0.0788276	0.182979
ENSG00000028116	VRK2	protein_coding	183	127	0.0759099	0.0815236
ENSG00000028137	TNFRSF1B	protein_coding	0	0	0	0
ENSG00000028203	VEZT	protein_coding	167	160	0.205485	0.304661
ENSG00000028277	POU2F2	protein_coding	0	7	0	0.0102607
ENSG00000028310	BRD9	protein_coding	108	131	0.265705	0.498747
ENSG00000028528	SNX1	protein_coding	260	317	0.52354	0.987799
ENSG00000028839	TBPL1	protein_coding	94	64	0.257076	0.270861
ENSG00000029153	ARNTL2	protein_coding	11	31	0.0124527	0.0543082
ENSG00000029363	BCLAF1	protein_coding	605	459	1.91911	2.25314
ENSG00000029364	SLC39A9	protein_coding	153	119	0.24871	0.299352
ENSG00000029534	ANK1	protein_coding	14	31	0.00601541	0.0206125
ENSG00000029559	IBSP	protein_coding	0	0	0	0
ENSG00000029639	TFB1M	protein_coding	290	234	0.532538	0.664968
ENSG00000029725	RABEP1	protein_coding	361	328	0.36482	0.512953
ENSG00000029993	HMGB3	protein_coding	448	386	4.56612	6.0882
ENSG00000030066	NUP160	protein_coding	1215	999	1.80423	2.29569
ENSG00000030110	BAK1	protein_coding	50	25	0.675382	0.522579
ENSG00000030304	MUSK	protein_coding	0	0	0	0
ENSG00000030419	IKZF2	protein_coding	4	20	0.00274049	0.0212046
ENSG00000030582	GRN	protein_coding	391	495	5.10361	9.99858
ENSG00000031003	FAM13B	protein_coding	108	152	0.0991343	0.215912
ENSG00000031081	ARHGAP31	protein_coding	18	16	0.0149086	0.0205077
ENSG00000031691	CENPQ	protein_coding	165	146	0.580767	0.795249
ENSG00000031698	SARS	protein_coding	1047	1763	4.51764	11.772
ENSG00000031823	RANBP3	protein_coding	146	181	0.246403	0.47272
ENSG00000032219	ARID4A	protein_coding	171	231	0.236998	0.495442
ENSG00000032389	TSSC1	protein_coding	63	92	0.034889	0.0788438
ENSG00000032444	PNPLA6	protein_coding	62	91	0.233706	0.530825
ENSG00000032742	IFT88	protein_coding	62	65	0.0521666	0.0846343
ENSG00000033011	ALG1	protein_coding	105	66	0.205683	0.200071
ENSG00000033030	ZCCHC8	protein_coding	347	277	1.23198	1.5219
ENSG00000033050	ABCF2	protein_coding	644	480	3.47481	4.00792
ENSG00000033100	CHPF2	protein_coding	77	106	1.27111	2.70789
ENSG00000033122	LRRC7	protein_coding	0	1	0	0.000277504
ENSG00000033170	FUT8	protein_coding	80	80	0.0250997	0.0388419
ENSG00000033178	UBA6	protein_coding	510	438	0.60284	0.801196
ENSG00000033327	GAB2	protein_coding	14	29	0.00721495	0.0231279
ENSG00000033627	ATP6V0A1	protein_coding	633	715	1.03876	1.81572
ENSG00000033800	PIAS1	protein_coding	333	281	0.241276	0.315071
ENSG00000033867	SLC4A7	protein_coding	297	294	0.278238	0.426225
ENSG00000034053	APBA2	protein_coding	0	2	0	0.00138506
ENSG00000034152	MAP2K3	protein_coding	207	191	0.708601	1.01181
ENSG00000034239	EFCAB1	protein_coding	1	0	0.00426716	0
ENSG00000034510	TMSB10	protein_coding	828	840	82.4405	129.426
ENSG00000034533	ASTE1	protein_coding	67	31	0.508974	0.364431
ENSG00000034677	RNF19A	protein_coding	88	73	0.116331	0.149337
ENSG00000034693	PEX3	protein_coding	201	171	0.536511	0.706335
ENSG00000034713	GABARAPL2	protein_coding	837	530	7.59576	7.4431
ENSG00000034971	MYOC	protein_coding	0	0	0	0
ENSG00000035115	SH3YL1	protein_coding	15	27	0.0322516	0.0898373
ENSG00000035141	FAM136A	protein_coding	89	72	1.52277	1.90638
ENSG00000035403	VCL	protein_coding	852	829	0.706631	1.064
ENSG00000035499	DEPDC1B	protein_coding	178	167	0.180352	0.261848
ENSG00000035664	DAPK2	protein_coding	4	7	0.00253685	0.00687012
ENSG00000035681	NSMAF	protein_coding	67	113	0.0918396	0.239699
ENSG00000035687	ADSS	protein_coding	1194	623	2.86301	2.31174
ENSG00000035720	STAP1	protein_coding	0	0	0	0
ENSG00000035862	TIMP2	protein_coding	15	21	0.021677	0.0469634
ENSG00000035928	RFC1	protein_coding	405	579	0.537008	1.18806
ENSG00000036054	TBC1D23	protein_coding	219	217	0.356673	0.546913
ENSG00000036257	CUL3	protein_coding	1182	1109	1.07324	1.55827
ENSG00000036448	MYOM2	protein_coding	0	0	0	0
ENSG00000036473	OTC	protein_coding	0	0	0	0
ENSG00000036530	CYP46A1	protein_coding	0	2	0	0.00753229
ENSG00000036549	ZZZ3	protein_coding	355	368	0.307002	0.492485
ENSG00000036565	SLC18A1	protein_coding	0	0	0	0
ENSG00000036672	USP2	protein_coding	108	83	0.426279	0.506968
ENSG00000036828	CASR.1	protein_coding	0	0	0	0
ENSG00000037042	TUBG2	protein_coding	10	28	0.135866	0.588708
ENSG00000037241	RPL26L1	protein_coding	130	58	1.23188	0.850523
ENSG00000037280	FLT4	protein_coding	112	177	0.243565	0.595665
ENSG00000037474	NSUN2	protein_coding	1087	690	3.34031	3.28125
ENSG00000037637	FBXO42	protein_coding	95	85	0.0941254	0.130327
ENSG00000037749	MFAP3	protein_coding	248	131	0.142927	0.116833
ENSG00000037757	MRI1	protein_coding	162	129	1.73852	2.14233
ENSG00000037897	METTL1	protein_coding	148	84	3.58253	3.14658
ENSG00000037965	HOXC8	protein_coding	15	15	0.481933	0.745794
ENSG00000038002	AGA	protein_coding	223	227	1.98871	3.13274
ENSG00000038210	PI4K2B	protein_coding	8	12	0.0185547	0.0430702
ENSG00000038219	BOD1L1	protein_coding	551	709	0.977497	1.94645
ENSG00000038274	MAT2B	protein_coding	282	235	1.81899	2.34575
ENSG00000038295	TLL1	protein_coding	10	19	0.00453714	0.0133404
ENSG00000038358	EDC4	protein_coding	256	239	2.33331	3.37104
ENSG00000038382	TRIO	protein_coding	162	411	0.0436434	0.171347
ENSG00000038427	VCAN	protein_coding	948	708	0.895011	1.03439
ENSG00000038532	CLEC16A	protein_coding	179	333	0.0788012	0.226859
ENSG00000038945	MSR1	protein_coding	0	0	0	0
ENSG00000039068	CDH1	protein_coding	35	42	0.0372496	0.0691727
ENSG00000039123	SKIV2L2	protein_coding	892	886	0.79223	1.21773
ENSG00000039139	DNAH5	protein_coding	3	6	0.00123491	0.00382207
ENSG00000039319	ZFYVE16	protein_coding	423	325	0.620486	0.737747
ENSG00000039523	FAM65A	protein_coding	0	2	0	0.0114156
ENSG00000039537	C6	protein_coding	0	0	0	0
ENSG00000039560	RAI14	protein_coding	408	340	0.242045	0.312139
ENSG00000039600	SOX30	protein_coding	0	0	0	0
ENSG00000039650	PNKP	protein_coding	58	109	0.328605	0.955663
ENSG00000039987	BEST2	protein_coding	0	0	0	0
ENSG00000040199	PHLPP2	protein_coding	57	78	0.0686646	0.145407
ENSG00000040275	SPDL1	protein_coding	752	631	3.72154	4.83244
ENSG00000040341	STAU2	protein_coding	147	158	0.0469928	0.0781634
ENSG00000040487	PQLC2	protein_coding	30	46	0.184937	0.438827
ENSG00000040531	CTNS	protein_coding	76	67	0.317165	0.432692
ENSG00000040608	RTN4R	protein_coding	3	26	0.00750456	0.100649
ENSG00000040633	PHF23	protein_coding	302	142	6.73107	4.89776
ENSG00000040731	CDH10	protein_coding	7	5	0.00463966	0.00512851
ENSG00000040933	INPP4A	protein_coding	85	211	0.0594817	0.228496
ENSG00000041353	RAB27B	protein_coding	1	1	0.000589021	0.000911513
ENSG00000041357	PSMA4	protein_coding	4104	1753	35.7434	23.6267
ENSG00000041515	MYO16	protein_coding	0	0	0	0
ENSG00000041802	LSG1	protein_coding	303	193	1.00054	0.986235
ENSG00000041880	PARP3	protein_coding	6	20	0.0962535	0.49651
ENSG00000041982	TNC	protein_coding	7	26	0.00742304	0.0426667
ENSG00000041988	THAP3	protein_coding	24	11	0.234255	0.166151
ENSG00000042062	FAM65C	protein_coding	0	0	0	0
ENSG00000042088	TDP1	protein_coding	137	121	0.159592	0.218127
ENSG00000042286	AIFM2	protein_coding	23	33	0.0693364	0.15395
ENSG00000042304	C2orf83	protein_coding	0	0	0	0
ENSG00000042317	SPATA7	protein_coding	39	59	0.047773	0.111841
ENSG00000042429	MED17	protein_coding	397	254	1.36347	1.34996
ENSG00000042445	RETSAT	protein_coding	61	94	0.509316	1.21456
ENSG00000042493	CAPG	protein_coding	14	32	0.061854	0.218787
ENSG00000042753	AP2S1	protein_coding	677	387	5.51013	4.87435
ENSG00000042781	USH2A	protein_coding	0	0	0	0
ENSG00000042813	ZPBP	protein_coding	0	0	0	0
ENSG00000042832	TG	protein_coding	0	0	0	0
ENSG00000042980	ADAM28	protein_coding	0	0	0	0
ENSG00000043039	BARX2	protein_coding	10	8	0.0137076	0.01697
ENSG00000043093	DCUN1D1	protein_coding	281	189	0.614137	0.639224
ENSG00000043143	JADE2	protein_coding	26	27	0.0461775	0.0742085
ENSG00000043355	ZIC2	protein_coding	68	104	1.42258	3.36694
ENSG00000043462	LCP2	protein_coding	0	0	0	0
ENSG00000043514	TRIT1	protein_coding	103	90	0.253667	0.343005
ENSG00000043591	ADRB1	protein_coding	0	2	0	0.11352
ENSG00000044012	GUCA2B	protein_coding	0	0	0	0
ENSG00000044090	CUL7	protein_coding	60	142	0.384507	1.40823
ENSG00000044115	CTNNA1	protein_coding	921	807	0.297397	0.403258
ENSG00000044446	PHKA2	protein_coding	85	162	0.0963684	0.284226
ENSG00000044459	CNTLN	protein_coding	86	146	0.0243923	0.0640826
ENSG00000044524	EPHA3	protein_coding	70	39	0.0195538	0.0168589
ENSG00000044574	HSPA5	protein_coding	4792	2458	77.4085	61.4449
ENSG00000046604	DSG2	protein_coding	1319	1077	2.70818	3.422
ENSG00000046647	GEMIN8	protein_coding	64	69	0.30984	0.516939
ENSG00000046651	OFD1	protein_coding	113	202	0.341666	0.945165
ENSG00000046653	GPM6B	protein_coding	78	73	0.0486982	0.0705299
ENSG00000046774	MAGEC2	protein_coding	2	2	0.0710412	0.109937
ENSG00000046889	PREX2	protein_coding	62	68	0.0227715	0.0386493
ENSG00000047056	WDR37	protein_coding	58	79	0.0733365	0.154579
ENSG00000047188	YTHDC2	protein_coding	533	566	0.683493	1.1232
ENSG00000047230	CTPS2	protein_coding	168	171	0.140715	0.221646
ENSG00000047249	ATP6V1H	protein_coding	469	385	0.383415	0.487067
ENSG00000047315	POLR2B	protein_coding	2088	1922	4.08809	5.82338
ENSG00000047346	FAM214A	protein_coding	21	45	0.0171012	0.0567089
ENSG00000047365	ARAP2	protein_coding	27	34	0.00953589	0.0185827
ENSG00000047410	TPR	protein_coding	4253	4312	6.94934	10.9033
ENSG00000047457	CP	protein_coding	0	0	0	0
ENSG00000047578	KIAA0556	protein_coding	57	101	0.0259067	0.0710381
ENSG00000047579	DTNBP1	protein_coding	289	285	0.215617	0.32905
ENSG00000047597	XK	protein_coding	5	5	0.0112831	0.0174606
ENSG00000047617	ANO2	protein_coding	1	0	0.00025254	0
ENSG00000047621	C12orf4	protein_coding	187	165	0.385348	0.526172
ENSG00000047634	SCML1	protein_coding	605	482	3.60943	4.45003
ENSG00000047644	WWC3	protein_coding	0	2	0	0.00251226
ENSG00000047648	ARHGAP6	protein_coding	0	0	0	0
ENSG00000047662	FAM184B	protein_coding	0	2	0	0.00212785
ENSG00000047849	MAP4	protein_coding	1059	942	0.464482	0.639376
ENSG00000047932	GOPC	protein_coding	334	208	0.826772	0.796774
ENSG00000047936	ROS1	protein_coding	0	1	0	0.00117724
ENSG00000048028	USP28	protein_coding	202	315	0.272057	0.656525
ENSG00000048052	HDAC9	protein_coding	3	2	0.000342918	0.000353779
ENSG00000048140	TSPAN17	protein_coding	33	30	0.295958	0.416361
ENSG00000048162	NOP16	protein_coding	178	59	3.69721	1.89644
ENSG00000048342	CC2D2A	protein_coding	25	41	0.0198651	0.0504158
ENSG00000048392	RRM2B	protein_coding	109	91	0.329496	0.425694
ENSG00000048405	ZNF800	protein_coding	77	87	0.0946445	0.165484
ENSG00000048462	TNFRSF17	protein_coding	0	0	0	0
ENSG00000048471	SNX29	protein_coding	53	70	0.00928137	0.01897
ENSG00000048540	LMO3	protein_coding	0	0	0	0
ENSG00000048544	MRPS10	protein_coding	264	195	2.49669	2.85383
ENSG00000048545	GUCA1A	protein_coding	0	0	0	0
ENSG00000048649	RSF1	protein_coding	732	664	0.475706	0.667772
ENSG00000048707	VPS13D	protein_coding	205	253	0.0760759	0.145293
ENSG00000048740	CELF2	protein_coding	64	82	0.0124419	0.024669
ENSG00000048828	FAM120A	protein_coding	272	244	0.248833	0.345432
ENSG00000048991	R3HDM1	protein_coding	137	172	0.073968	0.143709
ENSG00000049089	COL9A2	protein_coding	0	5	0	0.0467215
ENSG00000049130	KITLG	protein_coding	46	56	0.0546634	0.102982
ENSG00000049167	ERCC8	protein_coding	60	37	0.0881296	0.0841017
ENSG00000049192	ADAMTS6	protein_coding	3	9	0.000942212	0.00437424
ENSG00000049239	H6PD	protein_coding	20	87	0.0572402	0.385321
ENSG00000049245	VAMP3	protein_coding	268	204	2.7592	3.2502
ENSG00000049246	PER3	protein_coding	5	7	0.00859736	0.0186263
ENSG00000049247	UTS2	protein_coding	0	1	0	0.015526
ENSG00000049249	TNFRSF9	protein_coding	2	5	0.00767407	0.0296892
ENSG00000049283	EPN3	protein_coding	0	0	0	0
ENSG00000049323	LTBP1	protein_coding	136	195	0.0314483	0.069779
ENSG00000049449	RCN1	protein_coding	160	151	0.0570722	0.0833516
ENSG00000049540	ELN	protein_coding	0	0	0	0
ENSG00000049541	RFC2	protein_coding	607	681	2.76649	4.80309
ENSG00000049618	ARID1B	protein_coding	175	243	0.0422528	0.0907939
ENSG00000049656	CLPTM1L	protein_coding	7	4	0.0267768	0.0236784
ENSG00000049759	NEDD4L	protein_coding	64	88	0.0187505	0.0398977
ENSG00000049768	FOXP3	protein_coding	0	1	0	0.0112526
ENSG00000049769	PPP1R3F	protein_coding	6	18	0.0198571	0.092187
ENSG00000049860	HEXB	protein_coding	253	251	0.320422	0.491935
ENSG00000049883	PTCD2	protein_coding	66	113	0.143798	0.380996
ENSG00000050030	KIAA2022	protein_coding	12	9	0.0065186	0.00756568
ENSG00000050130	JKAMP	protein_coding	210	136	1.04803	1.05033
ENSG00000050165	DKK3	protein_coding	3	7	0.00672748	0.0242919
ENSG00000050327	ARHGEF5	protein_coding	0	0	0	0
ENSG00000050344	NFE2L3	protein_coding	38	42	0.113984	0.194959
ENSG00000050393	MCUR1	protein_coding	118	75	0.440809	0.433573
ENSG00000050405	LIMA1	protein_coding	614	448	0.596249	0.67324
ENSG00000050426	LETMD1	protein_coding	151	158	1.26785	2.05296
ENSG00000050438	SLC4A8	protein_coding	4	14	0.00336348	0.0182175
ENSG00000050555	LAMC3	protein_coding	8	25	0.0098036	0.0474098
ENSG00000050628	PTGER3	protein_coding	0	0	0	0
ENSG00000050730	TNIP3	protein_coding	3	4	0.00326811	0.00674322
ENSG00000050748	MAPK9	protein_coding	275	306	0.488101	0.840487
ENSG00000050767	COL23A1	protein_coding	5	4	0.00148246	0.0018353
ENSG00000050820	BCAR1	protein_coding	80	99	0.209985	0.40213
ENSG00000051009	FAM160A2	protein_coding	68	88	0.304392	0.609592
ENSG00000051108	HERPUD1	protein_coding	114	210	0.930819	2.65346
ENSG00000051128	HOMER3	protein_coding	8	11	0.0694096	0.147691
ENSG00000051180	RAD51	protein_coding	116	93	0.323129	0.400897
ENSG00000051341	POLQ	protein_coding	202	260	0.183466	0.365434
ENSG00000051382	PIK3CB	protein_coding	123	60	0.0706276	0.0533154
ENSG00000051523	CYBA	protein_coding	106	148	1.40943	3.04531
ENSG00000051596	THOC3	protein_coding	239	133	0.214111	0.184384
ENSG00000051620	HEBP2	protein_coding	350	294	1.96203	2.55046
ENSG00000051825	MPHOSPH9	protein_coding	367	381	0.418826	0.67286
ENSG00000052126	PLEKHA5	protein_coding	148	190	0.0627907	0.124744
ENSG00000052344	PRSS8	protein_coding	1	5	0.0241671	0.186994
ENSG00000052723	SIKE1	protein_coding	405	345	3.78163	4.98511
ENSG00000052749	RRP12	protein_coding	266	222	0.399249	0.51564
ENSG00000052795	FNIP2	protein_coding	28	50	0.0210926	0.0582875
ENSG00000052802	MSMO1	protein_coding	415	195	2.7949	2.03229
ENSG00000052841	TTC17	protein_coding	130	197	0.100026	0.234567
ENSG00000052850	ALX4	protein_coding	24	29	0.0505088	0.0944465
ENSG00000053108	FSTL4	protein_coding	2	9	0.000502961	0.00350251
ENSG00000053254	FOXN3	protein_coding	26	64	0.00550445	0.0209678
ENSG00000053328	METTL24	protein_coding	0	0	0	0
ENSG00000053371	AKR7A2	protein_coding	147	194	1.88006	3.83961
ENSG00000053372	MRTO4	protein_coding	468	308	5.70119	5.80634
ENSG00000053438	NNAT	protein_coding	0	1	0	0.0653234
ENSG00000053501	USE1	protein_coding	88	77	2.05367	2.7808
ENSG00000053524	MCF2L2	protein_coding	5	9	0.00208673	0.00581261
ENSG00000053702	NRIP2	protein_coding	1	2	0.0102622	0.0317616
ENSG00000053747	LAMA3	protein_coding	36	166	0.0141823	0.101201
ENSG00000053770	AP5M1	protein_coding	183	135	0.641878	0.73277
ENSG00000053900	ANAPC4	protein_coding	441	346	1.11776	1.35712
ENSG00000053918	KCNQ1	protein_coding	0	10	0	0.00400411
ENSG00000054116	TRAPPC3	protein_coding	1088	417	5.84337	3.4658
ENSG00000054118	THRAP3	protein_coding	732	808	0.946346	1.61653
ENSG00000054148	PHPT1	protein_coding	558	387	25.3434	27.2003
ENSG00000054179	ENTPD2	protein_coding	1	0	0.0175931	0
ENSG00000054219	LY75	protein_coding	0	0	0	0
ENSG00000054267	ARID4B	protein_coding	536	539	0.285315	0.443998
ENSG00000054277	OPN3	protein_coding	0	2	0	0.00371095
ENSG00000054282	SDCCAG8	protein_coding	0	4	0	0.00265406
ENSG00000054356	PTPRN	protein_coding	0	0	0	0
ENSG00000054392	HHAT	protein_coding	0	0	0	0
ENSG00000054523	KIF1B	protein_coding	598	704	0.366377	0.667471
ENSG00000054598	FOXC1	protein_coding	250	390	6.6635	16.0864
ENSG00000054611	TBC1D22A	protein_coding	49	49	0.0124129	0.019209
ENSG00000054654	SYNE2	protein_coding	253	419	0.0708924	0.181688
ENSG00000054690	PLEKHH1	protein_coding	39	94	0.072473	0.270316
ENSG00000054793	ATP9A	protein_coding	78	112	0.0474213	0.105373
ENSG00000054796	SPO11	protein_coding	0	0	0	0
ENSG00000054803	CBLN4	protein_coding	0	0	0	0
ENSG00000054938	CHRDL2	protein_coding	0	1	0	0.00463245
ENSG00000054965	FAM168A	protein_coding	44	83	0.0232891	0.0679845
ENSG00000054967	RELT	protein_coding	18	24	0.0888023	0.183229
ENSG00000054983	GALC	protein_coding	24	31	0.0161149	0.0322115
ENSG00000055044	NOP58	protein_coding	1380	784	3.80512	3.34532
ENSG00000055070	SZRD1	protein_coding	94	72	0.21585	0.255852
ENSG00000055118	KCNH2	protein_coding	3	16	0.00941181	0.0776791
ENSG00000055130	CUL1	protein_coding	2076	1234	2.10661	1.93778
ENSG00000055147	FAM114A2	protein_coding	152	105	0.325879	0.348365
ENSG00000055163	CYFIP2	protein_coding	265	339	0.214108	0.423856
ENSG00000055208	TAB2	protein_coding	217	194	0.117673	0.162798
ENSG00000055211	GINM1	protein_coding	349	227	1.43471	1.4441
ENSG00000055332	EIF2AK2	protein_coding	733	533	1.32577	1.49185
ENSG00000055483	USP36	protein_coding	143	182	0.276799	0.545171
ENSG00000055609	KMT2C	protein_coding	323	447	0.112261	0.240417
ENSG00000055732	MCOLN3	protein_coding	33	152	0.113526	0.809204
ENSG00000055813	CCDC85A	protein_coding	0	0	0	0
ENSG00000055917	PUM2	protein_coding	459	533	0.463875	0.83358
ENSG00000055950	MRPL43	protein_coding	558	422	3.23353	3.78432
ENSG00000055955	ITIH4	protein_coding	0	0	0	0
ENSG00000055957	ITIH1	protein_coding	0	0	0	0
ENSG00000056050	HPF1	protein_coding	253	216	0.9293	1.22778
ENSG00000056097	ZFR	protein_coding	798	795	0.923612	1.42392
ENSG00000056277	ZNF280C	protein_coding	446	473	0.705118	1.15723
ENSG00000056291	NPFFR2	protein_coding	2	4	0.0018001	0.00557134
ENSG00000056487	PHF21B	protein_coding	8	20	0.00649769	0.025138
ENSG00000056558	TRAF1	protein_coding	2	21	0.00781477	0.126981
ENSG00000056586	RC3H2	protein_coding	102	156	0.175594	0.415591
ENSG00000056736	IL17RB	protein_coding	44	52	0.239546	0.438099
ENSG00000056972	TRAF3IP2	protein_coding	20	25	0.0420045	0.0812527
ENSG00000056998	GYG2	protein_coding	57	73	0.110394	0.218789
ENSG00000057019	DCBLD2	protein_coding	126	109	0.124683	0.166915
ENSG00000057149	SERPINB3	protein_coding	0	0	0	0
ENSG00000057252	SOAT1	protein_coding	924	861	1.48831	2.14613
ENSG00000057294	PKP2	protein_coding	58	85	0.057206	0.129737
ENSG00000057468	MSH4	protein_coding	0	2	0	0.00278345
ENSG00000057593	F7	protein_coding	0	0	0	0
ENSG00000057608	GDI2	protein_coding	1723	1012	2.34431	2.1308
ENSG00000057657	PRDM1	protein_coding	1	0	0.0044303	0
ENSG00000057663	ATG5	protein_coding	131	97	0.0488888	0.0560199
ENSG00000057704	TMCC3	protein_coding	17	23	0.0213203	0.0446379
ENSG00000057757	PITHD1	protein_coding	171	164	1.82072	2.70224
ENSG00000057935	MTA3	protein_coding	200	309	0.0797653	0.19071
ENSG00000058056	USP13	protein_coding	130	164	0.0995534	0.194352
ENSG00000058063	ATP11B	protein_coding	136	158	0.111066	0.199678
ENSG00000058085	LAMC2	protein_coding	3	9	0.00535143	0.0248441
ENSG00000058091	CDK14	protein_coding	38	28	0.0053435	0.00609302
ENSG00000058262	SEC61A1	protein_coding	772	538	4.03058	4.34675
ENSG00000058272	PPP1R12A	protein_coding	595	575	0.384581	0.575137
ENSG00000058335	RASGRF1	protein_coding	1	5	0.000799863	0.00618896
ENSG00000058404	CAMK2B	protein_coding	1	25	0.00089113	0.0344757
ENSG00000058453	CROCC	protein_coding	24	37	0.0107923	0.0257476
ENSG00000058600	POLR3E	protein_coding	203	216	0.563033	0.927094
ENSG00000058668	ATP2B4	protein_coding	270	299	0.240415	0.412003
ENSG00000058673	ZC3H11A	protein_coding	206	449	0.368671	1.24351
ENSG00000058729	RIOK2	protein_coding	495	431	2.31306	3.11667
ENSG00000058799	YIPF1	protein_coding	72	32	0.197669	0.135953
ENSG00000058804	NDC1	protein_coding	622	397	0.88675	0.875858
ENSG00000058866	DGKG	protein_coding	0	1	0	0.00063116
ENSG00000059122	FLYWCH1	protein_coding	99	162	0.263794	0.668001
ENSG00000059145	UNKL	protein_coding	37	45	0.0751123	0.141369
ENSG00000059377	TBXAS1	protein_coding	8	11	0.00344116	0.00732218
ENSG00000059378	PARP12	protein_coding	0	0	0	0
ENSG00000059573	ALDH18A1	protein_coding	1349	773	2.78003	2.46518
ENSG00000059588	TARBP1	protein_coding	479	748	0.57095	1.37974
ENSG00000059691	GATB	protein_coding	120	131	0.138723	0.234354
ENSG00000059728	MXD1	protein_coding	16	14	0.0369945	0.0500931
ENSG00000059758	CDK17	protein_coding	152	172	0.130056	0.227744
ENSG00000059769	DNAJC25	protein_coding	39	40	0.177439	0.281629
ENSG00000059804	SLC2A3	protein_coding	9	49	0.0552501	0.465499
ENSG00000059915	PSD	protein_coding	1	0	0.00552997	0
ENSG00000060069	CTDP1	protein_coding	5	12	0.0068107	0.025295
ENSG00000060138	YBX3	protein_coding	835	810	3.60706	5.41482
ENSG00000060140	STYK1	protein_coding	1	2	0.00188956	0.0058482
ENSG00000060237	WNK1	protein_coding	475	715	0.31289	0.728847
ENSG00000060303	RPS17P5	processed_pseudogene	0	1	0	0.396904
ENSG00000060339	CCAR1	protein_coding	1407	1169	2.06308	2.65258
ENSG00000060491	OGFR	protein_coding	109	149	1.2444	2.6324
ENSG00000060558	GNA15	protein_coding	0	0	0	0
ENSG00000060566	CREB3L3	protein_coding	0	0	0	0
ENSG00000060642	PIGV	protein_coding	36	40	0.344758	0.592795
ENSG00000060656	PTPRU	protein_coding	127	247	0.147176	0.442959
ENSG00000060688	SNRNP40	protein_coding	982	615	2.76125	2.6761
ENSG00000060709	RIMBP2	protein_coding	2	1	0.00171855	0.00132974
ENSG00000060718	COL11A1	protein_coding	0	0	0	0
ENSG00000060749	QSER1	protein_coding	342	274	0.357384	0.443091
ENSG00000060762	MPC1	protein_coding	350	238	2.02405	2.12992
ENSG00000060971	ACAA1	protein_coding	302	324	0.926376	1.538
ENSG00000060982	BCAT1	protein_coding	389	494	0.291932	0.573708
ENSG00000061273	HDAC7	protein_coding	32	73	0.0664259	0.2345
ENSG00000061337	LZTS1	protein_coding	2	3	0.00362095	0.00840516
ENSG00000061455	PRDM6	protein_coding	27	24	0.026871	0.0369627
ENSG00000061492	WNT8A	protein_coding	0	0	0	0
ENSG00000061656	SPAG4	protein_coding	8	7	0.162301	0.219767
ENSG00000061676	NCKAP1	protein_coding	872	848	0.703302	1.05841
ENSG00000061794	MRPS35	protein_coding	595	322	1.36773	1.14543
ENSG00000061918	GUCY1B3	protein_coding	121	122	0.260533	0.406508
ENSG00000061936	SFSWAP	protein_coding	260	262	0.306883	0.478557
ENSG00000061938	TNK2	protein_coding	32	103	0.0689267	0.343326
ENSG00000061987	MON2	protein_coding	256	269	0.20042	0.325901
ENSG00000062038	CDH3	protein_coding	2	10	0.00242152	0.0187366
ENSG00000062096	ARSF	protein_coding	0	0	0	0
ENSG00000062194	GPBP1	protein_coding	412	428	0.475171	0.763886
ENSG00000062282	DGAT2	protein_coding	4	11	0.00996037	0.0423878
ENSG00000062370	ZNF112	protein_coding	3	9	0.00772031	0.0358417
ENSG00000062485	CS	protein_coding	780	682	2.84457	3.84892
ENSG00000062524	LTK	protein_coding	15	12	0.153137	0.189584
ENSG00000062582	MRPS24	protein_coding	4	4	0.125472	0.194169
ENSG00000062598	ELMO2	protein_coding	148	143	0.231371	0.345951
ENSG00000062650	WAPL	protein_coding	1056	839	1.27661	1.5696
ENSG00000062716	VMP1	protein_coding	2254	1730	1.74633	2.0742
ENSG00000062725	APPBP2	protein_coding	407	374	0.512693	0.729067
ENSG00000062822	POLD1	protein_coding	166	314	0.513702	1.50371
ENSG00000063015	SEZ6	protein_coding	0	0	0	0
ENSG00000063046	EIF4B	protein_coding	111	134	0.322186	0.601895
ENSG00000063127	SLC6A16	protein_coding	4	15	0.0117617	0.0682547
ENSG00000063169	GLTSCR1	protein_coding	23	71	0.0253129	0.120922
ENSG00000063176	SPHK2	protein_coding	10	29	0.0915758	0.410971
ENSG00000063177	RPL18	protein_coding	970	830	24.116	31.9333
ENSG00000063180	CA11	protein_coding	19	51	0.237514	0.986593
ENSG00000063241	ISOC2	protein_coding	71	72	0.793856	1.2458
ENSG00000063244	U2AF2	protein_coding	1337	760	6.80158	5.98308
ENSG00000063245	EPN1	protein_coding	129	214	0.389774	1.00062
ENSG00000063322	MED29	protein_coding	91	73	1.02009	1.26635
ENSG00000063438	AHRR	protein_coding	29	59	0.0226272	0.0712388
ENSG00000063515	GSC2	protein_coding	0	0	0	0
ENSG00000063587	ZNF275	protein_coding	48	85	0.193516	0.530306
ENSG00000063601	MTMR1	protein_coding	248	224	0.359775	0.502874
ENSG00000063660	GPC1	protein_coding	91	127	0.293834	0.634595
ENSG00000063761	ADCK1	protein_coding	32	53	0.0248173	0.0636081
ENSG00000063854	HAGH	protein_coding	73	87	0.241931	0.446191
ENSG00000063978	RNF4	protein_coding	119	115	0.076349	0.114179
ENSG00000064012	CASP8	protein_coding	57	78	0.10991	0.232749
ENSG00000064042	LIMCH1	protein_coding	39	26	0.0119878	0.0123675
ENSG00000064102	ASUN	protein_coding	721	709	2.27623	3.46386
ENSG00000064115	TM7SF3	protein_coding	119	112	0.301954	0.439789
ENSG00000064195	DLX3	protein_coding	2	5	0.0400933	0.155112
ENSG00000064199	SPA17	protein_coding	21	21	0.0926401	0.143361
ENSG00000064201	TSPAN32	protein_coding	0	2	0	0.0199872
ENSG00000064205	WISP2	protein_coding	1	2	0.00765722	0.0236992
ENSG00000064218	DMRT3	protein_coding	4	2	0.0283433	0.0219308
ENSG00000064225	ST3GAL6	protein_coding	30	41	0.0352866	0.0746285
ENSG00000064270	ATP2C2	protein_coding	0	1	0	0.00169282
ENSG00000064300	NGFR	protein_coding	1	3	0.00530513	0.0246291
ENSG00000064309	CDON	protein_coding	179	156	0.174179	0.234909
ENSG00000064313	TAF2	protein_coding	353	292	0.361833	0.463179
ENSG00000064393	HIPK2	protein_coding	141	241	0.068243	0.180505
ENSG00000064419	TNPO3	protein_coding	482	386	0.499418	0.618923
ENSG00000064489	BORCS8-MEF2B	protein_coding	0	0	0	0
ENSG00000064490	RFXANK	protein_coding	42	39	0.455869	0.65507
ENSG00000064545	TMEM161A	protein_coding	243	240	1.31447	2.00904
ENSG00000064547	LPAR2	protein_coding	4	14	0.0795315	0.430764
ENSG00000064601	CTSA	protein_coding	71	88	0.856252	1.64232
ENSG00000064607	SUGP2	protein_coding	273	550	0.662271	2.06475
ENSG00000064651	SLC12A2	protein_coding	391	308	0.386277	0.470875
ENSG00000064652	SNX24	protein_coding	8	28	0.00450284	0.0243886
ENSG00000064655	EYA2	protein_coding	21	19	0.00746893	0.0104574
ENSG00000064666	CNN2	protein_coding	124	84	1.03906	1.08926
ENSG00000064687	ABCA7	protein_coding	44	65	0.18076	0.413233
ENSG00000064692	SNCAIP	protein_coding	8	22	0.00547636	0.0233054
ENSG00000064703	DDX20	protein_coding	760	438	6.22684	5.55342
ENSG00000064726	BTBD1	protein_coding	375	388	0.770451	1.23361
ENSG00000064763	FAR2	protein_coding	166	152	0.0905307	0.128281
ENSG00000064787	BCAS1	protein_coding	0	2	0	0.00242025
ENSG00000064835	POU1F1	protein_coding	0	0	0	0
ENSG00000064886	CHI3L2	protein_coding	0	0	0	0
ENSG00000064932	SBNO2	protein_coding	1	1	0.00157009	0.00242973
ENSG00000064933	PMS1	protein_coding	234	231	0.261763	0.399886
ENSG00000064961	HMG20B	protein_coding	131	228	2.17179	5.84942
ENSG00000064989	CALCRL	protein_coding	9	7	0.00894118	0.0107617
ENSG00000064995	TAF11	protein_coding	68	47	0.690047	0.738074
ENSG00000064999	ANKS1A	protein_coding	128	150	0.06626	0.120161
ENSG00000065000	AP3D1	protein_coding	681	1001	1.12263	2.55362
ENSG00000065029	ZNF76	protein_coding	31	105	0.0874923	0.458596
ENSG00000065054	SLC9A3R2	protein_coding	81	100	0.620008	1.18453
ENSG00000065057	NTHL1	protein_coding	204	140	2.65118	2.81559
ENSG00000065060	UHRF1BP1	protein_coding	83	208	0.0953143	0.369637
ENSG00000065135	GNAI3	protein_coding	1002	655	1.50411	1.52155
ENSG00000065150	IPO5	protein_coding	3725	4862	5.51809	11.1458
ENSG00000065154	OAT	protein_coding	1868	1331	9.01884	9.94453
ENSG00000065183	WDR3	protein_coding	1032	741	2.93274	3.2587
ENSG00000065243	PKN2	protein_coding	702	626	0.48318	0.666774
ENSG00000065268	WDR18	protein_coding	267	241	1.97204	2.75457
ENSG00000065308	TRAM2	protein_coding	34	23	0.0447454	0.0468414
ENSG00000065320	NTN1	protein_coding	54	79	0.0254013	0.0575072
ENSG00000065325	GLP2R	protein_coding	0	0	0	0
ENSG00000065328	MCM10	protein_coding	1101	1047	2.32513	3.42168
ENSG00000065357	DGKA	protein_coding	31	59	0.121455	0.357717
ENSG00000065361	ERBB3	protein_coding	21	48	0.0929222	0.32868
ENSG00000065371	ROPN1	protein_coding	0	0	0	0
ENSG00000065413	ANKRD44	protein_coding	1	5	0.000304058	0.00235266
ENSG00000065427	KARS	protein_coding	827	609	4.08787	4.65845
ENSG00000065457	ADAT1	protein_coding	23	58	0.0914439	0.356851
ENSG00000065485	PDIA5	protein_coding	105	153	0.0694687	0.156648
ENSG00000065491	TBC1D22B	protein_coding	62	84	0.0862765	0.180889
ENSG00000065518	NDUFB4	protein_coding	219	162	3.70106	4.23671
ENSG00000065526	SPEN	protein_coding	1095	1476	1.23746	2.58128
ENSG00000065534	MYLK	protein_coding	31	50	0.011827	0.02952
ENSG00000065548	ZC3H15	protein_coding	1257	654	5.66775	4.56336
ENSG00000065559	MAP2K4	protein_coding	113	90	0.0961306	0.118483
ENSG00000065600	TMEM206	protein_coding	136	74	0.279208	0.235101
ENSG00000065609	SNAP91	protein_coding	13	79	0.00867515	0.0815817
ENSG00000065613	SLK	protein_coding	1079	873	1.82017	2.27896
ENSG00000065615	CYB5R4	protein_coding	110	85	0.106797	0.127708
ENSG00000065618	COL17A1	protein_coding	0	0	0	0
ENSG00000065621	GSTO2	protein_coding	7	10	0.0203062	0.0448914
ENSG00000065665	SEC61A2	protein_coding	200	149	0.519001	0.598352
ENSG00000065675	PRKCQ	protein_coding	76	104	0.0519259	0.10996
ENSG00000065717	TLE2	protein_coding	10	52	0.0209296	0.168421
ENSG00000065802	ASB1	protein_coding	37	51	0.151782	0.323759
ENSG00000065809	FAM107B	protein_coding	109	103	0.044496	0.0650675
ENSG00000065833	ME1	protein_coding	198	175	0.0938878	0.128415
ENSG00000065882	TBC1D1	protein_coding	51	63	0.0215117	0.0411224
ENSG00000065883	CDK13	protein_coding	264	275	0.187806	0.302741
ENSG00000065911	MTHFD2	protein_coding	773	1000	4.25645	8.52119
ENSG00000065923	SLC9A7	protein_coding	85	129	0.0556194	0.130626
ENSG00000065970	FOXJ2	protein_coding	73	42	0.335029	0.298291
ENSG00000065978	YBX1	protein_coding	280	316	1.47067	2.56849
ENSG00000065989	PDE4A	protein_coding	13	14	0.0257358	0.0428898
ENSG00000066027	PPP2R5A	protein_coding	162	165	0.222101	0.350067
ENSG00000066032	CTNNA2	protein_coding	0	0	0	0
ENSG00000066044	ELAVL1	protein_coding	1322	874	2.93832	3.00615
ENSG00000066056	TIE1	protein_coding	0	0	0	0
ENSG00000066084	DIP2B	protein_coding	333	305	0.142999	0.202684
ENSG00000066117	SMARCD1	protein_coding	243	340	1.61542	3.49777
ENSG00000066135	KDM4A	protein_coding	373	460	0.705085	1.34562
ENSG00000066136	NFYC	protein_coding	143	103	0.187153	0.208608
ENSG00000066185	ZMYND12	protein_coding	0	0	0	0
ENSG00000066230	SLC9A3	protein_coding	2	13	0.00410182	0.0412594
ENSG00000066248	NGEF	protein_coding	45	79	0.0349882	0.0950537
ENSG00000066279	ASPM	protein_coding	311	514	0.520149	1.33034
ENSG00000066294	CD84	protein_coding	0	0	0	0
ENSG00000066322	ELOVL1	protein_coding	181	116	4.04885	4.01553
ENSG00000066336	SPI1	protein_coding	0	1	0	0.00682787
ENSG00000066379	ZNRD1	protein_coding	0	0	0	0
ENSG00000066382	MPPED2	protein_coding	9	13	0.00465359	0.0104021
ENSG00000066405	CLDN18	protein_coding	1	0	0.00299658	0
ENSG00000066422	ZBTB11	protein_coding	228	233	0.834018	1.31895
ENSG00000066427	ATXN3	protein_coding	112	124	0.17243	0.295427
ENSG00000066455	GOLGA5	protein_coding	226	271	0.51712	0.959588
ENSG00000066468	FGFR2	protein_coding	141	115	0.122828	0.155028
ENSG00000066557	LRRC40	protein_coding	750	996	1.29049	2.65208
ENSG00000066583	ISOC1	protein_coding	118	106	0.64052	0.890408
ENSG00000066629	EML1	protein_coding	83	87	0.0424989	0.0689369
ENSG00000066651	TRMT11	protein_coding	258	196	0.510872	0.600594
ENSG00000066654	THUMPD1	protein_coding	195	128	0.519634	0.527844
ENSG00000066697	MSANTD3	protein_coding	45	56	0.191764	0.369297
ENSG00000066735	KIF26A	protein_coding	29	58	0.0719592	0.222715
ENSG00000066739	ATG2B	protein_coding	146	271	0.180443	0.518311
ENSG00000066777	ARFGEF1	protein_coding	287	330	0.17649	0.314039
ENSG00000066813	ACSM2B	protein_coding	0	0	0	0
ENSG00000066827	ZFAT	protein_coding	23	27	0.0102303	0.0185848
ENSG00000066855	MTFR1	protein_coding	187	123	0.154656	0.157421
ENSG00000066923	STAG3	protein_coding	2	5	0.00476454	0.0184329
ENSG00000066926	FECH	protein_coding	91	117	0.247404	0.492247
ENSG00000066933	MYO9A	protein_coding	183	246	0.0646321	0.134451
ENSG00000067048	DDX3Y	protein_coding	3	3	0.019176	0.029675
ENSG00000067057	PFKP	protein_coding	295	386	0.432472	0.875701
ENSG00000067064	IDI1	protein_coding	568	209	6.41667	3.65376
ENSG00000067066	SP100	protein_coding	0	0	0	0
ENSG00000067082	KLF6	protein_coding	90	76	1.01421	1.32535
ENSG00000067113	PLPP1	protein_coding	18	28	0.0170929	0.0411466
ENSG00000067141	NEO1	protein_coding	332	325	0.13705	0.207614
ENSG00000067167	TRAM1	protein_coding	540	359	1.617	1.66357
ENSG00000067177	PHKA1	protein_coding	211	231	0.162943	0.276057
ENSG00000067182	TNFRSF1A	protein_coding	93	106	0.728542	1.28502
ENSG00000067191	CACNB1	protein_coding	2	13	0.00863111	0.0868186
ENSG00000067208	EVI5	protein_coding	161	169	0.0593835	0.0964626
ENSG00000067221	STOML1	protein_coding	16	27	0.106643	0.27849
ENSG00000067225	PKM	protein_coding	16335	9761	52.124	48.1998
ENSG00000067248	DHX29	protein_coding	418	449	0.849704	1.41244
ENSG00000067334	DNTTIP2	protein_coding	1076	650	8.2573	7.71919
ENSG00000067365	METTL22	protein_coding	19	51	0.0710793	0.295251
ENSG00000067369	TP53BP1	protein_coding	565	554	0.549129	0.833237
ENSG00000067445	TRO	protein_coding	49	96	0.467415	1.41713
ENSG00000067533	RRP15	protein_coding	717	337	1.42379	1.03559
ENSG00000067560	RHOA	protein_coding	2532	1975	4.91993	5.93874
ENSG00000067596	DHX8	protein_coding	520	531	0.897947	1.41897
ENSG00000067601	PMS2P4	transcribed_unprocessed_pseudogene	8	7	0.114678	0.155282
ENSG00000067606	PRKCZ	protein_coding	50	80	0.0387782	0.0960151
ENSG00000067646	ZFY	protein_coding	0	0	0	0
ENSG00000067704	IARS2	protein_coding	1584	1610	3.07296	4.83348
ENSG00000067715	SYT1	protein_coding	43	78	0.0076523	0.0214808
ENSG00000067798	NAV3	protein_coding	0	2	0	0.000364571
ENSG00000067829	IDH3G	protein_coding	382	191	4.56427	3.53162
ENSG00000067836	ROGDI	protein_coding	9	29	0.157411	0.784918
ENSG00000067840	PDZD4	protein_coding	6	47	0.0221078	0.267994
ENSG00000067842	ATP2B3	protein_coding	3	8	0.00481017	0.01985
ENSG00000067900	ROCK1	protein_coding	681	719	0.432034	0.705882
ENSG00000067955	CBFB	protein_coding	341	205	0.495997	0.461435
ENSG00000067992	PDK3	protein_coding	235	249	0.329566	0.540389
ENSG00000068001	HYAL2	protein_coding	24	14	0.490805	0.443055
ENSG00000068024	HDAC4	protein_coding	17	38	0.00503255	0.0174083
ENSG00000068028	RASSF1	protein_coding	63	64	0.588673	0.925435
ENSG00000068078	FGFR3	protein_coding	71	118	0.477303	1.22758
ENSG00000068079	IFI35	protein_coding	5	7	0.0676692	0.146606
ENSG00000068097	HEATR6	protein_coding	179	174	0.524126	0.788432
ENSG00000068120	COASY	protein_coding	187	272	4.06742	9.15543
ENSG00000068137	PLEKHH3	protein_coding	53	103	0.610738	1.83674
ENSG00000068305	MEF2A	protein_coding	818	561	0.56669	0.601433
ENSG00000068308	OTUD5	protein_coding	125	170	0.359758	0.75715
ENSG00000068323	TFE3	protein_coding	72	67	0.510422	0.735029
ENSG00000068354	TBC1D25	protein_coding	53	63	0.239542	0.440634
ENSG00000068366	ACSL4	protein_coding	679	446	0.650907	0.661632
ENSG00000068383	INPP5A	protein_coding	113	113	0.0481343	0.0744882
ENSG00000068394	GPKOW	protein_coding	181	122	1.81893	1.89727
ENSG00000068400	GRIPAP1	protein_coding	141	213	0.516894	1.20836
ENSG00000068438	FTSJ1	protein_coding	116	106	1.1735	1.65944
ENSG00000068489	PRR11	protein_coding	107	76	0.227546	0.25011
ENSG00000068615	REEP1	protein_coding	87	67	0.0733655	0.0874339
ENSG00000068650	ATP11A	protein_coding	66	102	0.0350868	0.0839135
ENSG00000068654	POLR1A	protein_coding	467	461	0.568636	0.868662
ENSG00000068697	LAPTM4A	protein_coding	1022	658	5.51864	5.49844
ENSG00000068724	TTC7A	protein_coding	14	28	0.00915741	0.0283423
ENSG00000068745	IP6K2	protein_coding	639	599	1.27729	1.85288
ENSG00000068781	STON1-GTF2A1L	protein_coding	0	0	0	0
ENSG00000068784	SRBD1	protein_coding	327	361	0.153112	0.261579
ENSG00000068796	KIF2A	protein_coding	808	661	0.365887	0.463201
ENSG00000068831	RASGRP2	protein_coding	5	26	0.0282119	0.227022
ENSG00000068878	PSME4	protein_coding	519	403	0.508645	0.611202
ENSG00000068885	IFT80	protein_coding	47	114	0.0344186	0.129191
ENSG00000068903	SIRT2	protein_coding	0	0	0	0
ENSG00000068912	ERLEC1	protein_coding	79	102	0.26016	0.519812
ENSG00000068971	PPP2R5B	protein_coding	11	40	0.0680267	0.382806
ENSG00000068976	PYGM	protein_coding	1	2	0.00752345	0.0232852
ENSG00000068985	PAGE1	protein_coding	0	1	0	0.0189533
ENSG00000069011	PITX1	protein_coding	38	101	0.561726	2.31044
ENSG00000069018	TRPC7	protein_coding	0	0	0	0
ENSG00000069020	MAST4	protein_coding	17	34	0.00310334	0.00960487
ENSG00000069122	ADGRF5	protein_coding	0	2	0	0.00316184
ENSG00000069188	SDK2	protein_coding	108	146	0.0364911	0.0763393
ENSG00000069206	ADAM7	protein_coding	0	0	0	0
ENSG00000069248	NUP133	protein_coding	2253	1728	3.46291	4.11014
ENSG00000069275	NUCKS1	protein_coding	7413	6523	20.7091	28.1999
ENSG00000069329	VPS35	protein_coding	1037	874	3.25023	4.23915
ENSG00000069345	DNAJA2	protein_coding	1765	894	10.0231	7.85648
ENSG00000069399	BCL3	protein_coding	4	4	0.0339201	0.0524916
ENSG00000069424	KCNAB2	protein_coding	14	14	0.0133513	0.0206612
ENSG00000069431	ABCC9	protein_coding	4	5	0.00288416	0.00557906
ENSG00000069482	GAL	protein_coding	136	98	1.92396	2.14544
ENSG00000069493	CLEC2D	protein_coding	2	16	0.00605104	0.0749122
ENSG00000069509	FUNDC1	protein_coding	389	165	2.10228	1.37993
ENSG00000069535	MAOB	protein_coding	1	5	0.00090337	0.00698985
ENSG00000069667	RORA	protein_coding	17	32	0.00240061	0.00699288
ENSG00000069696	DRD4	protein_coding	0	0	0	0
ENSG00000069702	TGFBR3	protein_coding	133	129	0.0615842	0.0924357
ENSG00000069712	KIAA1107	protein_coding	0	0	0	0
ENSG00000069764	PLA2G10	protein_coding	0	0	0	0
ENSG00000069812	HES2	protein_coding	0	4	0	0.0528643
ENSG00000069849	ATP1B3	protein_coding	802	511	1.66546	1.64215
ENSG00000069869	NEDD4	protein_coding	87	136	0.0545721	0.132015
ENSG00000069943	PIGB	protein_coding	10	10	0.0285218	0.0441377
ENSG00000069956	MAPK6	protein_coding	58	68	0.0526545	0.095532
ENSG00000069966	GNB5	protein_coding	36	45	0.0493958	0.0955504
ENSG00000069974	RAB27A	protein_coding	23	11	0.0207219	0.0153365
ENSG00000069998	CECR5	protein_coding	236	254	0.889077	1.48079
ENSG00000070010	UFD1L	protein_coding	467	254	1.66753	1.40353
ENSG00000070018	LRP6	protein_coding	0	0	0	0
ENSG00000070019	GUCY2C	protein_coding	0	0	0	0
ENSG00000070031	SCT	protein_coding	0	0	0	0
ENSG00000070047	PHRF1	protein_coding	4	0	0.0117126	0
ENSG00000070061	IKBKAP	protein_coding	787	777	1.23655	1.88926
ENSG00000070081	NUCB2	protein_coding	692	540	0.510594	0.616588
ENSG00000070087	PFN2	protein_coding	1456	941	1.77401	1.77426
ENSG00000070159	PTPN3	protein_coding	68	96	0.0579233	0.126546
ENSG00000070182	SPTB	protein_coding	18	62	0.0140986	0.0751497
ENSG00000070190	DAPP1	protein_coding	0	0	0	0
ENSG00000070193	FGF10	protein_coding	0	0	0	0
ENSG00000070214	SLC44A1	protein_coding	147	104	0.0790677	0.086566
ENSG00000070269	TMEM260	protein_coding	38	26	0.0245078	0.0259493
ENSG00000070366	SMG6	protein_coding	140	226	0.0600579	0.150032
ENSG00000070367	EXOC5	protein_coding	305	293	0.465918	0.692643
ENSG00000070371	CLTCL1	protein_coding	191	289	0.178067	0.416946
ENSG00000070388	FGF22	protein_coding	0	0	0	0
ENSG00000070404	FSTL3	protein_coding	6	12	0.0892483	0.276225
ENSG00000070413	DGCR2	protein_coding	185	175	0.224654	0.328861
ENSG00000070423	RNF126	protein_coding	94	118	0.62446	1.21309
ENSG00000070444	MNT	protein_coding	42	74	0.257637	0.702463
ENSG00000070476	ZXDC	protein_coding	137	237	0.374127	1.00157
ENSG00000070495	JMJD6	protein_coding	232	143	1.73807	1.65786
ENSG00000070501	POLB	protein_coding	153	143	0.480002	0.694257
ENSG00000070526	ST6GALNAC1	protein_coding	0	0	0	0
ENSG00000070540	WIPI1	protein_coding	13	12	0.0372031	0.0531434
ENSG00000070601	FRMPD1	protein_coding	4	7	0.00436447	0.0118196
ENSG00000070610	GBA2	protein_coding	126	185	1.0665	2.42322
ENSG00000070614	NDST1	protein_coding	87	152	0.125756	0.340006
ENSG00000070669	ASNS	protein_coding	881	2523	4.51364	20.0032
ENSG00000070718	AP3M2	protein_coding	127	126	0.709619	1.08949
ENSG00000070729	CNGB1	protein_coding	1	0	0.00117872	0
ENSG00000070731	ST6GALNAC2	protein_coding	0	3	0	0.0225141
ENSG00000070748	CHAT	protein_coding	0	0	0	0
ENSG00000070756	PABPC1	protein_coding	2594	2436	7.33756	10.6633
ENSG00000070759	TESK2	protein_coding	14	18	0.00994684	0.0197907
ENSG00000070761	CFAP20	protein_coding	219	198	1.44468	2.02127
ENSG00000070770	CSNK2A2	protein_coding	784	590	2.0503	2.38773
ENSG00000070778	PTPN21	protein_coding	13	24	0.0152926	0.0436899
ENSG00000070785	EIF2B3	protein_coding	544	342	0.417957	0.406622
ENSG00000070808	CAMK2A	protein_coding	0	0	0	0
ENSG00000070814	TCOF1	protein_coding	681	689	1.67008	2.61482
ENSG00000070831	CDC42	protein_coding	351	373	0.91096	1.49807
ENSG00000070882	OSBPL3	protein_coding	114	111	0.0644497	0.0971116
ENSG00000070886	EPHA8	protein_coding	11	18	0.0287547	0.0728151
ENSG00000070915	SLC12A3	protein_coding	0	0	0	0
ENSG00000070950	RAD18	protein_coding	491	257	0.272758	0.220934
ENSG00000070961	ATP2B1	protein_coding	559	416	0.482432	0.555584
ENSG00000070985	TRPM5	protein_coding	0	0	0	0
ENSG00000071051	NCK2	protein_coding	55	38	0.0385291	0.0411948
ENSG00000071054	MAP4K4	protein_coding	392	408	0.207341	0.333958
ENSG00000071073	MGAT4A	protein_coding	45	44	0.0420364	0.063606
ENSG00000071082	RPL31	protein_coding	4564	3082	21.3995	22.3626
ENSG00000071127	WDR1	protein_coding	578	457	1.41945	1.73676
ENSG00000071189	SNX13	protein_coding	87	131	0.0607983	0.141669
ENSG00000071203	MS4A12	protein_coding	0	0	0	0
ENSG00000071205	ARHGAP10	protein_coding	72	110	0.0221131	0.0522809
ENSG00000071242	RPS6KA2	protein_coding	17	85	0.00357873	0.0276905
ENSG00000071243	ING3	protein_coding	126	94	0.498152	0.575111
ENSG00000071246	VASH1	protein_coding	11	31	0.0552686	0.241035
ENSG00000071282	LMCD1	protein_coding	14	11	0.0200777	0.0244125
ENSG00000071462	WBSCR22	protein_coding	487	381	2.30209	2.78709
ENSG00000071537	SEL1L	protein_coding	322	262	0.540742	0.680876
ENSG00000071539	TRIP13	protein_coding	491	390	1.92327	2.36404
ENSG00000071553	ATP6AP1	protein_coding	554	528	7.35226	10.8437
ENSG00000071564	TCF3	protein_coding	125	170	0.301977	0.635544
ENSG00000071575	TRIB2	protein_coding	19	26	0.076926	0.162902
ENSG00000071626	DAZAP1	protein_coding	1171	936	4.35783	5.3904
ENSG00000071655	MBD3	protein_coding	79	164	0.43043	1.38278
ENSG00000071677	PRLH	protein_coding	0	0	0	0
ENSG00000071794	HLTF	protein_coding	1079	1170	2.00097	3.35766
ENSG00000071859	FAM50A	protein_coding	386	439	6.18662	10.8884
ENSG00000071889	FAM3A	protein_coding	76	90	0.788667	1.44529
ENSG00000071894	CPSF1	protein_coding	255	367	1.65524	3.68654
ENSG00000071909	MYO3B	protein_coding	0	0	0	0
ENSG00000071967	CYBRD1	protein_coding	31	25	0.0903935	0.11281
ENSG00000071991	CDH19	protein_coding	0	0	0	0
ENSG00000071994	PDCD2	protein_coding	105	124	1.16914	2.13664
ENSG00000072041	SLC6A15	protein_coding	906	611	1.75154	1.82795
ENSG00000072042	RDH11	protein_coding	321	196	1.76662	1.66927
ENSG00000072062	PRKACA	protein_coding	359	361	1.42316	2.21461
ENSG00000072071	ADGRL1	protein_coding	102	233	0.182627	0.645585
ENSG00000072080	SPP2	protein_coding	0	0	0	0
ENSG00000072110	ACTN1	protein_coding	461	425	0.458135	0.653603
ENSG00000072121	ZFYVE26	protein_coding	104	159	0.121983	0.288599
ENSG00000072133	RPS6KA6	protein_coding	25	29	0.0201918	0.0362465
ENSG00000072134	EPN2	protein_coding	93	109	0.0803615	0.145755
ENSG00000072135	PTPN18	protein_coding	45	83	0.242693	0.692715
ENSG00000072163	LIMS2	protein_coding	1	4	0.00241081	0.014923
ENSG00000072182	ASIC4	protein_coding	1	0	0.00425329	0
ENSG00000072195	SPEG	protein_coding	5	34	0.00824719	0.0867855
ENSG00000072201	LNX1	protein_coding	0	1	0	0.00066887
ENSG00000072210	ALDH3A2	protein_coding	340	276	1.20758	1.51697
ENSG00000072274	TFRC	protein_coding	2372	1152	4.51242	3.39141
ENSG00000072310	SREBF1	protein_coding	112	187	0.440539	1.13826
ENSG00000072315	TRPC5	protein_coding	0	0	0	0
ENSG00000072364	AFF4	protein_coding	249	399	0.295235	0.732106
ENSG00000072401	UBE2D1	protein_coding	118	62	0.345117	0.280614
ENSG00000072415	MPP5	protein_coding	1173	560	1.29602	0.957487
ENSG00000072422	RHOBTB1	protein_coding	32	56	0.0253676	0.0686988
ENSG00000072501	SMC1A	protein_coding	2569	4795	5.53375	15.9837
ENSG00000072506	HSD17B10	protein_coding	1132	816	38.0156	42.407
ENSG00000072518	MARK2	protein_coding	191	210	0.277242	0.471713
ENSG00000072571	HMMR	protein_coding	426	502	1.40435	2.56095
ENSG00000072609	CHFR	protein_coding	42	97	0.0327699	0.11712
ENSG00000072657	TRHDE	protein_coding	4	1	0.000717361	0.00027753
ENSG00000072682	P4HA2	protein_coding	143	141	0.144611	0.220656
ENSG00000072694	FCGR2B	protein_coding	0	1	0	0.0104421
ENSG00000072736	NFATC3	protein_coding	135	99	0.0977579	0.110939
ENSG00000072756	TRNT1	protein_coding	129	120	0.563304	0.8109
ENSG00000072778	ACADVL	protein_coding	161	292	2.06745	5.80261
ENSG00000072786	STK10	protein_coding	83	104	0.0593615	0.115105
ENSG00000072803	FBXW11	protein_coding	341	271	0.245543	0.301977
ENSG00000072818	ACAP1	protein_coding	2	12	0.0139991	0.129983
ENSG00000072832	CRMP1	protein_coding	14	8	0.0101053	0.00893598
ENSG00000072840	EVC	protein_coding	17	33	0.017253	0.0518278
ENSG00000072849	DERL2	protein_coding	286	125	1.92327	1.30082
ENSG00000072858	SIDT1	protein_coding	2	18	0.00215132	0.0299627
ENSG00000072864	NDE1	protein_coding	0	0	0	0
ENSG00000072952	MRVI1	protein_coding	0	0	0	0
ENSG00000072954	TMEM38A	protein_coding	9	8	0.0325846	0.0448221
ENSG00000072958	AP1M1	protein_coding	258	225	0.558619	0.753895
ENSG00000073008	PVR	protein_coding	65	116	0.34377	0.949391
ENSG00000073050	XRCC1	protein_coding	57	99	0.159339	0.428267
ENSG00000073060	SCARB1	protein_coding	415	188	0.410414	0.287716
ENSG00000073067	CYP2W1	protein_coding	0	0	0	0
ENSG00000073111	MCM2	protein_coding	2613	2818	11.2924	18.846
ENSG00000073146	MOV10L1	protein_coding	0	0	0	0
ENSG00000073150	PANX2	protein_coding	7	16	0.0765899	0.27091
ENSG00000073169	SELENOO	protein_coding	46	54	0.289314	0.525579
ENSG00000073282	TP63	protein_coding	0	0	0	0
ENSG00000073331	ALPK1	protein_coding	25	39	0.0166511	0.0401976
ENSG00000073350	LLGL2	protein_coding	11	36	0.0229624	0.116294
ENSG00000073417	PDE8A	protein_coding	60	120	0.0395613	0.122443
ENSG00000073464	CLCN4	protein_coding	0	0	0	0
ENSG00000073536	NLE1	protein_coding	155	131	1.19588	1.56409
ENSG00000073578	SDHA	protein_coding	492	751	1.33865	3.1621
ENSG00000073584	SMARCE1	protein_coding	38	37	0.168873	0.254455
ENSG00000073598	FNDC8	protein_coding	0	1	0	0.0176903
ENSG00000073605	GSDMB	protein_coding	2	4	0.0137148	0.0424474
ENSG00000073614	KDM5A	protein_coding	557	1058	0.533144	1.56714
ENSG00000073670	ADAM11	protein_coding	21	31	0.0963147	0.220023
ENSG00000073711	PPP2R3A	protein_coding	62	46	0.035605	0.0408799
ENSG00000073712	FERMT2	protein_coding	465	575	0.511299	0.978413
ENSG00000073734	ABCB11	protein_coding	0	0	0	0
ENSG00000073737	DHRS9	protein_coding	0	0	0	0
ENSG00000073754	CD5L	protein_coding	0	0	0	0
ENSG00000073756	PTGS2	protein_coding	16	16	0.193852	0.299987
ENSG00000073792	IGF2BP2	protein_coding	114	145	0.0657926	0.129501
ENSG00000073803	MAP3K13	protein_coding	339	299	0.172074	0.234865
ENSG00000073849	ST6GAL1	protein_coding	25	31	0.0176681	0.0339034
ENSG00000073861	TBX21	protein_coding	0	0	0	0
ENSG00000073905	VDAC1P1	processed_pseudogene	121	70	14.9315	13.3674
ENSG00000073910	FRY	protein_coding	19	38	0.00742367	0.0229763
ENSG00000073921	PICALM	protein_coding	333	338	0.310576	0.487835
ENSG00000073969	NSF	protein_coding	0	0	0	0
ENSG00000074047	GLI2	protein_coding	19	27	0.00773537	0.0170107
ENSG00000074054	CLASP1	protein_coding	444	497	0.149006	0.258112
ENSG00000074071	MRPS34	protein_coding	474	345	39.1794	44.1297
ENSG00000074181	NOTCH3	protein_coding	115	247	0.286907	0.953613
ENSG00000074201	CLNS1A	protein_coding	1187	796	1.01092	1.04909
ENSG00000074211	PPP2R2C	protein_coding	6	14	0.00258355	0.0093288
ENSG00000074219	TEAD2	protein_coding	42	112	0.201026	0.829571
ENSG00000074266	EED	protein_coding	268	246	0.818339	1.16243
ENSG00000074276	CDHR2	protein_coding	3	10	0.00587182	0.0302889
ENSG00000074317	SNCB	protein_coding	22	27	0.219819	0.417482
ENSG00000074319	TSG101	protein_coding	330	438	0.586318	1.20428
ENSG00000074356	NCBP3	protein_coding	534	612	1.26749	2.24795
ENSG00000074370	ATP2A3	protein_coding	48	54	0.123732	0.21541
ENSG00000074410	CA12	protein_coding	10	14	0.0172157	0.0372979
ENSG00000074416	MGLL	protein_coding	1	5	0.000779823	0.0060339
ENSG00000074527	NTN4	protein_coding	14	13	0.0109865	0.0157873
ENSG00000074582	BCS1L	protein_coding	195	179	4.36015	6.19373
ENSG00000074590	NUAK1	protein_coding	25	41	0.0341108	0.08657
ENSG00000074603	DPP8	protein_coding	131	138	0.18219	0.297005
ENSG00000074621	SLC24A1	protein_coding	9	39	0.0189763	0.127252
ENSG00000074657	ZNF532	protein_coding	6	22	0.00506827	0.0287583
ENSG00000074660	SCARF1	protein_coding	0	0	0	0
ENSG00000074695	LMAN1	protein_coding	1149	844	3.74099	4.25247
ENSG00000074696	HACD3	protein_coding	4386	2628	9.57478	8.87805
ENSG00000074706	IPCEF1	protein_coding	1	4	0.000517277	0.00320196
ENSG00000074755	ZZEF1	protein_coding	237	321	0.178967	0.375113
ENSG00000074771	NOX3	protein_coding	0	0	0	0
ENSG00000074800	ENO1	protein_coding	20676	10974	118.567	97.3856
ENSG00000074803	SLC12A1	protein_coding	0	0	0	0
ENSG00000074842	MYDGF	protein_coding	213	141	0.768669	0.787429
ENSG00000074855	ANO8	protein_coding	24	88	0.216374	1.22774
ENSG00000074935	TUBE1	protein_coding	96	165	0.599641	1.59491
ENSG00000074964	ARHGEF10L	protein_coding	4	24	0.00264854	0.0245917
ENSG00000074966	TXK	protein_coding	0	1	0	0.00238619
ENSG00000075035	WSCD2	protein_coding	0	0	0	0
ENSG00000075043	KCNQ2	protein_coding	2	8	0.002888	0.0178768
ENSG00000075073	TACR2	protein_coding	0	0	0	0
ENSG00000075089	ACTR6	protein_coding	314	220	0.768718	0.833475
ENSG00000075131	TIPIN	protein_coding	1315	882	2.72267	2.82599
ENSG00000075142	SRI	protein_coding	475	334	2.27216	2.47243
ENSG00000075151	EIF4G3	protein_coding	618	938	0.174502	0.40987
ENSG00000075188	NUP37	protein_coding	781	597	1.73805	2.05598
ENSG00000075213	SEMA3A	protein_coding	26	52	0.00506704	0.0156825
ENSG00000075218	GTSE1	protein_coding	247	243	0.758643	1.15499
ENSG00000075223	SEMA3C	protein_coding	147	129	0.0855436	0.116169
ENSG00000075234	TTC38	protein_coding	117	62	0.470029	0.385445
ENSG00000075239	ACAT1	protein_coding	1372	877	5.46708	5.40796
ENSG00000075240	GRAMD4	protein_coding	32	67	0.0322666	0.104547
ENSG00000075275	CELSR1	protein_coding	73	189	0.0433204	0.173566
ENSG00000075290	WNT8B	protein_coding	0	2	0	0.015643
ENSG00000075292	ZNF638	protein_coding	612	825	0.404027	0.84284
ENSG00000075303	SLC25A40	protein_coding	107	103	0.26167	0.389798
ENSG00000075336	TIMM21	protein_coding	106	65	0.922814	0.875697
ENSG00000075340	ADD2	protein_coding	213	628	0.138779	0.633195
ENSG00000075388	FGF4	protein_coding	0	0	0	0
ENSG00000075391	RASAL2	protein_coding	105	136	0.0281728	0.0564692
ENSG00000075399	VPS9D1	protein_coding	3	13	0.0226616	0.151965
ENSG00000075407	ZNF37A	protein_coding	41	40	0.0766689	0.115752
ENSG00000075413	MARK3	protein_coding	244	314	0.215578	0.429315
ENSG00000075415	SLC25A3	protein_coding	1355	1072	11.087	13.5739
ENSG00000075420	FNDC3B	protein_coding	49	103	0.014163	0.0460711
ENSG00000075426	FOSL2	protein_coding	5	17	0.0210424	0.110715
ENSG00000075429	CACNG5	protein_coding	1	0	0.0020775	0
ENSG00000075461	CACNG4	protein_coding	1	3	0.00152789	0.00709326
ENSG00000075539	FRYL	protein_coding	141	133	0.0521439	0.0761147
ENSG00000075568	TMEM131	protein_coding	245	197	0.10702	0.133168
ENSG00000075618	FSCN1	protein_coding	191	190	1.44487	2.22424
ENSG00000075624	ACTB	protein_coding	4998	2356	14.2766	10.4144
ENSG00000075643	MOCOS	protein_coding	72	88	0.0890174	0.168367
ENSG00000075651	PLD1	protein_coding	36	101	0.0178924	0.0776818
ENSG00000075673	ATP12A	protein_coding	1	2	0.00326165	0.0100949
ENSG00000075702	WDR62	protein_coding	137	263	0.285433	0.847954
ENSG00000075711	DLG1	protein_coding	234	234	0.0953748	0.147593
ENSG00000075785	RAB7A	protein_coding	1172	959	1.38305	1.75131
ENSG00000075790	BCAP29	protein_coding	488	303	1.03806	0.997414
ENSG00000075826	SEC31B	protein_coding	9	40	0.0283476	0.194969
ENSG00000075856	SART3	protein_coding	425	349	1.14561	1.45581
ENSG00000075884	ARHGAP15	protein_coding	1	0	0.000154572	0
ENSG00000075886	TUBA3D	protein_coding	1	0	0.0152943	0
ENSG00000075891	PAX2	protein_coding	4	9	0.00443692	0.0154489
ENSG00000075914	EXOSC7	protein_coding	203	198	0.349236	0.527134
ENSG00000075945	KIFAP3	protein_coding	444	419	0.283506	0.414024
ENSG00000075975	MKRN2	protein_coding	319	306	1.25024	1.8559
ENSG00000076003	MCM6	protein_coding	2414	1651	6.86421	7.26495
ENSG00000076043	REXO2	protein_coding	117	140	1.12386	2.08107
ENSG00000076053	RBM7	protein_coding	61	28	0.45035	0.319897
ENSG00000076067	RBMS2	protein_coding	23	39	0.032407	0.085037
ENSG00000076108	BAZ2A	protein_coding	461	560	1.17029	2.19996
ENSG00000076201	PTPN23	protein_coding	150	174	0.483998	0.868829
ENSG00000076242	MLH1	protein_coding	0	1	0	0.00281203
ENSG00000076248	UNG	protein_coding	419	422	3.26743	5.09258
ENSG00000076258	FMO4	protein_coding	9	9	0.0337839	0.0522807
ENSG00000076321	KLHL20	protein_coding	55	74	0.0802012	0.166987
ENSG00000076344	RGS11	protein_coding	0	0	0	0
ENSG00000076351	SLC46A1	protein_coding	12	7	0.100926	0.0911073
ENSG00000076356	PLXNA2	protein_coding	25	39	0.01178	0.0284382
ENSG00000076382	SPAG5	protein_coding	307	345	1.47942	2.57279
ENSG00000076513	ANKRD13A	protein_coding	136	166	0.35072	0.662465
ENSG00000076554	TPD52	protein_coding	25	22	0.0133143	0.0181314
ENSG00000076555	ACACB	protein_coding	30	96	0.0207035	0.102524
ENSG00000076604	TRAF4	protein_coding	36	44	0.540096	1.02154
ENSG00000076641	PAG1	protein_coding	93	78	0.067461	0.0875582
ENSG00000076650	GPATCH1	protein_coding	79	54	0.166459	0.176078
ENSG00000076662	ICAM3	protein_coding	0	0	0	0
ENSG00000076685	NT5C2	protein_coding	213	177	0.211692	0.272227
ENSG00000076706	MCAM	protein_coding	127	73	1.02284	0.909827
ENSG00000076716	GPC4	protein_coding	453	447	0.410819	0.627324
ENSG00000076770	MBNL3	protein_coding	66	52	0.057243	0.0697933
ENSG00000076826	CAMSAP3	protein_coding	38	57	0.177497	0.412016
ENSG00000076864	RAP1GAP	protein_coding	27	38	0.038625	0.0841241
ENSG00000076924	XAB2	protein_coding	153	191	1.59451	3.08036
ENSG00000076928	ARHGEF1	protein_coding	65	120	0.144751	0.413543
ENSG00000076944	STXBP2	protein_coding	40	57	0.380765	0.839661
ENSG00000076984	MAP2K7	protein_coding	172	188	1.69224	2.86236
ENSG00000077009	NMRK2	protein_coding	0	2	0	0.0347727
ENSG00000077044	DGKD	protein_coding	75	147	0.0667381	0.202424
ENSG00000077063	CTTNBP2	protein_coding	49	73	0.0313632	0.0723069
ENSG00000077080	ACTL6B	protein_coding	0	4	0	0.0484659
ENSG00000077092	RARB	protein_coding	51	43	0.0125987	0.0164383
ENSG00000077097	TOP2B	protein_coding	1823	2241	2.84576	5.41359
ENSG00000077147	TM9SF3	protein_coding	1279	1072	1.93008	2.5034
ENSG00000077150	NFKB2	protein_coding	71	121	0.882387	2.32712
ENSG00000077152	UBE2T	protein_coding	1095	717	11.0989	11.2465
ENSG00000077157	PPP1R12B	protein_coding	28	43	0.0120079	0.0285371
ENSG00000077232	DNAJC10	protein_coding	549	425	0.732548	0.877577
ENSG00000077235	GTF3C1	protein_coding	732	1006	0.84772	1.8029
ENSG00000077238	IL4R	protein_coding	12	17	0.0245686	0.0538617
ENSG00000077254	USP33	protein_coding	859	935	1.40746	2.37076
ENSG00000077264	PAK3	protein_coding	4	6	0.00147866	0.00343235
ENSG00000077274	CAPN6	protein_coding	0	3	0	0.0191106
ENSG00000077279	DCX	protein_coding	0	2	0	0.00272963
ENSG00000077312	SNRPA	protein_coding	370	394	2.62443	4.32475
ENSG00000077327	SPAG6	protein_coding	1	0	0.000961975	0
ENSG00000077348	EXOSC5	protein_coding	123	75	1.15894	1.09358
ENSG00000077380	DYNC1I2	protein_coding	219	173	0.375614	0.459173
ENSG00000077420	APBB1IP	protein_coding	0	1	0	0.0012495
ENSG00000077454	LRCH4	protein_coding	12	22	0.103411	0.293388
ENSG00000077458	FAM76B	protein_coding	86	84	0.419198	0.633626
ENSG00000077463	SIRT6	protein_coding	46	46	0.566573	0.876776
ENSG00000077498	TYR	protein_coding	0	0	0	0
ENSG00000077514	POLD3	protein_coding	358	491	0.213745	0.453656
ENSG00000077522	ACTN2	protein_coding	8	22	0.0107082	0.0455704
ENSG00000077549	CAPZB	protein_coding	917	758	0.653827	0.836363
ENSG00000077585	GPR137B	protein_coding	9	12	0.0118672	0.0244861
ENSG00000077616	NAALAD2	protein_coding	3	16	0.00511455	0.0422122
ENSG00000077684	JADE1	protein_coding	104	108	0.165893	0.266595
ENSG00000077713	SLC25A43	protein_coding	4	5	0.00755291	0.0146102
ENSG00000077721	UBE2A	protein_coding	847	501	5.33388	4.88237
ENSG00000077782	FGFR1	protein_coding	133	166	0.241219	0.465908
ENSG00000077800	FKBP6	protein_coding	0	0	0	0
ENSG00000077935	SMC1B	protein_coding	1	1	0.00150443	0.00232811
ENSG00000077942	FBLN1	protein_coding	128	146	0.135436	0.239062
ENSG00000077943	ITGA8	protein_coding	57	87	0.0289299	0.068332
ENSG00000077984	CST7	protein_coding	0	1	0	0.0151357
ENSG00000078018	MAP2	protein_coding	4	10	0.00134997	0.00522274
ENSG00000078043	PIAS2	protein_coding	108	74	0.0966462	0.102477
ENSG00000078053	AMPH	protein_coding	82	66	0.0346189	0.0431197
ENSG00000078061	ARAF	protein_coding	85	114	0.821986	1.70601
ENSG00000078070	MCCC1	protein_coding	164	127	0.170156	0.20391
ENSG00000078081	LAMP3	protein_coding	10	1	0.0251384	0.00389018
ENSG00000078098	FAP	protein_coding	0	0	0	0
ENSG00000078114	NEBL	protein_coding	25	45	0.0066362	0.0184852
ENSG00000078124	ACER3	protein_coding	49	48	0.0309016	0.0468445
ENSG00000078140	UBE2K	protein_coding	469	352	0.579097	0.672594
ENSG00000078142	PIK3C3	protein_coding	194	292	0.15307	0.356535
ENSG00000078177	N4BP2	protein_coding	169	174	0.17436	0.277806
ENSG00000078237	TIGAR	protein_coding	413	257	0.922846	0.888679
ENSG00000078246	TULP3	protein_coding	285	262	0.466589	0.663779
ENSG00000078269	SYNJ2	protein_coding	66	62	0.0588838	0.0856004
ENSG00000078295	ADCY2	protein_coding	0	0	0	0
ENSG00000078304	PPP2R5C	protein_coding	209	273	0.131598	0.26601
ENSG00000078319	PMS2P1	unprocessed_pseudogene	8	18	0.0400224	0.139354
ENSG00000078328	RBFOX1	protein_coding	0	0	0	0
ENSG00000078369	GNB1	protein_coding	966	1048	0.955144	1.60356
ENSG00000078399	HOXA9	protein_coding	42	43	0.344817	0.546311
ENSG00000078401	EDN1	protein_coding	0	1	0	0.0237027
ENSG00000078403	MLLT10	protein_coding	137	182	0.0654752	0.134605
ENSG00000078487	ZCWPW1	protein_coding	1	10	0.00371511	0.0574916
ENSG00000078549	ADCYAP1R1	protein_coding	29	15	0.0514184	0.0411571
ENSG00000078579	FGF20	protein_coding	0	0	0	0
ENSG00000078589	P2RY10	protein_coding	0	0	0	0
ENSG00000078596	ITM2A	protein_coding	0	2	0	0.0444637
ENSG00000078618	NRDC	protein_coding	1034	919	1.20563	1.65821
ENSG00000078668	VDAC3	protein_coding	1613	1014	11.825	11.5037
ENSG00000078674	PCM1	protein_coding	1070	1017	1.04541	1.53765
ENSG00000078687	TNRC6C	protein_coding	54	85	0.0377734	0.0920119
ENSG00000078699	CBFA2T2	protein_coding	78	159	0.0510259	0.160963
ENSG00000078725	BRINP1	protein_coding	0	0	0	0
ENSG00000078747	ITCH.1	protein_coding	53	51	0.0374335	0.0557426
ENSG00000078795	PKD2L2	protein_coding	1	3	0.00191025	0.00886838
ENSG00000078804	TP53INP2	protein_coding	13	29	0.148674	0.513242
ENSG00000078808	SDF4	protein_coding	252	242	1.7436	2.59116
ENSG00000078814	MYH7B	protein_coding	0	3	0	0.0179697
ENSG00000078898	BPIFB2	protein_coding	0	0	0	0
ENSG00000078900	TP73	protein_coding	15	27	0.0187574	0.0522489
ENSG00000078902	TOLLIP	protein_coding	74	51	0.219466	0.234066
ENSG00000078967	UBE2D4	protein_coding	16	13	0.0563756	0.0708838
ENSG00000079101	CLUL1	protein_coding	2	5	0.00392313	0.0151777
ENSG00000079102	RUNX1T1	protein_coding	51	81	0.0359818	0.0884363
ENSG00000079112	CDH17	protein_coding	0	0	0	0
ENSG00000079134	THOC1	protein_coding	284	177	0.55517	0.535443
ENSG00000079150	FKBP7	protein_coding	222	235	1.55526	2.54771
ENSG00000079156	OSBPL6	protein_coding	129	152	0.0647712	0.118105
ENSG00000079215	SLC1A3	protein_coding	309	101	0.394424	0.199507
ENSG00000079246	XRCC5	protein_coding	6555	6028	6.93989	9.8761
ENSG00000079257	LXN	protein_coding	10	18	0.0389415	0.108472
ENSG00000079263	SP140	protein_coding	0	0	0	0
ENSG00000079277	MKNK1	protein_coding	139	123	0.244725	0.33512
ENSG00000079308	TNS1	protein_coding	8	9	0.00411969	0.00717214
ENSG00000079313	REXO1	protein_coding	43	81	0.135459	0.394872
ENSG00000079332	SAR1A	protein_coding	1029	596	4.63431	4.15383
ENSG00000079335	CDC14A	protein_coding	26	32	0.0155246	0.0295685
ENSG00000079337	RAPGEF3	protein_coding	2	16	0.00570669	0.0706491
ENSG00000079385	CEACAM1	protein_coding	0	2	0	0.00600533
ENSG00000079387	SENP1	protein_coding	172	117	0.283842	0.29879
ENSG00000079393	DUSP13	protein_coding	0	0	0	0
ENSG00000079432	CIC	protein_coding	55	102	0.211122	0.605904
ENSG00000079435	LIPE	protein_coding	9	21	0.0363346	0.131199
ENSG00000079459	FDFT1	protein_coding	1047	518	2.50502	1.9179
ENSG00000079462	PAFAH1B3	protein_coding	67	71	1.07632	1.76504
ENSG00000079482	OPHN1	protein_coding	54	93	0.014431	0.0384608
ENSG00000079557	AFM	protein_coding	0	0	0	0
ENSG00000079616	KIF22	protein_coding	335	429	2.3901	4.73654
ENSG00000079689	SCGN	protein_coding	0	0	0	0
ENSG00000079691	CARMIL1	protein_coding	109	132	0.0334048	0.062602
ENSG00000079739	PGM1	protein_coding	681	638	1.06409	1.54271
ENSG00000079785	DDX1	protein_coding	2961	1921	7.75905	7.78986
ENSG00000079805	DNM2	protein_coding	327	467	0.296495	0.655267
ENSG00000079819	EPB41L2	protein_coding	821	833	0.383579	0.602266
ENSG00000079841	RIMS1	protein_coding	1	5	0.000202625	0.00156781
ENSG00000079931	MOXD1	protein_coding	86	72	0.0853092	0.110525
ENSG00000079950	STX7	protein_coding	176	151	0.273529	0.363162
ENSG00000079974	RABL2B	protein_coding	12	8	0.0776912	0.0801518
ENSG00000079999	KEAP1	protein_coding	149	155	0.884798	1.42437
ENSG00000080007	DDX43	protein_coding	0	0	0	0
ENSG00000080031	PTPRH	protein_coding	2	2	0.00740604	0.0114609
ENSG00000080166	DCT	protein_coding	0	0	0	0
ENSG00000080189	SLC35C2	protein_coding	91	86	0.515319	0.753642
ENSG00000080200	CRYBG3	protein_coding	176	208	0.149827	0.274013
ENSG00000080224	EPHA6	protein_coding	21	36	0.00234307	0.00621585
ENSG00000080293	SCTR	protein_coding	0	0	0	0
ENSG00000080298	RFX3	protein_coding	25	36	0.00850186	0.0189456
ENSG00000080345	RIF1	protein_coding	1467	1398	1.56436	2.30699
ENSG00000080371	RAB21	protein_coding	338	240	0.778859	0.855827
ENSG00000080493	SLC4A4	protein_coding	27	34	0.00733234	0.0142886
ENSG00000080503	SMARCA2	protein_coding	171	239	0.0838778	0.181418
ENSG00000080511	RDH8	protein_coding	0	0	0	0
ENSG00000080546	SESN1	protein_coding	83	109	0.0801364	0.162859
ENSG00000080561	MID2	protein_coding	88	120	0.0907801	0.191567
ENSG00000080572	PIH1D3	protein_coding	0	0	0	0
ENSG00000080573	COL5A3	protein_coding	0	0	0	0
ENSG00000080603	SRCAP	protein_coding	46	31	0.111424	0.116202
ENSG00000080608	PUM3	protein_coding	379	338	0.320425	0.442218
ENSG00000080618	CPB2	protein_coding	0	0	0	0
ENSG00000080644	CHRNA3	protein_coding	19	28	0.0703947	0.160538
ENSG00000080709	KCNN2	protein_coding	2	1	0.00154392	0.00119461
ENSG00000080802	CNOT4	protein_coding	188	133	0.132627	0.145197
ENSG00000080815	PSEN1	protein_coding	151	156	0.181053	0.289458
ENSG00000080819	CPOX	protein_coding	518	532	0.746713	1.18677
ENSG00000080822	CLDND1	protein_coding	92	90	0.382716	0.57938
ENSG00000080823	MOK	protein_coding	30	85	0.0389005	0.170563
ENSG00000080824	HSP90AA1	protein_coding	30175	13418	53.5535	36.852
ENSG00000080839	RBL1	protein_coding	470	488	0.493567	0.79305
ENSG00000080845	DLGAP4	protein_coding	58	56	0.0273022	0.0407934
ENSG00000080854	IGSF9B	protein_coding	1	42	0.00216108	0.14046
ENSG00000080910	CFHR2	protein_coding	0	0	0	0
ENSG00000080947	CROCCP3	transcribed_unprocessed_pseudogene	1	28	0.00328841	0.142487
ENSG00000080986	NDC80	protein_coding	413	403	0.957736	1.44622
ENSG00000081014	AP4E1	protein_coding	73	69	0.0785669	0.114921
ENSG00000081019	RSBN1	protein_coding	139	150	0.287204	0.479623
ENSG00000081026	MAGI3	protein_coding	152	212	0.0538861	0.116306
ENSG00000081041	CXCL2	protein_coding	0	1	0	0.0716851
ENSG00000081051	AFP	protein_coding	1	0	0.00417956	0
ENSG00000081052	COL4A4	protein_coding	7	23	0.00453836	0.023076
ENSG00000081059	TCF7	protein_coding	6	15	0.0168984	0.0653761
ENSG00000081087	OSTM1	protein_coding	57	37	0.0479299	0.0481466
ENSG00000081138	CDH7	protein_coding	1	0	0.000746974	0
ENSG00000081148	IMPG2	protein_coding	0	1	0	0.00165216
ENSG00000081154	PCNP	protein_coding	284	234	1.46089	1.86271
ENSG00000081177	EXD2	protein_coding	100	132	0.199283	0.407077
ENSG00000081181	ARG2	protein_coding	152	99	0.498256	0.5022
ENSG00000081189	MEF2C	protein_coding	89	67	0.0497661	0.0579764
ENSG00000081237	PTPRC	protein_coding	0	0	0	0
ENSG00000081248	CACNA1S	protein_coding	0	0	0	0
ENSG00000081277	PKP1	protein_coding	0	0	0	0
ENSG00000081307	UBA5	protein_coding	574	357	2.53955	2.44425
ENSG00000081320	STK17B	protein_coding	106	80	0.258331	0.301713
ENSG00000081377	CDC14B	protein_coding	32	52	0.0258399	0.0649796
ENSG00000081386	ZNF510	protein_coding	16	23	0.0751987	0.167282
ENSG00000081479	LRP2	protein_coding	375	380	0.166576	0.261214
ENSG00000081665	ZNF506	protein_coding	1	11	0.00291381	0.0496005
ENSG00000081692	JMJD4	protein_coding	45	43	0.944248	1.39629
ENSG00000081721	DUSP12	protein_coding	48	71	0.67142	1.53689
ENSG00000081760	AACS	protein_coding	92	99	0.123497	0.205654
ENSG00000081791	KIAA0141	protein_coding	80	81	0.458963	0.719127
ENSG00000081800	SLC13A1	protein_coding	0	0	0	0
ENSG00000081803	CADPS2	protein_coding	99	128	0.0182282	0.0364713
ENSG00000081818	PCDHB4	protein_coding	0	0	0	0
ENSG00000081842	PCDHA6	protein_coding	0	0	0	0
ENSG00000081853	PCDHGA2	protein_coding	0	0	0	0
ENSG00000081870	HSPB11	protein_coding	501	271	1.78589	1.49492
ENSG00000081913	PHLPP1	protein_coding	64	81	0.025274	0.0495006
ENSG00000081923	ATP8B1	protein_coding	2	12	0.0013358	0.0124029
ENSG00000081985	IL12RB2	protein_coding	3	3	0.00350616	0.0054258
ENSG00000082014	SMARCD3	protein_coding	36	77	0.0962658	0.318634
ENSG00000082068	WDR70	protein_coding	259	206	0.0724237	0.0891417
ENSG00000082074	FYB	protein_coding	0	0	0	0
ENSG00000082126	MPP4	protein_coding	0	1	0	0.00300858
ENSG00000082146	STRADB	protein_coding	29	40	0.0326347	0.0696584
ENSG00000082153	BZW1	protein_coding	767	461	4.79317	4.45821
ENSG00000082175	PGR	protein_coding	0	0	0	0
ENSG00000082196	C1QTNF3	protein_coding	0	1	0	0.00664083
ENSG00000082212	ME2	protein_coding	420	310	0.584376	0.667478
ENSG00000082213	C5orf22	protein_coding	153	117	0.70243	0.831246
ENSG00000082258	CCNT2	protein_coding	80	125	0.203646	0.492412
ENSG00000082269	FAM135A	protein_coding	111	112	0.0783588	0.122353
ENSG00000082293	COL19A1	protein_coding	6	9	0.00182834	0.00424404
ENSG00000082397	EPB41L3	protein_coding	470	247	0.206372	0.167835
ENSG00000082438	COBLL1	protein_coding	84	73	0.0462499	0.0621994
ENSG00000082458	DLG3	protein_coding	100	147	0.172594	0.392622
ENSG00000082482	KCNK2	protein_coding	1	0	0.000452378	0
ENSG00000082497	SERTAD4	protein_coding	0	0	0	0
ENSG00000082512	TRAF5	protein_coding	38	51	0.0822738	0.170876
ENSG00000082515	MRPL22	protein_coding	436	246	1.60979	1.40556
ENSG00000082516	GEMIN5	protein_coding	537	305	1.1063	0.972372
ENSG00000082556	OPRK1	protein_coding	0	0	0	0
ENSG00000082641	NFE2L1	protein_coding	421	392	3.3479	4.82401
ENSG00000082684	SEMA5B	protein_coding	0	3	0	0.00406832
ENSG00000082701	GSK3B	protein_coding	152	162	0.0582429	0.0960609
ENSG00000082781	ITGB5	protein_coding	39	53	0.0292613	0.0615371
ENSG00000082805	ERC1	protein_coding	172	159	0.035611	0.0509431
ENSG00000082898	XPO1	protein_coding	4047	2632	6.96786	7.01269
ENSG00000082929	LINC01587	processed_transcript	0	0	0	0
ENSG00000082996	RNF13	protein_coding	111	122	0.0777306	0.132209
ENSG00000083067	TRPM3	protein_coding	0	1	0	0.000176432
ENSG00000083093	PALB2	protein_coding	92	115	0.252345	0.488132
ENSG00000083097	DOPEY1	protein_coding	157	208	0.158452	0.324857
ENSG00000083099	LYRM2	protein_coding	253	157	0.374945	0.360063
ENSG00000083123	BCKDHB	protein_coding	93	92	0.040613	0.0621731
ENSG00000083168	KAT6A	protein_coding	181	227	0.154601	0.300049
ENSG00000083223	ZCCHC6	protein_coding	308	279	0.483053	0.677143
ENSG00000083290	ULK2	protein_coding	13	55	0.0140088	0.0917176
ENSG00000083307	GRHL2	protein_coding	0	0	0	0
ENSG00000083312	TNPO1	protein_coding	1960	1383	2.0424	2.23017
ENSG00000083444	PLOD1	protein_coding	205	189	0.51899	0.740456
ENSG00000083454	P2RX5	protein_coding	0	0	0	0
ENSG00000083457	ITGAE	protein_coding	157	108	0.189677	0.201916
ENSG00000083520	DIS3	protein_coding	1780	1490	6.22379	8.0622
ENSG00000083535	PIBF1	protein_coding	419	411	0.187053	0.283938
ENSG00000083544	TDRD3	protein_coding	115	101	0.0678271	0.0921847
ENSG00000083622	AC000111.6	antisense	0	0	0	0
ENSG00000083635	NUFIP1	protein_coding	67	57	0.139567	0.183744
ENSG00000083642	PDS5B	protein_coding	417	416	0.227756	0.351608
ENSG00000083720	OXCT1	protein_coding	332	389	0.247351	0.448495
ENSG00000083750	RRAGB	protein_coding	39	39	0.0994517	0.153902
ENSG00000083782	EPYC	protein_coding	0	0	0	0
ENSG00000083799	CYLD	protein_coding	101	146	0.176485	0.394796
ENSG00000083807	SLC27A5	protein_coding	35	30	0.111316	0.147654
ENSG00000083812	ZNF324	protein_coding	15	29	0.187042	0.5596
ENSG00000083814	ZNF671	protein_coding	3	2	0.0398693	0.041132
ENSG00000083817	ZNF416	protein_coding	12	14	0.170568	0.307948
ENSG00000083828	ZNF586	protein_coding	20	25	0.0416202	0.0805094
ENSG00000083838	ZNF446	protein_coding	5	10	0.0725282	0.224476
ENSG00000083844	ZNF264	protein_coding	29	35	0.0968088	0.180808
ENSG00000083845	RPS5	protein_coding	2602	1700	32.3876	32.7456
ENSG00000083857	FAT1	protein_coding	658	515	0.495577	0.60024
ENSG00000083896	YTHDC1	protein_coding	19	5	0.0500776	0.0203935
ENSG00000083937	CHMP2B	protein_coding	652	493	2.41275	2.82321
ENSG00000084070	SMAP2	protein_coding	202	282	0.269353	0.581905
ENSG00000084072	PPIE	protein_coding	273	247	0.398251	0.5576
ENSG00000084073	ZMPSTE24	protein_coding	879	475	2.54952	2.13204
ENSG00000084090	STARD7	protein_coding	373	322	1.62858	2.17564
ENSG00000084092	NOA1	protein_coding	158	170	1.06987	1.78137
ENSG00000084093	REST	protein_coding	186	159	0.695903	0.920588
ENSG00000084110	HAL	protein_coding	3	2	0.0132438	0.0136632
ENSG00000084112	SSH1	protein_coding	37	98	0.048764	0.199874
ENSG00000084207	GSTP1	protein_coding	816	672	27.8504	35.493
ENSG00000084234	APLP2	protein_coding	3585	2896	5.00363	6.255
ENSG00000084444	FAM234B	protein_coding	505	458	0.537929	0.754973
ENSG00000084453	SLCO1A2	protein_coding	0	0	0	0
ENSG00000084463	WBP11	protein_coding	360	472	1.98669	4.03091
ENSG00000084623	EIF3I	protein_coding	2714	1805	29.3482	30.2052
ENSG00000084628	NKAIN1	protein_coding	3	10	0.0052488	0.0270752
ENSG00000084636	COL16A1	protein_coding	0	1	0	0.0031098
ENSG00000084652	TXLNA	protein_coding	560	553	3.15056	4.81457
ENSG00000084674	APOB	protein_coding	0	0	0	0
ENSG00000084676	NCOA1	protein_coding	73	97	0.0274006	0.0563432
ENSG00000084693	AGBL5	protein_coding	186	263	0.688762	1.50711
ENSG00000084710	EFR3B	protein_coding	35	32	0.0313015	0.0442873
ENSG00000084731	KIF3C	protein_coding	47	62	0.087585	0.178795
ENSG00000084733	RAB10	protein_coding	465	324	0.47083	0.507678
ENSG00000084734	GCKR	protein_coding	0	0	0	0
ENSG00000084754	HADHA	protein_coding	728	602	1.40835	1.80222
ENSG00000084764	MAPRE3	protein_coding	70	90	0.129452	0.257565
ENSG00000084774	CAD	protein_coding	891	942	3.51124	5.74468
ENSG00000085063	CD59	protein_coding	445	328	1.2195	1.391
ENSG00000085117	CD82	protein_coding	13	12	0.0243196	0.0347398
ENSG00000085185	BCORL1	protein_coding	225	281	0.305868	0.59114
ENSG00000085224	ATRX	protein_coding	555	561	0.206393	0.322847
ENSG00000085231	AK6	protein_coding	0	0	0	0
ENSG00000085265	FCN1	protein_coding	0	0	0	0
ENSG00000085274	MYNN	protein_coding	75	75	0.46478	0.71925
ENSG00000085276	MECOM	protein_coding	180	152	0.0324689	0.0424298
ENSG00000085365	SCAMP1	protein_coding	207	198	0.182812	0.270603
ENSG00000085377	PREP	protein_coding	682	420	0.56857	0.541853
ENSG00000085382	HACE1	protein_coding	392	511	0.311168	0.627714
ENSG00000085415	SEH1L	protein_coding	606	372	1.5695	1.49095
ENSG00000085433	WDR47	protein_coding	118	104	0.171738	0.234234
ENSG00000085449	WDFY1	protein_coding	210	239	0.245062	0.431605
ENSG00000085465	OVGP1	protein_coding	2	10	0.0155442	0.120274
ENSG00000085491	SLC25A24	protein_coding	571	431	0.894296	1.04461
ENSG00000085511	MAP3K4	protein_coding	170	182	0.141569	0.234543
ENSG00000085514	PILRA	protein_coding	0	0	0	0
ENSG00000085552	IGSF9	protein_coding	7	7	0.0394541	0.0610555
ENSG00000085563	ABCB1	protein_coding	79	77	0.0394239	0.0594643
ENSG00000085644	ZNF213	protein_coding	13	34	0.104411	0.422584
ENSG00000085662	AKR1B1	protein_coding	765	1007	4.72704	9.62918
ENSG00000085719	CPNE3	protein_coding	843	585	1.87404	2.01251
ENSG00000085721	RRN3	protein_coding	200	66	0.610238	0.311635
ENSG00000085733	CTTN	protein_coding	604	594	1.6554	2.51933
ENSG00000085741	WNT11	protein_coding	11	24	0.0471522	0.159204
ENSG00000085760	MTIF2	protein_coding	352	340	1.12462	1.68102
ENSG00000085788	DDHD2	protein_coding	127	198	0.263994	0.636925
ENSG00000085831	TTC39A	protein_coding	15	34	0.027129	0.0951597
ENSG00000085832	EPS15	protein_coding	324	394	0.2054	0.386531
ENSG00000085840	ORC1	protein_coding	275	280	0.909772	1.43348
ENSG00000085871	MGST2	protein_coding	149	101	0.207953	0.218139
ENSG00000085872	CHERP	protein_coding	221	161	0.938489	1.05802
ENSG00000085978	ATG16L1	protein_coding	0	0	0	0
ENSG00000085982	USP40	protein_coding	59	156	0.0676504	0.276806
ENSG00000085998	POMGNT1	protein_coding	56	74	0.185304	0.378931
ENSG00000085999	RAD54L	protein_coding	102	205	0.346705	1.07832
ENSG00000086015	MAST2	protein_coding	44	87	0.018481	0.0565489
ENSG00000086061	DNAJA1	protein_coding	2736	1026	19.4805	11.3048
ENSG00000086062	B4GALT1	protein_coding	238	236	0.393602	0.603983
ENSG00000086065	CHMP5	protein_coding	384	377	2.33745	3.55128
ENSG00000086102	NFX1	protein_coding	333	304	0.432085	0.610423
ENSG00000086159	AQP6	protein_coding	0	0	0	0
ENSG00000086189	DIMT1	protein_coding	416	316	2.60888	3.06676
ENSG00000086200	IPO11	protein_coding	1133	994	0.527851	0.716639
ENSG00000086205	FOLH1	protein_coding	0	0	0	0
ENSG00000086232	EIF2AK1	protein_coding	370	565	1.0468	2.47369
ENSG00000086288	NME8	protein_coding	0	0	0	0
ENSG00000086289	EPDR1	protein_coding	7	9	0.00273222	0.00543616
ENSG00000086300	SNX10	protein_coding	89	133	0.112977	0.261267
ENSG00000086475	SEPHS1	protein_coding	105	112	0.355873	0.58743
ENSG00000086504	MRPL28	protein_coding	504	348	16.7749	17.9243
ENSG00000086506	HBQ1	protein_coding	14	21	2.00962	4.66484
ENSG00000086544	ITPKC	protein_coding	36	41	0.158564	0.27946
ENSG00000086548	CEACAM6	protein_coding	0	0	0	0
ENSG00000086570	FAT2	protein_coding	0	1	0	0.00249702
ENSG00000086589	RBM22	protein_coding	401	309	4.06846	4.85151
ENSG00000086598	TMED2	protein_coding	606	358	4.51442	4.1271
ENSG00000086619	ERO1B	protein_coding	82	103	0.129168	0.25108
ENSG00000086666	ZFAND6	protein_coding	376	285	0.49915	0.585491
ENSG00000086696	HSD17B2	protein_coding	0	0	0	0
ENSG00000086712	TXLNG	protein_coding	409	410	0.736737	1.14289
ENSG00000086717	PPEF1	protein_coding	0	2	0	0.00213056
ENSG00000086730	LAT2	protein_coding	1	1	0.00346697	0.00536516
ENSG00000086758	HUWE1	protein_coding	2157	2549	1.45968	2.66938
ENSG00000086827	ZW10	protein_coding	466	359	1.20034	1.43102
ENSG00000086848	ALG9	protein_coding	6	12	0.00702408	0.0217396
ENSG00000086967	MYBPC2	protein_coding	0	0	0	0
ENSG00000086991	NOX4	protein_coding	0	0	0	0
ENSG00000087008	ACOX3	protein_coding	57	79	0.0801253	0.171852
ENSG00000087053	MTMR2	protein_coding	206	200	0.233211	0.350383
ENSG00000087074	PPP1R15A	protein_coding	22	52	0.627976	2.29697
ENSG00000087076	HSD17B14	protein_coding	11	17	0.0486468	0.116344
ENSG00000087077	TRIP6	protein_coding	133	161	2.2032	4.12724
ENSG00000087085	ACHE	protein_coding	10	19	0.149898	0.440739
ENSG00000087086	FTL	protein_coding	312	322	20.69	33.0441
ENSG00000087087	SRRT	protein_coding	894	624	6.90213	7.45525
ENSG00000087088	BAX	protein_coding	392	276	5.87347	6.39956
ENSG00000087095	NLK	protein_coding	23	35	0.0155634	0.0366503
ENSG00000087111	PIGS	protein_coding	265	334	1.49976	2.92519
ENSG00000087116	ADAMTS2	protein_coding	12	36	0.00535307	0.0248517
ENSG00000087128	TMPRSS11E	protein_coding	0	0	0	0
ENSG00000087152	ATXN7L3	protein_coding	60	112	0.755641	2.1828
ENSG00000087157	PGS1	protein_coding	52	71	0.117084	0.247391
ENSG00000087191	PSMC5	protein_coding	1772	1222	38.0366	40.5921
ENSG00000087206	UIMC1	protein_coding	264	337	0.234856	0.463939
ENSG00000087237	CETP	protein_coding	0	0	0	0
ENSG00000087245	MMP2	protein_coding	16	26	0.0143112	0.0359884
ENSG00000087250	MT3	protein_coding	0	0	0	0
ENSG00000087253	LPCAT2	protein_coding	99	57	0.133376	0.118837
ENSG00000087258	GNAO1	protein_coding	8	30	0.0050414	0.029256
ENSG00000087263	OGFOD1	protein_coding	524	277	1.98592	1.62459
ENSG00000087266	SH3BP2	protein_coding	17	59	0.0370027	0.198732
ENSG00000087269	NOP14	protein_coding	736	694	3.02588	4.41536
ENSG00000087274	ADD1	protein_coding	454	494	0.551011	0.927821
ENSG00000087299	L2HGDH	protein_coding	116	117	0.161879	0.252668
ENSG00000087301	TXNDC16	protein_coding	187	150	0.160485	0.199212
ENSG00000087302	C14orf166	protein_coding	1554	1040	7.66443	7.9377
ENSG00000087303	NID2	protein_coding	146	215	0.23714	0.540409
ENSG00000087338	GMCL1	protein_coding	66	114	0.133446	0.356696
ENSG00000087365	SF3B2	protein_coding	2749	1985	15.4825	17.3006
ENSG00000087448	KLHL42	protein_coding	19	25	0.0863659	0.175858
ENSG00000087460	GNAS	protein_coding	5896	6465	8.63209	14.6474
ENSG00000087470	DNM1L	protein_coding	565	492	0.889733	1.19897
ENSG00000087494	PTHLH	protein_coding	5	3	0.0357829	0.0332246
ENSG00000087495	PHACTR3	protein_coding	9	5	0.0034855	0.00299657
ENSG00000087502	ERGIC2	protein_coding	226	162	0.539474	0.598425
ENSG00000087510	TFAP2C	protein_coding	17	18	0.178215	0.292012
ENSG00000087586	AURKA	protein_coding	665	344	3.03229	2.42739
ENSG00000087589	CASS4	protein_coding	0	2	0	0.00670879
ENSG00000087842	PIR	protein_coding	136	60	0.130845	0.0893312
ENSG00000087884	AAMDC	protein_coding	48	55	0.05161	0.0915141
ENSG00000087903	RFX2	protein_coding	26	37	0.0131813	0.0290281
ENSG00000087995	METTL2A	protein_coding	177	76	0.687117	0.456566
ENSG00000088002	SULT2B1	protein_coding	8	4	0.0176796	0.0136797
ENSG00000088035	ALG6	protein_coding	575	350	0.847788	0.798583
ENSG00000088038	CNOT3	protein_coding	0	2	0	0.0180391
ENSG00000088053	GP6	protein_coding	0	0	0	0
ENSG00000088179	PTPN4	protein_coding	15	43	0.00700151	0.03106
ENSG00000088205	DDX18	protein_coding	875	613	5.16431	5.59883
ENSG00000088247	KHSRP	protein_coding	1559	1240	14.2517	17.5418
ENSG00000088256	GNA11	protein_coding	93	115	0.328835	0.629252
ENSG00000088280	ASAP3	protein_coding	0	0	0	0
ENSG00000088298	EDEM2	protein_coding	45	49	0.147118	0.247904
ENSG00000088305	DNMT3B	protein_coding	149	179	0.33194	0.617105
ENSG00000088320	REM1	protein_coding	0	0	0	0
ENSG00000088325	TPX2	protein_coding	1011	989	1.69177	2.56105
ENSG00000088340	FER1L4	transcribed_unitary_pseudogene	1	14	0.00214319	0.0464325
ENSG00000088356	PDRG1	protein_coding	170	158	2.29511	3.30099
ENSG00000088367	EPB41L1	protein_coding	39	64	0.0288833	0.0733492
ENSG00000088386	SLC15A1	protein_coding	0	3	0	0.00705565
ENSG00000088387	DOCK9	protein_coding	88	139	0.0314077	0.0767716
ENSG00000088448	ANKRD10	protein_coding	69	186	0.197657	0.824534
ENSG00000088451	TGDS	protein_coding	174	162	0.819921	1.18133
ENSG00000088538	DOCK3	protein_coding	29	220	0.00428046	0.0502513
ENSG00000088543	C3orf18	protein_coding	1	8	0.00804765	0.0996303
ENSG00000088682	COQ9	protein_coding	90	65	0.679946	0.759937
ENSG00000088726	TMEM40	protein_coding	0	0	0	0
ENSG00000088727	KIF9	protein_coding	38	42	0.0717436	0.12271
ENSG00000088756	ARHGAP28	protein_coding	9	20	0.00506343	0.0174126
ENSG00000088766	CRLS1	protein_coding	96	91	0.295778	0.433878
ENSG00000088782	DEFB127	protein_coding	0	0	0	0
ENSG00000088808	PPP1R13B	protein_coding	45	71	0.0413651	0.100998
ENSG00000088812	ATRN	protein_coding	290	276	0.168515	0.248188
ENSG00000088826	SMOX	protein_coding	16	19	0.0250764	0.0460819
ENSG00000088827	SIGLEC1	protein_coding	0	0	0	0
ENSG00000088832	FKBP1A	protein_coding	75	66	0.324376	0.441737
ENSG00000088833	NSFL1C	protein_coding	286	210	0.94467	1.07341
ENSG00000088836	SLC4A11	protein_coding	28	32	0.248855	0.44012
ENSG00000088854	C20orf194	protein_coding	70	124	0.0462671	0.126832
ENSG00000088876	ZNF343	protein_coding	22	35	0.0536809	0.132159
ENSG00000088881	EBF4	protein_coding	7	38	0.0108954	0.0915291
ENSG00000088882	CPXM1	protein_coding	0	0	0	0
ENSG00000088888	MAVS	protein_coding	108	160	0.385388	0.883542
ENSG00000088899	LZTS3	protein_coding	13	24	0.12394	0.354089
ENSG00000088926	F11	protein_coding	0	0	0	0
ENSG00000088930	XRN2	protein_coding	771	658	0.932461	1.2315
ENSG00000088970	KIZ	protein_coding	78	66	0.0676575	0.0885927
ENSG00000088986	DYNLL1	protein_coding	681	425	2.48786	2.4027
ENSG00000088992	TESC	protein_coding	32	34	0.0552966	0.0909201
ENSG00000089006	SNX5	protein_coding	654	643	2.49916	3.80241
ENSG00000089009	RPL6	protein_coding	1020	740	7.8201	8.77963
ENSG00000089012	SIRPG	protein_coding	0	0	0	0
ENSG00000089022	MAPKAPK5	protein_coding	41	62	0.0711968	0.16661
ENSG00000089041	P2RX7	protein_coding	0	1	0	0.00293289
ENSG00000089048	ESF1	protein_coding	645	610	0.956496	1.39986
ENSG00000089050	RBBP9	protein_coding	40	36	0.391045	0.54463
ENSG00000089053	ANAPC5	protein_coding	1073	647	1.2251	1.14316
ENSG00000089057	SLC23A2	protein_coding	148	159	0.0980591	0.163026
ENSG00000089060	SLC8B1	protein_coding	23	37	0.039628	0.0986524
ENSG00000089063	TMEM230	protein_coding	58	48	0.135259	0.173225
ENSG00000089091	DZANK1	protein_coding	9	22	0.0112232	0.0424549
ENSG00000089094	KDM2B	protein_coding	114	213	0.0785246	0.227045
ENSG00000089101	CFAP61	protein_coding	1	3	0.000339544	0.00157634
ENSG00000089116	LHX5	protein_coding	0	0	0	0
ENSG00000089123	TASP1	protein_coding	24	32	0.0100639	0.0207654
ENSG00000089127	OAS1	protein_coding	0	0	0	0
ENSG00000089154	GCN1	protein_coding	813	829	1.26023	1.98859
ENSG00000089157	RPLP0	protein_coding	923	688	21.2277	24.4862
ENSG00000089159	PXN	protein_coding	95	122	0.17966	0.357043
ENSG00000089163	SIRT4	protein_coding	5	6	0.0478524	0.0888623
ENSG00000089169	RPH3A	protein_coding	0	0	0	0
ENSG00000089177	KIF16B	protein_coding	129	154	0.044798	0.0827603
ENSG00000089195	TRMT6	protein_coding	412	227	3.23575	2.7589
ENSG00000089199	CHGB	protein_coding	0	1	0	0.0116234
ENSG00000089220	PEBP1	protein_coding	553	497	5.94921	8.27414
ENSG00000089225	TBX5	protein_coding	0	0	0	0
ENSG00000089234	BRAP	protein_coding	178	113	0.424866	0.417391
ENSG00000089248	ERP29	protein_coding	508	323	5.24457	5.16037
ENSG00000089250	NOS1	protein_coding	0	0	0	0
ENSG00000089280	FUS	protein_coding	3189	3177	22.6059	34.8512
ENSG00000089289	IGBP1	protein_coding	94	135	0.2992	0.664967
ENSG00000089327	FXYD5	protein_coding	47	103	0.324551	1.10066
ENSG00000089335	ZNF302	protein_coding	41	70	0.489826	1.29416
ENSG00000089351	GRAMD1A	protein_coding	172	402	0.567998	2.05436
ENSG00000089356	FXYD3	protein_coding	0	0	0	0
ENSG00000089472	HEPH	protein_coding	0	0	0	0
ENSG00000089486	CDIP1	protein_coding	4	5	0.0148673	0.0287591
ENSG00000089505	CMTM1	protein_coding	2	3	0.0164211	0.0381177
ENSG00000089558	KCNH4	protein_coding	3	2	0.0128724	0.01328
ENSG00000089597	GANAB	protein_coding	3351	2399	16.0112	17.7383
ENSG00000089639	GMIP	protein_coding	38	136	0.28019	1.55182
ENSG00000089682	RBM41	protein_coding	132	155	0.253896	0.461366
ENSG00000089685	BIRC5	protein_coding	453	281	4.13969	3.97382
ENSG00000089692	LAG3	protein_coding	0	0	0	0
ENSG00000089693	MLF2	protein_coding	428	376	2.29915	3.12568
ENSG00000089723	OTUB2	protein_coding	0	0	0	0
ENSG00000089737	DDX24	protein_coding	1	2	0.00317535	0.00982774
ENSG00000089775	ZBTB25	protein_coding	33	61	0.0615463	0.176056
ENSG00000089818	NECAP1	protein_coding	192	173	1.29115	1.80034
ENSG00000089820	ARHGAP4	protein_coding	0	8	0	0.0468821
ENSG00000089847	ANKRD24	protein_coding	0	7	0	0.0273403
ENSG00000089876	DHX32	protein_coding	103	105	0.179339	0.282918
ENSG00000089902	RCOR1	protein_coding	170	156	0.128987	0.18317
ENSG00000089916	GPATCH2L	protein_coding	146	148	0.14916	0.233987
ENSG00000090006	LTBP4	protein_coding	85	206	0.240814	0.903156
ENSG00000090013	BLVRB	protein_coding	99	156	0.573882	1.39941
ENSG00000090020	SLC9A1	protein_coding	48	46	0.0736851	0.109277
ENSG00000090054	SPTLC1	protein_coding	687	632	0.862137	1.22735
ENSG00000090060	PAPOLA	protein_coding	448	263	0.71378	0.648447
ENSG00000090061	CCNK	protein_coding	102	55	0.198115	0.165315
ENSG00000090097	PCBP4	protein_coding	10	16	0.0631792	0.156432
ENSG00000090104	RGS1	protein_coding	0	0	0	0
ENSG00000090238	YPEL3	protein_coding	47	82	1.06872	2.88544
ENSG00000090263	MRPS33	protein_coding	393	281	3.25897	3.60601
ENSG00000090266	NDUFB2	protein_coding	982	439	3.20985	2.2206
ENSG00000090273	NUDC	protein_coding	967	439	2.1703	1.52472
ENSG00000090316	MAEA	protein_coding	259	265	0.538853	0.853196
ENSG00000090339	ICAM1	protein_coding	0	4	0	0.041046
ENSG00000090372	STRN4	protein_coding	170	296	0.64717	1.74379
ENSG00000090376	IRAK3	protein_coding	0	0	0	0
ENSG00000090382	LYZ	protein_coding	0	0	0	0
ENSG00000090402	SI	protein_coding	0	0	0	0
ENSG00000090432	MUL1	protein_coding	82	61	0.984712	1.13359
ENSG00000090447	TFAP4	protein_coding	91	93	0.599281	0.947773
ENSG00000090470	PDCD7	protein_coding	66	75	0.419643	0.737954
ENSG00000090487	SPG21	protein_coding	142	125	0.5445	0.74174
ENSG00000090512	FETUB	protein_coding	0	0	0	0
ENSG00000090520	DNAJB11	protein_coding	248	166	1.41057	1.46111
ENSG00000090530	P3H2	protein_coding	13	8	0.00820933	0.00781783
ENSG00000090534	THPO	protein_coding	0	0	0	0
ENSG00000090539	CHRD	protein_coding	0	6	0	0.0911121
ENSG00000090554	FLT3LG	protein_coding	0	0	0	0
ENSG00000090565	RAB11FIP3	protein_coding	1	3	0.00107445	0.00498814
ENSG00000090581	GNPTG	protein_coding	29	42	0.248927	0.557898
ENSG00000090612	ZNF268	protein_coding	20	22	0.0626177	0.106591
ENSG00000090615	GOLGA3	protein_coding	58	112	0.10124	0.302534
ENSG00000090621	PABPC4	protein_coding	581	442	3.80582	4.4805
ENSG00000090659	CD209	protein_coding	6	2	0.0829298	0.0427781
ENSG00000090661	CERS4	protein_coding	43	32	0.0808044	0.093057
ENSG00000090674	MCOLN1	protein_coding	37	47	0.34011	0.668572
ENSG00000090686	USP48	protein_coding	650	690	0.645893	1.06103
ENSG00000090776	EFNB1	protein_coding	37	38	0.294412	0.467918
ENSG00000090857	PDPR	protein_coding	83	143	0.177572	0.473441
ENSG00000090861	AARS	protein_coding	1644	2514	4.61849	10.9294
ENSG00000090863	GLG1	protein_coding	1219	1365	0.798661	1.38396
ENSG00000090889	KIF4A	protein_coding	407	486	0.325753	0.601954
ENSG00000090905	TNRC6A	protein_coding	218	264	0.104921	0.196626
ENSG00000090924	PLEKHG2	protein_coding	31	114	0.204911	1.16612
ENSG00000090932	DLL3	protein_coding	35	21	0.382031	0.354717
ENSG00000090971	NAT14	protein_coding	94	90	3.83489	5.68199
ENSG00000090975	PITPNM2	protein_coding	8	28	0.00502684	0.0272267
ENSG00000090989	EXOC1	protein_coding	225	245	0.457901	0.771592
ENSG00000091009	RBM27	protein_coding	84	66	0.102768	0.124956
ENSG00000091010	POU4F3	protein_coding	0	0	0	0
ENSG00000091039	OSBPL8	protein_coding	334	409	0.168023	0.318404
ENSG00000091073	DTX2	protein_coding	3	2	0.00708328	0.00730761
ENSG00000091106	NLRC4	protein_coding	0	0	0	0
ENSG00000091127	PUS7	protein_coding	368	288	0.466169	0.564574
ENSG00000091128	LAMB4	protein_coding	0	2	0	0.00303227
ENSG00000091129	NRCAM	protein_coding	96	163	0.0325007	0.0853966
ENSG00000091136	LAMB1	protein_coding	915	876	1.20504	1.78532
ENSG00000091137	SLC26A4	protein_coding	2	1	0.00366047	0.0028323
ENSG00000091138	SLC26A3	protein_coding	0	0	0	0
ENSG00000091140	DLD	protein_coding	980	948	2.5159	3.76625
ENSG00000091157	WDR7	protein_coding	72	85	0.0195563	0.0357278
ENSG00000091164	TXNL1	protein_coding	627	343	1.20625	1.02117
ENSG00000091181	IL5RA	protein_coding	0	0	0	0
ENSG00000091262	ABCC6	protein_coding	0	0	0	0
ENSG00000091317	CMTM6	protein_coding	280	217	1.32598	1.59027
ENSG00000091409	ITGA6	protein_coding	230	254	0.304933	0.521125
ENSG00000091428	RAPGEF4	protein_coding	33	52	0.0108722	0.0265119
ENSG00000091436	AC013461.1	protein_coding	196	125	0.106504	0.105112
ENSG00000091482	SMPX	protein_coding	1	0	0.00200497	0
ENSG00000091483	FH	protein_coding	1207	744	5.69994	5.43711
ENSG00000091490	SEL1L3	protein_coding	30	50	0.0269853	0.0695999
ENSG00000091513	TF	protein_coding	0	1	0	0.0048996
ENSG00000091527	CDV3	protein_coding	507	389	3.20919	3.81039
ENSG00000091536	MYO15A	protein_coding	1	5	0.00147184	0.0113884
ENSG00000091542	ALKBH5	protein_coding	159	214	0.619055	1.28937
ENSG00000091583	APOH	protein_coding	0	0	0	0
ENSG00000091592	NLRP1	protein_coding	8	32	0.00697636	0.0431838
ENSG00000091622	PITPNM3	protein_coding	4	25	0.00397767	0.0384717
ENSG00000091640	SPAG7	protein_coding	108	99	1.30699	1.85402
ENSG00000091651	ORC6	protein_coding	454	393	5.42827	7.27161
ENSG00000091656	ZFHX4	protein_coding	211	169	0.118666	0.147083
ENSG00000091664	SLC17A6	protein_coding	0	0	0	0
ENSG00000091704	CPA1	protein_coding	0	0	0	0
ENSG00000091732	ZC3HC1	protein_coding	134	138	0.42279	0.6738
ENSG00000091831	ESR1	protein_coding	0	0	0	0
ENSG00000091844	RGS17	protein_coding	6	6	0.00495194	0.00766316
ENSG00000091879	ANGPT2	protein_coding	0	2	0	0.00507965
ENSG00000091947	TMEM101	protein_coding	84	124	0.688931	1.5738
ENSG00000091972	CD200	protein_coding	0	0	0	0
ENSG00000091986	CCDC80	protein_coding	29	30	0.0575434	0.0921194
ENSG00000092009	CMA1	protein_coding	0	2	0	0.111182
ENSG00000092010	PSME1	protein_coding	252	228	9.38441	13.1393
ENSG00000092020	PPP2R3C	protein_coding	159	142	0.449066	0.620631
ENSG00000092036	HAUS4	protein_coding	80	116	0.765638	1.718
ENSG00000092051	JPH4	protein_coding	0	1	0	0.0150415
ENSG00000092054	MYH7	protein_coding	0	0	0	0
ENSG00000092067	CEBPE	protein_coding	0	0	0	0
ENSG00000092068	SLC7A8	protein_coding	70	114	0.125472	0.316218
ENSG00000092094	OSGEP	protein_coding	247	289	2.97263	5.38237
ENSG00000092096	SLC22A17.1	protein_coding	3	7	0.0475149	0.171569
ENSG00000092098	RNF31	protein_coding	28	39	0.209602	0.451787
ENSG00000092108	SCFD1	protein_coding	362	354	0.333163	0.504178
ENSG00000092140	G2E3	protein_coding	195	161	0.33484	0.42782
ENSG00000092148	HECTD1	protein_coding	826	834	0.802612	1.25408
ENSG00000092199	HNRNPC	protein_coding	2507	2103	4.34635	5.64212
ENSG00000092200	RPGRIP1	protein_coding	0	1	0	0.0025557
ENSG00000092201	SUPT16H	protein_coding	2544	3111	8.1175	15.3616
ENSG00000092203	TOX4	protein_coding	162	108	0.750798	0.774576
ENSG00000092208	GEMIN2	protein_coding	209	138	0.961299	0.982254
ENSG00000092295	TGM1	protein_coding	0	0	0	0
ENSG00000092330	TINF2	protein_coding	45	40	1.55309	2.13637
ENSG00000092345	DAZL	protein_coding	0	0	0	0
ENSG00000092377	TBL1Y	protein_coding	0	0	0	0
ENSG00000092421	SEMA6A	protein_coding	68	99	0.0541869	0.122082
ENSG00000092439	TRPM7	protein_coding	151	308	0.117618	0.371262
ENSG00000092445	TYRO3	protein_coding	61	70	0.246344	0.437464
ENSG00000092470	WDR76	protein_coding	478	478	1.20654	1.86713
ENSG00000092529	CAPN3	protein_coding	0	1	0	0.00306588
ENSG00000092531	SNAP23	protein_coding	324	279	0.626423	0.834756
ENSG00000092607	TBX15	protein_coding	0	0	0	0
ENSG00000092621	PHGDH	protein_coding	1758	3103	2.1792	5.9524
ENSG00000092758	COL9A3	protein_coding	6	18	0.0251991	0.116987
ENSG00000092820	EZR	protein_coding	550	573	1.07233	1.72883
ENSG00000092841	MYL6	protein_coding	1055	787	20.6895	23.8838
ENSG00000092847	AGO1	protein_coding	92	178	0.158548	0.474708
ENSG00000092850	TEKT2	protein_coding	4	4	0.0996369	0.154189
ENSG00000092853	CLSPN	protein_coding	841	855	1.76895	2.78303
ENSG00000092871	RFFL	protein_coding	8	23	0.0100462	0.0446963
ENSG00000092929	UNC13D	protein_coding	0	0	0	0
ENSG00000092931	MFSD11	protein_coding	110	162	0.252513	0.575491
ENSG00000092964	DPYSL2	protein_coding	200	146	0.14518	0.164007
ENSG00000092969	TGFB2	protein_coding	4	11	0.00425445	0.0181054
ENSG00000092978	GPATCH2	protein_coding	304	285	0.15587	0.226134
ENSG00000093000	NUP50	protein_coding	67	85	0.290015	0.569374
ENSG00000093009	CDC45	protein_coding	960	1158	2.44102	4.55661
ENSG00000093010	COMT	protein_coding	235	240	0.866835	1.36997
ENSG00000093072	CECR1	protein_coding	0	2	0	0.00749707
ENSG00000093100	XXbac-B461K10.4	processed_transcript	1	0	0.00438831	0
ENSG00000093134	VNN3	protein_coding	0	0	0	0
[truncated: 55,994 more rows]

## Sheet: Column definition
Sheet 1: FPKM data
Ensemble Gene ID	Ensemble Gene ID
Gene name	Gene name
Gene type	Gene type
Counts	Mapping counts of Ribo-seq samples
FPKM	Average RNA abundance (FPKM) of Ribo-seq samples
HEK293T	HEK293T samples
RPS25-AP	RPS25-AP HEK293T stable cell line samples
