# Supplementary material for: OptoRibo-seq for spatiotemporally resolved mapping of local protein translatome
Source: Research Square preprint supplement (doi:10.21203/rs.3.rs-3982122/v1), 2024-03-05
Supplement: Supplementary file 3 [file bf174a1a8e77b74278a67bb4.xlsx]

## Sheet: mRNA dynamics
Ensemble Gene ID	Gene name	Gene type	UniprotID	Log2 (mRNA Tg/Basal)	P-adj (mRNA Tg/Basal)	Dynamic type
ENSG00000000003	TSPAN6	protein_coding	O43657	-0.151351	0.34156	Other
ENSG00000000005	TNMD	protein_coding	Q9H2S6	-0.561435	NA	Other
ENSG00000000419	DPM1	protein_coding	O60762	0.0843985	0.675456	Other
ENSG00000000457	SCYL3	protein_coding	Q8IZE3	0.00281944	0.994692	Other
ENSG00000000460	C1orf112	protein_coding	#N/A	-0.127424	0.559812	Other
ENSG00000000938	FGR	protein_coding	P09769	NA	NA	Other
ENSG00000000971	CFH	protein_coding	P08603	-1.72586	NA	Other
ENSG00000001036	FUCA2	protein_coding	Q9BTY2	0.117034	0.483456	Other
ENSG00000001084	GCLC	protein_coding	P48506	0.24899	0.18467	Other
ENSG00000001167	NFYA	protein_coding	P23511	-0.0341182	0.892134	Other
ENSG00000001460	STPG1	protein_coding	Q5TH74	-0.109581	0.711301	Other
ENSG00000001461	NIPAL3	protein_coding	Q6P499	0.159136	0.404306	Stress-activated
ENSG00000001497	LAS1L	protein_coding	Q9Y4W2	0.0977426	0.491774	Other
ENSG00000001561	ENPP4	protein_coding	Q9Y6X5	-0.330113	0.270145	Other
ENSG00000001617	SEMA3F	protein_coding	Q13275	-0.915807	0.00030669	Other
ENSG00000001626	CFTR	protein_coding	P13569	-1.03026	NA	Other
ENSG00000001629	ANKIB1	protein_coding	Q9P2G1	-0.271682	0.253166	Other
ENSG00000001630	CYP51A1	protein_coding	Q16850	0.121108	0.834907	Other
ENSG00000001631	KRIT1	protein_coding	O00522	0.0403314	0.876445	Other
ENSG00000002016	RAD52	protein_coding	P43351	-0.157807	0.522456	Other
ENSG00000002079	MYH16	unitary_pseudogene	Q9H6N6	-0.40189	NA	Other
ENSG00000002330	BAD	protein_coding	Q92934	0.56338	0.14379	Other
ENSG00000002549	LAP3	protein_coding	P28838	0.216072	0.0743042	Other
ENSG00000002586	CD99	protein_coding	P14209	0.116702	0.393928	Other
ENSG00000002587	HS3ST1	protein_coding	O14792	NA	NA	Other
ENSG00000002726	AOC1	protein_coding	P19801	-0.875617	NA	Other
ENSG00000002745	WNT16	protein_coding	Q9UBV4	0.331072	NA	Other
ENSG00000002746	HECW1	protein_coding	Q76N89	-0.738124	NA	Other
ENSG00000002822	MAD1L1	protein_coding	Q9Y6D9	0.250655	0.181575	Other
ENSG00000002834	LASP1	protein_coding	Q14847	-0.451353	0.0156852	Other
ENSG00000002919	SNX11	protein_coding	Q9Y5W9	-0.0157841	0.957439	Other
ENSG00000002933	TMEM176A	protein_coding	Q96HP8	NA	NA	Other
ENSG00000003056	M6PR	protein_coding	P20645	-0.132823	0.443795	Other
ENSG00000003096	KLHL13	protein_coding	Q9P2N7	-0.620435	0.0125116	Other
ENSG00000003137	CYP26B1	protein_coding	Q9NR63	-0.20522	0.665578	Other
ENSG00000003147	ICA1	protein_coding	Q05084	0.831246	0.0365844	Other
ENSG00000003249	DBNDD1	protein_coding	Q9H9R9	-0.279875	0.284016	Other
ENSG00000003393	ALS2	protein_coding	Q96Q42	-0.286317	0.117524	Other
ENSG00000003400	CASP10	protein_coding	Q92851	-0.794625	0.168661	Other
ENSG00000003402	CFLAR	protein_coding	O15519	-0.174416	0.562085	Other
ENSG00000003436	TFPI	protein_coding	P10646	-0.835751	0.116835	Other
ENSG00000003509	NDUFAF7	protein_coding	Q7L592	-0.149815	0.601596	Other
ENSG00000003756	RBM5	protein_coding	P52756	0.0184775	0.917424	Other
ENSG00000003987	MTMR7	protein_coding	Q9Y216	-0.061294	0.944867	Other
ENSG00000003989	SLC7A2	protein_coding	P52569	-0.461189	0.0211242	Other
ENSG00000004059	ARF5	protein_coding	P84085	0.206043	0.254315	Other
ENSG00000004139	SARM1	protein_coding	Q6SZW1	0.200647	0.549118	Stress-activated
ENSG00000004142	POLDIP2	protein_coding	Q9Y2S7	0.318671	0.00201425	Other
ENSG00000004399	PLXND1	protein_coding	Q9Y4D7	-0.482724	0.0639572	Other
ENSG00000004455	AK2	protein_coding	P54819	0.156558	0.0986961	Other
ENSG00000004468	CD38	protein_coding	P28907	2.1768	NA	Other
ENSG00000004478	FKBP4	protein_coding	Q02790	-0.0526024	0.734574	Other
ENSG00000004487	KDM1A	protein_coding	O60341	-0.0847321	0.515491	Other
ENSG00000004534	RBM6	protein_coding	P78332	0.0312063	0.841513	Other
ENSG00000004660	CAMKK1	protein_coding	Q8N5S9	-0.227728	0.374493	Other
ENSG00000004700	RECQL	protein_coding	P46063	0.14512	0.561222	Other
ENSG00000004766	VPS50	protein_coding	Q96JG6	-0.210733	0.369471	Other
ENSG00000004776	HSPB6	protein_coding	O14558	2.08053	NA	Other
ENSG00000004777	ARHGAP33	protein_coding	O14559	0.169061	0.667955	Other
ENSG00000004779	NDUFAB1	protein_coding	O14561	0.160476	0.293357	Other
ENSG00000004799	PDK4	protein_coding	Q16654	-0.620838	NA	Other
ENSG00000004809	SLC22A16	protein_coding	Q86VW1	NA	NA	Other
ENSG00000004838	ZMYND10	protein_coding	O75800	0.669279	0.144925	Other
ENSG00000004846	ABCB5	protein_coding	Q2M3G0	-1.88007	NA	Other
ENSG00000004848	ARX	protein_coding	Q96QS3	0.375308	NA	Other
ENSG00000004864	SLC25A13	protein_coding	Q9UJS0	0.086998	0.617241	Other
ENSG00000004866	ST7	protein_coding	Q9NRC1	0.335781	0.120188	Other
ENSG00000004897	CDC27	protein_coding	P30260	-0.161709	0.392848	Other
ENSG00000004939	SLC4A1	protein_coding	P02730	-0.762263	NA	Other
ENSG00000004948	CALCR	protein_coding	P30988	-0.0866384	NA	Other
ENSG00000004961	HCCS	protein_coding	P53701	0.229588	0.139227	Other
ENSG00000004975	DVL2	protein_coding	O14641	0.172189	0.248005	Other
ENSG00000005001	PRSS22	protein_coding	Q9GZN4	NA	NA	Other
ENSG00000005007	UPF1	protein_coding	Q92900	0.18526	0.0767789	Basal-specific
ENSG00000005020	SKAP2	protein_coding	O75563	-0.537139	0.000799446	Other
ENSG00000005022	SLC25A5	protein_coding	P05141	-0.116419	0.321114	Other
ENSG00000005059	MCUB	protein_coding	Q9NWR8	-0.0440304	0.877637	Other
ENSG00000005073	HOXA11	protein_coding	P31270	0.336039	0.0823294	Other
ENSG00000005075	POLR2J	protein_coding	P52435	0.392561	0.0160689	Other
ENSG00000005100	DHX33	protein_coding	Q9H6R0	0.142741	0.335341	Other
ENSG00000005102	MEOX1	protein_coding	P50221	-3.23508	NA	Other
ENSG00000005108	THSD7A	protein_coding	Q9UPZ6	-1.12142	NA	Other
ENSG00000005156	LIG3	protein_coding	P49916	0.264784	0.111999	Other
ENSG00000005175	RPAP3	protein_coding	Q9H6T3	-0.0220958	0.938146	Other
ENSG00000005187	ACSM3	protein_coding	Q53FZ2	-0.977906	NA	Other
ENSG00000005189	AC004381.6	protein_coding	#N/A	-0.057885	0.831168	Other
ENSG00000005194	CIAPIN1	protein_coding	Q6FI81	0.163196	0.232063	Other
ENSG00000005206	SPPL2B	protein_coding	Q8TCT7	0.272153	0.210587	Stress-activated
ENSG00000005238	FAM214B	protein_coding	Q7L5A3	0.442643	0.43968	Other
ENSG00000005243	COPZ2	protein_coding	Q9P299	0.634342	NA	Other
ENSG00000005249	PRKAR2B	protein_coding	P31323	-0.470613	0.0968437	Other
ENSG00000005302	MSL3	protein_coding	Q8N5Y2	-0.027294	0.923177	Other
ENSG00000005339	CREBBP	protein_coding	Q92793	0.218246	0.09166	Other
ENSG00000005379	TSPOAP1	protein_coding	O95153	2.76344	NA	Other
ENSG00000005381	MPO	protein_coding	P05164	-0.875617	NA	Other
ENSG00000005421	PON1	protein_coding	P27169	-0.875617	NA	Other
ENSG00000005436	GCFC2	protein_coding	P16383	-0.0300502	0.918042	Other
ENSG00000005448	WDR54	protein_coding	Q9H977	0.0857193	0.707595	Other
ENSG00000005469	CROT	protein_coding	Q9UKG9	-0.785825	0.0242886	Other
ENSG00000005471	ABCB4	protein_coding	P21439	-1.17368	NA	Other
ENSG00000005483	KMT2E	protein_coding	Q8IZD2	-0.187945	0.318635	Other
ENSG00000005486	RHBDD2	protein_coding	Q6NTF9	0.477815	0.000931971	Other
ENSG00000005513	SOX8	protein_coding	P57073	-0.439322	0.358734	Other
ENSG00000005700	IBTK	protein_coding	Q9P2D0	0.38488	0.588132	Other
ENSG00000005801	ZNF195	protein_coding	O14628	-0.0635553	0.786282	Other
ENSG00000005810	MYCBP2	protein_coding	O75592	-0.143115	0.368846	Other
ENSG00000005812	FBXL3	protein_coding	Q9UKT7	-0.334919	0.0921279	Other
ENSG00000005844	ITGAL	protein_coding	P20701	1.32954	NA	Other
ENSG00000005882	PDK2	protein_coding	Q15119	0.288024	0.315626	Other
ENSG00000005884	ITGA3	protein_coding	P26006	0.0246676	0.963798	Other
ENSG00000005889	ZFX	protein_coding	P17010	-0.0546254	0.812436	Other
ENSG00000005893	LAMP2	protein_coding	P13473	-0.13062	0.42269	Other
ENSG00000005961	ITGA2B	protein_coding	P08514	-0.620262	0.166041	Other
ENSG00000005981	ASB4	protein_coding	Q9Y574	0.155424	NA	Other
ENSG00000006007	GDE1	protein_coding	Q9NZC3	-0.0136476	0.953451	Other
ENSG00000006015	C19orf60	protein_coding	#N/A	0.666715	0.00190746	Other
ENSG00000006016	CRLF1	protein_coding	O75462	-1.1968	NA	Other
ENSG00000006025	OSBPL7	protein_coding	Q9BZF2	0.0879052	0.862391	Other
ENSG00000006042	TMEM98	protein_coding	Q9Y2Y6	-0.17112	0.435143	Other
ENSG00000006047	YBX2	protein_coding	Q9Y2T7	-0.473557	NA	Other
ENSG00000006059	KRT33A	protein_coding	O76009	NA	NA	Other
ENSG00000006062	MAP3K14	protein_coding	Q99558	0.103638	0.812628	Other
ENSG00000006071	ABCC8	protein_coding	Q09428	0.156501	NA	Other
ENSG00000006116	CACNG3	protein_coding	O60359	NA	NA	Other
ENSG00000006118	TMEM132A	protein_coding	Q24JP5	-0.0571576	0.858713	Basal-specific
ENSG00000006125	AP2B1	protein_coding	P63010	-0.104683	0.398449	Other
ENSG00000006128	TAC1	protein_coding	P20366	2.62078	NA	Other
ENSG00000006194	ZNF263	protein_coding	O14978	0.154544	0.33646	Other
ENSG00000006210	CX3CL1	protein_coding	P78423	1.88473	NA	Other
ENSG00000006282	SPATA20	protein_coding	Q8TB22	0.267065	0.235414	Stress-activated
ENSG00000006283	CACNA1G	protein_coding	O43497	-1.09145	NA	Other
ENSG00000006327	TNFRSF12A	protein_coding	Q9NP84	-0.0291608	0.933993	Other
ENSG00000006377	DLX6	protein_coding	P56179	-0.191747	0.712161	Other
ENSG00000006432	MAP3K9	protein_coding	P80192	-0.066268	0.815836	Other
ENSG00000006451	RALA	protein_coding	P11233	0.1466	0.412739	Other
ENSG00000006453	BAIAP2L1	protein_coding	Q9UHR4	-0.191326	0.445032	Other
ENSG00000006459	KDM7A	protein_coding	Q6ZMT4	-0.0929399	0.790354	Other
ENSG00000006468	ETV1	protein_coding	P50549	-1.28636	NA	Other
ENSG00000006530	AGK	protein_coding	Q53H12	-0.188909	0.437454	Other
ENSG00000006534	ALDH3B1	protein_coding	P43353	-0.356927	0.658191	Other
ENSG00000006555	TTC22	protein_coding	#N/A	NA	NA	Other
ENSG00000006576	PHTF2	protein_coding	Q8N3S3	-0.103117	0.745653	Other
ENSG00000006606	CCL26	protein_coding	Q9Y258	NA	NA	Other
ENSG00000006607	FARP2	protein_coding	O94887	-0.30135	0.0563358	Other
ENSG00000006611	USH1C	protein_coding	Q9Y6N9	-1.26307	NA	Other
ENSG00000006625	GGCT	protein_coding	O75223	0.19018	0.402149	Other
ENSG00000006634	DBF4	protein_coding	Q9UBU7	-0.0660451	0.792118	Other
ENSG00000006638	TBXA2R	protein_coding	P21731	-0.427132	NA	Other
ENSG00000006652	IFRD1	protein_coding	O00458	0.423076	6.2721e-05	Other
ENSG00000006659	LGALS14	protein_coding	Q8TCE9	NA	NA	Other
ENSG00000006695	COX10	protein_coding	Q12887	0.217362	0.307148	Other
ENSG00000006704	GTF2IRD1	protein_coding	Q9UHL9	-0.0384868	0.89807	Other
ENSG00000006712	PAF1	protein_coding	Q8N7H5	0.215103	0.073057	Other
ENSG00000006715	VPS41	protein_coding	P49754	-0.232608	0.145101	Other
ENSG00000006740	ARHGAP44	protein_coding	Q17R89	0.0244426	0.954394	Other
ENSG00000006744	ELAC2	protein_coding	Q9BQ52	0.155214	0.27047	Other
ENSG00000006747	SCIN	protein_coding	Q9Y6U3	-1.73482	NA	Other
ENSG00000006756	ARSD	protein_coding	P51689	2.09695	NA	Other
ENSG00000006757	PNPLA4	protein_coding	P41247	0.0523887	0.929322	Other
ENSG00000006788	MYH13	protein_coding	Q9UKX3	NA	NA	Other
ENSG00000006831	ADIPOR2	protein_coding	Q86V24	0.0375701	0.838429	Other
ENSG00000006837	CDKL3	protein_coding	Q8IVW4	-0.200027	NA	Other
ENSG00000007001	UPP2	protein_coding	O95045	0.15845	NA	Other
ENSG00000007038	PRSS21	protein_coding	Q9Y6M0	NA	NA	Other
ENSG00000007047	MARK4	protein_coding	Q96L34	-0.275086	0.266624	Other
ENSG00000007062	PROM1	protein_coding	O43490	-0.661003	NA	Other
ENSG00000007080	CCDC124	protein_coding	Q96CT7	0.475254	0.00228503	Other
ENSG00000007129	CEACAM21	protein_coding	Q3KPI0	NA	NA	Other
ENSG00000007168	PAFAH1B1	protein_coding	P43034	0.00400795	0.985107	Other
ENSG00000007171	NOS2	protein_coding	P35228	-0.027368	NA	Other
ENSG00000007174	DNAH9	protein_coding	Q9NYC9	NA	NA	Other
ENSG00000007202	KIAA0100	protein_coding	Q14667	-0.0115101	0.956316	Other
ENSG00000007216	SLC13A2	protein_coding	Q13183	NA	NA	Other
ENSG00000007237	GAS7	protein_coding	O60861	-0.203583	0.788252	Other
ENSG00000007255	TRAPPC6A	protein_coding	O75865	0.751881	0.00346607	Other
ENSG00000007264	MATK	protein_coding	P42679	-0.237031	0.359155	Other
ENSG00000007306	CEACAM7	protein_coding	Q14002	NA	NA	Other
ENSG00000007312	CD79B	protein_coding	P40259	-2.30097	NA	Other
ENSG00000007314	SCN4A	protein_coding	P35499	0.21492	NA	Other
ENSG00000007341	ST7L	protein_coding	Q8TDW4	0.104996	0.745164	Other
ENSG00000007350	TKTL1	protein_coding	P51854	-0.864667	NA	Other
ENSG00000007372	PAX6	protein_coding	P26367	0.0241193	0.925357	Other
ENSG00000007376	RPUSD1	protein_coding	Q9UJJ7	0.24292	0.156341	Other
ENSG00000007384	RHBDF1	protein_coding	Q96CC6	-0.177071	0.601596	Other
ENSG00000007392	LUC7L	protein_coding	Q9NQ29	0.100283	0.517995	Other
ENSG00000007402	CACNA2D2	protein_coding	Q9NY47	-0.307593	0.424059	Basal-specific
ENSG00000007516	BAIAP3	protein_coding	O94812	0.0138818	0.984353	Other
ENSG00000007520	TSR3	protein_coding	Q9UJK0	0.520066	0.0054758	Other
ENSG00000007541	PIGQ	protein_coding	Q9BRB3	0.178647	0.448688	Other
ENSG00000007545	CRAMP1	protein_coding	Q96RY5	0.283351	0.17069	Other
ENSG00000007866	TEAD3	protein_coding	Q99594	-0.554949	0.176867	Other
ENSG00000007908	SELE	protein_coding	P16581	-1.77536	NA	Other
ENSG00000007923	DNAJC11	protein_coding	Q9NVH1	0.0265685	0.89807	Other
ENSG00000007933	FMO3	protein_coding	P31513	-0.875617	NA	Other
ENSG00000007944	MYLIP	protein_coding	Q8WY64	-0.295997	0.321824	Other
ENSG00000007952	NOX1	protein_coding	Q9Y5S8	-0.722263	NA	Other
ENSG00000007968	E2F2	protein_coding	Q14209	NA	NA	Other
ENSG00000008018	PSMB1	protein_coding	P20618	0.0668792	0.665392	Other
ENSG00000008056	SYN1	protein_coding	P17600	0.5023	NA	Other
ENSG00000008083	JARID2	protein_coding	Q92833	-0.29605	0.0716864	Other
ENSG00000008086	CDKL5	protein_coding	O76039	-0.200229	0.652463	Other
ENSG00000008118	CAMK1G	protein_coding	Q96NX5	-0.47382	NA	Other
ENSG00000008128	CDK11A	protein_coding	Q9UQ88	0.116659	NA	Other
ENSG00000008130	NADK	protein_coding	O95544	0.257719	0.0693485	Other
ENSG00000008196	TFAP2B	protein_coding	Q92481	NA	NA	Other
ENSG00000008197	TFAP2D	protein_coding	Q7Z6R9	NA	NA	Other
ENSG00000008226	DLEC1	protein_coding	Q9Y238	-0.38758	NA	Other
ENSG00000008256	CYTH3	protein_coding	O43739	-0.134932	0.562589	Other
ENSG00000008277	ADAM22	protein_coding	Q9P0K1	-0.512145	0.0325137	Other
ENSG00000008282	SYPL1	protein_coding	Q16563	-0.149945	0.489205	Other
ENSG00000008283	CYB561	protein_coding	P49447	1.23343	8.48251e-12	Other
ENSG00000008294	SPAG9	protein_coding	O60271	-0.0425988	0.848371	Other
ENSG00000008300	CELSR3	protein_coding	Q9NYQ7	0.387503	0.00143791	Stress-activated
ENSG00000008311	AASS	protein_coding	Q9UDR5	-0.456377	0.0503926	Other
ENSG00000008323	PLEKHG6	protein_coding	Q3KR16	-0.285192	NA	Other
ENSG00000008324	SS18L2	protein_coding	Q9UHA2	-0.0522475	0.845271	Other
ENSG00000008382	MPND	protein_coding	Q8N594	-0.139104	0.826724	Other
ENSG00000008394	MGST1	protein_coding	P10620	-0.305641	0.432844	Other
ENSG00000008405	CRY1	protein_coding	Q16526	0.132588	0.474383	Other
ENSG00000008438	PGLYRP1	protein_coding	O75594	-1.81548	NA	Other
ENSG00000008441	NFIX	protein_coding	Q14938	-0.163097	0.640427	Other
ENSG00000008513	ST3GAL1	protein_coding	Q11201	-0.216853	0.649816	Other
ENSG00000008516	MMP25	protein_coding	Q9NPA2	-0.743698	NA	Other
ENSG00000008517	IL32	protein_coding	P24001	-0.276421	NA	Other
ENSG00000008710	PKD1	protein_coding	P98161	0.213166	0.268662	Other
ENSG00000008735	MAPK8IP2	protein_coding	Q13387	0.160863	0.428316	Other
ENSG00000008838	MED24	protein_coding	O75448	0.105268	0.521563	Stress-activated
ENSG00000008853	RHOBTB2	protein_coding	Q9BYZ6	-0.22584	0.680931	Other
ENSG00000008869	HEATR5B	protein_coding	Q9P2D3	0.0148854	0.956276	Other
ENSG00000008952	SEC62	protein_coding	Q99442	-0.00201703	0.991968	Other
ENSG00000008988	RPS20	protein_coding	P60866	0.151729	0.178725	Other
ENSG00000009307	CSDE1	protein_coding	O75534	-0.138864	0.278712	Other
ENSG00000009335	UBE3C	protein_coding	Q15386	-0.0515828	0.712481	Other
ENSG00000009413	REV3L	protein_coding	O60673	-0.21694	0.336886	Other
ENSG00000009694	TENM1	protein_coding	Q9UKZ4	-0.292101	0.732033	Other
ENSG00000009709	PAX7	protein_coding	P23759	-2.07469	NA	Other
ENSG00000009724	MASP2	protein_coding	O00187	-0.370538	0.599584	Other
ENSG00000009765	IYD	protein_coding	Q6PHW0	1.0073	NA	Other
ENSG00000009780	FAM76A	protein_coding	Q8TAV0	-0.18271	0.451673	Other
ENSG00000009790	TRAF3IP3	protein_coding	Q9Y228	1.31586	NA	Other
ENSG00000009830	POMT2	protein_coding	Q9UKY4	0.142322	0.40513	Other
ENSG00000009844	VTA1	protein_coding	Q9NP79	-0.237446	0.118287	Other
ENSG00000009950	MLXIPL	protein_coding	Q9NP71	0.0569901	0.903285	Other
ENSG00000009954	BAZ1B	protein_coding	Q9UIG0	0.0256782	0.882413	Other
ENSG00000010017	RANBP9	protein_coding	Q96S59	0.0392497	0.867751	Other
ENSG00000010030	ETV7	protein_coding	Q9Y603	-0.376549	NA	Other
ENSG00000010072	SPRTN	protein_coding	Q9H040	-0.236799	0.159198	Other
ENSG00000010165	METTL13	protein_coding	Q8N6R0	0.115075	0.479078	Other
ENSG00000010219	DYRK4	protein_coding	Q9NR20	0.476965	0.01701	Other
ENSG00000010244	ZNF207	protein_coding	O43670	-0.127871	0.343265	Other
ENSG00000010256	UQCRC1	protein_coding	P31930	0.303332	0.0054758	Other
ENSG00000010270	STARD3NL	protein_coding	O95772	-0.134015	0.576497	Other
ENSG00000010278	CD9	protein_coding	P21926	-0.681331	0.000263165	Other
ENSG00000010282	HHATL	protein_coding	Q9HCP6	1.16405	NA	Other
ENSG00000010292	NCAPD2	protein_coding	Q15021	-0.0316432	0.829153	Basal-specific
ENSG00000010295	IFFO1	protein_coding	Q0D2I5	0.131368	0.536188	Stress-activated
ENSG00000010310	GIPR	protein_coding	P48546	-0.885761	NA	Other
ENSG00000010318	PHF7	protein_coding	Q9BWX1	-0.0118853	0.983281	Other
ENSG00000010319	SEMA3G	protein_coding	Q9NS98	-0.361345	0.495407	Other
ENSG00000010322	NISCH	protein_coding	Q9Y2I1	0.0916306	0.599308	Other
ENSG00000010327	STAB1	protein_coding	Q9NY15	0.412495	NA	Other
ENSG00000010361	FUZ	protein_coding	Q9BT04	0.15227	0.476955	Other
ENSG00000010379	SLC6A13	protein_coding	Q9NSD5	0.477951	0.520284	Other
ENSG00000010404	IDS	protein_coding	P22304	-0.214873	0.313796	Other
ENSG00000010438	PRSS3	protein_coding	P35030	0.602006	NA	Other
ENSG00000010539	ZNF200	protein_coding	P98182	0.0843294	0.757639	Other
ENSG00000010610	CD4	protein_coding	P01730	0.234353	NA	Other
ENSG00000010626	LRRC23	protein_coding	Q53EV4	0.0794253	0.911968	Other
ENSG00000010671	BTK	protein_coding	Q06187	-0.253033	NA	Other
ENSG00000010704	HFE	protein_coding	Q30201	0.340498	NA	Other
ENSG00000010803	SCMH1	protein_coding	Q96GD3	0.181594	0.325496	Other
ENSG00000010810	FYN	protein_coding	P06241	0.202539	0.156341	Other
ENSG00000010818	HIVEP2	protein_coding	P31629	-0.221479	0.284649	Other
ENSG00000010932	FMO1	protein_coding	Q01740	-0.419826	NA	Other
ENSG00000011007	TCEB3	protein_coding	#N/A	0.0668484	0.700993	Other
ENSG00000011009	LYPLA2	protein_coding	O95372	-0.0817118	0.714603	Other
ENSG00000011021	CLCN6	protein_coding	P51797	0.0135553	0.961418	Other
ENSG00000011028	MRC2	protein_coding	Q9UBG0	-0.261604	0.327818	Other
ENSG00000011052	NME1-NME2	protein_coding	#N/A	NA	NA	Other
ENSG00000011083	SLC6A7	protein_coding	Q99884	NA	NA	Other
ENSG00000011105	TSPAN9	protein_coding	O75954	-0.169964	0.636412	Other
ENSG00000011114	BTBD7	protein_coding	Q9P203	-0.569423	NA	Other
ENSG00000011132	APBA3	protein_coding	O96018	0.290863	0.279049	Other
ENSG00000011143	MKS1	protein_coding	Q9NXB0	0.459063	0.00809356	Other
ENSG00000011198	ABHD5	protein_coding	Q8WTS1	-0.0628691	0.850867	Other
ENSG00000011201	ANOS1	protein_coding	P23352	1.12607	NA	Other
ENSG00000011243	AKAP8L	protein_coding	Q9ULX6	0.147966	0.342273	Other
ENSG00000011258	MBTD1	protein_coding	Q05BQ5	-0.459029	0.0162856	Other
ENSG00000011260	UTP18	protein_coding	Q9Y5J1	0.0311856	0.879335	Other
ENSG00000011275	RNF216	protein_coding	Q9NWF9	0.286812	0.0503926	Other
ENSG00000011295	TTC19	protein_coding	Q6DKK2	0.156045	0.246168	Other
ENSG00000011304	PTBP1	protein_coding	P26599	0.144778	0.145271	Other
ENSG00000011332	DPF1	protein_coding	Q92782	0.125714	0.690225	Other
ENSG00000011347	SYT7	protein_coding	O43581	-0.359257	0.519205	Other
ENSG00000011376	LARS2	protein_coding	Q15031	-0.183749	0.18591	Other
ENSG00000011405	PIK3C2A	protein_coding	O00443	-0.2409	0.233178	Other
ENSG00000011422	PLAUR	protein_coding	Q03405	-0.493379	0.196445	Other
ENSG00000011426	ANLN	protein_coding	Q9NQW6	-0.408061	0.00651443	Other
ENSG00000011451	WIZ	protein_coding	O95785	0.432775	0.00314816	Other
ENSG00000011454	RABGAP1	protein_coding	Q9Y3P9	-0.168106	0.280971	Other
ENSG00000011465	DCN	protein_coding	P07585	0.157086	NA	Other
ENSG00000011478	QPCTL	protein_coding	Q9NXS2	0.674326	0.00124555	Other
ENSG00000011485	PPP5C	protein_coding	P53041	0.175346	0.227481	Stress-activated
ENSG00000011523	CEP68	protein_coding	Q76N32	-0.168469	0.455167	Other
ENSG00000011566	MAP4K3	protein_coding	Q8IVH8	-0.0490589	0.895621	Other
ENSG00000011590	ZBTB32	protein_coding	Q9Y2Y4	-0.178229	NA	Other
ENSG00000011600	TYROBP	protein_coding	O43914	NA	NA	Other
ENSG00000011638	TMEM159	protein_coding	Q96B96	-0.572105	0.307553	Other
ENSG00000011677	GABRA3	protein_coding	P34903	0.215607	NA	Other
ENSG00000012048	BRCA1	protein_coding	P38398	-0.155252	0.266943	Other
ENSG00000012061	ERCC1	protein_coding	P07992	0.353292	0.0298783	Other
ENSG00000012124	CD22	protein_coding	P20273	3.00816	NA	Other
ENSG00000012171	SEMA3B	protein_coding	Q13214	0.470873	0.195452	Other
ENSG00000012174	MBTPS2	protein_coding	O43462	0.00974956	0.974209	Other
ENSG00000012211	PRICKLE3	protein_coding	O43900	-0.0657086	0.872899	Other
ENSG00000012223	LTF	protein_coding	P02788	NA	NA	Other
ENSG00000012232	EXTL3	protein_coding	O43909	-0.0429813	0.855042	Other
ENSG00000012504	NR1H4	protein_coding	Q96RI1	-0.0568717	NA	Other
ENSG00000012660	ELOVL5	protein_coding	Q9NYP7	-0.119248	0.47619	Other
ENSG00000012779	ALOX5	protein_coding	P09917	NA	NA	Other
ENSG00000012817	KDM5D	protein_coding	Q9BY66	NA	NA	Other
ENSG00000012822	CALCOCO1	protein_coding	Q9P1Z2	0.171108	0.423818	Other
ENSG00000012963	UBR7	protein_coding	Q8N806	-0.254466	NA	Other
ENSG00000012983	MAP4K5	protein_coding	Q9Y4K4	-0.161498	0.489649	Other
ENSG00000013016	EHD3	protein_coding	Q9NZN3	0.540949	0.063351	Other
ENSG00000013275	PSMC4	protein_coding	P43686	0.28242	0.65644	Other
ENSG00000013288	MAN2B2	protein_coding	Q9Y2E5	-0.167237	0.531484	Stress-activated
ENSG00000013293	SLC7A14	protein_coding	Q8TBB6	NA	NA	Other
ENSG00000013297	CLDN11	protein_coding	O75508	-0.875617	NA	Other
ENSG00000013306	SLC25A39	protein_coding	Q9BZJ4	0.314076	0.0396158	Other
ENSG00000013364	MVP	protein_coding	Q14764	-0.367947	0.419251	Other
ENSG00000013374	NUB1	protein_coding	Q9Y5A7	0.120817	0.370304	Other
ENSG00000013375	PGM3	protein_coding	O95394	1.03145	6.04664e-20	Other
ENSG00000013392	RWDD2A	protein_coding	#N/A	0.729423	0.00359419	Other
ENSG00000013441	CLK1	protein_coding	P49759	0.18017	0.233134	Other
ENSG00000013503	POLR3B	protein_coding	Q9NW08	0.126489	0.625767	Other
ENSG00000013523	ANGEL1	protein_coding	Q9UNK9	0.157034	0.359545	Other
ENSG00000013561	RNF14	protein_coding	Q9UBS8	0.18455	0.243481	Other
ENSG00000013563	DNASE1L1	protein_coding	P49184	-0.205589	0.623453	Other
ENSG00000013573	DDX11	protein_coding	Q96FC9	0.159293	0.229221	Stress-activated
ENSG00000013583	HEBP1	protein_coding	Q9NRV9	0.152744	0.582528	Other
ENSG00000013588	GPRC5A	protein_coding	Q8NFJ5	-0.733512	0.101658	Other
ENSG00000013619	MAMLD1	protein_coding	Q13495	-0.556158	0.225236	Other
ENSG00000013725	CD6	protein_coding	P30203	NA	NA	Other
ENSG00000013810	TACC3	protein_coding	Q9Y6A5	0.0258798	0.897475	Other
ENSG00000014123	UFL1	protein_coding	O94874	0.545144	0.00435027	Other
ENSG00000014138	POLA2	protein_coding	Q14181	0.232305	0.047352	Other
ENSG00000014164	ZC3H3	protein_coding	Q8IXZ2	0.478458	0.0604966	Other
ENSG00000014216	CAPN1	protein_coding	P07384	-0.00571353	0.983648	Other
ENSG00000014257	ACPP	protein_coding	P15309	-0.425652	NA	Other
ENSG00000014641	MDH1	protein_coding	P40925	0.0113366	0.956063	Other
ENSG00000014824	SLC30A9	protein_coding	Q6PML9	0.0759452	0.737357	Other
ENSG00000014914	MTMR11	protein_coding	A4FU01	-0.40205	0.418771	Other
ENSG00000014919	COX15	protein_coding	Q7KZN9	0.0790576	0.692932	Other
ENSG00000015133	CCDC88C	protein_coding	Q9P219	-0.0165826	0.963048	Other
ENSG00000015153	YAF2	protein_coding	Q8IY57	-0.0668528	0.848017	Other
ENSG00000015171	ZMYND11	protein_coding	Q15326	0.0325548	0.923013	Other
ENSG00000015285	WAS	protein_coding	P42768	0.261392	NA	Other
ENSG00000015413	DPEP1	protein_coding	P16444	0.182168	NA	Other
ENSG00000015475	BID	protein_coding	P55957	-0.0650653	0.808016	Other
ENSG00000015479	MATR3.2	protein_coding	#N/A	-0.601743	0.354449	Other
ENSG00000015520	NPC1L1	protein_coding	Q9UHC9	-0.0668456	NA	Other
ENSG00000015532	XYLT2	protein_coding	Q9H1B5	0.0215785	0.948988	Other
ENSG00000015568	RGPD5	protein_coding	Q99666	-1.05665	0.103131	Other
ENSG00000015592	STMN4	protein_coding	Q9H169	-0.280623	NA	Other
ENSG00000015676	NUDCD3	protein_coding	Q8IVD9	0.0578622	0.757625	Other
ENSG00000016082	ISL1	protein_coding	P61371	-0.479178	0.167113	Other
ENSG00000016391	CHDH	protein_coding	Q8NE62	0.130566	0.669332	Other
ENSG00000016402	IL20RA	protein_coding	Q9UHF4	NA	NA	Other
ENSG00000016490	CLCA1	protein_coding	A8K7I4	NA	NA	Other
ENSG00000016602	CLCA4	protein_coding	Q14CN2	1.0073	NA	Other
ENSG00000016864	GLT8D1	protein_coding	Q68CQ7	0.193584	0.28483	Other
ENSG00000017260	ATP2C1	protein_coding	P98194	-0.212409	0.173538	Other
ENSG00000017427	IGF1	protein_coding	P05019	NA	NA	Other
ENSG00000017483	SLC38A5	protein_coding	Q8WUX1	0.599816	NA	Other
ENSG00000017797	RALBP1	protein_coding	Q15311	-0.261874	0.146054	Other
ENSG00000018189	RUFY3	protein_coding	Q7L099	-0.28549	0.203762	Other
ENSG00000018236	CNTN1	protein_coding	Q12860	-0.81025	0.00683668	Other
ENSG00000018280	SLC11A1	protein_coding	P49279	0.46039	NA	Other
ENSG00000018408	WWTR1	protein_coding	Q9GZV5	-0.534058	0.0423462	Other
ENSG00000018510	AGPS	protein_coding	O00116	-0.196147	0.247916	Other
ENSG00000018607	ZNF806	unprocessed_pseudogene	P0C7X5	NA	NA	Other
ENSG00000018610	CXorf56	protein_coding	Q9H5V9	0.0549294	0.786529	Other
ENSG00000018625	ATP1A2	protein_coding	P50993	-2.4418	NA	Other
ENSG00000018699	TTC27	protein_coding	Q6P3X3	0.167438	0.364606	Other
ENSG00000018869	ZNF582	protein_coding	Q96NG8	0.133143	0.79628	Other
ENSG00000019102	VSIG2	protein_coding	Q96IQ7	-0.881388	NA	Other
ENSG00000019144	PHLDB1	protein_coding	Q86UU1	-0.557525	0.0206891	Other
ENSG00000019169	MARCO	protein_coding	Q9UEW3	NA	NA	Other
ENSG00000019186	CYP24A1	protein_coding	Q07973	1.24124	NA	Other
ENSG00000019485	PRDM11	protein_coding	Q9NQV5	0.187445	0.652137	Other
ENSG00000019505	SYT13	protein_coding	Q7L8C5	-1.42167	NA	Other
ENSG00000019549	SNAI2	protein_coding	O43623	0.112653	0.762908	Other
ENSG00000019582	CD74	protein_coding	P04233	-0.151356	NA	Other
ENSG00000019991	HGF	protein_coding	P14210	-0.25046	NA	Other
ENSG00000019995	ZRANB1	protein_coding	Q9UGI0	-0.0177536	0.961233	Other
ENSG00000020129	NCDN	protein_coding	Q9UBB6	0.0990532	0.600046	Other
ENSG00000020181	ADGRA2	protein_coding	Q96PE1	-0.343988	0.293439	Other
ENSG00000020219	CCT8L1P	processed_pseudogene	A6NM43	0.469786	NA	Other
ENSG00000020256	ZFP64	protein_coding	Q9NPA5	0.0296071	0.908595	Other
ENSG00000020426	MNAT1	protein_coding	P51948	0.0310986	0.925477	Other
ENSG00000020577	SAMD4A	protein_coding	Q9UPU9	0.0621945	0.882122	Other
ENSG00000020633	RUNX3	protein_coding	Q13761	-0.297396	0.487706	Other
ENSG00000020922	MRE11	protein_coding	P49959	-0.275293	0.0642015	Other
ENSG00000021300	PLEKHB1	protein_coding	Q9UF11	-0.19196	0.610965	Other
ENSG00000021355	SERPINB1	protein_coding	P30740	-0.252976	0.397096	Other
ENSG00000021461	CYP3A43	protein_coding	Q9HB55	0.442673	NA	Other
ENSG00000021488	SLC7A9	protein_coding	P82251	0.826661	NA	Other
ENSG00000021574	SPAST	protein_coding	Q9UBP0	-0.102358	0.73535	Other
ENSG00000021645	NRXN3	protein_coding	Q9Y4C0	-1.11327	0.00196439	Other
ENSG00000021762	OSBPL5	protein_coding	Q9H0X9	-0.28945	0.472783	Other
ENSG00000021776	AQR	protein_coding	O60306	-0.168105	0.457817	Other
ENSG00000021826	CPS1	protein_coding	P31327	-0.24321	0.266238	Other
ENSG00000021852	C8B	protein_coding	P07358	NA	NA	Other
ENSG00000022267	FHL1	protein_coding	Q13642	0.10321	0.414257	Other
ENSG00000022277	RTFDC1	protein_coding	Q9BY42	0.167753	0.281209	Other
ENSG00000022355	GABRA1	protein_coding	P14867	NA	NA	Other
ENSG00000022556	NLRP2	protein_coding	Q9NX02	NA	NA	Other
ENSG00000022567	SLC45A4	protein_coding	Q5BKX6	0.270624	0.388998	Other
ENSG00000022840	RNF10	protein_coding	Q8N5U6	0.195687	0.0981224	Other
ENSG00000022976	ZNF839	protein_coding	A8K0R7	0.48008	0.0451162	Other
ENSG00000023041	ZDHHC6	protein_coding	Q9H6R6	-0.292419	0.0486852	Other
ENSG00000023171	GRAMD1B	protein_coding	Q3KR37	-0.578427	0.125925	Other
ENSG00000023191	RNH1	protein_coding	P13489	0.410954	0.509768	Other
ENSG00000023228	NDUFS1	protein_coding	P28331	-0.0235594	0.970217	Other
ENSG00000023287	RB1CC1	protein_coding	Q8TDY2	-0.154297	0.522361	Other
ENSG00000023318	ERP44	protein_coding	Q9BS26	0.719166	4.77263e-12	Common
ENSG00000023330	ALAS1	protein_coding	P13196	0.0627777	0.692097	Other
ENSG00000023445	BIRC3	protein_coding	Q13489	-2.31895	NA	Other
ENSG00000023516	AKAP11	protein_coding	Q9UKA4	-0.400216	0.0350712	Other
ENSG00000023572	GLRX2	protein_coding	Q9NS18	0.216307	0.372906	Other
ENSG00000023608	SNAPC1	protein_coding	Q16533	-0.0288831	0.945505	Other
ENSG00000023697	DERA	protein_coding	Q9Y315	-0.0512339	0.881107	Other
ENSG00000023734	STRAP	protein_coding	Q9Y3F4	0.07973	0.585756	Other
ENSG00000023839	ABCC2	protein_coding	Q92887	-0.208833	NA	Other
ENSG00000023892	DEF6	protein_coding	Q9H4E7	-0.666898	0.221098	Other
ENSG00000023902	PLEKHO1	protein_coding	Q53GL0	-0.0811277	0.774099	Other
ENSG00000023909	GCLM	protein_coding	P48507	0.200843	0.449985	Other
ENSG00000024048	UBR2	protein_coding	Q8IWV8	-0.128739	0.520164	Other
ENSG00000024422	EHD2	protein_coding	Q9NZN4	-0.272697	0.664508	Other
ENSG00000024526	DEPDC1	protein_coding	Q5TB30	-0.232192	0.158237	Other
ENSG00000024862	CCDC28A	protein_coding	Q8IWP9	0.31768	0.12282	Other
ENSG00000025039	RRAGD	protein_coding	Q9NQL2	-0.312	0.171503	Other
ENSG00000025156	HSF2	protein_coding	Q03933	-0.146139	0.390799	Other
ENSG00000025293	PHF20	protein_coding	Q9BVI0	-0.170077	0.316239	Other
ENSG00000025423	HSD17B6	protein_coding	O14756	0.282464	0.515491	Other
ENSG00000025434	NR1H3	protein_coding	Q13133	0.0694615	0.856557	Other
ENSG00000025708	TYMP	protein_coding	P19971	-0.292551	NA	Other
ENSG00000025770	NCAPH2	protein_coding	Q6IBW4	0.177761	0.236634	Other
ENSG00000025772	TOMM34	protein_coding	Q15785	-0.0283594	0.889284	Other
ENSG00000025796	SEC63	protein_coding	Q9UGP8	0.63675	1.40547e-09	Other
ENSG00000025800	KPNA6	protein_coding	O60684	-0.0991323	0.498899	Other
ENSG00000026025	VIM	protein_coding	P08670	-0.415268	0.000154909	Other
ENSG00000026036	RTEL1-TNFRSF6B	protein_coding	F6WH68	0.334	0.611775	Other
ENSG00000026103	FAS	protein_coding	P25445	-0.59189	0.135189	Other
ENSG00000026297	RNASET2	protein_coding	O00584	0.124534	0.792262	Other
ENSG00000026508	CD44	protein_coding	P16070	-1.6364	NA	Other
ENSG00000026559	KCNG1	protein_coding	Q9UIX4	0.158856	0.714603	Other
ENSG00000026652	AGPAT4	protein_coding	Q9NRZ5	-0.06998	0.782496	Other
ENSG00000026751	SLAMF7	protein_coding	Q9NQ25	-0.875617	NA	Other
ENSG00000026950	BTN3A1	protein_coding	O00481	-0.387001	0.418037	Other
ENSG00000027001	MIPEP	protein_coding	Q99797	-0.107092	0.707121	Other
ENSG00000027075	PRKCH	protein_coding	P24723	-1.17672	0.00535208	Other
ENSG00000027644	INSRR	protein_coding	P14616	0.186714	NA	Other
ENSG00000027697	IFNGR1	protein_coding	P15260	-0.0208211	0.934199	Other
ENSG00000027847	B4GALT7	protein_coding	Q9UBV7	0.877968	4.22317e-08	Stress-activated
ENSG00000027869	SH2D2A	protein_coding	Q9NP31	0.774251	0.133367	Other
ENSG00000028116	VRK2	protein_coding	Q86Y07	0.104675	0.7801	Other
ENSG00000028137	TNFRSF1B	protein_coding	P20333	-1.00018	NA	Other
ENSG00000028203	VEZT	protein_coding	Q9HBM0	-0.0435728	0.842037	Other
ENSG00000028277	POU2F2	protein_coding	P09086	0.28668	NA	Other
ENSG00000028310	BRD9	protein_coding	Q9H8M2	0.136572	0.432844	Other
ENSG00000028528	SNX1	protein_coding	Q13596	0.00897256	0.968437	Other
ENSG00000028839	TBPL1	protein_coding	P62380	0.0141192	0.964403	Other
ENSG00000029153	ARNTL2	protein_coding	Q8WYA1	-0.208363	0.432621	Other
ENSG00000029363	BCLAF1	protein_coding	Q9NYF8	-0.0940861	0.68221	Other
ENSG00000029364	SLC39A9	protein_coding	Q9NUM3	0.117957	0.487318	Stress-activated
ENSG00000029534	ANK1	protein_coding	P16157	-0.607904	0.12841	Other
ENSG00000029559	IBSP	protein_coding	P21815	NA	NA	Other
ENSG00000029639	TFB1M	protein_coding	Q8WVM0	-0.0167296	0.960385	Other
ENSG00000029725	RABEP1	protein_coding	Q15276	-0.243755	0.0677644	Other
ENSG00000029993	HMGB3	protein_coding	O15347	0.00439547	0.983281	Other
ENSG00000030066	NUP160	protein_coding	Q12769	-0.174272	0.227441	Other
ENSG00000030110	BAK1	protein_coding	Q16611	0.146666	0.491703	Other
ENSG00000030304	MUSK	protein_coding	O15146	-1.76818	NA	Other
ENSG00000030419	IKZF2	protein_coding	Q9UKS7	0.0381617	NA	Other
ENSG00000030582	GRN	protein_coding	P28799	-0.0826527	0.667455	Other
ENSG00000031003	FAM13B	protein_coding	Q9NYF5	-0.159357	0.519037	Other
ENSG00000031081	ARHGAP31	protein_coding	Q2M1Z3	0.0969812	0.878866	Other
ENSG00000031691	CENPQ	protein_coding	Q7L2Z9	-0.282449	0.286708	Other
ENSG00000031698	SARS	protein_coding	P49591	0.699849	9.73818e-22	Other
ENSG00000031823	RANBP3	protein_coding	Q9H6Z4	0.128586	0.402403	Other
ENSG00000032219	ARID4A	protein_coding	P29374	-0.286735	0.192181	Other
ENSG00000032389	TSSC1	protein_coding	#N/A	0.332038	0.0646622	Other
ENSG00000032444	PNPLA6	protein_coding	Q8IY17	0.114578	0.681444	Other
ENSG00000032742	IFT88	protein_coding	Q13099	-0.461054	0.193643	Other
ENSG00000033011	ALG1	protein_coding	Q9BT22	0.156049	0.515491	Other
ENSG00000033030	ZCCHC8	protein_coding	Q6NZY4	0.22367	0.10312	Other
ENSG00000033050	ABCF2	protein_coding	Q9UG63	0.181818	0.0791444	Other
ENSG00000033100	CHPF2	protein_coding	Q9P2E5	0.549334	1.55184e-05	Other
ENSG00000033122	LRRC7	protein_coding	Q96NW7	-0.00783408	NA	Other
ENSG00000033170	FUT8	protein_coding	Q9BYC5	-0.219872	0.432989	Other
ENSG00000033178	UBA6	protein_coding	A0AVT1	-0.148034	0.536537	Other
ENSG00000033327	GAB2	protein_coding	Q9UQC2	0.164913	0.654076	Other
ENSG00000033627	ATP6V0A1	protein_coding	Q93050	0.345209	0.00378372	Other
ENSG00000033800	PIAS1	protein_coding	O75925	-0.375446	0.0243962	Other
ENSG00000033867	SLC4A7	protein_coding	Q9Y6M7	-0.464725	0.048426	Other
ENSG00000034053	APBA2	protein_coding	Q99767	-0.178676	NA	Other
ENSG00000034152	MAP2K3	protein_coding	P46734	-0.0387162	0.909698	Other
ENSG00000034239	EFCAB1	protein_coding	Q9HAE3	0.0464942	NA	Other
ENSG00000034510	TMSB10	protein_coding	P63313	-0.158641	0.317661	Other
ENSG00000034533	ASTE1	protein_coding	Q2TB18	-0.119985	0.735706	Other
ENSG00000034677	RNF19A	protein_coding	Q9NV58	-0.180333	0.55856	Other
ENSG00000034693	PEX3	protein_coding	P56589	-0.0681695	0.828175	Other
ENSG00000034713	GABARAPL2	protein_coding	P60520	-0.116858	0.487134	Other
ENSG00000034971	MYOC	protein_coding	Q99972	NA	NA	Other
ENSG00000035115	SH3YL1	protein_coding	Q96HL8	0.0324217	0.950997	Other
ENSG00000035141	FAM136A	protein_coding	Q96C01	-0.143295	0.354449	Other
ENSG00000035403	VCL	protein_coding	P18206	-0.210008	0.192181	Other
ENSG00000035499	DEPDC1B	protein_coding	Q8WUY9	-0.0230598	0.947798	Other
ENSG00000035664	DAPK2	protein_coding	Q9UIK4	0.0659804	NA	Other
ENSG00000035681	NSMAF	protein_coding	Q92636	0.0934491	0.746625	Other
ENSG00000035687	ADSS	protein_coding	P30520	-0.267124	0.1083	Other
ENSG00000035720	STAP1	protein_coding	Q9ULZ2	-1.45311	NA	Other
ENSG00000035862	TIMP2	protein_coding	P16035	-1.16166	0.00010255	Other
ENSG00000035928	RFC1	protein_coding	P35251	0.152707	0.295664	Other
ENSG00000036054	TBC1D23	protein_coding	Q9NUY8	0.00533246	0.98649	Other
ENSG00000036257	CUL3	protein_coding	Q13618	-0.121243	0.514834	Other
ENSG00000036448	MYOM2	protein_coding	P54296	-0.544571	NA	Other
ENSG00000036473	OTC	protein_coding	P00480	-0.875617	NA	Other
ENSG00000036530	CYP46A1	protein_coding	Q9Y6A2	-0.44835	NA	Other
ENSG00000036549	ZZZ3	protein_coding	Q8IYH5	-0.0631895	0.781879	Other
ENSG00000036565	SLC18A1	protein_coding	P54219	NA	NA	Other
ENSG00000036672	USP2	protein_coding	O75604	0.0995526	0.801683	Other
ENSG00000036828	CASR.1	protein_coding	#N/A	NA	NA	Other
ENSG00000037042	TUBG2	protein_coding	Q9NRH3	0.159923	0.60734	Other
ENSG00000037241	RPL26L1	protein_coding	Q9UNX3	0.0715036	0.685994	Other
ENSG00000037280	FLT4	protein_coding	P35916	-0.13788	0.537365	Other
ENSG00000037474	NSUN2	protein_coding	Q08J23	0.0355613	0.82242	Other
ENSG00000037637	FBXO42	protein_coding	Q6P3S6	0.0450049	0.842537	Other
ENSG00000037749	MFAP3	protein_coding	P55082	-0.308506	0.385289	Other
ENSG00000037757	MRI1	protein_coding	Q9BV20	0.0149004	0.958893	Other
ENSG00000037897	METTL1	protein_coding	Q9UBP6	0.309603	0.171453	Other
ENSG00000037965	HOXC8	protein_coding	P31273	-0.817704	0.00835611	Other
ENSG00000038002	AGA	protein_coding	P20933	0.41677	0.0707097	Other
ENSG00000038210	PI4K2B	protein_coding	Q8TCG2	0.139987	0.658424	Other
ENSG00000038219	BOD1L1	protein_coding	Q8NFC6	0.0913001	0.644831	Other
ENSG00000038274	MAT2B	protein_coding	Q9NZL9	-0.0835142	0.697147	Other
ENSG00000038295	TLL1	protein_coding	O43897	0.0349107	0.970018	Other
ENSG00000038358	EDC4	protein_coding	Q6P2E9	0.137787	0.324775	Other
ENSG00000038382	TRIO	protein_coding	O75962	-0.156756	0.283984	Other
ENSG00000038427	VCAN	protein_coding	P13611	-1.34168	1.61901e-13	Basal-specific
ENSG00000038532	CLEC16A	protein_coding	Q2KHT3	0.291216	0.0995254	Other
ENSG00000038945	MSR1	protein_coding	P21757	NA	NA	Other
ENSG00000039068	CDH1	protein_coding	P12830	-0.735413	NA	Basal-specific
ENSG00000039123	SKIV2L2	protein_coding	#N/A	0.0196842	0.925449	Other
ENSG00000039139	DNAH5	protein_coding	Q8TE73	0.0224906	NA	Other
ENSG00000039319	ZFYVE16	protein_coding	Q7Z3T8	-0.22135	0.300229	Other
ENSG00000039523	FAM65A	protein_coding	#N/A	0.0404507	NA	Other
ENSG00000039537	C6	protein_coding	P13671	NA	NA	Other
ENSG00000039560	RAI14	protein_coding	Q9P0K7	-0.0557286	0.82905	Other
ENSG00000039600	SOX30	protein_coding	O94993	-0.213819	NA	Other
ENSG00000039650	PNKP	protein_coding	Q96T60	0.0576011	0.827061	Other
ENSG00000039987	BEST2	protein_coding	Q8NFU1	0.514041	NA	Other
ENSG00000040199	PHLPP2	protein_coding	Q6ZVD8	0.0277659	0.932314	Other
ENSG00000040275	SPDL1	protein_coding	Q96EA4	-0.071311	0.730317	Other
ENSG00000040341	STAU2	protein_coding	Q9NUL3	-0.626257	0.00162707	Other
ENSG00000040487	PQLC2	protein_coding	Q6ZP29	0.418678	0.0156602	Other
ENSG00000040531	CTNS	protein_coding	O60931	0.42403	0.01965	Other
ENSG00000040608	RTN4R	protein_coding	Q9BZR6	-0.686363	0.13293	Other
ENSG00000040633	PHF23	protein_coding	Q9BUL5	0.105039	0.54109	Other
ENSG00000040731	CDH10	protein_coding	Q9Y6N8	-1.44111	NA	Other
ENSG00000040933	INPP4A	protein_coding	Q96PE3	-0.0979006	0.617799	Other
ENSG00000041353	RAB27B	protein_coding	O00194	-0.887875	NA	Other
ENSG00000041357	PSMA4	protein_coding	P25789	-0.171093	0.135079	Other
ENSG00000041515	MYO16	protein_coding	Q9Y6X6	NA	NA	Other
ENSG00000041802	LSG1	protein_coding	Q9H089	0.0200673	0.938146	Other
ENSG00000041880	PARP3	protein_coding	Q9Y6F1	0.4232	0.0727772	Other
ENSG00000041982	TNC	protein_coding	P24821	-0.0662508	0.927673	Basal-specific
ENSG00000041988	THAP3	protein_coding	Q8WTV1	0.108081	0.699375	Other
ENSG00000042062	FAM65C	protein_coding	#N/A	-0.424706	NA	Other
ENSG00000042088	TDP1	protein_coding	Q9NUW8	-0.0235119	0.932597	Other
ENSG00000042286	AIFM2	protein_coding	Q9BRQ8	0.378479	0.362128	Other
ENSG00000042304	C2orf83	protein_coding	Q53S99	1.55059	NA	Other
ENSG00000042317	SPATA7	protein_coding	Q9P0W8	-0.10909	0.825228	Other
ENSG00000042429	MED17	protein_coding	A0A1W2PRB8	-0.0731832	0.753221	Other
ENSG00000042445	RETSAT	protein_coding	Q6NUM9	0.356101	0.0241302	Other
ENSG00000042493	CAPG	protein_coding	P40121	0.659811	0.0364667	Other
ENSG00000042753	AP2S1	protein_coding	P53680	0.171372	0.290737	Other
ENSG00000042781	USH2A	protein_coding	O75445	-1.39015	NA	Other
ENSG00000042813	ZPBP	protein_coding	Q9BS86	NA	NA	Other
ENSG00000042832	TG	protein_coding	P01266	1.11251	NA	Other
ENSG00000042980	ADAM28	protein_coding	Q9UKQ2	NA	NA	Other
ENSG00000043039	BARX2	protein_coding	Q9UMQ3	-0.0324164	0.957439	Other
ENSG00000043093	DCUN1D1	protein_coding	Q96GG9	-0.562296	0.00854796	Other
ENSG00000043143	JADE2	protein_coding	Q9NQC1	-0.816937	0.024692	Other
ENSG00000043355	ZIC2	protein_coding	O95409	-0.225203	0.0880396	Other
ENSG00000043462	LCP2	protein_coding	Q13094	-0.875617	NA	Other
ENSG00000043514	TRIT1	protein_coding	Q9H3H1	-0.169427	0.403505	Other
ENSG00000043591	ADRB1	protein_coding	P08588	-0.727597	NA	Other
ENSG00000044012	GUCA2B	protein_coding	Q16661	NA	NA	Other
ENSG00000044090	CUL7	protein_coding	Q14999	0.328538	0.0494476	Other
ENSG00000044115	CTNNA1	protein_coding	P35221	0.114998	0.336565	Other
ENSG00000044446	PHKA2	protein_coding	P46019	-0.0595993	0.804928	Other
ENSG00000044459	CNTLN	protein_coding	Q9NXG0	-0.0399508	0.923013	Other
ENSG00000044524	EPHA3	protein_coding	P29320	-0.422969	0.181326	Other
ENSG00000044574	HSPA5	protein_coding	P11021	2.94118	0	Common
ENSG00000046604	DSG2	protein_coding	Q14126	-0.214372	0.163656	Basal-specific
ENSG00000046647	GEMIN8	protein_coding	Q9NWZ8	0.394408	0.157384	Other
ENSG00000046651	OFD1	protein_coding	O75665	-0.0449357	0.852331	Other
ENSG00000046653	GPM6B	protein_coding	Q13491	-0.418171	0.115308	Other
ENSG00000046774	MAGEC2	protein_coding	Q9UBF1	-0.661003	NA	Other
ENSG00000046889	PREX2	protein_coding	Q70Z35	-0.765027	0.235414	Other
ENSG00000047056	WDR37	protein_coding	Q9Y2I8	0.0273765	0.918114	Other
ENSG00000047188	YTHDC2	protein_coding	Q9H6S0	-0.332287	0.0960696	Other
ENSG00000047230	CTPS2	protein_coding	Q9NRF8	-0.1439	0.491774	Other
ENSG00000047249	ATP6V1H	protein_coding	Q9UI12	0.135753	0.466693	Other
ENSG00000047315	POLR2B	protein_coding	P30876	-0.182708	0.172509	Other
ENSG00000047346	FAM214A	protein_coding	Q32MH5	-0.127342	0.73514	Other
ENSG00000047365	ARAP2	protein_coding	Q8WZ64	-0.505287	0.188831	Other
ENSG00000047410	TPR	protein_coding	P12270	-0.163694	0.278712	Other
ENSG00000047457	CP	protein_coding	P00450	-0.281846	NA	Other
ENSG00000047578	KIAA0556	protein_coding	O60303	0.254893	0.292854	Other
ENSG00000047579	DTNBP1	protein_coding	Q96EV8	0.171169	0.448989	Other
ENSG00000047597	XK	protein_coding	P51811	0.584346	0.179696	Other
ENSG00000047617	ANO2	protein_coding	Q9NQ90	1.13926	NA	Other
ENSG00000047621	C12orf4	protein_coding	Q9NQ89	0.074517	0.745433	Other
ENSG00000047634	SCML1	protein_coding	Q9UN30	-0.241575	0.13293	Other
ENSG00000047644	WWC3	protein_coding	Q9ULE0	2.2111	NA	Other
ENSG00000047648	ARHGAP6	protein_coding	O43182	1.36083	NA	Other
ENSG00000047662	FAM184B	protein_coding	#N/A	0.00834821	NA	Other
ENSG00000047849	MAP4	protein_coding	P27816	0.170735	0.157627	Other
ENSG00000047932	GOPC	protein_coding	Q9HD26	-0.00421624	0.98702	Other
ENSG00000047936	ROS1	protein_coding	P08922	-2.76522	NA	Other
ENSG00000048028	USP28	protein_coding	Q96RU2	-0.35921	0.019727	Other
ENSG00000048052	HDAC9	protein_coding	Q9UKV0	-0.959741	NA	Other
ENSG00000048140	TSPAN17	protein_coding	Q96FV3	0.101741	0.658679	Other
ENSG00000048162	NOP16	protein_coding	Q9Y3C1	0.141474	0.497524	Other
ENSG00000048342	CC2D2A	protein_coding	Q9P2K1	-0.382443	0.162912	Other
ENSG00000048392	RRM2B	protein_coding	Q7LG56	-0.529355	0.00133044	Other
ENSG00000048405	ZNF800	protein_coding	Q2TB10	0.0137006	0.971165	Other
ENSG00000048462	TNFRSF17	protein_coding	Q02223	2.2301	NA	Other
ENSG00000048471	SNX29	protein_coding	Q8TEQ0	0.161691	0.563111	Other
ENSG00000048540	LMO3	protein_coding	Q8TAP4	0.0455276	NA	Other
ENSG00000048544	MRPS10	protein_coding	P82664	0.0905391	0.69183	Other
ENSG00000048545	GUCA1A	protein_coding	P43080	NA	NA	Other
ENSG00000048649	RSF1	protein_coding	Q96T23	-0.230135	0.18489	Other
ENSG00000048707	VPS13D	protein_coding	Q5THJ4	-0.0631497	0.795079	Other
ENSG00000048740	CELF2	protein_coding	O95319	-0.221514	0.399144	Other
ENSG00000048828	FAM120A	protein_coding	Q9NZB2	-0.0285105	0.883907	Other
ENSG00000048991	R3HDM1	protein_coding	Q15032	-0.0699205	0.720439	Other
ENSG00000049089	COL9A2	protein_coding	Q14055	-0.15126	NA	Other
ENSG00000049130	KITLG	protein_coding	P21583	-0.412412	0.183665	Other
ENSG00000049167	ERCC8	protein_coding	Q13216	0.227917	0.509468	Other
ENSG00000049192	ADAMTS6	protein_coding	Q9UKP5	-0.743672	NA	Other
ENSG00000049239	H6PD	protein_coding	O95479	0.236564	0.317841	Other
ENSG00000049245	VAMP3	protein_coding	Q15836	-0.284092	0.0367956	Other
ENSG00000049246	PER3	protein_coding	P56645	-0.948036	0.181326	Other
ENSG00000049247	UTS2	protein_coding	O95399	0.154373	NA	Other
ENSG00000049249	TNFRSF9	protein_coding	Q07011	-0.234524	NA	Other
ENSG00000049283	EPN3	protein_coding	Q9H201	-0.920244	NA	Other
ENSG00000049323	LTBP1	protein_coding	Q14766	-0.252146	0.313759	Common
ENSG00000049449	RCN1	protein_coding	Q15293	0.55714	9.59738e-10	Basal-specific
ENSG00000049540	ELN	protein_coding	P15502	-1.13331	NA	Other
ENSG00000049541	RFC2	protein_coding	P35250	0.0728454	0.675305	Other
ENSG00000049618	ARID1B	protein_coding	Q8NFD5	-0.104459	0.636412	Other
ENSG00000049656	CLPTM1L	protein_coding	Q96KA5	0.60631	0.00498568	Other
ENSG00000049759	NEDD4L	protein_coding	Q96PU5	-0.326041	0.187389	Other
ENSG00000049768	FOXP3	protein_coding	Q9BZS1	-0.395369	NA	Other
ENSG00000049769	PPP1R3F	protein_coding	Q6ZSY5	0.38233	0.357414	Other
ENSG00000049860	HEXB	protein_coding	P07686	-0.06284	0.737353	Other
ENSG00000049883	PTCD2	protein_coding	Q8WV60	-0.213633	0.428316	Other
ENSG00000050030	KIAA2022	protein_coding	#N/A	-0.325092	NA	Other
ENSG00000050130	JKAMP	protein_coding	Q9P055	-0.252957	0.285903	Other
ENSG00000050165	DKK3	protein_coding	Q9UBP4	-1.57134	NA	Other
ENSG00000050327	ARHGEF5	protein_coding	Q12774	NA	NA	Other
ENSG00000050344	NFE2L3	protein_coding	Q9Y4A8	-0.233923	0.355923	Other
ENSG00000050393	MCUR1	protein_coding	Q96AQ8	0.564588	3.63526e-05	Other
ENSG00000050405	LIMA1	protein_coding	Q9UHB6	0.0856976	0.681824	Other
ENSG00000050426	LETMD1	protein_coding	Q6P1Q0	0.00746816	0.975744	Other
ENSG00000050438	SLC4A8	protein_coding	Q2Y0W8	-0.35379	0.659911	Other
ENSG00000050555	LAMC3	protein_coding	Q9Y6N6	-0.0523157	0.942691	Other
ENSG00000050628	PTGER3	protein_coding	P43115	-1.70961	NA	Other
ENSG00000050730	TNIP3	protein_coding	Q96KP6	0.896943	NA	Other
ENSG00000050748	MAPK9	protein_coding	P45984	-0.087037	0.626487	Other
ENSG00000050767	COL23A1	protein_coding	Q86Y22	-1.176	NA	Other
ENSG00000050820	BCAR1	protein_coding	P56945	0.253971	0.196363	Other
ENSG00000051009	FAM160A2	protein_coding	Q8N612	0.497799	0.00910192	Other
ENSG00000051108	HERPUD1	protein_coding	Q15011	2.7196	5.71746e-223	Other
ENSG00000051128	HOMER3	protein_coding	Q9NSC5	-0.21775	NA	Other
ENSG00000051180	RAD51	protein_coding	Q06609	0.28619	0.125168	Other
ENSG00000051341	POLQ	protein_coding	O75417	-0.330814	0.0353268	Other
ENSG00000051382	PIK3CB	protein_coding	P42338	-0.154457	0.569613	Other
ENSG00000051523	CYBA	protein_coding	P13498	0.131201	0.550248	Other
ENSG00000051596	THOC3	protein_coding	Q96J01	0.131575	0.350358	Other
ENSG00000051620	HEBP2	protein_coding	Q9Y5Z4	-0.0572149	0.788291	Other
ENSG00000051825	MPHOSPH9	protein_coding	Q99550	-0.172372	0.336045	Other
ENSG00000052126	PLEKHA5	protein_coding	Q9HAU0	-0.348235	0.167194	Other
ENSG00000052344	PRSS8	protein_coding	Q16651	-0.552529	NA	Other
ENSG00000052723	SIKE1	protein_coding	Q9BRV8	-0.0022024	0.994411	Other
ENSG00000052749	RRP12	protein_coding	Q5JTH9	0.633988	3.38819e-11	Common
ENSG00000052795	FNIP2	protein_coding	Q9P278	-0.564304	0.00323643	Other
ENSG00000052802	MSMO1	protein_coding	Q15800	-0.440888	0.0147688	Other
ENSG00000052841	TTC17	protein_coding	Q96AE7	0.147868	0.378148	Other
ENSG00000052850	ALX4	protein_coding	Q9H161	0.108943	0.7853	Other
ENSG00000053108	FSTL4	protein_coding	Q6MZW2	-0.390012	NA	Other
ENSG00000053254	FOXN3	protein_coding	O00409	-0.140157	0.63734	Other
ENSG00000053328	METTL24	protein_coding	Q5JXM2	0.829929	NA	Other
ENSG00000053371	AKR7A2	protein_coding	O43488	0.339331	0.0294583	Other
ENSG00000053372	MRTO4	protein_coding	Q9UKD2	0.138221	0.285903	Other
ENSG00000053438	NNAT	protein_coding	Q16517	0.154333	0.863002	Other
ENSG00000053501	USE1	protein_coding	Q9NZ43	0.223045	0.304231	Other
ENSG00000053524	MCF2L2	protein_coding	Q86YR7	0.735517	NA	Other
ENSG00000053702	NRIP2	protein_coding	Q9BQI9	0.559898	0.391786	Other
ENSG00000053747	LAMA3	protein_coding	Q16787	-0.286511	0.0786398	Other
ENSG00000053770	AP5M1	protein_coding	Q9H0R1	-0.32698	0.111448	Other
ENSG00000053900	ANAPC4	protein_coding	Q9UJX5	-0.235341	0.325209	Other
ENSG00000053918	KCNQ1	protein_coding	P51787	0.200515	NA	Other
ENSG00000054116	TRAPPC3	protein_coding	O43617	0.0332806	0.879601	Other
ENSG00000054118	THRAP3	protein_coding	Q9Y2W1	-0.0771988	0.557163	Other
ENSG00000054148	PHPT1	protein_coding	Q9NRX4	0.45239	0.00403561	Other
ENSG00000054179	ENTPD2	protein_coding	Q9Y5L3	-0.641237	NA	Other
ENSG00000054219	LY75	protein_coding	O60449	-2.21784	NA	Other
ENSG00000054267	ARID4B	protein_coding	Q4LE39	-0.149579	0.393643	Other
ENSG00000054277	OPN3	protein_coding	Q9H1Y3	-1.10496	NA	Other
ENSG00000054282	SDCCAG8	protein_coding	Q86SQ7	0.718213	0.171456	Other
ENSG00000054356	PTPRN	protein_coding	Q16849	-0.875617	NA	Other
ENSG00000054392	HHAT	protein_coding	Q5VTY9	-0.940763	NA	Other
ENSG00000054523	KIF1B	protein_coding	O60333	-0.25853	0.0532016	Other
ENSG00000054598	FOXC1	protein_coding	Q12948	-0.0903178	0.561173	Other
ENSG00000054611	TBC1D22A	protein_coding	Q8WUA7	0.265702	0.326851	Other
ENSG00000054654	SYNE2	protein_coding	Q8WXH0	-0.468292	0.00527478	Other
ENSG00000054690	PLEKHH1	protein_coding	Q9ULM0	-0.445219	0.0252698	Other
ENSG00000054793	ATP9A	protein_coding	O75110	-0.138971	0.541829	Other
ENSG00000054796	SPO11	protein_coding	Q9Y5K1	1.12607	NA	Other
ENSG00000054803	CBLN4	protein_coding	Q9NTU7	1.0073	NA	Other
ENSG00000054938	CHRDL2	protein_coding	Q6WN34	-0.119367	NA	Other
ENSG00000054965	FAM168A	protein_coding	Q92567	-0.331756	0.0170605	Other
ENSG00000054967	RELT	protein_coding	Q969Z4	0.154836	0.586664	Other
ENSG00000054983	GALC	protein_coding	P54803	0.0118553	0.989954	Other
ENSG00000055044	NOP58	protein_coding	Q9Y2X3	0.0394203	0.821714	Other
ENSG00000055070	SZRD1	protein_coding	#N/A	-0.0979799	0.571453	Other
ENSG00000055118	KCNH2	protein_coding	Q12809	-0.316121	0.57712	Other
ENSG00000055130	CUL1	protein_coding	Q13616	0.0996646	0.470283	Other
ENSG00000055147	FAM114A2	protein_coding	Q9NRY5	0.0875713	0.770572	Other
ENSG00000055163	CYFIP2	protein_coding	Q96F07	-0.1669	0.253654	Other
ENSG00000055208	TAB2	protein_coding	Q9NYJ8	-0.17008	0.250047	Other
ENSG00000055211	GINM1	protein_coding	Q9NU53	0.0106793	0.97816	Other
ENSG00000055332	EIF2AK2	protein_coding	P19525	-0.284453	0.0954181	Other
ENSG00000055483	USP36	protein_coding	Q9P275	0.355207	0.000268677	Other
ENSG00000055609	KMT2C	protein_coding	Q8NEZ4	-0.298975	0.0640944	Other
ENSG00000055732	MCOLN3	protein_coding	Q8TDD5	-0.474436	0.0272665	Other
ENSG00000055813	CCDC85A	protein_coding	#N/A	-0.875617	NA	Other
ENSG00000055917	PUM2	protein_coding	Q8TB72	-0.195778	0.279519	Other
ENSG00000055950	MRPL43	protein_coding	Q8N983	0.0360112	0.880656	Other
ENSG00000055955	ITIH4	protein_coding	Q14624	2.09009	NA	Other
ENSG00000055957	ITIH1	protein_coding	P19827	0.323679	NA	Other
ENSG00000056050	HPF1	protein_coding	Q9NWY4	-0.0513897	0.859327	Other
ENSG00000056097	ZFR	protein_coding	Q96KR1	0.0662885	0.780791	Other
ENSG00000056277	ZNF280C	protein_coding	Q8ND82	-0.043165	0.897882	Other
ENSG00000056291	NPFFR2	protein_coding	Q9Y5X5	-1.34474	NA	Other
ENSG00000056487	PHF21B	protein_coding	Q96EK2	0.323331	0.166036	Other
ENSG00000056558	TRAF1	protein_coding	Q13077	-0.323644	0.625857	Other
ENSG00000056586	RC3H2	protein_coding	Q9HBD1	-0.234272	0.186868	Other
ENSG00000056736	IL17RB	protein_coding	Q9NRM6	-0.34407	0.227486	Other
ENSG00000056972	TRAF3IP2	protein_coding	O43734	-0.0937099	0.84386	Other
ENSG00000056998	GYG2	protein_coding	O15488	-0.645248	0.0106453	Other
ENSG00000057019	DCBLD2	protein_coding	Q96PD2	-0.28515	0.126682	Other
ENSG00000057149	SERPINB3	protein_coding	P29508	NA	NA	Other
ENSG00000057252	SOAT1	protein_coding	P35610	-0.195018	0.241264	Other
ENSG00000057294	PKP2	protein_coding	Q99959	-0.168877	0.61451	Other
ENSG00000057468	MSH4	protein_coding	O15457	-1.18624	NA	Other
ENSG00000057593	F7	protein_coding	P08709	NA	NA	Other
ENSG00000057608	GDI2	protein_coding	P50395	-0.0308939	0.84923	Other
ENSG00000057657	PRDM1	protein_coding	O75626	0.0155482	NA	Other
ENSG00000057663	ATG5	protein_coding	Q9H1Y0	0.127353	0.69029	Other
ENSG00000057704	TMCC3	protein_coding	Q9ULS5	-0.555744	0.283663	Other
ENSG00000057757	PITHD1	protein_coding	Q9GZP4	0.163674	0.305353	Other
ENSG00000057935	MTA3	protein_coding	Q9BTC8	-0.302093	0.0971161	Other
ENSG00000058056	USP13	protein_coding	Q92995	-0.211523	0.358947	Other
ENSG00000058063	ATP11B	protein_coding	Q9Y2G3	-0.24521	0.273377	Other
ENSG00000058085	LAMC2	protein_coding	Q13753	-0.0208213	0.98076	Other
ENSG00000058091	CDK14	protein_coding	O94921	-0.516207	0.108884	Other
ENSG00000058262	SEC61A1	protein_coding	P61619	1.43319	3.76704e-69	Common
ENSG00000058272	PPP1R12A	protein_coding	O14974	-0.346514	0.046836	Other
ENSG00000058335	RASGRF1	protein_coding	Q13972	0.493261	NA	Other
ENSG00000058404	CAMK2B	protein_coding	Q13554	-0.275879	0.536376	Other
ENSG00000058453	CROCC	protein_coding	Q5TZA2	0.179187	0.630644	Other
ENSG00000058600	POLR3E	protein_coding	Q9NVU0	0.275405	0.0112959	Other
ENSG00000058668	ATP2B4	protein_coding	P23634	-0.172349	0.488784	Other
ENSG00000058673	ZC3H11A	protein_coding	O75152	-0.0850255	0.615373	Other
ENSG00000058729	RIOK2	protein_coding	Q9BVS4	0.338834	0.0543372	Other
ENSG00000058799	YIPF1	protein_coding	Q9Y548	0.0495943	0.895275	Other
ENSG00000058804	NDC1	protein_coding	Q9BTX1	-0.171504	0.285903	Other
ENSG00000058866	DGKG	protein_coding	P49619	-1.84597	NA	Other
ENSG00000059122	FLYWCH1	protein_coding	Q4VC44	0.260106	0.164006	Other
ENSG00000059145	UNKL	protein_coding	Q9H9P5	0.0768754	0.791064	Other
ENSG00000059377	TBXAS1	protein_coding	P24557	0.019916	0.984654	Other
ENSG00000059378	PARP12	protein_coding	Q9H0J9	0.412504	NA	Other
ENSG00000059573	ALDH18A1	protein_coding	P54886	0.345349	9.07775e-05	Other
ENSG00000059588	TARBP1	protein_coding	Q13395	-0.232317	0.141138	Other
ENSG00000059691	GATB	protein_coding	O75879	0.196947	0.295664	Other
ENSG00000059728	MXD1	protein_coding	Q05195	0.213416	0.284163	Other
ENSG00000059758	CDK17	protein_coding	Q00537	-0.203601	0.44806	Other
ENSG00000059769	DNAJC25	protein_coding	Q9H1X3	0.505654	0.00730051	Other
ENSG00000059804	SLC2A3	protein_coding	P11169	-0.675268	0.057936	Other
ENSG00000059915	PSD	protein_coding	A5PKW4	0.252883	0.6711	Other
ENSG00000060069	CTDP1	protein_coding	Q9Y5B0	0.578386	0.0268665	Other
ENSG00000060138	YBX3	protein_coding	P16989	0.422112	2.82865e-07	Other
ENSG00000060140	STYK1	protein_coding	Q6J9G0	-0.229891	NA	Other
ENSG00000060237	WNK1	protein_coding	Q9H4A3	0.0192227	0.92771	Other
ENSG00000060303	RPS17P5	processed_pseudogene	#N/A	NA	NA	Other
ENSG00000060339	CCAR1	protein_coding	Q8IX12	-0.0135884	0.946305	Other
ENSG00000060491	OGFR	protein_coding	Q9NZT2	0.0345896	0.904092	Other
ENSG00000060558	GNA15	protein_coding	P30679	-0.401804	NA	Other
ENSG00000060566	CREB3L3	protein_coding	Q68CJ9	NA	NA	Other
ENSG00000060642	PIGV	protein_coding	Q9NUD9	0.207415	0.601628	Other
ENSG00000060656	PTPRU	protein_coding	Q92729	-0.284104	0.0786273	Other
ENSG00000060688	SNRNP40	protein_coding	Q96DI7	-0.0221558	0.90236	Other
ENSG00000060709	RIMBP2	protein_coding	O15034	0.157288	NA	Other
ENSG00000060718	COL11A1	protein_coding	P12107	-2.09183	NA	Other
ENSG00000060749	QSER1	protein_coding	#N/A	-0.310222	0.0620168	Other
ENSG00000060762	MPC1	protein_coding	Q9Y5U8	0.266616	0.0743942	Other
ENSG00000060971	ACAA1	protein_coding	P09110	0.0892666	0.717511	Other
ENSG00000060982	BCAT1	protein_coding	P54687	0.58227	0.000102132	Other
ENSG00000061273	HDAC7	protein_coding	Q8WUI4	-0.0836327	0.822716	Other
ENSG00000061337	LZTS1	protein_coding	Q9Y250	-0.791539	NA	Other
ENSG00000061455	PRDM6	protein_coding	Q9NQX0	-0.13233	0.708649	Other
ENSG00000061492	WNT8A	protein_coding	Q9H1J5	NA	NA	Other
ENSG00000061656	SPAG4	protein_coding	Q9NPE6	-0.192665	0.795821	Other
ENSG00000061676	NCKAP1	protein_coding	Q9Y2A7	-0.177428	0.358721	Other
ENSG00000061794	MRPS35	protein_coding	P82673	0.238336	0.0880396	Other
ENSG00000061918	GUCY1B3	protein_coding	#N/A	-0.687249	0.0221172	Other
ENSG00000061936	SFSWAP	protein_coding	Q12872	0.198898	0.12147	Other
ENSG00000061938	TNK2	protein_coding	Q07912	0.0530773	0.87333	Other
ENSG00000061987	MON2	protein_coding	Q7Z3U7	0.107601	0.632243	Other
ENSG00000062038	CDH3	protein_coding	P22223	-0.46263	NA	Other
ENSG00000062096	ARSF	protein_coding	P54793	1.0073	NA	Other
ENSG00000062194	GPBP1	protein_coding	Q86WP2	-0.220177	0.0728793	Other
ENSG00000062282	DGAT2	protein_coding	Q96PD7	-1.05999	0.129377	Other
ENSG00000062370	ZNF112	protein_coding	Q9UJU3	-0.137924	0.817746	Other
ENSG00000062485	CS	protein_coding	O75390	-0.0856632	0.508178	Other
ENSG00000062524	LTK	protein_coding	P29376	0.381793	0.441487	Other
ENSG00000062582	MRPS24	protein_coding	Q96EL2	0.48966	NA	Other
ENSG00000062598	ELMO2	protein_coding	Q96JJ3	-0.0160018	0.958104	Other
ENSG00000062650	WAPL	protein_coding	Q7Z5K2	-0.149575	0.358892	Other
ENSG00000062716	VMP1	protein_coding	Q96GC9	0.0386612	0.865203	Other
ENSG00000062725	APPBP2	protein_coding	Q92624	-0.17182	0.452413	Other
ENSG00000062822	POLD1	protein_coding	P28340	0.214914	0.194174	Basal-specific
ENSG00000063015	SEZ6	protein_coding	Q53EL9	-1.62628	NA	Other
ENSG00000063046	EIF4B	protein_coding	P23588	-0.160471	0.0852704	Other
ENSG00000063127	SLC6A16	protein_coding	Q9GZN6	-0.506545	NA	Other
ENSG00000063169	GLTSCR1	protein_coding	#N/A	0.378412	0.0517551	Other
ENSG00000063176	SPHK2	protein_coding	Q9NRA0	0.159619	0.587573	Other
ENSG00000063177	RPL18	protein_coding	Q07020	0.280088	0.0160689	Other
ENSG00000063180	CA11	protein_coding	O75493	-0.367272	0.39247	Other
ENSG00000063241	ISOC2	protein_coding	Q96AB3	1.01497	1.74592e-15	Other
ENSG00000063244	U2AF2	protein_coding	P26368	0.242845	0.0302267	Other
ENSG00000063245	EPN1	protein_coding	Q9Y6I3	0.337306	0.0375705	Stress-activated
ENSG00000063322	MED29	protein_coding	Q9NX70	0.106701	0.525549	Other
ENSG00000063438	AHRR	protein_coding	A9YTQ3	0.274894	0.136352	Other
ENSG00000063515	GSC2	protein_coding	O15499	-0.875617	NA	Other
ENSG00000063587	ZNF275	protein_coding	Q9NSD4	0.166029	0.304231	Other
ENSG00000063601	MTMR1	protein_coding	Q13613	0.0825576	0.650468	Other
ENSG00000063660	GPC1	protein_coding	P35052	-0.622007	0.0111281	Other
ENSG00000063761	ADCK1	protein_coding	Q86TW2	0.382724	0.141057	Other
ENSG00000063854	HAGH	protein_coding	Q16775	0.4101	0.00690528	Other
ENSG00000063978	RNF4	protein_coding	P78317	0.0578762	0.762853	Other
ENSG00000064012	CASP8	protein_coding	Q14790	-0.123158	0.758313	Other
ENSG00000064042	LIMCH1	protein_coding	Q9UPQ0	-0.516306	0.273026	Other
ENSG00000064102	ASUN	protein_coding	#N/A	-0.0596261	0.770679	Other
ENSG00000064115	TM7SF3	protein_coding	Q9NS93	-0.164134	0.369471	Other
ENSG00000064195	DLX3	protein_coding	O60479	1.57401	NA	Other
ENSG00000064199	SPA17	protein_coding	Q15506	-0.447824	0.433955	Other
ENSG00000064201	TSPAN32	protein_coding	Q96QS1	0.0787015	NA	Other
ENSG00000064205	WISP2	protein_coding	O76076	-0.105309	NA	Other
ENSG00000064218	DMRT3	protein_coding	Q9NQL9	-0.8684	NA	Other
ENSG00000064225	ST3GAL6	protein_coding	Q9Y274	-0.30299	0.42966	Other
ENSG00000064270	ATP2C2	protein_coding	O75185	0.949704	NA	Other
ENSG00000064300	NGFR	protein_coding	P08138	-0.647923	NA	Other
ENSG00000064309	CDON	protein_coding	Q4KMG0	-0.338144	0.159871	Basal-specific
ENSG00000064313	TAF2	protein_coding	Q6P1X5	-0.119702	0.602558	Other
ENSG00000064393	HIPK2	protein_coding	Q9H2X6	0.0377085	0.862692	Other
ENSG00000064419	TNPO3	protein_coding	Q9Y5L0	-0.0256376	0.888552	Other
ENSG00000064489	BORCS8-MEF2B	protein_coding	H3BNR1	-1.99118	NA	Other
ENSG00000064490	RFXANK	protein_coding	O14593	0.297396	0.164956	Other
ENSG00000064545	TMEM161A	protein_coding	Q9NX61	0.291082	0.0412466	Common
ENSG00000064547	LPAR2	protein_coding	Q9HBW0	-0.959439	0.12529	Other
ENSG00000064601	CTSA	protein_coding	P10619	-0.00110402	0.997212	Common
ENSG00000064607	SUGP2	protein_coding	Q8IX01	-0.0449182	0.773426	Other
ENSG00000064651	SLC12A2	protein_coding	P55011	-0.0794526	0.76921	Other
ENSG00000064652	SNX24	protein_coding	Q9Y343	0.184819	0.641327	Other
ENSG00000064655	EYA2	protein_coding	O00167	-0.131002	0.770095	Other
ENSG00000064666	CNN2	protein_coding	Q99439	0.582414	0.00470075	Other
ENSG00000064687	ABCA7	protein_coding	Q8IZY2	0.161845	0.500036	Other
ENSG00000064692	SNCAIP	protein_coding	Q9Y6H5	-0.480263	NA	Other
ENSG00000064703	DDX20	protein_coding	Q9UHI6	-0.114621	0.55504	Other
ENSG00000064726	BTBD1	protein_coding	Q9H0C5	-0.0378097	0.872319	Other
ENSG00000064763	FAR2	protein_coding	Q96K12	-0.477411	0.0326075	Other
ENSG00000064787	BCAS1	protein_coding	O75363	-0.683861	NA	Other
ENSG00000064835	POU1F1	protein_coding	P28069	-0.278235	NA	Other
ENSG00000064886	CHI3L2	protein_coding	Q15782	1.12607	NA	Other
ENSG00000064932	SBNO2	protein_coding	Q9Y2G9	0.253715	0.675675	Other
ENSG00000064933	PMS1	protein_coding	P54277	-0.0805947	0.760536	Other
ENSG00000064961	HMG20B	protein_coding	Q9P0W2	0.184571	0.372078	Other
ENSG00000064989	CALCRL	protein_coding	Q16602	0.757522	NA	Other
ENSG00000064995	TAF11	protein_coding	Q15544	-0.252758	0.218247	Other
ENSG00000064999	ANKS1A	protein_coding	Q92625	0.098462	0.590525	Other
ENSG00000065000	AP3D1	protein_coding	O14617	0.767827	1.48494e-17	Other
ENSG00000065029	ZNF76	protein_coding	P36508	0.338373	0.0258122	Other
ENSG00000065054	SLC9A3R2	protein_coding	Q15599	-0.220122	0.388814	Other
ENSG00000065057	NTHL1	protein_coding	P78549	0.191345	0.448989	Other
ENSG00000065060	UHRF1BP1	protein_coding	Q6BDS2	0.328614	0.0375196	Other
ENSG00000065135	GNAI3	protein_coding	P08754	-0.126506	0.461596	Other
ENSG00000065150	IPO5	protein_coding	O00410	-0.0832996	0.523515	Other
ENSG00000065154	OAT	protein_coding	P04181	-0.163067	0.243506	Other
ENSG00000065183	WDR3	protein_coding	Q9UNX4	-0.225002	0.114294	Other
ENSG00000065243	PKN2	protein_coding	Q16513	-0.354281	0.402343	Other
ENSG00000065268	WDR18	protein_coding	Q9BV38	0.498619	0.00150077	Other
ENSG00000065308	TRAM2	protein_coding	Q15035	-0.130227	0.643143	Other
ENSG00000065320	NTN1	protein_coding	O95631	-0.44184	0.0367339	Basal-specific
ENSG00000065325	GLP2R	protein_coding	O95838	-0.875617	NA	Other
ENSG00000065328	MCM10	protein_coding	Q7L590	-0.211173	0.163459	Other
ENSG00000065357	DGKA	protein_coding	P23743	-0.449292	0.174051	Other
ENSG00000065361	ERBB3	protein_coding	P21860	-0.482616	0.266895	Other
ENSG00000065371	ROPN1	protein_coding	Q9HAT0	NA	NA	Other
ENSG00000065413	ANKRD44	protein_coding	Q8N8A2	-1.25734	NA	Other
ENSG00000065427	KARS	protein_coding	Q15046	0.147709	0.18654	Other
ENSG00000065457	ADAT1	protein_coding	Q9BUB4	0.0937301	0.739437	Other
ENSG00000065485	PDIA5	protein_coding	Q14554	1.25908	3.16622e-22	Basal-specific
ENSG00000065491	TBC1D22B	protein_coding	Q9NU19	0.310092	0.129516	Other
ENSG00000065518	NDUFB4	protein_coding	O95168	-0.161941	0.279318	Other
ENSG00000065526	SPEN	protein_coding	Q96T58	0.212467	0.0254178	Other
ENSG00000065534	MYLK	protein_coding	Q15746	-0.428376	0.489205	Other
ENSG00000065548	ZC3H15	protein_coding	Q8WU90	0.0493838	0.782496	Other
ENSG00000065559	MAP2K4	protein_coding	P45985	-0.266993	0.11978	Other
ENSG00000065600	TMEM206	protein_coding	Q9H813	0.229308	0.325647	Common
ENSG00000065609	SNAP91	protein_coding	O60641	0.0787572	0.91929	Other
ENSG00000065613	SLK	protein_coding	Q9H2G2	-0.181336	0.243837	Other
ENSG00000065615	CYB5R4	protein_coding	Q7L1T6	0.0936408	0.745219	Other
ENSG00000065618	COL17A1	protein_coding	Q9UMD9	0.0888819	NA	Other
ENSG00000065621	GSTO2	protein_coding	Q9H4Y5	0.0853247	0.925167	Other
ENSG00000065665	SEC61A2	protein_coding	Q9H9S3	0.00897064	0.977178	Other
ENSG00000065675	PRKCQ	protein_coding	Q04759	-0.00975521	0.989954	Other
ENSG00000065717	TLE2	protein_coding	Q04725	-0.262359	0.637146	Other
ENSG00000065802	ASB1	protein_coding	Q9Y576	0.0434903	0.865887	Other
ENSG00000065809	FAM107B	protein_coding	#N/A	0.0539645	0.861578	Other
ENSG00000065833	ME1	protein_coding	P48163	-0.0509717	0.888564	Other
ENSG00000065882	TBC1D1	protein_coding	Q86TI0	-0.390425	0.0945915	Other
ENSG00000065883	CDK13	protein_coding	Q14004	-0.0217163	0.932597	Other
ENSG00000065911	MTHFD2	protein_coding	P13995	0.948542	8.46591e-24	Other
ENSG00000065923	SLC9A7	protein_coding	Q96T83	-0.0729588	0.828637	Other
ENSG00000065970	FOXJ2	protein_coding	Q9P0K8	0.344693	0.153787	Other
ENSG00000065978	YBX1	protein_coding	P67809	0.233211	0.013077	Other
ENSG00000065989	PDE4A	protein_coding	P27815	-0.46209	0.206059	Other
ENSG00000066027	PPP2R5A	protein_coding	Q15172	-0.130123	0.56128	Other
ENSG00000066032	CTNNA2	protein_coding	P26232	1.0073	NA	Other
ENSG00000066044	ELAVL1	protein_coding	Q15717	0.0997096	0.49518	Other
ENSG00000066056	TIE1	protein_coding	P35590	0.100554	NA	Other
ENSG00000066084	DIP2B	protein_coding	Q9P265	-0.359666	0.0514501	Other
ENSG00000066117	SMARCD1	protein_coding	Q96GM5	0.0021758	0.991773	Other
ENSG00000066135	KDM4A	protein_coding	O75164	0.270644	0.029111	Other
ENSG00000066136	NFYC	protein_coding	Q13952	0.193422	0.212786	Other
ENSG00000066185	ZMYND12	protein_coding	Q9H0C1	0.550286	NA	Other
ENSG00000066230	SLC9A3	protein_coding	P48764	0.238278	NA	Other
ENSG00000066248	NGEF	protein_coding	Q8N5V2	-0.93827	0.0226767	Other
ENSG00000066279	ASPM	protein_coding	Q8IZT6	-0.482025	0.182472	Other
ENSG00000066294	CD84	protein_coding	Q9UIB8	NA	NA	Other
ENSG00000066322	ELOVL1	protein_coding	Q9BW60	-0.0392362	0.87333	Other
ENSG00000066336	SPI1	protein_coding	P17947	-1.09017	NA	Other
ENSG00000066379	ZNRD1	protein_coding	Q9P1U0	1.52432	NA	Other
ENSG00000066382	MPPED2	protein_coding	Q15777	-0.864055	NA	Other
ENSG00000066405	CLDN18	protein_coding	P56856	-0.629462	NA	Other
ENSG00000066422	ZBTB11	protein_coding	O95625	-0.282809	0.125872	Other
ENSG00000066427	ATXN3	protein_coding	P54252	-0.0175824	0.960153	Other
ENSG00000066455	GOLGA5	protein_coding	Q8TBA6	0.741277	1.44783e-07	Other
ENSG00000066468	FGFR2	protein_coding	P21802	-0.337942	0.0935677	Other
ENSG00000066557	LRRC40	protein_coding	Q9H9A6	-0.307054	0.105806	Other
ENSG00000066583	ISOC1	protein_coding	Q96CN7	-0.246892	0.119645	Other
ENSG00000066629	EML1	protein_coding	O00423	-0.285668	0.200237	Other
ENSG00000066651	TRMT11	protein_coding	Q7Z4G4	0.0705095	0.758429	Other
ENSG00000066654	THUMPD1	protein_coding	Q9NXG2	-0.286671	0.125433	Other
ENSG00000066697	MSANTD3	protein_coding	Q96H12	-0.238792	0.368577	Other
ENSG00000066735	KIF26A	protein_coding	Q9ULI4	0.317931	0.145845	Other
ENSG00000066739	ATG2B	protein_coding	Q96BY7	-0.0737974	0.787856	Other
ENSG00000066777	ARFGEF1	protein_coding	Q9Y6D6	0.0565931	0.835425	Other
ENSG00000066813	ACSM2B	protein_coding	Q68CK6	NA	NA	Other
ENSG00000066827	ZFAT	protein_coding	Q9P243	0.207033	0.471149	Other
ENSG00000066855	MTFR1	protein_coding	Q15390	0.705065	6.24694e-08	Other
ENSG00000066923	STAG3	protein_coding	Q9UJ98	-0.214813	NA	Other
ENSG00000066926	FECH	protein_coding	P22830	0.0562684	0.82242	Other
ENSG00000066933	MYO9A	protein_coding	B2RTY4	-0.0670314	0.803326	Other
ENSG00000067048	DDX3Y	protein_coding	O15523	NA	NA	Other
ENSG00000067057	PFKP	protein_coding	Q01813	-0.61319	0.000172751	Other
ENSG00000067064	IDI1	protein_coding	Q13907	-0.13569	0.432895	Other
ENSG00000067066	SP100	protein_coding	P23497	0.163243	NA	Other
ENSG00000067082	KLF6	protein_coding	Q99612	0.123121	0.483444	Other
ENSG00000067113	PLPP1	protein_coding	O14494	1.11224	0.000268677	Other
ENSG00000067141	NEO1	protein_coding	Q92859	-0.194395	0.229842	Common
ENSG00000067167	TRAM1	protein_coding	Q15629	0.870342	2.1441e-14	Other
ENSG00000067177	PHKA1	protein_coding	P46020	-0.0157639	0.957439	Other
ENSG00000067182	TNFRSF1A	protein_coding	P19438	0.465418	0.0146559	Other
ENSG00000067191	CACNB1	protein_coding	Q02641	-0.083287	0.884996	Other
ENSG00000067208	EVI5	protein_coding	O60447	-0.142087	0.630644	Other
ENSG00000067221	STOML1	protein_coding	Q9UBI4	0.697139	0.000755092	Other
ENSG00000067225	PKM	protein_coding	P14618	-0.112955	0.367968	Other
ENSG00000067248	DHX29	protein_coding	Q7Z478	0.166615	0.336688	Other
ENSG00000067334	DNTTIP2	protein_coding	Q5QJE6	-0.248625	0.0548075	Other
ENSG00000067365	METTL22	protein_coding	Q9BUU2	0.36657	0.0634329	Other
ENSG00000067369	TP53BP1	protein_coding	Q12888	-0.0507294	0.822716	Other
ENSG00000067445	TRO	protein_coding	Q12816	-0.00615066	0.983281	Other
ENSG00000067533	RRP15	protein_coding	Q9Y3B9	-0.0434443	0.85518	Other
ENSG00000067560	RHOA	protein_coding	P61586	-0.00101078	0.995194	Other
ENSG00000067596	DHX8	protein_coding	Q14562	0.0382016	0.843484	Other
ENSG00000067601	PMS2P4	transcribed_unprocessed_pseudogene	#N/A	0.336727	0.658405	Other
ENSG00000067606	PRKCZ	protein_coding	Q05513	0.433035	0.0344458	Other
ENSG00000067646	ZFY	protein_coding	P08048	NA	NA	Other
ENSG00000067704	IARS2	protein_coding	Q9NSE4	-0.140354	0.26771	Other
ENSG00000067715	SYT1	protein_coding	P21579	-0.1219	0.795915	Other
ENSG00000067798	NAV3	protein_coding	Q8IVL0	-0.372156	NA	Other
ENSG00000067829	IDH3G	protein_coding	P51553	0.308875	0.0575419	Other
ENSG00000067836	ROGDI	protein_coding	Q9GZN7	0.030191	0.950574	Other
ENSG00000067840	PDZD4	protein_coding	Q76G19	-0.238436	0.587573	Other
ENSG00000067842	ATP2B3	protein_coding	Q16720	-0.976804	NA	Other
ENSG00000067900	ROCK1	protein_coding	Q13464	-0.238656	0.269778	Other
ENSG00000067955	CBFB	protein_coding	Q13951	-0.423024	0.00513041	Other
ENSG00000067992	PDK3	protein_coding	Q15120	-0.325482	0.319209	Other
ENSG00000068001	HYAL2	protein_coding	Q12891	-0.203629	0.428177	Other
ENSG00000068024	HDAC4	protein_coding	P56524	0.0651951	0.845431	Other
ENSG00000068028	RASSF1	protein_coding	Q9NS23	0.402739	0.00091784	Other
ENSG00000068078	FGFR3	protein_coding	P22607	-0.308081	0.0710809	Other
ENSG00000068079	IFI35	protein_coding	P80217	0.267446	NA	Other
ENSG00000068097	HEATR6	protein_coding	Q6AI08	0.00454551	0.98649	Other
ENSG00000068120	COASY	protein_coding	Q13057	0.450768	0.00081703	Other
ENSG00000068137	PLEKHH3	protein_coding	Q7Z736	-0.167078	0.531584	Other
ENSG00000068305	MEF2A	protein_coding	Q02078	-0.160915	0.499754	Other
ENSG00000068308	OTUD5	protein_coding	Q96G74	0.23077	0.106926	Other
ENSG00000068323	TFE3	protein_coding	P19532	0.117717	0.506098	Other
ENSG00000068354	TBC1D25	protein_coding	Q3MII6	0.254357	0.390261	Other
ENSG00000068366	ACSL4	protein_coding	O60488	-0.508252	0.00695595	Other
ENSG00000068383	INPP5A	protein_coding	Q14642	0.107493	0.702227	Other
ENSG00000068394	GPKOW	protein_coding	Q92917	0.336431	0.0306956	Other
ENSG00000068400	GRIPAP1	protein_coding	Q4V328	0.169907	0.298556	Other
ENSG00000068438	FTSJ1	protein_coding	Q9UET6	0.875069	4.7116e-12	Other
ENSG00000068489	PRR11	protein_coding	Q96HE9	-0.170157	0.392778	Other
ENSG00000068615	REEP1	protein_coding	Q9H902	-0.328386	0.323053	Other
ENSG00000068650	ATP11A	protein_coding	P98196	-0.194002	0.415854	Other
ENSG00000068654	POLR1A	protein_coding	O95602	0.14438	0.236416	Other
ENSG00000068697	LAPTM4A	protein_coding	Q15012	0.0804376	0.615322	Other
ENSG00000068724	TTC7A	protein_coding	Q9ULT0	0.384456	0.154378	Other
ENSG00000068745	IP6K2	protein_coding	Q9UHH9	-0.181287	0.130612	Other
ENSG00000068781	STON1-GTF2A1L	protein_coding	Q53S48	NA	NA	Other
ENSG00000068784	SRBD1	protein_coding	Q8N5C6	0.269633	0.180588	Other
ENSG00000068796	KIF2A	protein_coding	O00139	-0.136145	0.457626	Other
ENSG00000068831	RASGRP2	protein_coding	Q7LDG7	-0.607579	NA	Other
ENSG00000068878	PSME4	protein_coding	Q14997	-0.0414949	0.827842	Other
ENSG00000068885	IFT80	protein_coding	Q9P2H3	-0.0986712	0.779889	Other
ENSG00000068903	SIRT2	protein_coding	Q8IXJ6	NA	NA	Other
ENSG00000068912	ERLEC1	protein_coding	Q96DZ1	1.01616	7.83525e-18	Other
ENSG00000068971	PPP2R5B	protein_coding	Q15173	0.203142	0.38478	Other
ENSG00000068976	PYGM	protein_coding	P11217	-0.0413374	0.94979	Other
ENSG00000068985	PAGE1	protein_coding	O75459	NA	NA	Other
ENSG00000069011	PITX1	protein_coding	P78337	0.430797	0.0203293	Other
ENSG00000069018	TRPC7	protein_coding	Q9HCX4	-0.0925653	NA	Other
ENSG00000069020	MAST4	protein_coding	O15021	-0.380742	0.247495	Other
ENSG00000069122	ADGRF5	protein_coding	Q8IZF2	1.70647	NA	Other
ENSG00000069188	SDK2	protein_coding	Q58EX2	-0.630323	0.00196439	Other
ENSG00000069206	ADAM7	protein_coding	Q9H2U9	NA	NA	Other
ENSG00000069248	NUP133	protein_coding	Q8WUM0	-0.0397657	0.823286	Other
ENSG00000069275	NUCKS1	protein_coding	Q9H1E3	-0.024483	0.884996	Other
ENSG00000069329	VPS35	protein_coding	Q96QK1	-0.0828124	0.65226	Other
ENSG00000069345	DNAJA2	protein_coding	O60884	-0.0706029	0.681257	Other
ENSG00000069399	BCL3	protein_coding	P20749	-0.536183	NA	Other
ENSG00000069424	KCNAB2	protein_coding	Q13303	-0.0419114	0.959225	Other
ENSG00000069431	ABCC9	protein_coding	O60706	-0.845862	NA	Other
ENSG00000069482	GAL	protein_coding	P22466	0.286102	0.0908261	Other
ENSG00000069493	CLEC2D	protein_coding	Q9UHP7	-0.225518	0.769342	Other
ENSG00000069509	FUNDC1	protein_coding	Q8IVP5	-0.100943	0.65825	Other
ENSG00000069535	MAOB	protein_coding	P27338	0.0173149	NA	Other
ENSG00000069667	RORA	protein_coding	P35398	-0.647918	0.0328744	Other
ENSG00000069696	DRD4	protein_coding	P21917	-3.3342	NA	Other
ENSG00000069702	TGFBR3	protein_coding	Q03167	-0.890542	0.000309099	Other
ENSG00000069712	KIAA1107	protein_coding	Q9UPP5	NA	NA	Other
ENSG00000069764	PLA2G10	protein_coding	O15496	NA	NA	Other
ENSG00000069812	HES2	protein_coding	Q9Y543	-0.448534	NA	Other
ENSG00000069849	ATP1B3	protein_coding	P54709	-0.11721	0.367671	Other
ENSG00000069869	NEDD4	protein_coding	P46934	0.0522626	0.904709	Other
ENSG00000069943	PIGB	protein_coding	Q92521	-0.0361168	0.958719	Other
ENSG00000069956	MAPK6	protein_coding	Q16659	0.126479	0.571822	Other
ENSG00000069966	GNB5	protein_coding	O14775	-0.220735	0.586061	Other
ENSG00000069974	RAB27A	protein_coding	P51159	-0.270555	0.602233	Other
ENSG00000069998	CECR5	protein_coding	Q9BXW7	0.218343	0.135176	Other
ENSG00000070010	UFD1L	protein_coding	#N/A	0.0911762	0.550251	Other
ENSG00000070018	LRP6	protein_coding	O75581	NA	NA	Other
ENSG00000070019	GUCY2C	protein_coding	P25092	0.237544	NA	Other
ENSG00000070031	SCT	protein_coding	P09683	-0.875617	NA	Other
ENSG00000070047	PHRF1	protein_coding	Q9P1Y6	-0.128895	NA	Other
ENSG00000070061	IKBKAP	protein_coding	#N/A	-0.0483676	0.768786	Other
ENSG00000070081	NUCB2	protein_coding	P80303	1.15848	7.92378e-28	Basal-specific
ENSG00000070087	PFN2	protein_coding	P35080	-0.27528	0.034742	Other
ENSG00000070159	PTPN3	protein_coding	P26045	-0.401855	0.0722897	Other
ENSG00000070182	SPTB	protein_coding	P11277	-0.670454	0.00780077	Other
ENSG00000070190	DAPP1	protein_coding	Q9UN19	-1.28478	NA	Other
ENSG00000070193	FGF10	protein_coding	O15520	NA	NA	Other
ENSG00000070214	SLC44A1	protein_coding	Q8WWI5	-0.450628	0.0170582	Other
ENSG00000070269	TMEM260	protein_coding	Q9NX78	0.217579	0.489127	Other
ENSG00000070366	SMG6	protein_coding	Q86US8	0.0212912	0.945576	Other
ENSG00000070367	EXOC5	protein_coding	O00471	-0.214505	0.310648	Other
ENSG00000070371	CLTCL1	protein_coding	P53675	-0.313623	0.117833	Other
ENSG00000070388	FGF22	protein_coding	Q9HCT0	1.50076	NA	Other
ENSG00000070404	FSTL3	protein_coding	O95633	0.170681	0.746682	Other
ENSG00000070413	DGCR2	protein_coding	P98153	0.168721	0.190502	Other
ENSG00000070423	RNF126	protein_coding	Q9BV68	0.498564	0.00127947	Other
ENSG00000070444	MNT	protein_coding	Q99583	0.272545	0.234382	Other
ENSG00000070476	ZXDC	protein_coding	Q2QGD7	0.472754	0.00351109	Other
ENSG00000070495	JMJD6	protein_coding	Q6NYC1	0.125195	0.484726	Other
ENSG00000070501	POLB	protein_coding	P06746	0.00407581	0.991105	Other
ENSG00000070526	ST6GALNAC1	protein_coding	Q9NSC7	-1.84597	NA	Other
ENSG00000070540	WIPI1	protein_coding	Q5MNZ9	1.68133	4.31181e-10	Other
ENSG00000070601	FRMPD1	protein_coding	Q5SYB0	-0.393205	NA	Other
ENSG00000070610	GBA2	protein_coding	Q9HCG7	0.13799	0.356396	Other
ENSG00000070614	NDST1	protein_coding	P52848	0.0678246	0.709554	Other
ENSG00000070669	ASNS	protein_coding	P08243	1.1761	6.69022e-49	Other
ENSG00000070718	AP3M2	protein_coding	P53677	-0.17594	0.373114	Other
ENSG00000070729	CNGB1	protein_coding	Q14028	NA	NA	Other
ENSG00000070731	ST6GALNAC2	protein_coding	Q9UJ37	-0.401937	NA	Other
ENSG00000070748	CHAT	protein_coding	P28329	NA	NA	Other
ENSG00000070756	PABPC1	protein_coding	P11940	0.140435	0.135578	Other
ENSG00000070759	TESK2	protein_coding	Q96S53	-0.314561	0.407732	Other
ENSG00000070761	CFAP20	protein_coding	Q9Y6A4	0.146752	0.351003	Other
ENSG00000070770	CSNK2A2	protein_coding	P19784	0.055585	0.758551	Other
ENSG00000070778	PTPN21	protein_coding	Q16825	0.0693034	0.860095	Other
ENSG00000070785	EIF2B3	protein_coding	Q9NR50	0.307344	0.0221371	Other
ENSG00000070808	CAMK2A	protein_coding	Q9UQM7	NA	NA	Other
ENSG00000070814	TCOF1	protein_coding	Q13428	0.213268	0.0466967	Other
ENSG00000070831	CDC42	protein_coding	P60953	-0.324071	0.00109234	Other
ENSG00000070882	OSBPL3	protein_coding	Q9H4L5	-0.252342	0.239426	Other
ENSG00000070886	EPHA8	protein_coding	P29322	-0.580639	0.245991	Other
ENSG00000070915	SLC12A3	protein_coding	P55017	NA	NA	Other
ENSG00000070950	RAD18	protein_coding	Q9NS91	-0.12707	0.446441	Other
ENSG00000070961	ATP2B1	protein_coding	P20020	0.071599	0.735205	Other
ENSG00000070985	TRPM5	protein_coding	Q9NZQ8	0.574276	NA	Other
ENSG00000071051	NCK2	protein_coding	O43639	0.245382	0.238045	Other
ENSG00000071054	MAP4K4	protein_coding	O95819	0.0215287	0.906575	Other
ENSG00000071073	MGAT4A	protein_coding	Q9UM21	-0.290994	0.336565	Other
ENSG00000071082	RPL31	protein_coding	P62899	0.0679798	0.601596	Other
ENSG00000071127	WDR1	protein_coding	O75083	-0.0704711	0.673622	Other
ENSG00000071189	SNX13	protein_coding	Q9Y5W8	0.00336801	0.991968	Other
ENSG00000071203	MS4A12	protein_coding	Q9NXJ0	1.12607	NA	Other
ENSG00000071205	ARHGAP10	protein_coding	A1A4S6	-0.00772216	0.98457	Other
ENSG00000071242	RPS6KA2	protein_coding	Q15349	0.752853	4.43404e-05	Stress-activated
ENSG00000071243	ING3	protein_coding	Q9NXR8	0.0997743	0.697552	Other
ENSG00000071246	VASH1	protein_coding	Q7L8A9	-0.351215	0.20515	Other
ENSG00000071282	LMCD1	protein_coding	Q9NZU5	-0.175291	0.78572	Other
ENSG00000071462	WBSCR22	protein_coding	#N/A	0.239554	0.046836	Other
ENSG00000071537	SEL1L	protein_coding	Q9UBV2	1.62357	1.4273e-31	Other
ENSG00000071539	TRIP13	protein_coding	Q15645	0.0791331	0.642679	Other
ENSG00000071553	ATP6AP1	protein_coding	Q15904	0.325544	0.013702	Other
ENSG00000071564	TCF3	protein_coding	P15923	-0.103842	0.60604	Other
ENSG00000071575	TRIB2	protein_coding	Q92519	-0.186575	0.730317	Other
ENSG00000071626	DAZAP1	protein_coding	Q96EP5	0.376128	0.00161678	Other
ENSG00000071655	MBD3	protein_coding	O95983	0.314682	0.0579625	Stress-activated
ENSG00000071677	PRLH	protein_coding	P81277	NA	NA	Other
ENSG00000071794	HLTF	protein_coding	Q14527	-0.3242	0.0496189	Other
ENSG00000071859	FAM50A	protein_coding	Q14320	0.264593	0.0264027	Other
ENSG00000071889	FAM3A	protein_coding	P98173	0.298028	0.0585538	Stress-activated
ENSG00000071894	CPSF1	protein_coding	Q10570	0.266297	0.0805248	Other
ENSG00000071909	MYO3B	protein_coding	Q8WXR4	NA	NA	Other
ENSG00000071967	CYBRD1	protein_coding	Q53TN4	0.00206847	0.997212	Other
ENSG00000071991	CDH19	protein_coding	Q9H159	NA	NA	Other
ENSG00000071994	PDCD2	protein_coding	Q16342	-0.033835	0.859534	Other
ENSG00000072041	SLC6A15	protein_coding	Q9H2J7	-0.214943	0.239426	Other
ENSG00000072042	RDH11	protein_coding	Q8TC12	-0.134357	0.39904	Other
ENSG00000072062	PRKACA	protein_coding	P17612	0.139631	0.447063	Other
ENSG00000072071	ADGRL1	protein_coding	O94910	-0.0845581	0.739676	Other
ENSG00000072080	SPP2	protein_coding	Q13103	NA	NA	Other
ENSG00000072110	ACTN1	protein_coding	P12814	-0.0709221	0.703089	Basal-specific
ENSG00000072121	ZFYVE26	protein_coding	Q68DK2	-0.0471598	0.838236	Other
ENSG00000072133	RPS6KA6	protein_coding	Q9UK32	0.0303811	0.942804	Other
ENSG00000072134	EPN2	protein_coding	O95208	-0.0697367	0.822512	Other
ENSG00000072135	PTPN18	protein_coding	Q99952	-0.108134	0.767822	Other
ENSG00000072163	LIMS2	protein_coding	Q7Z4I7	-0.399444	NA	Other
ENSG00000072182	ASIC4	protein_coding	Q96FT7	0.579662	NA	Other
ENSG00000072195	SPEG	protein_coding	Q15772	-0.0366146	0.947382	Other
ENSG00000072201	LNX1	protein_coding	Q8TBB1	0.347748	NA	Other
ENSG00000072210	ALDH3A2	protein_coding	P51648	-0.251366	0.112502	Other
ENSG00000072274	TFRC	protein_coding	P02786	-0.246525	0.0439372	Other
ENSG00000072310	SREBF1	protein_coding	P36956	0.391852	0.0571897	Other
ENSG00000072315	TRPC5	protein_coding	Q9UL62	1.86475	NA	Other
ENSG00000072364	AFF4	protein_coding	Q9UHB7	-0.183594	0.326334	Other
ENSG00000072401	UBE2D1	protein_coding	P51668	-0.330139	0.184137	Other
ENSG00000072415	MPP5	protein_coding	Q8N3R9	-0.429096	0.0344483	Other
ENSG00000072422	RHOBTB1	protein_coding	O94844	-0.293101	0.361402	Other
ENSG00000072501	SMC1A	protein_coding	Q14683	0.0271241	0.871064	Other
ENSG00000072506	HSD17B10	protein_coding	Q99714	0.281899	0.0366592	Other
ENSG00000072518	MARK2	protein_coding	Q7KZI7	0.204082	0.231524	Other
ENSG00000072571	HMMR	protein_coding	O75330	-0.336882	0.0404982	Other
ENSG00000072609	CHFR	protein_coding	Q96EP1	0.226401	0.264886	Other
ENSG00000072657	TRHDE	protein_coding	Q9UKU6	-0.668282	NA	Other
ENSG00000072682	P4HA2	protein_coding	O15460	-0.115931	0.685035	Basal-specific
ENSG00000072694	FCGR2B	protein_coding	P31994	NA	NA	Other
ENSG00000072736	NFATC3	protein_coding	Q12968	-0.0451967	0.895621	Other
ENSG00000072756	TRNT1	protein_coding	Q96Q11	0.0482458	0.877637	Other
ENSG00000072778	ACADVL	protein_coding	P49748	0.365483	0.00403561	Other
ENSG00000072786	STK10	protein_coding	O94804	0.206223	0.32901	Other
ENSG00000072803	FBXW11	protein_coding	Q9UKB1	-0.00681178	0.977176	Other
ENSG00000072818	ACAP1	protein_coding	Q15027	0.408485	0.488075	Other
ENSG00000072832	CRMP1	protein_coding	Q14194	-0.54798	0.145845	Other
ENSG00000072840	EVC	protein_coding	P57679	-0.166114	0.610668	Other
ENSG00000072849	DERL2	protein_coding	Q9GZP9	0.873573	2.02959e-14	Other
ENSG00000072858	SIDT1	protein_coding	Q9NXL6	-0.305126	NA	Other
ENSG00000072864	NDE1	protein_coding	Q9NXR1	-0.875617	NA	Other
ENSG00000072952	MRVI1	protein_coding	Q9Y6F6	1.27085	NA	Other
ENSG00000072954	TMEM38A	protein_coding	Q9H6F2	-0.943551	0.0119007	Other
ENSG00000072958	AP1M1	protein_coding	Q9BXS5	0.221505	0.167095	Other
ENSG00000073008	PVR	protein_coding	P15151	0.230238	0.0912104	Other
ENSG00000073050	XRCC1	protein_coding	P18887	0.438906	0.00413911	Other
ENSG00000073060	SCARB1	protein_coding	Q8WTV0	0.181434	0.357948	Common
ENSG00000073067	CYP2W1	protein_coding	Q8TAV3	0.621594	NA	Other
ENSG00000073111	MCM2	protein_coding	P49736	0.0636947	0.625504	Other
ENSG00000073146	MOV10L1	protein_coding	Q9BXT6	-0.636878	NA	Other
ENSG00000073150	PANX2	protein_coding	Q96RD6	-0.849232	0.0639572	Other
ENSG00000073169	SELENOO	protein_coding	Q9BVL4	0.417584	0.0382425	Other
ENSG00000073282	TP63	protein_coding	Q9H3D4	-1.83635	NA	Other
ENSG00000073331	ALPK1	protein_coding	Q96QP1	0.210106	0.635278	Other
ENSG00000073350	LLGL2	protein_coding	Q6P1M3	-0.263552	0.337772	Other
ENSG00000073417	PDE8A	protein_coding	O60658	-0.0161745	0.956316	Other
ENSG00000073464	CLCN4	protein_coding	P51793	-0.272704	NA	Other
ENSG00000073536	NLE1	protein_coding	Q9NVX2	0.252795	0.115434	Other
ENSG00000073578	SDHA	protein_coding	P31040	0.173457	0.161665	Other
ENSG00000073584	SMARCE1	protein_coding	Q969G3	-0.00640983	0.984371	Other
ENSG00000073598	FNDC8	protein_coding	Q8TC99	-0.272704	NA	Other
ENSG00000073605	GSDMB	protein_coding	Q8TAX9	-0.153398	0.808828	Other
ENSG00000073614	KDM5A	protein_coding	P29375	-0.143821	0.366063	Other
ENSG00000073670	ADAM11	protein_coding	O75078	-0.502098	0.0556473	Other
ENSG00000073711	PPP2R3A	protein_coding	Q06190	-0.666591	0.125817	Other
ENSG00000073712	FERMT2	protein_coding	Q96AC1	0.193418	0.225081	Other
ENSG00000073734	ABCB11	protein_coding	O95342	NA	NA	Other
ENSG00000073737	DHRS9	protein_coding	Q9BPW9	1.55059	NA	Other
ENSG00000073754	CD5L	protein_coding	O43866	NA	NA	Other
ENSG00000073756	PTGS2	protein_coding	P35354	0.117483	0.880366	Other
ENSG00000073792	IGF2BP2	protein_coding	Q9Y6M1	-0.150439	0.424401	Other
ENSG00000073803	MAP3K13	protein_coding	O43283	-0.21308	0.444339	Other
ENSG00000073849	ST6GAL1	protein_coding	P15907	-0.857153	0.0175817	Other
ENSG00000073861	TBX21	protein_coding	Q9UL17	-0.875033	NA	Other
ENSG00000073905	VDAC1P1	processed_pseudogene	#N/A	-0.01097	0.989954	Other
ENSG00000073910	FRY	protein_coding	Q5TBA9	-0.73625	0.232573	Other
ENSG00000073921	PICALM	protein_coding	Q13492	-0.0607553	0.751481	Other
ENSG00000073969	NSF	protein_coding	P46459	-1.75202	NA	Other
ENSG00000074047	GLI2	protein_coding	P10070	-0.459998	0.158864	Other
ENSG00000074054	CLASP1	protein_coding	Q7Z460	-0.22266	0.139488	Other
ENSG00000074071	MRPS34	protein_coding	P82930	0.317035	0.01317	Other
ENSG00000074181	NOTCH3	protein_coding	Q9UM47	-1.34276	1.25542e-13	Basal-specific
ENSG00000074201	CLNS1A	protein_coding	P54105	0.053401	0.741909	Other
ENSG00000074211	PPP2R2C	protein_coding	Q9Y2T4	-0.97812	0.0589308	Other
ENSG00000074219	TEAD2	protein_coding	Q15562	-0.285325	0.405282	Other
ENSG00000074266	EED	protein_coding	O75530	-0.0889638	0.678761	Other
ENSG00000074276	CDHR2	protein_coding	Q9BYE9	-1.04998	NA	Other
ENSG00000074317	SNCB	protein_coding	Q16143	-0.121031	0.894869	Other
ENSG00000074319	TSG101	protein_coding	Q99816	0.0994787	0.606958	Other
ENSG00000074356	NCBP3	protein_coding	Q53F19	0.0245639	0.90236	Other
ENSG00000074370	ATP2A3	protein_coding	Q93084	-0.755781	0.253166	Other
ENSG00000074410	CA12	protein_coding	O43570	-0.639947	0.278567	Other
ENSG00000074416	MGLL	protein_coding	Q99685	-0.543722	NA	Other
ENSG00000074527	NTN4	protein_coding	Q9HB63	-0.37594	NA	Other
ENSG00000074582	BCS1L	protein_coding	Q9Y276	0.264721	0.0273519	Other
ENSG00000074590	NUAK1	protein_coding	O60285	-0.375431	0.201763	Other
ENSG00000074603	DPP8	protein_coding	Q6V1X1	-0.34916	0.104492	Other
ENSG00000074621	SLC24A1	protein_coding	O60721	0.277752	0.249742	Other
ENSG00000074657	ZNF532	protein_coding	Q9HCE3	-0.155399	0.666528	Other
ENSG00000074660	SCARF1	protein_coding	Q14162	NA	NA	Other
ENSG00000074695	LMAN1	protein_coding	P49257	0.47719	6.92671e-05	Other
ENSG00000074696	HACD3	protein_coding	Q9P035	-0.223722	0.0414468	Other
ENSG00000074706	IPCEF1	protein_coding	Q8WWN9	0.549405	NA	Other
ENSG00000074755	ZZEF1	protein_coding	O43149	0.240112	0.0295485	Other
ENSG00000074771	NOX3	protein_coding	Q9HBY0	NA	NA	Other
ENSG00000074800	ENO1	protein_coding	P06733	0.103756	0.412357	Other
ENSG00000074803	SLC12A1	protein_coding	Q13621	0.746926	NA	Other
ENSG00000074842	MYDGF	protein_coding	Q969H8	1.41189	7.88142e-33	Other
ENSG00000074855	ANO8	protein_coding	Q9HCE9	-0.0110582	0.977814	Other
ENSG00000074935	TUBE1	protein_coding	Q9UJT0	0.351462	0.0426934	Other
ENSG00000074964	ARHGEF10L	protein_coding	Q9HCE6	-0.10602	0.822512	Other
ENSG00000074966	TXK	protein_coding	P42681	0.445313	NA	Other
ENSG00000075035	WSCD2	protein_coding	Q2TBF2	1.0073	NA	Other
ENSG00000075043	KCNQ2	protein_coding	O43526	-0.950055	0.0149945	Other
ENSG00000075073	TACR2	protein_coding	P21452	2.32825	NA	Other
ENSG00000075089	ACTR6	protein_coding	Q9GZN1	-0.101239	0.696285	Other
ENSG00000075131	TIPIN	protein_coding	Q9BVW5	-0.129571	0.494356	Other
ENSG00000075142	SRI	protein_coding	P30626	0.155664	0.350358	Other
ENSG00000075151	EIF4G3	protein_coding	O43432	-0.0780714	0.672205	Other
ENSG00000075188	NUP37	protein_coding	Q8NFH4	-0.0273552	0.923605	Other
ENSG00000075213	SEMA3A	protein_coding	Q14563	-0.968922	0.11261	Basal-specific
ENSG00000075218	GTSE1	protein_coding	Q9NYZ3	0.161161	0.22031	Other
ENSG00000075223	SEMA3C	protein_coding	Q99985	-0.67671	0.00570495	Other
ENSG00000075234	TTC38	protein_coding	Q5R3I4	0.0793023	0.735943	Other
ENSG00000075239	ACAT1	protein_coding	P24752	-0.00457561	0.983909	Other
ENSG00000075240	GRAMD4	protein_coding	Q6IC98	0.016766	0.968727	Other
ENSG00000075275	CELSR1	protein_coding	Q9NYQ6	-0.288927	0.147676	Other
ENSG00000075290	WNT8B	protein_coding	Q93098	-0.717798	NA	Other
ENSG00000075292	ZNF638	protein_coding	Q14966	-0.288273	0.0547241	Other
ENSG00000075303	SLC25A40	protein_coding	Q8TBP6	-0.463013	0.0825103	Other
ENSG00000075336	TIMM21	protein_coding	Q9BVV7	-0.055598	0.80975	Other
ENSG00000075340	ADD2	protein_coding	P35612	-0.231285	0.19255	Other
ENSG00000075388	FGF4	protein_coding	P08620	NA	NA	Other
ENSG00000075391	RASAL2	protein_coding	Q9UJF2	-0.220915	0.33639	Other
ENSG00000075399	VPS9D1	protein_coding	Q9Y2B5	0.21763	0.47419	Other
ENSG00000075407	ZNF37A	protein_coding	P17032	-0.112622	0.688198	Other
ENSG00000075413	MARK3	protein_coding	P27448	0.0785387	0.586769	Other
ENSG00000075415	SLC25A3	protein_coding	Q00325	-0.223849	0.0162856	Other
ENSG00000075420	FNDC3B	protein_coding	Q53EP0	0.881642	9.35471e-07	Other
ENSG00000075426	FOSL2	protein_coding	P15408	0.0203866	0.956276	Other
ENSG00000075429	CACNG5	protein_coding	Q9UF02	-2.13757	NA	Other
ENSG00000075461	CACNG4	protein_coding	Q9UBN1	-0.0843682	NA	Other
ENSG00000075539	FRYL	protein_coding	O94915	-0.449612	0.0258058	Other
ENSG00000075568	TMEM131	protein_coding	Q92545	-0.131028	0.486576	Other
ENSG00000075618	FSCN1	protein_coding	Q16658	-0.673596	0.000193241	Other
ENSG00000075624	ACTB	protein_coding	P60709	-0.315218	0.00289527	Other
ENSG00000075643	MOCOS	protein_coding	Q96EN8	0.0950519	0.770572	Other
ENSG00000075651	PLD1	protein_coding	Q13393	-0.786968	0.0610673	Other
ENSG00000075673	ATP12A	protein_coding	P54707	0.287162	NA	Other
ENSG00000075702	WDR62	protein_coding	O43379	0.205362	0.135675	Other
ENSG00000075711	DLG1	protein_coding	Q12959	-0.0713175	0.780229	Other
ENSG00000075785	RAB7A	protein_coding	P51149	0.0391337	0.801695	Other
ENSG00000075790	BCAP29	protein_coding	Q9UHQ4	0.0840169	0.726742	Other
ENSG00000075826	SEC31B	protein_coding	Q9NQW1	-0.21258	0.497524	Other
ENSG00000075856	SART3	protein_coding	Q15020	0.101433	0.458091	Other
ENSG00000075884	ARHGAP15	protein_coding	Q53QZ3	0.599581	NA	Other
ENSG00000075886	TUBA3D	protein_coding	P0DPH8	-0.67541	NA	Other
ENSG00000075891	PAX2	protein_coding	Q02962	0.634294	NA	Other
ENSG00000075914	EXOSC7	protein_coding	Q15024	0.116287	0.554147	Other
ENSG00000075945	KIFAP3	protein_coding	Q92845	0.0507903	0.855042	Other
ENSG00000075975	MKRN2	protein_coding	Q9H000	0.183942	0.207734	Other
ENSG00000076003	MCM6	protein_coding	Q14566	-0.204368	0.0487086	Other
ENSG00000076043	REXO2	protein_coding	Q9Y3B8	0.393714	0.0400462	Other
ENSG00000076053	RBM7	protein_coding	Q9Y580	-0.00270873	0.995137	Other
ENSG00000076067	RBMS2	protein_coding	Q15434	-0.394546	0.144581	Other
ENSG00000076108	BAZ2A	protein_coding	Q9UIF9	-0.206879	0.0874454	Other
ENSG00000076201	PTPN23	protein_coding	Q9H3S7	0.422966	0.00125345	Other
ENSG00000076242	MLH1	protein_coding	P40692	-0.524656	NA	Other
ENSG00000076248	UNG	protein_coding	P13051	0.24695	0.0310741	Other
ENSG00000076258	FMO4	protein_coding	P31512	-0.922442	NA	Other
ENSG00000076321	KLHL20	protein_coding	Q9Y2M5	-0.145464	0.648656	Other
ENSG00000076344	RGS11	protein_coding	O94810	0.838813	NA	Other
ENSG00000076351	SLC46A1	protein_coding	Q96NT5	0.0952909	0.84038	Other
ENSG00000076356	PLXNA2	protein_coding	O75051	0.233745	0.475391	Other
ENSG00000076382	SPAG5	protein_coding	Q96R06	-0.235538	0.132963	Other
ENSG00000076513	ANKRD13A	protein_coding	Q8IZ07	0.0546449	0.824639	Other
ENSG00000076554	TPD52	protein_coding	P55327	0.0400173	0.892466	Other
ENSG00000076555	ACACB	protein_coding	O00763	-0.204158	0.44793	Other
ENSG00000076604	TRAF4	protein_coding	Q9BUZ4	-0.210581	0.264034	Other
ENSG00000076641	PAG1	protein_coding	Q9NWQ8	-0.169327	0.624333	Other
ENSG00000076650	GPATCH1	protein_coding	Q9BRR8	0.0974759	0.709529	Other
ENSG00000076662	ICAM3	protein_coding	P32942	-1.56909	NA	Other
ENSG00000076685	NT5C2	protein_coding	P49902	-0.0745419	0.83081	Other
ENSG00000076706	MCAM	protein_coding	P43121	-0.170994	0.544409	Common
ENSG00000076716	GPC4	protein_coding	O75487	-0.262365	0.276245	Common
ENSG00000076770	MBNL3	protein_coding	Q9NUK0	-0.364776	0.215934	Other
ENSG00000076826	CAMSAP3	protein_coding	Q9P1Y5	0.0697985	0.82905	Other
ENSG00000076864	RAP1GAP	protein_coding	P47736	-0.712349	0.0527921	Other
ENSG00000076924	XAB2	protein_coding	Q9HCS7	0.47489	0.000867969	Basal-specific
ENSG00000076928	ARHGEF1	protein_coding	Q92888	0.462093	0.0077252	Basal-specific
ENSG00000076944	STXBP2	protein_coding	Q15833	0.414291	0.0786273	Other
ENSG00000076984	MAP2K7	protein_coding	O14733	0.391598	0.0141835	Other
ENSG00000077009	NMRK2	protein_coding	Q9NPI5	-0.778624	NA	Other
ENSG00000077044	DGKD	protein_coding	Q16760	0.1875	0.298527	Other
ENSG00000077063	CTTNBP2	protein_coding	Q8WZ74	-0.476399	0.320513	Other
ENSG00000077080	ACTL6B	protein_coding	O94805	1.30833	NA	Other
ENSG00000077092	RARB	protein_coding	P10826	-0.672311	0.0473077	Other
ENSG00000077097	TOP2B	protein_coding	Q02880	-0.197678	0.158394	Other
ENSG00000077147	TM9SF3	protein_coding	Q9HD45	0.342624	0.00767708	Common
ENSG00000077150	NFKB2	protein_coding	Q00653	0.0271692	0.926594	Other
ENSG00000077152	UBE2T	protein_coding	Q9NPD8	-0.00763765	0.973366	Other
ENSG00000077157	PPP1R12B	protein_coding	O60237	-0.181429	0.441525	Other
ENSG00000077232	DNAJC10	protein_coding	Q8IXB1	0.926445	2.5363e-15	Other
ENSG00000077235	GTF3C1	protein_coding	Q12789	-0.0358666	0.812628	Other
ENSG00000077238	IL4R	protein_coding	P24394	-0.543515	0.215775	Other
ENSG00000077254	USP33	protein_coding	Q8TEY7	-0.266676	0.106265	Other
ENSG00000077264	PAK3	protein_coding	O75914	0.0883429	NA	Other
ENSG00000077274	CAPN6	protein_coding	Q9Y6Q1	1.84818	NA	Other
ENSG00000077279	DCX	protein_coding	O43602	0.0464942	NA	Other
ENSG00000077312	SNRPA	protein_coding	P09012	0.681686	7.75396e-09	Other
ENSG00000077327	SPAG6	protein_coding	O75602	-0.220083	NA	Other
ENSG00000077348	EXOSC5	protein_coding	Q9NQT4	0.450648	0.0139077	Other
ENSG00000077380	DYNC1I2	protein_coding	Q13409	-0.0835266	0.685797	Other
ENSG00000077420	APBB1IP	protein_coding	Q7Z5R6	-0.655804	NA	Other
ENSG00000077454	LRCH4	protein_coding	O75427	0.380611	0.226707	Other
ENSG00000077458	FAM76B	protein_coding	Q5HYJ3	0.122735	0.717421	Other
ENSG00000077463	SIRT6	protein_coding	Q8N6T7	0.26802	0.185032	Other
ENSG00000077498	TYR	protein_coding	P14679	NA	NA	Other
ENSG00000077514	POLD3	protein_coding	Q15054	-0.231642	0.144	Other
ENSG00000077522	ACTN2	protein_coding	P35609	-0.0330433	0.919972	Other
ENSG00000077549	CAPZB	protein_coding	P47756	0.176345	0.226162	Other
ENSG00000077585	GPR137B	protein_coding	O60478	-0.521205	0.180947	Other
ENSG00000077616	NAALAD2	protein_coding	Q9Y3Q0	-0.748874	0.112288	Other
ENSG00000077684	JADE1	protein_coding	Q6IE81	-0.0512116	0.822297	Other
ENSG00000077713	SLC25A43	protein_coding	Q8WUT9	-0.362019	0.431937	Other
ENSG00000077721	UBE2A	protein_coding	P49459	-0.109272	0.451304	Other
ENSG00000077782	FGFR1	protein_coding	P11362	-0.180505	0.327859	Other
ENSG00000077800	FKBP6	protein_coding	O75344	1.01744	NA	Other
ENSG00000077935	SMC1B	protein_coding	Q8NDV3	-0.557366	NA	Other
ENSG00000077942	FBLN1	protein_coding	P23142	-0.0853704	0.746682	Common
ENSG00000077943	ITGA8	protein_coding	P53708	-0.439581	0.207889	Other
ENSG00000077984	CST7	protein_coding	O76096	-0.299549	NA	Other
ENSG00000078018	MAP2	protein_coding	P11137	0.121706	NA	Other
ENSG00000078043	PIAS2	protein_coding	O75928	-0.169688	0.505067	Other
ENSG00000078053	AMPH	protein_coding	P49418	-0.669192	0.0587855	Other
ENSG00000078061	ARAF	protein_coding	P10398	0.465832	0.000634259	Stress-activated
ENSG00000078070	MCCC1	protein_coding	Q96RQ3	0.184188	0.412227	Other
ENSG00000078081	LAMP3	protein_coding	Q9UQV4	-0.0766169	NA	Other
ENSG00000078098	FAP	protein_coding	Q12884	NA	NA	Other
ENSG00000078114	NEBL	protein_coding	O76041	-0.56218	0.0290637	Other
ENSG00000078124	ACER3	protein_coding	Q9NUN7	-0.119523	0.710074	Other
ENSG00000078140	UBE2K	protein_coding	P61086	0.00928275	0.967806	Other
ENSG00000078142	PIK3C3	protein_coding	Q8NEB9	-0.218437	0.293439	Other
ENSG00000078177	N4BP2	protein_coding	Q86UW6	0.529223	0.0267941	Other
ENSG00000078237	TIGAR	protein_coding	Q9NQ88	-0.38593	0.0673375	Other
ENSG00000078246	TULP3	protein_coding	O75386	0.760713	2.60576e-09	Other
ENSG00000078269	SYNJ2	protein_coding	O15056	-0.361882	0.0765506	Other
ENSG00000078295	ADCY2	protein_coding	Q08462	NA	NA	Other
ENSG00000078304	PPP2R5C	protein_coding	Q13362	-0.24845	0.0490548	Other
ENSG00000078319	PMS2P1	unprocessed_pseudogene	A4D2B8	0.24785	0.586583	Other
ENSG00000078328	RBFOX1	protein_coding	Q9NWB1	NA	NA	Other
ENSG00000078369	GNB1	protein_coding	P62873	0.182289	0.0569449	Other
ENSG00000078399	HOXA9	protein_coding	P31269	-0.161737	0.298527	Other
ENSG00000078401	EDN1	protein_coding	P05305	0.386196	NA	Other
ENSG00000078403	MLLT10	protein_coding	P55197	-0.206113	0.286222	Other
ENSG00000078487	ZCWPW1	protein_coding	Q9H0M4	0.112731	0.864048	Other
ENSG00000078549	ADCYAP1R1	protein_coding	P41586	-0.743645	0.145047	Other
ENSG00000078579	FGF20	protein_coding	Q9NP95	-1.16154	NA	Other
ENSG00000078589	P2RY10	protein_coding	O00398	NA	NA	Other
ENSG00000078596	ITM2A	protein_coding	O43736	0.469786	NA	Other
ENSG00000078618	NRDC	protein_coding	O43847	-0.0259946	0.880398	Other
ENSG00000078668	VDAC3	protein_coding	Q9Y277	-0.233194	0.0741842	Other
ENSG00000078674	PCM1	protein_coding	Q15154	-0.0608423	0.789855	Other
ENSG00000078687	TNRC6C	protein_coding	Q9HCJ0	-0.0927321	0.730297	Other
ENSG00000078699	CBFA2T2	protein_coding	O43439	0.0171248	0.960385	Other
ENSG00000078725	BRINP1	protein_coding	O60477	-0.875617	NA	Other
ENSG00000078747	ITCH.1	protein_coding	#N/A	0.104651	0.694518	Other
ENSG00000078795	PKD2L2	protein_coding	Q9NZM6	-0.523019	NA	Other
ENSG00000078804	TP53INP2	protein_coding	Q8IXH6	-0.101323	0.7914	Other
ENSG00000078808	SDF4	protein_coding	Q9BRK5	0.695953	1.06404e-09	Stress-activated
ENSG00000078814	MYH7B	protein_coding	A7E2Y1	0.397776	0.589847	Other
ENSG00000078898	BPIFB2	protein_coding	Q8N4F0	NA	NA	Other
ENSG00000078900	TP73	protein_coding	O15350	-0.174444	0.648006	Other
ENSG00000078902	TOLLIP	protein_coding	Q9H0E2	0.254763	0.187313	Other
ENSG00000078967	UBE2D4	protein_coding	Q9Y2X8	0.13467	0.831168	Other
ENSG00000079101	CLUL1	protein_coding	Q15846	1.1594	NA	Other
ENSG00000079102	RUNX1T1	protein_coding	Q06455	-0.12987	0.844462	Other
ENSG00000079112	CDH17	protein_coding	Q12864	NA	NA	Other
ENSG00000079134	THOC1	protein_coding	Q96FV9	0.0706655	0.753842	Other
ENSG00000079150	FKBP7	protein_coding	Q9Y680	0.267113	0.414257	Other
ENSG00000079156	OSBPL6	protein_coding	Q9BZF3	-0.00358186	0.991105	Other
ENSG00000079215	SLC1A3	protein_coding	P43003	-0.254916	0.205565	Other
ENSG00000079246	XRCC5	protein_coding	P13010	-0.0900018	0.456286	Other
ENSG00000079257	LXN	protein_coding	Q9BS40	-0.603274	NA	Other
ENSG00000079263	SP140	protein_coding	Q13342	NA	NA	Other
ENSG00000079277	MKNK1	protein_coding	Q9BUB5	-0.0590154	0.862485	Other
ENSG00000079308	TNS1	protein_coding	Q9HBL0	-1.3333	NA	Other
ENSG00000079313	REXO1	protein_coding	Q8N1G1	0.334948	0.11088	Stress-activated
ENSG00000079332	SAR1A	protein_coding	Q9NR31	0.0456583	0.813833	Other
ENSG00000079335	CDC14A	protein_coding	Q9UNH5	-0.734149	0.042418	Other
ENSG00000079337	RAPGEF3	protein_coding	O95398	1.08779	0.0436422	Other
ENSG00000079385	CEACAM1	protein_coding	P13688	-0.854437	NA	Other
ENSG00000079387	SENP1	protein_coding	Q9P0U3	-0.0707852	0.773513	Other
ENSG00000079393	DUSP13	protein_coding	Q9UII6	-0.875617	NA	Other
ENSG00000079432	CIC	protein_coding	Q96RK0	0.25266	0.125817	Other
ENSG00000079435	LIPE	protein_coding	Q05469	0.187868	0.708649	Other
ENSG00000079459	FDFT1	protein_coding	P37268	-0.324867	0.00157601	Other
ENSG00000079462	PAFAH1B3	protein_coding	Q15102	0.168811	0.60604	Other
ENSG00000079482	OPHN1	protein_coding	O60890	0.0717705	0.898556	Other
ENSG00000079557	AFM	protein_coding	P43652	NA	NA	Other
ENSG00000079616	KIF22	protein_coding	Q14807	0.164522	0.23434	Other
ENSG00000079689	SCGN	protein_coding	O76038	NA	NA	Other
ENSG00000079691	CARMIL1	protein_coding	Q5VZK9	-0.763726	0.00868545	Other
ENSG00000079739	PGM1	protein_coding	P36871	-0.00759368	0.97448	Other
ENSG00000079785	DDX1	protein_coding	Q92499	0.0726453	0.620794	Other
ENSG00000079805	DNM2	protein_coding	P50570	0.403854	1.29842e-05	Other
ENSG00000079819	EPB41L2	protein_coding	O43491	-0.252042	0.108166	Other
ENSG00000079841	RIMS1	protein_coding	Q86UR5	-0.260169	NA	Other
ENSG00000079931	MOXD1	protein_coding	Q6UVY6	-0.541631	0.0189302	Other
ENSG00000079950	STX7	protein_coding	O15400	-0.118084	0.659911	Other
ENSG00000079974	RABL2B	protein_coding	Q9UNT1	0.266827	0.259063	Other
ENSG00000079999	KEAP1	protein_coding	Q14145	0.248043	0.111282	Other
ENSG00000080007	DDX43	protein_coding	Q9NXZ2	NA	NA	Other
ENSG00000080031	PTPRH	protein_coding	Q9HD43	-1.29669	NA	Other
ENSG00000080166	DCT	protein_coding	P40126	-0.251818	NA	Other
ENSG00000080189	SLC35C2	protein_coding	Q9NQQ7	0.330547	0.045872	Stress-activated
ENSG00000080200	CRYBG3	protein_coding	Q68DQ2	-0.571607	0.0347715	Other
ENSG00000080224	EPHA6	protein_coding	Q9UF33	-0.267149	0.614021	Other
ENSG00000080293	SCTR	protein_coding	P47872	-0.875617	NA	Other
ENSG00000080298	RFX3	protein_coding	P48380	-0.30419	0.458091	Other
ENSG00000080345	RIF1	protein_coding	Q5UIP0	-0.276688	0.510452	Other
ENSG00000080371	RAB21	protein_coding	Q9UL25	0.00185508	0.994692	Other
ENSG00000080493	SLC4A4	protein_coding	Q9Y6R1	-0.3818	0.484237	Other
ENSG00000080503	SMARCA2	protein_coding	P51531	0.287972	0.0891638	Other
ENSG00000080511	RDH8	protein_coding	Q9NYR8	NA	NA	Other
ENSG00000080546	SESN1	protein_coding	Q9Y6P5	-0.391218	0.0395731	Other
ENSG00000080561	MID2	protein_coding	Q9UJV3	0.0557821	0.855388	Other
ENSG00000080572	PIH1D3	protein_coding	Q9NQM4	1.12593	NA	Other
ENSG00000080573	COL5A3	protein_coding	P25940	-0.178124	NA	Other
ENSG00000080603	SRCAP	protein_coding	Q6ZRS2	-0.103428	0.807683	Other
ENSG00000080608	PUM3	protein_coding	Q15397	0.188645	0.293112	Other
ENSG00000080618	CPB2	protein_coding	Q96IY4	-1.7289	NA	Other
ENSG00000080644	CHRNA3	protein_coding	P32297	-0.763863	0.108884	Other
ENSG00000080709	KCNN2	protein_coding	Q9H2S1	-0.131452	NA	Other
ENSG00000080802	CNOT4	protein_coding	O95628	-0.085859	0.701393	Other
ENSG00000080815	PSEN1	protein_coding	P49768	-0.0163604	0.94952	Other
ENSG00000080819	CPOX	protein_coding	P36551	-0.160983	0.357414	Other
ENSG00000080822	CLDND1	protein_coding	Q9NY35	-0.280876	0.123147	Other
ENSG00000080823	MOK	protein_coding	Q9UQ07	0.261465	0.269135	Other
ENSG00000080824	HSP90AA1	protein_coding	P07900	-0.421673	4.40002e-06	Other
ENSG00000080839	RBL1	protein_coding	P28749	-0.235822	0.25929	Other
ENSG00000080845	DLGAP4	protein_coding	Q9Y2H0	0.337127	0.168782	Other
ENSG00000080854	IGSF9B	protein_coding	Q9UPX0	-0.250465	0.559498	Other
ENSG00000080910	CFHR2	protein_coding	P36980	NA	NA	Other
ENSG00000080947	CROCCP3	transcribed_unprocessed_pseudogene	Q8IVE0	-0.272929	0.658424	Other
ENSG00000080986	NDC80	protein_coding	O14777	-0.218397	0.208891	Other
ENSG00000081014	AP4E1	protein_coding	Q9UPM8	-0.0934346	0.746682	Other
ENSG00000081019	RSBN1	protein_coding	Q5VWQ0	0.0558937	0.834841	Other
ENSG00000081026	MAGI3	protein_coding	Q5TCQ9	-0.370353	0.0929878	Other
ENSG00000081041	CXCL2	protein_coding	P19875	-0.188534	NA	Other
ENSG00000081051	AFP	protein_coding	P02771	-0.875617	NA	Other
ENSG00000081052	COL4A4	protein_coding	P53420	-0.166905	NA	Other
ENSG00000081059	TCF7	protein_coding	P36402	-0.304192	0.400805	Other
ENSG00000081087	OSTM1	protein_coding	Q86WC4	-0.163728	0.589586	Other
ENSG00000081138	CDH7	protein_coding	Q9ULB5	NA	NA	Other
ENSG00000081148	IMPG2	protein_coding	Q9BZV3	-0.897833	NA	Other
ENSG00000081154	PCNP	protein_coding	Q8WW12	-0.100441	0.550251	Other
ENSG00000081177	EXD2	protein_coding	Q9NVH0	0.0623407	0.822093	Other
ENSG00000081181	ARG2	protein_coding	P78540	0.0226412	0.957725	Other
ENSG00000081189	MEF2C	protein_coding	Q06413	-0.0178261	0.967017	Other
ENSG00000081237	PTPRC	protein_coding	P08575	1.19649	NA	Other
ENSG00000081248	CACNA1S	protein_coding	Q13698	NA	NA	Other
ENSG00000081277	PKP1	protein_coding	Q13835	NA	NA	Other
ENSG00000081307	UBA5	protein_coding	Q9GZZ9	0.420845	0.00141559	Other
ENSG00000081320	STK17B	protein_coding	O94768	-0.285309	0.241549	Other
ENSG00000081377	CDC14B	protein_coding	O60729	-0.0451995	0.883166	Other
ENSG00000081386	ZNF510	protein_coding	Q9Y2H8	-0.56127	0.0872434	Other
ENSG00000081479	LRP2	protein_coding	P98164	-1.27409	6.97521e-08	Stress-activated
ENSG00000081665	ZNF506	protein_coding	Q5JVG8	0.373419	0.57645	Other
ENSG00000081692	JMJD4	protein_coding	Q9H9V9	0.292639	0.305857	Other
ENSG00000081721	DUSP12	protein_coding	Q9UNI6	0.33001	0.0901829	Other
ENSG00000081760	AACS	protein_coding	Q86V21	0.205245	0.220685	Other
ENSG00000081791	KIAA0141	protein_coding	#N/A	0.222166	0.160056	Other
ENSG00000081800	SLC13A1	protein_coding	Q9BZW2	NA	NA	Other
ENSG00000081803	CADPS2	protein_coding	Q86UW7	0.268409	0.439653	Other
ENSG00000081818	PCDHB4	protein_coding	Q9Y5E5	-0.875617	NA	Other
ENSG00000081842	PCDHA6	protein_coding	Q9UN73	NA	NA	Other
ENSG00000081853	PCDHGA2	protein_coding	Q9Y5H1	-2.42384	NA	Other
ENSG00000081870	HSPB11	protein_coding	Q9Y547	0.0437365	0.887814	Other
ENSG00000081913	PHLPP1	protein_coding	O60346	-0.250042	0.305635	Other
ENSG00000081923	ATP8B1	protein_coding	O43520	-1.23405	NA	Other
ENSG00000081985	IL12RB2	protein_coding	Q99665	-0.243344	NA	Other
ENSG00000082014	SMARCD3	protein_coding	Q6STE5	-0.107149	0.687537	Other
ENSG00000082068	WDR70	protein_coding	Q9NW82	0.0648252	0.768474	Other
ENSG00000082074	FYB	protein_coding	#N/A	-1.78783	NA	Other
ENSG00000082126	MPP4	protein_coding	Q96JB8	0.0206954	NA	Other
ENSG00000082146	STRADB	protein_coding	Q9C0K7	-0.108289	0.67759	Other
ENSG00000082153	BZW1	protein_coding	Q7L1Q6	-0.371303	0.00305174	Other
ENSG00000082175	PGR	protein_coding	P06401	-0.875617	NA	Other
ENSG00000082196	C1QTNF3	protein_coding	Q9BXJ4	0.886283	NA	Other
ENSG00000082212	ME2	protein_coding	P23368	-0.00962353	0.973154	Other
ENSG00000082213	C5orf22	protein_coding	Q49AR2	0.0767714	0.795821	Other
ENSG00000082258	CCNT2	protein_coding	O60583	-0.208825	0.349254	Other
ENSG00000082269	FAM135A	protein_coding	Q9P2D6	-0.220198	0.390418	Other
ENSG00000082293	COL19A1	protein_coding	Q14993	-0.561443	NA	Other
ENSG00000082397	EPB41L3	protein_coding	Q9Y2J2	-0.084468	0.729113	Other
ENSG00000082438	COBLL1	protein_coding	Q53SF7	-0.140243	0.695662	Other
ENSG00000082458	DLG3	protein_coding	Q92796	-0.203994	0.385962	Other
ENSG00000082482	KCNK2	protein_coding	O95069	1.0073	NA	Other
ENSG00000082497	SERTAD4	protein_coding	Q9NUC0	-0.718734	NA	Other
ENSG00000082512	TRAF5	protein_coding	O00463	-0.646372	0.0462963	Other
ENSG00000082515	MRPL22	protein_coding	Q9NWU5	0.0319916	0.885199	Other
ENSG00000082516	GEMIN5	protein_coding	Q8TEQ6	0.0177712	0.938846	Other
ENSG00000082556	OPRK1	protein_coding	P41145	1.12607	NA	Other
ENSG00000082641	NFE2L1	protein_coding	Q14494	0.303082	0.0160013	Other
ENSG00000082684	SEMA5B	protein_coding	Q9P283	-3.03174	NA	Other
ENSG00000082701	GSK3B	protein_coding	P49841	-0.246487	0.164629	Other
ENSG00000082781	ITGB5	protein_coding	P18084	-0.294434	0.188299	Other
ENSG00000082805	ERC1	protein_coding	Q8IUD2	-0.20132	0.286519	Other
ENSG00000082898	XPO1	protein_coding	O14980	-0.412136	0.000144182	Other
ENSG00000082929	LINC01587	processed_transcript	Q99440	NA	NA	Other
ENSG00000082996	RNF13	protein_coding	O43567	0.186736	0.412227	Other
ENSG00000083067	TRPM3	protein_coding	Q9HCF6	0.353952	NA	Other
ENSG00000083093	PALB2	protein_coding	Q86YC2	0.0764822	0.791734	Other
ENSG00000083097	DOPEY1	protein_coding	Q5JWR5	-0.13286	0.650739	Other
ENSG00000083099	LYRM2	protein_coding	Q9NU23	-0.0789499	0.719151	Other
ENSG00000083123	BCKDHB	protein_coding	P21953	0.0831105	0.815171	Other
ENSG00000083168	KAT6A	protein_coding	Q92794	-0.0366714	0.870285	Other
ENSG00000083223	ZCCHC6	protein_coding	#N/A	-0.465249	0.0244189	Other
ENSG00000083290	ULK2	protein_coding	Q8IYT8	-0.214395	0.484969	Other
ENSG00000083307	GRHL2	protein_coding	Q6ISB3	-1.56909	NA	Other
ENSG00000083312	TNPO1	protein_coding	Q92973	-0.24102	0.13405	Other
ENSG00000083444	PLOD1	protein_coding	Q02809	0.380079	0.00297423	Common
ENSG00000083454	P2RX5	protein_coding	Q93086	-0.709679	NA	Other
ENSG00000083457	ITGAE	protein_coding	P38570	0.150057	0.544689	Other
ENSG00000083520	DIS3	protein_coding	Q9Y2L1	-0.133867	0.40119	Other
ENSG00000083535	PIBF1	protein_coding	Q8WXW3	-0.124389	0.639083	Other
ENSG00000083544	TDRD3	protein_coding	Q9H7E2	-0.0331664	0.935074	Other
ENSG00000083622	AC000111.6	antisense	#N/A	NA	NA	Other
ENSG00000083635	NUFIP1	protein_coding	Q9UHK0	0.0407016	0.893079	Other
ENSG00000083642	PDS5B	protein_coding	Q9NTI5	-0.384433	0.0158804	Other
ENSG00000083720	OXCT1	protein_coding	P55809	-0.00449498	0.989481	Other
ENSG00000083750	RRAGB	protein_coding	Q5VZM2	-0.0674934	0.862276	Other
ENSG00000083782	EPYC	protein_coding	Q99645	NA	NA	Other
ENSG00000083799	CYLD	protein_coding	Q9NQC7	0.02906	0.918415	Other
ENSG00000083807	SLC27A5	protein_coding	Q9Y2P5	0.147522	0.79688	Other
ENSG00000083812	ZNF324	protein_coding	O75467	0.534496	0.00730051	Other
ENSG00000083814	ZNF671	protein_coding	Q8TAW3	-0.134932	NA	Other
ENSG00000083817	ZNF416	protein_coding	Q9BWM5	0.128667	0.732938	Other
ENSG00000083828	ZNF586	protein_coding	Q9NXT0	-0.0715195	0.909996	Other
ENSG00000083838	ZNF446	protein_coding	Q9NWS9	0.310641	0.491707	Other
ENSG00000083844	ZNF264	protein_coding	O43296	-0.00825602	0.983395	Other
ENSG00000083845	RPS5	protein_coding	P46782	0.279373	0.00788149	Other
ENSG00000083857	FAT1	protein_coding	Q14517	-0.349016	0.023475	Other
ENSG00000083896	YTHDC1	protein_coding	Q96MU7	1.10697	0.315626	Other
ENSG00000083937	CHMP2B	protein_coding	Q9UQN3	-0.0714825	0.730806	Other
ENSG00000084070	SMAP2	protein_coding	Q8WU79	0.15122	0.421994	Other
ENSG00000084072	PPIE	protein_coding	Q9UNP9	0.200832	0.200237	Other
ENSG00000084073	ZMPSTE24	protein_coding	O75844	0.0383946	0.869307	Other
ENSG00000084090	STARD7	protein_coding	Q9NQZ5	0.0339817	0.826398	Other
ENSG00000084092	NOA1	protein_coding	Q8NC60	0.0701963	0.758495	Other
ENSG00000084093	REST	protein_coding	Q13127	-0.464363	0.028049	Other
ENSG00000084110	HAL	protein_coding	P42357	-0.303648	NA	Other
ENSG00000084112	SSH1	protein_coding	Q8WYL5	0.0395368	0.896226	Other
ENSG00000084207	GSTP1	protein_coding	P09211	0.182501	0.188831	Other
ENSG00000084234	APLP2	protein_coding	Q06481	-0.240864	0.00618894	Other
ENSG00000084444	FAM234B	protein_coding	A2RU67	-0.0757118	0.784823	Other
ENSG00000084453	SLCO1A2	protein_coding	P46721	-1.56909	NA	Other
ENSG00000084463	WBP11	protein_coding	Q9Y2W2	0.07486	0.677588	Other
ENSG00000084623	EIF3I	protein_coding	Q13347	0.173187	0.0655158	Other
ENSG00000084628	NKAIN1	protein_coding	Q4KMZ8	0.179782	0.765715	Other
ENSG00000084636	COL16A1	protein_coding	Q07092	-0.777986	NA	Other
ENSG00000084652	TXLNA	protein_coding	P40222	0.254125	0.00862866	Other
ENSG00000084674	APOB	protein_coding	P04114	NA	NA	Other
ENSG00000084676	NCOA1	protein_coding	Q15788	-0.183832	0.43986	Other
ENSG00000084693	AGBL5	protein_coding	Q8NDL9	0.1209	0.515491	Other
ENSG00000084710	EFR3B	protein_coding	Q9Y2G0	-0.386551	0.369598	Other
ENSG00000084731	KIF3C	protein_coding	O14782	-0.66343	0.00528907	Other
ENSG00000084733	RAB10	protein_coding	P61026	0.0443753	0.819439	Other
ENSG00000084734	GCKR	protein_coding	Q14397	-0.288978	NA	Other
ENSG00000084754	HADHA	protein_coding	P40939	0.0665351	0.611694	Other
ENSG00000084764	MAPRE3	protein_coding	Q9UPY8	0.114147	0.724134	Other
ENSG00000084774	CAD	protein_coding	P27708	0.328184	0.00186918	Other
ENSG00000085063	CD59	protein_coding	P13987	-0.635259	1.28385e-06	Other
ENSG00000085117	CD82	protein_coding	P27701	-0.242981	NA	Other
ENSG00000085185	BCORL1	protein_coding	Q5H9F3	-0.426705	0.00275292	Other
ENSG00000085224	ATRX	protein_coding	P46100	-0.402381	0.00849796	Other
ENSG00000085231	AK6	protein_coding	Q9Y3D8	NA	NA	Other
ENSG00000085265	FCN1	protein_coding	O00602	NA	NA	Other
ENSG00000085274	MYNN	protein_coding	Q9NPC7	0.0304102	0.936597	Other
ENSG00000085276	MECOM	protein_coding	Q03112	-0.542543	0.0191463	Other
ENSG00000085365	SCAMP1	protein_coding	O15126	-0.205591	0.371017	Other
ENSG00000085377	PREP	protein_coding	P48147	0.012661	0.961191	Other
ENSG00000085382	HACE1	protein_coding	Q8IYU2	-0.0511852	0.886091	Other
ENSG00000085415	SEH1L	protein_coding	Q96EE3	-0.205845	0.349097	Other
ENSG00000085433	WDR47	protein_coding	O94967	-0.318408	0.145271	Other
ENSG00000085449	WDFY1	protein_coding	Q8IWB7	-0.284777	0.159174	Other
ENSG00000085465	OVGP1	protein_coding	Q12889	0.0263664	0.951574	Other
ENSG00000085491	SLC25A24	protein_coding	Q6NUK1	-0.18594	0.392651	Other
ENSG00000085511	MAP3K4	protein_coding	Q9Y6R4	-0.243354	0.127199	Other
ENSG00000085514	PILRA	protein_coding	Q9UKJ1	-1.36453	NA	Other
ENSG00000085552	IGSF9	protein_coding	Q9P2J2	-0.321836	NA	Other
ENSG00000085563	ABCB1	protein_coding	P08183	-0.422297	0.147756	Other
ENSG00000085644	ZNF213	protein_coding	O14771	0.484968	0.00947444	Other
ENSG00000085662	AKR1B1	protein_coding	P15121	0.228656	0.0299305	Other
ENSG00000085719	CPNE3	protein_coding	O75131	-0.312917	0.119209	Other
ENSG00000085721	RRN3	protein_coding	Q9NYV6	-0.132499	0.855202	Other
ENSG00000085733	CTTN	protein_coding	Q14247	0.0482955	0.782496	Other
ENSG00000085741	WNT11	protein_coding	O96014	-1.2454	0.00862866	Other
ENSG00000085760	MTIF2	protein_coding	P46199	0.16597	0.294495	Other
ENSG00000085788	DDHD2	protein_coding	O94830	-0.182029	0.319207	Other
ENSG00000085831	TTC39A	protein_coding	Q5SRH9	-0.214235	0.644348	Other
ENSG00000085832	EPS15	protein_coding	P42566	-0.396387	0.0227763	Other
ENSG00000085840	ORC1	protein_coding	Q13415	0.0492251	0.790991	Other
ENSG00000085871	MGST2	protein_coding	Q99735	-0.110289	0.788291	Other
ENSG00000085872	CHERP	protein_coding	Q8IWX8	0.229183	0.0620542	Other
ENSG00000085978	ATG16L1	protein_coding	Q676U5	NA	NA	Other
ENSG00000085982	USP40	protein_coding	Q9NVE5	0.154449	0.460274	Other
ENSG00000085998	POMGNT1	protein_coding	Q8WZA1	0.019939	0.949894	Other
ENSG00000085999	RAD54L	protein_coding	Q92698	0.0175071	0.941321	Other
ENSG00000086015	MAST2	protein_coding	Q6P0Q8	0.250765	0.111229	Other
ENSG00000086061	DNAJA1	protein_coding	P31689	-0.221682	0.0431431	Other
ENSG00000086062	B4GALT1	protein_coding	P15291	0.31182	0.119981	Other
ENSG00000086065	CHMP5	protein_coding	Q9NZZ3	0.0747824	0.695071	Other
ENSG00000086102	NFX1	protein_coding	Q12986	0.205201	0.0940127	Other
ENSG00000086159	AQP6	protein_coding	Q13520	-1.31416	NA	Other
ENSG00000086189	DIMT1	protein_coding	Q9UNQ2	-0.0588121	0.789376	Other
ENSG00000086200	IPO11	protein_coding	Q9UI26	-0.224436	0.192542	Other
ENSG00000086205	FOLH1	protein_coding	Q04609	-2.13816	NA	Other
ENSG00000086232	EIF2AK1	protein_coding	Q9BQI3	0.162027	0.170525	Other
ENSG00000086288	NME8	protein_coding	Q8N427	NA	NA	Other
ENSG00000086289	EPDR1	protein_coding	Q9UM22	-0.26365	0.591885	Other
ENSG00000086300	SNX10	protein_coding	Q9Y5X0	-0.556069	0.0996741	Other
ENSG00000086475	SEPHS1	protein_coding	P49903	0.0245388	0.897619	Other
ENSG00000086504	MRPL28	protein_coding	Q13084	0.0983326	0.593104	Other
ENSG00000086506	HBQ1	protein_coding	P09105	-0.516041	0.424973	Other
ENSG00000086544	ITPKC	protein_coding	Q96DU7	0.240406	0.416341	Other
ENSG00000086548	CEACAM6	protein_coding	P40199	NA	NA	Other
ENSG00000086570	FAT2	protein_coding	Q9NYQ8	-0.400427	NA	Other
ENSG00000086589	RBM22	protein_coding	Q9NW64	0.107835	0.489205	Other
ENSG00000086598	TMED2	protein_coding	Q15363	0.698511	2.80248e-13	Other
ENSG00000086619	ERO1B	protein_coding	Q86YB8	1.32851	3.38573e-24	Other
ENSG00000086666	ZFAND6	protein_coding	Q6FIF0	-0.147044	0.402343	Other
ENSG00000086696	HSD17B2	protein_coding	P37059	-0.875617	NA	Other
ENSG00000086712	TXLNG	protein_coding	Q9NUQ3	-0.00870837	0.971522	Other
ENSG00000086717	PPEF1	protein_coding	O14829	0.833083	NA	Other
ENSG00000086730	LAT2	protein_coding	Q9GZY6	0.119539	0.873238	Other
ENSG00000086758	HUWE1	protein_coding	Q7Z6Z7	0.121803	0.269135	Other
ENSG00000086827	ZW10	protein_coding	O43264	0.318017	0.0286173	Other
ENSG00000086848	ALG9	protein_coding	Q9H6U8	0.17003	0.761577	Other
ENSG00000086967	MYBPC2	protein_coding	Q14324	-0.0259733	NA	Other
ENSG00000086991	NOX4	protein_coding	Q9NPH5	-0.875617	NA	Other
ENSG00000087008	ACOX3	protein_coding	O15254	0.0423521	0.91139	Other
ENSG00000087053	MTMR2	protein_coding	Q13614	-0.13073	0.489205	Other
ENSG00000087074	PPP1R15A	protein_coding	O75807	0.410626	4.35621e-05	Other
ENSG00000087076	HSD17B14	protein_coding	Q9BPX1	0.435865	0.562085	Other
ENSG00000087077	TRIP6	protein_coding	Q15654	0.232904	0.165065	Other
ENSG00000087085	ACHE	protein_coding	P22303	0.260143	0.61765	Other
ENSG00000087086	FTL	protein_coding	P02792	0.188069	0.0758526	Other
ENSG00000087087	SRRT	protein_coding	Q9BXP5	0.196449	0.0514526	Other
ENSG00000087088	BAX	protein_coding	Q07812	-0.0316507	0.88878	Other
ENSG00000087095	NLK	protein_coding	Q9UBE8	-0.278308	0.351309	Other
ENSG00000087111	PIGS	protein_coding	Q96S52	0.315164	0.00868545	Other
ENSG00000087116	ADAMTS2	protein_coding	O95450	-0.683127	0.228044	Other
ENSG00000087128	TMPRSS11E	protein_coding	Q9UL52	NA	NA	Other
ENSG00000087152	ATXN7L3	protein_coding	Q14CW9	0.096331	0.576835	Other
ENSG00000087157	PGS1	protein_coding	Q32NB8	0.0701042	0.782403	Other
ENSG00000087191	PSMC5	protein_coding	P62195	0.145316	0.307715	Other
ENSG00000087206	UIMC1	protein_coding	Q96RL1	0.0315337	0.871835	Other
ENSG00000087237	CETP	protein_coding	P11597	1.66574	NA	Other
ENSG00000087245	MMP2	protein_coding	P08253	-1.32954	NA	Other
ENSG00000087250	MT3	protein_coding	P25713	NA	NA	Other
ENSG00000087253	LPCAT2	protein_coding	Q7L5N7	-0.442253	0.135197	Other
ENSG00000087258	GNAO1	protein_coding	P09471	-0.253421	0.719331	Other
ENSG00000087263	OGFOD1	protein_coding	Q8N543	0.135484	0.435143	Other
ENSG00000087266	SH3BP2	protein_coding	P78314	-0.0888768	0.72727	Other
ENSG00000087269	NOP14	protein_coding	P78316	0.181867	0.11056	Other
ENSG00000087274	ADD1	protein_coding	P35611	0.0105852	0.958088	Other
ENSG00000087299	L2HGDH	protein_coding	Q9H9P8	-0.100072	0.695662	Other
ENSG00000087301	TXNDC16	protein_coding	Q9P2K2	-0.29192	0.141456	Other
ENSG00000087302	C14orf166	protein_coding	#N/A	0.201067	0.125631	Other
ENSG00000087303	NID2	protein_coding	Q14112	-0.171504	0.672628	Common
ENSG00000087338	GMCL1	protein_coding	Q96IK5	-0.0334515	0.924968	Other
ENSG00000087365	SF3B2	protein_coding	Q13435	0.321441	0.000956188	Other
ENSG00000087448	KLHL42	protein_coding	Q9P2K6	-0.101077	0.738834	Other
ENSG00000087460	GNAS	protein_coding	Q5JWF2	0.250153	0.0230392	Other
ENSG00000087470	DNM1L	protein_coding	O00429	-0.163653	0.255398	Other
ENSG00000087494	PTHLH	protein_coding	P12272	-0.920965	NA	Other
ENSG00000087495	PHACTR3	protein_coding	Q96KR7	-0.337317	NA	Other
ENSG00000087502	ERGIC2	protein_coding	Q96RQ1	-0.204426	0.398034	Other
ENSG00000087510	TFAP2C	protein_coding	Q92754	-0.0213439	0.972011	Other
ENSG00000087586	AURKA	protein_coding	O14965	-0.12295	0.375889	Other
ENSG00000087589	CASS4	protein_coding	Q9NQ75	0.0161601	NA	Other
ENSG00000087842	PIR	protein_coding	O00625	-0.134947	0.779175	Other
ENSG00000087884	AAMDC	protein_coding	Q9H7C9	-0.113744	0.831073	Other
ENSG00000087903	RFX2	protein_coding	P48378	-0.540395	0.0686884	Other
ENSG00000087995	METTL2A	protein_coding	Q96IZ6	0.106561	0.625857	Other
ENSG00000088002	SULT2B1	protein_coding	O00204	-0.470621	NA	Other
ENSG00000088035	ALG6	protein_coding	Q9Y672	-0.152499	0.506067	Basal-specific
ENSG00000088038	CNOT3	protein_coding	O75175	0.659676	0.00251729	Other
ENSG00000088053	GP6	protein_coding	Q9HCN6	NA	NA	Other
ENSG00000088179	PTPN4	protein_coding	P29074	-0.0542224	0.87684	Other
ENSG00000088205	DDX18	protein_coding	Q9NVP1	0.212553	0.118968	Other
ENSG00000088247	KHSRP	protein_coding	Q92945	0.234471	0.0256645	Other
ENSG00000088256	GNA11	protein_coding	P29992	0.272937	0.188831	Other
ENSG00000088280	ASAP3	protein_coding	Q8TDY4	NA	NA	Other
ENSG00000088298	EDEM2	protein_coding	Q9BV94	1.13779	3.88744e-14	Other
ENSG00000088305	DNMT3B	protein_coding	Q9UBC3	-0.532075	0.0062236	Other
ENSG00000088320	REM1	protein_coding	O75628	NA	NA	Other
ENSG00000088325	TPX2	protein_coding	Q9ULW0	-0.0752002	0.572762	Other
ENSG00000088340	FER1L4	transcribed_unitary_pseudogene	A9Z1Z3	-0.873374	0.163459	Other
ENSG00000088356	PDRG1	protein_coding	Q9NUG6	0.174163	0.246168	Other
ENSG00000088367	EPB41L1	protein_coding	Q9H4G0	-0.721967	0.000364645	Other
ENSG00000088386	SLC15A1	protein_coding	P46059	-1.53788	NA	Other
ENSG00000088387	DOCK9	protein_coding	Q9BZ29	-0.200833	0.364101	Other
ENSG00000088448	ANKRD10	protein_coding	Q9NXR5	-0.0213088	0.935017	Other
ENSG00000088451	TGDS	protein_coding	O95455	0.538549	0.00016922	Other
ENSG00000088538	DOCK3	protein_coding	Q8IZD9	0.334164	0.0552492	Other
ENSG00000088543	C3orf18	protein_coding	Q9UK00	-0.322934	0.590525	Other
ENSG00000088682	COQ9	protein_coding	O75208	0.213449	0.161742	Other
ENSG00000088726	TMEM40	protein_coding	Q8WWA1	0.887949	NA	Other
ENSG00000088727	KIF9	protein_coding	Q9HAQ2	0.321994	0.428177	Other
ENSG00000088756	ARHGAP28	protein_coding	Q9P2N2	-0.407351	0.512614	Other
ENSG00000088766	CRLS1	protein_coding	Q9UJA2	0.395055	0.00226545	Other
ENSG00000088782	DEFB127	protein_coding	Q9H1M4	NA	NA	Other
ENSG00000088808	PPP1R13B	protein_coding	Q96KQ4	0.257934	0.140781	Other
ENSG00000088812	ATRN	protein_coding	O75882	0.0701218	0.737736	Other
ENSG00000088826	SMOX	protein_coding	Q9NWM0	0.727199	0.00285742	Other
ENSG00000088827	SIGLEC1	protein_coding	Q9BZZ2	-1.99118	NA	Other
ENSG00000088832	FKBP1A	protein_coding	P62942	0.379232	4.76757e-05	Other
ENSG00000088833	NSFL1C	protein_coding	Q9UNZ2	0.22619	0.0634329	Other
ENSG00000088836	SLC4A11	protein_coding	Q8NBS3	0.100365	0.797805	Other
ENSG00000088854	C20orf194	protein_coding	Q5TEA3	-0.0230934	0.956302	Other
ENSG00000088876	ZNF343	protein_coding	Q6P1L6	0.217439	0.392764	Other
ENSG00000088881	EBF4	protein_coding	Q9BQW3	-0.314064	0.431445	Other
ENSG00000088882	CPXM1	protein_coding	Q96SM3	0.154373	NA	Other
ENSG00000088888	MAVS	protein_coding	Q7Z434	-0.0948692	0.560029	Other
ENSG00000088899	LZTS3	protein_coding	O60299	-0.12402	0.681149	Other
ENSG00000088926	F11	protein_coding	P03951	-0.875617	NA	Other
ENSG00000088930	XRN2	protein_coding	Q9H0D6	-0.0422894	0.81561	Other
ENSG00000088970	KIZ	protein_coding	Q2M2Z5	0.757768	4.13776e-05	Other
ENSG00000088986	DYNLL1	protein_coding	P63167	-0.0339761	0.833141	Other
ENSG00000088992	TESC	protein_coding	Q96BS2	-0.347498	0.46878	Other
ENSG00000089006	SNX5	protein_coding	Q9Y5X3	-0.0459	0.77083	Other
ENSG00000089009	RPL6	protein_coding	Q02878	0.0381464	0.785098	Other
ENSG00000089012	SIRPG	protein_coding	Q9P1W8	NA	NA	Other
ENSG00000089022	MAPKAPK5	protein_coding	Q8IW41	0.0981484	0.622118	Other
ENSG00000089041	P2RX7	protein_coding	Q99572	2.2712	NA	Other
ENSG00000089048	ESF1	protein_coding	Q9H501	-0.235283	0.107355	Other
ENSG00000089050	RBBP9	protein_coding	O75884	-0.190455	0.491707	Other
ENSG00000089053	ANAPC5	protein_coding	Q9UJX4	0.147574	0.184516	Basal-specific
ENSG00000089057	SLC23A2	protein_coding	Q9UGH3	-0.0659448	0.730806	Other
ENSG00000089060	SLC8B1	protein_coding	Q6J4K2	-0.0631117	0.898243	Other
ENSG00000089063	TMEM230	protein_coding	Q96A57	0.0665532	0.705848	Other
ENSG00000089091	DZANK1	protein_coding	Q9NVP4	0.180224	0.701607	Other
ENSG00000089094	KDM2B	protein_coding	Q8NHM5	-0.0501171	0.833846	Other
ENSG00000089101	CFAP61	protein_coding	Q8NHU2	-0.0725648	NA	Other
ENSG00000089116	LHX5	protein_coding	Q9H2C1	-0.875617	NA	Other
ENSG00000089123	TASP1	protein_coding	Q9H6P5	0.104042	0.768151	Other
ENSG00000089127	OAS1	protein_coding	P00973	NA	NA	Other
ENSG00000089154	GCN1	protein_coding	Q92616	0.169311	0.167027	Other
ENSG00000089157	RPLP0	protein_coding	P05388	0.289091	0.0012095	Other
ENSG00000089159	PXN	protein_coding	P49023	-0.171942	0.494964	Other
ENSG00000089163	SIRT4	protein_coding	Q9Y6E7	-0.115771	NA	Other
ENSG00000089169	RPH3A	protein_coding	Q9Y2J0	NA	NA	Other
ENSG00000089177	KIF16B	protein_coding	Q96L93	0.158028	0.61625	Other
ENSG00000089195	TRMT6	protein_coding	Q9UJA5	0.0299057	0.894869	Other
ENSG00000089199	CHGB	protein_coding	P05060	0.950912	0.0899844	Other
ENSG00000089220	PEBP1	protein_coding	P30086	0.108256	0.38055	Other
ENSG00000089225	TBX5	protein_coding	Q99593	NA	NA	Other
ENSG00000089234	BRAP	protein_coding	Q7Z569	-0.0260296	0.91139	Other
ENSG00000089248	ERP29	protein_coding	P30040	0.24021	0.0569751	Other
ENSG00000089250	NOS1	protein_coding	P29475	1.31239	NA	Other
ENSG00000089280	FUS	protein_coding	P35637	0.175617	0.0872271	Other
ENSG00000089289	IGBP1	protein_coding	P78318	-0.0702862	0.786235	Other
ENSG00000089327	FXYD5	protein_coding	Q96DB9	0.201808	0.519874	Other
ENSG00000089335	ZNF302	protein_coding	Q9NR11	-0.124624	0.572828	Other
ENSG00000089351	GRAMD1A	protein_coding	Q96CP6	0.223913	0.264117	Other
ENSG00000089356	FXYD3	protein_coding	Q14802	-1.43503	NA	Other
ENSG00000089472	HEPH	protein_coding	Q9BQS7	1.55059	NA	Other
ENSG00000089486	CDIP1	protein_coding	Q9H305	-0.0667008	0.937771	Other
ENSG00000089505	CMTM1	protein_coding	Q8IZ96	-0.561192	NA	Other
ENSG00000089558	KCNH4	protein_coding	Q9UQ05	-0.199204	NA	Other
ENSG00000089597	GANAB	protein_coding	Q14697	0.376959	2.38748e-05	Basal-specific
ENSG00000089639	GMIP	protein_coding	Q9P107	-0.549001	0.0938207	Other
ENSG00000089682	RBM41	protein_coding	Q96IZ5	-0.254867	0.234452	Other
ENSG00000089685	BIRC5	protein_coding	O15392	0.0627143	0.67454	Other
ENSG00000089692	LAG3	protein_coding	P18627	-1.65306	NA	Other
ENSG00000089693	MLF2	protein_coding	Q15773	0.290337	0.0162239	Other
ENSG00000089723	OTUB2	protein_coding	Q96DC9	0.897982	NA	Other
ENSG00000089737	DDX24	protein_coding	Q9GZR7	-0.281472	0.649253	Other
ENSG00000089775	ZBTB25	protein_coding	P24278	0.0490519	0.911983	Other
ENSG00000089818	NECAP1	protein_coding	Q8NC96	0.0996402	0.664328	Other
ENSG00000089820	ARHGAP4	protein_coding	P98171	0.139526	0.867688	Other
ENSG00000089847	ANKRD24	protein_coding	#N/A	0.642065	0.209119	Other
ENSG00000089876	DHX32	protein_coding	Q7L7V1	0.0434746	0.889975	Other
ENSG00000089902	RCOR1	protein_coding	Q9UKL0	-0.245421	0.171848	Other
ENSG00000089916	GPATCH2L	protein_coding	Q9NWQ4	-0.358174	0.0563274	Other
ENSG00000090006	LTBP4	protein_coding	Q8N2S1	0.156014	0.533192	Stress-activated
ENSG00000090013	BLVRB	protein_coding	P30043	-0.0337711	0.92162	Other
ENSG00000090020	SLC9A1	protein_coding	P19634	-0.0443154	0.887957	Other
ENSG00000090054	SPTLC1	protein_coding	O15269	-0.0352629	0.895621	Other
ENSG00000090060	PAPOLA	protein_coding	P51003	-0.240263	0.128677	Other
ENSG00000090061	CCNK	protein_coding	O75909	0.153777	0.625857	Other
ENSG00000090097	PCBP4	protein_coding	P57723	0.177046	0.593174	Other
ENSG00000090104	RGS1	protein_coding	Q08116	NA	NA	Other
ENSG00000090238	YPEL3	protein_coding	P61236	-0.288503	0.495914	Other
ENSG00000090263	MRPS33	protein_coding	Q9Y291	0.0747349	0.678171	Other
ENSG00000090266	NDUFB2	protein_coding	O95178	-0.0644206	0.808304	Other
ENSG00000090273	NUDC	protein_coding	Q9Y266	0.305864	0.0117319	Other
ENSG00000090316	MAEA	protein_coding	Q7L5Y9	0.287061	0.0223605	Other
ENSG00000090339	ICAM1	protein_coding	P05362	-0.547835	NA	Other
ENSG00000090372	STRN4	protein_coding	Q9NRL3	0.244195	0.040638	Stress-activated
ENSG00000090376	IRAK3	protein_coding	Q9Y616	0.840285	NA	Other
ENSG00000090382	LYZ	protein_coding	P61626	-2.05079	NA	Other
ENSG00000090402	SI	protein_coding	P14410	0.599581	NA	Other
ENSG00000090432	MUL1	protein_coding	Q969V5	0.30678	0.0788825	Other
ENSG00000090447	TFAP4	protein_coding	Q01664	0.555522	0.0122799	Other
ENSG00000090470	PDCD7	protein_coding	Q8N8D1	0.256092	0.138024	Other
ENSG00000090487	SPG21	protein_coding	Q9NZD8	0.15731	0.387981	Other
ENSG00000090512	FETUB	protein_coding	Q9UGM5	2.30078	NA	Other
ENSG00000090520	DNAJB11	protein_coding	Q9UBS4	1.72066	4.10615e-75	Other
ENSG00000090530	P3H2	protein_coding	Q8IVL5	-0.303493	0.673151	Other
ENSG00000090534	THPO	protein_coding	P40225	-1.19903	NA	Other
ENSG00000090539	CHRD	protein_coding	Q9H2X0	-0.793398	0.274422	Other
ENSG00000090554	FLT3LG	protein_coding	P49771	0.574219	NA	Other
ENSG00000090565	RAB11FIP3	protein_coding	O75154	0.820319	0.0494924	Other
ENSG00000090581	GNPTG	protein_coding	Q9UJJ9	0.308174	0.251213	Other
ENSG00000090612	ZNF268	protein_coding	Q14587	-0.0789794	0.822512	Other
ENSG00000090615	GOLGA3	protein_coding	Q08378	0.85194	3.06349e-12	Other
ENSG00000090621	PABPC4	protein_coding	Q13310	0.0728537	0.58686	Other
ENSG00000090659	CD209	protein_coding	Q9NNX6	-0.875617	NA	Other
ENSG00000090661	CERS4	protein_coding	Q9HA82	-0.233185	0.635955	Other
ENSG00000090674	MCOLN1	protein_coding	Q9GZU1	0.655658	0.000111124	Other
ENSG00000090686	USP48	protein_coding	Q86UV5	-0.117652	0.47619	Other
ENSG00000090776	EFNB1	protein_coding	P98172	0.0638884	0.839975	Other
ENSG00000090857	PDPR	protein_coding	Q8NCN5	0.145271	0.505805	Other
ENSG00000090861	AARS	protein_coding	P49588	0.642857	9.56213e-16	Basal-specific
ENSG00000090863	GLG1	protein_coding	Q92896	0.0855438	0.540085	Common
ENSG00000090889	KIF4A	protein_coding	O95239	-0.0417296	0.832295	Other
ENSG00000090905	TNRC6A	protein_coding	Q8NDV7	-0.139255	0.407732	Other
ENSG00000090924	PLEKHG2	protein_coding	Q9H7P9	-0.669551	0.000580328	Other
ENSG00000090932	DLL3	protein_coding	Q9NYJ7	0.186744	0.658424	Basal-specific
ENSG00000090971	NAT14	protein_coding	Q8WUY8	0.103936	0.715862	Other
ENSG00000090975	PITPNM2	protein_coding	Q9BZ72	-0.107993	0.833524	Other
ENSG00000090989	EXOC1	protein_coding	Q9NV70	-0.0317031	0.923724	Other
ENSG00000091009	RBM27	protein_coding	Q9P2N5	0.0862546	0.779451	Other
ENSG00000091010	POU4F3	protein_coding	Q15319	3.27795	NA	Other
ENSG00000091039	OSBPL8	protein_coding	Q9BZF1	-0.280751	0.257412	Other
ENSG00000091073	DTX2	protein_coding	Q86UW9	0.0221222	0.974167	Other
ENSG00000091106	NLRC4	protein_coding	Q9NPP4	-0.134442	0.883466	Other
ENSG00000091127	PUS7	protein_coding	Q96PZ0	-0.158923	0.377838	Other
ENSG00000091128	LAMB4	protein_coding	A4D0S4	1.66928	NA	Other
ENSG00000091129	NRCAM	protein_coding	Q92823	-0.500523	0.086624	Basal-specific
ENSG00000091136	LAMB1	protein_coding	P07942	-0.586032	5.9e-05	Common
ENSG00000091137	SLC26A4	protein_coding	O43511	-0.922079	NA	Other
ENSG00000091138	SLC26A3	protein_coding	P40879	0.378357	NA	Other
ENSG00000091140	DLD	protein_coding	P09622	-0.0223619	0.92066	Other
ENSG00000091157	WDR7	protein_coding	Q9Y4E6	0.0876886	0.788075	Other
ENSG00000091164	TXNL1	protein_coding	O43396	0.366339	0.0100013	Other
ENSG00000091181	IL5RA	protein_coding	Q01344	1.19832	NA	Other
ENSG00000091262	ABCC6	protein_coding	O95255	-0.875617	NA	Other
ENSG00000091317	CMTM6	protein_coding	Q9NX76	-0.346747	0.0211242	Other
ENSG00000091409	ITGA6	protein_coding	P23229	-0.738097	0.000343678	Other
ENSG00000091428	RAPGEF4	protein_coding	Q8WZA2	-0.436046	0.336886	Other
ENSG00000091436	AC013461.1	protein_coding	#N/A	-0.246597	0.237421	Other
ENSG00000091482	SMPX	protein_coding	Q9UHP9	3.27795	NA	Other
ENSG00000091483	FH	protein_coding	P07954	0.180944	0.158246	Other
ENSG00000091490	SEL1L3	protein_coding	Q68CR1	0.0845028	0.831438	Other
ENSG00000091513	TF	protein_coding	P02787	-0.21023	NA	Other
ENSG00000091527	CDV3	protein_coding	Q9UKY7	0.175565	0.182169	Other
ENSG00000091536	MYO15A	protein_coding	Q9UKN7	-0.00954042	NA	Other
ENSG00000091542	ALKBH5	protein_coding	Q6P6C2	0.243488	0.0652511	Other
ENSG00000091583	APOH	protein_coding	P02749	NA	NA	Other
ENSG00000091592	NLRP1	protein_coding	Q9C000	0.119626	0.795821	Other
ENSG00000091622	PITPNM3	protein_coding	Q9BZ71	-0.374154	0.429808	Other
ENSG00000091640	SPAG7	protein_coding	O75391	0.247297	0.159955	Other
ENSG00000091651	ORC6	protein_coding	Q9Y5N6	-0.0443988	0.808928	Other
ENSG00000091656	ZFHX4	protein_coding	Q86UP3	-0.72393	1.07672e-05	Other
ENSG00000091664	SLC17A6	protein_coding	Q9P2U8	NA	NA	Other
ENSG00000091704	CPA1	protein_coding	P15085	1.0073	NA	Other
ENSG00000091732	ZC3HC1	protein_coding	Q86WB0	0.0843562	0.702689	Other
ENSG00000091831	ESR1	protein_coding	P03372	-0.552463	NA	Other
ENSG00000091844	RGS17	protein_coding	Q9UGC6	-0.626412	0.0235246	Other
ENSG00000091879	ANGPT2	protein_coding	O15123	-1.54317	NA	Other
ENSG00000091947	TMEM101	protein_coding	Q96IK0	0.164352	0.39247	Other
ENSG00000091972	CD200	protein_coding	P41217	NA	NA	Other
ENSG00000091986	CCDC80	protein_coding	Q76M96	-0.519694	0.26934	Other
ENSG00000092009	CMA1	protein_coding	P23946	-0.762263	NA	Other
ENSG00000092010	PSME1	protein_coding	Q06323	0.0640117	0.815202	Other
ENSG00000092020	PPP2R3C	protein_coding	Q969Q6	-0.12558	0.667196	Other
ENSG00000092036	HAUS4	protein_coding	Q9H6D7	-0.0218448	0.968292	Other
ENSG00000092051	JPH4	protein_coding	Q96JJ6	-0.486471	NA	Other
ENSG00000092054	MYH7	protein_coding	P12883	-0.253217	NA	Other
ENSG00000092067	CEBPE	protein_coding	Q15744	NA	NA	Other
ENSG00000092068	SLC7A8	protein_coding	Q9UHI5	-0.0765321	0.888126	Other
ENSG00000092094	OSGEP	protein_coding	Q9NPF4	0.290568	0.0387394	Other
ENSG00000092096	SLC22A17.1	protein_coding	#N/A	0.370377	0.627627	Other
ENSG00000092098	RNF31	protein_coding	Q96EP0	0.408326	0.0483877	Other
ENSG00000092108	SCFD1	protein_coding	Q8WVM8	0.319198	0.0278388	Other
ENSG00000092140	G2E3	protein_coding	Q7L622	-0.31678	0.145271	Other
ENSG00000092148	HECTD1	protein_coding	Q9ULT8	-0.171335	0.384276	Other
ENSG00000092199	HNRNPC	protein_coding	P07910	0.0616939	0.601628	Other
ENSG00000092200	RPGRIP1	protein_coding	Q96KN7	-0.983375	NA	Other
ENSG00000092201	SUPT16H	protein_coding	Q9Y5B9	-0.139183	0.234382	Other
ENSG00000092203	TOX4	protein_coding	O94842	0.128149	0.409254	Other
ENSG00000092208	GEMIN2	protein_coding	O14893	0.0916269	0.677098	Other
ENSG00000092295	TGM1	protein_coding	P22735	-0.312661	0.655062	Other
ENSG00000092330	TINF2	protein_coding	Q9BSI4	0.0471263	0.876159	Other
ENSG00000092345	DAZL	protein_coding	Q92904	NA	NA	Other
ENSG00000092377	TBL1Y	protein_coding	Q9BQ87	NA	NA	Other
ENSG00000092421	SEMA6A	protein_coding	Q9H2E6	-0.293262	0.171583	Other
ENSG00000092439	TRPM7	protein_coding	Q96QT4	-0.356802	0.103966	Other
ENSG00000092445	TYRO3	protein_coding	Q06418	-0.0812183	0.765351	Other
ENSG00000092470	WDR76	protein_coding	Q9H967	-0.145719	0.476077	Other
ENSG00000092529	CAPN3	protein_coding	P20807	-1.3175	NA	Other
ENSG00000092531	SNAP23	protein_coding	O00161	-0.0433908	0.903205	Other
ENSG00000092607	TBX15	protein_coding	Q96SF7	-2.04811	NA	Other
ENSG00000092621	PHGDH	protein_coding	O43175	0.578283	2.48037e-08	Other
ENSG00000092758	COL9A3	protein_coding	Q14050	-0.802525	NA	Other
ENSG00000092820	EZR	protein_coding	P15311	-0.197933	0.103695	Other
ENSG00000092841	MYL6	protein_coding	P60660	-0.0568907	0.779139	Other
ENSG00000092847	AGO1	protein_coding	Q9UL18	-0.470156	0.00153221	Other
ENSG00000092850	TEKT2	protein_coding	Q9UIF3	-0.115182	NA	Other
ENSG00000092853	CLSPN	protein_coding	Q9HAW4	-0.278597	0.0516923	Other
ENSG00000092871	RFFL	protein_coding	Q8WZ73	-0.0850803	0.888126	Other
ENSG00000092929	UNC13D	protein_coding	Q70J99	0.305606	NA	Other
ENSG00000092931	MFSD11	protein_coding	O43934	0.158701	0.521563	Other
ENSG00000092964	DPYSL2	protein_coding	Q16555	-0.73759	0.00176324	Other
ENSG00000092969	TGFB2	protein_coding	P61812	-0.0532242	NA	Other
ENSG00000092978	GPATCH2	protein_coding	Q9NW75	-0.036535	0.90072	Other
ENSG00000093000	NUP50	protein_coding	Q9UKX7	-0.120598	0.416217	Other
ENSG00000093009	CDC45	protein_coding	O75419	0.339275	0.000466878	Basal-specific
ENSG00000093010	COMT	protein_coding	P21964	0.161378	0.343376	Other
ENSG00000093072	CECR1	protein_coding	#N/A	0.327401	NA	Other
ENSG00000093100	XXbac-B461K10.4	processed_transcript	#N/A	1.55059	NA	Other
ENSG00000093134	VNN3	protein_coding	Q9NY84	-0.875617	NA	Other
ENSG00000093144	ECHDC1	protein_coding	Q9NTX5	0.112239	0.55656	Other
[truncated: 55,993 more rows]

## Sheet: mRNA overlap
Ensemble Gene ID	Gene name	UniprotID	Log2 (ERM Enrich Tg/Basal)	P-adj (ERM Enrich Tg/Basal)	Log2 (mRNA Tg/Basal)	P-adj (mRNA Tg/Basal)	Dynamic type
ENSG00000023318	ERP44	Q9BS26	0.522202	0.00827197	0.719166	4.77263e-12	Common
ENSG00000027847	B4GALT7	Q9UBV7	0.818928	1.51046e-05	0.877968	4.22317e-08	Stress-activated
ENSG00000038427	VCAN	P13611	-0.861517	6.50268e-11	-1.34168	1.61901e-13	Basal-specific
ENSG00000044574	HSPA5	P11021	2.6696	5.37241e-93	2.94118	0	Common
ENSG00000049449	RCN1	Q15293	0.303778	0.0574968	0.55714	9.59738e-10	Basal-specific
ENSG00000052749	RRP12	Q5JTH9	0.203643	0.186314	0.633988	3.38819e-11	Common
ENSG00000058262	SEC61A1	P61619	1.15489	4.24786e-20	1.43319	3.76704e-69	Common
ENSG00000065485	PDIA5	Q14554	0.86673	7.17094e-09	1.25908	3.16622e-22	Basal-specific
ENSG00000070081	NUCB2	P80303	0.51208	0.054069	1.15848	7.92378e-28	Basal-specific
ENSG00000071242	RPS6KA2	Q15349	0.927892	2.19905e-05	0.752853	4.43404e-05	Stress-activated
ENSG00000074181	NOTCH3	Q9UM47	-0.812727	1.51326e-05	-1.34276	1.25542e-13	Basal-specific
ENSG00000078808	SDF4	Q9BRK5	0.268002	0.10128	0.695953	1.06404e-09	Stress-activated
ENSG00000081479	LRP2	P98164	-0.919025	4.82861e-11	-1.27409	6.97521e-08	Stress-activated
ENSG00000090861	AARS	P49588	0.341048	0.0269254	0.642857	9.56213e-16	Basal-specific
ENSG00000091136	LAMB1	P07942	-0.745494	3.28688e-08	-0.586032	5.9e-05	Common
ENSG00000103512	NOMO1	Q15155	0.716167	0.628156	0.902182	0.00814661	Stress-activated
ENSG00000104368	PLAT	P00750	-0.628738	8.10155e-06	-1.25204	2.34583e-19	Basal-specific
ENSG00000104635	SLC39A14	Q15043	0.480704	0.00132045	0.914395	1.39572e-19	Basal-specific
ENSG00000104805	NUCB1	Q02818	0.219979	0.313227	0.788588	2.65885e-13	Common
ENSG00000105281	SLC1A5	Q15758	0.0975934	0.6784	0.7255	1.40463e-13	Common
ENSG00000106397	PLOD3	O60568	-0.103771	0.643317	0.522418	0.000309191	Basal-specific
ENSG00000107731	UNC5B	Q8IZJ1	1.1577	6.14534e-16	1.09544	1.68617e-20	Stress-activated
ENSG00000115275	MOGS	Q13724	-0.258762	0.123805	0.689611	8.64516e-07	Common
ENSG00000115461	IGFBP5	P24593	-0.924807	8.74141e-05	-1.00011	8.47803e-06	Basal-specific
ENSG00000116691	MIIP	Q5JXC2	0.324616	0.10253	0.547706	0.00428476	Stress-activated
ENSG00000116962	NID1	P14543	-0.740136	1.23344e-06	-0.542338	9.96468e-08	Common
ENSG00000119004	CYP20A1	Q6UW02	-0.0368991	0.908446	0.608442	0.0110856	Basal-specific
ENSG00000119777	TMEM214	Q6NUQ4	0.859189	4.20169e-10	1.27871	3.16997e-35	Basal-specific
ENSG00000120725	SIL1	Q9H173	0.169608	0.637326	0.631322	0.000592741	Basal-specific
ENSG00000124783	SSR1	P43307	0.690968	0.00506938	1.05415	2.95167e-31	Common
ENSG00000125844	RRBP1	Q9P2E9	0.587593	0.0153821	1.29009	2.83331e-33	Stress-activated
ENSG00000127022	CANX	P27824	0.187359	0.225171	0.902083	2.3603e-27	Basal-specific
ENSG00000129128	SPCS3	P61009	0.659491	6.74306e-10	0.539378	8.40797e-05	Stress-activated
ENSG00000130733	YIPF2	Q9BWQ6	0.715676	8.24598e-06	0.906532	1.86535e-10	Stress-activated
ENSG00000132205	EMILIN2	Q9BXX0	-0.217614	0.458063	0.587074	0.0046869	Basal-specific
ENSG00000132781	MUTYH	Q9UIF7	1.05495	3.4049e-07	0.564544	0.0154592	Stress-activated
ENSG00000133313	CNDP2	Q96KP4	-0.00716788	0.978447	0.501848	0.000693987	Basal-specific
ENSG00000134910	STT3A	P46977	0.384157	0.00947476	0.828184	1.83263e-29	Basal-specific
ENSG00000135506	OS9	Q13438	-0.350655	0.00453612	0.684737	1.82113e-10	Common
ENSG00000136026	CKAP4	Q07065	0.672944	8.40603e-08	1.22296	8.31429e-36	Common
ENSG00000136731	UGGT1	Q9NYU2	0.31109	0.0302077	0.545317	2.56606e-09	Basal-specific
ENSG00000139219	COL2A1	P02458	-0.568796	0.00148286	-0.593315	0.00301486	Common
ENSG00000139514	SLC7A1	P30825	0.68657	2.02298e-10	0.919627	4.35296e-30	Common
ENSG00000141756	FKBP10	Q96AY3	0.121335	0.503168	0.647259	3.63964e-08	Basal-specific
ENSG00000142186	SCYL1	Q96KG9	0.427137	0.000519746	0.899651	1.30984e-14	Basal-specific
ENSG00000142627	EPHA2	P29317	0.0436838	0.866577	-0.52089	0.00448575	Basal-specific
ENSG00000147852	VLDLR	P98155	0.927159	0.000132777	0.674964	0.0255185	Stress-activated
ENSG00000149150	SLC43A1	O75387	1.18585	5.88019e-14	0.763199	7.99734e-05	Stress-activated
ENSG00000150471	ADGRL3	Q9HAR2	-0.540915	0.0226029	-0.72178	0.0273778	Basal-specific
ENSG00000150893	FREM2	Q5SZK8	-0.933997	2.29491e-10	-1.00796	0.000610453	Common
ENSG00000151012	SLC7A11	Q9UPY5	1.79762	1.30879e-27	1.53594	1.08878e-27	Stress-activated
ENSG00000155304	HSPA13	P48723	0.900865	1.5116e-15	0.866701	2.22253e-09	Stress-activated
ENSG00000155660	PDIA4	P13667	2.14108	4.51358e-53	3.00258	0	Basal-specific
ENSG00000156140	ADAMTS3	O15072	-0.390555	0.0814547	-0.825124	0.0145137	Basal-specific
ENSG00000157514	TSC22D3	Q99576	0.716287	1.72412e-08	0.797273	1.43387e-27	Basal-specific
ENSG00000157637	SLC38A10	Q9HBR0	0.624888	0.000114843	0.540431	0.000410313	Stress-activated
ENSG00000162298	SYVN1	Q86TM6	1.59265	1.81244e-25	1.62698	9.48213e-49	Stress-activated
ENSG00000162407	PLPP3	O14495	-0.767445	1.4462e-08	-0.668529	0.0182085	Basal-specific
ENSG00000163902	RPN1	P04843	0.399593	0.00162549	0.882553	5.46699e-31	Basal-specific
ENSG00000164307	ERAP1	Q9NZ08	0.499489	0.0372	0.920294	0.000195622	Common
ENSG00000164896	FASTK	Q14296	0.881072	2.32801e-06	0.690553	8.39491e-08	Stress-activated
ENSG00000166598	HSP90B1	P14625	0.993289	3.61334e-08	1.86858	4.03658e-156	Basal-specific
ENSG00000169359	SLC33A1	O00400	1.16425	4.85741e-09	1.04377	6.91762e-16	Stress-activated
ENSG00000170522	ELOVL6	Q9H5J4	-0.139649	0.615528	-0.722582	9.28393e-06	Common
ENSG00000171246	NPTX1	Q15818	0.0437399	0.870313	-0.650038	2.5605e-07	Stress-activated
ENSG00000174437	ATP2A2	P16615	0.478763	2.89808e-05	0.794969	4.75584e-23	Stress-activated
ENSG00000175467	SART1	O43290	-0.29519	0.0735633	0.573272	5.11339e-07	Basal-specific
ENSG00000179218	CALR	P27797	0.592691	2.61814e-05	1.40151	6.96732e-80	Basal-specific
ENSG00000181104	F2R	P25116	-0.570783	0.0150304	-0.65371	0.00358215	Basal-specific
ENSG00000183853	KIRREL	Q96J84	-0.626087	0.000469806	-0.574637	0.00113598	Basal-specific
ENSG00000184164	CRELD2	Q6UXH1	1.32886	3.66418e-17	2.20738	1.47217e-84	Basal-specific
ENSG00000184432	COPB2	P35606	0.265373	0.137507	0.512993	2.00219e-07	Basal-specific
ENSG00000185008	ROBO2	Q9HCK4	-0.7122	0.00190586	-0.858716	0.0281237	Basal-specific
ENSG00000187498	COL4A1	P02462	-0.840897	2.15286e-06	-0.806078	5.44408e-05	Common
ENSG00000196517	SLC6A9	P48067	2.05537	8.74942e-39	2.34792	9.76098e-52	Stress-activated
ENSG00000196562	SULF2	Q8IWU5	-0.637515	0.000600994	-0.689132	1.40546e-05	Basal-specific
ENSG00000196950	SLC39A10	Q9ULF5	-1.29125	3.3143e-22	-0.583974	0.000342031	Basal-specific
ENSG00000214160	ALG3	Q92685	0.316958	0.10603	0.507415	0.000597527	Stress-activated
ENSG00000244038	DDOST	P39656	0.107858	0.58274	0.708566	1.17197e-15	Basal-specific

## Sheet: ER proteome overlap
Ensemble Gene ID	Gene name	UniprotID	Protein name	Log2 (ERM Enrich Tg/Basal)	Log2 (ER proteome Tg/Basal)	Dynamic type
ENSG00000005007	UPF1	Q92900	RENT1	-0.962111	-0.0305851	Basal-specific
ENSG00000007402	CACNA2D2	Q9NY47	CA2D2	-1.00498	-0.625521	Basal-specific
ENSG00000023318	ERP44	Q9BS26	ERP44	0.522202	-0.302771	Common
ENSG00000038427	VCAN	P13611	CSPG2	-0.861517	1.38346	Basal-specific
ENSG00000044574	HSPA5	P11021	BIP	2.6696	-0.326854	Common
ENSG00000046604	DSG2	Q14126	DSG2	-0.42621	1.82585	Basal-specific
ENSG00000049323	LTBP1	Q14766	LTBP1	-0.18357	-0.270919	Common
ENSG00000049449	RCN1	Q15293	RCN1	0.303778	1.7428	Basal-specific
ENSG00000058262	SEC61A1	P61619	S61A1	1.15489	-0.724272	Common
ENSG00000065485	PDIA5	Q14554	PDIA5	0.86673	-0.421899	Basal-specific
ENSG00000070081	NUCB2	P80303	NUCB2	0.51208	-0.676487	Basal-specific
ENSG00000072682	P4HA2	O15460	P4HA2	-0.0709698	-0.930438	Basal-specific
ENSG00000073060	SCARB1	Q8WTV0	SCRB1	-0.313769	-0.464847	Common
ENSG00000076716	GPC4	O75487	GPC4	-0.494344	-0.101674	Common
ENSG00000076924	XAB2	Q9HCS7	SYF1	-0.00121552	0.0848687	Basal-specific
ENSG00000078808	SDF4	Q9BRK5	CAB45	0.268002	0.338087	Stress-activated
ENSG00000083444	PLOD1	Q02809	PLOD1	-0.199359	-0.640859	Common
ENSG00000089597	GANAB	Q14697	GANAB	-0.00714847	-0.318603	Basal-specific
ENSG00000090861	AARS	P49588	SYAC	0.341048	-0.16496	Basal-specific
ENSG00000090863	GLG1	Q92896	GSLG1	-0.359851	-0.0904417	Common
ENSG00000091136	LAMB1	P07942	LAMB1	-0.745494	-0.571478	Common
ENSG00000096384	HSP90AB1	P08238	HS90B	-1.05436	-0.224841	Basal-specific
ENSG00000100242	SUN2	Q9UH99	SUN2	-0.0855033	-0.488072	Basal-specific
ENSG00000100297	MCM5	P33992	MCM5	-0.583094	-0.016762	Basal-specific
ENSG00000100401	RANGAP1	P46060	RAGP1	-0.508181	-0.2079	Basal-specific
ENSG00000104805	NUCB1	Q02818	NUCB1	0.219979	-0.289252	Common
ENSG00000104853	CLPTM1	O96005	CLPT1	-0.521781	-0.660672	Stress-activated
ENSG00000105281	SLC1A5	Q15758	AAAT	0.0975934	0.547161	Common
ENSG00000106397	PLOD3	O60568	PLOD3	-0.103771	-0.423721	Basal-specific
ENSG00000107798	LIPA	P38571	LICH	0.0315267	-0.687959	Basal-specific
ENSG00000108424	KPNB1	Q14974	IMB1	-0.820747	-0.120916	Basal-specific
ENSG00000108679	LGALS3BP	Q08380	LG3BP	0.312534	-0.914436	Stress-activated
ENSG00000108784	NAGLU	P54802	ANAG	-0.193706	-0.480483	Basal-specific
ENSG00000109472	CPE	P16870	CBPE	-0.254854	0.962128	Basal-specific
ENSG00000109586	GALNT7	Q86SF2	GALT7	-0.792895	-0.316094	Basal-specific
ENSG00000110811	P3H3	Q8IVL6	P3H3	0.350217	-0.75057	Stress-activated
ENSG00000115275	MOGS	Q13724	MOGS	-0.258762	-0.294109	Common
ENSG00000116962	NID1	P14543	NID1	-0.740136	1.18466	Common
ENSG00000118705	RPN2	P04844	RPN2	-0.113863	-0.882581	Basal-specific
ENSG00000120725	SIL1	Q9H173	SIL1	0.169608	-0.769583	Basal-specific
ENSG00000123739	PLA2G12A	Q9BZM1	PG12A	0.409741	-0.540033	Stress-activated
ENSG00000127022	CANX	P27824	CALX	0.187359	1.89246	Basal-specific
ENSG00000127463	EMC1	Q8N766	EMC1	-0.258608	-1.02819	Common
ENSG00000129103	SUMF2	Q8NBJ7	SUMF2	-0.249891	-1.16459	Basal-specific
ENSG00000129128	SPCS3	P61009	SPCS3	0.659491	-1.00276	Stress-activated
ENSG00000130175	PRKCSH	P14314	GLU2B	-0.855168	1.43217	Basal-specific
ENSG00000132182	NUP210	Q8TEM1	PO210	-0.144893	0.0265823	Common
ENSG00000132382	MYBBP1A	Q9BQG0	MBB1A	-0.341708	-0.0120048	Common
ENSG00000134762	DSC3	Q14574	DSC3	-0.132576	1.37885	Common
ENSG00000134871	COL4A2	P08572	CO4A2	-0.821822	-0.326556	Basal-specific
ENSG00000134910	STT3A	P46977	STT3A	0.384157	-0.791889	Basal-specific
ENSG00000135506	OS9	Q13438	OS9	-0.350655	-0.911311	Common
ENSG00000136026	CKAP4	Q07065	CKAP4	0.672944	-0.788464	Common
ENSG00000136731	UGGT1	Q9NYU2	UGGG1	0.31109	-0.429727	Basal-specific
ENSG00000138829	FBN2	P35556	FBN2	-0.234088	0.133515	Common
ENSG00000139921	TMX1	Q9H3N1	TMX1	-0.570271	-0.595047	Basal-specific
ENSG00000141756	FKBP10	Q96AY3	FKB10	0.121335	1.12346	Basal-specific
ENSG00000142156	COL6A1	P12109	CO6A1	-0.415	-1.4474	Common
ENSG00000142192	APP	P05067	A4	-0.615195	-0.672165	Basal-specific
ENSG00000142892	PIGK	Q92643	GPI8	0.169952	-0.145437	Common
ENSG00000143641	GALNT2	Q10471	GALT2	-0.594494	-0.0458637	Basal-specific
ENSG00000143643	TTC13	Q8NBP0	TTC13	-0.38653	-0.814935	Basal-specific
ENSG00000143815	LBR	Q14739	LBR	-0.653775	-0.166783	Basal-specific
ENSG00000149257	SERPINH1	P50454	SERPH	0.017786	-0.389029	Basal-specific
ENSG00000151176	PLBD2	Q8NHP8	PLBL2	-0.316919	-0.950171	Basal-specific
ENSG00000151694	ADAM17	P78536	ADA17	0.249663	-0.752132	Stress-activated
ENSG00000153132	CLGN	O14967	CLGN	0.00464892	1.38167	Basal-specific
ENSG00000154305	MIA3	Q5JRA6	TGO1	0.206237	-0.269238	Basal-specific
ENSG00000154734	ADAMTS1	Q9UHI8	ATS1	0.161161	1.57346	Basal-specific
ENSG00000155304	HSPA13	P48723	HSP13	0.900865	-0.125622	Stress-activated
ENSG00000155660	PDIA4	P13667	PDIA4	2.14108	-0.721672	Basal-specific
ENSG00000163399	ATP1A1	P05023	AT1A1	-0.601672	-0.523409	Basal-specific
ENSG00000163430	FSTL1	Q12841	FSTL1	-0.29041	-0.50144	Basal-specific
ENSG00000163902	RPN1	P04843	RPN1	0.399593	-0.136495	Basal-specific
ENSG00000163956	LRPAP1	P30533	AMRP	-0.494782	-1.27308	Basal-specific
ENSG00000164307	ERAP1	Q9NZ08	ERAP1	0.499489	-0.777517	Common
ENSG00000165282	PIGO	Q8TEQ8	PIGO	-0.26506	-0.366535	Common
ENSG00000165661	QSOX2	Q6ZRP7	QSOX2	-0.0654894	-0.354894	Common
ENSG00000166598	HSP90B1	P14625	ENPL	0.993289	-0.889199	Basal-specific
ENSG00000169919	GUSB	P08236	BGLR	-0.0974429	-0.667081	Basal-specific
ENSG00000170558	CDH2	P19022	CADH2	-0.526813	2.25374	Basal-specific
ENSG00000171603	CLSTN1	O94985	CSTN1	-0.418609	1.29547	Common
ENSG00000172037	LAMB2	P55268	LAMB2	-0.0444266	0.428461	Common
ENSG00000174437	ATP2A2	P16615	AT2A2	0.478763	-0.211009	Stress-activated
ENSG00000174684	B4GAT1	O43505	B4GA1	-0.567056	-0.0315455	Basal-specific
ENSG00000175467	SART1	O43290	SNUT1	-0.29519	-0.166092	Basal-specific
ENSG00000179218	CALR	P27797	CALR	0.592691	1.49021	Basal-specific
ENSG00000182871	COL18A1	P39060	COIA1	-0.311303	-0.589966	Basal-specific
ENSG00000184164	CRELD2	Q6UXH1	CREL2	1.32886	0.688828	Basal-specific
ENSG00000184432	COPB2	P35606	COPB2	0.265373	-0.139885	Basal-specific
ENSG00000197081	IGF2R	P11717	MPRI	-0.310359	0.0518151	Basal-specific
ENSG00000197746	PSAP	P07602	SAP	-0.162596	-1.03806	Basal-specific
ENSG00000198231	DDX42	Q86XP3	DDX42	-0.39557	-0.0881393	Basal-specific
ENSG00000198732	SMOC1	Q9H4F8	SMOC1	-0.322711	1.31146	Basal-specific
ENSG00000244038	DDOST	P39656	OST48	0.107858	-0.403732	Basal-specific

## Sheet: MRF overlap
Ensemble Gene ID	Gene name	UniprotID	Protein name	Log2 (ERM Enrich Tg/Basal)	Log2 (MRF Tg/Basal)	Dynamic type
ENSG00000023318	ERP44	Q9BS26	ERP44	0.522202	-1.05987	Common
ENSG00000044574	HSPA5	P11021	BIP	2.6696	1.86863	Common
ENSG00000049449	RCN1	Q15293	RCN1	0.303778	-0.882371	Basal-specific
ENSG00000058262	SEC61A1	P61619	S61A1	1.15489	-0.288936	Common
ENSG00000065485	PDIA5	Q14554	PDIA5	0.86673	-0.363102	Basal-specific
ENSG00000070081	NUCB2	P80303	NUCB2	0.51208	-0.583324	Basal-specific
ENSG00000072682	P4HA2	O15460	P4HA2	-0.0709698	-0.405829	Basal-specific
ENSG00000077942	FBLN1	P23142	FBLN2	0.0325149	-1.58186	Common
ENSG00000078808	SDF4	Q9BRK5	CAB45	0.268002	-0.870907	Stress-activated
ENSG00000083444	PLOD1	Q02809	PLOD1	-0.199359	-0.58275	Common
ENSG00000089597	GANAB	Q14697	GANAB	-0.00714847	-0.843419	Basal-specific
ENSG00000090863	GLG1	Q92896	GSLG1	-0.359851	-0.547133	Common
ENSG00000091136	LAMB1	P07942	LAMB1	-0.745494	-1.24036	Common
ENSG00000096384	HSP90AB1	P08238	HS90B	-1.05436	-0.604851	Basal-specific
ENSG00000100242	SUN2	Q9UH99	SUN2	-0.0855033	-0.0714259	Basal-specific
ENSG00000103512	NOMO1	Q15155	NOMO1	0.716167	-0.602945	Stress-activated
ENSG00000104805	NUCB1	Q02818	NUCB1	0.219979	0.0684536	Common
ENSG00000104853	CLPTM1	O96005	CLPT1	-0.521781	-0.88245	Stress-activated
ENSG00000106397	PLOD3	O60568	PLOD3	-0.103771	0.125599	Basal-specific
ENSG00000108679	LGALS3BP	Q08380	LG3BP	0.312534	-0.669744	Stress-activated
ENSG00000108797	CNTNAP1	P78357	CNTP1	0.441886	0.334794	Stress-activated
ENSG00000109586	GALNT7	Q86SF2	GALT7	-0.792895	-0.974577	Basal-specific
ENSG00000109861	CTSC	P53634	CATC	-0.99351	-0.882315	Basal-specific
ENSG00000113083	LOX	P28300	LYOX	1.07398	-0.673153	Stress-activated
ENSG00000115275	MOGS	Q13724	MOGS	-0.258762	-0.0993355	Common
ENSG00000115380	EFEMP1	Q12805	FBLN3	-0.662505	-1.42582	Basal-specific
ENSG00000115486	GGCX	P38435	VKGC	-0.409178	0.412541	Basal-specific
ENSG00000118705	RPN2	P04844	RPN2	-0.113863	-0.495107	Basal-specific
ENSG00000120725	SIL1	Q9H173	SIL1	0.169608	-0.255784	Basal-specific
ENSG00000127022	CANX	P27824	CALX	0.187359	-0.943138	Basal-specific
ENSG00000127463	EMC1	Q8N766	EMC1	-0.258608	-0.991738	Common
ENSG00000129128	SPCS3	P61009	SPCS3	0.659491	0.155583	Stress-activated
ENSG00000130175	PRKCSH	P14314	GLU2B	-0.855168	-0.442231	Basal-specific
ENSG00000132182	NUP210	Q8TEM1	PO210	-0.144893	-1.30026	Common
ENSG00000134013	LOXL2	Q9Y4K0	LOXL2	-0.354533	-1.2349	Common
ENSG00000134153	EMC7	Q9NPA0	EMC7	0.00679259	-0.814306	Stress-activated
ENSG00000134250	NOTCH2	Q04721	NOC2	-0.690866	-1.37032	Common
ENSG00000134871	COL4A2	P08572	CO4A2	-0.821822	-0.332171	Basal-specific
ENSG00000134910	STT3A	P46977	STT3A	0.384157	-1.21266	Basal-specific
ENSG00000135506	OS9	Q13438	OS9	-0.350655	-0.293773	Common
ENSG00000136026	CKAP4	Q07065	CKAP4	0.672944	-1.40568	Common
ENSG00000136731	UGGT1	Q9NYU2	UGGG1	0.31109	-0.813016	Basal-specific
ENSG00000138829	FBN2	P35556	FBN2	-0.234088	-0.88999	Common
ENSG00000139921	TMX1	Q9H3N1	TMX1	-0.570271	-1.19391	Basal-specific
ENSG00000140092	FBLN5	Q9UBX5	FBLN5	-0.565228	-1.25233	Basal-specific
ENSG00000141756	FKBP10	Q96AY3	FKB10	0.121335	-1.25485	Basal-specific
ENSG00000142192	APP	P05067	A4	-0.615195	-0.122118	Basal-specific
ENSG00000142798	HSPG2	P98160	PGBM	-0.328198	-0.856339	Basal-specific
ENSG00000142892	PIGK	Q92643	GPI8	0.169952	0.786841	Common
ENSG00000143153	ATP1B1	P05026	AT1B1	-0.862427	-0.024024	Basal-specific
ENSG00000143537	ADAM15	Q13444	ADA15	-0.0395752	-1.38579	Common
ENSG00000149257	SERPINH1	P50454	SERPH	0.017786	-1.07303	Basal-specific
ENSG00000154305	MIA3	Q5JRA6	TGO1	0.206237	-0.257515	Basal-specific
ENSG00000155304	HSPA13	P48723	HSP13	0.900865	0.389569	Stress-activated
ENSG00000155660	PDIA4	P13667	PDIA4	2.14108	0.132738	Basal-specific
ENSG00000163430	FSTL1	Q12841	FSTL1	-0.29041	-1.00568	Basal-specific
ENSG00000163902	RPN1	P04843	RPN1	0.399593	-0.73585	Basal-specific
ENSG00000163956	LRPAP1	P30533	AMRP	-0.494782	-1.21315	Basal-specific
ENSG00000164176	EDIL3	O43854	EDIL3	-0.581887	-0.176477	Basal-specific
ENSG00000164307	ERAP1	Q9NZ08	ERAP1	0.499489	-0.37581	Common
ENSG00000166147	FBN1	P35555	FBN1	-0.141856	-1.26196	Common
ENSG00000166598	HSP90B1	P14625	ENPL	0.993289	-0.224281	Basal-specific
ENSG00000172037	LAMB2	P55268	LAMB2	-0.0444266	-1.16523	Common
ENSG00000179218	CALR	P27797	CALR	0.592691	-0.236109	Basal-specific
ENSG00000184164	CRELD2	Q6UXH1	CREL2	1.32886	0.114676	Basal-specific
ENSG00000185164	NOMO2	Q5JPE7	NOMO2	0.656503	-0.950003	Common
ENSG00000187498	COL4A1	P02462	CO4A1	-0.840897	-0.52395	Common
ENSG00000188157	AGRN	O00468	AGRIN	-0.382056	-1.19211	Basal-specific
ENSG00000197081	IGF2R	P11717	MPRI	-0.310359	-1.11618	Basal-specific
ENSG00000197746	PSAP	P07602	SAP	-0.162596	-0.336755	Basal-specific
ENSG00000198732	SMOC1	Q9H4F8	SMOC1	-0.322711	-1.00368	Basal-specific
ENSG00000213614	HEXA	P06865	HEXA	-0.535179	-0.612616	Basal-specific
ENSG00000244038	DDOST	P39656	OST48	0.107858	-0.0680727	Basal-specific

## Sheet: Column definition
Sheet 1: mRNA dynamics
Ensemble Gene ID	Ensemble Gene ID
Gene name	Gene name
Gene type	Gene type
UniprotID	Uniprot protein id
Log2 (mRNA Tg/Basal)	Log2 of RNA abundance ratio (mRNA Tg vs Basal)
P-adj (mRNA Tg/Basal)	Adjusted p value comparing difference between mRNA-seq Tg vs Basal
Dynamic type	Dynamic type of mRNA ERM local translation under ER stress
Sheet 2: mRNA overlap
Ensemble Gene ID	Ensemble Gene ID
Gene name	Gene name
UniprotID	Uniprot protein id
Log2 (ERM Enrich Tg/Basal)	Log2 of RNA abundance ratio (ERM Enrich Tg vs Basal)
P-adj (ERM Enrich Tg/Basal)	Adjusted p value comparing difference between ERM Tg Enrich vs ERM Basal Enrich
Log2 (mRNA Tg/Basal)	Log2 of RNA abundance ratio (mRNA Tg vs Basal)
P-adj (mRNA Tg/Basal)	Adjusted p value comparing difference between mRNA-seq Tg vs Basal
Dynamic type	Dynamic type of mRNA ERM local translation under ER stress
Sheet 3: ER proteome overlap
Ensemble Gene ID	Ensemble Gene ID
Gene name	Gene name
UniprotID	Uniprot protein id
Protein name	Protein name
Log2 (ERM Enrich Tg/Basal)	Log2 of RNA abundance ratio (ERM Enrich Tg vs Basal)
Log2 (ER proteome Tg/Basal)	Log2 of protein abundance ratio (ER proteome Tg vs Basal) identified by SubMAPP
Dynamic type	Dynamic type of mRNA ERM local translation under ER stress
Sheet 4: MRF overlap
Ensemble Gene ID	Ensemble Gene ID
Gene name	Gene name
UniprotID	Uniprot protein id
Protein name	Protein name
Log2 (ERM Enrich Tg/Basal)	Log2 of RNA abundance ratio (ERM Enrich Tg vs Basal)
Log2 (MRF Tg/Basal)	Log2 of turnover changing ratio (MRF Tg vs Basal) identified by prox-SILAC
Dynamic type	Dynamic type of mRNA ERM local translation under ER stress
