# Supplementary material for: OptoRibo-seq for spatiotemporally resolved mapping of local protein translatome
Source: Research Square preprint supplement (doi:10.21203/rs.3.rs-3982122/v1), 2024-03-05
Supplement: Supplementary file 4 [file c3c7f27a559c083c4452a564.xlsx]

## Sheet: ER-proximal translatome
Ensemble Gene ID	Gene name	Gene type	UniprotID	Log2 (ERM E/I)	P-adj (ERM E/I)	Log2 (Enrich E/N)	P-adj (Enrich E/N)	GOCC secretome	HPA secretome	MitoCarta	Secretome
ENSG00000005007	UPF1	protein_coding	Q92900	0.703564	3.96325e-06	0.550938	0.0178916	0	0	0	0
ENSG00000006118	TMEM132A	protein_coding	Q24JP5	0.993269	7.34847e-08	0.57051	0.00135374	1	0	0	1
ENSG00000007402	CACNA2D2	protein_coding	Q9NY47	0.726135	2.13079e-07	0.584837	0.000938616	1	1	0	1
ENSG00000010292	NCAPD2	protein_coding	Q15021	0.448285	0.000110004	0.491163	0.0012046	1	0	0	1
ENSG00000023318	ERP44	protein_coding	Q9BS26	0.784863	1.86582e-11	0.382201	0.0098543	1	1	0	1
ENSG00000038427	VCAN	protein_coding	P13611	0.461451	0.000441636	0.849971	4.3848e-09	1	1	0	1
ENSG00000039068	CDH1	protein_coding	P12830	0.748259	0.00225971	0.604725	0.0347561	1	1	0	1
ENSG00000041982	TNC	protein_coding	P24821	0.853169	0.00234546	1.37944	2.1673e-06	1	1	0	1
ENSG00000044574	HSPA5	protein_coding	P11021	1.30985	4.13448e-21	0.351415	0.0444515	1	1	0	1
ENSG00000046604	DSG2	protein_coding	Q14126	0.426928	2.86033e-05	0.561482	2.36843e-05	1	1	0	1
ENSG00000049323	LTBP1	protein_coding	Q14766	0.344027	0.0433472	1.00742	1.5376e-09	1	1	0	1
ENSG00000049449	RCN1	protein_coding	Q15293	0.741548	6.12163e-08	0.448759	0.0180324	1	1	0	1
ENSG00000052749	RRP12	protein_coding	Q5JTH9	0.352221	0.00572395	1.02023	1.13496e-14	1	0	0	1
ENSG00000058262	SEC61A1	protein_coding	P61619	0.63471	1.00639e-08	0.461034	0.000298437	1	1	0	1
ENSG00000062822	POLD1	protein_coding	P28340	0.464544	0.00042436	0.564897	0.000739505	1	0	0	1
ENSG00000064309	CDON	protein_coding	Q4KMG0	0.388591	0.0130716	0.473966	0.0049693	1	1	0	1
ENSG00000064545	TMEM161A	protein_coding	Q9NX61	0.833291	4.34635e-12	0.511293	0.000237597	1	0	0	1
ENSG00000064601	CTSA	protein_coding	P10619	0.541057	0.000782621	0.509876	0.00501252	1	1	0	1
ENSG00000065320	NTN1	protein_coding	O95631	0.502612	0.00995373	0.61702	0.0037011	1	1	0	1
ENSG00000065485	PDIA5	protein_coding	Q14554	0.670481	1.7e-06	0.397495	0.0344112	1	1	0	1
ENSG00000065600	TMEM206	protein_coding	Q9H813	0.623085	0.000349671	0.439514	0.0314366	1	0	0	1
ENSG00000067141	NEO1	protein_coding	Q92859	0.646244	2.98718e-08	0.575791	8.51083e-05	1	1	0	1
ENSG00000070081	NUCB2	protein_coding	P80303	0.630207	0.0133798	0.79402	0.00178833	1	1	1	1
ENSG00000072110	ACTN1	protein_coding	P12814	0.377813	0.00102716	0.343678	0.0180344	1	1	0	1
ENSG00000072682	P4HA2	protein_coding	O15460	0.681622	5.1787e-07	0.630381	5.5735e-05	1	1	0	1
ENSG00000073060	SCARB1	protein_coding	Q8WTV0	0.310807	0.0368762	0.408559	0.0156744	1	1	0	1
ENSG00000074181	NOTCH3	protein_coding	Q9UM47	0.492733	0.00269439	0.510626	0.00919723	1	1	0	1
ENSG00000075213	SEMA3A	protein_coding	Q14563	0.653866	0.00602464	0.761018	0.0024412	1	1	0	1
ENSG00000076706	MCAM	protein_coding	P43121	0.577135	0.00182576	0.498263	0.021624	1	1	0	1
ENSG00000076716	GPC4	protein_coding	O75487	0.899945	1.23275e-10	0.941317	1.52381e-08	1	1	0	1
ENSG00000076924	XAB2	protein_coding	Q9HCS7	0.407138	0.00437136	0.606354	0.000101968	1	1	0	1
ENSG00000076928	ARHGEF1	protein_coding	Q92888	0.530258	0.00271557	0.500822	0.0149722	1	1	0	1
ENSG00000077147	TM9SF3	protein_coding	Q9HD45	0.422983	0.000524775	0.482798	0.00117992	1	1	0	1
ENSG00000077942	FBLN1	protein_coding	P23142	1.39163	2.42318e-18	0.483854	0.0078486	1	1	0	1
ENSG00000083444	PLOD1	protein_coding	Q02809	0.685139	8.24458e-06	0.549824	0.000138519	1	1	0	1
ENSG00000087303	NID2	protein_coding	Q14112	0.865396	2.42002e-09	0.844455	1.91915e-06	1	1	0	1
ENSG00000088035	ALG6	protein_coding	Q9Y672	0.437739	0.0156498	0.720271	4.67876e-05	1	1	0	1
ENSG00000089053	ANAPC5	protein_coding	Q9UJX4	0.509459	3.66804e-06	0.310694	0.0424921	0	0	0	0
ENSG00000089597	GANAB	protein_coding	Q14697	0.600459	5.82114e-05	0.816548	1.58805e-07	1	1	0	1
ENSG00000090861	AARS	protein_coding	P49588	0.483683	0.000260062	0.650334	2.65721e-05	1	0	0	1
ENSG00000090863	GLG1	protein_coding	Q92896	0.756547	4.88293e-05	0.984589	1.46555e-07	1	1	0	1
ENSG00000090932	DLL3	protein_coding	Q9NYJ7	0.819217	0.00121401	0.907995	0.00136544	1	1	0	1
ENSG00000091129	NRCAM	protein_coding	Q92823	0.841302	7.40277e-06	0.895537	3.94719e-05	1	1	0	1
ENSG00000091136	LAMB1	protein_coding	P07942	0.307442	0.0161303	0.86839	3.13504e-11	1	1	0	1
ENSG00000093009	CDC45	protein_coding	O75419	0.652587	0.000107999	0.422973	0.0299281	0	1	0	1
ENSG00000094914	AAAS	protein_coding	Q9NRG9	0.867397	8.32315e-11	0.41982	0.0136524	1	0	0	1
ENSG00000096384	HSP90AB1	protein_coding	P08238	0.451116	0.000466071	0.487356	0.00310215	1	0	0	1
ENSG00000099139	PCSK5	protein_coding	Q92824	0.880362	7.27859e-07	0.897558	1.68068e-09	1	1	0	1
ENSG00000099250	NRP1	protein_coding	O14786	0.387716	0.00313616	0.832003	7.15803e-09	1	1	0	1
ENSG00000100242	SUN2	protein_coding	Q9UH99	0.611515	1.11662e-05	0.487027	0.000882255	1	0	0	1
ENSG00000100280	AP1B1	protein_coding	Q10567	0.726211	5.35368e-11	0.349863	0.0406246	1	1	0	1
ENSG00000100297	MCM5	protein_coding	P33992	0.68848	2.01544e-05	0.444475	0.024697	1	0	0	1
ENSG00000100379	KCTD17	protein_coding	Q8N5Z5	0.530786	0.0169209	0.585187	0.0188074	1	0	0	1
ENSG00000100401	RANGAP1	protein_coding	P46060	0.384546	0.00823832	0.42356	0.00823399	0	1	0	1
ENSG00000100473	COCH	protein_coding	O43405	0.711455	3.78917e-05	0.474969	0.0209291	1	1	0	1
ENSG00000100726	TELO2	protein_coding	Q9Y4R8	0.321412	0.0405137	0.630301	9.59734e-05	1	0	0	1
ENSG00000100979	PLTP	protein_coding	P55058	0.999282	7.9509e-10	0.443163	0.0171073	1	1	0	1
ENSG00000101680	LAMA1	protein_coding	P25391	0.339543	0.0345227	1.09266	1.68068e-09	1	1	0	1
ENSG00000102030	NAA10	protein_coding	P41227	0.758832	1.88744e-06	0.618663	0.00155944	1	0	0	1
ENSG00000102755	FLT1	protein_coding	P17948	0.723891	2.01744e-05	0.808782	2.01393e-06	1	1	0	1
ENSG00000103051	COG4	protein_coding	Q9H9E3	0.669948	3.62166e-07	0.579641	0.00290413	1	1	0	1
ENSG00000103197	TSC2	protein_coding	P49815	0.311366	0.0372122	0.423718	0.00126283	1	0	0	1
ENSG00000103249	CLCN7	protein_coding	P51798	0.360105	0.0282042	0.391677	0.02715	1	0	0	1
ENSG00000104368	PLAT	protein_coding	P00750	0.65641	1.20343e-08	0.768017	7.15803e-09	1	1	0	1
ENSG00000104635	SLC39A14	protein_coding	Q15043	0.463516	0.000921268	0.457387	0.020996	1	1	0	1
ENSG00000104691	UBXN8	protein_coding	O00124	1.17173	4.52844e-05	0.605296	0.0264833	1	1	0	1
ENSG00000104805	NUCB1	protein_coding	Q02818	1.17643	2.24811e-10	0.535772	0.00543537	1	1	0	1
ENSG00000104998	IL27RA	protein_coding	Q6UWB1	1.20364	7.00578e-09	0.64628	0.00437409	1	0	0	1
ENSG00000105197	TIMM50	protein_coding	Q3ZCQ8	0.452054	0.0210362	0.371847	0.0496851	1	0	1	0
ENSG00000105281	SLC1A5	protein_coding	Q15758	0.837365	4.44948e-08	0.505366	0.00473814	1	1	0	1
ENSG00000105290	APLP1	protein_coding	P51693	0.644487	0.0025998	0.581983	0.0133221	1	0	0	1
ENSG00000105426	PTPRS	protein_coding	Q13332	0.450199	0.0158806	0.538807	0.00321541	1	1	0	1
ENSG00000105767	CADM4	protein_coding	Q8NFZ8	0.786056	2.02067e-06	0.381181	0.0401691	1	0	0	1
ENSG00000106009	BRAT1	protein_coding	Q6PJG6	0.596399	5.02269e-06	0.417796	0.00959742	1	0	0	1
ENSG00000106066	CPVL	protein_coding	Q9H3G5	0.413716	0.000221203	0.568821	5.55836e-06	0	1	0	1
ENSG00000106397	PLOD3	protein_coding	O60568	0.968152	1.00235e-12	0.860274	7.15803e-09	1	1	0	1
ENSG00000106868	SUSD1	protein_coding	Q6UWL2	1.10108	4.50739e-09	0.579003	0.0101788	1	1	0	1
ENSG00000107798	LIPA	protein_coding	P38571	0.676771	3.51936e-10	0.469606	0.000374625	1	1	0	1
ENSG00000108424	KPNB1	protein_coding	Q14974	0.418901	0.000788896	0.374452	0.0298924	1	0	0	1
ENSG00000108651	UTP6	protein_coding	Q9NYH9	0.329927	0.0017255	0.35855	0.0284076	0	0	0	0
ENSG00000108784	NAGLU	protein_coding	P54802	0.793673	0.000384101	0.6572	0.00482476	1	1	0	1
ENSG00000109458	GAB1	protein_coding	Q13480	0.694931	4.8109e-05	0.462591	0.0472792	0	1	0	1
ENSG00000109472	CPE	protein_coding	P16870	0.467748	0.000878377	0.361137	0.0410138	1	1	0	1
ENSG00000109586	GALNT7	protein_coding	Q86SF2	0.36338	0.0135235	0.77063	1.82728e-06	1	1	0	1
ENSG00000109861	CTSC	protein_coding	P53634	0.34681	0.0104141	0.77924	4.3848e-09	1	1	0	1
ENSG00000110013	SIAE	protein_coding	Q9HAT2	0.47187	0.00107431	0.562473	0.000534572	1	1	0	1
ENSG00000112655	PTK7	protein_coding	Q13308	0.543727	6.0005e-05	0.576021	3.9407e-05	1	1	0	1
ENSG00000112759	SLC29A1	protein_coding	Q99808	0.482526	0.00104445	0.491524	0.00146149	1	0	0	1
ENSG00000112769	LAMA4	protein_coding	Q16363	0.683809	2.471e-07	0.544539	0.000378746	1	1	0	1
ENSG00000114646	CSPG5	protein_coding	O95196	0.766914	4.66667e-06	0.451026	0.0280266	1	0	0	1
ENSG00000115275	MOGS	protein_coding	Q13724	1.00501	1.23063e-07	0.974677	2.1193e-09	1	1	0	1
ENSG00000115380	EFEMP1	protein_coding	Q12805	0.828361	0.000509204	0.740266	0.00671875	1	1	0	1
ENSG00000115414	FN1	protein_coding	P02751	0.840117	4.96569e-12	1.19889	1.34735e-20	1	1	0	1
ENSG00000115461	IGFBP5	protein_coding	P24593	0.76926	1.01017e-05	0.566152	0.00531443	1	1	0	1
ENSG00000115486	GGCX	protein_coding	P38435	0.835156	1.09182e-08	0.418405	0.0294833	1	0	0	1
ENSG00000115652	UXS1	protein_coding	Q8NBZ7	0.426039	0.0068078	0.371343	0.0415806	1	1	0	1
ENSG00000116106	EPHA4	protein_coding	P54764	0.937359	7.89062e-20	0.700314	1.78898e-08	1	1	0	1
ENSG00000116117	PARD3B	protein_coding	Q8TEW8	1.17249	3.08107e-07	1.00141	2.63273e-05	0	1	0	1
ENSG00000116260	QSOX1	protein_coding	O00391	0.773724	5.05438e-08	0.425967	0.0337866	1	1	0	1
ENSG00000116962	NID1	protein_coding	P14543	0.92112	2.60349e-12	0.89588	5.36276e-10	1	1	0	1
ENSG00000118257	NRP2	protein_coding	O60462	0.44727	0.00674085	0.92096	2.96909e-07	1	1	0	1
ENSG00000118705	RPN2	protein_coding	P04844	0.923514	3.7616e-10	0.424801	0.0286901	1	1	0	1
ENSG00000119004	CYP20A1	protein_coding	Q6UW02	0.499541	0.0144869	0.489433	0.0322538	1	1	0	1
ENSG00000119777	TMEM214	protein_coding	Q6NUQ4	0.39324	0.0133854	0.510213	0.000779393	1	1	0	1
ENSG00000120725	SIL1	protein_coding	Q9H173	1.25954	2.11689e-07	0.848755	0.00192506	1	1	0	1
ENSG00000123064	DDX54	protein_coding	Q8TDD1	0.420268	0.00767898	0.491383	0.00578205	1	1	0	1
ENSG00000123146	ADGRE5	protein_coding	#N/A	1.20017	4.25496e-08	0.779864	0.00103114	0	1	0	1
ENSG00000123689	G0S2	protein_coding	P27469	1.15895	0.0282624	1.14906	0.0405453	0	0	0	0
ENSG00000124006	OBSL1	protein_coding	O75147	0.545649	3.31307e-06	0.683364	1.66402e-05	1	0	0	1
ENSG00000124570	SERPINB6	protein_coding	P35237	0.815979	5.55344e-06	0.639637	0.00381795	1	0	0	1
ENSG00000124783	SSR1	protein_coding	P43307	0.889784	0.000118592	0.553351	0.0438841	1	1	0	1
ENSG00000125503	PPP1R12C	protein_coding	Q9BZL4	0.782043	2.23618e-06	0.432693	0.0343703	0	0	0	0
ENSG00000125520	SLC2A4RG	protein_coding	Q9NR83	0.600694	0.0197718	0.688268	0.0222007	0	0	0	0
ENSG00000125931	CITED1	protein_coding	Q99966	0.794393	2.25516e-06	0.415547	0.0458172	0	0	0	0
ENSG00000127022	CANX	protein_coding	P27824	0.761542	4.67485e-10	0.565247	7.14084e-05	1	1	0	1
ENSG00000127463	EMC1	protein_coding	Q8N766	0.518388	1.2058e-05	0.721746	3.75845e-08	1	1	0	1
ENSG00000128567	PODXL	protein_coding	O00592	0.466012	0.0136059	0.704597	0.000202289	1	1	0	1
ENSG00000129103	SUMF2	protein_coding	Q8NBJ7	0.53326	0.022469	0.506286	0.0467518	1	1	0	1
ENSG00000129347	KRI1	protein_coding	Q8N9T8	0.369707	0.00512302	0.626955	6.49572e-05	0	0	0	0
ENSG00000130164	LDLR	protein_coding	P01130	0.488151	0.000139127	0.692761	4.75335e-07	1	1	0	1
ENSG00000130175	PRKCSH	protein_coding	P14314	1.18069	2.41629e-13	0.876833	8.4378e-07	1	1	0	1
ENSG00000130714	POMT1	protein_coding	Q9Y6A1	0.386144	0.00329164	0.340543	0.0358549	1	1	0	1
ENSG00000131019	ULBP3	protein_coding	Q9BZM4	0.927148	0.00180403	0.692341	0.0324574	1	1	0	1
ENSG00000132182	NUP210	protein_coding	Q8TEM1	0.446143	0.000392943	0.48339	0.000669059	1	0	0	1
ENSG00000132205	EMILIN2	protein_coding	Q9BXX0	0.733225	0.000186911	0.639134	0.00877103	1	1	0	1
ENSG00000132361	CLUH	protein_coding	O75153	0.316298	0.0103747	0.408268	0.00365243	0	1	0	1
ENSG00000132382	MYBBP1A	protein_coding	Q9BQG0	0.349432	0.00562269	0.528958	8.47071e-05	1	1	0	1
ENSG00000132623	ANKEF1	protein_coding	Q9NU02	0.565788	0.00731719	0.523849	0.0244172	0	1	0	1
ENSG00000132768	DPH2	protein_coding	Q9BQC3	0.38364	0.0307236	0.377443	0.040583	0	0	0	0
ENSG00000133313	CNDP2	protein_coding	Q96KP4	0.322466	0.0311136	0.51368	0.00183248	0	0	0	0
ENSG00000133895	MEN1	protein_coding	O00255	0.524155	3.56757e-05	0.56119	0.000150968	1	0	0	1
ENSG00000134013	LOXL2	protein_coding	Q9Y4K0	0.732888	0.000956735	0.768005	0.000372655	1	1	0	1
ENSG00000134107	BHLHE40	protein_coding	O14503	0.621271	6.93902e-05	0.43298	0.0180148	0	0	0	0
ENSG00000134250	NOTCH2	protein_coding	Q04721	0.577714	1.27326e-06	0.652928	1.44094e-06	1	1	0	1
ENSG00000134294	SLC38A2	protein_coding	Q96QD8	0.567112	2.43715e-09	0.36723	0.0058646	1	1	0	1
ENSG00000134755	DSC2	protein_coding	Q02487	0.53336	0.00178599	0.757403	0.000134116	1	0	0	1
ENSG00000134762	DSC3	protein_coding	Q14574	0.367281	0.0117742	0.666865	1.91915e-06	1	1	0	1
ENSG00000134769	DTNA	protein_coding	Q9Y4J8	0.586465	0.000139477	0.441859	0.0154052	0	1	0	1
ENSG00000134871	COL4A2	protein_coding	P08572	0.906833	8.45793e-12	1.00304	7.52163e-12	1	1	0	1
ENSG00000134910	STT3A	protein_coding	P46977	0.339248	0.0145953	0.374615	0.0230838	1	1	0	1
ENSG00000135047	CTSL	protein_coding	P07711	0.726032	7.95625e-11	0.651601	4.35677e-07	1	1	0	1
ENSG00000135506	OS9	protein_coding	Q13438	0.929529	6.30481e-18	0.69948	2.44606e-05	1	1	0	1
ENSG00000135525	MAP7	protein_coding	Q14244	0.423845	0.0243123	0.603345	0.00299049	0	0	0	0
ENSG00000135723	FHOD1	protein_coding	Q9Y613	0.685196	9.46702e-08	0.453277	0.00223543	1	0	0	1
ENSG00000136026	CKAP4	protein_coding	Q07065	0.42423	0.000976616	0.543159	0.000193047	1	0	0	1
ENSG00000136731	UGGT1	protein_coding	Q9NYU2	0.315871	0.0164858	0.661579	3.4118e-06	1	0	0	1
ENSG00000136943	CTSV	protein_coding	O60911	0.615414	5.72163e-07	0.678159	5.90101e-06	1	1	0	1
ENSG00000138678	GPAT3	protein_coding	Q53EU6	0.462446	0.00942838	0.741046	2.65721e-05	1	1	0	1
ENSG00000138759	FRAS1	protein_coding	Q86XX4	0.515437	0.00144367	0.62794	0.00016414	1	1	0	1
ENSG00000138760	SCARB2	protein_coding	Q14108	0.711997	3.06982e-06	0.532785	0.00265501	1	0	0	1
ENSG00000138829	FBN2	protein_coding	P35556	0.509613	1.26275e-05	1.21808	2.62359e-24	1	1	0	1
ENSG00000139182	CLSTN3	protein_coding	Q9BQT9	0.821925	6.29065e-10	0.871501	2.52603e-09	1	1	0	1
ENSG00000139219	COL2A1	protein_coding	P02458	0.865674	2.2071e-08	0.972017	2.52603e-09	1	1	0	1
ENSG00000139514	SLC7A1	protein_coding	P30825	0.321167	0.00268884	0.399928	0.00131572	1	0	0	1
ENSG00000139921	TMX1	protein_coding	Q9H3N1	0.726397	3.48358e-05	0.48866	0.0259821	1	1	0	1
ENSG00000140092	FBLN5	protein_coding	Q9UBX5	0.878729	1.60577e-06	0.608447	0.00341452	1	1	0	1
ENSG00000141458	NPC1	protein_coding	O15118	0.48433	0.00228301	0.471676	0.0106053	1	1	0	1
ENSG00000141756	FKBP10	protein_coding	Q96AY3	0.414856	0.00170694	0.723015	2.76965e-07	1	1	1	1
ENSG00000142156	COL6A1	protein_coding	P12109	0.479563	0.000103707	0.425832	0.00296456	1	1	0	1
ENSG00000142173	COL6A2	protein_coding	P12110	0.763576	3.56076e-07	0.440555	0.0179899	1	1	0	1
ENSG00000142186	SCYL1	protein_coding	Q96KG9	0.335094	0.0208735	0.389668	0.00503413	1	0	0	1
ENSG00000142192	APP	protein_coding	P05067	0.803745	3.3727e-06	0.856416	1.37317e-06	1	1	0	1
ENSG00000142627	EPHA2	protein_coding	P29317	0.43854	0.0101197	0.47485	0.0101012	1	1	0	1
ENSG00000142798	HSPG2	protein_coding	P98160	0.678839	0.00304154	0.780816	0.00104147	1	1	0	1
ENSG00000142892	PIGK	protein_coding	Q92643	0.472061	1.67086e-05	0.369951	0.00365243	1	1	0	1
ENSG00000142949	PTPRF	protein_coding	P10586	0.422614	0.00023541	0.445301	0.0016124	1	1	0	1
ENSG00000143153	ATP1B1	protein_coding	P05026	0.40163	0.00211568	0.353121	0.0329832	1	0	0	1
ENSG00000143537	ADAM15	protein_coding	Q13444	0.421774	0.0112917	0.350607	0.0433588	1	1	0	1
ENSG00000143641	GALNT2	protein_coding	Q10471	0.525204	0.000788896	0.585913	0.000315347	1	1	0	1
ENSG00000143643	TTC13	protein_coding	Q8NBP0	0.308114	0.0447711	0.548209	8.353e-05	0	1	0	1
ENSG00000143815	LBR	protein_coding	Q14739	0.376871	0.00053054	0.518089	2.9915e-05	1	0	0	1
ENSG00000144712	CAND2	protein_coding	O75155	0.452122	0.00120943	0.400297	0.0387376	0	0	0	0
ENSG00000145882	PCYOX1L	protein_coding	Q8NBM8	0.67769	8.8411e-08	0.458569	0.00465185	1	1	0	1
ENSG00000146350	TBC1D32	protein_coding	Q96NH3	0.819476	2.22109e-10	0.526211	0.000938832	0	0	0	0
ENSG00000146828	SLC12A9	protein_coding	Q9BXP2	0.414196	0.0363606	0.486458	0.0319607	1	0	0	1
ENSG00000147257	GPC3	protein_coding	P51654	0.810536	2.76966e-06	0.698134	0.00033501	1	1	0	1
ENSG00000148356	LRSAM1	protein_coding	Q6UWE0	0.543347	0.000831896	0.442201	0.0198707	1	0	0	1
ENSG00000148400	NOTCH1	protein_coding	P46531	1.24899	1.26355e-15	0.751435	2.91736e-06	1	0	0	1
ENSG00000149136	SSRP1	protein_coding	Q08945	0.301914	0.0119635	0.378542	0.00919723	0	0	0	0
ENSG00000149257	SERPINH1	protein_coding	P50454	0.894749	3.48422e-09	0.348086	0.0435287	1	1	0	1
ENSG00000149294	NCAM1	protein_coding	P13591	0.855197	2.53547e-05	0.85708	1.12575e-05	1	1	0	1
ENSG00000149782	PLCB3	protein_coding	Q01970	0.453348	0.00656722	0.455728	0.0186632	1	0	0	1
ENSG00000150471	ADGRL3	protein_coding	Q9HAR2	0.53065	0.0169062	0.680835	0.00582842	1	0	0	1
ENSG00000150893	FREM2	protein_coding	Q5SZK8	0.670153	3.03491e-06	0.92283	3.89867e-08	1	0	0	1
ENSG00000150938	CRIM1	protein_coding	Q9NZV1	0.423654	0.02289	0.883268	1.66382e-06	1	0	0	1
ENSG00000151176	PLBD2	protein_coding	Q8NHP8	0.62328	0.000134732	0.458356	0.0239917	0	1	0	1
ENSG00000152661	GJA1	protein_coding	P17302	0.616354	0.00187112	0.621183	0.00336996	1	1	0	1
ENSG00000153132	CLGN	protein_coding	O14967	0.398247	0.00173155	0.368077	0.0184383	1	1	0	1
ENSG00000154305	MIA3	protein_coding	Q5JRA6	0.425305	0.0065067	0.608828	9.59437e-05	1	1	0	1
ENSG00000154734	ADAMTS1	protein_coding	Q9UHI8	0.360871	0.00667818	0.879694	1.68068e-09	1	1	0	1
ENSG00000155660	PDIA4	protein_coding	P13667	0.686958	6.14616e-06	0.598385	0.000279989	1	1	0	1
ENSG00000155760	FZD7	protein_coding	O75084	0.877802	4.01959e-06	0.592919	0.017731	1	0	0	1
ENSG00000156140	ADAMTS3	protein_coding	O15072	0.405058	0.0454573	0.651191	0.0019984	1	1	0	1
ENSG00000156675	RAB11FIP1	protein_coding	Q6WKZ4	0.326311	0.0196007	0.412088	0.0361503	0	1	0	1
ENSG00000156697	UTP14A	protein_coding	Q9BVJ6	0.42183	0.00450242	0.444843	0.0447023	0	0	0	0
ENSG00000157514	TSC22D3	protein_coding	Q99576	0.336882	0.0279225	0.403202	0.0147322	0	1	0	1
ENSG00000159640	ACE	protein_coding	P12821	1.1493	0.0409041	1.39937	0.0105314	1	1	0	1
ENSG00000160075	SSU72	protein_coding	Q9NP77	0.554112	3.47142e-05	0.386702	0.0189704	0	0	0	0
ENSG00000160161	CILP2	protein_coding	Q8IUL8	0.920837	7.93244e-05	0.625247	0.0190849	0	1	0	1
ENSG00000160214	RRP1	protein_coding	P56182	0.532381	1.66395e-06	0.35117	0.0173324	0	0	0	0
ENSG00000161940	BCL6B	protein_coding	Q8N143	0.660467	0.0010102	0.457354	0.0468085	0	1	0	1
ENSG00000162407	PLPP3	protein_coding	O14495	0.857508	2.21667e-14	0.662422	2.06613e-06	1	1	0	1
ENSG00000162729	IGSF8	protein_coding	Q969P0	0.621697	0.000297086	0.601649	0.000579426	1	1	0	1
ENSG00000162745	OLFML2B	protein_coding	Q68BL8	1.14229	2.43609e-05	0.654989	0.0379259	1	1	0	1
ENSG00000162769	FLVCR1	protein_coding	Q9Y5Y0	1.14103	9.07244e-14	0.520866	0.00321825	1	1	0	1
ENSG00000163251	FZD5	protein_coding	Q13467	0.684025	0.000724685	0.629945	0.00828884	1	0	0	1
ENSG00000163399	ATP1A1	protein_coding	P05023	0.750249	2.37431e-08	0.625446	6.26746e-06	1	0	0	1
ENSG00000163430	FSTL1	protein_coding	Q12841	0.505075	2.29566e-05	0.483429	0.00105107	1	1	0	1
ENSG00000163516	ANKZF1	protein_coding	Q9H8Y5	0.7011	3.40986e-05	0.473589	0.0457493	1	0	0	1
ENSG00000163694	RBM47	protein_coding	A0AV96	0.545895	0.010293	0.492753	0.0499957	0	0	0	0
ENSG00000163902	RPN1	protein_coding	P04843	0.482732	5.59068e-05	0.35781	0.0295597	1	1	0	1
ENSG00000163956	LRPAP1	protein_coding	P30533	1.01193	2.0917e-22	0.524373	0.000111378	1	1	0	1
ENSG00000164176	EDIL3	protein_coding	O43854	0.775909	0.00417359	0.749332	0.0296636	0	1	0	1
ENSG00000164291	ARSK	protein_coding	Q6UWY0	0.996802	9.26342e-10	0.551746	0.000927031	1	1	0	1
ENSG00000164307	ERAP1	protein_coding	Q9NZ08	1.40892	5.83656e-15	1.05026	6.0758e-07	1	1	0	1
ENSG00000164619	BMPER	protein_coding	Q8N8U9	0.833921	0.00263387	0.893748	0.00298222	1	1	0	1
ENSG00000164694	FNDC1	protein_coding	Q4ZHG4	1.12935	3.50581e-06	1.80759	7.46482e-11	1	1	0	1
ENSG00000164889	SLC4A2	protein_coding	P04920	0.496046	0.00196079	0.379684	0.0367111	1	1	0	1
ENSG00000165194	PCDH19	protein_coding	Q8TAB3	0.700063	0.0024167	0.835522	3.44379e-05	1	0	0	1
ENSG00000165282	PIGO	protein_coding	Q8TEQ8	0.530103	0.000623917	0.645314	3.97884e-06	1	0	0	1
ENSG00000165474	GJB2	protein_coding	P29033	0.948986	0.00627066	0.796888	0.0486365	1	0	0	1
ENSG00000165661	QSOX2	protein_coding	Q6ZRP7	0.398837	0.00168879	0.43335	0.0108867	1	1	0	1
ENSG00000166033	HTRA1	protein_coding	Q92743	0.780835	2.41026e-07	0.61645	0.00042364	1	1	0	1
ENSG00000166147	FBN1	protein_coding	P35555	0.644341	2.40814e-05	0.748624	6.51676e-06	1	1	0	1
ENSG00000166508	MCM7	protein_coding	P33993	0.479096	0.00227397	0.574463	0.00102043	1	0	0	1
ENSG00000166598	HSP90B1	protein_coding	P14625	0.780537	7.82597e-05	0.618277	0.00503413	1	1	0	1
ENSG00000167378	IRGQ	protein_coding	Q8WZA9	0.471767	0.00281802	0.37592	0.0404021	0	1	0	1
ENSG00000167674	CTB-50L17.10	protein_coding	#N/A	0.443388	7.26991e-05	0.406252	0.0128486	0	0	0	0
ENSG00000167700	MFSD3	protein_coding	Q96ES6	0.453333	0.0100728	0.487209	0.0250575	1	1	0	1
ENSG00000167775	CD320	protein_coding	Q9NPF0	1.06006	3.18861e-19	0.414938	0.0120569	1	0	0	1
ENSG00000168216	LMBRD1	protein_coding	Q9NUN5	0.661649	7.8072e-08	0.455611	0.00212898	1	0	0	1
ENSG00000168938	PPIC	protein_coding	P45877	0.444739	0.0452183	0.664171	0.00168111	0	1	0	1
ENSG00000169299	PGM2	protein_coding	Q96G03	0.33211	0.0162859	0.379515	0.04673	1	0	0	1
ENSG00000169371	SNUPN	protein_coding	O95149	0.763623	0.00823832	0.666195	0.034126	0	0	0	0
ENSG00000169515	CCDC8	protein_coding	Q9H0W5	0.638663	0.000107285	0.535397	0.00168048	1	1	0	1
ENSG00000169919	GUSB	protein_coding	P08236	0.376511	0.0126626	0.392979	0.0323946	1	1	0	1
ENSG00000170502	NUDT9	protein_coding	Q9BW91	0.426958	0.00165699	0.407396	0.0184	0	1	1	1
ENSG00000170522	ELOVL6	protein_coding	Q9H5J4	1.1167	3.09688e-17	0.471333	0.00219322	1	0	0	1
ENSG00000170558	CDH2	protein_coding	P19022	0.415205	0.00476612	0.715593	1.6044e-06	1	1	0	1
ENSG00000170965	PLAC1	protein_coding	Q9HBJ0	0.889751	0.000534638	0.781304	0.00402915	1	1	0	1
ENSG00000171004	HS6ST2	protein_coding	Q96MM7	1.10443	2.84387e-15	0.85243	2.89128e-07	1	1	0	1
ENSG00000171298	GAA	protein_coding	P10253	0.662689	1.54736e-07	0.733067	5.17841e-07	1	0	0	1
ENSG00000171365	CLCN5	protein_coding	P51795	0.39029	0.0258122	0.613027	0.000557666	1	1	0	1
ENSG00000171603	CLSTN1	protein_coding	O94985	0.671393	3.22716e-09	0.711529	2.17003e-08	1	0	0	1
ENSG00000172037	LAMB2	protein_coding	P55268	0.991079	3.49597e-09	0.995333	2.20291e-09	1	1	0	1
ENSG00000173376	NDNF	protein_coding	Q8TB73	0.852795	3.66804e-06	0.707672	0.000791482	1	1	0	1
ENSG00000173402	DAG1	protein_coding	Q14118	0.474593	7.59269e-05	0.339825	0.0444399	1	1	0	1
ENSG00000173473	SMARCC1	protein_coding	Q92922	0.746727	7.28352e-06	0.547735	0.00705202	0	0	0	0
ENSG00000173638	SLC19A1	protein_coding	P41440	0.638375	1.49243e-05	0.71229	3.38287e-05	1	1	0	1
ENSG00000173705	SUSD5	protein_coding	O60279	1.00553	2.11487e-13	0.842226	6.16872e-07	1	1	0	1
ENSG00000174106	LEMD3	protein_coding	Q9Y2U8	0.450646	0.00012043	0.333416	0.0475738	1	0	0	1
ENSG00000174684	B4GAT1	protein_coding	O43505	0.749824	5.85084e-11	0.669189	5.13356e-07	1	1	0	1
ENSG00000175467	SART1	protein_coding	O43290	0.87347	6.88718e-09	0.588301	0.000397359	1	1	0	1
ENSG00000177283	FZD8	protein_coding	Q9H461	0.611835	0.000840044	0.788782	1.52611e-06	1	1	0	1
ENSG00000177697	CD151	protein_coding	P48509	0.49338	0.00062265	0.417336	0.0114271	1	0	0	1
ENSG00000178802	MPI	protein_coding	P34949	0.381556	0.0189235	0.327572	0.0438606	0	1	0	1
ENSG00000179218	CALR	protein_coding	P27797	0.825526	4.62311e-08	0.410655	0.0218428	1	1	0	1
ENSG00000179222	MAGED1	protein_coding	Q9Y5V3	0.427287	0.000814691	0.408408	0.00875198	1	0	0	1
ENSG00000179262	RAD23A	protein_coding	P54725	0.431591	0.00026281	0.30802	0.0433822	0	0	0	0
ENSG00000181104	F2R	protein_coding	P25116	1.19298	3.21711e-10	0.478297	0.0387376	1	1	0	1
ENSG00000181408	UTS2R	protein_coding	Q9UKP6	1.40355	3.07527e-06	1.03221	0.00085496	1	0	0	1
ENSG00000181744	C3orf58	protein_coding	Q8NDZ4	0.522623	0.00471062	0.422048	0.0441927	1	1	0	1
ENSG00000182087	TMEM259	protein_coding	Q4ZIN3	0.670599	7.79777e-05	0.375186	0.00972138	1	1	0	1
ENSG00000182168	UNC5C	protein_coding	O95185	0.408394	0.0170273	0.676374	0.000152359	1	1	0	1
ENSG00000182871	COL18A1	protein_coding	P39060	0.581172	0.000363385	0.637985	0.000390239	1	1	0	1
ENSG00000182985	CADM1	protein_coding	Q9BY67	0.605508	9.79055e-05	0.571751	0.00398054	1	1	0	1
ENSG00000183098	GPC6	protein_coding	Q9Y625	0.538645	0.00714171	0.940565	3.38287e-05	1	1	0	1
ENSG00000183248	PRR36	protein_coding	#N/A	0.853017	0.00638848	0.620899	0.0410138	0	1	0	1
ENSG00000183853	KIRREL	protein_coding	Q96J84	0.702028	3.04231e-06	0.446403	0.0284931	0	0	0	0
ENSG00000184164	CRELD2	protein_coding	Q6UXH1	0.937443	4.25743e-06	0.455693	0.0263033	1	1	0	1
ENSG00000184432	COPB2	protein_coding	P35606	0.585326	6.22962e-08	1.321	4.53254e-18	1	0	0	1
ENSG00000184967	NOC4L	protein_coding	Q9BVI4	0.496918	0.00330751	0.420985	0.02808	1	0	0	1
ENSG00000185008	ROBO2	protein_coding	Q9HCK4	0.672778	0.000368453	0.756329	0.00021055	1	0	0	1
ENSG00000185164	NOMO2	protein_coding	Q5JPE7	0.903617	2.5174e-06	0.583883	3.38287e-05	1	0	0	1
ENSG00000187498	COL4A1	protein_coding	P02462	0.573668	0.000276942	0.805836	6.71168e-06	1	1	0	1
ENSG00000187676	B3GLCT	protein_coding	Q6Y288	0.668398	0.000200844	0.423149	0.0415806	1	1	0	1
ENSG00000187955	COL14A1	protein_coding	Q05707	0.65339	0.00367742	2.24343	2.18664e-13	1	1	0	1
ENSG00000188157	AGRN	protein_coding	O00468	0.813613	2.49212e-06	0.62549	0.000268386	1	1	0	1
ENSG00000196562	SULF2	protein_coding	Q8IWU5	0.708254	2.25244e-06	0.659239	0.000280271	1	1	0	1
ENSG00000196700	ZNF512B	protein_coding	Q96KM6	0.336072	0.043691	0.451446	0.0197106	0	0	0	0
ENSG00000196950	SLC39A10	protein_coding	Q9ULF5	0.524844	0.000167119	0.574216	0.00237446	1	1	0	1
ENSG00000197081	IGF2R	protein_coding	P11717	0.346844	0.00780478	0.776711	9.43434e-10	1	1	0	1
ENSG00000197324	LRP10	protein_coding	Q7Z4F1	0.389026	0.00989896	0.564909	0.000664298	1	0	0	1
ENSG00000197565	COL4A6	protein_coding	Q14031	0.684624	0.000244545	0.965106	8.17979e-07	1	1	0	1
ENSG00000197746	PSAP	protein_coding	P07602	1.29551	6.4717e-11	0.538942	0.0190988	1	1	0	1
ENSG00000198231	DDX42	protein_coding	Q86XP3	0.426902	0.0211483	0.439268	0.0345215	1	0	0	1
ENSG00000198732	SMOC1	protein_coding	Q9H4F8	0.711352	2.06241e-05	0.577788	0.000597487	0	1	0	1
ENSG00000213339	QTRT1	protein_coding	Q9BXR0	0.390364	0.00962588	0.393315	0.0343703	0	0	1	0
ENSG00000213614	HEXA	protein_coding	P06865	0.339218	0.0376931	0.390225	0.0364199	1	1	0	1
ENSG00000240184	PCDHGC3	protein_coding	Q9UN70	0.665787	0.00953539	0.761577	0.00808335	1	1	0	1
ENSG00000240857	RDH14	protein_coding	Q9HBH5	0.833067	4.05231e-06	0.420338	0.0416083	1	0	1	0
ENSG00000242173	ARHGDIG	protein_coding	Q99819	1.03533	0.00026651	0.83189	0.00600403	1	1	0	1
ENSG00000242419	PCDHGC4	protein_coding	Q9Y5F7	1.1467	0.000458112	0.757957	0.0450862	1	1	0	1
ENSG00000244038	DDOST	protein_coding	P39656	1.33558	2.15367e-34	0.432776	0.026222	1	1	0	1
ENSG00000253873	PCDHGA11	protein_coding	Q9Y5H2	0.691738	0.0147732	0.727887	0.0231763	1	1	0	1
ENSG00000254986	DPP3	protein_coding	Q9NY33	0.628678	5.11313e-05	0.433201	0.0159802	1	1	0	1
ENSG00000256269	HMBS	protein_coding	P08397	0.784424	9.53124e-07	0.405836	0.0356573	0	1	1	1
ENSG00000262655	SPON1	protein_coding	Q9HCB6	0.725504	3.16952e-05	0.795375	4.58107e-05	1	1	0	1
ENSG00000276043	UHRF1	protein_coding	Q96T88	0.437054	0.0050653	0.720584	0.00146518	0	0	0	0

## Sheet: Unfiltered data
Ensemble Gene ID	Gene name	Gene type	UniprotID	Log2 (ERM E/I)	P-adj (ERM E/I)	Log2 (Enrich E/N)	P-adj (Enrich E/N)	GOCC secretome	HPA secretome	MitoCarta	Secretome
ENSG00000000003	TSPAN6	protein_coding	O43657	0.0174158	0.955242	0.0619064	0.842488	1	0	0	1
ENSG00000000005	TNMD	protein_coding	Q9H2S6	1.12465	0.166389	1.53364	NA	1	0	0	1
ENSG00000000419	DPM1	protein_coding	O60762	-0.0637964	0.819539	-0.0511202	0.882195	1	0	0	1
ENSG00000000457	SCYL3	protein_coding	Q8IZE3	0.0222282	0.949383	0.0213585	0.957904	1	0	0	1
ENSG00000000460	C1orf112	protein_coding	#N/A	0.175441	0.290612	0.551195	0.000131222	0	0	0	0
ENSG00000000938	FGR	protein_coding	P09769	4.38098	NA	1.88946	NA	1	1	0	1
ENSG00000000971	CFH	protein_coding	P08603	0.854864	0.447838	0.606287	NA	1	1	0	1
ENSG00000001036	FUCA2	protein_coding	Q9BTY2	0.141773	0.418611	0.589313	4.8533e-05	1	1	0	1
ENSG00000001084	GCLC	protein_coding	P48506	-0.201973	0.279087	0.085021	0.764363	0	0	0	0
ENSG00000001167	NFYA	protein_coding	P23511	-0.213084	0.298532	-0.365556	0.0792121	0	0	0	0
ENSG00000001460	STPG1	protein_coding	Q5TH74	-0.600456	0.0376931	-0.400259	0.270366	0	0	0	0
ENSG00000001461	NIPAL3	protein_coding	Q6P499	0.269222	0.351344	-0.488444	0.0196505	1	0	0	1
ENSG00000001497	LAS1L	protein_coding	Q9Y4W2	0.074968	0.69778	0.193261	0.318481	1	0	0	1
ENSG00000001561	ENPP4	protein_coding	Q9Y6X5	-0.244164	0.51755	0.0308095	0.956682	1	0	0	1
ENSG00000001617	SEMA3F	protein_coding	Q13275	0.163841	0.658819	0.0604683	0.917883	1	1	0	1
ENSG00000001626	CFTR	protein_coding	P13569	-2.17495	NA	NA	NA	1	0	0	1
ENSG00000001629	ANKIB1	protein_coding	Q9P2G1	-0.21274	0.405917	-0.446658	0.09676	0	1	0	1
ENSG00000001630	CYP51A1	protein_coding	Q16850	1.38203	0.000274721	0.602589	0.193278	1	1	0	1
ENSG00000001631	KRIT1	protein_coding	O00522	-0.455118	0.0418644	0.578548	0.0190713	1	1	0	1
ENSG00000002016	RAD52	protein_coding	P43351	-0.483007	0.0011826	0.11723	0.697608	0	1	0	1
ENSG00000002079	MYH16	unitary_pseudogene	Q9H6N6	0.0785629	0.951341	-0.222668	NA	0	0	0	0
ENSG00000002330	BAD	protein_coding	Q92934	0.523248	0.0290816	-0.17772	0.62416	0	0	1	0
ENSG00000002549	LAP3	protein_coding	P28838	0.269329	0.0346647	0.286385	0.0747979	0	0	1	0
ENSG00000002586	CD99	protein_coding	P14209	0.701283	4.83686e-09	0.0217018	0.944659	1	1	0	1
ENSG00000002587	HS3ST1	protein_coding	O14792	2.47967	NA	2.52915	NA	1	1	0	1
ENSG00000002726	AOC1	protein_coding	P19801	NA	NA	-0.777548	NA	1	1	0	1
ENSG00000002745	WNT16	protein_coding	Q9UBV4	-0.364365	NA	-0.343132	NA	1	1	0	1
ENSG00000002746	HECW1	protein_coding	Q76N89	-0.607777	0.664672	0.0519431	NA	0	0	0	0
ENSG00000002822	MAD1L1	protein_coding	Q9Y6D9	0.39729	0.0066742	0.328209	0.0568942	0	1	0	1
ENSG00000002834	LASP1	protein_coding	Q14847	0.200448	0.229843	-0.292488	0.177863	0	1	0	1
ENSG00000002919	SNX11	protein_coding	Q9Y5W9	0.188377	0.489201	-0.168412	0.525392	1	0	0	1
ENSG00000002933	TMEM176A	protein_coding	Q96HP8	NA	NA	NA	NA	1	0	0	1
ENSG00000003056	M6PR	protein_coding	P20645	0.444635	0.118649	-0.33477	0.329189	1	1	0	1
ENSG00000003096	KLHL13	protein_coding	Q9P2N7	-0.0499757	0.839606	0.264002	0.217315	0	0	0	0
ENSG00000003137	CYP26B1	protein_coding	Q9NR63	0.504172	0.219792	0.0907773	0.905792	1	1	0	1
ENSG00000003147	ICA1	protein_coding	Q05084	-0.103299	0.812746	0.167756	0.756942	1	1	0	1
ENSG00000003249	DBNDD1	protein_coding	Q9H9R9	-0.336279	0.252192	-0.0570435	0.914698	0	0	0	0
ENSG00000003393	ALS2	protein_coding	Q96Q42	-0.40749	0.00579071	0.00353491	0.991575	1	0	0	1
ENSG00000003400	CASP10	protein_coding	Q92851	-0.158133	0.682036	-0.364566	0.347786	0	1	0	1
ENSG00000003402	CFLAR	protein_coding	O15519	0.162141	0.562451	-0.0371125	0.92761	0	1	0	1
ENSG00000003436	TFPI	protein_coding	P10646	0.137837	0.719993	0.716245	0.0228665	1	1	0	1
ENSG00000003509	NDUFAF7	protein_coding	Q7L592	-0.11688	0.646839	-0.101568	0.774557	1	0	1	0
ENSG00000003756	RBM5	protein_coding	P52756	-0.348188	0.00933244	0.310425	0.199268	0	0	0	0
ENSG00000003987	MTMR7	protein_coding	Q9Y216	0.460758	0.246792	-0.269213	0.580643	1	0	0	1
ENSG00000003989	SLC7A2	protein_coding	P52569	0.278088	0.100332	0.562625	0.000489916	1	1	0	1
ENSG00000004059	ARF5	protein_coding	P84085	0.253806	0.158456	-0.316875	0.0870522	1	0	1	0
ENSG00000004139	SARM1	protein_coding	Q6SZW1	1.06685	2.79011e-07	0.487105	0.0568942	0	1	0	1
ENSG00000004142	POLDIP2	protein_coding	Q9Y2S7	0.185293	0.251913	-0.0227694	0.937871	0	0	1	0
ENSG00000004399	PLXND1	protein_coding	Q9Y4D7	0.0125184	0.980315	0.199475	0.640816	1	0	0	1
ENSG00000004455	AK2	protein_coding	P54819	0.115516	0.520182	-0.0800699	0.736808	0	0	1	0
ENSG00000004468	CD38	protein_coding	P28907	-3.57854	NA	-2.81157	NA	1	1	0	1
ENSG00000004478	FKBP4	protein_coding	Q02790	0.306514	0.0106815	0.121547	0.527444	0	0	0	0
ENSG00000004487	KDM1A	protein_coding	O60341	0.0569854	0.782637	0.207586	0.28607	0	1	0	1
ENSG00000004534	RBM6	protein_coding	P78332	-0.376814	0.00698727	0.153511	0.508386	0	0	0	0
ENSG00000004660	CAMKK1	protein_coding	Q8N5S9	-0.0412295	0.917451	-0.0476396	0.898241	0	0	0	0
ENSG00000004700	RECQL	protein_coding	P46063	-0.527774	8.10757e-05	0.394649	0.0259196	1	0	0	1
ENSG00000004766	VPS50	protein_coding	Q96JG6	-0.28151	0.290312	-0.110841	0.794648	1	1	0	1
ENSG00000004776	HSPB6	protein_coding	O14558	-0.342309	0.763498	0.0448743	NA	1	0	0	1
ENSG00000004777	ARHGAP33	protein_coding	O14559	0.368724	0.577979	0.380173	0.593218	1	1	0	1
ENSG00000004779	NDUFAB1	protein_coding	O14561	0.154805	0.6754	-0.611269	0.0325097	0	0	1	0
ENSG00000004799	PDK4	protein_coding	Q16654	-0.429024	0.450723	0.0557346	0.95974	0	0	1	0
ENSG00000004809	SLC22A16	protein_coding	Q86VW1	1.37374	NA	-0.172473	NA	1	0	0	1
ENSG00000004838	ZMYND10	protein_coding	O75800	-0.873749	0.263635	-0.285308	NA	0	1	0	1
ENSG00000004846	ABCB5	protein_coding	Q2M3G0	1.63452	NA	0.49781	NA	1	0	0	1
ENSG00000004848	ARX	protein_coding	Q96QS3	1.95054	NA	1.37223	NA	0	0	0	0
ENSG00000004864	SLC25A13	protein_coding	Q9UJS0	0.0320122	0.869118	0.406164	0.00660159	1	0	1	0
ENSG00000004866	ST7	protein_coding	Q9NRC1	0.188292	0.564401	-0.00826621	0.986465	1	0	0	1
ENSG00000004897	CDC27	protein_coding	P30260	-0.392366	0.304479	-0.160876	0.761769	0	0	0	0
ENSG00000004939	SLC4A1	protein_coding	P02730	-1.93509	NA	-1.76143	NA	1	0	0	1
ENSG00000004948	CALCR	protein_coding	P30988	1.37232	NA	-1.19645	NA	1	1	0	1
ENSG00000004961	HCCS	protein_coding	P53701	0.135559	0.512604	-0.212574	0.409253	0	1	1	1
ENSG00000004975	DVL2	protein_coding	O14641	0.0696435	0.732967	0.354113	0.03391	1	0	0	1
ENSG00000005001	PRSS22	protein_coding	Q9GZN4	NA	NA	NA	NA	1	1	0	1
ENSG00000005007	UPF1	protein_coding	Q92900	0.703564	3.96325e-06	0.550938	0.0178916	0	0	0	0
ENSG00000005020	SKAP2	protein_coding	O75563	0.424944	0.00983069	0.361099	0.076813	1	0	0	1
ENSG00000005022	SLC25A5	protein_coding	P05141	0.089166	0.827883	-0.526126	0.081958	1	0	1	0
ENSG00000005059	MCUB	protein_coding	Q9NWR8	0.722465	9.10225e-05	0.118038	0.739013	0	0	1	0
ENSG00000005073	HOXA11	protein_coding	P31270	-0.313647	0.0950433	-0.0856721	0.800232	0	0	0	0
ENSG00000005075	POLR2J	protein_coding	P52435	0.117217	0.866916	-0.237929	0.701872	0	0	0	0
ENSG00000005100	DHX33	protein_coding	Q9H6R0	0.0421996	0.839606	-0.240629	0.142008	0	0	0	0
ENSG00000005102	MEOX1	protein_coding	P50221	-0.0383383	0.979244	-0.107077	NA	0	0	0	0
ENSG00000005108	THSD7A	protein_coding	Q9UPZ6	-0.251633	0.833758	0.357105	NA	1	0	0	1
ENSG00000005156	LIG3	protein_coding	P49916	0.142438	0.49909	0.543409	0.00453542	0	0	0	0
ENSG00000005175	RPAP3	protein_coding	Q9H6T3	-0.210848	0.335826	0.183575	0.464617	0	0	0	0
ENSG00000005187	ACSM3	protein_coding	Q53FZ2	-0.156131	0.869435	-0.197456	NA	0	0	1	0
ENSG00000005189	AC004381.6	protein_coding	#N/A	-0.166114	0.405427	-0.00910114	0.980545	0	1	0	1
ENSG00000005194	CIAPIN1	protein_coding	Q6FI81	0.219238	0.172939	0.213956	0.256982	0	0	0	0
ENSG00000005206	SPPL2B	protein_coding	Q8TCT7	0.212777	0.524262	0.0785331	0.872953	1	1	0	1
ENSG00000005238	FAM214B	protein_coding	Q7L5A3	-0.084595	0.933373	-0.406458	NA	0	0	0	0
ENSG00000005243	COPZ2	protein_coding	Q9P299	-0.316039	0.840425	-0.266206	NA	1	0	0	1
ENSG00000005249	PRKAR2B	protein_coding	P31323	-0.0147138	0.966486	0.305925	0.207525	1	1	0	1
ENSG00000005302	MSL3	protein_coding	Q8N5Y2	0.135868	0.672417	-0.195513	0.528794	0	0	0	0
ENSG00000005339	CREBBP	protein_coding	Q92793	-0.134609	0.488951	-0.10918	0.640335	0	0	0	0
ENSG00000005379	TSPOAP1	protein_coding	O95153	-0.556105	NA	1.89479	NA	0	0	0	0
ENSG00000005381	MPO	protein_coding	P05164	NA	NA	NA	NA	1	1	0	1
ENSG00000005421	PON1	protein_coding	P27169	-0.834916	NA	-2.77685	NA	1	1	0	1
ENSG00000005436	GCFC2	protein_coding	P16383	-0.194494	0.462339	0.166661	0.501157	0	0	0	0
ENSG00000005448	WDR54	protein_coding	Q9H977	0.355788	0.0354867	0.120917	0.657258	0	1	0	1
ENSG00000005469	CROT	protein_coding	Q9UKG9	0.0831338	0.81622	0.483607	0.0900899	1	1	1	1
ENSG00000005471	ABCB4	protein_coding	P21439	-0.146063	0.858866	0.223045	NA	1	1	0	1
ENSG00000005483	KMT2E	protein_coding	Q8IZD2	-0.564346	0.000186571	-0.262864	0.274221	1	0	0	1
ENSG00000005486	RHBDD2	protein_coding	Q6NTF9	0.221285	0.437955	-0.275679	0.386056	1	1	0	1
ENSG00000005513	SOX8	protein_coding	P57073	-0.151755	0.82079	-0.180399	0.804087	0	0	0	0
ENSG00000005700	IBTK	protein_coding	Q9P2D0	-2.27963	NA	-1.34827	NA	1	0	0	1
ENSG00000005801	ZNF195	protein_coding	O14628	0.0174688	0.948456	-0.358679	0.0338671	0	0	0	0
ENSG00000005810	MYCBP2	protein_coding	O75592	-0.35779	0.0655455	0.289188	0.282151	1	1	0	1
ENSG00000005812	FBXL3	protein_coding	Q9UKT7	-0.254413	0.370522	0.049932	0.905792	0	0	0	0
ENSG00000005844	ITGAL	protein_coding	P20701	0.312835	NA	1.5264	NA	1	1	0	1
ENSG00000005882	PDK2	protein_coding	Q15119	0.274508	0.36312	0.194866	0.550874	0	0	1	0
ENSG00000005884	ITGA3	protein_coding	P26006	0.483301	0.0400013	0.570435	0.0500577	1	1	0	1
ENSG00000005889	ZFX	protein_coding	P17010	-0.337489	0.0340047	-0.166372	0.479049	0	0	0	0
ENSG00000005893	LAMP2	protein_coding	P13473	0.00903853	0.986545	0.0113689	0.983353	1	0	0	1
ENSG00000005961	ITGA2B	protein_coding	P08514	0.0768495	0.904759	0.15121	0.829603	1	0	0	1
ENSG00000005981	ASB4	protein_coding	Q9Y574	NA	NA	NA	NA	0	0	0	0
ENSG00000006007	GDE1	protein_coding	Q9NZC3	0.293957	0.0656902	-0.0603224	0.838327	1	1	0	1
ENSG00000006015	C19orf60	protein_coding	#N/A	0.473939	0.156143	-0.234106	0.601869	0	1	0	1
ENSG00000006016	CRLF1	protein_coding	O75462	0.660308	0.441976	0.00343723	NA	1	1	0	1
ENSG00000006025	OSBPL7	protein_coding	Q9BZF2	-0.0451712	0.959908	0.316225	0.723528	1	0	0	1
ENSG00000006042	TMEM98	protein_coding	Q9Y2Y6	0.463041	0.00681297	0.058913	0.873677	1	0	0	1
ENSG00000006047	YBX2	protein_coding	Q9Y2T7	0.108067	0.932691	-0.165506	NA	0	0	0	0
ENSG00000006059	KRT33A	protein_coding	O76009	NA	NA	NA	NA	1	0	0	1
ENSG00000006062	MAP3K14	protein_coding	Q99558	0.0244363	0.956301	0.549689	0.0636771	0	1	0	1
ENSG00000006071	ABCC8	protein_coding	Q09428	-0.401145	0.555552	-0.381881	0.650247	1	1	0	1
ENSG00000006116	CACNG3	protein_coding	O60359	NA	NA	NA	NA	1	0	0	1
ENSG00000006118	TMEM132A	protein_coding	Q24JP5	0.993269	7.34847e-08	0.57051	0.00135374	1	0	0	1
ENSG00000006125	AP2B1	protein_coding	P63010	0.0306736	0.910406	0.105659	0.720566	1	1	0	1
ENSG00000006128	TAC1	protein_coding	P20366	0.0399772	0.968003	-0.0226306	0.98311	1	1	0	1
ENSG00000006194	ZNF263	protein_coding	O14978	-0.271202	0.346054	-0.252263	0.396322	0	0	0	0
ENSG00000006210	CX3CL1	protein_coding	P78423	-1.02664	NA	2.12315	NA	1	1	0	1
ENSG00000006282	SPATA20	protein_coding	Q8TB22	0.231098	0.469136	0.0552283	0.914027	1	1	1	1
ENSG00000006283	CACNA1G	protein_coding	O43497	-0.1598	0.868312	-0.641635	0.402796	1	0	0	1
ENSG00000006327	TNFRSF12A	protein_coding	Q9NP84	0.916617	7.88943e-05	0.135658	0.725886	1	1	0	1
ENSG00000006377	DLX6	protein_coding	P56179	0.0690774	0.896929	-0.0475187	0.943067	0	0	0	0
ENSG00000006432	MAP3K9	protein_coding	P80192	-0.527345	0.0187834	0.0599675	0.910795	0	1	0	1
ENSG00000006451	RALA	protein_coding	P11233	-0.0409263	0.890937	0.025881	0.942662	1	0	0	1
ENSG00000006453	BAIAP2L1	protein_coding	Q9UHR4	-0.0960599	0.638637	-0.114303	0.65615	1	1	0	1
ENSG00000006459	KDM7A	protein_coding	Q6ZMT4	-0.0492752	0.847444	0.127049	0.59794	0	1	0	1
ENSG00000006468	ETV1	protein_coding	P50549	0.360021	0.522423	0.128946	0.88544	0	0	0	0
ENSG00000006530	AGK	protein_coding	Q53H12	0.0669689	0.776431	0.366264	0.0622604	0	1	1	1
ENSG00000006534	ALDH3B1	protein_coding	P43353	-0.198409	0.870777	-0.120766	NA	1	0	0	1
ENSG00000006555	TTC22	protein_coding	#N/A	0.154075	NA	1.16319	NA	0	0	0	0
ENSG00000006576	PHTF2	protein_coding	Q8N3S3	-0.567677	0.00204599	-0.162786	0.60779	1	0	0	1
ENSG00000006606	CCL26	protein_coding	Q9Y258	-0.655165	NA	1.11854	NA	1	1	0	1
ENSG00000006607	FARP2	protein_coding	O94887	-0.20824	0.156565	0.0866213	0.73576	0	0	0	0
ENSG00000006611	USH1C	protein_coding	Q9Y6N9	0.730185	0.123578	-0.0289861	0.972071	1	0	0	1
ENSG00000006625	GGCT	protein_coding	O75223	-0.0689877	0.783825	-0.178327	0.503063	0	0	0	0
ENSG00000006634	DBF4	protein_coding	Q9UBU7	-0.000194261	0.999832	-0.45568	0.050955	0	0	0	0
ENSG00000006638	TBXA2R	protein_coding	P21731	0.512778	0.685431	0.179929	NA	1	1	0	1
ENSG00000006652	IFRD1	protein_coding	O00458	-0.412146	0.00277536	0.0300315	0.942938	0	1	0	1
ENSG00000006659	LGALS14	protein_coding	Q8TCE9	NA	NA	NA	NA	0	0	0	0
ENSG00000006695	COX10	protein_coding	Q12887	-0.604087	0.00689325	-0.395697	0.173048	1	0	1	0
ENSG00000006704	GTF2IRD1	protein_coding	Q9UHL9	0.231814	0.300368	0.0361741	0.925019	0	0	0	0
ENSG00000006712	PAF1	protein_coding	Q8N7H5	0.107712	0.667844	0.286328	0.197192	1	0	0	1
ENSG00000006715	VPS41	protein_coding	P49754	-0.0561903	0.828834	0.237218	0.305643	1	0	0	1
ENSG00000006740	ARHGAP44	protein_coding	Q17R89	-0.397595	0.280479	0.00764284	0.991475	0	0	0	0
ENSG00000006744	ELAC2	protein_coding	Q9BQ52	-0.189818	0.26398	0.080988	0.758547	0	0	1	0
ENSG00000006747	SCIN	protein_coding	Q9Y6U3	-0.0252367	0.98274	-0.252393	NA	1	1	0	1
ENSG00000006756	ARSD	protein_coding	P51689	-0.783402	NA	-0.868766	NA	1	1	0	1
ENSG00000006757	PNPLA4	protein_coding	P41247	0.840523	0.0746384	-0.0967374	0.902163	0	1	0	1
ENSG00000006788	MYH13	protein_coding	Q9UKX3	-1.78566	NA	-0.58641	NA	0	0	0	0
ENSG00000006831	ADIPOR2	protein_coding	Q86V24	0.381739	0.0233855	-0.341403	0.0949764	1	0	0	1
ENSG00000006837	CDKL3	protein_coding	Q8IVW4	0.0566555	0.959994	-0.349691	0.697765	0	1	0	1
ENSG00000007001	UPP2	protein_coding	O95045	NA	NA	NA	NA	0	1	0	1
ENSG00000007038	PRSS21	protein_coding	Q9Y6M0	NA	NA	NA	NA	1	1	0	1
ENSG00000007047	MARK4	protein_coding	Q96L34	0.280886	0.339119	0.21742	0.537023	0	0	0	0
ENSG00000007062	PROM1	protein_coding	O43490	-2.7659	NA	-1.79541	NA	1	1	0	1
ENSG00000007080	CCDC124	protein_coding	Q96CT7	0.846883	2.1677e-08	0.0230183	0.950609	1	1	0	1
ENSG00000007129	CEACAM21	protein_coding	Q3KPI0	NA	NA	NA	NA	1	0	0	1
ENSG00000007168	PAFAH1B1	protein_coding	P43034	-0.406884	0.00123707	0.100585	0.662966	0	0	0	0
ENSG00000007171	NOS2	protein_coding	P35228	-0.153799	0.846599	0.39727	NA	1	0	0	1
ENSG00000007174	DNAH9	protein_coding	Q9NYC9	-0.312469	NA	0.44243	NA	0	0	0	0
ENSG00000007202	KIAA0100	protein_coding	Q14667	0.0689666	0.873984	0.0754692	0.882981	1	1	1	1
ENSG00000007216	SLC13A2	protein_coding	Q13183	2.70256	NA	2.74475	NA	1	0	0	1
ENSG00000007237	GAS7	protein_coding	O60861	0.0751837	0.931722	-0.196553	0.803243	1	1	0	1
ENSG00000007255	TRAPPC6A	protein_coding	O75865	0.749255	0.00626425	0.171513	0.675862	1	0	0	1
ENSG00000007264	MATK	protein_coding	P42679	0.139926	0.677842	0.19382	0.653755	0	0	0	0
ENSG00000007306	CEACAM7	protein_coding	Q14002	NA	NA	NA	NA	1	1	0	1
ENSG00000007312	CD79B	protein_coding	P40259	0.0966701	NA	0.721551	NA	1	1	0	1
ENSG00000007314	SCN4A	protein_coding	P35499	-0.49744	0.47305	-0.363705	NA	1	0	0	1
ENSG00000007341	ST7L	protein_coding	Q8TDW4	-0.0494369	0.881312	-0.0677377	0.83639	1	0	0	1
ENSG00000007350	TKTL1	protein_coding	P51854	0.323351	0.834932	-0.40805	NA	0	0	0	0
ENSG00000007372	PAX6	protein_coding	P26367	-0.0298867	0.91983	-0.159648	0.563587	0	0	0	0
ENSG00000007376	RPUSD1	protein_coding	Q9UJJ7	0.434111	0.000978306	-0.0301037	0.921983	0	1	0	1
ENSG00000007384	RHBDF1	protein_coding	Q96CC6	0.0102263	0.986451	-0.155102	0.7603	1	1	0	1
ENSG00000007392	LUC7L	protein_coding	Q9NQ29	0.50694	0.000283124	-0.302268	0.127365	0	0	0	0
ENSG00000007402	CACNA2D2	protein_coding	Q9NY47	0.726135	2.13079e-07	0.584837	0.000938616	1	1	0	1
ENSG00000007516	BAIAP3	protein_coding	O94812	-0.75294	0.128903	-0.21029	0.830794	1	0	0	1
ENSG00000007520	TSR3	protein_coding	Q9UJK0	0.863498	2.66538e-05	0.249632	0.345045	0	1	0	1
ENSG00000007541	PIGQ	protein_coding	Q9BRB3	0.0606383	0.867022	0.472417	0.106027	1	1	0	1
ENSG00000007545	CRAMP1	protein_coding	Q96RY5	-0.324368	0.35759	0.163121	0.74989	0	0	0	0
ENSG00000007866	TEAD3	protein_coding	Q99594	-0.0572527	0.899641	-0.0808623	0.871994	0	0	0	0
ENSG00000007908	SELE	protein_coding	P16581	NA	NA	-1.79541	NA	1	0	0	1
ENSG00000007923	DNAJC11	protein_coding	Q9NVH1	0.310612	0.0392153	0.0325667	0.918498	0	0	1	0
ENSG00000007933	FMO3	protein_coding	P31513	0.779748	NA	0.840343	NA	1	1	0	1
ENSG00000007944	MYLIP	protein_coding	Q8WY64	-0.225401	0.485722	-0.224689	0.52223	1	0	0	1
ENSG00000007952	NOX1	protein_coding	Q9Y5S8	-1.70055	NA	-0.355418	NA	1	0	0	1
ENSG00000007968	E2F2	protein_coding	Q14209	-0.834916	NA	NA	NA	0	0	0	0
ENSG00000008018	PSMB1	protein_coding	P20618	0.44039	0.0167181	-0.209778	0.37587	1	0	0	1
ENSG00000008056	SYN1	protein_coding	P17600	0.458853	0.328948	0.60493	0.235703	1	0	0	1
ENSG00000008083	JARID2	protein_coding	Q92833	0.00319369	0.992498	0.419577	0.0641184	0	0	0	0
ENSG00000008086	CDKL5	protein_coding	O76039	-0.31546	0.48857	-0.101401	0.886866	0	0	0	0
ENSG00000008118	CAMK1G	protein_coding	Q96NX5	1.97019	NA	2.99232	NA	1	0	0	1
ENSG00000008128	CDK11A	protein_coding	Q9UQ88	0.0453993	0.979114	0.031259	NA	0	0	0	0
ENSG00000008130	NADK	protein_coding	O95544	0.00683677	0.98619	0.108524	0.747956	0	1	0	1
ENSG00000008196	TFAP2B	protein_coding	Q92481	0.154001	NA	1.16319	NA	0	0	0	0
ENSG00000008197	TFAP2D	protein_coding	Q7Z6R9	NA	NA	NA	NA	0	0	0	0
ENSG00000008226	DLEC1	protein_coding	Q9Y238	0.543007	0.689582	0.593821	NA	0	0	0	0
ENSG00000008256	CYTH3	protein_coding	O43739	-0.476391	0.0723755	-0.296047	0.378616	1	0	0	1
ENSG00000008277	ADAM22	protein_coding	Q9P0K1	0.0519948	0.905181	0.462978	0.110224	1	1	0	1
ENSG00000008282	SYPL1	protein_coding	Q16563	0.260773	0.328201	0.165435	0.636586	1	0	0	1
ENSG00000008283	CYB561	protein_coding	P49447	0.213216	0.553817	0.0361849	0.94697	1	0	0	1
ENSG00000008294	SPAG9	protein_coding	O60271	0.00860297	0.98084	0.181158	0.500008	0	0	0	0
ENSG00000008300	CELSR3	protein_coding	Q9NYQ7	-0.110815	0.689874	0.277137	0.301839	1	0	0	1
ENSG00000008311	AASS	protein_coding	Q9UDR5	-0.162589	0.409686	0.621287	0.000191196	0	1	1	1
ENSG00000008323	PLEKHG6	protein_coding	Q3KR16	-1.63644	NA	-0.838933	NA	0	1	0	1
ENSG00000008324	SS18L2	protein_coding	Q9UHA2	0.384631	0.0950433	-0.0981451	0.772163	0	0	0	0
ENSG00000008382	MPND	protein_coding	Q8N594	0.159556	0.698555	0.218765	0.637645	0	0	0	0
ENSG00000008394	MGST1	protein_coding	P10620	-0.0453221	0.839606	-0.11288	0.640912	1	1	1	1
ENSG00000008405	CRY1	protein_coding	Q16526	-0.20702	0.313004	0.231527	0.356611	0	0	1	0
ENSG00000008438	PGLYRP1	protein_coding	O75594	-1.63655	NA	-1.98574	NA	1	1	0	1
ENSG00000008441	NFIX	protein_coding	Q14938	-0.114063	0.789541	0.136073	0.763895	0	0	0	0
ENSG00000008513	ST3GAL1	protein_coding	Q11201	0.0835594	0.903422	0.0904086	0.914179	1	1	0	1
ENSG00000008516	MMP25	protein_coding	Q9NPA2	-0.104378	0.949353	-0.303235	NA	1	1	0	1
ENSG00000008517	IL32	protein_coding	P24001	-0.16541	0.89734	-0.536437	NA	1	1	0	1
ENSG00000008710	PKD1	protein_coding	P98161	-0.304636	0.203631	-0.0304713	0.956479	1	0	0	1
ENSG00000008735	MAPK8IP2	protein_coding	Q13387	0.349277	0.153491	0.405441	0.147103	0	0	0	0
ENSG00000008838	MED24	protein_coding	O75448	0.198102	0.161548	0.365067	0.0191376	0	0	0	0
ENSG00000008853	RHOBTB2	protein_coding	Q9BYZ6	0.0370498	0.946488	-0.0278327	0.967478	1	1	0	1
ENSG00000008869	HEATR5B	protein_coding	Q9P2D3	-0.112876	0.499553	0.745176	4.34938e-06	1	0	0	1
ENSG00000008952	SEC62	protein_coding	Q99442	0.42741	0.173296	0.175797	0.692412	1	1	0	1
ENSG00000008988	RPS20	protein_coding	P60866	0.0583647	0.863931	-0.415872	0.0817423	1	1	0	1
ENSG00000009307	CSDE1	protein_coding	O75534	0.00666234	0.980504	0.259983	0.0868342	1	0	0	1
ENSG00000009335	UBE3C	protein_coding	Q15386	-0.276173	0.123346	0.0288903	0.936178	0	1	0	1
ENSG00000009413	REV3L	protein_coding	O60673	-0.621512	0.00357782	-0.785767	0.000365671	0	0	0	0
ENSG00000009694	TENM1	protein_coding	Q9UKZ4	-0.881828	0.0065522	0.0462493	0.956734	1	0	0	1
ENSG00000009709	PAX7	protein_coding	P23759	-0.375778	0.788999	-0.0709477	NA	0	0	0	0
ENSG00000009724	MASP2	protein_coding	O00187	-0.866354	0.145727	-0.0503816	NA	1	1	0	1
ENSG00000009765	IYD	protein_coding	Q6PHW0	NA	NA	NA	NA	1	1	0	1
ENSG00000009780	FAM76A	protein_coding	Q8TAV0	0.453274	0.027938	0.032374	0.936839	0	0	0	0
ENSG00000009790	TRAF3IP3	protein_coding	Q9Y228	-0.271509	NA	0.0454517	NA	1	1	0	1
ENSG00000009830	POMT2	protein_coding	Q9UKY4	0.00758027	0.982605	0.325926	0.159903	1	0	0	1
ENSG00000009844	VTA1	protein_coding	Q9NP79	-0.0489532	0.836397	-0.390899	0.0368217	1	1	0	1
ENSG00000009950	MLXIPL	protein_coding	Q9NP71	-0.617933	0.0793128	-0.0382588	0.95769	0	1	0	1
ENSG00000009954	BAZ1B	protein_coding	Q9UIG0	0.17697	0.183682	0.52954	0.000950754	0	0	0	0
ENSG00000010017	RANBP9	protein_coding	Q96S59	0.00392535	0.990615	-0.0594164	0.872964	1	0	0	1
ENSG00000010030	ETV7	protein_coding	Q9Y603	-2.15317	NA	0.706489	NA	0	0	0	0
ENSG00000010072	SPRTN	protein_coding	Q9H040	-0.275819	0.125048	-0.395065	0.0336726	0	0	0	0
ENSG00000010165	METTL13	protein_coding	Q8N6R0	0.308293	0.0327441	0.117969	0.647876	0	0	0	0
ENSG00000010219	DYRK4	protein_coding	Q9NR20	-0.454486	0.110204	-0.105489	0.836105	0	1	0	1
ENSG00000010244	ZNF207	protein_coding	O43670	-0.137109	0.670345	-0.0919616	0.816573	0	1	0	1
ENSG00000010256	UQCRC1	protein_coding	P31930	0.283656	0.0600943	0.219769	0.280338	0	0	1	0
ENSG00000010270	STARD3NL	protein_coding	O95772	0.225241	0.194865	0.192993	0.397453	1	1	0	1
ENSG00000010278	CD9	protein_coding	P21926	0.649697	1.54148e-06	-0.14412	0.541817	1	1	0	1
ENSG00000010282	HHATL	protein_coding	Q9HCP6	0.313293	NA	-0.778323	NA	1	0	0	1
ENSG00000010292	NCAPD2	protein_coding	Q15021	0.448285	0.000110004	0.491163	0.0012046	1	0	0	1
ENSG00000010295	IFFO1	protein_coding	Q0D2I5	0.338215	0.0468386	-0.0949846	0.748641	0	0	0	0
ENSG00000010310	GIPR	protein_coding	P48546	1.08411	0.0883759	-0.257787	0.761178	1	0	0	1
ENSG00000010318	PHF7	protein_coding	Q9BWX1	-0.286866	0.529628	-0.610468	0.129145	1	1	0	1
ENSG00000010319	SEMA3G	protein_coding	Q9NS98	0.217143	0.667169	-0.427208	0.338972	1	1	0	1
ENSG00000010322	NISCH	protein_coding	Q9Y2I1	-0.195895	0.257161	-0.0242385	0.938615	1	0	0	1
ENSG00000010327	STAB1	protein_coding	Q9NY15	0.602057	NA	0.441092	NA	1	1	0	1
ENSG00000010361	FUZ	protein_coding	Q9BT04	-0.00580785	0.986229	0.0305413	0.931003	0	0	0	0
ENSG00000010379	SLC6A13	protein_coding	Q9NSD5	-0.374696	0.680867	-0.175344	NA	1	0	0	1
ENSG00000010404	IDS	protein_coding	P22304	-1.22849	6.72785e-07	-0.740898	0.0180148	0	1	0	1
ENSG00000010438	PRSS3	protein_coding	P35030	-1.66478	NA	-3.33356	NA	1	1	0	1
ENSG00000010539	ZNF200	protein_coding	P98182	0.391565	0.0196836	-0.29336	0.137275	0	0	0	0
ENSG00000010610	CD4	protein_coding	P01730	-1.07889	0.610386	-0.289258	NA	1	1	0	1
ENSG00000010626	LRRC23	protein_coding	Q53EV4	-0.572891	0.119932	-0.273988	0.631424	0	0	0	0
ENSG00000010671	BTK	protein_coding	Q06187	-0.506245	0.647645	-1.11578	NA	1	1	0	1
ENSG00000010704	HFE	protein_coding	Q30201	-1.70991	NA	-0.95293	NA	1	0	0	1
ENSG00000010803	SCMH1	protein_coding	Q96GD3	-0.629157	0.00105642	0.0780074	0.847098	0	0	0	0
ENSG00000010810	FYN	protein_coding	P06241	-0.00910401	0.968344	0.082453	0.716088	1	1	0	1
ENSG00000010818	HIVEP2	protein_coding	P31629	-0.45101	0.0189497	-0.214937	0.492932	0	0	0	0
ENSG00000010932	FMO1	protein_coding	Q01740	0.153433	NA	0.179811	NA	1	0	0	1
ENSG00000011007	TCEB3	protein_coding	#N/A	0.0856754	0.637471	0.365783	0.0653752	0	0	0	0
ENSG00000011009	LYPLA2	protein_coding	O95372	0.730903	0.000562881	0.162317	0.631217	0	0	0	0
ENSG00000011021	CLCN6	protein_coding	P51797	0.0246218	0.945467	-0.138589	0.652381	1	1	0	1
ENSG00000011028	MRC2	protein_coding	Q9UBG0	0.326673	0.121616	0.41571	0.0828409	1	0	0	1
ENSG00000011052	NME1-NME2	protein_coding	#N/A	NA	NA	NA	NA	0	1	0	1
ENSG00000011083	SLC6A7	protein_coding	Q99884	NA	NA	NA	NA	1	0	0	1
ENSG00000011105	TSPAN9	protein_coding	O75954	0.385171	0.123198	0.319167	0.297002	1	1	0	1
ENSG00000011114	BTBD7	protein_coding	Q9P203	2.88844	NA	1.15161	NA	0	0	0	0
ENSG00000011132	APBA3	protein_coding	O96018	-0.063994	0.864852	0.00637187	0.990196	1	1	0	1
ENSG00000011143	MKS1	protein_coding	Q9NXB0	0.132525	0.664154	0.35337	0.215567	1	0	0	1
ENSG00000011198	ABHD5	protein_coding	Q8WTS1	-0.0279719	0.921346	-0.0704086	0.821241	0	1	0	1
ENSG00000011201	ANOS1	protein_coding	P23352	-0.12843	NA	-0.856751	NA	1	1	0	1
ENSG00000011243	AKAP8L	protein_coding	Q9ULX6	0.401029	0.00245561	-0.224799	0.236767	0	0	0	0
ENSG00000011258	MBTD1	protein_coding	Q05BQ5	-0.646197	0.000182194	-0.215449	0.448797	0	0	0	0
ENSG00000011260	UTP18	protein_coding	Q9Y5J1	-0.223726	0.161517	0.752882	5.13781e-06	0	0	0	0
ENSG00000011275	RNF216	protein_coding	Q9NWF9	0.0128465	0.960545	-0.00248077	0.992522	0	0	0	0
ENSG00000011295	TTC19	protein_coding	Q6DKK2	-0.204934	0.288319	-0.116414	0.664511	0	1	1	1
ENSG00000011304	PTBP1	protein_coding	P26599	0.0945985	0.723983	0.275285	0.282959	1	0	0	1
ENSG00000011332	DPF1	protein_coding	Q92782	0.587549	0.00738285	-0.0101801	0.982049	0	0	0	0
ENSG00000011347	SYT7	protein_coding	O43581	-0.246071	0.60653	-0.100917	0.886866	1	0	0	1
ENSG00000011376	LARS2	protein_coding	Q15031	-0.402474	0.000630354	0.360392	0.0196891	0	0	1	0
ENSG00000011405	PIK3C2A	protein_coding	O00443	-0.813398	1.29583e-10	-0.0923701	0.708195	1	0	0	1
ENSG00000011422	PLAUR	protein_coding	Q03405	0.382051	0.15493	0.111411	0.787521	1	1	0	1
ENSG00000011426	ANLN	protein_coding	Q9NQW6	-0.0909897	0.658819	0.409463	0.0570446	0	0	0	0
ENSG00000011451	WIZ	protein_coding	O95785	0.259988	0.161482	0.419463	0.0172135	0	0	0	0
ENSG00000011454	RABGAP1	protein_coding	Q9Y3P9	-0.22436	0.138025	0.0329268	0.913982	0	0	0	0
ENSG00000011465	DCN	protein_coding	P07585	0.856274	NA	-0.470461	NA	1	1	0	1
ENSG00000011478	QPCTL	protein_coding	Q9NXS2	0.521738	0.00352912	0.115319	0.691242	1	1	0	1
ENSG00000011485	PPP5C	protein_coding	P53041	0.161129	0.246388	0.13079	0.556112	1	1	0	1
ENSG00000011523	CEP68	protein_coding	Q76N32	0.113901	0.657019	-0.156816	0.618726	0	0	0	0
ENSG00000011566	MAP4K3	protein_coding	Q8IVH8	-0.45828	0.0397805	-0.114702	0.746238	0	0	0	0
ENSG00000011590	ZBTB32	protein_coding	Q9Y2Y4	0.530967	NA	-0.541493	NA	0	0	0	0
ENSG00000011600	TYROBP	protein_coding	O43914	-0.834916	NA	NA	NA	1	0	0	1
ENSG00000011638	TMEM159	protein_coding	Q96B96	-0.0371124	0.941147	-0.281393	0.518613	1	1	0	1
ENSG00000011677	GABRA3	protein_coding	P34903	-0.834916	NA	-0.777548	NA	1	0	0	1
ENSG00000012048	BRCA1	protein_coding	P38398	-0.24817	0.0930637	0.332637	0.0731776	1	0	0	1
ENSG00000012061	ERCC1	protein_coding	P07992	0.516816	0.0357831	-0.281623	0.411405	0	0	0	0
ENSG00000012124	CD22	protein_coding	P20273	2.85727	NA	1.93051	NA	1	1	0	1
ENSG00000012171	SEMA3B	protein_coding	Q13214	0.240327	0.651204	-0.00239075	0.99748	1	1	0	1
ENSG00000012174	MBTPS2	protein_coding	O43462	-0.0198413	0.957172	0.345411	0.145428	1	0	0	1
ENSG00000012211	PRICKLE3	protein_coding	O43900	0.315901	0.25222	0.293116	0.410758	1	1	0	1
ENSG00000012223	LTF	protein_coding	P02788	2.22804	NA	1.30114	NA	1	1	0	1
ENSG00000012232	EXTL3	protein_coding	O43909	-0.453942	0.0108715	-0.203502	0.492455	1	0	0	1
ENSG00000012504	NR1H4	protein_coding	Q96RI1	-1.66478	NA	NA	NA	0	0	0	0
ENSG00000012660	ELOVL5	protein_coding	Q9NYP7	0.352433	0.027346	0.163494	0.492039	1	1	0	1
ENSG00000012779	ALOX5	protein_coding	P09917	NA	NA	NA	NA	1	0	0	1
ENSG00000012817	KDM5D	protein_coding	Q9BY66	-1.40328	0.0202678	-0.104028	NA	0	0	0	0
ENSG00000012822	CALCOCO1	protein_coding	Q9P1Z2	1.07796	3.19684e-07	0.309729	0.215289	0	0	0	0
ENSG00000012963	UBR7	protein_coding	Q8N806	-0.697697	NA	-1.48369	NA	0	0	0	0
ENSG00000012983	MAP4K5	protein_coding	Q9Y4K4	-0.57209	0.0257209	-0.00805536	0.987274	0	1	0	1
ENSG00000013016	EHD3	protein_coding	Q9NZN3	0.302818	0.469613	0.423044	0.354855	1	1	0	1
ENSG00000013275	PSMC4	protein_coding	P43686	-0.0855932	0.933164	-0.104284	NA	1	0	0	1
ENSG00000013288	MAN2B2	protein_coding	Q9Y2E5	0.520307	0.0222101	0.101935	0.759157	0	1	0	1
ENSG00000013293	SLC7A14	protein_coding	Q8TBB6	NA	NA	NA	NA	1	0	0	1
ENSG00000013297	CLDN11	protein_coding	O75508	3.83758	NA	0.129311	NA	1	0	0	1
ENSG00000013306	SLC25A39	protein_coding	Q9BZJ4	0.0817821	0.719116	-0.0577114	0.847704	1	0	1	0
ENSG00000013364	MVP	protein_coding	Q14764	-0.00261838	0.997374	0.0696943	0.935875	1	0	0	1
ENSG00000013374	NUB1	protein_coding	Q9Y5A7	0.13516	0.378282	-0.0516609	0.872113	0	0	0	0
ENSG00000013375	PGM3	protein_coding	O95394	-0.414814	0.00263387	-0.0119367	0.969808	0	0	0	0
ENSG00000013392	RWDD2A	protein_coding	#N/A	-0.2272	0.561589	0.181618	0.672011	0	0	0	0
ENSG00000013441	CLK1	protein_coding	P49759	-0.387536	0.0020546	-0.411719	0.0078486	0	0	0	0
ENSG00000013503	POLR3B	protein_coding	Q9NW08	-0.20107	0.428855	0.506567	0.0484884	0	0	0	0
ENSG00000013523	ANGEL1	protein_coding	Q9UNK9	-0.122067	0.486301	0.296744	0.141626	1	1	0	1
ENSG00000013561	RNF14	protein_coding	Q9UBS8	-0.00329435	0.990573	-0.090043	0.747758	0	0	0	0
ENSG00000013563	DNASE1L1	protein_coding	P49184	-0.357926	0.321365	-0.159044	0.763355	1	1	0	1
ENSG00000013573	DDX11	protein_coding	Q96FC9	0.512828	0.00624908	0.00229654	0.99457	0	0	0	0
ENSG00000013583	HEBP1	protein_coding	Q9NRV9	0.176658	0.23117	-0.214935	0.325737	1	1	1	1
ENSG00000013588	GPRC5A	protein_coding	Q8NFJ5	0.847864	0.0127331	-0.021897	0.974119	1	1	0	1
ENSG00000013619	MAMLD1	protein_coding	Q13495	0.224496	0.716947	0.173987	0.815891	1	0	0	1
ENSG00000013725	CD6	protein_coding	P30203	NA	NA	-0.777548	NA	1	1	0	1
ENSG00000013810	TACC3	protein_coding	Q9Y6A5	0.311802	0.0229453	-0.33324	0.0447097	0	1	0	1
ENSG00000014123	UFL1	protein_coding	O94874	0.0749063	0.700657	0.341959	0.0669535	1	1	0	1
ENSG00000014138	POLA2	protein_coding	Q14181	-0.518372	0.00336973	0.0110737	0.978086	0	0	0	0
ENSG00000014164	ZC3H3	protein_coding	Q8IXZ2	0.214773	0.640955	0.521424	0.256847	0	1	0	1
ENSG00000014216	CAPN1	protein_coding	P07384	0.0771532	0.765205	0.197929	0.455954	1	0	0	1
ENSG00000014257	ACPP	protein_coding	P15309	-0.201233	0.933145	-0.30215	NA	1	1	0	1
ENSG00000014641	MDH1	protein_coding	P40925	1.00403	1.5072e-08	0.232037	0.391199	1	0	1	0
ENSG00000014824	SLC30A9	protein_coding	Q6PML9	-0.417956	0.01086	-0.0563273	0.860886	1	0	1	0
ENSG00000014914	MTMR11	protein_coding	A4FU01	-0.25633	0.777939	-0.223109	0.822354	0	0	0	0
ENSG00000014919	COX15	protein_coding	Q7KZN9	-0.133163	0.504515	-0.0399263	0.881697	1	0	1	0
ENSG00000015133	CCDC88C	protein_coding	Q9P219	-0.0973097	0.680677	0.160976	0.556976	0	0	0	0
ENSG00000015153	YAF2	protein_coding	Q8IY57	-0.0589636	0.839324	-0.186565	0.47911	0	0	0	0
ENSG00000015171	ZMYND11	protein_coding	Q15326	-0.0309826	0.918367	0.106676	0.720566	0	0	0	0
ENSG00000015285	WAS	protein_coding	P42768	-0.144025	0.82941	0.139459	0.871688	0	0	0	0
ENSG00000015413	DPEP1	protein_coding	P16444	-0.163876	0.89562	-0.00237033	NA	1	1	0	1
ENSG00000015475	BID	protein_coding	P55957	0.446269	0.0511868	-0.0412831	0.917758	1	0	1	0
ENSG00000015479	MATR3.2	protein_coding	#N/A	-0.874972	0.117179	-0.62286	NA	0	1	0	1
ENSG00000015520	NPC1L1	protein_coding	Q9UHC9	0.744783	0.257935	0.550785	0.47137	1	0	0	1
ENSG00000015532	XYLT2	protein_coding	Q9H1B5	-0.0599962	0.840693	-0.0291471	0.940806	1	1	0	1
ENSG00000015568	RGPD5	protein_coding	Q99666	-0.853676	0.0651457	0.439963	0.630917	0	1	0	1
ENSG00000015592	STMN4	protein_coding	Q9H169	-1.85465	NA	-0.574838	NA	1	1	0	1
ENSG00000015676	NUDCD3	protein_coding	Q8IVD9	0.751821	0.0113328	0.559163	0.0961539	0	1	0	1
ENSG00000016082	ISL1	protein_coding	P61371	0.524428	0.00960735	0.1412	0.62416	0	0	0	0
ENSG00000016391	CHDH	protein_coding	Q8NE62	-0.302866	0.165698	-0.0322643	0.941939	0	0	1	0
ENSG00000016402	IL20RA	protein_coding	Q9UHF4	NA	NA	-0.777548	NA	1	1	0	1
ENSG00000016490	CLCA1	protein_coding	A8K7I4	NA	NA	NA	NA	1	1	0	1
ENSG00000016602	CLCA4	protein_coding	Q14CN2	-0.834916	NA	-0.777548	NA	1	0	0	1
ENSG00000016864	GLT8D1	protein_coding	Q68CQ7	0.192515	0.271184	0.107667	0.676046	1	0	0	1
ENSG00000017260	ATP2C1	protein_coding	P98194	0.215893	0.579575	0.449583	0.219597	1	1	0	1
ENSG00000017427	IGF1	protein_coding	P05019	NA	NA	NA	NA	1	1	0	1
ENSG00000017483	SLC38A5	protein_coding	Q8WUX1	0.11662	NA	-0.515406	NA	1	1	0	1
ENSG00000017797	RALBP1	protein_coding	Q15311	-0.0262213	0.942066	-0.187088	0.477795	1	1	0	1
ENSG00000018189	RUFY3	protein_coding	Q7L099	0.0996441	0.651192	0.0439392	0.911635	1	0	0	1
ENSG00000018236	CNTN1	protein_coding	Q12860	0.353223	0.121425	0.546429	0.0338671	1	1	0	1
ENSG00000018280	SLC11A1	protein_coding	P49279	0.589354	0.756305	0.244707	NA	1	0	0	1
ENSG00000018408	WWTR1	protein_coding	Q9GZV5	0.732071	2.9241e-06	-0.096653	0.74807	0	0	0	0
ENSG00000018510	AGPS	protein_coding	O00116	-0.249753	0.104998	0.226673	0.261971	1	1	0	1
ENSG00000018607	ZNF806	unprocessed_pseudogene	P0C7X5	-0.322168	NA	-1.02634	NA	0	0	0	0
ENSG00000018610	CXorf56	protein_coding	Q9H5V9	0.207611	0.219792	-0.447774	0.00533214	0	0	0	0
ENSG00000018625	ATP1A2	protein_coding	P50993	1.79527	NA	1.82742	NA	1	0	0	1
ENSG00000018699	TTC27	protein_coding	Q6P3X3	-0.448557	0.00023814	0.529489	0.00136789	0	0	0	0
ENSG00000018869	ZNF582	protein_coding	Q96NG8	1.19021	4.49999e-09	0.172222	0.660015	0	0	0	0
ENSG00000019102	VSIG2	protein_coding	Q96IQ7	-0.663606	NA	-0.539637	NA	1	0	0	1
ENSG00000019144	PHLDB1	protein_coding	Q86UU1	-0.227331	0.396769	0.381417	0.186875	0	0	0	0
ENSG00000019169	MARCO	protein_coding	Q9UEW3	-0.363355	NA	2.47118	NA	1	1	0	1
ENSG00000019186	CYP24A1	protein_coding	Q07973	-1.73	NA	-2.65307	NA	1	1	1	1
ENSG00000019485	PRDM11	protein_coding	Q9NQV5	-0.431875	0.520182	-0.04006	0.967478	0	0	0	0
ENSG00000019505	SYT13	protein_coding	Q7L8C5	-0.622056	NA	0.37324	NA	1	1	0	1
ENSG00000019549	SNAI2	protein_coding	O43623	0.0596037	0.907645	-0.0195639	0.974575	0	0	0	0
ENSG00000019582	CD74	protein_coding	P04233	0.58856	0.647674	0.374497	NA	1	1	0	1
ENSG00000019991	HGF	protein_coding	P14210	-1.63123	NA	-0.647369	NA	1	1	0	1
ENSG00000019995	ZRANB1	protein_coding	Q9UGI0	0.429771	0.00166143	0.164844	0.425202	0	0	0	0
ENSG00000020129	NCDN	protein_coding	Q9UBB6	0.280175	0.111825	0.315598	0.0975387	1	0	0	1
ENSG00000020181	ADGRA2	protein_coding	Q96PE1	0.0239744	0.970296	-0.0661047	0.914488	1	0	0	1
ENSG00000020219	CCT8L1P	processed_pseudogene	A6NM43	-0.0133687	NA	-0.540381	NA	0	0	0	0
ENSG00000020256	ZFP64	protein_coding	Q9NPA5	-0.29718	0.283127	0.0223886	0.965057	0	0	0	0
ENSG00000020426	MNAT1	protein_coding	P51948	0.452335	0.132997	0.213458	0.600686	0	0	0	0
ENSG00000020577	SAMD4A	protein_coding	Q9UPU9	0.219647	0.547252	0.400903	0.259645	0	1	0	1
ENSG00000020633	RUNX3	protein_coding	Q13761	0.426037	0.509154	0.121082	0.903076	0	0	0	0
ENSG00000020922	MRE11	protein_coding	P49959	-0.537413	0.00340664	0.411696	0.0871569	0	0	0	0
ENSG00000021300	PLEKHB1	protein_coding	Q9UF11	0.560119	0.00197871	-0.572753	0.00861425	1	0	0	1
ENSG00000021355	SERPINB1	protein_coding	P30740	0.10935	0.65613	-0.166805	0.470783	1	0	0	1
ENSG00000021461	CYP3A43	protein_coding	Q9HB55	2.70256	NA	2.74475	NA	1	0	0	1
ENSG00000021488	SLC7A9	protein_coding	P82251	-0.263234	NA	0.865861	NA	1	0	0	1
ENSG00000021574	SPAST	protein_coding	Q9UBP0	0.123432	0.598347	0.0796966	0.804141	1	0	0	1
ENSG00000021645	NRXN3	protein_coding	Q9Y4C0	0.20238	0.438041	0.462164	0.0678868	1	0	0	1
ENSG00000021762	OSBPL5	protein_coding	Q9H0X9	0.31826	0.311594	-0.04401	0.933178	1	1	0	1
ENSG00000021776	AQR	protein_coding	O60306	-0.155927	0.338768	0.612757	2.02153e-05	1	0	0	1
ENSG00000021826	CPS1	protein_coding	P31327	-0.54666	0.000218735	0.213828	0.404925	0	0	1	0
ENSG00000021852	C8B	protein_coding	P07358	NA	NA	NA	NA	1	1	0	1
ENSG00000022267	FHL1	protein_coding	Q13642	0.465902	4.00033e-06	-0.0496802	0.870496	1	1	0	1
ENSG00000022277	RTFDC1	protein_coding	Q9BY42	0.0912663	0.559218	-0.15388	0.499583	0	0	0	0
ENSG00000022355	GABRA1	protein_coding	P14867	1.11731	NA	1.16319	NA	1	1	0	1
ENSG00000022556	NLRP2	protein_coding	Q9NX02	NA	NA	NA	NA	1	1	0	1
ENSG00000022567	SLC45A4	protein_coding	Q5BKX6	0.138206	0.682336	0.0130905	0.980329	1	1	0	1
ENSG00000022840	RNF10	protein_coding	Q8N5U6	-0.21111	0.333079	-0.290611	0.207602	0	0	0	0
ENSG00000022976	ZNF839	protein_coding	A8K0R7	0.0159808	0.96707	0.142087	0.68587	0	1	0	1
ENSG00000023041	ZDHHC6	protein_coding	Q9H6R6	0.0434141	0.88797	-0.00168431	0.996177	1	0	0	1
ENSG00000023171	GRAMD1B	protein_coding	Q3KR37	0.0506388	0.917401	0.324182	0.457207	1	0	0	1
ENSG00000023191	RNH1	protein_coding	P13489	0.872927	NA	-0.242944	0.957551	0	0	0	0
ENSG00000023228	NDUFS1	protein_coding	P28331	-0.456753	0.636691	0.594003	0.52223	0	0	1	0
ENSG00000023287	RB1CC1	protein_coding	Q8TDY2	-0.331457	0.254381	-0.355302	0.270366	1	0	0	1
ENSG00000023318	ERP44	protein_coding	Q9BS26	0.784863	1.86582e-11	0.382201	0.0098543	1	1	0	1
ENSG00000023330	ALAS1	protein_coding	P13196	0.355003	0.0185035	-0.333576	0.0581773	0	0	1	0
ENSG00000023445	BIRC3	protein_coding	Q13489	-0.987667	NA	2.19712	NA	0	0	0	0
ENSG00000023516	AKAP11	protein_coding	Q9UKA4	-0.418892	0.00351607	0.0797775	0.764745	1	1	0	1
ENSG00000023572	GLRX2	protein_coding	Q9NS18	-0.0345019	0.924452	-0.14762	0.635267	0	0	1	0
ENSG00000023608	SNAPC1	protein_coding	Q16533	0.767176	0.0010221	0.526055	0.0913774	0	0	0	0
ENSG00000023697	DERA	protein_coding	Q9Y315	0.221362	0.177578	0.123004	0.603739	1	0	0	1
ENSG00000023734	STRAP	protein_coding	Q9Y3F4	-0.170578	0.464082	-0.0282696	0.94108	0	0	0	0
ENSG00000023839	ABCC2	protein_coding	Q92887	-0.517085	0.474015	-0.428803	0.640816	1	0	0	1
ENSG00000023892	DEF6	protein_coding	Q9H4E7	0.339142	0.49909	0.297584	0.628248	1	0	0	1
ENSG00000023902	PLEKHO1	protein_coding	Q53GL0	0.293014	0.176505	0.251917	0.341678	0	0	0	0
ENSG00000023909	GCLM	protein_coding	P48507	-0.623842	0.0594493	-0.350698	0.391831	0	1	0	1
ENSG00000024048	UBR2	protein_coding	Q8IWV8	-0.145864	0.346047	0.763369	3.55769e-06	0	1	0	1
ENSG00000024422	EHD2	protein_coding	Q9NZN4	0.314516	0.435377	0.0742761	0.906457	1	1	0	1
ENSG00000024526	DEPDC1	protein_coding	Q5TB30	-0.0998515	0.613108	-0.0314754	0.923781	0	0	0	0
ENSG00000024862	CCDC28A	protein_coding	Q8IWP9	0.403822	0.0227451	-0.126696	0.676518	0	0	0	0
ENSG00000025039	RRAGD	protein_coding	Q9NQL2	-0.003791	0.993527	0.255165	0.447746	1	0	0	1
ENSG00000025156	HSF2	protein_coding	Q03933	-0.173945	0.461011	-0.180817	0.509319	0	0	0	0
ENSG00000025293	PHF20	protein_coding	Q9BVI0	-0.0261	0.930002	0.202442	0.405066	0	0	0	0
ENSG00000025423	HSD17B6	protein_coding	O14756	0.247483	0.357273	0.275394	0.379538	1	1	0	1
ENSG00000025434	NR1H3	protein_coding	Q13133	0.332263	0.306889	-0.216137	0.604425	0	0	0	0
ENSG00000025708	TYMP	protein_coding	P19971	-0.709472	0.398636	-0.151296	NA	0	1	0	1
ENSG00000025770	NCAPH2	protein_coding	Q6IBW4	0.597965	1.11759e-06	0.234771	0.220237	1	0	0	1
ENSG00000025772	TOMM34	protein_coding	Q15785	0.127992	0.369767	-0.179238	0.44949	1	0	1	0
ENSG00000025796	SEC63	protein_coding	Q9UGP8	-0.23869	0.178354	0.292567	0.141993	1	1	0	1
ENSG00000025800	KPNA6	protein_coding	O60684	0.11607	0.539152	0.0620881	0.805037	1	0	0	1
ENSG00000026025	VIM	protein_coding	P08670	-0.170921	0.284657	0.212911	0.301466	1	0	0	1
ENSG00000026036	RTEL1-TNFRSF6B	protein_coding	F6WH68	-0.278447	0.827883	-0.261909	NA	0	0	0	0
ENSG00000026103	FAS	protein_coding	P25445	-0.273482	0.469613	0.145012	0.80177	1	1	0	1
ENSG00000026297	RNASET2	protein_coding	O00584	0.473404	0.0357831	-0.130438	0.70723	1	1	0	1
ENSG00000026508	CD44	protein_coding	P16070	1.37095	0.0490698	1.52354	NA	1	1	0	1
ENSG00000026559	KCNG1	protein_coding	Q9UIX4	0.498402	0.113224	-0.0405433	0.951087	1	1	0	1
ENSG00000026652	AGPAT4	protein_coding	Q9NRZ5	0.428043	0.00238098	-0.0163411	0.95705	1	1	0	1
ENSG00000026751	SLAMF7	protein_coding	Q9NQ25	-0.0958359	NA	0.941497	NA	1	1	0	1
ENSG00000026950	BTN3A1	protein_coding	O00481	-0.220062	0.590021	0.0434878	0.950385	1	1	0	1
ENSG00000027001	MIPEP	protein_coding	Q99797	-0.337055	0.0328239	0.340538	0.0613832	0	0	1	0
ENSG00000027075	PRKCH	protein_coding	P24723	0.0499615	0.930002	0.139711	0.803679	1	1	0	1
ENSG00000027644	INSRR	protein_coding	P14616	-0.657135	NA	-1.07334	NA	1	0	0	1
ENSG00000027697	IFNGR1	protein_coding	P15260	0.267731	0.0460817	-0.0220125	0.94229	1	1	0	1
ENSG00000027847	B4GALT7	protein_coding	Q9UBV7	0.483921	0.0238711	0.170481	0.62511	1	0	0	1
ENSG00000027869	SH2D2A	protein_coding	Q9NP31	0.18244	0.775859	0.186923	0.794648	0	0	0	0
ENSG00000028116	VRK2	protein_coding	Q86Y07	-0.313352	0.0821028	0.34706	0.081234	1	1	0	1
ENSG00000028137	TNFRSF1B	protein_coding	P20333	0.578007	NA	2.30798	NA	1	1	0	1
ENSG00000028203	VEZT	protein_coding	Q9HBM0	-0.206102	0.262275	0.0682579	0.808198	1	0	0	1
ENSG00000028277	POU2F2	protein_coding	P09086	0.257254	0.748943	0.0942197	NA	0	1	0	1
ENSG00000028310	BRD9	protein_coding	Q9H8M2	0.0173779	0.959827	0.106025	0.754846	0	0	0	0
ENSG00000028528	SNX1	protein_coding	Q13596	-0.029249	0.89734	0.0573232	0.844931	1	1	0	1
ENSG00000028839	TBPL1	protein_coding	P62380	-0.175084	0.561228	-0.49747	0.0558486	0	0	0	0
ENSG00000029153	ARNTL2	protein_coding	Q8WYA1	-0.653258	0.0434084	0.080896	0.911415	0	0	0	0
ENSG00000029363	BCLAF1	protein_coding	Q9NYF8	0.0863584	0.729007	-0.0134168	0.970463	0	0	0	0
ENSG00000029364	SLC39A9	protein_coding	Q9NUM3	0.787573	4.99374e-08	-0.0368367	0.913982	1	1	0	1
ENSG00000029534	ANK1	protein_coding	P16157	0.365078	0.353258	0.442956	0.309744	1	1	0	1
ENSG00000029559	IBSP	protein_coding	P21815	NA	NA	NA	NA	1	1	0	1
ENSG00000029639	TFB1M	protein_coding	Q8WVM0	-0.355426	0.189674	-0.0837075	0.844063	0	0	1	0
ENSG00000029725	RABEP1	protein_coding	Q15276	0.0131404	0.955686	-0.197729	0.263956	1	1	0	1
ENSG00000029993	HMGB3	protein_coding	O15347	0.468431	0.000342108	-0.114098	0.588258	0	0	0	0
ENSG00000030066	NUP160	protein_coding	Q12769	-0.478438	5.96409e-06	0.591842	4.2695e-06	0	0	0	0
ENSG00000030110	BAK1	protein_coding	Q16611	0.686754	6.0458e-05	-0.366795	0.12859	1	0	1	0
ENSG00000030304	MUSK	protein_coding	O15146	2.1027	NA	1.19543	NA	1	0	0	1
ENSG00000030419	IKZF2	protein_coding	Q9UKS7	0.346092	0.495325	-0.215306	0.709863	0	0	0	0
ENSG00000030582	GRN	protein_coding	P28799	1.29977	9.74846e-20	0.288952	0.110264	1	1	0	1
ENSG00000031003	FAM13B	protein_coding	Q9NYF5	0.00718465	0.989549	0.0950387	0.856131	0	0	0	0
ENSG00000031081	ARHGAP31	protein_coding	Q2M1Z3	-0.157103	0.763437	-0.0524557	0.944593	0	0	0	0
ENSG00000031691	CENPQ	protein_coding	Q7L2Z9	-0.145517	0.592221	-0.617801	0.00404219	0	0	0	0
ENSG00000031698	SARS	protein_coding	P49591	0.249021	0.122651	-0.0143184	0.963852	0	0	0	0
ENSG00000031823	RANBP3	protein_coding	Q9H6Z4	0.0682577	0.755744	-0.0311444	0.920907	0	0	0	0
ENSG00000032219	ARID4A	protein_coding	P29374	-0.0821431	0.790324	0.136686	0.701792	1	1	0	1
ENSG00000032389	TSSC1	protein_coding	#N/A	0.295764	0.27161	-0.237016	0.413872	0	0	0	0
ENSG00000032444	PNPLA6	protein_coding	Q8IY17	-0.435168	0.0230083	0.218371	0.470053	1	0	0	1
ENSG00000032742	IFT88	protein_coding	Q13099	-0.354393	0.147249	0.436717	0.162151	0	0	0	0
ENSG00000033011	ALG1	protein_coding	Q9BT22	0.50407	0.106049	0.100093	0.845388	1	1	0	1
ENSG00000033030	ZCCHC8	protein_coding	Q6NZY4	-0.347107	0.015764	0.137157	0.536512	0	0	0	0
ENSG00000033050	ABCF2	protein_coding	Q9UG63	0.177402	0.487802	0.522132	0.0192384	1	0	1	0
ENSG00000033100	CHPF2	protein_coding	Q9P2E5	-0.152056	0.40999	-0.0101443	0.978666	1	1	0	1
ENSG00000033122	LRRC7	protein_coding	Q96NW7	0.975906	NA	-0.40219	NA	1	0	0	1
ENSG00000033170	FUT8	protein_coding	Q9BYC5	0.108476	0.693718	-0.0345667	0.930172	1	1	0	1
ENSG00000033178	UBA6	protein_coding	A0AVT1	-0.322609	0.0986846	0.263666	0.256847	0	0	0	0
ENSG00000033327	GAB2	protein_coding	Q9UQC2	-0.153613	0.705872	0.270074	0.547079	1	1	0	1
ENSG00000033627	ATP6V0A1	protein_coding	Q93050	0.0971945	0.592627	0.312248	0.0532345	1	1	0	1
ENSG00000033800	PIAS1	protein_coding	O75925	-0.122795	0.594335	-0.199351	0.434372	0	0	0	0
ENSG00000033867	SLC4A7	protein_coding	Q9Y6M7	-0.0764611	0.727157	0.425841	0.0226289	1	1	0	1
ENSG00000034053	APBA2	protein_coding	Q99767	0.923633	0.555623	0.528176	NA	1	0	0	1
ENSG00000034152	MAP2K3	protein_coding	P46734	0.33332	0.19024	0.230498	0.431582	1	0	0	1
ENSG00000034239	EFCAB1	protein_coding	Q9HAE3	-2.36719	NA	-0.39785	NA	0	1	0	1
ENSG00000034510	TMSB10	protein_coding	P63313	0.0391734	0.877623	-0.0031524	0.9917	0	0	0	0
ENSG00000034533	ASTE1	protein_coding	Q2TB18	-0.347027	0.181035	-0.0673155	0.884946	0	1	0	1
ENSG00000034677	RNF19A	protein_coding	Q9NV58	-0.261401	0.254423	-0.0393799	0.92521	1	0	0	1
ENSG00000034693	PEX3	protein_coding	P56589	-0.369199	0.0613215	0.220749	0.43187	1	1	0	1
ENSG00000034713	GABARAPL2	protein_coding	P60520	0.339323	0.00451336	-0.373915	0.012132	1	0	0	1
ENSG00000034971	MYOC	protein_coding	Q99972	NA	NA	-0.810278	NA	1	1	0	1
ENSG00000035115	SH3YL1	protein_coding	Q96HL8	-0.279794	0.474484	0.20485	0.722044	0	0	0	0
ENSG00000035141	FAM136A	protein_coding	Q96C01	-0.139707	0.594627	-0.181597	0.517763	0	0	1	0
ENSG00000035403	VCL	protein_coding	P18206	0.117216	0.445053	0.675972	8.92822e-06	1	0	0	1
ENSG00000035499	DEPDC1B	protein_coding	Q8WUY9	0.11755	0.542279	-0.171514	0.473507	0	1	0	1
ENSG00000035664	DAPK2	protein_coding	Q9UIK4	-0.0937467	0.937582	-0.00501288	NA	1	1	0	1
ENSG00000035681	NSMAF	protein_coding	Q92636	-0.361626	0.0861882	0.363133	0.148738	0	0	0	0
ENSG00000035687	ADSS	protein_coding	P30520	-0.395355	0.00385426	0.205346	0.299698	1	1	0	1
ENSG00000035720	STAP1	protein_coding	Q9ULZ2	-2.04714	NA	-1.63622	NA	0	1	0	1
ENSG00000035862	TIMP2	protein_coding	P16035	2.09518	2.31974e-21	0.159804	0.730208	1	1	0	1
ENSG00000035928	RFC1	protein_coding	P35251	-0.362922	0.0582465	0.20305	0.480042	0	0	0	0
ENSG00000036054	TBC1D23	protein_coding	Q9NUY8	-0.255537	0.0890325	-0.0262872	0.934075	1	1	0	1
ENSG00000036257	CUL3	protein_coding	Q13618	-0.243582	0.282488	0.306776	0.192048	1	0	0	1
ENSG00000036448	MYOM2	protein_coding	P54296	0.116124	NA	0.176766	NA	0	0	0	0
ENSG00000036473	OTC	protein_coding	P00480	NA	NA	NA	NA	0	0	1	0
ENSG00000036530	CYP46A1	protein_coding	Q9Y6A2	-0.0284522	NA	-0.576274	NA	1	1	0	1
ENSG00000036549	ZZZ3	protein_coding	Q8IYH5	-0.227883	0.0901068	-0.0293038	0.916326	0	0	0	0
ENSG00000036565	SLC18A1	protein_coding	P54219	1.11731	NA	1.16319	NA	1	0	0	1
ENSG00000036672	USP2	protein_coding	O75604	0.675705	0.00103908	0.0177647	0.968575	1	1	0	1
ENSG00000036828	CASR.1	protein_coding	#N/A	NA	NA	NA	NA	0	0	0	0
ENSG00000037042	TUBG2	protein_coding	Q9NRH3	0.00752141	0.992498	0.169917	0.774557	0	0	0	0
ENSG00000037241	RPL26L1	protein_coding	Q9UNX3	-0.336159	0.0774168	-0.419851	0.0797552	0	1	0	1
ENSG00000037280	FLT4	protein_coding	P35916	0.580262	0.00503729	0.192613	0.537424	1	1	0	1
ENSG00000037474	NSUN2	protein_coding	Q08J23	0.219961	0.0674752	0.238938	0.189089	0	0	0	0
ENSG00000037637	FBXO42	protein_coding	Q6P3S6	0.105798	0.652893	-0.0119951	0.972632	0	0	0	0
ENSG00000037749	MFAP3	protein_coding	P55082	0.649284	3.40986e-05	0.217533	0.370111	1	1	0	1
ENSG00000037757	MRI1	protein_coding	Q9BV20	0.191395	0.307588	0.0198728	0.954616	0	0	0	0
ENSG00000037897	METTL1	protein_coding	Q9UBP6	0.367112	0.0320227	0.326509	0.154393	0	0	0	0
ENSG00000037965	HOXC8	protein_coding	P31273	0.386244	0.469136	0.275609	0.666392	0	0	0	0
ENSG00000038002	AGA	protein_coding	P20933	0.3391	0.029272	0.286724	0.171713	1	1	0	1
ENSG00000038210	PI4K2B	protein_coding	Q8TCG2	0.550958	0.217712	0.786415	0.106012	1	0	0	1
ENSG00000038219	BOD1L1	protein_coding	Q8NFC6	-0.105572	0.619007	0.0614538	0.806815	0	0	0	0
ENSG00000038274	MAT2B	protein_coding	Q9NZL9	0.108128	0.621486	-0.0930181	0.748699	0	0	0	0
ENSG00000038295	TLL1	protein_coding	O43897	-0.030213	0.969166	0.506207	0.480215	1	1	0	1
ENSG00000038358	EDC4	protein_coding	Q6P2E9	0.0527268	0.80768	0.425307	0.00891542	1	0	0	1
ENSG00000038382	TRIO	protein_coding	O75962	-0.32483	0.0391029	0.282826	0.254957	0	1	0	1
ENSG00000038427	VCAN	protein_coding	P13611	0.461451	0.000441636	0.849971	4.3848e-09	1	1	0	1
ENSG00000038532	CLEC16A	protein_coding	Q2KHT3	0.261934	0.18157	-0.0608664	0.869081	1	1	0	1
ENSG00000038945	MSR1	protein_coding	P21757	NA	NA	NA	NA	1	0	0	1
ENSG00000039068	CDH1	protein_coding	P12830	0.748259	0.00225971	0.604725	0.0347561	1	1	0	1
ENSG00000039123	SKIV2L2	protein_coding	#N/A	-0.352758	0.00796221	0.860898	3.13696e-07	0	0	0	0
ENSG00000039139	DNAH5	protein_coding	Q8TE73	-0.70056	0.635663	0.029393	NA	0	0	0	0
ENSG00000039319	ZFYVE16	protein_coding	Q7Z3T8	-0.533184	0.000519782	0.23737	0.320828	0	1	0	1
ENSG00000039523	FAM65A	protein_coding	#N/A	-0.297063	0.864204	-0.24967	NA	0	1	0	1
ENSG00000039537	C6	protein_coding	P13671	NA	NA	-0.777548	NA	1	1	0	1
ENSG00000039560	RAI14	protein_coding	Q9P0K7	-0.277907	0.0376931	0.225775	0.375801	0	0	0	0
ENSG00000039600	SOX30	protein_coding	O94993	0.408876	NA	0.0441396	NA	0	0	0	0
ENSG00000039650	PNKP	protein_coding	Q96T60	0.305137	0.158864	0.139279	0.667567	1	0	0	1
ENSG00000039987	BEST2	protein_coding	Q8NFU1	0.462667	0.719116	0.299862	NA	1	0	0	1
ENSG00000040199	PHLPP2	protein_coding	Q6ZVD8	-0.208486	0.289105	-0.211257	0.395436	0	1	0	1
ENSG00000040275	SPDL1	protein_coding	Q96EA4	-0.161773	0.283549	-0.268885	0.132114	0	0	0	0
ENSG00000040341	STAU2	protein_coding	Q9NUL3	0.138191	0.588497	0.134656	0.64564	1	0	0	1
ENSG00000040487	PQLC2	protein_coding	Q6ZP29	0.448129	0.027938	-0.0750252	0.836118	1	1	0	1
ENSG00000040531	CTNS	protein_coding	O60931	0.257001	0.205792	0.197051	0.432585	1	1	0	1
ENSG00000040608	RTN4R	protein_coding	Q9BZR6	-0.181498	0.752219	-0.256605	0.656159	1	1	0	1
ENSG00000040633	PHF23	protein_coding	Q9BUL5	0.297893	0.136256	0.113203	0.708195	0	0	0	0
ENSG00000040731	CDH10	protein_coding	Q9Y6N8	0.429907	0.658639	0.653771	NA	1	0	0	1
ENSG00000040933	INPP4A	protein_coding	Q96PE3	-0.234923	0.221273	-0.0483324	0.890822	0	0	0	0
ENSG00000041353	RAB27B	protein_coding	O00194	1.03615	NA	-0.133139	NA	1	1	0	1
ENSG00000041357	PSMA4	protein_coding	P25789	0.368222	0.203478	-0.430211	0.156883	0	1	0	1
ENSG00000041515	MYO16	protein_coding	Q9Y6X6	NA	NA	-0.777548	NA	1	1	0	1
ENSG00000041802	LSG1	protein_coding	Q9H089	0.024747	0.918876	-0.12414	0.578028	1	0	0	1
ENSG00000041880	PARP3	protein_coding	Q9Y6F1	0.253323	0.551282	-0.00824963	0.991361	0	0	0	0
ENSG00000041982	TNC	protein_coding	P24821	0.853169	0.00234546	1.37944	2.1673e-06	1	1	0	1
ENSG00000041988	THAP3	protein_coding	Q8WTV1	0.313475	0.3543	-0.0212923	0.968574	0	0	0	0
ENSG00000042062	FAM65C	protein_coding	#N/A	0.0988816	NA	2.84078	NA	0	0	0	0
ENSG00000042088	TDP1	protein_coding	Q9NUW8	-0.315596	0.0490183	0.0982591	0.733718	1	1	0	1
ENSG00000042286	AIFM2	protein_coding	Q9BRQ8	0.633379	0.00851625	0.00713028	0.987767	1	0	1	0
ENSG00000042304	C2orf83	protein_coding	Q53S99	NA	NA	NA	NA	1	0	0	1
ENSG00000042317	SPATA7	protein_coding	Q9P0W8	-0.564364	0.0531492	-0.160737	0.746238	0	0	0	0
ENSG00000042429	MED17	protein_coding	A0A1W2PRB8	-0.059995	0.883318	0.0865465	0.845189	1	1	0	1
ENSG00000042445	RETSAT	protein_coding	Q6NUM9	-0.14712	0.542084	-0.280246	0.209698	1	1	0	1
ENSG00000042493	CAPG	protein_coding	P40121	0.510422	0.0980277	-0.157242	0.719874	0	0	0	0
ENSG00000042753	AP2S1	protein_coding	P53680	0.336993	0.0453027	-0.357568	0.111659	1	0	0	1
ENSG00000042781	USH2A	protein_coding	O75445	2.84609	NA	0.339344	NA	1	0	0	1
ENSG00000042813	ZPBP	protein_coding	Q9BS86	NA	NA	NA	NA	1	1	0	1
ENSG00000042832	TG	protein_coding	P01266	-2.78261	NA	-2.84878	NA	1	1	0	1
ENSG00000042980	ADAM28	protein_coding	Q9UKQ2	NA	NA	NA	NA	1	1	0	1
ENSG00000043039	BARX2	protein_coding	Q9UMQ3	0.170677	0.719116	-0.00710462	0.991381	0	0	0	0
ENSG00000043093	DCUN1D1	protein_coding	Q96GG9	-0.388545	0.0351699	-0.192551	0.397111	0	0	0	0
ENSG00000043143	JADE2	protein_coding	Q9NQC1	0.507705	0.0729496	0.166826	0.755875	0	0	0	0
ENSG00000043355	ZIC2	protein_coding	O95409	0.495936	0.000101494	0.157906	0.434786	0	0	0	0
ENSG00000043462	LCP2	protein_coding	Q13094	5.04787	NA	3.44886	NA	0	0	0	0
ENSG00000043514	TRIT1	protein_coding	Q9H3H1	0.0201146	0.95372	0.140286	0.628248	0	0	1	0
ENSG00000043591	ADRB1	protein_coding	P08588	0.530118	NA	0.329993	NA	1	0	0	1
ENSG00000044012	GUCA2B	protein_coding	Q16661	1.11731	NA	1.16319	NA	1	1	0	1
ENSG00000044090	CUL7	protein_coding	Q14999	0.0701726	0.836397	0.518091	0.0353835	1	0	0	1
ENSG00000044115	CTNNA1	protein_coding	P35221	0.237723	0.0405548	0.693471	2.90871e-05	1	1	0	1
ENSG00000044446	PHKA2	protein_coding	P46019	-0.24314	0.182696	0.371649	0.0830843	1	0	0	1
ENSG00000044459	CNTLN	protein_coding	Q9NXG0	0.0446244	0.930002	0.266203	0.524273	0	0	0	0
ENSG00000044524	EPHA3	protein_coding	P29320	0.255739	0.546844	0.227253	0.673561	1	1	0	1
ENSG00000044574	HSPA5	protein_coding	P11021	1.30985	4.13448e-21	0.351415	0.0444515	1	1	0	1
ENSG00000046604	DSG2	protein_coding	Q14126	0.426928	2.86033e-05	0.561482	2.36843e-05	1	1	0	1
ENSG00000046647	GEMIN8	protein_coding	Q9NWZ8	0.168137	0.573463	0.172959	0.616469	0	0	0	0
ENSG00000046651	OFD1	protein_coding	O75665	-0.533107	0.0219523	0.165525	0.671248	1	0	0	1
ENSG00000046653	GPM6B	protein_coding	Q13491	0.65897	0.0145953	0.423112	0.163036	1	0	0	1
ENSG00000046774	MAGEC2	protein_coding	Q9UBF1	-2.07583	NA	-2.25639	NA	0	0	0	0
ENSG00000046889	PREX2	protein_coding	Q70Z35	-0.767732	0.00257854	0.140078	0.781174	1	1	0	1
ENSG00000047056	WDR37	protein_coding	Q9Y2I8	-0.670533	9.2353e-06	-0.518172	0.00354094	0	0	0	0
ENSG00000047188	YTHDC2	protein_coding	Q9H6S0	-0.445157	8.07084e-05	0.939122	9.99329e-09	1	0	0	1
ENSG00000047230	CTPS2	protein_coding	Q9NRF8	-0.254252	0.133563	0.407867	0.0284931	0	0	0	0
ENSG00000047249	ATP6V1H	protein_coding	Q9UI12	-0.0925767	0.612755	0.0715892	0.773272	1	0	0	1
ENSG00000047315	POLR2B	protein_coding	P30876	-0.91607	7.51013e-05	0.0518292	0.917468	1	0	0	1
ENSG00000047346	FAM214A	protein_coding	Q32MH5	-0.209686	0.603393	-0.620619	0.0874466	0	0	0	0
ENSG00000047365	ARAP2	protein_coding	Q8WZ64	-0.533942	0.0850459	-0.120305	0.817226	0	0	0	0
ENSG00000047410	TPR	protein_coding	P12270	-0.379882	0.0209902	0.44925	0.00771655	0	0	0	0
ENSG00000047457	CP	protein_coding	P00450	-0.0194417	NA	-0.265963	NA	1	1	0	1
ENSG00000047578	KIAA0556	protein_coding	O60303	-0.136389	0.637413	0.119177	0.744886	1	1	0	1
ENSG00000047579	DTNBP1	protein_coding	Q96EV8	0.257792	0.183487	-0.0338586	0.923468	1	0	0	1
ENSG00000047597	XK	protein_coding	P51811	0.36567	0.57956	0.669919	0.295617	1	1	0	1
ENSG00000047617	ANO2	protein_coding	Q9NQ90	0.443499	NA	-0.714067	NA	1	1	0	1
ENSG00000047621	C12orf4	protein_coding	Q9NQ89	-0.259302	0.138356	0.0784596	0.774972	0	0	0	0
ENSG00000047634	SCML1	protein_coding	Q9UN30	-0.0900434	0.704246	-0.226103	0.313133	0	0	0	0
ENSG00000047644	WWC3	protein_coding	Q9ULE0	-0.620176	NA	0.37854	NA	0	0	0	0
ENSG00000047648	ARHGAP6	protein_coding	O43182	-1.98504	NA	-2.01352	NA	0	1	0	1
ENSG00000047662	FAM184B	protein_coding	#N/A	-0.272525	0.77341	-0.291861	NA	0	0	0	0
ENSG00000047849	MAP4	protein_coding	P27816	0.18842	0.120964	0.111625	0.59683	1	1	0	1
ENSG00000047932	GOPC	protein_coding	Q9HD26	0.0187943	0.945371	0.0966039	0.720705	1	1	0	1
ENSG00000047936	ROS1	protein_coding	P08922	-1.7191	NA	1.11854	NA	1	1	0	1
ENSG00000048028	USP28	protein_coding	Q96RU2	-0.288588	0.0801815	0.256248	0.201192	0	0	0	0
ENSG00000048052	HDAC9	protein_coding	Q9UKV0	-0.32393	0.792808	-0.570122	NA	0	0	0	0
ENSG00000048140	TSPAN17	protein_coding	Q96FV3	-0.0733634	0.841971	0.215782	0.531996	1	0	0	1
ENSG00000048162	NOP16	protein_coding	Q9Y3C1	0.110745	0.67865	-0.13597	0.606911	0	0	0	0
ENSG00000048342	CC2D2A	protein_coding	Q9P2K1	-0.0755747	0.828528	0.699522	0.0188074	0	0	0	0
ENSG00000048392	RRM2B	protein_coding	Q7LG56	-0.460568	0.0138424	-0.0945333	0.781654	0	0	0	0
ENSG00000048405	ZNF800	protein_coding	Q2TB10	-0.210601	0.432359	-0.119442	0.723991	0	0	0	0
ENSG00000048462	TNFRSF17	protein_coding	Q02223	-0.119362	NA	-0.0435167	NA	1	0	0	1
ENSG00000048471	SNX29	protein_coding	Q8TEQ0	-0.19372	0.398598	-0.0865109	0.809925	0	0	0	0
ENSG00000048540	LMO3	protein_coding	Q8TAP4	-3.55918	NA	-1.34068	NA	0	0	0	0
ENSG00000048544	MRPS10	protein_coding	P82664	0.394333	0.127279	0.390409	0.181455	0	0	1	0
ENSG00000048545	GUCA1A	protein_coding	P43080	1.14755	NA	2.12315	NA	0	1	0	1
ENSG00000048649	RSF1	protein_coding	Q96T23	-0.0925055	0.669656	-0.00646835	0.984161	0	1	0	1
ENSG00000048707	VPS13D	protein_coding	Q5THJ4	-0.595275	2.27761e-05	0.0076062	0.98249	0	1	0	1
ENSG00000048740	CELF2	protein_coding	O95319	0.362213	0.0325541	0.201021	0.428336	0	0	0	0
ENSG00000048828	FAM120A	protein_coding	Q9NZB2	-0.109385	0.61194	0.158555	0.458432	1	0	0	1
ENSG00000048991	R3HDM1	protein_coding	Q15032	-0.591779	0.000527416	-0.256535	0.348022	0	0	0	0
ENSG00000049089	COL9A2	protein_coding	Q14055	-1.00006	0.424432	-0.888709	NA	1	1	0	1
ENSG00000049130	KITLG	protein_coding	P21583	-0.131474	0.687573	-0.243412	0.466307	1	1	0	1
ENSG00000049167	ERCC8	protein_coding	Q13216	-0.0947256	0.783303	-0.0237878	0.960747	0	0	0	0
ENSG00000049192	ADAMTS6	protein_coding	Q9UKP5	-0.586748	0.236496	0.179178	0.849375	1	1	0	1
ENSG00000049239	H6PD	protein_coding	O95479	-0.099157	0.776719	0.28261	0.383445	1	1	0	1
ENSG00000049245	VAMP3	protein_coding	Q15836	-0.128149	0.532567	-0.329408	0.0655498	1	0	0	1
ENSG00000049246	PER3	protein_coding	P56645	-0.0293231	0.97737	0.015718	0.987779	0	0	0	0
ENSG00000049247	UTS2	protein_coding	O95399	0.911722	NA	-0.0504392	NA	1	1	0	1
ENSG00000049249	TNFRSF9	protein_coding	Q07011	-0.0363107	0.980504	-0.354642	NA	1	1	0	1
ENSG00000049283	EPN3	protein_coding	Q9H201	-0.770407	0.616421	-0.176058	NA	0	1	0	1
ENSG00000049323	LTBP1	protein_coding	Q14766	0.344027	0.0433472	1.00742	1.5376e-09	1	1	0	1
ENSG00000049449	RCN1	protein_coding	Q15293	0.741548	6.12163e-08	0.448759	0.0180324	1	1	0	1
ENSG00000049540	ELN	protein_coding	P15502	NA	NA	-0.777548	NA	1	1	0	1
ENSG00000049541	RFC2	protein_coding	P35250	-0.233892	0.331363	-0.20175	0.490085	0	1	0	1
ENSG00000049618	ARID1B	protein_coding	Q8NFD5	0.217437	0.13917	0.258151	0.202349	1	0	0	1
ENSG00000049656	CLPTM1L	protein_coding	Q96KA5	-0.920314	0.00103421	-0.175289	0.763355	1	1	0	1
ENSG00000049759	NEDD4L	protein_coding	Q96PU5	-0.0153989	0.96714	-0.0260527	0.95705	1	0	0	1
ENSG00000049768	FOXP3	protein_coding	Q9BZS1	-0.451893	0.747228	-0.0613954	NA	0	0	0	0
ENSG00000049769	PPP1R3F	protein_coding	Q6ZSY5	0.117405	0.852015	-0.0584017	0.945031	1	0	0	1
ENSG00000049860	HEXB	protein_coding	P07686	-0.0959476	0.720586	0.00120005	0.997656	1	1	0	1
ENSG00000049883	PTCD2	protein_coding	Q8WV60	-0.572414	0.00289399	-0.336925	0.194178	0	0	1	0
ENSG00000050030	KIAA2022	protein_coding	#N/A	-0.16716	0.733259	0.542538	0.256982	0	0	0	0
ENSG00000050130	JKAMP	protein_coding	Q9P055	0.141759	0.590021	0.0999714	0.755925	1	1	0	1
ENSG00000050165	DKK3	protein_coding	Q9UBP4	1.18474	0.0268536	0.466644	0.587968	1	1	0	1
ENSG00000050327	ARHGEF5	protein_coding	Q12774	-0.834916	NA	NA	NA	1	1	0	1
ENSG00000050344	NFE2L3	protein_coding	Q9Y4A8	-0.659518	0.0192089	0.426299	0.367113	0	1	0	1
ENSG00000050393	MCUR1	protein_coding	Q96AQ8	-0.162952	0.441945	0.108558	0.73576	0	0	1	0
ENSG00000050405	LIMA1	protein_coding	Q9UHB6	-0.152615	0.32174	0.228831	0.281287	1	1	0	1
ENSG00000050426	LETMD1	protein_coding	Q6P1Q0	0.0728246	0.771879	-0.385105	0.0394197	1	0	1	0
ENSG00000050438	SLC4A8	protein_coding	Q2Y0W8	-0.173906	0.803862	0.916182	NA	1	0	0	1
ENSG00000050555	LAMC3	protein_coding	Q9Y6N6	-0.0110481	0.986927	0.169851	0.787336	1	1	0	1
ENSG00000050628	PTGER3	protein_coding	P43115	-1.82026	NA	-1.42494	NA	1	0	0	1
ENSG00000050730	TNIP3	protein_coding	Q96KP6	0.154682	NA	-3.37161	NA	0	0	0	0
ENSG00000050748	MAPK9	protein_coding	P45984	-0.427174	0.0077655	0.127536	0.632608	0	0	0	0
ENSG00000050767	COL23A1	protein_coding	Q86Y22	0.101738	0.949813	-0.202454	NA	1	0	0	1
ENSG00000050820	BCAR1	protein_coding	P56945	0.641972	4.71608e-05	0.267834	0.155093	1	1	0	1
ENSG00000051009	FAM160A2	protein_coding	Q8N612	-0.0889558	0.729007	-0.149571	0.592695	0	0	0	0
ENSG00000051108	HERPUD1	protein_coding	Q15011	0.35949	0.0392819	-0.164914	0.492932	1	1	0	1
ENSG00000051128	HOMER3	protein_coding	Q9NSC5	0.574991	0.324095	-0.0331444	0.97118	1	1	0	1
ENSG00000051180	RAD51	protein_coding	Q06609	0.0320836	0.911318	-0.272522	0.197652	0	0	0	0
ENSG00000051341	POLQ	protein_coding	O75417	-0.671063	1.96322e-05	-0.27174	0.237911	0	1	0	1
ENSG00000051382	PIK3CB	protein_coding	P42338	-0.626822	0.000988303	-0.201053	0.528929	1	0	0	1
ENSG00000051523	CYBA	protein_coding	P13498	1.14911	1.76458e-14	0.227054	0.256176	1	0	0	1
ENSG00000051596	THOC3	protein_coding	Q96J01	0.0188652	0.957399	0.0840158	0.798326	0	1	0	1
ENSG00000051620	HEBP2	protein_coding	Q9Y5Z4	0.622345	4.8547e-06	-0.195919	0.353728	1	0	0	1
ENSG00000051825	MPHOSPH9	protein_coding	Q99550	-0.487207	6.61398e-05	-0.180685	0.389456	1	1	0	1
ENSG00000052126	PLEKHA5	protein_coding	Q9HAU0	0.0513165	0.836209	0.397314	0.0475398	1	0	0	1
ENSG00000052344	PRSS8	protein_coding	Q16651	0.109532	0.940019	0.899561	NA	1	1	0	1
ENSG00000052723	SIKE1	protein_coding	Q9BRV8	0.0663123	0.762137	-0.127751	0.613545	0	1	0	1
ENSG00000052749	RRP12	protein_coding	Q5JTH9	0.352221	0.00572395	1.02023	1.13496e-14	1	0	0	1
ENSG00000052795	FNIP2	protein_coding	Q9P278	-0.470839	0.056706	0.238861	0.556976	0	0	0	0
ENSG00000052802	MSMO1	protein_coding	Q15800	-0.344811	0.0436954	-0.0373607	0.914313	1	0	0	1
ENSG00000052841	TTC17	protein_coding	Q96AE7	0.0749566	0.756957	0.128926	0.642992	1	1	0	1
ENSG00000052850	ALX4	protein_coding	Q9H161	-0.186103	0.600004	0.424814	0.262642	0	0	0	0
ENSG00000053108	FSTL4	protein_coding	Q6MZW2	0.950885	0.244164	0.811696	NA	1	1	0	1
ENSG00000053254	FOXN3	protein_coding	O00409	-0.379679	0.157315	0.0995341	0.846584	0	1	0	1
ENSG00000053328	METTL24	protein_coding	Q5JXM2	0.0685853	0.963956	-0.241623	NA	1	1	0	1
ENSG00000053371	AKR7A2	protein_coding	O43488	0.182531	0.443208	-0.12748	0.697765	1	0	1	0
ENSG00000053372	MRTO4	protein_coding	Q9UKD2	0.630337	0.000111261	0.257082	0.230915	0	0	0	0
ENSG00000053438	NNAT	protein_coding	Q16517	-0.0418013	0.980196	-0.139632	NA	0	0	0	0
ENSG00000053501	USE1	protein_coding	Q9NZ43	0.802944	2.76644e-05	0.0906742	0.804141	1	0	0	1
ENSG00000053524	MCF2L2	protein_coding	Q86YR7	-0.134523	0.908073	-0.344925	NA	0	1	0	1
ENSG00000053702	NRIP2	protein_coding	Q9BQI9	-0.968755	0.425877	-0.519359	NA	0	0	0	0
ENSG00000053747	LAMA3	protein_coding	Q16787	-0.255199	0.198011	0.36354	0.134836	1	1	0	1
ENSG00000053770	AP5M1	protein_coding	Q9H0R1	-0.446909	0.012691	0.200956	0.467459	1	0	0	1
ENSG00000053900	ANAPC4	protein_coding	Q9UJX5	-0.698751	1.0584e-07	0.323518	0.126016	0	0	0	0
ENSG00000053918	KCNQ1	protein_coding	P51787	0.432688	0.781166	-0.345358	NA	1	0	0	1
ENSG00000054116	TRAPPC3	protein_coding	O43617	-0.222256	0.226105	-0.273107	0.174287	1	1	0	1
ENSG00000054118	THRAP3	protein_coding	Q9Y2W1	0.015535	0.959754	0.543298	0.0093196	0	0	0	0
ENSG00000054148	PHPT1	protein_coding	Q9NRX4	0.0813872	0.652279	-0.25302	0.13388	0	0	0	0
ENSG00000054179	ENTPD2	protein_coding	Q9Y5L3	0.186135	NA	0.700025	NA	1	0	0	1
ENSG00000054219	LY75	protein_coding	O60449	1.11731	NA	1.16319	NA	1	1	0	1
ENSG00000054267	ARID4B	protein_coding	Q4LE39	0.0387847	0.924444	0.385707	0.179588	0	1	0	1
ENSG00000054277	OPN3	protein_coding	Q9H1Y3	-1.00363	NA	-1.48153	NA	1	0	0	1
ENSG00000054282	SDCCAG8	protein_coding	Q86SQ7	-0.674331	0.633213	0.212739	NA	0	0	0	0
ENSG00000054356	PTPRN	protein_coding	Q16849	0.563731	NA	3.02955	NA	1	1	0	1
ENSG00000054392	HHAT	protein_coding	Q5VTY9	NA	NA	-1.92477	NA	1	1	0	1
ENSG00000054523	KIF1B	protein_coding	O60333	-0.130141	0.517514	0.0758668	0.800117	1	0	1	0
ENSG00000054598	FOXC1	protein_coding	Q12948	0.160103	0.373757	-0.21099	0.396322	0	0	0	0
ENSG00000054611	TBC1D22A	protein_coding	Q8WUA7	0.14373	0.681094	0.0964482	0.832444	0	1	0	1
ENSG00000054654	SYNE2	protein_coding	Q8WXH0	-0.406793	0.0562037	0.445183	0.125507	1	0	0	1
ENSG00000054690	PLEKHH1	protein_coding	Q9ULM0	-0.408006	0.051122	0.132233	0.732533	0	0	0	0
ENSG00000054793	ATP9A	protein_coding	O75110	-0.167903	0.418259	0.380099	0.108416	1	0	0	1
ENSG00000054796	SPO11	protein_coding	Q9Y5K1	NA	NA	-0.810278	NA	0	0	0	0
ENSG00000054803	CBLN4	protein_coding	Q9NTU7	1.11731	NA	1.16319	NA	1	1	0	1
ENSG00000054938	CHRDL2	protein_coding	Q6WN34	1.23636	NA	-0.0975409	NA	1	1	0	1
ENSG00000054965	FAM168A	protein_coding	Q92567	-0.562616	0.00909357	-0.313322	0.337361	0	0	0	0
ENSG00000054967	RELT	protein_coding	Q969Z4	0.764286	0.00272777	0.192558	0.640912	1	1	0	1
ENSG00000054983	GALC	protein_coding	P54803	0.294661	0.359236	0.141866	0.761607	1	1	0	1
ENSG00000055044	NOP58	protein_coding	Q9Y2X3	-0.132759	0.543904	0.0539787	0.874136	1	0	0	1
ENSG00000055070	SZRD1	protein_coding	#N/A	-0.229392	0.24175	-0.109803	0.72348	0	0	0	0
ENSG00000055118	KCNH2	protein_coding	Q12809	0.258713	0.656947	0.0440475	0.956756	1	0	0	1
ENSG00000055130	CUL1	protein_coding	Q13616	0.0598015	0.860915	0.315054	0.248661	0	0	0	0
ENSG00000055147	FAM114A2	protein_coding	Q9NRY5	0.127294	0.53117	-0.0879346	0.740111	0	1	0	1
ENSG00000055163	CYFIP2	protein_coding	Q96F07	-0.22434	0.175934	0.30419	0.132219	1	1	0	1
ENSG00000055208	TAB2	protein_coding	Q9NYJ8	-0.14702	0.475145	-0.101734	0.700213	1	0	0	1
ENSG00000055211	GINM1	protein_coding	Q9NU53	-0.152891	0.592627	0.106545	0.767146	1	1	0	1
ENSG00000055332	EIF2AK2	protein_coding	P19525	-0.215689	0.130581	0.476519	0.00177286	1	0	0	1
ENSG00000055483	USP36	protein_coding	Q9P275	-0.161559	0.410969	0.243183	0.277565	0	0	0	0
ENSG00000055609	KMT2C	protein_coding	Q8NEZ4	-0.470852	0.000656703	-0.060383	0.829603	0	0	0	0
ENSG00000055732	MCOLN3	protein_coding	Q8TDD5	-0.377642	0.0796936	0.0798908	0.831863	1	0	0	1
ENSG00000055813	CCDC85A	protein_coding	#N/A	0.343839	NA	1.42784	NA	0	1	0	1
ENSG00000055917	PUM2	protein_coding	Q8TB72	-0.397013	0.00199362	-0.181977	0.3346	0	0	0	0
ENSG00000055950	MRPL43	protein_coding	Q8N983	0.467838	0.0135995	0.0983203	0.742455	0	0	1	0
ENSG00000055955	ITIH4	protein_coding	Q14624	2.47844	NA	0.975903	NA	1	1	0	1
ENSG00000055957	ITIH1	protein_coding	P19827	0.0512766	NA	-0.0939373	NA	1	1	0	1
ENSG00000056050	HPF1	protein_coding	Q9NWY4	-0.0143961	0.959963	0.103414	0.697765	0	0	0	0
ENSG00000056097	ZFR	protein_coding	Q96KR1	-0.027442	0.896929	0.317139	0.0522609	0	0	0	0
ENSG00000056277	ZNF280C	protein_coding	Q8ND82	-0.171237	0.412298	0.0783964	0.794648	0	0	0	0
ENSG00000056291	NPFFR2	protein_coding	Q9Y5X5	0.0460798	0.982276	1.25889	NA	1	1	0	1
ENSG00000056487	PHF21B	protein_coding	Q96EK2	-0.177054	0.703616	0.368369	0.490867	0	0	0	0
ENSG00000056558	TRAF1	protein_coding	Q13077	-0.375334	0.583972	-0.0687118	NA	0	0	0	0
ENSG00000056586	RC3H2	protein_coding	Q9HBD1	-0.415052	0.0263013	-0.48308	0.00531443	1	1	0	1
ENSG00000056736	IL17RB	protein_coding	Q9NRM6	0.405819	0.235615	-0.166373	0.7285	1	0	0	1
ENSG00000056972	TRAF3IP2	protein_coding	O43734	0.343029	0.304144	0.249104	0.560488	0	1	0	1
ENSG00000056998	GYG2	protein_coding	O15488	0.0294099	0.940882	0.035655	0.936546	0	0	0	0
ENSG00000057019	DCBLD2	protein_coding	Q96PD2	0.0971463	0.728853	0.418703	0.0424426	1	1	0	1
ENSG00000057149	SERPINB3	protein_coding	P29508	NA	NA	NA	NA	1	1	0	1
ENSG00000057252	SOAT1	protein_coding	P35610	0.0411729	0.866752	0.155625	0.460831	1	1	0	1
ENSG00000057294	PKP2	protein_coding	Q99959	-0.256282	0.266607	0.189969	0.572198	1	1	0	1
ENSG00000057468	MSH4	protein_coding	O15457	-0.865882	0.358573	-0.450178	NA	0	0	0	0
ENSG00000057593	F7	protein_coding	P08709	-1.73734	NA	-2.77685	NA	1	1	0	1
ENSG00000057608	GDI2	protein_coding	P50395	-0.340773	0.0227728	0.243307	0.195873	1	0	0	1
ENSG00000057657	PRDM1	protein_coding	O75626	0.253489	NA	0.794068	NA	0	0	0	0
ENSG00000057663	ATG5	protein_coding	Q9H1Y0	-0.125329	0.677532	-0.25457	0.393735	1	1	0	1
ENSG00000057704	TMCC3	protein_coding	Q9ULS5	0.3071	0.483847	0.0546721	0.937251	1	1	0	1
ENSG00000057757	PITHD1	protein_coding	Q9GZP4	-0.659606	0.000202348	-0.681964	6.49572e-05	0	0	0	0
ENSG00000057935	MTA3	protein_coding	Q9BTC8	-0.238008	0.334468	0.0404871	0.915813	0	1	0	1
ENSG00000058056	USP13	protein_coding	Q92995	-0.388277	0.0240249	0.181529	0.528405	0	0	0	0
ENSG00000058063	ATP11B	protein_coding	Q9Y2G3	-0.379895	0.0440925	0.451816	0.0458084	1	0	0	1
ENSG00000058085	LAMC2	protein_coding	Q13753	0.0974939	0.911891	-0.415292	0.563635	1	1	0	1
ENSG00000058091	CDK14	protein_coding	O94921	-0.354668	0.331647	-0.0114503	0.985576	1	0	0	1
ENSG00000058262	SEC61A1	protein_coding	P61619	0.63471	1.00639e-08	0.461034	0.000298437	1	1	0	1
ENSG00000058272	PPP1R12A	protein_coding	O14974	0.130994	0.63747	0.487474	0.0256139	0	0	0	0
ENSG00000058335	RASGRF1	protein_coding	Q13972	-0.379771	NA	-0.247335	NA	1	1	0	1
ENSG00000058404	CAMK2B	protein_coding	Q13554	-0.0972662	0.88797	0.0551094	0.95103	1	1	0	1
ENSG00000058453	CROCC	protein_coding	Q5TZA2	0.106572	0.827874	0.415013	0.317193	1	1	0	1
ENSG00000058600	POLR3E	protein_coding	Q9NVU0	0.0428445	0.850236	0.162757	0.457367	0	0	0	0
ENSG00000058668	ATP2B4	protein_coding	P23634	0.244312	0.140017	0.459781	0.0115415	1	1	0	1
ENSG00000058673	ZC3H11A	protein_coding	O75152	-0.481375	0.00027994	-0.238354	0.241195	0	0	0	0
ENSG00000058729	RIOK2	protein_coding	Q9BVS4	-0.574268	0.00994146	-0.204135	0.466307	0	1	0	1
ENSG00000058799	YIPF1	protein_coding	Q9Y548	0.395444	0.0622429	0.21626	0.45864	1	0	0	1
ENSG00000058804	NDC1	protein_coding	Q9BTX1	-0.27869	0.205553	0.208451	0.458894	1	1	0	1
ENSG00000058866	DGKG	protein_coding	P49619	0.858247	NA	0.833871	NA	1	1	0	1
ENSG00000059122	FLYWCH1	protein_coding	Q4VC44	0.394184	0.0187215	0.185436	0.386526	0	0	0	0
ENSG00000059145	UNKL	protein_coding	Q9H9P5	0.0965171	0.739022	0.0229874	0.95705	0	0	0	0
ENSG00000059377	TBXAS1	protein_coding	P24557	0.684547	0.211544	-0.0279607	0.975603	1	1	0	1
ENSG00000059378	PARP12	protein_coding	Q9H0J9	-1.95802	NA	-0.925379	NA	0	0	0	0
ENSG00000059573	ALDH18A1	protein_coding	P54886	-0.167787	0.357229	0.415992	0.0153863	0	0	1	0
ENSG00000059588	TARBP1	protein_coding	Q13395	-0.646241	2.48273e-09	0.359887	0.0287324	0	0	0	0
ENSG00000059691	GATB	protein_coding	O75879	0.0478815	0.866999	0.115521	0.697765	0	0	1	0
ENSG00000059728	MXD1	protein_coding	Q05195	-0.0210591	0.95901	-0.53746	0.0468857	0	0	0	0
ENSG00000059758	CDK17	protein_coding	Q00537	-0.448217	0.00421335	-0.110643	0.726134	0	0	0	0
ENSG00000059769	DNAJC25	protein_coding	Q9H1X3	0.818547	0.000195641	0.31685	0.344027	1	0	0	1
ENSG00000059804	SLC2A3	protein_coding	P11169	0.50499	0.076342	0.148453	0.742455	1	1	0	1
ENSG00000059915	PSD	protein_coding	A5PKW4	-0.632759	0.263264	-0.504253	0.473116	0	1	0	1
ENSG00000060069	CTDP1	protein_coding	Q9Y5B0	-0.0113454	0.985614	0.0589157	0.928972	0	1	0	1
ENSG00000060138	YBX3	protein_coding	P16989	-0.0825784	0.719116	0.0974948	0.713019	0	0	0	0
ENSG00000060140	STYK1	protein_coding	Q6J9G0	-1.0305	0.249077	-0.272295	NA	1	1	0	1
ENSG00000060237	WNK1	protein_coding	Q9H4A3	-0.137938	0.359881	0.0521849	0.828644	1	1	0	1
ENSG00000060303	RPS17P5	processed_pseudogene	#N/A	-0.378459	0.833893	-0.191559	NA	0	0	0	0
ENSG00000060339	CCAR1	protein_coding	Q8IX12	0.0430662	0.926296	0.372691	0.269144	0	1	0	1
ENSG00000060491	OGFR	protein_coding	Q9NZT2	0.228589	0.199224	-0.023824	0.950778	1	0	0	1
ENSG00000060558	GNA15	protein_coding	P30679	0.912134	NA	-0.0129654	NA	1	0	0	1
ENSG00000060566	CREB3L3	protein_coding	Q68CJ9	1.18354	NA	0.469529	NA	1	0	0	1
ENSG00000060642	PIGV	protein_coding	Q9NUD9	-0.184845	0.623404	-0.0232961	0.967478	1	1	0	1
ENSG00000060656	PTPRU	protein_coding	Q92729	-0.00294903	0.9924	0.0587058	0.858481	1	0	0	1
ENSG00000060688	SNRNP40	protein_coding	Q96DI7	-0.0781825	0.64752	-0.111787	0.583028	0	0	0	0
ENSG00000060709	RIMBP2	protein_coding	O15034	-2.48674	NA	-2.39344	NA	1	0	0	1
ENSG00000060718	COL11A1	protein_coding	P12107	2.6757	NA	2.72318	NA	1	1	0	1
ENSG00000060749	QSER1	protein_coding	#N/A	-0.347354	0.0350378	0.0926435	0.760814	0	0	0	0
ENSG00000060762	MPC1	protein_coding	Q9Y5U8	0.0833712	0.719993	0.0368122	0.914488	0	0	1	0
ENSG00000060971	ACAA1	protein_coding	P09110	0.547035	0.000838637	-0.0439881	0.87347	1	1	1	1
ENSG00000060982	BCAT1	protein_coding	P54687	-0.0439685	0.830943	0.268294	0.138141	0	0	0	0
ENSG00000061273	HDAC7	protein_coding	Q8WUI4	-0.022971	0.952641	0.0461647	0.907314	0	0	0	0
ENSG00000061337	LZTS1	protein_coding	Q9Y250	0.443237	0.663188	0.325163	NA	0	1	0	1
ENSG00000061455	PRDM6	protein_coding	Q9NQX0	-0.0572646	0.906322	0.0549838	0.929591	0	0	0	0
ENSG00000061492	WNT8A	protein_coding	Q9H1J5	2.07783	NA	1.17941	NA	1	1	0	1
ENSG00000061656	SPAG4	protein_coding	Q9NPE6	-0.13257	0.859519	-0.386737	0.611473	1	0	0	1
ENSG00000061676	NCKAP1	protein_coding	Q9Y2A7	0.111791	0.53116	0.211719	0.244264	1	0	0	1
ENSG00000061794	MRPS35	protein_coding	P82673	0.133299	0.479053	0.22293	0.2994	0	0	1	0
ENSG00000061918	GUCY1B3	protein_coding	#N/A	0.409209	0.00399287	0.270742	0.210408	0	0	0	0
ENSG00000061936	SFSWAP	protein_coding	Q12872	0.242167	0.308053	0.0725952	0.836118	0	1	0	1
ENSG00000061938	TNK2	protein_coding	Q07912	0.118676	0.681934	0.10232	0.765931	1	0	0	1
ENSG00000061987	MON2	protein_coding	Q7Z3U7	-0.139021	0.540927	0.538944	0.00357343	0	0	0	0
ENSG00000062038	CDH3	protein_coding	P22223	-0.0248143	0.987536	-0.105994	NA	1	1	0	1
ENSG00000062096	ARSF	protein_coding	P54793	NA	NA	NA	NA	1	0	0	1
ENSG00000062194	GPBP1	protein_coding	Q86WP2	-0.177629	0.467543	-0.377839	0.0820481	1	1	0	1
ENSG00000062282	DGAT2	protein_coding	Q96PD7	0.360687	0.613314	0.113807	0.908696	1	0	0	1
ENSG00000062370	ZNF112	protein_coding	Q9UJU3	-0.793695	0.296855	-0.412426	NA	0	0	0	0
ENSG00000062485	CS	protein_coding	O75390	-0.395648	0.128237	-0.095117	0.816948	0	0	1	0
ENSG00000062524	LTK	protein_coding	P29376	0.637239	0.340512	0.179552	0.835749	1	1	0	1
ENSG00000062582	MRPS24	protein_coding	Q96EL2	0.554468	0.382297	-0.195212	0.811533	0	1	1	1
ENSG00000062598	ELMO2	protein_coding	Q96JJ3	0.298205	0.119348	-0.0375145	0.917928	1	0	0	1
ENSG00000062650	WAPL	protein_coding	Q7Z5K2	-0.353114	0.00148581	-0.15213	0.371195	0	0	0	0
ENSG00000062716	VMP1	protein_coding	Q96GC9	-0.611561	8.27253e-05	0.279279	0.165732	1	1	0	1
ENSG00000062725	APPBP2	protein_coding	Q92624	0.0455442	0.936615	-0.300003	0.525852	0	0	0	0
ENSG00000062822	POLD1	protein_coding	P28340	0.464544	0.00042436	0.564897	0.000739505	1	0	0	1
ENSG00000063015	SEZ6	protein_coding	Q53EL9	-4.37334	NA	-4.77153	NA	1	0	0	1
ENSG00000063046	EIF4B	protein_coding	P23588	-0.0459827	0.889932	-0.0178216	0.966911	0	0	0	0
ENSG00000063127	SLC6A16	protein_coding	Q9GZN6	-0.171115	0.78174	-0.358144	0.540566	1	1	0	1
ENSG00000063169	GLTSCR1	protein_coding	#N/A	-0.442503	0.0317823	-0.102443	0.787521	0	0	0	0
ENSG00000063176	SPHK2	protein_coding	Q9NRA0	0.237669	0.505757	0.00340962	0.994816	1	1	0	1
ENSG00000063177	RPL18	protein_coding	Q07020	0.988889	2.30086e-13	-0.223329	0.323434	1	1	0	1
ENSG00000063180	CA11	protein_coding	O75493	0.297913	0.366366	0.0307919	0.950778	1	1	0	1
ENSG00000063241	ISOC2	protein_coding	Q96AB3	0.584065	0.000125023	0.186515	0.491088	0	0	1	0
ENSG00000063244	U2AF2	protein_coding	P26368	0.428566	0.000728149	0.135218	0.497503	0	0	0	0
ENSG00000063245	EPN1	protein_coding	Q9Y6I3	0.337714	0.0613593	0.0969043	0.709743	1	0	0	1
ENSG00000063322	MED29	protein_coding	Q9NX70	0.226315	0.325333	-0.387421	0.100757	0	0	0	0
ENSG00000063438	AHRR	protein_coding	A9YTQ3	-0.226436	0.322657	-0.254808	0.413789	0	0	0	0
ENSG00000063515	GSC2	protein_coding	O15499	2.1027	NA	2.15231	NA	0	0	0	0
ENSG00000063587	ZNF275	protein_coding	Q9NSD4	-0.0638509	0.819347	0.0496884	0.897742	0	0	0	0
ENSG00000063601	MTMR1	protein_coding	Q13613	0.38231	0.0533103	0.230751	0.353938	1	0	0	1
ENSG00000063660	GPC1	protein_coding	P35052	0.633992	5.24354e-06	0.38923	0.0652564	1	1	0	1
ENSG00000063761	ADCK1	protein_coding	Q86TW2	0.0409356	0.897338	0.141954	0.673561	1	1	1	1
ENSG00000063854	HAGH	protein_coding	Q16775	0.862323	3.00819e-09	0.144785	0.597901	0	0	1	0
ENSG00000063978	RNF4	protein_coding	P78317	-0.190365	0.424041	-0.420621	0.0580995	0	0	0	0
ENSG00000064012	CASP8	protein_coding	Q14790	-0.0806669	0.738808	-0.116222	0.720446	0	0	1	0
ENSG00000064042	LIMCH1	protein_coding	Q9UPQ0	0.0506671	0.94542	0.441168	0.502152	0	0	0	0
ENSG00000064102	ASUN	protein_coding	#N/A	-0.394573	0.0290816	0.067006	0.812169	0	0	0	0
ENSG00000064115	TM7SF3	protein_coding	Q9NS93	-0.061152	0.833893	0.0683856	0.853032	1	1	0	1
ENSG00000064195	DLX3	protein_coding	O60479	-0.129832	NA	-1.56323	NA	0	0	0	0
ENSG00000064199	SPA17	protein_coding	Q15506	-0.443373	0.177925	-0.691889	0.0797061	0	1	0	1
ENSG00000064201	TSPAN32	protein_coding	Q96QS1	-1.73734	NA	-2.01212	NA	1	0	0	1
ENSG00000064205	WISP2	protein_coding	O76076	1.65528	NA	0.701423	NA	1	1	0	1
ENSG00000064218	DMRT3	protein_coding	Q9NQL9	0.126823	0.916591	0.230877	NA	0	0	0	0
ENSG00000064225	ST3GAL6	protein_coding	Q9Y274	0.507597	0.0479645	0.128338	0.74989	1	0	0	1
ENSG00000064270	ATP2C2	protein_coding	O75185	0.0397105	NA	1.05807	NA	1	1	0	1
ENSG00000064300	NGFR	protein_coding	P08138	0.835942	0.407939	0.44499	NA	1	1	0	1
ENSG00000064309	CDON	protein_coding	Q4KMG0	0.388591	0.0130716	0.473966	0.0049693	1	1	0	1
ENSG00000064313	TAF2	protein_coding	Q6P1X5	-0.431095	0.00778003	0.0881394	0.764339	0	0	0	0
ENSG00000064393	HIPK2	protein_coding	Q9H2X6	-0.629311	1.42796e-05	-0.159711	0.527114	0	0	0	0
ENSG00000064419	TNPO3	protein_coding	Q9Y5L0	0.0012229	0.996523	0.178262	0.408662	0	1	0	1
ENSG00000064489	BORCS8-MEF2B	protein_coding	H3BNR1	NA	NA	NA	NA	0	0	0	0
ENSG00000064490	RFXANK	protein_coding	O14593	0.868398	0.00027666	0.0381424	0.931647	0	0	0	0
ENSG00000064545	TMEM161A	protein_coding	Q9NX61	0.833291	4.34635e-12	0.511293	0.000237597	1	0	0	1
ENSG00000064547	LPAR2	protein_coding	Q9HBW0	-0.576818	0.386225	-0.512867	NA	1	0	0	1
ENSG00000064601	CTSA	protein_coding	P10619	0.541057	0.000782621	0.509876	0.00501252	1	1	0	1
ENSG00000064607	SUGP2	protein_coding	Q8IX01	-0.0352637	0.853729	0.301746	0.0743506	0	0	0	0
ENSG00000064651	SLC12A2	protein_coding	P55011	-0.179488	0.329534	0.47989	0.0055923	1	1	0	1
ENSG00000064652	SNX24	protein_coding	Q9Y343	-0.475404	0.308487	0.00798361	0.992297	0	1	0	1
ENSG00000064655	EYA2	protein_coding	O00167	0.253182	0.467923	0.520979	0.129681	0	0	0	0
ENSG00000064666	CNN2	protein_coding	Q99439	0.361971	0.0296115	-0.078726	0.804494	1	0	0	1
ENSG00000064687	ABCA7	protein_coding	Q8IZY2	0.201685	0.433344	0.145629	0.673616	1	1	0	1
ENSG00000064692	SNCAIP	protein_coding	Q9Y6H5	0.348224	0.635982	0.515271	0.504109	0	0	0	0
ENSG00000064703	DDX20	protein_coding	Q9UHI6	-0.150862	0.387637	0.181555	0.405309	1	1	0	1
ENSG00000064726	BTBD1	protein_coding	Q9H0C5	-0.0616736	0.792201	-0.00954889	0.975603	0	0	0	0
ENSG00000064763	FAR2	protein_coding	Q96K12	0.280632	0.244348	0.4372	0.0718676	1	1	0	1
ENSG00000064787	BCAS1	protein_coding	O75363	-0.453845	NA	0.263079	NA	0	1	0	1
ENSG00000064835	POU1F1	protein_coding	P28069	NA	NA	NA	NA	0	0	0	0
ENSG00000064886	CHI3L2	protein_coding	Q15782	-2.31944	NA	-0.777548	NA	1	1	0	1
ENSG00000064932	SBNO2	protein_coding	Q9Y2G9	-0.995735	NA	-1.38378	NA	0	0	0	0
ENSG00000064933	PMS1	protein_coding	P54277	-0.444996	0.00167932	0.289661	0.238665	0	0	0	0
ENSG00000064961	HMG20B	protein_coding	Q9P0W2	0.104312	0.689855	0.4073	0.0878955	0	0	0	0
ENSG00000064989	CALCRL	protein_coding	Q16602	0.122543	0.899668	0.177057	NA	1	1	0	1
ENSG00000064995	TAF11	protein_coding	Q15544	0.0810633	0.819776	-0.182347	0.591799	1	1	0	1
ENSG00000064999	ANKS1A	protein_coding	Q92625	0.202109	0.296147	0.143788	0.519796	0	0	0	0
ENSG00000065000	AP3D1	protein_coding	O14617	-0.208258	0.114892	0.196763	0.269555	1	0	0	1
ENSG00000065029	ZNF76	protein_coding	P36508	0.0294071	0.937582	0.18119	0.600048	0	0	0	0
ENSG00000065054	SLC9A3R2	protein_coding	Q15599	-0.289325	0.223893	0.0304802	0.948014	1	1	0	1
ENSG00000065057	NTHL1	protein_coding	P78549	0.612957	1.54978e-06	0.335398	0.0724349	0	0	1	0
ENSG00000065060	UHRF1BP1	protein_coding	Q6BDS2	-0.480811	0.00665891	-0.13338	0.653366	0	0	0	0
ENSG00000065135	GNAI3	protein_coding	P08754	-0.228036	0.36341	0.0743709	0.844063	1	0	0	1
ENSG00000065150	IPO5	protein_coding	O00410	-0.105172	0.610074	0.418614	0.016525	1	0	0	1
ENSG00000065154	OAT	protein_coding	P04181	0.173406	0.386646	-0.0341418	0.921745	0	0	1	0
ENSG00000065183	WDR3	protein_coding	Q9UNX4	-0.140456	0.37975	0.62466	0.000168673	0	0	0	0
ENSG00000065243	PKN2	protein_coding	Q16513	-0.272812	0.055841	0.244985	0.197933	1	1	0	1
ENSG00000065268	WDR18	protein_coding	Q9BV38	0.140581	0.457402	0.145983	0.521762	0	0	0	0
ENSG00000065308	TRAM2	protein_coding	Q15035	0.87639	1.72458e-06	0.110728	0.745849	1	0	0	1
ENSG00000065320	NTN1	protein_coding	O95631	0.502612	0.00995373	0.61702	0.0037011	1	1	0	1
ENSG00000065325	GLP2R	protein_coding	O95838	NA	NA	-0.777548	NA	1	1	0	1
ENSG00000065328	MCM10	protein_coding	Q7L590	0.0830352	0.671587	0.0749378	0.80177	0	0	0	0
ENSG00000065357	DGKA	protein_coding	P23743	0.169812	0.602902	0.548851	0.0586484	1	1	0	1
ENSG00000065361	ERBB3	protein_coding	P21860	-0.311722	0.339755	0.0931948	0.870809	1	1	0	1
ENSG00000065371	ROPN1	protein_coding	Q9HAT0	NA	NA	-0.777548	NA	0	0	0	0
ENSG00000065413	ANKRD44	protein_coding	Q8N8A2	-1.37826	0.268389	0.0396874	NA	0	0	0	0
ENSG00000065427	KARS	protein_coding	Q15046	0.104796	0.667508	0.00694089	0.984539	1	0	1	0
ENSG00000065457	ADAT1	protein_coding	Q9BUB4	-0.379732	0.0843359	-0.0102683	0.981256	0	0	0	0
ENSG00000065485	PDIA5	protein_coding	Q14554	0.670481	1.7e-06	0.397495	0.0344112	1	1	0	1
ENSG00000065491	TBC1D22B	protein_coding	Q9NU19	-0.223627	0.569482	0.0185257	0.975647	0	0	0	0
ENSG00000065518	NDUFB4	protein_coding	O95168	0.776694	0.000582025	-0.33781	0.265101	1	0	1	0
ENSG00000065526	SPEN	protein_coding	Q96T58	-0.300165	0.0438021	-0.0209005	0.956839	0	0	0	0
ENSG00000065534	MYLK	protein_coding	Q15746	-0.122478	0.777719	-0.0464842	0.937669	1	1	0	1
ENSG00000065548	ZC3H15	protein_coding	Q8WU90	0.281492	0.704599	0.395703	0.618105	0	0	0	0
ENSG00000065559	MAP2K4	protein_coding	P45985	-0.0929543	0.673406	0.060254	0.85449	0	1	0	1
ENSG00000065600	TMEM206	protein_coding	Q9H813	0.623085	0.000349671	0.439514	0.0314366	1	0	0	1
ENSG00000065609	SNAP91	protein_coding	O60641	-0.309785	0.496963	-0.0659374	0.927064	1	0	0	1
ENSG00000065613	SLK	protein_coding	Q9H2G2	-0.238803	0.221399	-0.114379	0.697263	0	1	0	1
ENSG00000065615	CYB5R4	protein_coding	Q7L1T6	-0.243738	0.402887	0.225794	0.556976	1	0	0	1
ENSG00000065618	COL17A1	protein_coding	Q9UMD9	-1.16172	NA	-0.832354	NA	1	1	0	1
ENSG00000065621	GSTO2	protein_coding	Q9H4Y5	-0.0943662	0.880988	-0.11012	0.88586	0	0	0	0
ENSG00000065665	SEC61A2	protein_coding	Q9H9S3	0.0454836	0.900572	0.0857905	0.823461	1	0	0	1
ENSG00000065675	PRKCQ	protein_coding	Q04759	-0.235876	0.296981	0.340706	0.264591	1	0	0	1
ENSG00000065717	TLE2	protein_coding	Q04725	0.0880366	0.877958	-0.245805	0.649448	1	0	0	1
ENSG00000065802	ASB1	protein_coding	Q9Y576	0.1483	0.565147	0.139255	0.667552	0	0	0	0
ENSG00000065809	FAM107B	protein_coding	#N/A	-0.291805	0.254764	-0.185371	0.598829	0	1	0	1
ENSG00000065833	ME1	protein_coding	P48163	0.024276	0.947271	-0.126516	0.667513	0	1	1	1
ENSG00000065882	TBC1D1	protein_coding	Q86TI0	-0.161606	0.635349	-0.105447	0.815891	0	0	0	0
ENSG00000065883	CDK13	protein_coding	Q14004	-0.588481	0.00287906	0.263316	0.374911	1	0	0	1
ENSG00000065911	MTHFD2	protein_coding	P13995	-0.0955219	0.723096	-0.349828	0.104385	1	1	1	1
ENSG00000065923	SLC9A7	protein_coding	Q96T83	0.293594	0.280402	0.310351	0.348295	1	1	0	1
ENSG00000065970	FOXJ2	protein_coding	Q9P0K8	0.0487208	0.925785	-0.226388	0.630469	0	0	0	0
ENSG00000065978	YBX1	protein_coding	P67809	0.279822	0.174928	-0.302071	0.143246	1	1	0	1
ENSG00000065989	PDE4A	protein_coding	P27815	-0.481976	0.219089	-0.16652	0.80177	1	1	0	1
ENSG00000066027	PPP2R5A	protein_coding	Q15172	0.765157	6.99225e-06	-0.0218421	0.955025	1	0	0	1
ENSG00000066032	CTNNA2	protein_coding	P26232	-0.619427	NA	-0.364434	NA	0	0	0	0
ENSG00000066044	ELAVL1	protein_coding	Q15717	0.213749	0.169704	-0.0161586	0.959849	1	0	0	1
ENSG00000066056	TIE1	protein_coding	P35590	0.378116	NA	1.99266	NA	1	1	0	1
ENSG00000066084	DIP2B	protein_coding	Q9P265	-0.00427638	0.986927	0.255486	0.253816	1	1	0	1
ENSG00000066117	SMARCD1	protein_coding	Q96GM5	0.223496	0.241768	-0.146512	0.574736	0	1	0	1
ENSG00000066135	KDM4A	protein_coding	O75164	-0.00610309	0.980162	0.3288	0.0641184	0	0	0	0
ENSG00000066136	NFYC	protein_coding	Q13952	-0.18099	0.49095	-0.182942	0.561556	0	0	0	0
ENSG00000066185	ZMYND12	protein_coding	Q9H0C1	0.520624	NA	-0.320563	NA	0	0	0	0
ENSG00000066230	SLC9A3	protein_coding	P48764	0.378249	0.535781	-0.0804111	0.927319	1	1	0	1
ENSG00000066248	NGEF	protein_coding	Q8N5V2	0.411178	0.0860322	0.219414	0.467727	1	1	0	1
ENSG00000066279	ASPM	protein_coding	Q8IZT6	-0.765925	1.62564e-05	0.432656	0.0723922	0	1	0	1
ENSG00000066294	CD84	protein_coding	Q9UIB8	NA	NA	NA	NA	1	0	0	1
ENSG00000066322	ELOVL1	protein_coding	Q9BW60	0.760963	1.12528e-09	0.0389433	0.893224	1	1	0	1
ENSG00000066336	SPI1	protein_coding	P17947	1.11354	NA	0.509738	NA	0	0	0	0
ENSG00000066379	ZNRD1	protein_coding	Q9P1U0	1.72386	NA	-1.02267	NA	0	0	0	0
ENSG00000066382	MPPED2	protein_coding	Q15777	0.0188839	0.984949	0.211958	0.807999	0	1	0	1
ENSG00000066405	CLDN18	protein_coding	P56856	-0.694987	NA	-0.983411	NA	1	0	0	1
ENSG00000066422	ZBTB11	protein_coding	O95625	-0.0120213	0.963894	0.73916	2.91736e-06	0	0	0	0
ENSG00000066427	ATXN3	protein_coding	P54252	-0.0982434	0.704599	-0.188114	0.504519	1	1	0	1
ENSG00000066455	GOLGA5	protein_coding	Q8TBA6	-0.100014	0.681015	-0.221999	0.317675	1	1	0	1
ENSG00000066468	FGFR2	protein_coding	P21802	-0.0382648	0.913883	0.457767	0.027078	1	1	0	1
ENSG00000066557	LRRC40	protein_coding	Q9H9A6	-0.206855	0.252477	0.0992983	0.705815	1	0	0	1
ENSG00000066583	ISOC1	protein_coding	Q96CN7	0.53866	0.0101197	-0.0568977	0.894819	1	1	0	1
ENSG00000066629	EML1	protein_coding	O00423	-0.108132	0.671211	0.229906	0.464971	0	0	0	0
ENSG00000066651	TRMT11	protein_coding	Q7Z4G4	-0.596381	0.0250287	0.100907	0.800765	0	0	1	0
ENSG00000066654	THUMPD1	protein_coding	Q9NXG2	-0.027379	0.930002	-0.362172	0.0765312	0	0	0	0
ENSG00000066697	MSANTD3	protein_coding	Q96H12	-0.564119	0.0699858	0.0636058	0.914313	0	0	0	0
ENSG00000066735	KIF26A	protein_coding	Q9ULI4	0.0969902	0.800777	0.167142	0.73863	0	1	0	1
ENSG00000066739	ATG2B	protein_coding	Q96BY7	-0.442268	0.00301032	0.0787841	0.784242	0	0	0	0
ENSG00000066777	ARFGEF1	protein_coding	Q9Y6D6	-0.38425	0.0159086	0.297942	0.156686	1	1	0	1
ENSG00000066813	ACSM2B	protein_coding	Q68CK6	NA	NA	NA	NA	0	0	0	0
ENSG00000066827	ZFAT	protein_coding	Q9P243	-0.0675877	0.856679	0.164773	0.675202	0	0	0	0
ENSG00000066855	MTFR1	protein_coding	Q15390	-0.361158	0.0858354	0.0722901	0.836105	1	0	1	0
ENSG00000066923	STAG3	protein_coding	Q9UJ98	0.240123	0.820516	0.787347	NA	1	0	0	1
ENSG00000066926	FECH	protein_coding	P22830	0.443258	0.0127331	0.201791	0.430793	0	0	1	0
ENSG00000066933	MYO9A	protein_coding	B2RTY4	-0.313204	0.0373743	-0.173665	0.499353	1	1	0	1
ENSG00000067048	DDX3Y	protein_coding	O15523	0.614317	0.625006	0.644979	NA	1	0	0	1
ENSG00000067057	PFKP	protein_coding	Q01813	0.0805268	0.69589	0.338797	0.0621256	1	1	0	1
ENSG00000067064	IDI1	protein_coding	Q13907	-0.486333	0.0297781	-0.791284	0.000138274	1	0	1	0
ENSG00000067066	SP100	protein_coding	P23497	0.304392	NA	0.172277	NA	0	0	0	0
ENSG00000067082	KLF6	protein_coding	Q99612	0.249523	0.217712	-0.102612	0.678269	0	1	0	1
ENSG00000067113	PLPP1	protein_coding	O14494	1.21331	2.21059e-09	0.336936	0.223138	1	1	0	1
ENSG00000067141	NEO1	protein_coding	Q92859	0.646244	2.98718e-08	0.575791	8.51083e-05	1	1	0	1
ENSG00000067167	TRAM1	protein_coding	Q15629	-0.0432994	0.911318	-0.0838203	0.844664	1	0	0	1
ENSG00000067177	PHKA1	protein_coding	P46020	-0.523117	0.000113371	0.270628	0.224661	1	1	0	1
ENSG00000067182	TNFRSF1A	protein_coding	P19438	0.363137	0.0306045	0.0328754	0.928946	1	1	0	1
ENSG00000067191	CACNB1	protein_coding	Q02641	0.106664	0.871416	-0.140681	0.838736	1	0	0	1
ENSG00000067208	EVI5	protein_coding	O60447	-0.322793	0.050878	-0.0287903	0.93276	1	1	0	1
ENSG00000067221	STOML1	protein_coding	Q9UBI4	0.145474	0.735401	0.301846	0.518746	1	0	1	0
ENSG00000067225	PKM	protein_coding	P14618	-0.122291	0.592435	0.324025	0.134317	1	0	0	1
ENSG00000067248	DHX29	protein_coding	Q7Z478	-0.276768	0.107243	0.674781	3.66805e-05	0	1	0	1
ENSG00000067334	DNTTIP2	protein_coding	Q5QJE6	-0.11236	0.715193	-0.38739	0.122534	0	0	0	0
ENSG00000067365	METTL22	protein_coding	Q9BUU2	-0.0508583	0.908073	-0.335432	0.3346	0	0	0	0
ENSG00000067369	TP53BP1	protein_coding	Q12888	-0.166733	0.417069	0.326696	0.112161	0	0	0	0
ENSG00000067445	TRO	protein_coding	Q12816	0.0849086	0.74986	0.553855	0.0286239	0	0	0	0
ENSG00000067533	RRP15	protein_coding	Q9Y3B9	-0.0367888	0.906362	0.166346	0.553575	0	0	0	0
ENSG00000067560	RHOA	protein_coding	P61586	0.706813	0.000160887	-0.0234232	0.956734	1	0	0	1
ENSG00000067596	DHX8	protein_coding	Q14562	0.156389	0.347215	0.324519	0.154293	0	1	0	1
ENSG00000067601	PMS2P4	transcribed_unprocessed_pseudogene	#N/A	-0.181819	0.765895	-0.448267	0.417068	0	0	0	0
ENSG00000067606	PRKCZ	protein_coding	Q05513	0.370539	0.0908131	0.0637352	0.871543	1	1	0	1
ENSG00000067646	ZFY	protein_coding	P08048	2.07708	0.0647439	-0.351414	NA	0	0	0	0
ENSG00000067704	IARS2	protein_coding	Q9NSE4	-0.553524	3.89498e-05	0.195642	0.332762	0	0	1	0
ENSG00000067715	SYT1	protein_coding	P21579	0.798529	6.6236e-05	0.356639	0.200883	1	0	0	1
ENSG00000067798	NAV3	protein_coding	Q8IVL0	0.160958	NA	-0.238597	NA	0	0	0	0
ENSG00000067829	IDH3G	protein_coding	P51553	-0.0232604	0.953721	-0.026106	0.95246	0	0	1	0
ENSG00000067836	ROGDI	protein_coding	Q9GZN7	0.513916	0.0723402	-0.0152605	0.980545	0	0	0	0
ENSG00000067840	PDZD4	protein_coding	Q76G19	-0.0674611	0.907511	-0.103811	0.883878	0	0	0	0
ENSG00000067842	ATP2B3	protein_coding	Q16720	0.759372	0.300706	0.147465	NA	1	1	0	1
ENSG00000067900	ROCK1	protein_coding	Q13464	-0.344975	0.0114954	0.190886	0.319649	1	0	0	1
ENSG00000067955	CBFB	protein_coding	Q13951	0.104777	0.594627	0.0297465	0.933842	1	0	0	1
ENSG00000067992	PDK3	protein_coding	Q15120	-0.150248	0.527021	0.201927	0.463654	0	0	1	0
ENSG00000068001	HYAL2	protein_coding	Q12891	0.518147	0.0138564	0.435178	0.113836	1	1	0	1
ENSG00000068024	HDAC4	protein_coding	P56524	-0.18428	0.554811	-0.124971	0.774557	0	0	0	0
ENSG00000068028	RASSF1	protein_coding	Q9NS23	0.0950305	0.72989	-0.475858	0.0208039	0	0	0	0
ENSG00000068078	FGFR3	protein_coding	P22607	-0.00598787	0.989379	-0.229929	0.416608	1	1	0	1
ENSG00000068079	IFI35	protein_coding	P80217	-0.133499	0.876117	-0.505287	0.473083	0	0	0	0
ENSG00000068097	HEATR6	protein_coding	Q6AI08	0.679299	0.000882173	0.264762	0.37405	0	0	0	0
ENSG00000068120	COASY	protein_coding	Q13057	0.0653384	0.766636	0.00701732	0.984012	0	1	1	1
ENSG00000068137	PLEKHH3	protein_coding	Q7Z736	0.4073	0.0304144	0.104384	0.745629	1	1	0	1
ENSG00000068305	MEF2A	protein_coding	Q02078	0.0404737	0.865285	-0.00316935	0.991457	0	0	0	0
ENSG00000068308	OTUD5	protein_coding	Q96G74	0.26052	0.158541	-0.0788235	0.775056	0	0	0	0
ENSG00000068323	TFE3	protein_coding	P19532	0.385576	0.0307496	-0.192098	0.423521	0	0	0	0
ENSG00000068354	TBC1D25	protein_coding	Q3MII6	0.235822	0.399474	-0.101654	0.791252	1	0	0	1
ENSG00000068366	ACSL4	protein_coding	O60488	-0.427938	0.0113971	0.490306	0.0123463	1	1	1	1
ENSG00000068383	INPP5A	protein_coding	Q14642	0.46625	0.0135186	0.336812	0.081958	1	1	0	1
ENSG00000068394	GPKOW	protein_coding	Q92917	0.469493	0.0261868	0.220947	0.451505	0	0	0	0
ENSG00000068400	GRIPAP1	protein_coding	Q4V328	-0.086712	0.698953	0.271146	0.219293	0	1	0	1
ENSG00000068438	FTSJ1	protein_coding	Q9UET6	0.166284	0.461247	0.00491095	0.989101	0	0	0	0
ENSG00000068489	PRR11	protein_coding	Q96HE9	0.148849	0.6762	-0.283856	0.404925	1	1	0	1
ENSG00000068615	REEP1	protein_coding	Q9H902	0.0166002	0.970887	0.103632	0.792833	1	0	0	1
ENSG00000068650	ATP11A	protein_coding	P98196	-0.241735	0.292654	0.209166	0.587968	1	1	0	1
ENSG00000068654	POLR1A	protein_coding	O95602	-0.0764078	0.685696	0.399796	0.0158525	0	0	0	0
ENSG00000068697	LAPTM4A	protein_coding	Q15012	0.282741	0.0472181	-0.064401	0.804241	1	1	0	1
ENSG00000068724	TTC7A	protein_coding	Q9ULT0	-0.000914351	0.999175	0.120987	0.809168	1	0	0	1
ENSG00000068745	IP6K2	protein_coding	Q9UHH9	-0.194601	0.178277	-0.593128	7.82622e-06	0	1	0	1
ENSG00000068781	STON1-GTF2A1L	protein_coding	Q53S48	3.2234	NA	3.26705	NA	1	0	0	1
ENSG00000068784	SRBD1	protein_coding	Q8N5C6	-0.390522	0.00377798	0.662715	1.90238e-06	0	0	0	0
ENSG00000068796	KIF2A	protein_coding	O00139	-0.192841	0.230031	0.0869952	0.697765	1	0	0	1
ENSG00000068831	RASGRP2	protein_coding	Q7LDG7	0.523534	0.277205	0.292628	0.677968	1	0	0	1
ENSG00000068878	PSME4	protein_coding	Q14997	-0.489442	0.00103699	0.197961	0.368364	0	0	0	0
ENSG00000068885	IFT80	protein_coding	Q9P2H3	-0.514121	0.0145266	-0.0414988	0.928972	0	0	0	0
ENSG00000068903	SIRT2	protein_coding	Q8IXJ6	NA	NA	NA	NA	1	0	0	1
ENSG00000068912	ERLEC1	protein_coding	Q96DZ1	-0.0260881	0.944472	-0.0141948	0.974575	1	1	0	1
ENSG00000068971	PPP2R5B	protein_coding	Q15173	0.102486	0.823815	0.10768	0.827339	0	0	0	0
ENSG00000068976	PYGM	protein_coding	P11217	-0.690935	0.138205	-0.86203	0.110743	0	0	0	0
ENSG00000068985	PAGE1	protein_coding	O75459	-0.783402	NA	-0.737275	NA	0	0	0	0
ENSG00000069011	PITX1	protein_coding	P78337	-0.228359	0.281067	-0.17344	0.574826	0	0	0	0
ENSG00000069018	TRPC7	protein_coding	Q9HCX4	0.912482	NA	-1.78813	NA	1	0	0	1
ENSG00000069020	MAST4	protein_coding	O15021	-0.455774	0.0796067	0.0663562	0.904962	0	0	0	0
ENSG00000069122	ADGRF5	protein_coding	Q8IZF2	0.81561	NA	2.73902	NA	1	0	0	1
ENSG00000069188	SDK2	protein_coding	Q58EX2	0.257754	0.223443	0.496853	0.0182701	1	0	0	1
ENSG00000069206	ADAM7	protein_coding	Q9H2U9	NA	NA	NA	NA	1	1	0	1
ENSG00000069248	NUP133	protein_coding	Q8WUM0	-0.248435	0.148163	0.579711	0.000598977	1	0	0	1
ENSG00000069275	NUCKS1	protein_coding	Q9H1E3	-0.142134	0.653776	0.493591	0.0382817	0	0	0	0
ENSG00000069329	VPS35	protein_coding	Q96QK1	0.136905	0.315423	0.358238	0.0153863	1	1	0	1
ENSG00000069345	DNAJA2	protein_coding	O60884	-0.0615051	0.733633	0.34335	0.0127223	1	0	0	1
ENSG00000069399	BCL3	protein_coding	P20749	-0.205328	0.877047	0.199254	NA	1	1	0	1
ENSG00000069424	KCNAB2	protein_coding	Q13303	-0.0362918	0.968545	0.844303	0.237037	1	0	0	1
ENSG00000069431	ABCC9	protein_coding	O60706	-0.445044	0.715193	1.00098	NA	1	0	0	1
ENSG00000069482	GAL	protein_coding	P22466	0.536862	4.12551e-05	0.0695956	0.792833	1	1	0	1
ENSG00000069493	CLEC2D	protein_coding	Q9UHP7	-1.67603	0.00343984	-0.72671	NA	1	1	0	1
ENSG00000069509	FUNDC1	protein_coding	Q8IVP5	0.0412413	0.88317	0.0423576	0.904241	0	0	1	0
ENSG00000069535	MAOB	protein_coding	P27338	-0.344535	0.773229	-0.217108	NA	1	0	1	0
ENSG00000069667	RORA	protein_coding	P35398	-0.327062	0.345851	-0.303347	0.526872	0	0	0	0
ENSG00000069696	DRD4	protein_coding	P21917	NA	NA	NA	NA	1	0	0	1
ENSG00000069702	TGFBR3	protein_coding	Q03167	0.215812	0.264723	0.563222	0.00206204	1	1	0	1
ENSG00000069712	KIAA1107	protein_coding	Q9UPP5	NA	NA	NA	NA	0	0	0	0
ENSG00000069764	PLA2G10	protein_coding	O15496	NA	NA	NA	NA	1	1	0	1
ENSG00000069812	HES2	protein_coding	Q9Y543	-0.591637	NA	0.239665	NA	0	0	0	0
ENSG00000069849	ATP1B3	protein_coding	P54709	0.20608	0.355105	-0.018264	0.962405	1	1	0	1
ENSG00000069869	NEDD4	protein_coding	P46934	-0.076782	0.816564	0.499767	0.0418987	1	0	0	1
ENSG00000069943	PIGB	protein_coding	Q92521	0.24434	0.59839	0.313861	0.526709	1	1	0	1
ENSG00000069956	MAPK6	protein_coding	Q16659	0.726754	2.17776e-05	-0.0834818	0.796021	0	0	0	0
ENSG00000069966	GNB5	protein_coding	O14775	0.524876	0.00150309	0.0764306	0.828081	1	0	0	1
ENSG00000069974	RAB27A	protein_coding	P51159	-0.373666	0.419344	0.232302	0.735465	1	0	0	1
ENSG00000069998	CECR5	protein_coding	Q9BXW7	0.354659	0.00725783	0.0908322	0.694748	0	1	1	1
ENSG00000070010	UFD1L	protein_coding	#N/A	0.459855	0.0036011	0.152511	0.560822	0	1	0	1
ENSG00000070018	LRP6	protein_coding	O75581	NA	NA	NA	NA	1	0	0	1
ENSG00000070019	GUCY2C	protein_coding	P25092	-0.0686225	NA	0.569357	NA	1	1	0	1
ENSG00000070031	SCT	protein_coding	P09683	NA	NA	NA	NA	1	1	0	1
ENSG00000070047	PHRF1	protein_coding	Q9P1Y6	0.953736	0.517885	1.10966	NA	1	0	0	1
ENSG00000070061	IKBKAP	protein_coding	#N/A	-0.135627	0.318218	0.639808	1.14507e-06	0	0	0	0
ENSG00000070081	NUCB2	protein_coding	P80303	0.630207	0.0133798	0.79402	0.00178833	1	1	1	1
ENSG00000070087	PFN2	protein_coding	P35080	0.181653	0.170543	0.0449372	0.868378	0	0	0	0
ENSG00000070159	PTPN3	protein_coding	P26045	0.296387	0.209017	0.046724	0.905893	1	0	0	1
ENSG00000070182	SPTB	protein_coding	P11277	-0.00248633	0.995143	0.247607	0.501754	1	1	0	1
ENSG00000070190	DAPP1	protein_coding	Q9UN19	-1.86914	NA	-3.88996	NA	1	0	0	1
ENSG00000070193	FGF10	protein_coding	O15520	NA	NA	NA	NA	1	1	0	1
ENSG00000070214	SLC44A1	protein_coding	Q8WWI5	0.34386	0.0568898	0.334983	0.124284	1	0	0	1
ENSG00000070269	TMEM260	protein_coding	Q9NX78	-0.228566	0.567416	0.0107109	0.987248	1	0	0	1
ENSG00000070366	SMG6	protein_coding	Q86US8	0.0363081	0.908003	0.162406	0.604244	0	1	0	1
ENSG00000070367	EXOC5	protein_coding	O00471	-0.28869	0.18607	-0.125518	0.688203	0	0	0	0
ENSG00000070371	CLTCL1	protein_coding	P53675	-0.0697232	0.756305	0.752919	8.36757e-07	1	1	0	1
ENSG00000070388	FGF22	protein_coding	Q9HCT0	-0.414149	0.835583	-0.465053	NA	1	1	0	1
ENSG00000070404	FSTL3	protein_coding	O95633	0.181207	0.791177	0.282603	0.705652	1	1	0	1
ENSG00000070413	DGCR2	protein_coding	P98153	0.0437467	0.87721	0.0908934	0.776678	1	0	0	1
ENSG00000070423	RNF126	protein_coding	Q9BV68	0.225397	0.123144	0.250417	0.160128	0	0	0	0
ENSG00000070444	MNT	protein_coding	Q99583	0.000750638	0.998955	0.366594	0.181178	0	0	0	0
ENSG00000070476	ZXDC	protein_coding	Q2QGD7	0.188452	0.347215	0.179994	0.481172	0	1	0	1
ENSG00000070495	JMJD6	protein_coding	Q6NYC1	0.173559	0.263027	-0.251073	0.136237	1	0	0	1
ENSG00000070501	POLB	protein_coding	P06746	-0.436234	0.0419357	-0.345731	0.231138	0	1	0	1
ENSG00000070526	ST6GALNAC1	protein_coding	Q9NSC7	-2.27846	NA	-1.9202	NA	1	0	0	1
ENSG00000070540	WIPI1	protein_coding	Q5MNZ9	0.579687	0.225016	-0.086869	0.913982	1	0	0	1
ENSG00000070601	FRMPD1	protein_coding	Q5SYB0	0.68191	0.317793	0.314258	NA	1	0	0	1
ENSG00000070610	GBA2	protein_coding	Q9HCG7	-0.342136	0.026237	0.129643	0.596957	1	1	0	1
ENSG00000070614	NDST1	protein_coding	P52848	-0.274589	0.10005	0.11462	0.728025	1	0	0	1
ENSG00000070669	ASNS	protein_coding	P08243	-0.608118	1.54148e-06	0.128173	0.575179	0	0	0	0
ENSG00000070718	AP3M2	protein_coding	P53677	0.289785	0.0915896	0.0207133	0.951858	1	0	0	1
ENSG00000070729	CNGB1	protein_coding	Q14028	1.37232	NA	-0.0435167	NA	1	1	0	1
ENSG00000070731	ST6GALNAC2	protein_coding	Q9UJ37	0.170942	0.885401	0.0866244	NA	1	1	0	1
ENSG00000070748	CHAT	protein_coding	P28329	1.07291	NA	1.11854	NA	0	0	0	0
ENSG00000070756	PABPC1	protein_coding	P11940	0.117504	0.359031	0.638527	9.75618e-07	1	0	0	1
ENSG00000070759	TESK2	protein_coding	Q96S53	-0.323126	0.478356	-0.298484	0.579405	0	0	0	0
ENSG00000070761	CFAP20	protein_coding	Q9Y6A4	-0.0400519	0.888685	-0.463839	0.0123384	0	0	0	0
ENSG00000070770	CSNK2A2	protein_coding	P19784	-0.134466	0.730649	-0.120342	0.787521	1	1	0	1
ENSG00000070778	PTPN21	protein_coding	Q16825	-0.670428	0.0728174	0.150162	0.837888	0	1	0	1
ENSG00000070785	EIF2B3	protein_coding	Q9NR50	-0.118333	0.621233	0.248825	0.243433	0	1	0	1
ENSG00000070808	CAMK2A	protein_coding	Q9UQM7	-0.834916	NA	NA	NA	1	1	0	1
ENSG00000070814	TCOF1	protein_coding	Q13428	0.164007	0.284785	0.458761	0.00283049	0	0	0	0
ENSG00000070831	CDC42	protein_coding	P60953	0.00282972	0.995811	-0.685549	0.0335983	1	0	0	1
ENSG00000070882	OSBPL3	protein_coding	Q9H4L5	-0.275272	0.203063	0.367469	0.140871	1	0	0	1
ENSG00000070886	EPHA8	protein_coding	P29322	0.554145	0.209001	0.342613	0.506622	1	1	0	1
ENSG00000070915	SLC12A3	protein_coding	P55017	-0.195577	NA	0.165811	NA	1	0	0	1
ENSG00000070950	RAD18	protein_coding	Q9NS91	0.133456	0.540316	-0.103223	0.704421	0	0	0	0
ENSG00000070961	ATP2B1	protein_coding	P20020	0.110631	0.492734	0.578114	3.98244e-06	1	1	0	1
ENSG00000070985	TRPM5	protein_coding	Q9NZQ8	-1.59647	NA	-0.425003	NA	1	0	0	1
ENSG00000071051	NCK2	protein_coding	O43639	-0.228042	0.399011	0.0973803	0.817248	1	0	0	1
ENSG00000071054	MAP4K4	protein_coding	O95819	-0.0670884	0.797532	0.331358	0.119934	0	0	0	0
ENSG00000071073	MGAT4A	protein_coding	Q9UM21	-0.0481203	0.896162	0.0858273	0.831914	1	1	0	1
ENSG00000071082	RPL31	protein_coding	P62899	0.866499	0.000112258	-0.508874	0.0521178	1	0	0	1
ENSG00000071127	WDR1	protein_coding	O75083	0.307289	0.0879431	0.38058	0.0683268	1	1	0	1
ENSG00000071189	SNX13	protein_coding	Q9Y5W8	-0.242553	0.276097	-0.25575	0.341965	0	0	0	0
ENSG00000071203	MS4A12	protein_coding	Q9NXJ0	NA	NA	NA	NA	1	0	0	1
ENSG00000071205	ARHGAP10	protein_coding	A1A4S6	0.141323	0.583734	0.603139	0.00136544	1	0	0	1
ENSG00000071242	RPS6KA2	protein_coding	Q15349	-0.0206759	0.963441	0.129118	0.757905	0	0	0	0
ENSG00000071243	ING3	protein_coding	Q9NXR8	0.0114914	0.971384	-0.129322	0.651787	0	0	0	0
ENSG00000071246	VASH1	protein_coding	Q7L8A9	-0.304224	0.440286	-0.108558	0.872953	1	1	0	1
ENSG00000071282	LMCD1	protein_coding	Q9NZU5	0.824011	0.000860053	0.139337	0.741222	0	1	0	1
ENSG00000071462	WBSCR22	protein_coding	#N/A	0.750277	1.78649e-07	-0.0387217	0.899264	0	0	0	0
ENSG00000071537	SEL1L	protein_coding	Q9UBV2	0.226215	0.238982	0.288882	0.204136	1	1	0	1
ENSG00000071539	TRIP13	protein_coding	Q15645	-0.168529	0.434975	0.0518965	0.872953	0	0	0	0
ENSG00000071553	ATP6AP1	protein_coding	Q15904	0.858496	1.20051e-09	0.0940849	0.737642	1	1	0	1
ENSG00000071564	TCF3	protein_coding	P15923	0.162098	0.399011	-0.020603	0.948973	0	0	0	0
ENSG00000071575	TRIB2	protein_coding	Q92519	0.0922351	0.882912	0.266646	0.650203	0	0	0	0
ENSG00000071626	DAZAP1	protein_coding	Q96EP5	-0.144413	0.301912	0.198346	0.229003	0	0	0	0
ENSG00000071655	MBD3	protein_coding	O95983	0.262477	0.0976138	-0.0780794	0.823461	0	0	0	0
ENSG00000071677	PRLH	protein_coding	P81277	NA	NA	NA	NA	1	1	0	1
ENSG00000071794	HLTF	protein_coding	Q14527	-0.404414	0.00636941	0.553538	0.000102136	1	0	0	1
ENSG00000071859	FAM50A	protein_coding	Q14320	0.456711	4.84213e-05	0.1855	0.326302	0	0	0	0
ENSG00000071889	FAM3A	protein_coding	P98173	0.279609	0.113019	-0.0556113	0.859319	1	0	0	1
ENSG00000071894	CPSF1	protein_coding	Q10570	0.381988	0.0182967	0.266064	0.200883	0	0	0	0
ENSG00000071909	MYO3B	protein_coding	Q8WXR4	-1.15245	NA	1.39405	NA	0	0	0	0
ENSG00000071967	CYBRD1	protein_coding	Q53TN4	0.310834	0.545164	0.100998	0.888082	1	1	0	1
ENSG00000071991	CDH19	protein_coding	Q9H159	NA	NA	NA	NA	1	1	0	1
ENSG00000071994	PDCD2	protein_coding	Q16342	0.46962	0.0104498	0.0436313	0.902961	0	0	0	0
ENSG00000072041	SLC6A15	protein_coding	Q9H2J7	0.150446	0.361401	0.367915	0.026185	1	1	0	1
ENSG00000072042	RDH11	protein_coding	Q8TC12	0.462968	0.000343925	0.0308437	0.914313	1	1	1	1
ENSG00000072062	PRKACA	protein_coding	P17612	0.271434	0.0681091	-0.162091	0.464503	1	0	0	1
ENSG00000072071	ADGRL1	protein_coding	O94910	0.263347	0.169189	0.112353	0.707913	1	0	0	1
ENSG00000072080	SPP2	protein_coding	Q13103	-1.86914	NA	-2.65307	NA	1	1	0	1
ENSG00000072110	ACTN1	protein_coding	P12814	0.377813	0.00102716	0.343678	0.0180344	1	1	0	1
ENSG00000072121	ZFYVE26	protein_coding	Q68DK2	-0.635048	1.1878e-05	0.008138	0.982223	1	0	0	1
ENSG00000072133	RPS6KA6	protein_coding	Q9UK32	-0.91409	0.00184599	-0.274398	0.592074	0	0	0	0
ENSG00000072134	EPN2	protein_coding	O95208	0.443939	0.013651	-0.24538	0.352444	0	1	0	1
ENSG00000072135	PTPN18	protein_coding	Q99952	0.374472	0.0307496	0.193846	0.435654	0	0	0	0
ENSG00000072163	LIMS2	protein_coding	Q7Z4I7	0.611492	0.592435	1.22309	NA	1	0	0	1
ENSG00000072182	ASIC4	protein_coding	Q96FT7	0.284081	0.888305	0.0145006	NA	1	0	0	1
ENSG00000072195	SPEG	protein_coding	Q15772	0.511523	0.184033	-0.352556	0.435599	0	1	0	1
ENSG00000072201	LNX1	protein_coding	Q8TBB1	0.93091	NA	1.24184	NA	0	1	0	1
ENSG00000072210	ALDH3A2	protein_coding	P51648	0.0784945	0.71656	-0.0375978	0.906314	1	0	1	0
ENSG00000072274	TFRC	protein_coding	P02786	-0.0612915	0.790841	0.177889	0.40995	1	1	0	1
ENSG00000072310	SREBF1	protein_coding	P36956	0.134243	0.586184	0.59517	0.00102539	1	1	0	1
ENSG00000072315	TRPC5	protein_coding	Q9UL62	-1.86914	NA	-0.777548	NA	1	0	0	1
ENSG00000072364	AFF4	protein_coding	Q9UHB7	-0.176372	0.323906	-0.29613	0.107935	0	0	0	0
ENSG00000072401	UBE2D1	protein_coding	P51668	-0.0983694	0.770108	-0.279132	0.341678	0	1	0	1
ENSG00000072415	MPP5	protein_coding	Q8N3R9	-0.485046	0.00197713	-0.0449832	0.901057	1	1	0	1
ENSG00000072422	RHOBTB1	protein_coding	O94844	-0.302059	0.301344	0.143028	0.75463	1	0	0	1
ENSG00000072501	SMC1A	protein_coding	Q14683	-0.102594	0.62388	0.889751	3.73426e-08	0	0	0	0
ENSG00000072506	HSD17B10	protein_coding	Q99714	0.857315	7.08383e-10	-0.259983	0.16086	1	0	1	0
ENSG00000072518	MARK2	protein_coding	Q7KZI7	0.171432	0.392917	0.271314	0.177648	1	1	0	1
ENSG00000072571	HMMR	protein_coding	O75330	-0.118224	0.523603	0.464545	0.010205	1	0	0	1
ENSG00000072609	CHFR	protein_coding	Q96EP1	0.0614585	0.827176	0.0470708	0.899264	0	0	0	0
ENSG00000072657	TRHDE	protein_coding	Q9UKU6	-1.1661	NA	-0.942533	NA	1	0	0	1
ENSG00000072682	P4HA2	protein_coding	O15460	0.681622	5.1787e-07	0.630381	5.5735e-05	1	1	0	1
ENSG00000072694	FCGR2B	protein_coding	P31994	-0.834916	NA	-0.777548	NA	1	0	0	1
ENSG00000072736	NFATC3	protein_coding	Q12968	-0.161795	0.623344	-0.256948	0.459497	0	0	0	0
ENSG00000072756	TRNT1	protein_coding	Q96Q11	-0.206001	0.394778	0.0681918	0.874817	0	0	1	0
ENSG00000072778	ACADVL	protein_coding	P49748	0.361984	0.0207233	0.200938	0.29957	0	0	1	0
ENSG00000072786	STK10	protein_coding	O94804	0.294258	0.243183	0.388413	0.137146	1	0	0	1
ENSG00000072803	FBXW11	protein_coding	Q9UKB1	-0.0302143	0.879002	0.136944	0.481568	0	1	0	1
ENSG00000072818	ACAP1	protein_coding	Q15027	-0.596119	0.504826	-0.410936	NA	1	1	0	1
ENSG00000072832	CRMP1	protein_coding	Q14194	0.61898	0.0797668	0.721194	0.0731776	0	0	0	0
ENSG00000072840	EVC	protein_coding	P57679	-0.402366	0.267909	-0.0809974	0.90348	1	0	0	1
ENSG00000072849	DERL2	protein_coding	Q9GZP9	-0.124404	0.534893	-0.163779	0.46448	1	1	0	1
ENSG00000072858	SIDT1	protein_coding	Q9NXL6	0.492078	0.439529	0.264968	0.733718	1	0	0	1
ENSG00000072864	NDE1	protein_coding	Q9NXR1	NA	NA	-0.810278	NA	1	0	0	1
ENSG00000072952	MRVI1	protein_coding	Q9Y6F6	-1.46705	NA	-0.439013	NA	1	0	0	1
ENSG00000072954	TMEM38A	protein_coding	Q9H6F2	0.567609	0.254327	-0.345153	0.568768	1	0	0	1
ENSG00000072958	AP1M1	protein_coding	Q9BXS5	0.339801	0.00853994	0.0397265	0.884317	1	0	0	1
ENSG00000073008	PVR	protein_coding	P15151	0.396095	0.032555	0.301123	0.198403	1	1	0	1
ENSG00000073050	XRCC1	protein_coding	P18887	0.314233	0.11446	0.747096	0.00018976	0	0	0	0
ENSG00000073060	SCARB1	protein_coding	Q8WTV0	0.310807	0.0368762	0.408559	0.0156744	1	1	0	1
ENSG00000073067	CYP2W1	protein_coding	Q8TAV3	-1.00138	NA	-0.284809	NA	1	1	0	1
ENSG00000073111	MCM2	protein_coding	P49736	0.242127	0.146615	1.1986	1.12502e-06	0	0	0	0
ENSG00000073146	MOV10L1	protein_coding	Q9BXT6	-0.834916	NA	-2.41748	NA	0	0	0	0
ENSG00000073150	PANX2	protein_coding	Q96RD6	0.339819	0.502584	0.0149085	0.98481	1	1	0	1
ENSG00000073169	SELENOO	protein_coding	Q9BVL4	0.0491464	0.857989	-0.0509897	0.894819	0	1	1	1
ENSG00000073282	TP63	protein_coding	Q9H3D4	NA	NA	NA	NA	1	1	0	1
ENSG00000073331	ALPK1	protein_coding	Q96QP1	-0.128576	0.797042	0.223923	0.707913	0	0	0	0
ENSG00000073350	LLGL2	protein_coding	Q6P1M3	0.0549155	0.909598	0.0701628	0.898648	1	1	0	1
ENSG00000073417	PDE8A	protein_coding	O60658	-0.382588	0.0712637	-0.118931	0.741234	0	1	0	1
ENSG00000073464	CLCN4	protein_coding	P51793	-0.152146	NA	0.465257	NA	1	1	0	1
ENSG00000073536	NLE1	protein_coding	Q9NVX2	0.307998	0.0247867	0.163826	0.419205	0	0	0	0
ENSG00000073578	SDHA	protein_coding	P31040	-0.121631	0.558339	-0.15536	0.540526	0	0	1	0
ENSG00000073584	SMARCE1	protein_coding	Q969G3	-0.360856	0.340512	-0.103116	0.858981	0	0	0	0
ENSG00000073598	FNDC8	protein_coding	Q8TC99	1.10127	NA	0.563661	NA	0	0	0	0
ENSG00000073605	GSDMB	protein_coding	Q8TAX9	-0.700522	0.170094	-0.159861	0.876385	1	0	0	1
ENSG00000073614	KDM5A	protein_coding	P29375	0.134722	0.351396	-0.162876	0.379611	0	0	0	0
ENSG00000073670	ADAM11	protein_coding	O75078	0.171143	0.628372	0.297185	0.540526	1	0	0	1
ENSG00000073711	PPP2R3A	protein_coding	Q06190	-0.577523	0.0244539	-0.0802494	0.872964	0	1	0	1
ENSG00000073712	FERMT2	protein_coding	Q96AC1	-0.155904	0.301144	0.199624	0.369909	0	0	0	0
ENSG00000073734	ABCB11	protein_coding	O95342	NA	NA	NA	NA	1	1	0	1
ENSG00000073737	DHRS9	protein_coding	Q9BPW9	-1.24358	NA	0.2546	NA	1	1	0	1
ENSG00000073754	CD5L	protein_coding	O43866	NA	NA	-2.66624	NA	1	1	0	1
ENSG00000073756	PTGS2	protein_coding	P35354	0.303893	0.525223	-0.00290999	0.996602	1	1	0	1
ENSG00000073792	IGF2BP2	protein_coding	Q9Y6M1	0.0409686	0.880988	0.197616	0.436028	0	0	0	0
ENSG00000073803	MAP3K13	protein_coding	O43283	-0.777281	0.00755989	-0.651933	0.0500577	1	0	0	1
ENSG00000073849	ST6GAL1	protein_coding	P15907	0.147039	0.696394	0.244871	0.562304	1	1	0	1
ENSG00000073861	TBX21	protein_coding	Q9UL17	0.227822	NA	-0.465186	NA	0	0	0	0
ENSG00000073905	VDAC1P1	processed_pseudogene	#N/A	-0.524335	0.020205	0.00719544	0.987274	0	0	1	0
ENSG00000073910	FRY	protein_coding	Q5TBA9	-0.230097	0.584117	0.427177	0.343631	0	0	0	0
ENSG00000073921	PICALM	protein_coding	Q13492	-0.00184214	0.994894	-0.0545419	0.861634	1	1	0	1
ENSG00000073969	NSF	protein_coding	P46459	3.72408	NA	2.21872	NA	1	0	0	1
ENSG00000074047	GLI2	protein_coding	P10070	-0.0442234	0.933362	0.292074	0.541743	1	0	0	1
ENSG00000074054	CLASP1	protein_coding	Q7Z460	0.0708759	0.765186	0.391139	0.0399152	1	0	0	1
ENSG00000074071	MRPS34	protein_coding	P82930	0.828804	1.05119e-11	0.106945	0.606162	0	0	1	0
ENSG00000074181	NOTCH3	protein_coding	Q9UM47	0.492733	0.00269439	0.510626	0.00919723	1	1	0	1
ENSG00000074201	CLNS1A	protein_coding	P54105	0.0989903	0.615823	0.036063	0.9083	1	0	0	1
ENSG00000074211	PPP2R2C	protein_coding	Q9Y2T4	-0.340271	0.601973	-0.120859	0.910846	0	0	0	0
ENSG00000074219	TEAD2	protein_coding	Q15562	-0.116751	0.675386	0.110393	0.783217	0	0	0	0
ENSG00000074266	EED	protein_coding	O75530	-0.0673128	0.810002	-0.251211	0.318827	0	0	0	0
ENSG00000074276	CDHR2	protein_coding	Q9BYE9	-0.875372	0.266607	-0.806393	NA	0	0	0	0
ENSG00000074317	SNCB	protein_coding	Q16143	0.43314	0.174928	-0.247707	0.583903	0	0	0	0
ENSG00000074319	TSG101	protein_coding	Q99816	-0.0154915	0.967554	0.00818864	0.984263	1	1	0	1
ENSG00000074356	NCBP3	protein_coding	Q53F19	-0.0366057	0.872598	-0.0387792	0.883057	0	0	0	0
ENSG00000074370	ATP2A3	protein_coding	Q93084	0.956922	1.08108e-09	0.278976	0.220256	1	0	0	1
ENSG00000074410	CA12	protein_coding	O43570	-0.0775348	0.930002	-0.334387	0.661558	1	1	0	1
ENSG00000074416	MGLL	protein_coding	Q99685	0.541803	0.514938	0.391295	NA	1	0	0	1
ENSG00000074527	NTN4	protein_coding	Q9HB63	0.591156	0.298955	0.384175	0.656183	1	1	0	1
ENSG00000074582	BCS1L	protein_coding	Q9Y276	-0.083159	0.674582	-0.190006	0.336453	1	0	1	0
ENSG00000074590	NUAK1	protein_coding	O60285	-0.296507	0.32494	0.235086	0.546266	0	0	0	0
ENSG00000074603	DPP8	protein_coding	Q6V1X1	-0.171035	0.433673	-0.00316955	0.992823	0	0	0	0
ENSG00000074621	SLC24A1	protein_coding	O60721	0.172615	0.777939	0.330495	0.571015	1	0	0	1
ENSG00000074657	ZNF532	protein_coding	Q9HCE3	-0.318011	0.495129	-0.243165	0.707633	0	1	0	1
ENSG00000074660	SCARF1	protein_coding	Q14162	NA	NA	NA	NA	1	1	0	1
ENSG00000074695	LMAN1	protein_coding	P49257	0.251079	0.0345799	0.526874	8.39011e-05	1	0	0	1
ENSG00000074696	HACD3	protein_coding	Q9P035	0.683535	0.000148362	0.181297	0.510175	1	1	0	1
ENSG00000074706	IPCEF1	protein_coding	Q8WWN9	-0.848049	0.489511	-1.32566	NA	1	1	0	1
ENSG00000074755	ZZEF1	protein_coding	O43149	-0.293524	0.0290404	0.260263	0.139181	0	0	0	0
ENSG00000074771	NOX3	protein_coding	Q9HBY0	NA	NA	NA	NA	1	1	0	1
ENSG00000074800	ENO1	protein_coding	P06733	0.857999	9.06821e-08	0.381937	0.0724737	1	1	0	1
ENSG00000074803	SLC12A1	protein_coding	Q13621	2.77393	NA	2.81992	NA	1	1	0	1
ENSG00000074842	MYDGF	protein_coding	Q969H8	0.526534	4.3465e-05	-0.123513	0.625619	1	1	0	1
ENSG00000074855	ANO8	protein_coding	Q9HCE9	0.50659	0.016316	0.0272611	0.948973	1	0	0	1
ENSG00000074935	TUBE1	protein_coding	Q9UJT0	-0.0670872	0.783825	-0.26373	0.194843	0	0	0	0
ENSG00000074964	ARHGEF10L	protein_coding	Q9HCE6	0.151873	0.752219	0.434675	0.34764	0	1	0	1
ENSG00000074966	TXK	protein_coding	P42681	-0.197995	NA	0.167265	NA	1	1	0	1
ENSG00000075035	WSCD2	protein_coding	Q2TBF2	NA	NA	NA	NA	1	1	0	1
ENSG00000075043	KCNQ2	protein_coding	O43526	0.319859	0.636023	0.223012	0.795531	1	1	0	1
ENSG00000075073	TACR2	protein_coding	P21452	-1.87996	NA	-1.19602	NA	1	1	0	1
ENSG00000075089	ACTR6	protein_coding	Q9GZN1	-0.483248	0.00348084	-0.0983898	0.757553	0	1	0	1
ENSG00000075131	TIPIN	protein_coding	Q9BVW5	-0.293649	0.0445887	-0.123972	0.570935	0	1	0	1
ENSG00000075142	SRI	protein_coding	P30626	0.428043	0.00967343	0.285026	0.201075	1	0	0	1
ENSG00000075151	EIF4G3	protein_coding	O43432	0.0572188	0.783298	0.663104	1.57283e-05	0	0	0	0
ENSG00000075188	NUP37	protein_coding	Q8NFH4	-0.635559	0.00167793	-0.0741174	0.845388	0	0	0	0
ENSG00000075213	SEMA3A	protein_coding	Q14563	0.653866	0.00602464	0.761018	0.0024412	1	1	0	1
ENSG00000075218	GTSE1	protein_coding	Q9NYZ3	0.172095	0.333775	-0.0927016	0.714498	1	1	0	1
ENSG00000075223	SEMA3C	protein_coding	Q99985	0.368525	0.081974	0.557909	0.0090148	1	1	0	1
ENSG00000075234	TTC38	protein_coding	Q5R3I4	0.0791395	0.81005	0.103032	0.748699	0	0	0	0
ENSG00000075239	ACAT1	protein_coding	P24752	-0.328757	0.0122185	0.0582286	0.816627	0	0	1	0
ENSG00000075240	GRAMD4	protein_coding	Q6IC98	0.163463	0.602671	0.106522	0.798587	1	0	0	1
ENSG00000075275	CELSR1	protein_coding	Q9NYQ6	-0.271515	0.14637	0.269862	0.329119	1	1	0	1
ENSG00000075290	WNT8B	protein_coding	Q93098	-0.386283	NA	-0.986765	NA	1	1	0	1
ENSG00000075292	ZNF638	protein_coding	Q14966	-0.269982	0.03161	0.372603	0.0388777	0	1	0	1
ENSG00000075303	SLC25A40	protein_coding	Q8TBP6	-0.349298	0.174928	-0.0697781	0.859953	1	0	1	0
ENSG00000075336	TIMM21	protein_coding	Q9BVV7	0.206998	0.334468	-0.290065	0.16365	1	0	1	0
ENSG00000075340	ADD2	protein_coding	P35612	-0.354393	0.0892694	-0.113535	0.711863	1	1	0	1
ENSG00000075388	FGF4	protein_coding	P08620	-0.834916	NA	NA	NA	1	1	0	1
ENSG00000075391	RASAL2	protein_coding	Q9UJF2	-0.0469096	0.872598	0.211565	0.495973	0	1	0	1
ENSG00000075399	VPS9D1	protein_coding	Q9Y2B5	-0.327784	0.550965	0.36	0.666129	0	0	0	0
ENSG00000075407	ZNF37A	protein_coding	P17032	-0.807735	0.00731719	-0.264427	0.605225	0	1	0	1
ENSG00000075413	MARK3	protein_coding	P27448	-0.145277	0.412976	0.034153	0.91102	1	0	0	1
ENSG00000075415	SLC25A3	protein_coding	Q00325	-0.057808	0.828167	-0.224878	0.306298	1	0	1	0
ENSG00000075420	FNDC3B	protein_coding	Q53EP0	0.0474849	0.885387	0.0636427	0.871994	1	1	0	1
ENSG00000075426	FOSL2	protein_coding	P15408	-0.167157	0.693892	-0.0454777	0.947427	0	0	0	0
ENSG00000075429	CACNG5	protein_coding	Q9UF02	0.701887	NA	0.358832	NA	1	0	0	1
ENSG00000075461	CACNG4	protein_coding	Q9UBN1	0.923646	NA	1.65506	NA	1	0	0	1
ENSG00000075539	FRYL	protein_coding	O94915	-0.509046	0.00311051	0.304239	0.21308	0	0	0	0
ENSG00000075568	TMEM131	protein_coding	Q92545	-0.326481	0.104552	0.507578	0.0202212	1	1	0	1
ENSG00000075618	FSCN1	protein_coding	Q16658	0.133364	0.544989	-0.00536536	0.987248	0	1	0	1
ENSG00000075624	ACTB	protein_coding	P60709	0.855507	6.82731e-14	-0.133352	0.621857	1	0	0	1
ENSG00000075643	MOCOS	protein_coding	Q96EN8	-0.301335	0.225554	0.188489	0.618105	0	0	0	0
ENSG00000075651	PLD1	protein_coding	Q13393	-0.191238	0.511545	0.0822495	0.852623	1	1	0	1
ENSG00000075673	ATP12A	protein_coding	P54707	0.413426	0.736733	0.00515918	NA	1	0	0	1
ENSG00000075702	WDR62	protein_coding	O43379	-0.21923	0.330522	0.248649	0.362165	0	0	0	0
ENSG00000075711	DLG1	protein_coding	Q12959	-0.298246	0.0399333	0.131643	0.59427	1	1	0	1
ENSG00000075785	RAB7A	protein_coding	P51149	-0.0638118	0.762137	-0.462846	0.00341408	1	1	0	1
ENSG00000075790	BCAP29	protein_coding	Q9UHQ4	-0.256526	0.224595	-0.0401076	0.913462	1	1	0	1
ENSG00000075826	SEC31B	protein_coding	Q9NQW1	-1.01923	0.0008416	-0.40719	0.425716	1	1	0	1
ENSG00000075856	SART3	protein_coding	Q15020	0.22098	0.0955447	0.217568	0.200774	0	0	0	0
ENSG00000075884	ARHGAP15	protein_coding	Q53QZ3	NA	NA	NA	NA	1	1	0	1
ENSG00000075886	TUBA3D	protein_coding	P0DPH8	0.498566	NA	1.45774	NA	0	0	0	0
ENSG00000075891	PAX2	protein_coding	Q02962	-0.0483902	0.957444	0.0901147	0.934709	1	1	0	1
ENSG00000075914	EXOSC7	protein_coding	Q15024	0.497899	0.000369662	0.104287	0.666647	0	0	0	0
ENSG00000075945	KIFAP3	protein_coding	Q92845	-0.248213	0.0843867	0.763304	8.50621e-06	1	0	0	1
ENSG00000075975	MKRN2	protein_coding	Q9H000	0.00636454	0.982966	-0.256514	0.199268	0	0	0	0
ENSG00000076003	MCM6	protein_coding	Q14566	-0.0785225	0.661702	0.390328	0.0217926	0	0	0	0
ENSG00000076043	REXO2	protein_coding	Q9Y3B8	0.219974	0.25441	-0.176136	0.480215	0	0	1	0
ENSG00000076053	RBM7	protein_coding	Q9Y580	0.125071	0.74088	-0.27136	0.500406	0	0	0	0
ENSG00000076067	RBMS2	protein_coding	Q15434	-0.804698	0.00650071	-0.578475	0.133698	0	0	0	0
ENSG00000076108	BAZ2A	protein_coding	Q9UIF9	0.120443	0.563347	0.279378	0.126704	0	0	0	0
ENSG00000076201	PTPN23	protein_coding	Q9H3S7	0.0135538	0.961809	0.373728	0.0501328	1	0	0	1
ENSG00000076242	MLH1	protein_coding	P40692	-0.452367	NA	-1.39896	NA	1	0	1	0
ENSG00000076248	UNG	protein_coding	P13051	0.0726878	0.703593	-0.184149	0.423521	0	0	1	0
ENSG00000076258	FMO4	protein_coding	P31512	0.34268	0.482081	0.645352	0.16865	1	0	0	1
ENSG00000076321	KLHL20	protein_coding	Q9Y2M5	-0.425153	0.0418084	-0.400487	0.0949764	1	1	0	1
ENSG00000076344	RGS11	protein_coding	O94810	0.158763	NA	0.298429	NA	0	0	0	0
ENSG00000076351	SLC46A1	protein_coding	Q96NT5	-0.110484	0.800794	0.290381	0.521762	1	1	0	1
ENSG00000076356	PLXNA2	protein_coding	O75051	0.368617	0.0993366	0.459168	0.0536001	1	0	0	1
ENSG00000076382	SPAG5	protein_coding	Q96R06	-0.0971221	0.59385	0.16832	0.444865	0	0	0	0
ENSG00000076513	ANKRD13A	protein_coding	Q8IZ07	-0.13082	0.588309	-0.300631	0.145551	1	1	0	1
ENSG00000076554	TPD52	protein_coding	P55327	0.051557	0.907268	0.342355	0.348916	1	1	0	1
ENSG00000076555	ACACB	protein_coding	O00763	-0.36655	0.128708	-0.179934	0.610856	0	1	1	1
ENSG00000076604	TRAF4	protein_coding	Q9BUZ4	0.587824	0.0102295	0.0674955	0.857269	1	0	0	1
ENSG00000076641	PAG1	protein_coding	Q9NWQ8	0.146525	0.603333	0.363376	0.150423	1	1	0	1
ENSG00000076650	GPATCH1	protein_coding	Q9BRR8	-0.0894981	0.771604	0.123603	0.734227	0	1	0	1
ENSG00000076662	ICAM3	protein_coding	P32942	-2.69712	NA	-2.1413	NA	1	0	0	1
ENSG00000076685	NT5C2	protein_coding	P49902	-0.601275	1.38177e-05	0.195794	0.379153	0	0	0	0
ENSG00000076706	MCAM	protein_coding	P43121	0.577135	0.00182576	0.498263	0.021624	1	1	0	1
ENSG00000076716	GPC4	protein_coding	O75487	0.899945	1.23275e-10	0.941317	1.52381e-08	1	1	0	1
ENSG00000076770	MBNL3	protein_coding	Q9NUK0	-0.539798	0.0530332	-0.0340843	0.951087	0	1	0	1
ENSG00000076826	CAMSAP3	protein_coding	Q9P1Y5	0.220632	0.353746	0.28158	0.295859	0	0	0	0
ENSG00000076864	RAP1GAP	protein_coding	P47736	-0.00712868	0.988971	0.125098	0.812169	1	0	0	1
ENSG00000076924	XAB2	protein_coding	Q9HCS7	0.407138	0.00437136	0.606354	0.000101968	1	1	0	1
ENSG00000076928	ARHGEF1	protein_coding	Q92888	0.530258	0.00271557	0.500822	0.0149722	1	1	0	1
ENSG00000076944	STXBP2	protein_coding	Q15833	0.129107	0.749438	0.0485601	0.926669	1	0	0	1
ENSG00000076984	MAP2K7	protein_coding	O14733	-0.208539	0.181182	0.174943	0.481332	0	1	0	1
ENSG00000077009	NMRK2	protein_coding	Q9NPI5	-0.375652	0.779717	0.38607	NA	1	1	0	1
ENSG00000077044	DGKD	protein_coding	Q16760	-0.260331	0.184286	-0.0161623	0.966763	1	0	0	1
ENSG00000077063	CTTNBP2	protein_coding	Q8WZ74	0.350898	0.139929	-0.238076	0.478716	0	0	0	0
ENSG00000077080	ACTL6B	protein_coding	O94805	0.0736044	0.968524	1.5164	NA	0	0	0	0
ENSG00000077092	RARB	protein_coding	P10826	0.194776	0.416189	0.283573	0.253794	0	0	0	0
ENSG00000077097	TOP2B	protein_coding	Q02880	-0.323245	0.016325	0.361242	0.00881413	0	0	0	0
ENSG00000077147	TM9SF3	protein_coding	Q9HD45	0.422983	0.000524775	0.482798	0.00117992	1	1	0	1
ENSG00000077150	NFKB2	protein_coding	Q00653	0.320792	0.281505	0.606345	0.0368575	0	0	0	0
ENSG00000077152	UBE2T	protein_coding	Q9NPD8	0.0306129	0.892528	0.00173785	0.994816	0	0	0	0
ENSG00000077157	PPP1R12B	protein_coding	O60237	-0.131336	0.682337	-0.0695795	0.884133	0	1	0	1
ENSG00000077232	DNAJC10	protein_coding	Q8IXB1	0.013954	0.953721	0.496284	0.000284806	1	0	0	1
ENSG00000077235	GTF3C1	protein_coding	Q12789	0.0571773	0.747474	0.897183	4.94729e-08	1	0	0	1
ENSG00000077238	IL4R	protein_coding	P24394	0.679569	0.0340708	0.207542	0.667552	1	1	0	1
ENSG00000077254	USP33	protein_coding	Q8TEY7	-0.222792	0.113887	0.447584	0.000485912	1	1	0	1
ENSG00000077264	PAK3	protein_coding	O75914	-0.328779	0.640955	0.12981	NA	1	0	0	1
ENSG00000077274	CAPN6	protein_coding	Q9Y6Q1	0.0315215	NA	0.382123	NA	0	0	0	0
ENSG00000077279	DCX	protein_coding	O43602	2.87418	NA	-0.0104395	NA	0	0	0	0
ENSG00000077312	SNRPA	protein_coding	P09012	0.434997	0.0203056	-0.144399	0.648374	0	0	0	0
ENSG00000077327	SPAG6	protein_coding	O75602	-0.355131	0.822857	-0.777583	NA	0	0	0	0
ENSG00000077348	EXOSC5	protein_coding	Q9NQT4	0.704786	5.17969e-07	-0.169504	0.4286	0	0	0	0
ENSG00000077380	DYNC1I2	protein_coding	Q13409	-0.525867	0.0119746	0.331122	0.219597	1	1	0	1
ENSG00000077420	APBB1IP	protein_coding	Q7Z5R6	3.09007	NA	3.12341	NA	1	1	0	1
ENSG00000077454	LRCH4	protein_coding	O75427	0.233233	0.460495	0.192477	0.599142	0	0	0	0
ENSG00000077458	FAM76B	protein_coding	Q5HYJ3	-0.312855	0.196267	-0.372667	0.13895	0	0	0	0
ENSG00000077463	SIRT6	protein_coding	Q8N6T7	0.384845	0.0478963	-0.00101993	0.998055	0	0	0	0
ENSG00000077498	TYR	protein_coding	P14679	NA	NA	NA	NA	1	1	0	1
ENSG00000077514	POLD3	protein_coding	Q15054	-0.831376	3.51919e-10	-0.125768	0.628248	0	0	0	0
ENSG00000077522	ACTN2	protein_coding	P35609	-0.353901	0.239662	-0.409713	0.201075	1	0	0	1
ENSG00000077549	CAPZB	protein_coding	P47756	0.134147	0.446715	0.0476974	0.85986	0	1	0	1
ENSG00000077585	GPR137B	protein_coding	O60478	0.203928	0.705872	0.487038	0.357467	1	0	0	1
ENSG00000077616	NAALAD2	protein_coding	Q9Y3Q0	-0.137428	0.877093	0.441156	0.616469	1	0	0	1
ENSG00000077684	JADE1	protein_coding	Q6IE81	0.117232	0.579907	0.114815	0.643205	1	0	0	1
ENSG00000077713	SLC25A43	protein_coding	Q8WUT9	0.214795	0.779102	-0.109932	0.910281	1	0	1	0
ENSG00000077721	UBE2A	protein_coding	P49459	0.209921	0.141535	-0.67526	1.66382e-06	0	1	0	1
ENSG00000077782	FGFR1	protein_coding	P11362	0.269078	0.105771	0.0270602	0.930172	1	1	0	1
ENSG00000077800	FKBP6	protein_coding	O75344	1.11731	NA	1.16319	NA	0	0	0	0
ENSG00000077935	SMC1B	protein_coding	Q8NDV3	-0.506528	0.710443	0.406144	NA	0	0	0	0
ENSG00000077942	FBLN1	protein_coding	P23142	1.39163	2.42318e-18	0.483854	0.0078486	1	1	0	1
ENSG00000077943	ITGA8	protein_coding	P53708	0.467625	0.0787128	0.461593	0.0982479	1	0	0	1
ENSG00000077984	CST7	protein_coding	O76096	1.12874	NA	-0.43026	NA	1	1	0	1
ENSG00000078018	MAP2	protein_coding	P11137	0.54794	0.549516	0.324738	NA	0	0	0	0
ENSG00000078043	PIAS2	protein_coding	O75928	-0.191999	0.382204	-0.198764	0.429972	0	0	0	0
ENSG00000078053	AMPH	protein_coding	P49418	-0.0846377	0.827792	0.419064	0.188264	1	1	0	1
ENSG00000078061	ARAF	protein_coding	P10398	-0.0201836	0.953867	-0.0289742	0.940818	0	0	0	0
ENSG00000078070	MCCC1	protein_coding	Q96RQ3	-0.662579	0.000846067	-0.0850487	0.817208	0	1	1	1
ENSG00000078081	LAMP3	protein_coding	Q9UQV4	-0.0810963	0.908016	0.0791593	0.928653	1	1	0	1
ENSG00000078098	FAP	protein_coding	Q12884	NA	NA	NA	NA	1	1	0	1
ENSG00000078114	NEBL	protein_coding	O76041	0.00394044	0.993172	0.277487	0.49662	0	0	0	0
ENSG00000078124	ACER3	protein_coding	Q9NUN7	-0.149695	0.752219	0.0987783	0.864767	1	0	0	1
ENSG00000078140	UBE2K	protein_coding	P61086	0.408463	0.00658822	0.114898	0.690987	0	0	0	0
ENSG00000078142	PIK3C3	protein_coding	Q8NEB9	-0.353689	0.347215	0.223676	0.633128	1	0	0	1
ENSG00000078177	N4BP2	protein_coding	Q86UW6	-0.402714	0.019028	0.26463	0.274263	0	1	0	1
ENSG00000078237	TIGAR	protein_coding	Q9NQ88	-0.144109	0.350536	-0.350128	0.0459154	0	0	0	0
ENSG00000078246	TULP3	protein_coding	O75386	-0.191644	0.262768	-0.403323	0.041974	1	1	0	1
ENSG00000078269	SYNJ2	protein_coding	O15056	0.0241946	0.951047	0.0848022	0.806815	0	0	0	0
ENSG00000078295	ADCY2	protein_coding	Q08462	NA	NA	NA	NA	1	0	0	1
ENSG00000078304	PPP2R5C	protein_coding	Q13362	0.143133	0.49178	-0.107065	0.699289	1	1	0	1
ENSG00000078319	PMS2P1	unprocessed_pseudogene	A4D2B8	-0.590618	0.200145	-0.275711	0.698508	0	0	0	0
ENSG00000078328	RBFOX1	protein_coding	Q9NWB1	-0.834916	NA	NA	NA	0	1	0	1
ENSG00000078369	GNB1	protein_coding	P62873	-0.290747	0.0677199	-0.178916	0.419205	1	1	0	1
ENSG00000078399	HOXA9	protein_coding	P31269	0.141263	0.537189	-0.482513	0.00590164	0	0	0	0
ENSG00000078401	EDN1	protein_coding	P05305	0.567234	NA	0.382461	NA	1	1	0	1
ENSG00000078403	MLLT10	protein_coding	P55197	-0.497689	0.00143325	-0.0575139	0.883349	0	0	0	0
ENSG00000078487	ZCWPW1	protein_coding	Q9H0M4	0.3247	0.517452	0.21138	0.740189	0	1	0	1
ENSG00000078549	ADCYAP1R1	protein_coding	P41586	0.79344	0.011615	0.735904	0.0569288	1	1	0	1
ENSG00000078579	FGF20	protein_coding	Q9NP95	3.3099	NA	-0.457433	NA	1	0	0	1
ENSG00000078589	P2RY10	protein_coding	O00398	NA	NA	NA	NA	1	0	0	1
ENSG00000078596	ITM2A	protein_coding	O43736	1.33147	0.164608	1.48601	NA	1	0	0	1
ENSG00000078618	NRDC	protein_coding	O43847	-0.322998	0.0737424	0.356798	0.0544202	0	0	1	0
ENSG00000078668	VDAC3	protein_coding	Q9Y277	-0.568711	0.00156547	-0.0695291	0.829046	0	0	1	0
ENSG00000078674	PCM1	protein_coding	Q15154	-0.182893	0.512124	0.459197	0.0580995	1	0	0	1
ENSG00000078687	TNRC6C	protein_coding	Q9HCJ0	0.104911	0.729636	0.0932391	0.799441	0	0	0	0
ENSG00000078699	CBFA2T2	protein_coding	O43439	-0.0128863	0.972016	-0.282725	0.323447	0	0	0	0
ENSG00000078725	BRINP1	protein_coding	O60477	NA	NA	NA	NA	1	1	0	1
ENSG00000078747	ITCH.1	protein_coding	#N/A	-0.778336	0.000782659	-0.0568005	0.917468	0	0	0	0
ENSG00000078795	PKD2L2	protein_coding	Q9NZM6	0.0114266	0.995248	0.00568392	NA	1	1	0	1
ENSG00000078804	TP53INP2	protein_coding	Q8IXH6	-0.643965	0.0257209	-0.117018	0.840156	1	0	0	1
ENSG00000078808	SDF4	protein_coding	Q9BRK5	1.00391	5.80935e-15	0.191432	0.348809	1	1	0	1
ENSG00000078814	MYH7B	protein_coding	A7E2Y1	0.287665	0.833163	-0.0310981	NA	1	0	0	1
ENSG00000078898	BPIFB2	protein_coding	Q8N4F0	NA	NA	NA	NA	1	1	0	1
ENSG00000078900	TP73	protein_coding	O15350	0.152331	0.664832	0.152458	0.726502	1	1	0	1
ENSG00000078902	TOLLIP	protein_coding	Q9H0E2	0.582329	0.0225539	-0.342186	0.197164	1	1	0	1
ENSG00000078967	UBE2D4	protein_coding	Q9Y2X8	-0.048774	0.950765	-0.0828908	0.928946	0	1	0	1
ENSG00000079101	CLUL1	protein_coding	Q15846	0.336235	0.801381	-0.409517	NA	1	1	0	1
ENSG00000079102	RUNX1T1	protein_coding	Q06455	-0.0791596	0.828624	-0.144965	0.709437	0	0	0	0
ENSG00000079112	CDH17	protein_coding	Q12864	-0.783402	NA	0.136456	NA	1	1	0	1
ENSG00000079134	THOC1	protein_coding	Q96FV9	0.150053	0.567451	0.419639	0.0800901	0	0	0	0
ENSG00000079150	FKBP7	protein_coding	Q9Y680	0.336105	0.187224	-0.0544704	0.911635	1	1	0	1
ENSG00000079156	OSBPL6	protein_coding	Q9BZF3	-0.465717	0.00708439	0.281311	0.326416	1	1	0	1
ENSG00000079215	SLC1A3	protein_coding	P43003	0.178532	0.340817	0.680691	0.000213436	1	0	0	1
ENSG00000079246	XRCC5	protein_coding	P13010	0.0108439	0.97037	0.172128	0.517449	1	0	0	1
ENSG00000079257	LXN	protein_coding	Q9BS40	0.10404	0.875468	0.139371	0.858973	0	0	0	0
ENSG00000079263	SP140	protein_coding	Q13342	NA	NA	NA	NA	0	0	0	0
ENSG00000079277	MKNK1	protein_coding	Q9BUB5	0.0685586	0.80015	0.104265	0.730208	0	0	0	0
ENSG00000079308	TNS1	protein_coding	Q9HBL0	0.911398	0.210042	0.617793	NA	0	0	0	0
ENSG00000079313	REXO1	protein_coding	Q8N1G1	0.090503	0.734519	0.138107	0.642138	0	0	0	0
ENSG00000079332	SAR1A	protein_coding	Q9NR31	0.344638	0.00747956	-0.111717	0.590848	1	1	0	1
ENSG00000079335	CDC14A	protein_coding	Q9UNH5	0.067907	0.896243	0.376758	0.38426	0	0	0	0
ENSG00000079337	RAPGEF3	protein_coding	O95398	0.551258	0.599609	0.491448	NA	1	0	0	1
ENSG00000079385	CEACAM1	protein_coding	P13688	-0.816358	NA	0.554616	NA	1	0	0	1
ENSG00000079387	SENP1	protein_coding	Q9P0U3	-0.127348	0.602671	-0.170476	0.549376	0	0	0	0
ENSG00000079393	DUSP13	protein_coding	Q9UII6	0.111193	NA	-3.10031	NA	0	0	0	0
ENSG00000079432	CIC	protein_coding	Q96RK0	-0.287255	0.13561	0.1367	0.652197	0	1	0	1
ENSG00000079435	LIPE	protein_coding	Q05469	-0.191763	0.637966	-0.144615	0.785279	0	0	0	0
ENSG00000079459	FDFT1	protein_coding	P37268	0.474717	0.0120775	0.236393	0.388739	1	1	0	1
ENSG00000079462	PAFAH1B3	protein_coding	Q15102	0.66689	9.61101e-05	-0.0156333	0.966831	1	0	0	1
ENSG00000079482	OPHN1	protein_coding	O60890	-0.0840408	0.846492	0.0997551	0.816948	0	1	0	1
ENSG00000079557	AFM	protein_coding	P43652	NA	NA	NA	NA	1	1	0	1
ENSG00000079616	KIF22	protein_coding	Q14807	0.196803	0.296024	0.261726	0.207674	0	0	0	0
ENSG00000079689	SCGN	protein_coding	O76038	-0.688962	NA	-0.584984	NA	1	0	0	1
ENSG00000079691	CARMIL1	protein_coding	Q5VZK9	-0.419359	0.0550998	0.441962	0.140462	1	0	0	1
ENSG00000079739	PGM1	protein_coding	P36871	0.264751	0.134631	0.330088	0.123484	1	0	0	1
ENSG00000079785	DDX1	protein_coding	Q92499	-0.396439	0.00643187	0.749064	2.52446e-07	1	0	0	1
ENSG00000079805	DNM2	protein_coding	P50570	0.0591724	0.744019	0.0499859	0.837375	1	1	0	1
ENSG00000079819	EPB41L2	protein_coding	O43491	-0.0296422	0.884117	0.145769	0.511171	1	1	0	1
ENSG00000079841	RIMS1	protein_coding	Q86UR5	-0.390821	0.790448	0.243044	NA	1	1	0	1
ENSG00000079931	MOXD1	protein_coding	Q6UVY6	0.0942829	0.790456	0.290457	0.343631	1	1	0	1
ENSG00000079950	STX7	protein_coding	O15400	-0.668539	8.32228e-05	-0.170178	0.593856	1	1	0	1
ENSG00000079974	RABL2B	protein_coding	Q9UNT1	0.0232853	0.966517	0.124744	0.790373	0	1	0	1
ENSG00000079999	KEAP1	protein_coding	Q14145	-0.135443	0.440378	0.182303	0.431232	1	0	0	1
ENSG00000080007	DDX43	protein_coding	Q9NXZ2	-1.41401	NA	-1.82637	NA	0	0	0	0
ENSG00000080031	PTPRH	protein_coding	Q9HD43	-0.10107	0.955242	0.358044	NA	1	0	0	1
ENSG00000080166	DCT	protein_coding	P40126	-4.5503	NA	-5.3007	NA	1	0	0	1
ENSG00000080189	SLC35C2	protein_coding	Q9NQQ7	0.198798	0.365796	-0.0681568	0.841574	1	1	0	1
ENSG00000080200	CRYBG3	protein_coding	Q68DQ2	-0.560638	0.00031055	0.0969757	0.764614	0	0	0	0
ENSG00000080224	EPHA6	protein_coding	Q9UF33	0.181316	0.657132	0.438347	0.290113	1	0	0	1
ENSG00000080293	SCTR	protein_coding	P47872	2.46113	NA	2.49557	NA	1	0	0	1
ENSG00000080298	RFX3	protein_coding	P48380	0.321314	0.291302	-0.109186	0.801347	0	1	0	1
ENSG00000080345	RIF1	protein_coding	Q5UIP0	-0.0517673	0.768788	0.427864	0.000787571	1	1	0	1
ENSG00000080371	RAB21	protein_coding	Q9UL25	-0.548378	2.70465e-05	-0.21968	0.260992	1	0	0	1
ENSG00000080493	SLC4A4	protein_coding	Q9Y6R1	0.336926	0.358574	0.321585	0.474154	1	0	0	1
ENSG00000080503	SMARCA2	protein_coding	P51531	-0.113343	0.565408	0.141749	0.553575	0	1	0	1
ENSG00000080511	RDH8	protein_coding	Q9NYR8	1.11731	NA	1.16319	NA	1	1	0	1
ENSG00000080546	SESN1	protein_coding	Q9Y6P5	-0.606645	0.00250739	-0.259148	0.427478	0	0	0	0
ENSG00000080561	MID2	protein_coding	Q9UJV3	0.081895	0.785048	0.132154	0.709437	0	0	0	0
ENSG00000080572	PIH1D3	protein_coding	Q9NQM4	0.0700301	NA	0.840343	NA	0	0	0	0
ENSG00000080573	COL5A3	protein_coding	P25940	0.49694	NA	1.51128	NA	1	1	0	1
ENSG00000080603	SRCAP	protein_coding	Q6ZRS2	0.101686	0.744666	0.0457539	0.913724	1	0	0	1
ENSG00000080608	PUM3	protein_coding	Q15397	-0.273396	0.127624	0.380308	0.0573684	1	0	0	1
ENSG00000080618	CPB2	protein_coding	Q96IY4	0.154393	NA	-1.05809	NA	1	1	0	1
ENSG00000080644	CHRNA3	protein_coding	P32297	0.616405	0.0117372	0.22264	0.521762	1	0	0	1
ENSG00000080709	KCNN2	protein_coding	Q9H2S1	0.221464	0.886301	0.525485	NA	1	0	0	1
ENSG00000080802	CNOT4	protein_coding	O95628	0.155505	0.404527	0.0611042	0.824815	0	0	0	0
ENSG00000080815	PSEN1	protein_coding	P49768	0.334806	0.0483493	0.113888	0.680338	1	1	0	1
ENSG00000080819	CPOX	protein_coding	P36551	0.279228	0.0284215	0.362265	0.0124879	0	0	1	0
ENSG00000080822	CLDND1	protein_coding	Q9NY35	0.118073	0.670222	0.154009	0.628248	1	1	0	1
ENSG00000080823	MOK	protein_coding	Q9UQ07	-0.161964	0.579942	0.0449379	0.935245	0	1	0	1
ENSG00000080824	HSP90AA1	protein_coding	P07900	0.287474	0.228536	0.00469246	0.991381	1	0	0	1
ENSG00000080839	RBL1	protein_coding	P28749	-0.445585	0.00718014	0.0543833	0.869065	0	0	0	0
ENSG00000080845	DLGAP4	protein_coding	Q9Y2H0	-0.163758	0.490065	0.215284	0.437977	1	0	0	1
ENSG00000080854	IGSF9B	protein_coding	Q9UPX0	-0.361379	0.349739	-0.16633	0.744797	1	0	0	1
ENSG00000080910	CFHR2	protein_coding	P36980	NA	NA	NA	NA	1	1	0	1
ENSG00000080947	CROCCP3	transcribed_unprocessed_pseudogene	Q8IVE0	-0.181656	0.77128	-0.417346	0.489665	0	0	0	0
ENSG00000080986	NDC80	protein_coding	O14777	0.0870106	0.703296	0.463078	0.0147513	1	0	0	1
ENSG00000081014	AP4E1	protein_coding	Q9UPM8	-0.844238	6.08556e-07	-0.0696433	0.865514	0	0	0	0
ENSG00000081019	RSBN1	protein_coding	Q5VWQ0	0.203774	0.210713	0.0739362	0.777875	0	1	0	1
ENSG00000081026	MAGI3	protein_coding	Q5TCQ9	0.226971	0.153456	-0.145012	0.53268	1	1	0	1
ENSG00000081041	CXCL2	protein_coding	P19875	0.192716	NA	0.527355	NA	1	1	0	1
ENSG00000081051	AFP	protein_coding	P02771	-1.59642	NA	NA	NA	1	1	0	1
ENSG00000081052	COL4A4	protein_coding	P53420	0.459043	0.392006	0.470573	0.436338	1	1	0	1
ENSG00000081059	TCF7	protein_coding	P36402	-0.0520936	0.939334	0.054205	0.94697	0	0	0	0
ENSG00000081087	OSTM1	protein_coding	Q86WC4	0.142369	0.559221	0.277593	0.345194	1	1	0	1
ENSG00000081138	CDH7	protein_coding	Q9ULB5	-0.904651	NA	-1.05047	NA	1	0	0	1
ENSG00000081148	IMPG2	protein_coding	Q9BZV3	-1.6901	NA	-1.34682	NA	1	0	0	1
ENSG00000081154	PCNP	protein_coding	Q8WW12	0.0800503	0.714086	0.00273502	0.992676	0	0	0	0
ENSG00000081177	EXD2	protein_coding	Q9NVH0	0.00672155	0.986545	0.261734	0.350556	0	0	0	0
ENSG00000081181	ARG2	protein_coding	P78540	0.0588479	0.861313	-0.400568	0.100197	0	0	1	0
ENSG00000081189	MEF2C	protein_coding	Q06413	-0.0120523	0.97071	0.0990438	0.762051	0	1	0	1
ENSG00000081237	PTPRC	protein_coding	P08575	NA	NA	NA	NA	1	1	0	1
ENSG00000081248	CACNA1S	protein_coding	Q13698	1.60365	NA	3.08469	NA	1	0	0	1
ENSG00000081277	PKP1	protein_coding	Q13835	NA	NA	NA	NA	1	0	0	1
ENSG00000081307	UBA5	protein_coding	Q9GZZ9	-0.178956	0.308535	0.226262	0.222557	1	1	0	1
ENSG00000081320	STK17B	protein_coding	O94768	-0.160083	0.579537	-0.150186	0.663498	1	1	0	1
ENSG00000081377	CDC14B	protein_coding	O60729	-0.0832255	0.874097	-0.316036	0.474523	0	0	0	0
ENSG00000081386	ZNF510	protein_coding	Q9Y2H8	-0.949228	0.0122545	-0.587914	0.253794	0	1	0	1
ENSG00000081479	LRP2	protein_coding	P98164	0.267812	0.0411054	0.988356	1.82984e-15	1	1	0	1
ENSG00000081665	ZNF506	protein_coding	Q5JVG8	-0.541868	0.586515	-0.463445	NA	0	0	0	0
ENSG00000081692	JMJD4	protein_coding	Q9H9V9	0.316421	0.16083	0.318078	0.24929	0	1	0	1
ENSG00000081721	DUSP12	protein_coding	Q9UNI6	-0.218166	0.367536	-0.0600509	0.880019	0	0	0	0
ENSG00000081760	AACS	protein_coding	Q86V21	0.259879	0.160247	0.158981	0.580015	0	1	0	1
ENSG00000081791	KIAA0141	protein_coding	#N/A	0.270535	0.321431	-0.0534458	0.906457	0	1	1	1
ENSG00000081800	SLC13A1	protein_coding	Q9BZW2	NA	NA	NA	NA	1	0	0	1
ENSG00000081803	CADPS2	protein_coding	Q86UW7	-0.418578	0.0201973	0.126853	0.709863	0	1	0	1
ENSG00000081818	PCDHB4	protein_coding	Q9Y5E5	NA	NA	NA	NA	1	1	0	1
ENSG00000081842	PCDHA6	protein_coding	Q9UN73	1.07291	NA	1.11854	NA	1	1	0	1
ENSG00000081853	PCDHGA2	protein_coding	Q9Y5H1	-1.81375	NA	-1.25169	NA	1	1	0	1
ENSG00000081870	HSPB11	protein_coding	Q9Y547	-0.393614	0.00828729	-0.266328	0.117624	0	0	0	0
ENSG00000081913	PHLPP1	protein_coding	O60346	-0.111513	0.65427	0.116429	0.709822	0	0	0	0
ENSG00000081923	ATP8B1	protein_coding	O43520	-0.833552	0.289242	-0.261457	NA	1	0	0	1
ENSG00000081985	IL12RB2	protein_coding	Q99665	-0.872393	0.138533	-0.734131	0.309173	1	1	0	1
ENSG00000082014	SMARCD3	protein_coding	Q6STE5	0.194733	0.473807	-0.046033	0.918427	0	0	0	0
ENSG00000082068	WDR70	protein_coding	Q9NW82	-0.189541	0.263902	-0.12431	0.564726	0	0	0	0
ENSG00000082074	FYB	protein_coding	#N/A	1.11731	NA	1.16319	NA	0	0	0	0
ENSG00000082126	MPP4	protein_coding	Q96JB8	-0.887916	NA	0.176089	NA	0	0	0	0
ENSG00000082146	STRADB	protein_coding	Q9C0K7	-0.288269	0.432466	-0.199116	0.676254	0	0	0	0
ENSG00000082153	BZW1	protein_coding	Q7L1Q6	-0.0254898	0.927463	-0.119138	0.625549	1	1	0	1
ENSG00000082175	PGR	protein_coding	P06401	-0.617384	NA	0.212824	NA	0	0	0	0
ENSG00000082196	C1QTNF3	protein_coding	Q9BXJ4	2.01839	NA	2.0482	NA	1	1	0	1
ENSG00000082212	ME2	protein_coding	P23368	-0.333458	0.034256	0.225465	0.34319	0	0	1	0
ENSG00000082213	C5orf22	protein_coding	Q49AR2	-0.406809	0.0139535	0.0202729	0.959849	0	0	0	0
ENSG00000082258	CCNT2	protein_coding	O60583	-0.461586	0.0324111	-0.213313	0.470593	1	1	0	1
ENSG00000082269	FAM135A	protein_coding	Q9P2D6	-0.412217	0.0272536	0.0756609	0.834857	0	0	0	0
ENSG00000082293	COL19A1	protein_coding	Q14993	0.19432	0.839324	0.437327	NA	1	1	0	1
ENSG00000082397	EPB41L3	protein_coding	Q9Y2J2	-0.0880508	0.715193	0.240352	0.319649	1	1	0	1
ENSG00000082438	COBLL1	protein_coding	Q53SF7	-0.185926	0.461696	0.076676	0.838687	0	1	0	1
ENSG00000082458	DLG3	protein_coding	Q92796	0.206343	0.335434	0.0293869	0.946531	1	0	0	1
ENSG00000082482	KCNK2	protein_coding	O95069	1.11731	NA	1.16319	NA	1	0	0	1
ENSG00000082497	SERTAD4	protein_coding	Q9NUC0	NA	NA	-2.36149	NA	0	0	0	0
ENSG00000082512	TRAF5	protein_coding	O00463	-0.242586	0.609376	0.213049	0.7225	0	0	0	0
ENSG00000082515	MRPL22	protein_coding	Q9NWU5	0.146897	0.561853	-0.334876	0.190597	0	1	1	1
ENSG00000082516	GEMIN5	protein_coding	Q8TEQ6	-0.332167	0.00608293	0.40317	0.0131859	1	0	0	1
ENSG00000082556	OPRK1	protein_coding	P41145	1.86741	NA	0.941497	NA	1	1	0	1
ENSG00000082641	NFE2L1	protein_coding	Q14494	0.48581	0.00145927	0.327659	0.0828819	1	1	0	1
ENSG00000082684	SEMA5B	protein_coding	Q9P283	-0.247575	NA	-0.338831	NA	1	0	0	1
ENSG00000082701	GSK3B	protein_coding	P49841	-0.125392	0.537443	-0.116546	0.632664	1	0	0	1
ENSG00000082781	ITGB5	protein_coding	P18084	0.204735	0.480803	0.217334	0.507682	1	1	0	1
ENSG00000082805	ERC1	protein_coding	Q8IUD2	0.192501	0.436949	0.519728	0.0123962	1	1	0	1
ENSG00000082898	XPO1	protein_coding	O14980	-0.195151	0.184553	0.701148	3.73426e-08	1	1	0	1
ENSG00000082929	LINC01587	processed_transcript	Q99440	NA	NA	NA	NA	0	0	0	0
ENSG00000082996	RNF13	protein_coding	O43567	-0.308234	0.319268	-0.396687	0.189145	1	1	0	1
ENSG00000083067	TRPM3	protein_coding	Q9HCF6	0.679676	NA	-1.23996	NA	1	0	0	1
ENSG00000083093	PALB2	protein_coding	Q86YC2	-0.231202	0.247541	-0.15799	0.527114	0	0	0	0
ENSG00000083097	DOPEY1	protein_coding	Q5JWR5	-0.476014	0.00146596	0.0876628	0.788202	1	1	0	1
ENSG00000083099	LYRM2	protein_coding	Q9NU23	-0.488712	0.0213322	-0.270114	0.325519	0	0	1	0
ENSG00000083123	BCKDHB	protein_coding	P21953	-0.0871782	0.748111	0.0402976	0.917468	0	1	1	1
ENSG00000083168	KAT6A	protein_coding	Q92794	-0.0697977	0.742441	0.258688	0.243792	0	0	0	0
ENSG00000083223	ZCCHC6	protein_coding	#N/A	-0.544756	1.71181e-05	0.371497	0.0679308	0	0	0	0
ENSG00000083290	ULK2	protein_coding	Q8IYT8	-0.678134	0.0071806	-0.318567	0.437977	1	0	0	1
ENSG00000083307	GRHL2	protein_coding	Q6ISB3	NA	NA	NA	NA	1	0	0	1
ENSG00000083312	TNPO1	protein_coding	Q92973	-0.0569007	0.783371	0.381628	0.0149722	0	0	0	0
ENSG00000083444	PLOD1	protein_coding	Q02809	0.685139	8.24458e-06	0.549824	0.000138519	1	1	0	1
ENSG00000083454	P2RX5	protein_coding	Q93086	-0.999306	NA	1.17573	NA	1	0	0	1
ENSG00000083457	ITGAE	protein_coding	P38570	-0.168602	0.581417	-0.0780141	0.853032	1	0	0	1
ENSG00000083520	DIS3	protein_coding	Q9Y2L1	-0.00194661	0.993172	0.385531	0.021535	1	0	0	1
ENSG00000083535	PIBF1	protein_coding	Q8WXW3	-0.538982	9.80847e-05	-0.125638	0.593201	1	0	0	1
ENSG00000083544	TDRD3	protein_coding	Q9H7E2	-0.350581	0.0765186	0.182704	0.551744	1	1	0	1
ENSG00000083622	AC000111.6	antisense	#N/A	NA	NA	-3.08398	NA	0	0	0	0
ENSG00000083635	NUFIP1	protein_coding	Q9UHK0	-0.120235	0.690807	-0.186369	0.578281	0	0	0	0
ENSG00000083642	PDS5B	protein_coding	Q9NTI5	-0.206048	0.167253	0.408636	0.0218961	0	0	0	0
ENSG00000083720	OXCT1	protein_coding	P55809	-0.531951	0.00042436	0.0644057	0.814769	0	1	1	1
ENSG00000083750	RRAGB	protein_coding	Q5VZM2	-0.251556	0.362697	-0.0537837	0.918498	1	1	0	1
ENSG00000083782	EPYC	protein_coding	Q99645	1.11731	NA	1.16319	NA	1	1	0	1
ENSG00000083799	CYLD	protein_coding	Q9NQC7	-0.352007	0.0438319	-0.212329	0.355918	0	0	0	0
ENSG00000083807	SLC27A5	protein_coding	Q9Y2P5	-0.176067	0.707661	-0.129439	0.821534	1	0	0	1
ENSG00000083812	ZNF324	protein_coding	O75467	0.0315544	0.940019	-0.0599599	0.896048	0	0	0	0
ENSG00000083814	ZNF671	protein_coding	Q8TAW3	-0.214879	0.873149	-0.845167	NA	0	0	0	0
ENSG00000083817	ZNF416	protein_coding	Q9BWM5	0.00589275	0.992406	-0.48938	0.195406	0	0	0	0
ENSG00000083828	ZNF586	protein_coding	Q9NXT0	0.567057	0.00679384	-0.226774	0.426624	0	1	0	1
ENSG00000083838	ZNF446	protein_coding	Q9NWS9	0.359977	0.473745	0.281316	0.652371	1	0	0	1
ENSG00000083844	ZNF264	protein_coding	O43296	-0.144952	0.647645	-0.460149	0.0933377	0	0	0	0
ENSG00000083845	RPS5	protein_coding	P46782	0.320736	0.00154103	-0.159401	0.367174	1	1	0	1
ENSG00000083857	FAT1	protein_coding	Q14517	0.162672	0.304479	0.380522	0.0149882	1	1	0	1
ENSG00000083896	YTHDC1	protein_coding	Q96MU7	0.522364	0.309338	0.646581	0.179786	1	1	0	1
ENSG00000083937	CHMP2B	protein_coding	Q9UQN3	-0.330275	0.069453	-0.0609084	0.84212	1	0	0	1
ENSG00000084070	SMAP2	protein_coding	Q8WU79	-0.491646	0.00042436	-0.107053	0.705798	0	0	0	0
ENSG00000084072	PPIE	protein_coding	Q9UNP9	0.334512	0.0159602	-0.0918946	0.731916	1	0	0	1
ENSG00000084073	ZMPSTE24	protein_coding	O75844	0.0909482	0.647495	0.340246	0.0467111	1	1	0	1
ENSG00000084090	STARD7	protein_coding	Q9NQZ5	-0.18469	0.209278	-0.237113	0.15394	0	1	1	1
ENSG00000084092	NOA1	protein_coding	Q8NC60	0.0655393	0.75601	0.153889	0.512951	0	1	1	1
ENSG00000084093	REST	protein_coding	Q13127	-0.225908	0.153491	-0.143634	0.566797	0	0	0	0
ENSG00000084110	HAL	protein_coding	P42357	-1.08714	NA	-1.53873	NA	0	0	0	0
ENSG00000084112	SSH1	protein_coding	Q8WYL5	-0.657016	0.000753566	-0.241014	0.472546	1	1	0	1
ENSG00000084207	GSTP1	protein_coding	P09211	1.56427	0.0340734	0.396362	0.744749	1	0	0	1
ENSG00000084234	APLP2	protein_coding	Q06481	0.76277	5.32929e-06	0.339948	0.137992	1	1	0	1
ENSG00000084444	FAM234B	protein_coding	A2RU67	-0.0217342	0.949353	0.22119	0.358578	1	1	0	1
ENSG00000084453	SLCO1A2	protein_coding	P46721	-1.25343	NA	-2.47849	NA	1	1	0	1
ENSG00000084463	WBP11	protein_coding	Q9Y2W2	-0.0539818	0.810002	-0.226597	0.207945	0	0	0	0
ENSG00000084623	EIF3I	protein_coding	Q13347	0.333723	0.00301032	-0.257481	0.0922113	0	0	0	0
ENSG00000084628	NKAIN1	protein_coding	Q4KMZ8	-0.408143	0.438726	0.399261	0.613545	1	0	0	1
ENSG00000084636	COL16A1	protein_coding	Q07092	-1.24335	NA	0.311879	NA	1	1	0	1
ENSG00000084652	TXLNA	protein_coding	P40222	0.0749972	0.758632	0.0776999	0.800128	1	0	0	1
ENSG00000084674	APOB	protein_coding	P04114	NA	NA	NA	NA	1	1	0	1
ENSG00000084676	NCOA1	protein_coding	Q15788	-0.286459	0.135826	-0.288078	0.330038	1	1	0	1
ENSG00000084693	AGBL5	protein_coding	Q8NDL9	0.224248	0.24155	-0.107862	0.62621	0	0	0	0
ENSG00000084710	EFR3B	protein_coding	Q9Y2G0	-0.107184	0.764918	0.099667	0.836159	1	0	0	1
ENSG00000084731	KIF3C	protein_coding	O14782	-0.233066	0.41953	0.131913	0.750973	0	0	0	0
ENSG00000084733	RAB10	protein_coding	P61026	-0.203948	0.243674	-0.0594445	0.857529	1	0	0	1
ENSG00000084734	GCKR	protein_coding	Q14397	-2.1359	NA	-1.76906	NA	0	0	0	0
ENSG00000084754	HADHA	protein_coding	P40939	-0.518354	0.000144196	0.310686	0.137536	0	0	1	0
ENSG00000084764	MAPRE3	protein_coding	Q9UPY8	0.531199	0.0210114	0.340056	0.18034	0	0	0	0
ENSG00000084774	CAD	protein_coding	P27708	0.08544	0.614989	1.18583	6.88624e-10	1	0	0	1
ENSG00000085063	CD59	protein_coding	P13987	-0.111982	0.578233	-0.16282	0.487285	1	1	0	1
ENSG00000085117	CD82	protein_coding	P27701	0.591977	0.109497	0.0629752	0.921489	1	1	0	1
ENSG00000085185	BCORL1	protein_coding	Q5H9F3	0.151793	0.483847	-0.344921	0.106012	1	1	0	1
ENSG00000085224	ATRX	protein_coding	P46100	-0.435386	0.00891447	0.20758	0.321934	0	0	0	0
ENSG00000085231	AK6	protein_coding	Q9Y3D8	NA	NA	NA	NA	1	0	0	1
ENSG00000085265	FCN1	protein_coding	O00602	1.63339	NA	1.67896	NA	1	1	0	1
ENSG00000085274	MYNN	protein_coding	Q9NPC7	-0.121128	0.717328	-0.335898	0.234946	0	0	0	0
ENSG00000085276	MECOM	protein_coding	Q03112	-0.501674	0.00103783	0.217428	0.357977	0	0	0	0
ENSG00000085365	SCAMP1	protein_coding	O15126	0.0847161	0.830631	-0.0432856	0.930172	1	1	0	1
ENSG00000085377	PREP	protein_coding	P48147	0.0343214	0.876117	0.357211	0.0382817	1	0	0	1
ENSG00000085382	HACE1	protein_coding	Q8IYU2	-0.267698	0.129918	0.24509	0.242736	1	1	0	1
ENSG00000085415	SEH1L	protein_coding	Q96EE3	-0.0449761	0.818096	-0.00343177	0.990196	1	0	0	1
ENSG00000085433	WDR47	protein_coding	O94967	-0.210144	0.324183	-0.125578	0.657735	0	0	0	0
ENSG00000085449	WDFY1	protein_coding	Q8IWB7	0.0724618	0.729411	0.0978451	0.689606	0	0	0	0
ENSG00000085465	OVGP1	protein_coding	Q12889	-1.09733	0.000126618	-0.582488	0.157586	1	1	0	1
ENSG00000085491	SLC25A24	protein_coding	Q6NUK1	0.152112	0.308657	0.380809	0.0132516	1	0	1	0
ENSG00000085511	MAP3K4	protein_coding	Q9Y6R4	-0.563266	0.000356934	0.0944878	0.763667	0	0	0	0
ENSG00000085514	PILRA	protein_coding	Q9UKJ1	-0.435037	NA	-2.44372	NA	1	1	0	1
ENSG00000085552	IGSF9	protein_coding	Q9P2J2	0.351182	0.655143	0.0876624	0.938063	1	1	0	1
ENSG00000085563	ABCB1	protein_coding	P08183	0.357743	0.0649852	0.793009	5.92053e-05	1	0	0	1
ENSG00000085644	ZNF213	protein_coding	O14771	-0.181903	0.591935	0.0670023	0.896115	0	1	0	1
ENSG00000085662	AKR1B1	protein_coding	P15121	0.387659	0.000322616	-0.300237	0.0708984	1	0	0	1
ENSG00000085719	CPNE3	protein_coding	O75131	-0.191815	0.243105	0.483376	0.00203629	1	0	0	1
ENSG00000085721	RRN3	protein_coding	Q9NYV6	-0.898424	3.47142e-05	-0.126658	0.771051	0	0	0	0
ENSG00000085733	CTTN	protein_coding	Q14247	-0.0860345	0.58987	0.317925	0.0294425	1	1	0	1
ENSG00000085741	WNT11	protein_coding	O96014	0.133003	0.798855	0.136675	0.823884	1	1	0	1
ENSG00000085760	MTIF2	protein_coding	P46199	-0.473151	6.63079e-05	0.1817	0.347074	0	0	1	0
ENSG00000085788	DDHD2	protein_coding	O94830	-0.283636	0.11668	-0.154437	0.562561	1	0	0	1
ENSG00000085831	TTC39A	protein_coding	Q5SRH9	0.120276	0.818755	-0.0760928	0.908505	0	0	0	0
ENSG00000085832	EPS15	protein_coding	P42566	-0.184916	0.257935	-0.0194168	0.951151	1	1	0	1
ENSG00000085840	ORC1	protein_coding	Q13415	-0.0269234	0.92202	-0.00471107	0.990836	1	1	0	1
ENSG00000085871	MGST2	protein_coding	Q99735	1.40681	2.05706e-36	-0.298608	0.313133	1	1	0	1
ENSG00000085872	CHERP	protein_coding	Q8IWX8	0.413099	0.00105189	0.150043	0.458035	1	0	0	1
ENSG00000085978	ATG16L1	protein_coding	Q676U5	NA	NA	NA	NA	0	0	0	0
ENSG00000085982	USP40	protein_coding	Q9NVE5	-0.636785	0.000227741	-0.0346674	0.936535	0	1	0	1
ENSG00000085998	POMGNT1	protein_coding	Q8WZA1	-0.130108	0.661107	0.124891	0.726134	1	0	0	1
ENSG00000085999	RAD54L	protein_coding	Q92698	-0.50279	0.00103188	0.099946	0.741876	0	0	0	0
ENSG00000086015	MAST2	protein_coding	Q6P0Q8	-0.121332	0.678364	0.0496335	0.916418	1	0	0	1
ENSG00000086061	DNAJA1	protein_coding	P31689	0.153009	0.4878	-0.0513962	0.884068	1	0	0	1
ENSG00000086062	B4GALT1	protein_coding	P15291	0.259224	0.29214	0.0900069	0.804087	1	1	0	1
ENSG00000086065	CHMP5	protein_coding	Q9NZZ3	0.181924	0.352483	-0.248528	0.237625	1	0	0	1
ENSG00000086102	NFX1	protein_coding	Q12986	-0.345802	0.00525592	0.273938	0.138158	1	0	0	1
ENSG00000086159	AQP6	protein_coding	Q13520	0.122092	0.938067	0.701067	NA	1	0	0	1
ENSG00000086189	DIMT1	protein_coding	Q9UNQ2	-0.116853	0.609228	-0.0323893	0.918427	0	0	0	0
ENSG00000086200	IPO11	protein_coding	Q9UI26	-0.137898	0.619054	0.364268	0.12859	0	1	0	1
ENSG00000086205	FOLH1	protein_coding	Q04609	1.12758	0.380876	1.36274	NA	1	0	0	1
ENSG00000086232	EIF2AK1	protein_coding	Q9BQI3	-0.145759	0.393735	-0.0289153	0.922875	0	1	0	1
ENSG00000086288	NME8	protein_coding	Q8N427	NA	NA	NA	NA	0	0	0	0
ENSG00000086289	EPDR1	protein_coding	Q9UM22	0.533049	0.286033	0.0313255	0.969637	1	1	0	1
ENSG00000086300	SNX10	protein_coding	Q9Y5X0	0.579382	0.0021234	-0.186065	0.507531	1	0	0	1
ENSG00000086475	SEPHS1	protein_coding	P49903	0.750177	1.30573e-08	0.0935996	0.775258	1	0	0	1
ENSG00000086504	MRPL28	protein_coding	Q13084	0.456701	0.00406017	-0.0233871	0.94531	0	0	1	0
ENSG00000086506	HBQ1	protein_coding	P09105	0.609141	0.259135	0.475012	0.427051	0	1	0	1
ENSG00000086544	ITPKC	protein_coding	Q96DU7	0.110111	0.743993	0.273771	0.359302	0	0	0	0
ENSG00000086548	CEACAM6	protein_coding	P40199	NA	NA	NA	NA	1	0	0	1
ENSG00000086570	FAT2	protein_coding	Q9NYQ8	-0.483778	0.719942	0.262929	NA	1	0	0	1
ENSG00000086589	RBM22	protein_coding	Q9NW64	0.395072	0.00451336	-0.183652	0.336453	0	0	0	0
ENSG00000086598	TMED2	protein_coding	Q15363	-0.0606764	0.754614	0.0743181	0.798425	1	1	0	1
ENSG00000086619	ERO1B	protein_coding	Q86YB8	0.412892	0.0880903	0.31663	0.264188	1	1	0	1
ENSG00000086666	ZFAND6	protein_coding	Q6FIF0	-0.174714	0.512016	-0.572835	0.0109957	0	0	0	0
ENSG00000086696	HSD17B2	protein_coding	P37059	NA	NA	-1.77464	NA	1	1	0	1
ENSG00000086712	TXLNG	protein_coding	Q9NUQ3	0.143679	0.715491	0.309019	0.391909	0	0	0	0
ENSG00000086717	PPEF1	protein_coding	O14829	-1.21891	0.219437	-0.17061	NA	0	1	0	1
ENSG00000086730	LAT2	protein_coding	Q9GZY6	-0.799351	0.124564	-0.322927	NA	1	1	0	1
ENSG00000086758	HUWE1	protein_coding	Q7Z6Z7	-0.161308	0.361994	0.304374	0.0823392	1	0	0	1
ENSG00000086827	ZW10	protein_coding	O43264	-0.452274	0.00542986	0.294942	0.174208	1	1	0	1
ENSG00000086848	ALG9	protein_coding	Q9H6U8	-0.221828	0.754614	-0.280742	0.72348	1	1	0	1
ENSG00000086967	MYBPC2	protein_coding	Q14324	0.00707624	NA	0.115841	NA	0	0	0	0
ENSG00000086991	NOX4	protein_coding	Q9NPH5	NA	NA	NA	NA	1	0	0	1
ENSG00000087008	ACOX3	protein_coding	O15254	0.207454	0.279623	0.0211191	0.955853	1	1	1	1
ENSG00000087053	MTMR2	protein_coding	Q13614	-0.275699	0.266763	-0.164192	0.625619	0	1	0	1
ENSG00000087074	PPP1R15A	protein_coding	O75807	0.479578	0.056449	-0.129553	0.733718	1	1	0	1
ENSG00000087076	HSD17B14	protein_coding	Q9BPX1	0.75199	0.102888	0.247644	0.705652	0	0	0	0
ENSG00000087077	TRIP6	protein_coding	Q15654	0.397261	0.00294218	-0.0976534	0.678418	1	1	0	1
ENSG00000087085	ACHE	protein_coding	P22303	1.0061	0.00272114	0.325383	0.513066	1	1	0	1
ENSG00000087086	FTL	protein_coding	P02792	0.712933	0.000359984	-0.684261	0.00047937	1	0	0	1
ENSG00000087087	SRRT	protein_coding	Q9BXP5	0.34919	0.0502683	0.53754	0.00550428	0	0	0	0
ENSG00000087088	BAX	protein_coding	Q07812	0.420351	0.000973126	0.0509835	0.845406	1	0	1	0
ENSG00000087095	NLK	protein_coding	Q9UBE8	-0.413585	0.231665	0.199755	0.699943	0	1	0	1
ENSG00000087111	PIGS	protein_coding	Q96S52	0.297708	0.0386886	-0.00595202	0.984161	1	0	0	1
ENSG00000087116	ADAMTS2	protein_coding	O95450	0.112333	0.815832	0.266997	0.610513	1	1	0	1
ENSG00000087128	TMPRSS11E	protein_coding	Q9UL52	NA	NA	NA	NA	1	0	0	1
ENSG00000087152	ATXN7L3	protein_coding	Q14CW9	-0.304265	0.0733478	-0.0658527	0.848067	0	1	0	1
ENSG00000087157	PGS1	protein_coding	Q32NB8	0.229326	0.359081	0.0991788	0.778811	1	1	1	1
ENSG00000087191	PSMC5	protein_coding	P62195	0.107493	0.532567	0.0416709	0.895741	1	1	0	1
ENSG00000087206	UIMC1	protein_coding	Q96RL1	0.12641	0.473055	0.093851	0.691226	0	0	0	0
ENSG00000087237	CETP	protein_coding	P11597	-0.161073	NA	0.0117138	NA	1	1	0	1
ENSG00000087245	MMP2	protein_coding	P08253	0.860365	0.00608475	0.41337	0.338914	1	1	0	1
ENSG00000087250	MT3	protein_coding	P25713	0.111138	NA	1.11854	NA	1	0	0	1
ENSG00000087253	LPCAT2	protein_coding	Q7L5N7	0.0456201	0.89791	0.160666	0.661492	1	1	0	1
ENSG00000087258	GNAO1	protein_coding	P09471	0.312827	0.447202	0.210773	0.687015	1	0	0	1
ENSG00000087263	OGFOD1	protein_coding	Q8N543	-0.286606	0.0350834	-0.207705	0.259932	0	0	0	0
ENSG00000087266	SH3BP2	protein_coding	P78314	-0.128361	0.715193	-0.0290895	0.951087	0	0	0	0
ENSG00000087269	NOP14	protein_coding	P78316	0.152616	0.499383	0.344366	0.0653752	1	0	0	1
ENSG00000087274	ADD1	protein_coding	P35611	0.12014	0.62849	0.290975	0.240401	1	1	0	1
ENSG00000087299	L2HGDH	protein_coding	Q9H9P8	-0.094951	0.747035	-0.115459	0.712795	1	0	1	0
ENSG00000087301	TXNDC16	protein_coding	Q9P2K2	-0.0776144	0.814458	0.453817	0.0696532	1	0	0	1
ENSG00000087302	C14orf166	protein_coding	#N/A	-0.0969309	0.609876	-0.142519	0.515283	0	0	0	0
ENSG00000087303	NID2	protein_coding	Q14112	0.865396	2.42002e-09	0.844455	1.91915e-06	1	1	0	1
ENSG00000087338	GMCL1	protein_coding	Q96IK5	-0.473391	0.0230081	-0.187232	0.586278	0	0	0	0
ENSG00000087365	SF3B2	protein_coding	Q13435	0.326313	0.148503	0.034117	0.936839	0	0	0	0
ENSG00000087448	KLHL42	protein_coding	Q9P2K6	-0.403268	0.0997417	-0.133937	0.770516	0	0	0	0
ENSG00000087460	GNAS	protein_coding	Q5JWF2	-0.0707249	0.747228	-0.388815	0.0461318	1	1	0	1
ENSG00000087470	DNM1L	protein_coding	O00429	-0.411358	0.00357782	0.0958499	0.71963	1	1	1	1
ENSG00000087494	PTHLH	protein_coding	P12272	0.566945	0.578674	0.493133	NA	1	1	0	1
ENSG00000087495	PHACTR3	protein_coding	Q96KR7	0.455163	0.60259	-0.192158	NA	0	0	0	0
ENSG00000087502	ERGIC2	protein_coding	Q96RQ1	-0.514016	0.00330754	-0.00350024	0.992522	1	1	0	1
ENSG00000087510	TFAP2C	protein_coding	Q92754	0.460213	0.140937	-0.0604813	0.91958	0	0	0	0
ENSG00000087586	AURKA	protein_coding	O14965	0.15151	0.548096	-0.59722	0.00164155	0	0	0	0
ENSG00000087589	CASS4	protein_coding	Q9NQ75	-0.868277	0.240846	-0.159303	NA	1	0	0	1
ENSG00000087842	PIR	protein_coding	O00625	0.370767	0.0481076	0.0495736	0.904045	0	0	0	0
ENSG00000087884	AAMDC	protein_coding	Q9H7C9	-0.0416744	0.911318	-0.376158	0.161	0	0	0	0
ENSG00000087903	RFX2	protein_coding	P48378	0.0715328	0.858646	-0.107133	0.800117	0	1	0	1
ENSG00000087995	METTL2A	protein_coding	Q96IZ6	-0.104591	0.667169	-0.0949084	0.762429	0	0	0	0
ENSG00000088002	SULT2B1	protein_coding	O00204	1.12135	0.0944069	-0.270619	0.729238	1	1	0	1
ENSG00000088035	ALG6	protein_coding	Q9Y672	0.437739	0.0156498	0.720271	4.67876e-05	1	1	0	1
ENSG00000088038	CNOT3	protein_coding	O75175	-0.319652	NA	0.900552	NA	0	0	0	0
ENSG00000088053	GP6	protein_coding	Q9HCN6	NA	NA	NA	NA	1	1	0	1
ENSG00000088179	PTPN4	protein_coding	P29074	-0.423379	0.243183	-0.240782	0.612299	0	1	1	1
ENSG00000088205	DDX18	protein_coding	Q9NVP1	-0.331953	0.0183113	0.737477	6.92945e-06	1	0	0	1
ENSG00000088247	KHSRP	protein_coding	Q92945	0.233254	0.0738297	0.10876	0.62594	1	0	0	1
ENSG00000088256	GNA11	protein_coding	P29992	0.175231	0.443941	0.0351086	0.918427	1	0	0	1
ENSG00000088280	ASAP3	protein_coding	Q8TDY4	NA	NA	NA	NA	0	1	0	1
ENSG00000088298	EDEM2	protein_coding	Q9BV94	0.128346	0.648064	-0.0697922	0.837888	1	1	0	1
ENSG00000088305	DNMT3B	protein_coding	Q9UBC3	0.0893821	0.726756	0.436807	0.0982479	0	1	0	1
ENSG00000088320	REM1	protein_coding	O75628	2.36472	NA	0.833569	NA	1	0	0	1
ENSG00000088325	TPX2	protein_coding	Q9ULW0	0.197267	0.219369	0.634751	0.00182167	0	0	0	0
ENSG00000088340	FER1L4	transcribed_unitary_pseudogene	A9Z1Z3	-0.623806	0.362843	-0.00512597	NA	1	0	0	1
ENSG00000088356	PDRG1	protein_coding	Q9NUG6	0.271086	0.106018	-0.657651	1.03134e-05	0	0	0	0
ENSG00000088367	EPB41L1	protein_coding	Q9H4G0	0.201688	0.551213	0.0474578	0.915657	1	1	0	1
ENSG00000088386	SLC15A1	protein_coding	P46059	-0.32229	0.8568	-0.0128953	NA	1	0	0	1
ENSG00000088387	DOCK9	protein_coding	Q9BZ29	-0.483667	0.0125732	0.237481	0.411405	1	0	0	1
ENSG00000088448	ANKRD10	protein_coding	Q9NXR5	-0.372172	0.0654053	-0.210305	0.489472	0	0	0	0
ENSG00000088451	TGDS	protein_coding	O95455	-0.524914	0.000767604	-0.167752	0.502831	0	0	0	0
ENSG00000088538	DOCK3	protein_coding	Q8IZD9	-0.341412	0.106322	0.181668	0.583028	0	0	0	0
ENSG00000088543	C3orf18	protein_coding	Q9UK00	-0.172157	0.806109	-0.11319	0.906684	1	0	0	1
ENSG00000088682	COQ9	protein_coding	O75208	0.554629	0.0275106	0.474357	0.0940578	0	0	1	0
ENSG00000088726	TMEM40	protein_coding	Q8WWA1	-0.749171	NA	-0.510971	NA	1	0	0	1
ENSG00000088727	KIF9	protein_coding	Q9HAQ2	0.168614	0.648803	-0.171042	0.684257	1	0	0	1
ENSG00000088756	ARHGAP28	protein_coding	Q9P2N2	0.215639	0.704978	0.304611	0.638707	0	1	0	1
ENSG00000088766	CRLS1	protein_coding	Q9UJA2	-0.4495	0.0340899	-0.139407	0.699943	1	0	1	0
ENSG00000088782	DEFB127	protein_coding	Q9H1M4	NA	NA	NA	NA	1	1	0	1
ENSG00000088808	PPP1R13B	protein_coding	Q96KQ4	-0.0223246	0.9419	-0.0124222	0.973953	1	0	0	1
ENSG00000088812	ATRN	protein_coding	O75882	0.226966	0.171903	0.64533	3.66805e-05	1	0	0	1
ENSG00000088826	SMOX	protein_coding	Q9NWM0	0.0737784	0.896239	0.127852	0.815891	0	1	0	1
ENSG00000088827	SIGLEC1	protein_coding	Q9BZZ2	-0.324017	NA	-0.0134488	NA	1	0	0	1
ENSG00000088832	FKBP1A	protein_coding	P62942	0.727209	0.000709001	-0.241792	0.452046	1	0	0	1
ENSG00000088833	NSFL1C	protein_coding	Q9UNZ2	0.504882	1.26706e-05	-0.0501618	0.872964	1	1	0	1
ENSG00000088836	SLC4A11	protein_coding	Q8NBS3	0.0191655	0.964438	0.38203	0.281475	1	1	0	1
ENSG00000088854	C20orf194	protein_coding	Q5TEA3	-0.586482	0.0022913	0.0419672	0.923429	0	0	0	0
ENSG00000088876	ZNF343	protein_coding	Q6P1L6	-0.474628	0.118085	-0.0944166	0.875408	0	0	0	0
ENSG00000088881	EBF4	protein_coding	Q9BQW3	-0.0408829	0.958354	-0.377288	0.502645	0	0	0	0
ENSG00000088882	CPXM1	protein_coding	Q96SM3	-0.619427	NA	1.16319	NA	1	1	0	1
ENSG00000088888	MAVS	protein_coding	Q7Z434	-0.0412083	0.868701	0.0223149	0.946531	1	0	1	0
ENSG00000088899	LZTS3	protein_coding	O60299	-0.0658851	0.879549	0.174934	0.707434	0	1	0	1
ENSG00000088926	F11	protein_coding	P03951	0.681035	NA	1.67896	NA	1	1	0	1
ENSG00000088930	XRN2	protein_coding	Q9H0D6	-0.259045	0.0484223	0.652755	2.95546e-05	1	0	0	1
ENSG00000088970	KIZ	protein_coding	Q2M2Z5	-0.253314	0.246353	0.00118232	0.997656	0	0	0	0
ENSG00000088986	DYNLL1	protein_coding	P63167	-0.0102952	0.976991	-0.0319224	0.927079	1	0	0	1
ENSG00000088992	TESC	protein_coding	Q96BS2	0.493545	0.0661129	0.370798	0.237523	1	0	0	1
ENSG00000089006	SNX5	protein_coding	Q9Y5X3	0.117393	0.57125	-0.491325	0.00289669	0	0	0	0
ENSG00000089009	RPL6	protein_coding	Q02878	-0.20519	0.655997	-0.548537	0.12264	1	0	0	1
ENSG00000089012	SIRPG	protein_coding	Q9P1W8	-0.834916	NA	NA	NA	1	0	0	1
ENSG00000089022	MAPKAPK5	protein_coding	Q8IW41	-0.292395	0.217358	-0.193696	0.537424	0	0	0	0
ENSG00000089041	P2RX7	protein_coding	Q99572	1.23208	NA	0.790373	NA	1	1	0	1
ENSG00000089048	ESF1	protein_coding	Q9H501	-0.206055	0.262735	0.554259	0.000950754	1	0	0	1
ENSG00000089050	RBBP9	protein_coding	O75884	0.0624985	0.907178	0.358123	0.354355	0	0	0	0
ENSG00000089053	ANAPC5	protein_coding	Q9UJX4	0.509459	3.66804e-06	0.310694	0.0424921	0	0	0	0
ENSG00000089057	SLC23A2	protein_coding	Q9UGH3	0.0533122	0.82277	-0.0901103	0.732448	1	1	0	1
ENSG00000089060	SLC8B1	protein_coding	Q6J4K2	0.0277298	0.946488	0.165067	0.661841	1	1	0	1
ENSG00000089063	TMEM230	protein_coding	Q96A57	0.402733	0.10141	-0.191266	0.596835	1	1	0	1
ENSG00000089091	DZANK1	protein_coding	Q9NVP4	-0.298708	0.628995	-0.100027	0.909279	0	0	0	0
ENSG00000089094	KDM2B	protein_coding	Q8NHM5	-0.134685	0.614732	0.118836	0.732872	0	0	0	0
ENSG00000089101	CFAP61	protein_coding	Q8NHU2	0.386095	0.848498	0.863748	NA	0	0	0	0
ENSG00000089116	LHX5	protein_coding	Q9H2C1	-0.834916	NA	NA	NA	0	0	0	0
ENSG00000089123	TASP1	protein_coding	Q9H6P5	-0.422061	0.119804	0.0547448	0.923008	0	1	0	1
ENSG00000089127	OAS1	protein_coding	P00973	NA	NA	-0.810278	NA	1	0	0	1
ENSG00000089154	GCN1	protein_coding	Q92616	0.0748719	0.678897	0.563321	3.38287e-05	1	0	0	1
ENSG00000089157	RPLP0	protein_coding	P05388	0.595144	2.30582e-05	0.333204	0.106577	1	1	0	1
ENSG00000089159	PXN	protein_coding	P49023	0.484616	0.0010676	0.169804	0.451505	1	0	0	1
ENSG00000089163	SIRT4	protein_coding	Q9Y6E7	0.311793	0.554912	-0.464004	0.381997	0	0	1	0
ENSG00000089169	RPH3A	protein_coding	Q9Y2J0	0.58706	NA	0.281544	NA	1	0	0	1
ENSG00000089177	KIF16B	protein_coding	Q96L93	0.0200318	0.949019	0.0461447	0.889866	1	0	0	1
ENSG00000089195	TRMT6	protein_coding	Q9UJA5	0.132312	0.740191	0.463505	0.141075	0	0	0	0
ENSG00000089199	CHGB	protein_coding	P05060	0.441129	0.641377	0.405691	NA	1	1	0	1
ENSG00000089220	PEBP1	protein_coding	P30086	0.904473	4.35814e-10	-0.268167	0.205184	1	1	0	1
ENSG00000089225	TBX5	protein_coding	Q99593	1.63339	NA	1.67896	NA	0	0	0	0
ENSG00000089234	BRAP	protein_coding	Q7Z569	-0.0833327	0.70942	-0.433535	0.00807648	0	0	0	0
ENSG00000089248	ERP29	protein_coding	P30040	0.905709	9.82704e-17	-0.0103923	0.976453	1	1	0	1
ENSG00000089250	NOS1	protein_coding	P29475	-1.59642	NA	NA	NA	1	1	0	1
ENSG00000089280	FUS	protein_coding	P35637	-0.0520794	0.875493	0.302683	0.241097	0	0	0	0
ENSG00000089289	IGBP1	protein_coding	P78318	0.0451073	0.855451	-0.0789691	0.803243	0	0	0	0
ENSG00000089327	FXYD5	protein_coding	Q96DB9	1.18876	1.17589e-05	-0.10648	0.808806	1	1	0	1
ENSG00000089335	ZNF302	protein_coding	Q9NR11	-0.416694	0.34157	-0.298761	0.584571	0	1	0	1
ENSG00000089351	GRAMD1A	protein_coding	Q96CP6	-0.0602868	0.836421	0.031384	0.935393	1	1	0	1
ENSG00000089356	FXYD3	protein_coding	Q14802	-1.73734	NA	-0.810278	NA	1	1	0	1
ENSG00000089472	HEPH	protein_coding	Q9BQS7	NA	NA	NA	NA	1	1	0	1
ENSG00000089486	CDIP1	protein_coding	Q9H305	-0.466561	0.565408	0.0420125	NA	0	0	0	0
ENSG00000089505	CMTM1	protein_coding	Q8IZ96	-0.491275	0.728547	-0.752959	NA	1	0	0	1
ENSG00000089558	KCNH4	protein_coding	Q9UQ05	-1.03762	0.196278	-0.547644	NA	1	0	0	1
ENSG00000089597	GANAB	protein_coding	Q14697	0.600459	5.82114e-05	0.816548	1.58805e-07	1	1	0	1
ENSG00000089639	GMIP	protein_coding	Q9P107	-0.213164	0.388541	-0.219016	0.419205	1	1	0	1
ENSG00000089682	RBM41	protein_coding	Q96IZ5	0.0538252	0.825599	0.111076	0.675332	0	0	0	0
ENSG00000089685	BIRC5	protein_coding	O15392	0.402189	0.0208644	-0.240315	0.306133	0	0	0	0
ENSG00000089692	LAG3	protein_coding	P18627	-1.79425	NA	-0.613083	NA	1	1	0	1
ENSG00000089693	MLF2	protein_coding	Q15773	0.100612	0.689141	0.171826	0.485326	1	1	0	1
ENSG00000089723	OTUB2	protein_coding	Q96DC9	NA	NA	-1.34068	NA	0	0	0	0
ENSG00000089737	DDX24	protein_coding	Q9GZR7	0.93468	0.0545664	1.07103	0.0447097	1	0	0	1
ENSG00000089775	ZBTB25	protein_coding	P24278	-0.329626	0.230698	0.0449981	0.928972	0	0	0	0
ENSG00000089818	NECAP1	protein_coding	Q8NC96	0.0731799	0.749424	-0.159895	0.462193	1	1	0	1
ENSG00000089820	ARHGAP4	protein_coding	P98171	-0.190937	0.852342	-0.239959	NA	1	0	0	1
ENSG00000089847	ANKRD24	protein_coding	#N/A	0.0186533	0.981927	-0.241716	0.726359	0	0	0	0
ENSG00000089876	DHX32	protein_coding	Q7L7V1	-0.612383	0.00707384	0.170172	0.629218	0	0	0	0
ENSG00000089902	RCOR1	protein_coding	Q9UKL0	-0.0337552	0.909598	-0.361598	0.120467	0	1	0	1
ENSG00000089916	GPATCH2L	protein_coding	Q9NWQ4	0.0302173	0.924401	-0.153297	0.59427	0	0	0	0
ENSG00000090006	LTBP4	protein_coding	Q8N2S1	0.292971	0.157736	0.220085	0.333395	1	1	0	1
ENSG00000090013	BLVRB	protein_coding	P30043	0.757376	2.34971e-07	-0.244493	0.273944	1	1	0	1
ENSG00000090020	SLC9A1	protein_coding	P19634	0.364253	0.110641	-0.060152	0.868378	1	1	0	1
ENSG00000090054	SPTLC1	protein_coding	O15269	-0.301031	0.0141156	0.0817063	0.702041	1	1	0	1
ENSG00000090060	PAPOLA	protein_coding	P51003	-0.521069	0.0012696	-0.00965492	0.975863	0	0	0	0
ENSG00000090061	CCNK	protein_coding	O75909	0.89228	0.00162301	-0.300167	0.460723	0	0	0	0
ENSG00000090097	PCBP4	protein_coding	P57723	0.159799	0.739107	-0.160981	0.779771	0	0	0	0
ENSG00000090104	RGS1	protein_coding	Q08116	1.11731	NA	1.16319	NA	1	0	0	1
ENSG00000090238	YPEL3	protein_coding	P61236	0.221102	0.503595	-0.668143	0.0130158	0	0	0	0
ENSG00000090263	MRPS33	protein_coding	Q9Y291	0.00707657	0.986451	-0.390205	0.125653	0	0	1	0
ENSG00000090266	NDUFB2	protein_coding	O95178	0.198563	0.101134	-0.239088	0.160888	0	0	1	0
ENSG00000090273	NUDC	protein_coding	Q9Y266	0.22706	0.307216	0.198748	0.44812	0	0	0	0
ENSG00000090316	MAEA	protein_coding	Q7L5Y9	0.257943	0.230996	-0.210142	0.341678	1	0	0	1
ENSG00000090339	ICAM1	protein_coding	P05362	1.44382	NA	0.80367	NA	1	1	0	1
ENSG00000090372	STRN4	protein_coding	Q9NRL3	0.714097	1.06192e-05	0.120684	0.645412	1	0	0	1
ENSG00000090376	IRAK3	protein_coding	Q9Y616	-0.0820335	NA	0.502204	NA	1	1	0	1
ENSG00000090382	LYZ	protein_coding	P61626	2.31614	NA	-0.0476681	NA	1	1	0	1
ENSG00000090402	SI	protein_coding	P14410	-0.834916	NA	-2.1413	NA	1	0	0	1
ENSG00000090432	MUL1	protein_coding	Q969V5	0.304893	0.0867429	-0.506878	0.00328268	1	0	1	0
ENSG00000090447	TFAP4	protein_coding	Q01664	0.543988	0.000135675	0.183849	0.42646	0	0	0	0
ENSG00000090470	PDCD7	protein_coding	Q8N8D1	0.220872	0.386659	0.190932	0.547479	0	1	0	1
ENSG00000090487	SPG21	protein_coding	Q9NZD8	0.155641	0.627442	-0.0822632	0.850643	1	1	0	1
ENSG00000090512	FETUB	protein_coding	Q9UGM5	1.13457	NA	2.15231	NA	1	1	0	1
ENSG00000090520	DNAJB11	protein_coding	Q9UBS4	0.405847	0.00989989	0.142039	0.585137	1	1	0	1
ENSG00000090530	P3H2	protein_coding	Q8IVL5	-0.0951767	0.879549	0.114568	0.880781	1	1	0	1
ENSG00000090534	THPO	protein_coding	P40225	0.319489	NA	-0.969627	NA	1	1	0	1
ENSG00000090539	CHRD	protein_coding	Q9H2X0	0.630055	0.301267	-0.350093	0.627369	1	1	0	1
ENSG00000090554	FLT3LG	protein_coding	P49771	-0.20027	0.925785	1.04647	NA	1	0	0	1
ENSG00000090565	RAB11FIP3	protein_coding	O75154	-0.4311	NA	0.527984	NA	1	1	0	1
ENSG00000090581	GNPTG	protein_coding	Q9UJJ9	1.0385	2.02747e-08	0.193358	0.577302	1	1	0	1
ENSG00000090612	ZNF268	protein_coding	Q14587	-1.0902	0.00101213	-0.543248	0.311823	0	0	0	0
ENSG00000090615	GOLGA3	protein_coding	Q08378	-0.276554	0.130166	-0.0673646	0.824616	1	1	0	1
ENSG00000090621	PABPC4	protein_coding	Q13310	0.176954	0.224595	0.912389	6.33396e-11	0	0	0	0
ENSG00000090659	CD209	protein_coding	Q9NNX6	-0.249381	0.63011	0.0446208	0.956756	1	0	0	1
ENSG00000090661	CERS4	protein_coding	Q9HA82	0.268915	0.419344	-0.114296	0.794346	1	1	0	1
ENSG00000090674	MCOLN1	protein_coding	Q9GZU1	0.472741	0.00953469	0.352621	0.125663	1	1	0	1
ENSG00000090686	USP48	protein_coding	Q86UV5	0.0280191	0.92535	0.273161	0.194007	0	0	0	0
ENSG00000090776	EFNB1	protein_coding	P98172	0.568074	0.00556352	0.134864	0.68215	1	1	0	1
ENSG00000090857	PDPR	protein_coding	Q8NCN5	-0.468452	0.0177471	-0.455052	0.0536185	0	0	1	0
ENSG00000090861	AARS	protein_coding	P49588	0.483683	0.000260062	0.650334	2.65721e-05	1	0	0	1
ENSG00000090863	GLG1	protein_coding	Q92896	0.756547	4.88293e-05	0.984589	1.46555e-07	1	1	0	1
ENSG00000090889	KIF4A	protein_coding	O95239	-0.0831347	0.672336	0.508052	0.0038523	1	0	0	1
ENSG00000090905	TNRC6A	protein_coding	Q8NDV7	-0.0791298	0.779102	0.137311	0.6495	1	1	0	1
ENSG00000090924	PLEKHG2	protein_coding	Q9H7P9	-0.0717206	0.801549	0.00281737	0.993886	0	0	0	0
ENSG00000090932	DLL3	protein_coding	Q9NYJ7	0.819217	0.00121401	0.907995	0.00136544	1	1	0	1
ENSG00000090971	NAT14	protein_coding	Q8WUY8	0.351822	0.0903472	0.500443	0.0236816	1	0	0	1
ENSG00000090975	PITPNM2	protein_coding	Q9BZ72	-0.213293	0.630359	-0.025082	0.969637	1	1	0	1
ENSG00000090989	EXOC1	protein_coding	Q9NV70	0.192419	0.227417	0.858454	5.13356e-07	1	1	0	1
ENSG00000091009	RBM27	protein_coding	Q9P2N5	-0.203502	0.612425	-0.0369093	0.951087	0	0	0	0
ENSG00000091010	POU4F3	protein_coding	Q15319	0.738416	NA	-0.10285	NA	0	0	0	0
ENSG00000091039	OSBPL8	protein_coding	Q9BZF1	-0.321577	0.0224825	-0.0712586	0.791252	1	1	0	1
ENSG00000091073	DTX2	protein_coding	Q86UW9	-0.592673	0.364864	-0.477279	NA	0	0	0	0
ENSG00000091106	NLRC4	protein_coding	Q9NPP4	-1.15865	0.350536	-1.35076	NA	0	0	0	0
ENSG00000091127	PUS7	protein_coding	Q96PZ0	-0.0652983	0.773445	0.321473	0.0458172	0	0	0	0
ENSG00000091128	LAMB4	protein_coding	A4D0S4	-0.751564	NA	-0.881267	NA	0	1	0	1
ENSG00000091129	NRCAM	protein_coding	Q92823	0.841302	7.40277e-06	0.895537	3.94719e-05	1	1	0	1
ENSG00000091136	LAMB1	protein_coding	P07942	0.307442	0.0161303	0.86839	3.13504e-11	1	1	0	1
ENSG00000091137	SLC26A4	protein_coding	O43511	-0.932938	0.526015	-0.519936	NA	1	0	0	1
ENSG00000091138	SLC26A3	protein_coding	P40879	-2.27137	NA	-3.42077	NA	1	0	0	1
ENSG00000091140	DLD	protein_coding	P09622	-0.202858	0.155135	0.196426	0.313058	0	0	1	0
ENSG00000091157	WDR7	protein_coding	Q9Y4E6	-0.113614	0.621046	0.339929	0.114537	0	0	0	0
ENSG00000091164	TXNL1	protein_coding	O43396	-0.115775	0.481604	-0.0899127	0.711074	0	0	0	0
ENSG00000091181	IL5RA	protein_coding	Q01344	-1.12999	NA	-0.109219	NA	1	1	0	1
ENSG00000091262	ABCC6	protein_coding	O95255	1.63339	NA	-0.600429	NA	1	1	0	1
ENSG00000091317	CMTM6	protein_coding	Q9NX76	0.115628	0.603763	0.266586	0.205633	1	0	0	1
ENSG00000091409	ITGA6	protein_coding	P23229	0.263927	0.315169	0.620874	0.0085825	1	0	0	1
ENSG00000091428	RAPGEF4	protein_coding	Q8WZA2	-0.222979	0.517885	0.206493	0.663498	1	0	0	1
ENSG00000091436	AC013461.1	protein_coding	#N/A	-0.231351	0.203026	-0.00727557	0.98311	0	0	0	0
ENSG00000091482	SMPX	protein_coding	Q9UHP9	0.0319747	NA	0.640513	NA	0	1	0	1
ENSG00000091483	FH	protein_coding	P07954	0.00922257	0.979099	0.0203549	0.957551	0	0	1	0
ENSG00000091490	SEL1L3	protein_coding	Q68CR1	-0.156107	0.713486	0.251753	0.577521	1	0	0	1
ENSG00000091513	TF	protein_coding	P02787	-0.206117	NA	1.10733	NA	1	1	0	1
ENSG00000091527	CDV3	protein_coding	Q9UKY7	0.200909	0.844463	0.507683	0.586198	1	1	0	1
ENSG00000091536	MYO15A	protein_coding	Q9UKN7	-0.126861	0.929035	-0.23439	NA	0	0	0	0
ENSG00000091542	ALKBH5	protein_coding	Q6P6C2	-0.112239	0.554846	-0.236281	0.17392	1	1	0	1
ENSG00000091583	APOH	protein_coding	P02749	NA	NA	NA	NA	1	1	0	1
ENSG00000091592	NLRP1	protein_coding	Q9C000	0.160646	0.688644	-0.716612	0.00473451	0	0	0	0
ENSG00000091622	PITPNM3	protein_coding	Q9BZ71	-0.351308	0.449762	0.01379	0.987274	1	1	0	1
ENSG00000091640	SPAG7	protein_coding	O75391	0.417023	0.0110936	0.0990462	0.73167	0	0	0	0
ENSG00000091651	ORC6	protein_coding	Q9Y5N6	0.389752	0.0043991	-0.728156	7.99535e-07	1	0	0	1
ENSG00000091656	ZFHX4	protein_coding	Q86UP3	0.0265663	0.90942	0.109618	0.634695	0	0	0	0
ENSG00000091664	SLC17A6	protein_coding	Q9P2U8	NA	NA	NA	NA	1	0	0	1
ENSG00000091704	CPA1	protein_coding	P15085	-1.9324	NA	1.16319	NA	1	1	0	1
ENSG00000091732	ZC3HC1	protein_coding	Q86WB0	-0.0249561	0.931011	0.00892666	0.980323	0	0	0	0
ENSG00000091831	ESR1	protein_coding	P03372	-1.19	NA	-0.343906	NA	1	1	0	1
ENSG00000091844	RGS17	protein_coding	Q9UGC6	-0.453861	0.435119	-0.457385	0.519088	1	1	0	1
ENSG00000091879	ANGPT2	protein_coding	O15123	-1.00555	NA	-0.724192	NA	1	1	0	1
ENSG00000091947	TMEM101	protein_coding	Q96IK0	0.238041	0.158456	-0.133144	0.629621	1	1	0	1
ENSG00000091972	CD200	protein_coding	P41217	NA	NA	-0.777548	NA	1	1	0	1
ENSG00000091986	CCDC80	protein_coding	Q76M96	0.753794	0.00257169	0.409599	0.191036	0	1	0	1
ENSG00000092009	CMA1	protein_coding	P23946	NA	NA	-0.810278	NA	1	1	0	1
ENSG00000092010	PSME1	protein_coding	Q06323	0.513115	0.0029228	0.0212246	0.95769	0	0	0	0
ENSG00000092020	PPP2R3C	protein_coding	Q969Q6	-0.15148	0.523983	-0.158074	0.620394	1	1	0	1
ENSG00000092036	HAUS4	protein_coding	Q9H6D7	0.153184	0.687573	-0.275626	0.472461	0	1	0	1
ENSG00000092051	JPH4	protein_coding	Q96JJ6	0.443986	0.843182	0.63078	NA	1	0	0	1
ENSG00000092054	MYH7	protein_coding	P12883	NA	NA	-2.97781	NA	0	0	0	0
ENSG00000092067	CEBPE	protein_coding	Q15744	-0.834916	NA	NA	NA	0	0	0	0
ENSG00000092068	SLC7A8	protein_coding	Q9UHI5	0.289548	0.275036	0.128133	0.71963	1	0	0	1
ENSG00000092094	OSGEP	protein_coding	Q9NPF4	-0.00205898	0.994247	-0.177397	0.461338	1	1	0	1
ENSG00000092096	SLC22A17.1	protein_coding	#N/A	0.40535	0.564584	0.24419	0.775934	0	0	0	0
ENSG00000092098	RNF31	protein_coding	Q96EP0	0.100584	0.76911	0.12878	0.744886	0	0	0	0
ENSG00000092108	SCFD1	protein_coding	Q8WVM8	-0.468608	0.0189664	-0.0691242	0.840818	1	0	0	1
ENSG00000092140	G2E3	protein_coding	Q7L622	-0.308069	0.0748227	0.415358	0.0382096	0	1	0	1
ENSG00000092148	HECTD1	protein_coding	Q9ULT8	-0.328324	0.0072299	0.779498	1.27915e-08	0	0	0	0
ENSG00000092199	HNRNPC	protein_coding	P07910	0.291715	0.356266	-0.36323	0.24975	1	0	0	1
ENSG00000092200	RPGRIP1	protein_coding	Q96KN7	-1.47932	0.13145	-0.738797	NA	0	0	0	0
ENSG00000092201	SUPT16H	protein_coding	Q9Y5B9	-0.316463	0.0790378	1.00483	1.44094e-06	0	0	0	0
ENSG00000092203	TOX4	protein_coding	O94842	-0.14254	0.505822	-0.472089	0.00781423	0	1	0	1
ENSG00000092208	GEMIN2	protein_coding	O14893	-0.104034	0.663097	-0.114343	0.663225	0	0	0	0
ENSG00000092295	TGM1	protein_coding	P22735	-0.377636	0.644164	-0.027043	NA	1	0	0	1
ENSG00000092330	TINF2	protein_coding	Q9BSI4	0.545256	0.00347018	0.325937	0.209988	0	1	0	1
ENSG00000092345	DAZL	protein_coding	Q92904	NA	NA	NA	NA	0	0	0	0
ENSG00000092377	TBL1Y	protein_coding	Q9BQ87	-0.454786	NA	2.31161	NA	0	0	0	0
ENSG00000092421	SEMA6A	protein_coding	Q9H2E6	-0.0966866	0.679779	0.252659	0.286966	1	1	0	1
ENSG00000092439	TRPM7	protein_coding	Q96QT4	-0.483926	0.104621	0.0816788	0.872694	1	0	0	1
ENSG00000092445	TYRO3	protein_coding	Q06418	0.261969	0.275553	0.103026	0.780393	1	0	0	1
ENSG00000092470	WDR76	protein_coding	Q9H967	-0.182894	0.243554	0.0486808	0.871933	0	0	0	0
ENSG00000092529	CAPN3	protein_coding	P20807	0.495791	NA	0.711249	NA	1	0	0	1
ENSG00000092531	SNAP23	protein_coding	O00161	0.0165682	0.957172	-0.12037	0.628936	1	1	0	1
ENSG00000092607	TBX15	protein_coding	Q96SF7	-1.32541	NA	-1.29303	NA	0	0	0	0
ENSG00000092621	PHGDH	protein_coding	O43175	0.547723	3.37214e-05	0.176978	0.451269	0	1	0	1
ENSG00000092758	COL9A3	protein_coding	Q14050	0.561938	0.464764	0.175732	0.872953	1	1	0	1
ENSG00000092820	EZR	protein_coding	P15311	0.229074	0.123652	0.890032	8.11737e-07	1	1	0	1
ENSG00000092841	MYL6	protein_coding	P60660	0.679501	0.00283838	-0.123816	0.774557	1	0	0	1
ENSG00000092847	AGO1	protein_coding	Q9UL18	0.0918836	0.635838	-0.141763	0.551752	0	0	0	0
ENSG00000092850	TEKT2	protein_coding	Q9UIF3	0.0423945	0.968131	-0.124306	NA	0	0	0	0
ENSG00000092853	CLSPN	protein_coding	Q9HAW4	0.0638297	0.821752	0.350646	0.11575	1	1	0	1
ENSG00000092871	RFFL	protein_coding	Q8WZ73	-0.296348	0.558767	-0.0553383	0.948602	1	1	0	1
ENSG00000092929	UNC13D	protein_coding	Q70J99	0.321352	0.846492	-0.149213	NA	1	1	0	1
ENSG00000092931	MFSD11	protein_coding	O43934	0.186798	0.623736	0.0409328	0.939982	1	0	0	1
ENSG00000092964	DPYSL2	protein_coding	Q16555	0.514355	0.00233711	0.353546	0.076813	1	1	0	1
ENSG00000092969	TGFB2	protein_coding	P61812	0.256461	0.796616	-0.597824	0.435203	1	1	0	1
ENSG00000092978	GPATCH2	protein_coding	Q9NW75	-0.0830889	0.660547	-0.0480908	0.855381	0	0	0	0
ENSG00000093000	NUP50	protein_coding	Q9UKX7	-0.242819	0.301267	-0.103423	0.758332	0	0	0	0
ENSG00000093009	CDC45	protein_coding	O75419	0.652587	0.000107999	0.422973	0.0299281	0	1	0	1
ENSG00000093010	COMT	protein_coding	P21964	0.505607	0.000849272	0.0752344	0.789083	1	1	1	1
ENSG00000093072	CECR1	protein_coding	#N/A	-1.13205	NA	-0.906552	NA	0	1	0	1
ENSG00000093100	XXbac-B461K10.4	processed_transcript	#N/A	-1.33224	NA	-0.205882	NA	0	0	0	0
ENSG00000093134	VNN3	protein_coding	Q9NY84	NA	NA	NA	NA	1	1	0	1
ENSG00000093144	ECHDC1	protein_coding	Q9NTX5	-0.00384766	0.987738	0.128035	0.574099	0	1	1	1
[truncated: 55,993 more rows]

## Sheet: ERM overlap
UniprotID	Log2 (ERM E/I)	P-adj (ERM E/I)	Log2 (Enrich E/N)	P-adj (Enrich E/N)	GOCC secretome	HPA secretome	MitoCarta	Secretome	OptoRibo-seq	Proximity Ribo-seq
Q9BS26	0.784863	1.86582e-11	0.382201	0.0098543	1	1	0	1	1	1
P13611	0.461451	0.000441636	0.849971	4.3848e-09	1	1	0	1	1	1
P11021	1.30985	4.13448e-21	0.351415	0.0444515	1	1	0	1	1	1
Q14126	0.426928	2.86033e-05	0.561482	2.36843e-05	1	1	0	1	1	1
Q14766	0.344027	0.0433472	1.00742	1.5376e-09	1	1	0	1	1	1
Q15293	0.741548	6.12163e-08	0.448759	0.0180324	1	1	0	1	1	1
P61619	0.63471	1.00639e-08	0.461034	0.000298437	1	1	0	1	1	1
Q9NX61	0.833291	4.34635e-12	0.511293	0.000237597	1	0	0	1	1	1
P10619	0.541057	0.000782621	0.509876	0.00501252	1	1	0	1	1	1
Q14554	0.670481	1.7e-06	0.397495	0.0344112	1	1	0	1	1	1
Q9H813	0.623085	0.000349671	0.439514	0.0314366	1	0	0	1	1	1
Q92859	0.646244	2.98718e-08	0.575791	8.51083e-05	1	1	0	1	1	1
P80303	0.630207	0.0133798	0.79402	0.00178833	1	1	1	1	1	1
O15460	0.681622	5.1787e-07	0.630381	5.5735e-05	1	1	0	1	1	1
Q8WTV0	0.310807	0.0368762	0.408559	0.0156744	1	1	0	1	1	1
P43121	0.577135	0.00182576	0.498263	0.021624	1	1	0	1	1	1
O75487	0.899945	1.23275e-10	0.941317	1.52381e-08	1	1	0	1	1	1
Q9HD45	0.422983	0.000524775	0.482798	0.00117992	1	1	0	1	1	1
Q02809	0.685139	8.24458e-06	0.549824	0.000138519	1	1	0	1	1	1
Q9Y672	0.437739	0.0156498	0.720271	4.67876e-05	1	1	0	1	1	1
Q14697	0.600459	5.82114e-05	0.816548	1.58805e-07	1	1	0	1	1	1
Q92896	0.756547	4.88293e-05	0.984589	1.46555e-07	1	1	0	1	1	1
P07942	0.307442	0.0161303	0.86839	3.13504e-11	1	1	0	1	1	1
Q9UH99	0.611515	1.11662e-05	0.487027	0.000882255	1	0	0	1	1	1
O43405	0.711455	3.78917e-05	0.474969	0.0209291	1	1	0	1	1	1
P55058	0.999282	7.9509e-10	0.443163	0.0171073	1	1	0	1	1	1
P51798	0.360105	0.0282042	0.391677	0.02715	1	0	0	1	1	1
P00750	0.65641	1.20343e-08	0.768017	7.15803e-09	1	1	0	1	1	1
Q15043	0.463516	0.000921268	0.457387	0.020996	1	1	0	1	1	1
Q02818	1.17643	2.24811e-10	0.535772	0.00543537	1	1	0	1	1	1
Q15758	0.837365	4.44948e-08	0.505366	0.00473814	1	1	0	1	1	1
Q13332	0.450199	0.0158806	0.538807	0.00321541	1	1	0	1	1	1
Q9H3G5	0.413716	0.000221203	0.568821	5.55836e-06	0	1	0	1	1	1
O60568	0.968152	1.00235e-12	0.860274	7.15803e-09	1	1	0	1	1	1
P38571	0.676771	3.51936e-10	0.469606	0.000374625	1	1	0	1	1	1
P16870	0.467748	0.000878377	0.361137	0.0410138	1	1	0	1	1	1
P53634	0.34681	0.0104141	0.77924	4.3848e-09	1	1	0	1	1	1
Q13308	0.543727	6.0005e-05	0.576021	3.9407e-05	1	1	0	1	1	1
Q99808	0.482526	0.00104445	0.491524	0.00146149	1	0	0	1	1	1
Q13724	1.00501	1.23063e-07	0.974677	2.1193e-09	1	1	0	1	1	1
P38435	0.835156	1.09182e-08	0.418405	0.0294833	1	0	0	1	1	1
O00391	0.773724	5.05438e-08	0.425967	0.0337866	1	1	0	1	1	1
P14543	0.92112	2.60349e-12	0.89588	5.36276e-10	1	1	0	1	1	1
P04844	0.923514	3.7616e-10	0.424801	0.0286901	1	1	0	1	1	1
P43307	0.889784	0.000118592	0.553351	0.0438841	1	1	0	1	1	1
P27824	0.761542	4.67485e-10	0.565247	7.14084e-05	1	1	0	1	1	1
Q8N766	0.518388	1.2058e-05	0.721746	3.75845e-08	1	1	0	1	1	1
Q8NBJ7	0.53326	0.022469	0.506286	0.0467518	1	1	0	1	1	1
P01130	0.488151	0.000139127	0.692761	4.75335e-07	1	1	0	1	1	1
P14314	1.18069	2.41629e-13	0.876833	8.4378e-07	1	1	0	1	1	1
Q8TEM1	0.446143	0.000392943	0.48339	0.000669059	1	0	0	1	1	1
Q04721	0.577714	1.27326e-06	0.652928	1.44094e-06	1	1	0	1	1	1
Q96QD8	0.567112	2.43715e-09	0.36723	0.0058646	1	1	0	1	1	1
Q02487	0.53336	0.00178599	0.757403	0.000134116	1	0	0	1	1	1
Q14574	0.367281	0.0117742	0.666865	1.91915e-06	1	1	0	1	1	1
P08572	0.906833	8.45793e-12	1.00304	7.52163e-12	1	1	0	1	1	1
P46977	0.339248	0.0145953	0.374615	0.0230838	1	1	0	1	1	1
P07711	0.726032	7.95625e-11	0.651601	4.35677e-07	1	1	0	1	1	1
Q13438	0.929529	6.30481e-18	0.69948	2.44606e-05	1	1	0	1	1	1
Q07065	0.42423	0.000976616	0.543159	0.000193047	1	0	0	1	1	1
Q9NYU2	0.315871	0.0164858	0.661579	3.4118e-06	1	0	0	1	1	1
Q14108	0.711997	3.06982e-06	0.532785	0.00265501	1	0	0	1	1	1
P35556	0.509613	1.26275e-05	1.21808	2.62359e-24	1	1	0	1	1	1
P30825	0.321167	0.00268884	0.399928	0.00131572	1	0	0	1	1	1
Q9H3N1	0.726397	3.48358e-05	0.48866	0.0259821	1	1	0	1	1	1
O15118	0.48433	0.00228301	0.471676	0.0106053	1	1	0	1	1	1
Q96AY3	0.414856	0.00170694	0.723015	2.76965e-07	1	1	1	1	1	1
P12109	0.479563	0.000103707	0.425832	0.00296456	1	1	0	1	1	1
P12110	0.763576	3.56076e-07	0.440555	0.0179899	1	1	0	1	1	1
P05067	0.803745	3.3727e-06	0.856416	1.37317e-06	1	1	0	1	1	1
P29317	0.43854	0.0101197	0.47485	0.0101012	1	1	0	1	1	1
Q92643	0.472061	1.67086e-05	0.369951	0.00365243	1	1	0	1	1	1
P10586	0.422614	0.00023541	0.445301	0.0016124	1	1	0	1	1	1
Q13444	0.421774	0.0112917	0.350607	0.0433588	1	1	0	1	1	1
Q10471	0.525204	0.000788896	0.585913	0.000315347	1	1	0	1	1	1
Q8NBP0	0.308114	0.0447711	0.548209	8.353e-05	0	1	0	1	1	1
P51654	0.810536	2.76966e-06	0.698134	0.00033501	1	1	0	1	1	1
P46531	1.24899	1.26355e-15	0.751435	2.91736e-06	1	0	0	1	1	1
P50454	0.894749	3.48422e-09	0.348086	0.0435287	1	1	0	1	1	1
P13591	0.855197	2.53547e-05	0.85708	1.12575e-05	1	1	0	1	1	1
Q8NHP8	0.62328	0.000134732	0.458356	0.0239917	0	1	0	1	1	1
P17302	0.616354	0.00187112	0.621183	0.00336996	1	1	0	1	1	1
Q5JRA6	0.425305	0.0065067	0.608828	9.59437e-05	1	1	0	1	1	1
Q9UHI8	0.360871	0.00667818	0.879694	1.68068e-09	1	1	0	1	1	1
P13667	0.686958	6.14616e-06	0.598385	0.000279989	1	1	0	1	1	1
Q969P0	0.621697	0.000297086	0.601649	0.000579426	1	1	0	1	1	1
P05023	0.750249	2.37431e-08	0.625446	6.26746e-06	1	0	0	1	1	1
Q12841	0.505075	2.29566e-05	0.483429	0.00105107	1	1	0	1	1	1
P04843	0.482732	5.59068e-05	0.35781	0.0295597	1	1	0	1	1	1
P30533	1.01193	2.0917e-22	0.524373	0.000111378	1	1	0	1	1	1
P04920	0.496046	0.00196079	0.379684	0.0367111	1	1	0	1	1	1
Q8TEQ8	0.530103	0.000623917	0.645314	3.97884e-06	1	0	0	1	1	1
Q6ZRP7	0.398837	0.00168879	0.43335	0.0108867	1	1	0	1	1	1
P14625	0.780537	7.82597e-05	0.618277	0.00503413	1	1	0	1	1	1
Q9NPF0	1.06006	3.18861e-19	0.414938	0.0120569	1	0	0	1	1	1
Q9NUN5	0.661649	7.8072e-08	0.455611	0.00212898	1	0	0	1	1	1
P45877	0.444739	0.0452183	0.664171	0.00168111	0	1	0	1	1	1
P08236	0.376511	0.0126626	0.392979	0.0323946	1	1	0	1	1	1
P19022	0.415205	0.00476612	0.715593	1.6044e-06	1	1	0	1	1	1
Q96MM7	1.10443	2.84387e-15	0.85243	2.89128e-07	1	1	0	1	1	1
P10253	0.662689	1.54736e-07	0.733067	5.17841e-07	1	0	0	1	1	1
O94985	0.671393	3.22716e-09	0.711529	2.17003e-08	1	0	0	1	1	1
P55268	0.991079	3.49597e-09	0.995333	2.20291e-09	1	1	0	1	1	1
Q14118	0.474593	7.59269e-05	0.339825	0.0444399	1	1	0	1	1	1
P41440	0.638375	1.49243e-05	0.71229	3.38287e-05	1	1	0	1	1	1
O60279	1.00553	2.11487e-13	0.842226	6.16872e-07	1	1	0	1	1	1
O43505	0.749824	5.85084e-11	0.669189	5.13356e-07	1	1	0	1	1	1
P48509	0.49338	0.00062265	0.417336	0.0114271	1	0	0	1	1	1
P27797	0.825526	4.62311e-08	0.410655	0.0218428	1	1	0	1	1	1
Q4ZIN3	0.670599	7.79777e-05	0.375186	0.00972138	1	1	0	1	1	1
P39060	0.581172	0.000363385	0.637985	0.000390239	1	1	0	1	1	1
Q9BY67	0.605508	9.79055e-05	0.571751	0.00398054	1	1	0	1	1	1
Q96J84	0.702028	3.04231e-06	0.446403	0.0284931	0	0	0	0	1	1
Q6UXH1	0.937443	4.25743e-06	0.455693	0.0263033	1	1	0	1	1	1
P02462	0.573668	0.000276942	0.805836	6.71168e-06	1	1	0	1	1	1
O00468	0.813613	2.49212e-06	0.62549	0.000268386	1	1	0	1	1	1
Q8IWU5	0.708254	2.25244e-06	0.659239	0.000280271	1	1	0	1	1	1
Q9ULF5	0.524844	0.000167119	0.574216	0.00237446	1	1	0	1	1	1
P11717	0.346844	0.00780478	0.776711	9.43434e-10	1	1	0	1	1	1
P07602	1.29551	6.4717e-11	0.538942	0.0190988	1	1	0	1	1	1
P06865	0.339218	0.0376931	0.390225	0.0364199	1	1	0	1	1	1
P39656	1.33558	2.15367e-34	0.432776	0.026222	1	1	0	1	1	1

## Sheet: Newly discovered mRNAs
Ensemble Gene ID	Gene name	Gene type	UniprotID	Log2 (ERM E/I)	P-adj (ERM E/I)	Log2 (Enrich E/N)	P-adj (Enrich E/N)	GOCC secretome	HPA secretome	MitoCarta	Secretome
ENSG00000005007	UPF1	protein_coding	Q92900	0.703564	3.96325e-06	0.550938	0.0178916	0	0	0	0
ENSG00000006118	TMEM132A	protein_coding	Q24JP5	0.993269	7.34847e-08	0.57051	0.00135374	1	0	0	1
ENSG00000007402	CACNA2D2	protein_coding	Q9NY47	0.726135	2.13079e-07	0.584837	0.000938616	1	1	0	1
ENSG00000010292	NCAPD2	protein_coding	Q15021	0.448285	0.000110004	0.491163	0.0012046	1	0	0	1
ENSG00000039068	CDH1	protein_coding	P12830	0.748259	0.00225971	0.604725	0.0347561	1	1	0	1
ENSG00000041982	TNC	protein_coding	P24821	0.853169	0.00234546	1.37944	2.1673e-06	1	1	0	1
ENSG00000052749	RRP12	protein_coding	Q5JTH9	0.352221	0.00572395	1.02023	1.13496e-14	1	0	0	1
ENSG00000062822	POLD1	protein_coding	P28340	0.464544	0.00042436	0.564897	0.000739505	1	0	0	1
ENSG00000064309	CDON	protein_coding	Q4KMG0	0.388591	0.0130716	0.473966	0.0049693	1	1	0	1
ENSG00000065320	NTN1	protein_coding	O95631	0.502612	0.00995373	0.61702	0.0037011	1	1	0	1
ENSG00000072110	ACTN1	protein_coding	P12814	0.377813	0.00102716	0.343678	0.0180344	1	1	0	1
ENSG00000074181	NOTCH3	protein_coding	Q9UM47	0.492733	0.00269439	0.510626	0.00919723	1	1	0	1
ENSG00000075213	SEMA3A	protein_coding	Q14563	0.653866	0.00602464	0.761018	0.0024412	1	1	0	1
ENSG00000076924	XAB2	protein_coding	Q9HCS7	0.407138	0.00437136	0.606354	0.000101968	1	1	0	1
ENSG00000076928	ARHGEF1	protein_coding	Q92888	0.530258	0.00271557	0.500822	0.0149722	1	1	0	1
ENSG00000077942	FBLN1	protein_coding	P23142	1.39163	2.42318e-18	0.483854	0.0078486	1	1	0	1
ENSG00000087303	NID2	protein_coding	Q14112	0.865396	2.42002e-09	0.844455	1.91915e-06	1	1	0	1
ENSG00000089053	ANAPC5	protein_coding	Q9UJX4	0.509459	3.66804e-06	0.310694	0.0424921	0	0	0	0
ENSG00000090861	AARS	protein_coding	P49588	0.483683	0.000260062	0.650334	2.65721e-05	1	0	0	1
ENSG00000090932	DLL3	protein_coding	Q9NYJ7	0.819217	0.00121401	0.907995	0.00136544	1	1	0	1
ENSG00000091129	NRCAM	protein_coding	Q92823	0.841302	7.40277e-06	0.895537	3.94719e-05	1	1	0	1
ENSG00000093009	CDC45	protein_coding	O75419	0.652587	0.000107999	0.422973	0.0299281	0	1	0	1
ENSG00000094914	AAAS	protein_coding	Q9NRG9	0.867397	8.32315e-11	0.41982	0.0136524	1	0	0	1
ENSG00000096384	HSP90AB1	protein_coding	P08238	0.451116	0.000466071	0.487356	0.00310215	1	0	0	1
ENSG00000099139	PCSK5	protein_coding	Q92824	0.880362	7.27859e-07	0.897558	1.68068e-09	1	1	0	1
ENSG00000099250	NRP1	protein_coding	O14786	0.387716	0.00313616	0.832003	7.15803e-09	1	1	0	1
ENSG00000100280	AP1B1	protein_coding	Q10567	0.726211	5.35368e-11	0.349863	0.0406246	1	1	0	1
ENSG00000100297	MCM5	protein_coding	P33992	0.68848	2.01544e-05	0.444475	0.024697	1	0	0	1
ENSG00000100379	KCTD17	protein_coding	Q8N5Z5	0.530786	0.0169209	0.585187	0.0188074	1	0	0	1
ENSG00000100401	RANGAP1	protein_coding	P46060	0.384546	0.00823832	0.42356	0.00823399	0	1	0	1
ENSG00000100726	TELO2	protein_coding	Q9Y4R8	0.321412	0.0405137	0.630301	9.59734e-05	1	0	0	1
ENSG00000101680	LAMA1	protein_coding	P25391	0.339543	0.0345227	1.09266	1.68068e-09	1	1	0	1
ENSG00000102030	NAA10	protein_coding	P41227	0.758832	1.88744e-06	0.618663	0.00155944	1	0	0	1
ENSG00000102755	FLT1	protein_coding	P17948	0.723891	2.01744e-05	0.808782	2.01393e-06	1	1	0	1
ENSG00000103051	COG4	protein_coding	Q9H9E3	0.669948	3.62166e-07	0.579641	0.00290413	1	1	0	1
ENSG00000103197	TSC2	protein_coding	P49815	0.311366	0.0372122	0.423718	0.00126283	1	0	0	1
ENSG00000104691	UBXN8	protein_coding	O00124	1.17173	4.52844e-05	0.605296	0.0264833	1	1	0	1
ENSG00000104998	IL27RA	protein_coding	Q6UWB1	1.20364	7.00578e-09	0.64628	0.00437409	1	0	0	1
ENSG00000105197	TIMM50	protein_coding	Q3ZCQ8	0.452054	0.0210362	0.371847	0.0496851	1	0	1	0
ENSG00000105290	APLP1	protein_coding	P51693	0.644487	0.0025998	0.581983	0.0133221	1	0	0	1
ENSG00000105767	CADM4	protein_coding	Q8NFZ8	0.786056	2.02067e-06	0.381181	0.0401691	1	0	0	1
ENSG00000106009	BRAT1	protein_coding	Q6PJG6	0.596399	5.02269e-06	0.417796	0.00959742	1	0	0	1
ENSG00000106868	SUSD1	protein_coding	Q6UWL2	1.10108	4.50739e-09	0.579003	0.0101788	1	1	0	1
ENSG00000108424	KPNB1	protein_coding	Q14974	0.418901	0.000788896	0.374452	0.0298924	1	0	0	1
ENSG00000108651	UTP6	protein_coding	Q9NYH9	0.329927	0.0017255	0.35855	0.0284076	0	0	0	0
ENSG00000108784	NAGLU	protein_coding	P54802	0.793673	0.000384101	0.6572	0.00482476	1	1	0	1
ENSG00000109458	GAB1	protein_coding	Q13480	0.694931	4.8109e-05	0.462591	0.0472792	0	1	0	1
ENSG00000109586	GALNT7	protein_coding	Q86SF2	0.36338	0.0135235	0.77063	1.82728e-06	1	1	0	1
ENSG00000110013	SIAE	protein_coding	Q9HAT2	0.47187	0.00107431	0.562473	0.000534572	1	1	0	1
ENSG00000112769	LAMA4	protein_coding	Q16363	0.683809	2.471e-07	0.544539	0.000378746	1	1	0	1
ENSG00000114646	CSPG5	protein_coding	O95196	0.766914	4.66667e-06	0.451026	0.0280266	1	0	0	1
ENSG00000115380	EFEMP1	protein_coding	Q12805	0.828361	0.000509204	0.740266	0.00671875	1	1	0	1
ENSG00000115414	FN1	protein_coding	P02751	0.840117	4.96569e-12	1.19889	1.34735e-20	1	1	0	1
ENSG00000115461	IGFBP5	protein_coding	P24593	0.76926	1.01017e-05	0.566152	0.00531443	1	1	0	1
ENSG00000115652	UXS1	protein_coding	Q8NBZ7	0.426039	0.0068078	0.371343	0.0415806	1	1	0	1
ENSG00000116106	EPHA4	protein_coding	P54764	0.937359	7.89062e-20	0.700314	1.78898e-08	1	1	0	1
ENSG00000116117	PARD3B	protein_coding	Q8TEW8	1.17249	3.08107e-07	1.00141	2.63273e-05	0	1	0	1
ENSG00000118257	NRP2	protein_coding	O60462	0.44727	0.00674085	0.92096	2.96909e-07	1	1	0	1
ENSG00000119004	CYP20A1	protein_coding	Q6UW02	0.499541	0.0144869	0.489433	0.0322538	1	1	0	1
ENSG00000119777	TMEM214	protein_coding	Q6NUQ4	0.39324	0.0133854	0.510213	0.000779393	1	1	0	1
ENSG00000120725	SIL1	protein_coding	Q9H173	1.25954	2.11689e-07	0.848755	0.00192506	1	1	0	1
ENSG00000123064	DDX54	protein_coding	Q8TDD1	0.420268	0.00767898	0.491383	0.00578205	1	1	0	1
ENSG00000123146	ADGRE5	protein_coding	#N/A	1.20017	4.25496e-08	0.779864	0.00103114	0	1	0	1
ENSG00000123689	G0S2	protein_coding	P27469	1.15895	0.0282624	1.14906	0.0405453	0	0	0	0
ENSG00000124006	OBSL1	protein_coding	O75147	0.545649	3.31307e-06	0.683364	1.66402e-05	1	0	0	1
ENSG00000124570	SERPINB6	protein_coding	P35237	0.815979	5.55344e-06	0.639637	0.00381795	1	0	0	1
ENSG00000125503	PPP1R12C	protein_coding	Q9BZL4	0.782043	2.23618e-06	0.432693	0.0343703	0	0	0	0
ENSG00000125520	SLC2A4RG	protein_coding	Q9NR83	0.600694	0.0197718	0.688268	0.0222007	0	0	0	0
ENSG00000125931	CITED1	protein_coding	Q99966	0.794393	2.25516e-06	0.415547	0.0458172	0	0	0	0
ENSG00000128567	PODXL	protein_coding	O00592	0.466012	0.0136059	0.704597	0.000202289	1	1	0	1
ENSG00000129347	KRI1	protein_coding	Q8N9T8	0.369707	0.00512302	0.626955	6.49572e-05	0	0	0	0
ENSG00000130714	POMT1	protein_coding	Q9Y6A1	0.386144	0.00329164	0.340543	0.0358549	1	1	0	1
ENSG00000131019	ULBP3	protein_coding	Q9BZM4	0.927148	0.00180403	0.692341	0.0324574	1	1	0	1
ENSG00000132205	EMILIN2	protein_coding	Q9BXX0	0.733225	0.000186911	0.639134	0.00877103	1	1	0	1
ENSG00000132361	CLUH	protein_coding	O75153	0.316298	0.0103747	0.408268	0.00365243	0	1	0	1
ENSG00000132382	MYBBP1A	protein_coding	Q9BQG0	0.349432	0.00562269	0.528958	8.47071e-05	1	1	0	1
ENSG00000132623	ANKEF1	protein_coding	Q9NU02	0.565788	0.00731719	0.523849	0.0244172	0	1	0	1
ENSG00000132768	DPH2	protein_coding	Q9BQC3	0.38364	0.0307236	0.377443	0.040583	0	0	0	0
ENSG00000133313	CNDP2	protein_coding	Q96KP4	0.322466	0.0311136	0.51368	0.00183248	0	0	0	0
ENSG00000133895	MEN1	protein_coding	O00255	0.524155	3.56757e-05	0.56119	0.000150968	1	0	0	1
ENSG00000134013	LOXL2	protein_coding	Q9Y4K0	0.732888	0.000956735	0.768005	0.000372655	1	1	0	1
ENSG00000134107	BHLHE40	protein_coding	O14503	0.621271	6.93902e-05	0.43298	0.0180148	0	0	0	0
ENSG00000134769	DTNA	protein_coding	Q9Y4J8	0.586465	0.000139477	0.441859	0.0154052	0	1	0	1
ENSG00000135525	MAP7	protein_coding	Q14244	0.423845	0.0243123	0.603345	0.00299049	0	0	0	0
ENSG00000135723	FHOD1	protein_coding	Q9Y613	0.685196	9.46702e-08	0.453277	0.00223543	1	0	0	1
ENSG00000136943	CTSV	protein_coding	O60911	0.615414	5.72163e-07	0.678159	5.90101e-06	1	1	0	1
ENSG00000138678	GPAT3	protein_coding	Q53EU6	0.462446	0.00942838	0.741046	2.65721e-05	1	1	0	1
ENSG00000138759	FRAS1	protein_coding	Q86XX4	0.515437	0.00144367	0.62794	0.00016414	1	1	0	1
ENSG00000139182	CLSTN3	protein_coding	Q9BQT9	0.821925	6.29065e-10	0.871501	2.52603e-09	1	1	0	1
ENSG00000139219	COL2A1	protein_coding	P02458	0.865674	2.2071e-08	0.972017	2.52603e-09	1	1	0	1
ENSG00000140092	FBLN5	protein_coding	Q9UBX5	0.878729	1.60577e-06	0.608447	0.00341452	1	1	0	1
ENSG00000142186	SCYL1	protein_coding	Q96KG9	0.335094	0.0208735	0.389668	0.00503413	1	0	0	1
ENSG00000142798	HSPG2	protein_coding	P98160	0.678839	0.00304154	0.780816	0.00104147	1	1	0	1
ENSG00000143153	ATP1B1	protein_coding	P05026	0.40163	0.00211568	0.353121	0.0329832	1	0	0	1
ENSG00000143815	LBR	protein_coding	Q14739	0.376871	0.00053054	0.518089	2.9915e-05	1	0	0	1
ENSG00000144712	CAND2	protein_coding	O75155	0.452122	0.00120943	0.400297	0.0387376	0	0	0	0
ENSG00000145882	PCYOX1L	protein_coding	Q8NBM8	0.67769	8.8411e-08	0.458569	0.00465185	1	1	0	1
ENSG00000146350	TBC1D32	protein_coding	Q96NH3	0.819476	2.22109e-10	0.526211	0.000938832	0	0	0	0
ENSG00000146828	SLC12A9	protein_coding	Q9BXP2	0.414196	0.0363606	0.486458	0.0319607	1	0	0	1
ENSG00000148356	LRSAM1	protein_coding	Q6UWE0	0.543347	0.000831896	0.442201	0.0198707	1	0	0	1
ENSG00000149136	SSRP1	protein_coding	Q08945	0.301914	0.0119635	0.378542	0.00919723	0	0	0	0
ENSG00000149782	PLCB3	protein_coding	Q01970	0.453348	0.00656722	0.455728	0.0186632	1	0	0	1
ENSG00000150471	ADGRL3	protein_coding	Q9HAR2	0.53065	0.0169062	0.680835	0.00582842	1	0	0	1
ENSG00000150893	FREM2	protein_coding	Q5SZK8	0.670153	3.03491e-06	0.92283	3.89867e-08	1	0	0	1
ENSG00000150938	CRIM1	protein_coding	Q9NZV1	0.423654	0.02289	0.883268	1.66382e-06	1	0	0	1
ENSG00000153132	CLGN	protein_coding	O14967	0.398247	0.00173155	0.368077	0.0184383	1	1	0	1
ENSG00000155760	FZD7	protein_coding	O75084	0.877802	4.01959e-06	0.592919	0.017731	1	0	0	1
ENSG00000156140	ADAMTS3	protein_coding	O15072	0.405058	0.0454573	0.651191	0.0019984	1	1	0	1
ENSG00000156675	RAB11FIP1	protein_coding	Q6WKZ4	0.326311	0.0196007	0.412088	0.0361503	0	1	0	1
ENSG00000156697	UTP14A	protein_coding	Q9BVJ6	0.42183	0.00450242	0.444843	0.0447023	0	0	0	0
ENSG00000157514	TSC22D3	protein_coding	Q99576	0.336882	0.0279225	0.403202	0.0147322	0	1	0	1
ENSG00000159640	ACE	protein_coding	P12821	1.1493	0.0409041	1.39937	0.0105314	1	1	0	1
ENSG00000160075	SSU72	protein_coding	Q9NP77	0.554112	3.47142e-05	0.386702	0.0189704	0	0	0	0
ENSG00000160161	CILP2	protein_coding	Q8IUL8	0.920837	7.93244e-05	0.625247	0.0190849	0	1	0	1
ENSG00000160214	RRP1	protein_coding	P56182	0.532381	1.66395e-06	0.35117	0.0173324	0	0	0	0
ENSG00000161940	BCL6B	protein_coding	Q8N143	0.660467	0.0010102	0.457354	0.0468085	0	1	0	1
ENSG00000162407	PLPP3	protein_coding	O14495	0.857508	2.21667e-14	0.662422	2.06613e-06	1	1	0	1
ENSG00000162745	OLFML2B	protein_coding	Q68BL8	1.14229	2.43609e-05	0.654989	0.0379259	1	1	0	1
ENSG00000162769	FLVCR1	protein_coding	Q9Y5Y0	1.14103	9.07244e-14	0.520866	0.00321825	1	1	0	1
ENSG00000163251	FZD5	protein_coding	Q13467	0.684025	0.000724685	0.629945	0.00828884	1	0	0	1
ENSG00000163516	ANKZF1	protein_coding	Q9H8Y5	0.7011	3.40986e-05	0.473589	0.0457493	1	0	0	1
ENSG00000163694	RBM47	protein_coding	A0AV96	0.545895	0.010293	0.492753	0.0499957	0	0	0	0
ENSG00000164176	EDIL3	protein_coding	O43854	0.775909	0.00417359	0.749332	0.0296636	0	1	0	1
ENSG00000164291	ARSK	protein_coding	Q6UWY0	0.996802	9.26342e-10	0.551746	0.000927031	1	1	0	1
ENSG00000164307	ERAP1	protein_coding	Q9NZ08	1.40892	5.83656e-15	1.05026	6.0758e-07	1	1	0	1
ENSG00000164619	BMPER	protein_coding	Q8N8U9	0.833921	0.00263387	0.893748	0.00298222	1	1	0	1
ENSG00000164694	FNDC1	protein_coding	Q4ZHG4	1.12935	3.50581e-06	1.80759	7.46482e-11	1	1	0	1
ENSG00000165194	PCDH19	protein_coding	Q8TAB3	0.700063	0.0024167	0.835522	3.44379e-05	1	0	0	1
ENSG00000165474	GJB2	protein_coding	P29033	0.948986	0.00627066	0.796888	0.0486365	1	0	0	1
ENSG00000166033	HTRA1	protein_coding	Q92743	0.780835	2.41026e-07	0.61645	0.00042364	1	1	0	1
ENSG00000166147	FBN1	protein_coding	P35555	0.644341	2.40814e-05	0.748624	6.51676e-06	1	1	0	1
ENSG00000166508	MCM7	protein_coding	P33993	0.479096	0.00227397	0.574463	0.00102043	1	0	0	1
ENSG00000167378	IRGQ	protein_coding	Q8WZA9	0.471767	0.00281802	0.37592	0.0404021	0	1	0	1
ENSG00000167674	CTB-50L17.10	protein_coding	#N/A	0.443388	7.26991e-05	0.406252	0.0128486	0	0	0	0
ENSG00000167700	MFSD3	protein_coding	Q96ES6	0.453333	0.0100728	0.487209	0.0250575	1	1	0	1
ENSG00000169299	PGM2	protein_coding	Q96G03	0.33211	0.0162859	0.379515	0.04673	1	0	0	1
ENSG00000169371	SNUPN	protein_coding	O95149	0.763623	0.00823832	0.666195	0.034126	0	0	0	0
ENSG00000169515	CCDC8	protein_coding	Q9H0W5	0.638663	0.000107285	0.535397	0.00168048	1	1	0	1
ENSG00000170502	NUDT9	protein_coding	Q9BW91	0.426958	0.00165699	0.407396	0.0184	0	1	1	1
ENSG00000170522	ELOVL6	protein_coding	Q9H5J4	1.1167	3.09688e-17	0.471333	0.00219322	1	0	0	1
ENSG00000170965	PLAC1	protein_coding	Q9HBJ0	0.889751	0.000534638	0.781304	0.00402915	1	1	0	1
ENSG00000171365	CLCN5	protein_coding	P51795	0.39029	0.0258122	0.613027	0.000557666	1	1	0	1
ENSG00000173376	NDNF	protein_coding	Q8TB73	0.852795	3.66804e-06	0.707672	0.000791482	1	1	0	1
ENSG00000173473	SMARCC1	protein_coding	Q92922	0.746727	7.28352e-06	0.547735	0.00705202	0	0	0	0
ENSG00000174106	LEMD3	protein_coding	Q9Y2U8	0.450646	0.00012043	0.333416	0.0475738	1	0	0	1
ENSG00000175467	SART1	protein_coding	O43290	0.87347	6.88718e-09	0.588301	0.000397359	1	1	0	1
ENSG00000177283	FZD8	protein_coding	Q9H461	0.611835	0.000840044	0.788782	1.52611e-06	1	1	0	1
ENSG00000178802	MPI	protein_coding	P34949	0.381556	0.0189235	0.327572	0.0438606	0	1	0	1
ENSG00000179222	MAGED1	protein_coding	Q9Y5V3	0.427287	0.000814691	0.408408	0.00875198	1	0	0	1
ENSG00000179262	RAD23A	protein_coding	P54725	0.431591	0.00026281	0.30802	0.0433822	0	0	0	0
ENSG00000180867	PDIA3P1	processed_pseudogene	#N/A	0.972496	0.000335755	0.859433	0.00236023	0	0	0	0
ENSG00000181104	F2R	protein_coding	P25116	1.19298	3.21711e-10	0.478297	0.0387376	1	1	0	1
ENSG00000181408	UTS2R	protein_coding	Q9UKP6	1.40355	3.07527e-06	1.03221	0.00085496	1	0	0	1
ENSG00000181744	C3orf58	protein_coding	Q8NDZ4	0.522623	0.00471062	0.422048	0.0441927	1	1	0	1
ENSG00000182168	UNC5C	protein_coding	O95185	0.408394	0.0170273	0.676374	0.000152359	1	1	0	1
ENSG00000183098	GPC6	protein_coding	Q9Y625	0.538645	0.00714171	0.940565	3.38287e-05	1	1	0	1
ENSG00000183248	PRR36	protein_coding	#N/A	0.853017	0.00638848	0.620899	0.0410138	0	1	0	1
ENSG00000184432	COPB2	protein_coding	P35606	0.585326	6.22962e-08	1.321	4.53254e-18	1	0	0	1
ENSG00000184967	NOC4L	protein_coding	Q9BVI4	0.496918	0.00330751	0.420985	0.02808	1	0	0	1
ENSG00000185008	ROBO2	protein_coding	Q9HCK4	0.672778	0.000368453	0.756329	0.00021055	1	0	0	1
ENSG00000185164	NOMO2	protein_coding	Q5JPE7	0.903617	2.5174e-06	0.583883	3.38287e-05	1	0	0	1
ENSG00000187676	B3GLCT	protein_coding	Q6Y288	0.668398	0.000200844	0.423149	0.0415806	1	1	0	1
ENSG00000187955	COL14A1	protein_coding	Q05707	0.65339	0.00367742	2.24343	2.18664e-13	1	1	0	1
ENSG00000196700	ZNF512B	protein_coding	Q96KM6	0.336072	0.043691	0.451446	0.0197106	0	0	0	0
ENSG00000197324	LRP10	protein_coding	Q7Z4F1	0.389026	0.00989896	0.564909	0.000664298	1	0	0	1
ENSG00000197565	COL4A6	protein_coding	Q14031	0.684624	0.000244545	0.965106	8.17979e-07	1	1	0	1
ENSG00000198231	DDX42	protein_coding	Q86XP3	0.426902	0.0211483	0.439268	0.0345215	1	0	0	1
ENSG00000198732	SMOC1	protein_coding	Q9H4F8	0.711352	2.06241e-05	0.577788	0.000597487	0	1	0	1
ENSG00000203914	HSP90B3P	processed_pseudogene	#N/A	1.1138	2.0974e-08	0.712937	0.000961664	0	0	0	0
ENSG00000213339	QTRT1	protein_coding	Q9BXR0	0.390364	0.00962588	0.393315	0.0343703	0	0	1	0
ENSG00000214223	HNRNPA1P10	processed_pseudogene	#N/A	1.16792	1.06777e-07	0.593889	0.019159	0	0	0	0
ENSG00000214455	RCN1P2	processed_pseudogene	#N/A	0.663955	0.0231137	0.643995	0.0179993	0	0	0	0
ENSG00000215477	RCN1P1	processed_pseudogene	#N/A	1.21842	0.0089158	1.36699	0.00441518	0	0	0	0
ENSG00000228360	RP11-365F18.1	processed_pseudogene	#N/A	1.75871	1.14088e-09	0.677643	0.0338671	0	0	0	0
ENSG00000232048	HNRNPCP9	processed_pseudogene	#N/A	1.82527	0.0323874	2.41105	0.00784844	0	0	0	0
ENSG00000232499	RP11-512F24.1	processed_pseudogene	#N/A	2.27587	3.01737e-19	0.563154	0.0324574	0	0	0	0
ENSG00000236015	AC011290.5	processed_pseudogene	#N/A	0.749737	0.00998271	0.702279	0.0379227	0	0	0	0
ENSG00000240184	PCDHGC3	protein_coding	Q9UN70	0.665787	0.00953539	0.761577	0.00808335	1	1	0	1
ENSG00000240857	RDH14	protein_coding	Q9HBH5	0.833067	4.05231e-06	0.420338	0.0416083	1	0	1	0
ENSG00000242162	RP11-128A6.3	processed_pseudogene	#N/A	1.51452	2.99869e-05	0.944207	0.0466107	0	0	0	0
ENSG00000242173	ARHGDIG	protein_coding	Q99819	1.03533	0.00026651	0.83189	0.00600403	1	1	0	1
ENSG00000242419	PCDHGC4	protein_coding	Q9Y5F7	1.1467	0.000458112	0.757957	0.0450862	1	1	0	1
ENSG00000251593	MSNP1	processed_pseudogene	#N/A	0.572897	0.0320001	1.52663	2.52446e-07	0	0	0	0
ENSG00000253873	PCDHGA11	protein_coding	Q9Y5H2	0.691738	0.0147732	0.727887	0.0231763	1	1	0	1
ENSG00000254986	DPP3	protein_coding	Q9NY33	0.628678	5.11313e-05	0.433201	0.0159802	1	1	0	1
ENSG00000256269	HMBS	protein_coding	P08397	0.784424	9.53124e-07	0.405836	0.0356573	0	1	1	1
ENSG00000259051	HNRNPUP1	processed_pseudogene	#N/A	0.603828	5.03026e-06	1.15201	1.4458e-12	0	0	0	0
ENSG00000260290	CTD-2033A16.2	processed_pseudogene	#N/A	0.787449	1.27326e-06	0.775634	1.93171e-06	0	0	0	0
ENSG00000262655	SPON1	protein_coding	Q9HCB6	0.725504	3.16952e-05	0.795375	4.58107e-05	1	1	0	1
ENSG00000276043	UHRF1	protein_coding	Q96T88	0.437054	0.0050653	0.720584	0.00146518	0	0	0	0

## Sheet: Counts data
			ERM Enrich Counts			ERM Input Counts			NES Enrich Counts
Ensemble Gene ID	Gene name	Gene type	Replicate 1	Replicate 2	Replicate 3	Replicate 1	Replicate 2	Replicate 3	Replicate 1	Replicate 2	Replicate 3
ENSG00000000003	TSPAN6	protein_coding	2593	1678	4275	2709	3269	2687	2172	2797	3932
ENSG00000000005	TNMD	protein_coding	13	20	22	10	12	6	4	10	8
ENSG00000000419	DPM1	protein_coding	1976	2130	3303	2600	3045	2656	2022	2858	3893
ENSG00000000457	SCYL3	protein_coding	275	254	469	318	376	339	267	359	468
ENSG00000000460	C1orf112	protein_coding	1595	1179	2233	1492	1795	1420	904	1186	1789
ENSG00000000938	FGR	protein_coding	0	8	0	0	0	0	0	3	0
ENSG00000000971	CFH	protein_coding	10	5	19	6	8	5	7	8	8
ENSG00000001036	FUCA2	protein_coding	1113	907	1624	1121	1305	1085	631	856	1274
ENSG00000001084	GCLC	protein_coding	542	490	872	830	843	652	515	599	901
ENSG00000001167	NFYA	protein_coding	498	396	662	612	749	577	566	709	999
ENSG00000001460	STPG1	protein_coding	208	110	402	325	422	340	259	301	437
ENSG00000001461	NIPAL3	protein_coding	352	244	598	399	392	238	475	551	793
ENSG00000001497	LAS1L	protein_coding	3922	3585	5987	4516	5166	4042	3289	4137	5953
ENSG00000001561	ENPP4	protein_coding	605	264	925	603	839	698	463	563	859
ENSG00000001617	SEMA3F	protein_coding	112	82	183	130	118	102	109	93	203
ENSG00000001626	CFTR	protein_coding	0	0	0	0	3	0	0	0	0
ENSG00000001629	ANKIB1	protein_coding	218	185	372	334	301	300	247	317	665
ENSG00000001630	CYP51A1	protein_coding	161	220	175	93	75	77	120	135	187
ENSG00000001631	KRIT1	protein_coding	297	229	635	497	590	517	199	250	392
ENSG00000002016	RAD52	protein_coding	348	286	541	581	645	509	269	364	608
ENSG00000002079	MYH16	unitary_pseudogene	15	16	13	18	15	14	20	13	28
ENSG00000002330	BAD	protein_coding	170	142	258	122	169	130	149	246	342
ENSG00000002549	LAP3	protein_coding	2156	1906	3491	2178	2528	1937	1750	2077	3115
ENSG00000002586	CD99	protein_coding	1885	1474	2645	1331	1456	1151	1635	2105	2926
ENSG00000002587	HS3ST1	protein_coding	0	0	4	0	0	0	0	0	0
ENSG00000002726	AOC1	protein_coding	0	0	0	0	0	0	0	0	1
ENSG00000002745	WNT16	protein_coding	1	2	2	3	2	2	2	3	2
ENSG00000002746	HECW1	protein_coding	6	3	13	9	5	18	10	3	8
ENSG00000002822	MAD1L1	protein_coding	1008	756	1443	909	955	720	696	848	1351
ENSG00000002834	LASP1	protein_coding	642	539	1012	681	763	576	811	905	1242
ENSG00000002919	SNX11	protein_coding	376	276	605	404	478	279	399	465	695
ENSG00000002933	TMEM176A	protein_coding	0	0	0	0	0	0	0	0	0
ENSG00000003056	M6PR	protein_coding	2622	1163	4073	1951	2047	1790	2499	3426	4638
ENSG00000003096	KLHL13	protein_coding	690	478	1060	772	899	735	520	612	919
ENSG00000003137	CYP26B1	protein_coding	92	44	128	67	76	50	83	59	128
ENSG00000003147	ICA1	protein_coding	82	70	132	99	132	92	71	66	154
ENSG00000003249	DBNDD1	protein_coding	93	85	172	163	155	142	94	123	191
ENSG00000003393	ALS2	protein_coding	433	333	696	660	770	602	369	489	789
ENSG00000003400	CASP10	protein_coding	140	81	176	156	190	124	163	171	223
ENSG00000003402	CFLAR	protein_coding	244	193	444	301	296	219	236	315	443
ENSG00000003436	TFPI	protein_coding	177	98	213	161	173	135	86	92	157
ENSG00000003509	NDUFAF7	protein_coding	272	242	432	349	389	346	306	349	468
ENSG00000003756	RBM5	protein_coding	1120	836	1681	1610	1724	1524	904	803	1583
ENSG00000003987	MTMR7	protein_coding	56	69	124	58	75	57	81	109	142
ENSG00000003989	SLC7A2	protein_coding	835	653	1460	823	1011	699	537	694	957
ENSG00000004059	ARF5	protein_coding	4640	3033	6804	4238	5092	3422	4483	6422	9290
ENSG00000004139	SARM1	protein_coding	298	316	453	188	216	150	218	242	425
ENSG00000004142	POLDIP2	protein_coding	1765	1520	2912	1745	2271	1735	1615	2301	3142
ENSG00000004399	PLXND1	protein_coding	114	127	189	149	167	141	100	123	211
ENSG00000004455	AK2	protein_coding	1808	1332	2993	2031	2097	1743	1702	2182	3306
ENSG00000004468	CD38	protein_coding	0	0	0	3	1	3	2	1	1
ENSG00000004478	FKBP4	protein_coding	6542	5369	9888	6435	7052	5259	5616	6820	10078
ENSG00000004487	KDM1A	protein_coding	4829	4421	7382	5631	6509	5000	4099	5029	7130
ENSG00000004534	RBM6	protein_coding	1250	1001	2263	1902	2291	1865	1058	1248	2235
ENSG00000004660	CAMKK1	protein_coding	273	214	435	262	431	307	253	314	506
ENSG00000004700	RECQL	protein_coding	1188	897	2059	2051	2160	1946	898	982	1577
ENSG00000004766	VPS50	protein_coding	799	416	1237	944	1163	931	799	842	1152
ENSG00000004776	HSPB6	protein_coding	13	14	11	22	26	8	11	12	22
ENSG00000004777	ARHGAP33	protein_coding	38	24	65	48	30	23	22	41	43
ENSG00000004779	NDUFAB1	protein_coding	9476	4118	14351	8614	9172	7477	10853	14985	19545
ENSG00000004799	PDK4	protein_coding	27	29	37	42	45	48	17	45	42
ENSG00000004809	SLC22A16	protein_coding	0	2	0	0	1	0	0	3	0
ENSG00000004838	ZMYND10	protein_coding	8	17	14	34	26	20	9	20	30
ENSG00000004846	ABCB5	protein_coding	1	1	1	1	0	0	2	0	0
ENSG00000004848	ARX	protein_coding	1	1	2	0	1	0	0	0	2
ENSG00000004864	SLC25A13	protein_coding	3547	2675	5553	3915	4479	3666	2447	3122	4235
ENSG00000004866	ST7	protein_coding	169	112	265	180	190	130	137	199	273
ENSG00000004897	CDC27	protein_coding	1075	406	1887	1440	1636	1262	947	1179	1814
ENSG00000004939	SLC4A1	protein_coding	1	0	1	2	4	2	2	3	2
ENSG00000004948	CALCR	protein_coding	0	2	0	1	0	0	0	6	0
ENSG00000004961	HCCS	protein_coding	966	652	1421	1016	1023	853	987	1286	1567
ENSG00000004975	DVL2	protein_coding	1133	841	1791	1267	1313	1159	791	1026	1448
ENSG00000005001	PRSS22	protein_coding	0	0	0	0	0	0	0	0	0
ENSG00000005007	UPF1	protein_coding	8621	7478	12105	6533	7464	4798	6692	5831	8722
ENSG00000005020	SKAP2	protein_coding	1109	1018	1570	964	1073	930	752	1083	1478
ENSG00000005022	SLC25A5	protein_coding	14185	6150	21168	12778	14525	12013	15411	21337	26542
ENSG00000005059	MCUB	protein_coding	295	258	554	209	266	221	226	354	579
ENSG00000005073	HOXA11	protein_coding	306	283	473	469	529	411	329	377	565
ENSG00000005075	POLR2J	protein_coding	64	99	93	70	125	74	83	118	160
ENSG00000005100	DHX33	protein_coding	1631	1288	2475	1851	1931	1731	1656	2250	3291
ENSG00000005102	MEOX1	protein_coding	8	18	14	17	20	10	11	11	33
ENSG00000005108	THSD7A	protein_coding	11	7	17	8	17	18	8	9	13
ENSG00000005156	LIG3	protein_coding	1229	892	2142	1320	1585	1094	880	914	1351
ENSG00000005175	RPAP3	protein_coding	2129	2277	3469	3022	3572	3193	1981	2361	3586
ENSG00000005187	ACSM3	protein_coding	29	14	25	30	36	17	13	32	49
ENSG00000005189	AC004381.6	protein_coding	407	300	615	516	573	469	362	434	700
ENSG00000005194	CIAPIN1	protein_coding	1480	1395	2518	1623	1716	1543	1202	1637	2429
ENSG00000005206	SPPL2B	protein_coding	173	195	273	205	237	160	180	180	347
ENSG00000005238	FAM214B	protein_coding	23	9	36	23	27	23	17	34	49
ENSG00000005243	COPZ2	protein_coding	8	5	8	3	12	13	6	8	16
ENSG00000005249	PRKAR2B	protein_coding	331	257	559	354	472	381	251	332	436
ENSG00000005302	MSL3	protein_coding	534	584	797	658	774	485	639	782	1099
ENSG00000005339	CREBBP	protein_coding	3058	2636	4307	4204	4309	3311	2886	3816	5702
ENSG00000005379	TSPOAP1	protein_coding	1	4	1	1	7	3	0	2	0
ENSG00000005381	MPO	protein_coding	0	0	0	0	0	0	0	0	0
ENSG00000005421	PON1	protein_coding	0	0	0	0	0	1	0	4	0
ENSG00000005436	GCFC2	protein_coding	654	646	1083	839	996	1045	571	752	1085
ENSG00000005448	WDR54	protein_coding	447	337	745	426	444	372	375	473	712
ENSG00000005469	CROT	protein_coding	278	161	410	262	296	269	177	202	280
ENSG00000005471	ABCB4	protein_coding	19	17	46	26	35	31	18	21	38
ENSG00000005483	KMT2E	protein_coding	359	331	634	646	790	622	429	478	900
ENSG00000005486	RHBDD2	protein_coding	216	138	314	208	231	162	183	293	442
ENSG00000005513	SOX8	protein_coding	35	26	61	40	45	54	44	42	64
ENSG00000005700	IBTK	protein_coding	1	0	3	8	7	4	3	3	4
ENSG00000005801	ZNF195	protein_coding	627	508	1099	769	854	674	741	959	1496
ENSG00000005810	MYCBP2	protein_coding	1981	2205	3254	3253	3824	3215	1638	1827	3754
ENSG00000005812	FBXL3	protein_coding	788	988	1464	1159	1649	1351	827	1086	1709
ENSG00000005844	ITGAL	protein_coding	5	3	10	5	8	2	1	2	4
ENSG00000005882	PDK2	protein_coding	290	191	382	200	328	231	191	281	379
ENSG00000005884	ITGA3	protein_coding	152	124	260	130	146	124	112	104	183
ENSG00000005889	ZFX	protein_coding	1347	879	1965	1748	2082	1700	1280	1602	2329
ENSG00000005893	LAMP2	protein_coding	8704	3604	12924	8401	9797	7126	6476	8559	11576
ENSG00000005961	ITGA2B	protein_coding	43	62	86	63	69	62	40	70	88
ENSG00000005981	ASB4	protein_coding	0	0	0	0	0	0	0	0	0
ENSG00000006007	GDE1	protein_coding	731	545	1058	638	776	601	599	869	1307
ENSG00000006015	C19orf60	protein_coding	127	119	148	104	120	89	112	172	271
ENSG00000006016	CRLF1	protein_coding	13	19	27	19	12	9	17	12	41
ENSG00000006025	OSBPL7	protein_coding	25	23	49	41	42	22	19	17	55
ENSG00000006042	TMEM98	protein_coding	497	412	905	449	551	372	422	677	813
ENSG00000006047	YBX2	protein_coding	11	7	27	12	20	10	18	14	19
ENSG00000006059	KRT33A	protein_coding	0	0	0	0	0	0	0	0	0
ENSG00000006062	MAP3K14	protein_coding	143	133	220	158	186	174	85	109	200
ENSG00000006071	ABCC8	protein_coding	38	18	29	36	51	36	24	35	77
ENSG00000006116	CACNG3	protein_coding	0	0	0	0	0	0	0	0	0
ENSG00000006118	TMEM132A	protein_coding	517	393	798	245	390	271	291	423	574
ENSG00000006125	AP2B1	protein_coding	4879	3085	7463	5070	5945	4634	4086	4830	6610
ENSG00000006128	TAC1	protein_coding	19	18	59	36	28	28	26	27	51
ENSG00000006194	ZNF263	protein_coding	296	202	369	410	452	266	259	341	602
ENSG00000006210	CX3CL1	protein_coding	0	0	3	4	0	1	0	0	0
ENSG00000006282	SPATA20	protein_coding	134	100	231	129	143	137	132	138	221
ENSG00000006283	CACNA1G	protein_coding	12	16	33	25	30	16	20	30	59
ENSG00000006327	TNFRSF12A	protein_coding	302	176	392	168	198	122	191	285	422
ENSG00000006377	DLX6	protein_coding	65	47	111	77	76	67	62	71	124
ENSG00000006432	MAP3K9	protein_coding	163	138	224	284	317	214	124	151	323
ENSG00000006451	RALA	protein_coding	679	666	1052	861	1070	732	632	843	1220
ENSG00000006453	BAIAP2L1	protein_coding	7336	5212	12632	8808	10139	8679	7730	8875	12852
ENSG00000006459	KDM7A	protein_coding	624	515	984	834	872	620	544	645	991
ENSG00000006468	ETV1	protein_coding	38	26	66	36	34	34	43	37	44
ENSG00000006530	AGK	protein_coding	571	452	1003	696	737	576	438	532	750
ENSG00000006534	ALDH3B1	protein_coding	7	11	18	18	11	14	9	13	23
ENSG00000006555	TTC22	protein_coding	1	0	0	0	0	1	0	0	0
ENSG00000006576	PHTF2	protein_coding	315	237	579	513	657	552	367	376	639
ENSG00000006606	CCL26	protein_coding	0	0	1	0	2	0	0	0	0
ENSG00000006607	FARP2	protein_coding	1002	752	1539	1342	1442	1206	882	1027	1534
ENSG00000006611	USH1C	protein_coding	60	36	69	46	33	27	38	70	84
ENSG00000006625	GGCT	protein_coding	743	574	1280	1018	1072	749	865	999	1304
ENSG00000006634	DBF4	protein_coding	618	380	916	608	776	606	744	942	1146
ENSG00000006638	TBXA2R	protein_coding	6	7	21	10	10	4	6	12	14
ENSG00000006652	IFRD1	protein_coding	578	514	927	948	1060	839	470	604	1255
ENSG00000006659	LGALS14	protein_coding	0	0	0	0	0	0	0	0	0
ENSG00000006695	COX10	protein_coding	155	97	238	272	264	235	168	217	331
ENSG00000006704	GTF2IRD1	protein_coding	307	257	504	299	395	267	306	336	514
ENSG00000006712	PAF1	protein_coding	2329	2412	3525	2866	3141	2337	1955	2328	3509
ENSG00000006715	VPS41	protein_coding	1108	993	1545	1308	1489	1286	914	994	1644
ENSG00000006740	ARHGAP44	protein_coding	66	41	118	100	117	87	46	75	131
ENSG00000006744	ELAC2	protein_coding	1690	1178	2788	2275	2454	1944	1344	1801	2804
ENSG00000006747	SCIN	protein_coding	13	18	32	21	18	27	17	20	51
ENSG00000006756	ARSD	protein_coding	0	0	1	2	0	0	0	0	3
ENSG00000006757	PNPLA4	protein_coding	69	33	72	27	40	36	46	74	90
ENSG00000006788	MYH13	protein_coding	0	1	0	1	1	2	0	1	1
ENSG00000006831	ADIPOR2	protein_coding	1577	1119	2239	1384	1607	1036	1733	2332	2824
ENSG00000006837	CDKL3	protein_coding	58	10	75	47	59	32	50	53	90
ENSG00000007001	UPP2	protein_coding	0	0	0	0	0	0	0	0	0
ENSG00000007038	PRSS21	protein_coding	0	0	0	0	0	0	0	0	0
ENSG00000007047	MARK4	protein_coding	171	196	327	223	221	163	156	196	331
ENSG00000007062	PROM1	protein_coding	0	0	0	3	0	1	0	0	3
ENSG00000007080	CCDC124	protein_coding	1814	1788	2699	1267	1469	1066	1761	2284	2999
ENSG00000007129	CEACAM21	protein_coding	0	0	0	0	0	0	0	0	0
ENSG00000007168	PAFAH1B1	protein_coding	1612	1367	2761	2465	2992	2498	1456	1880	2580
ENSG00000007171	NOS2	protein_coding	26	22	33	27	45	26	12	21	41
ENSG00000007174	DNAH9	protein_coding	0	0	3	3	0	0	0	1	1
ENSG00000007202	KIAA0100	protein_coding	1171	1589	1764	1668	1806	1355	1160	1365	2746
ENSG00000007216	SLC13A2	protein_coding	0	2	1	0	0	0	0	0	0
ENSG00000007237	GAS7	protein_coding	36	19	67	29	38	48	33	40	82
ENSG00000007255	TRAPPC6A	protein_coding	160	157	223	138	120	91	139	152	266
ENSG00000007264	MATK	protein_coding	137	115	256	163	188	129	116	119	270
ENSG00000007306	CEACAM7	protein_coding	0	0	0	0	0	0	0	0	0
ENSG00000007312	CD79B	protein_coding	0	3	0	0	3	1	0	1	2
ENSG00000007314	SCN4A	protein_coding	21	12	25	33	32	22	19	31	33
ENSG00000007341	ST7L	protein_coding	339	264	599	369	482	433	326	432	636
ENSG00000007350	TKTL1	protein_coding	7	3	14	7	6	6	8	15	9
ENSG00000007372	PAX6	protein_coding	479	364	884	604	664	544	530	649	912
ENSG00000007376	RPUSD1	protein_coding	829	637	1308	704	801	648	798	936	1413
ENSG00000007384	RHBDF1	protein_coding	85	53	141	102	99	84	81	99	164
ENSG00000007392	LUC7L	protein_coding	1828	1507	2498	1515	1644	1259	1872	2745	3590
ENSG00000007402	CACNA2D2	protein_coding	665	506	976	481	495	396	415	499	673
ENSG00000007516	BAIAP3	protein_coding	26	14	42	41	55	46	32	19	53
ENSG00000007520	TSR3	protein_coding	356	287	525	277	223	181	289	295	530
ENSG00000007541	PIGQ	protein_coding	168	172	279	215	233	185	127	133	253
ENSG00000007545	CRAMP1	protein_coding	85	107	153	172	160	132	82	101	175
ENSG00000007866	TEAD3	protein_coding	117	79	208	153	170	111	111	135	226
ENSG00000007908	SELE	protein_coding	0	0	0	0	0	0	0	0	3
ENSG00000007923	DNAJC11	protein_coding	4086	2788	6611	3808	4281	3184	3506	4630	6257
ENSG00000007933	FMO3	protein_coding	0	0	4	0	2	0	0	1	1
ENSG00000007944	MYLIP	protein_coding	178	137	225	253	209	212	168	200	368
ENSG00000007952	NOX1	protein_coding	0	0	2	3	2	1	1	1	0
ENSG00000007968	E2F2	protein_coding	0	0	0	0	0	1	0	0	0
ENSG00000008018	PSMB1	protein_coding	28284	28734	56426	24597	33114	29198	33176	49466	62044
ENSG00000008056	SYN1	protein_coding	77	44	75	49	64	42	39	39	71
ENSG00000008083	JARID2	protein_coding	657	656	1021	896	880	726	545	562	861
ENSG00000008086	CDKL5	protein_coding	57	40	139	97	107	88	71	78	116
ENSG00000008118	CAMK1G	protein_coding	0	3	0	1	0	0	0	0	0
ENSG00000008128	CDK11A	protein_coding	14	2	20	13	9	12	4	10	27
ENSG00000008130	NADK	protein_coding	405	413	867	584	690	470	379	519	856
ENSG00000008196	TFAP2B	protein_coding	0	1	0	0	1	0	0	0	0
ENSG00000008197	TFAP2D	protein_coding	0	0	0	0	0	0	0	0	0
ENSG00000008226	DLEC1	protein_coding	8	15	6	9	9	6	7	10	6
ENSG00000008256	CYTH3	protein_coding	255	150	441	450	456	298	273	295	579
ENSG00000008277	ADAM22	protein_coding	231	155	320	231	324	172	151	185	226
ENSG00000008282	SYPL1	protein_coding	1583	853	2614	1319	1633	1314	1107	1600	2139
ENSG00000008283	CYB561	protein_coding	107	85	193	130	117	97	105	118	192
ENSG00000008294	SPAG9	protein_coding	3152	3385	4774	4049	4521	3671	2737	3553	5303
ENSG00000008300	CELSR3	protein_coding	728	750	1148	1147	1019	881	592	645	1312
ENSG00000008311	AASS	protein_coding	549	477	923	694	899	703	319	462	642
ENSG00000008323	PLEKHG6	protein_coding	1	0	2	7	1	1	3	0	2
ENSG00000008324	SS18L2	protein_coding	447	289	698	428	431	285	444	500	728
ENSG00000008382	MPND	protein_coding	105	118	156	127	140	103	81	119	183
ENSG00000008394	MGST1	protein_coding	1659	1199	2522	1812	2151	1843	1606	2049	2762
ENSG00000008405	CRY1	protein_coding	741	465	1083	898	997	852	503	698	958
ENSG00000008438	PGLYRP1	protein_coding	1	0	3	4	5	3	4	9	1
ENSG00000008441	NFIX	protein_coding	215	293	393	417	356	286	230	253	481
ENSG00000008513	ST3GAL1	protein_coding	34	32	80	45	48	47	35	50	63
ENSG00000008516	MMP25	protein_coding	8	6	8	9	11	6	12	9	8
ENSG00000008517	IL32	protein_coding	7	7	20	11	12	15	12	20	20
ENSG00000008710	PKD1	protein_coding	255	285	533	423	550	417	275	286	720
ENSG00000008735	MAPK8IP2	protein_coding	860	963	1238	931	991	728	747	766	1137
ENSG00000008838	MED24	protein_coding	1858	1423	3026	1935	2182	1636	1312	1724	2373
ENSG00000008853	RHOBTB2	protein_coding	76	99	158	119	129	97	106	94	184
ENSG00000008869	HEATR5B	protein_coding	1725	1278	2537	2099	2294	1917	1009	1087	1537
ENSG00000008952	SEC62	protein_coding	2961	4471	4685	3282	3864	2998	3113	3941	5738
ENSG00000008988	RPS20	protein_coding	4804	2829	8111	5757	5111	4440	4718	7472	10933
ENSG00000009307	CSDE1	protein_coding	19212	14794	32831	21182	25230	22350	14973	18093	28816
ENSG00000009335	UBE3C	protein_coding	1245	1265	2120	1832	2229	1901	1236	1379	2636
ENSG00000009413	REV3L	protein_coding	531	370	1140	1000	1136	993	851	1056	1928
ENSG00000009694	TENM1	protein_coding	56	49	135	152	132	158	67	46	145
ENSG00000009709	PAX7	protein_coding	8	11	5	7	18	12	8	6	19
ENSG00000009724	MASP2	protein_coding	14	11	27	26	40	32	15	12	34
ENSG00000009765	IYD	protein_coding	0	0	0	0	0	0	0	0	0
ENSG00000009780	FAM76A	protein_coding	409	400	576	350	415	333	372	461	744
ENSG00000009790	TRAF3IP3	protein_coding	1	5	1	6	5	0	4	0	5
ENSG00000009830	POMT2	protein_coding	328	255	470	384	388	337	219	290	448
ENSG00000009844	VTA1	protein_coding	2181	1426	3110	2439	2707	2139	2433	3128	4131
ENSG00000009950	MLXIPL	protein_coding	87	41	128	152	152	101	72	74	145
ENSG00000009954	BAZ1B	protein_coding	7959	6974	12474	8526	9341	7847	5840	5870	9494
ENSG00000010017	RANBP9	protein_coding	1603	950	2283	1622	1893	1502	1314	1880	2317
ENSG00000010030	ETV7	protein_coding	0	0	2	4	1	3	0	1	0
ENSG00000010072	SPRTN	protein_coding	1155	754	1808	1445	1753	1457	1288	1696	2387
ENSG00000010165	METTL13	protein_coding	1030	916	1583	990	1137	910	963	1088	1593
ENSG00000010219	DYRK4	protein_coding	120	67	176	169	195	152	103	133	195
ENSG00000010244	ZNF207	protein_coding	812	407	1170	871	991	829	654	852	1288
ENSG00000010256	UQCRC1	protein_coding	7150	6924	11297	7286	8532	6557	6187	7711	10690
ENSG00000010270	STARD3NL	protein_coding	769	532	1187	741	811	666	575	698	1169
ENSG00000010278	CD9	protein_coding	1860	1245	2884	1348	1452	1165	1785	2271	3221
ENSG00000010282	HHATL	protein_coding	1	3	3	2	1	3	4	3	7
ENSG00000010292	NCAPD2	protein_coding	6342	4801	9278	5393	6031	4450	4246	4973	6857
ENSG00000010295	IFFO1	protein_coding	596	480	955	606	641	448	603	637	1223
ENSG00000010310	GIPR	protein_coding	33	17	37	13	21	10	27	44	44
ENSG00000010318	PHF7	protein_coding	55	40	89	87	94	55	90	90	124
ENSG00000010319	SEMA3G	protein_coding	46	46	104	54	69	51	65	87	141
ENSG00000010322	NISCH	protein_coding	1199	935	1716	1551	1869	1291	1014	1275	2228
ENSG00000010327	STAB1	protein_coding	5	6	1	5	4	1	3	5	3
ENSG00000010361	FUZ	protein_coding	584	607	1055	795	866	724	586	776	1117
ENSG00000010379	SLC6A13	protein_coding	11	12	38	36	28	15	7	29	41
ENSG00000010404	IDS	protein_coding	62	51	123	216	195	159	108	131	192
ENSG00000010438	PRSS3	protein_coding	0	0	0	1	1	0	1	4	1
ENSG00000010539	ZNF200	protein_coding	947	983	1661	966	1029	907	1182	1517	2299
ENSG00000010610	CD4	protein_coding	0	0	18	5	17	9	7	5	5
ENSG00000010626	LRRC23	protein_coding	56	31	91	89	95	87	54	65	121
ENSG00000010671	BTK	protein_coding	10	4	13	11	18	11	14	19	33
ENSG00000010704	HFE	protein_coding	2	0	0	3	5	0	0	3	2
ENSG00000010803	SCMH1	protein_coding	225	169	424	470	456	372	193	241	429
ENSG00000010810	FYN	protein_coding	1950	1553	2926	2309	2574	1976	1635	2131	3067
ENSG00000010818	HIVEP2	protein_coding	200	170	353	325	373	331	239	243	459
ENSG00000010932	FMO1	protein_coding	0	1	0	0	0	1	0	1	0
ENSG00000011007	TCEB3	protein_coding	974	814	1604	1100	1228	1026	810	809	1283
ENSG00000011009	LYPLA2	protein_coding	239	165	330	163	181	125	186	217	333
ENSG00000011021	CLCN6	protein_coding	303	280	474	378	445	291	341	367	611
ENSG00000011028	MRC2	protein_coding	236	220	424	238	281	218	168	216	364
ENSG00000011052	NME1-NME2	protein_coding	0	0	0	0	0	0	0	0	0
ENSG00000011083	SLC6A7	protein_coding	0	0	0	0	0	0	0	0	0
ENSG00000011105	TSPAN9	protein_coding	242	177	346	220	190	204	181	223	270
ENSG00000011114	BTBD7	protein_coding	2	4	0	0	0	1	0	2	2
ENSG00000011132	APBA3	protein_coding	155	107	252	174	206	177	133	148	298
ENSG00000011143	MKS1	protein_coding	460	518	700	537	640	495	407	431	671
ENSG00000011198	ABHD5	protein_coding	463	329	691	520	580	485	444	511	775
ENSG00000011201	ANOS1	protein_coding	0	1	2	0	0	3	1	2	3
ENSG00000011243	AKAP8L	protein_coding	1652	1397	2821	1434	1726	1483	1831	2091	3857
ENSG00000011258	MBTD1	protein_coding	248	250	472	502	584	503	287	362	632
ENSG00000011260	UTP18	protein_coding	2209	2107	3672	3074	3792	3046	1441	1400	2508
ENSG00000011275	RNF216	protein_coding	1275	1039	2115	1404	1810	1391	1167	1443	2392
ENSG00000011295	TTC19	protein_coding	465	363	783	592	765	582	478	550	921
ENSG00000011304	PTBP1	protein_coding	6724	4026	11070	7133	7795	5954	5222	5451	8709
ENSG00000011332	DPF1	protein_coding	252	227	407	245	220	161	261	325	398
ENSG00000011347	SYT7	protein_coding	45	47	85	83	84	55	59	52	102
ENSG00000011376	LARS2	protein_coding	1114	922	1787	1715	2012	1597	798	1041	1495
ENSG00000011405	PIK3C2A	protein_coding	1347	1044	2291	2676	3041	2794	1367	1542	2655
ENSG00000011422	PLAUR	protein_coding	149	161	270	160	185	129	145	191	269
ENSG00000011426	ANLN	protein_coding	2606	2465	4112	3260	3932	3254	2194	1987	3630
ENSG00000011451	WIZ	protein_coding	572	488	891	589	688	459	376	513	768
ENSG00000011454	RABGAP1	protein_coding	1243	1088	1882	1753	2002	1504	1174	1364	2126
ENSG00000011465	DCN	protein_coding	2	2	3	0	1	3	3	3	5
ENSG00000011478	QPCTL	protein_coding	365	337	623	347	370	260	313	430	640
ENSG00000011485	PPP5C	protein_coding	2065	1657	3152	2139	2373	1978	1696	1937	3552
ENSG00000011523	CEP68	protein_coding	287	277	524	363	385	308	335	445	555
ENSG00000011566	MAP4K3	protein_coding	356	246	681	529	653	600	347	443	733
ENSG00000011590	ZBTB32	protein_coding	1	3	8	4	1	3	3	9	6
ENSG00000011600	TYROBP	protein_coding	0	0	0	0	1	0	0	0	0
ENSG00000011638	TMEM159	protein_coding	111	68	187	132	150	105	141	128	208
ENSG00000011677	GABRA3	protein_coding	0	0	0	0	0	1	0	0	1
ENSG00000012048	BRCA1	protein_coding	1713	1303	2837	2308	2579	2322	1375	1425	2306
ENSG00000012061	ERCC1	protein_coding	1338	662	2077	1046	1027	817	1271	1842	2142
ENSG00000012124	CD22	protein_coding	1	2	0	0	0	0	0	0	1
ENSG00000012171	SEMA3B	protein_coding	59	49	69	45	66	52	50	55	103
ENSG00000012174	MBTPS2	protein_coding	1832	1063	2994	1967	2395	1745	1225	1505	2304
ENSG00000012211	PRICKLE3	protein_coding	139	115	213	132	155	111	87	143	206
ENSG00000012223	LTF	protein_coding	1	1	0	0	0	0	0	0	1
ENSG00000012232	EXTL3	protein_coding	317	219	518	477	582	441	345	355	647
ENSG00000012504	NR1H4	protein_coding	0	0	0	1	1	0	0	0	0
ENSG00000012660	ELOVL5	protein_coding	2322	1606	3948	1978	2372	1987	1773	2491	3437
ENSG00000012779	ALOX5	protein_coding	0	0	0	0	0	0	0	0	0
ENSG00000012817	KDM5D	protein_coding	16	9	25	31	37	65	5	19	41
ENSG00000012822	CALCOCO1	protein_coding	1833	1270	2127	1048	1048	608	1206	1588	1970
ENSG00000012963	UBR7	protein_coding	3	5	0	4	3	9	13	4	11
ENSG00000012983	MAP4K5	protein_coding	510	260	885	764	887	807	454	503	819
ENSG00000013016	EHD3	protein_coding	77	68	99	72	86	57	54	66	87
ENSG00000013275	PSMC4	protein_coding	22	12	26	20	31	17	19	31	18
ENSG00000013288	MAN2B2	protein_coding	244	213	388	232	245	151	218	263	407
ENSG00000013293	SLC7A14	protein_coding	0	0	0	0	0	0	0	0	0
ENSG00000013297	CLDN11	protein_coding	6	0	1	0	0	0	5	1	0
ENSG00000013306	SLC25A39	protein_coding	1710	1256	3130	1956	2121	1810	1639	1977	3396
ENSG00000013364	MVP	protein_coding	48	44	63	55	57	55	29	47	105
ENSG00000013374	NUB1	protein_coding	3802	2779	6011	3858	4512	3599	3900	4396	5829
ENSG00000013375	PGM3	protein_coding	1374	1034	2340	2046	2426	2075	1249	1656	2376
ENSG00000013392	RWDD2A	protein_coding	515	235	574	639	620	384	328	411	552
ENSG00000013441	CLK1	protein_coding	1748	1268	2626	2624	2931	2211	2143	2422	3785
ENSG00000013503	POLR3B	protein_coding	1075	648	1872	1307	1554	1323	776	745	1151
ENSG00000013523	ANGEL1	protein_coding	781	653	1302	1075	1127	920	526	752	1275
ENSG00000013561	RNF14	protein_coding	829	676	1180	945	1098	834	843	937	1443
ENSG00000013563	DNASE1L1	protein_coding	74	98	172	138	194	133	119	114	192
ENSG00000013573	DDX11	protein_coding	894	620	1335	745	851	513	699	933	1613
ENSG00000013583	HEBP1	protein_coding	1450	1121	2159	1506	1626	1292	1571	1975	2508
ENSG00000013588	GPRC5A	protein_coding	172	77	223	103	106	64	113	197	212
ENSG00000013619	MAMLD1	protein_coding	56	43	50	48	55	39	40	42	75
ENSG00000013725	CD6	protein_coding	0	0	0	0	0	0	0	0	1
ENSG00000013810	TACC3	protein_coding	3720	2729	5281	3499	3730	2798	4087	5266	7131
ENSG00000014123	UFL1	protein_coding	1552	1163	2374	1576	1919	1577	1202	1306	1908
ENSG00000014138	POLA2	protein_coding	1991	1144	2709	2780	3382	2586	1592	2023	2758
ENSG00000014164	ZC3H3	protein_coding	58	66	122	68	78	75	51	46	96
ENSG00000014216	CAPN1	protein_coding	1058	678	1718	1096	1294	986	821	1045	1390
ENSG00000014257	ACPP	protein_coding	8	0	11	6	2	12	9	5	9
ENSG00000014641	MDH1	protein_coding	60800	59432	78261	38477	42137	29059	47558	63917	85076
ENSG00000014824	SLC30A9	protein_coding	744	524	1307	1135	1278	1112	698	919	1305
ENSG00000014914	MTMR11	protein_coding	17	14	50	47	25	23	24	22	57
ENSG00000014919	COX15	protein_coding	2489	1889	3528	3407	3302	2514	2188	2832	4177
ENSG00000015133	CCDC88C	protein_coding	383	339	599	474	561	464	301	435	604
ENSG00000015153	YAF2	protein_coding	277	223	459	321	389	334	280	365	585
ENSG00000015171	ZMYND11	protein_coding	361	274	545	402	506	366	299	363	571
ENSG00000015285	WAS	protein_coding	32	25	54	35	51	42	22	32	62
ENSG00000015413	DPEP1	protein_coding	10	8	15	9	16	14	9	12	16
ENSG00000015475	BID	protein_coding	369	378	575	381	409	262	358	502	701
ENSG00000015479	MATR3.2	protein_coding	14	15	29	42	44	26	25	20	58
ENSG00000015520	NPC1L1	protein_coding	27	33	49	36	21	13	14	21	56
ENSG00000015532	XYLT2	protein_coding	275	249	505	400	418	305	280	329	572
ENSG00000015568	RGPD5	protein_coding	23	38	71	79	116	56	44	21	34
ENSG00000015592	STMN4	protein_coding	0	1	3	4	4	6	1	3	2
ENSG00000015676	NUDCD3	protein_coding	1273	1936	1896	1196	1316	938	996	1286	1898
ENSG00000016082	ISL1	protein_coding	384	281	576	352	322	235	309	395	547
ENSG00000016391	CHDH	protein_coding	231	179	433	366	404	303	240	256	454
ENSG00000016402	IL20RA	protein_coding	0	0	0	0	0	0	0	0	1
ENSG00000016490	CLCA1	protein_coding	0	0	0	0	0	0	0	0	0
ENSG00000016602	CLCA4	protein_coding	0	0	0	0	1	0	0	0	1
ENSG00000016864	GLT8D1	protein_coding	575	447	922	570	668	544	477	582	976
ENSG00000017260	ATP2C1	protein_coding	2709	1103	4115	2293	2776	1823	1556	2114	2347
ENSG00000017427	IGF1	protein_coding	0	0	0	0	0	0	0	0	0
ENSG00000017483	SLC38A5	protein_coding	1	1	6	2	3	2	3	2	7
ENSG00000017797	RALBP1	protein_coding	480	392	673	594	687	416	465	665	860
ENSG00000018189	RUFY3	protein_coding	490	402	839	594	601	491	521	539	761
ENSG00000018236	CNTN1	protein_coding	310	192	429	245	294	226	172	238	292
ENSG00000018280	SLC11A1	protein_coding	2	9	6	8	3	2	1	7	11
ENSG00000018408	WWTR1	protein_coding	661	641	1018	494	573	435	663	918	1245
ENSG00000018510	AGPS	protein_coding	1765	1271	2467	2381	2632	1936	1357	1579	2315
ENSG00000018607	ZNF806	unprocessed_pseudogene	2	0	0	2	1	0	3	1	0
ENSG00000018610	CXorf56	protein_coding	813	632	1275	774	985	723	950	1360	1835
ENSG00000018625	ATP1A2	protein_coding	2	1	0	0	0	1	1	0	0
ENSG00000018699	TTC27	protein_coding	964	725	1539	1514	1722	1371	654	691	1132
ENSG00000018869	ZNF582	protein_coding	223	160	319	102	126	97	174	243	266
ENSG00000019102	VSIG2	protein_coding	1	3	2	1	7	3	5	3	1
ENSG00000019144	PHLDB1	protein_coding	677	438	846	903	969	592	485	522	634
ENSG00000019169	MARCO	protein_coding	0	1	2	0	3	1	0	0	0
ENSG00000019186	CYP24A1	protein_coding	0	0	0	2	0	0	0	3	1
ENSG00000019485	PRDM11	protein_coding	28	26	55	63	70	23	30	28	70
ENSG00000019505	SYT13	protein_coding	1	2	6	7	6	1	3	1	3
ENSG00000019549	SNAI2	protein_coding	155	89	307	165	181	179	119	192	298
ENSG00000019582	CD74	protein_coding	10	8	9	9	7	4	9	7	7
ENSG00000019991	HGF	protein_coding	0	0	3	1	3	4	0	1	4
ENSG00000019995	ZRANB1	protein_coding	1044	844	1593	935	1055	753	808	1115	1579
ENSG00000020129	NCDN	protein_coding	809	580	1285	797	892	616	600	694	1085
ENSG00000020181	ADGRA2	protein_coding	65	57	125	106	89	58	68	86	133
ENSG00000020219	CCT8L1P	processed_pseudogene	4	1	1	6	1	0	2	3	6
ENSG00000020256	ZFP64	protein_coding	1329	649	1847	1508	1984	1366	985	1404	1662
ENSG00000020426	MNAT1	protein_coding	1033	1359	1405	1108	1100	917	951	1202	1769
ENSG00000020577	SAMD4A	protein_coding	105	85	170	110	135	82	67	99	141
ENSG00000020633	RUNX3	protein_coding	24	25	48	23	25	27	20	25	59
ENSG00000020922	MRE11	protein_coding	1334	765	2003	1962	2222	1932	899	995	1431
ENSG00000021300	PLEKHB1	protein_coding	459	366	639	379	408	278	645	817	940
ENSG00000021355	SERPINB1	protein_coding	699	517	1027	630	865	698	720	832	1258
ENSG00000021461	CYP3A43	protein_coding	0	2	1	0	0	0	0	0	0
ENSG00000021488	SLC7A9	protein_coding	5	2	6	10	2	4	2	2	4
ENSG00000021574	SPAST	protein_coding	598	603	976	706	769	658	613	654	1069
ENSG00000021645	NRXN3	protein_coding	193	173	308	216	220	184	125	171	261
ENSG00000021762	OSBPL5	protein_coding	138	90	191	109	145	101	125	130	231
ENSG00000021776	AQR	protein_coding	2883	2658	4648	3900	4344	3792	1947	2145	3413
ENSG00000021826	CPS1	protein_coding	335	267	556	569	668	533	283	315	514
ENSG00000021852	C8B	protein_coding	0	0	0	0	0	0	0	0	0
ENSG00000022267	FHL1	protein_coding	4100	3255	6624	3588	3896	3126	3852	5478	6549
ENSG00000022277	RTFDC1	protein_coding	2909	2332	4525	3117	3666	2890	3118	3871	4957
ENSG00000022355	GABRA1	protein_coding	0	1	0	0	0	0	0	0	0
ENSG00000022556	NLRP2	protein_coding	0	0	0	0	0	0	0	0	0
ENSG00000022567	SLC45A4	protein_coding	145	114	265	160	168	162	116	183	285
ENSG00000022840	RNF10	protein_coding	545	597	1010	862	1020	767	675	887	1457
ENSG00000022976	ZNF839	protein_coding	194	166	295	215	271	203	167	190	317
ENSG00000023041	ZDHHC6	protein_coding	370	382	631	497	514	418	397	435	745
ENSG00000023171	GRAMD1B	protein_coding	96	85	153	94	134	113	77	70	160
ENSG00000023191	RNH1	protein_coding	457	3	43	145	179	11	14	438	327
ENSG00000023228	NDUFS1	protein_coding	28	10	66	52	74	15	20	15	36
ENSG00000023287	RB1CC1	protein_coding	1871	902	3076	2349	2976	2100	2024	2540	3290
ENSG00000023318	ERP44	protein_coding	9601	6648	13878	6291	6902	5220	6085	7923	11968
ENSG00000023330	ALAS1	protein_coding	1883	1360	2496	1620	1822	1355	1961	2568	3663
ENSG00000023445	BIRC3	protein_coding	2	0	3	4	5	1	0	0	1
ENSG00000023516	AKAP11	protein_coding	1128	808	1896	1792	2025	1496	985	1166	1847
ENSG00000023572	GLRX2	protein_coding	685	443	1107	650	932	775	600	936	1175
ENSG00000023608	SNAPC1	protein_coding	640	678	829	506	543	357	521	508	657
ENSG00000023697	DERA	protein_coding	708	567	1176	771	771	653	621	753	1124
ENSG00000023734	STRAP	protein_coding	7859	4631	12581	9799	10539	8511	6712	8708	12289
ENSG00000023839	ABCC2	protein_coding	11	23	31	29	43	28	21	25	58
ENSG00000023892	DEF6	protein_coding	40	44	83	52	47	39	31	46	78
ENSG00000023902	PLEKHO1	protein_coding	299	274	456	315	306	273	222	293	482
ENSG00000023909	GCLM	protein_coding	634	267	1151	881	1139	1071	652	872	1205
ENSG00000024048	UBR2	protein_coding	1886	1460	2745	2340	2589	2201	1124	1106	1755
ENSG00000024422	EHD2	protein_coding	87	67	106	82	85	59	63	94	127
ENSG00000024526	DEPDC1	protein_coding	773	637	1224	928	1167	887	651	903	1544
ENSG00000024862	CCDC28A	protein_coding	368	298	647	329	407	299	412	489	660
ENSG00000025039	RRAGD	protein_coding	140	126	237	150	222	161	109	145	222
ENSG00000025156	HSF2	protein_coding	1198	721	1802	1322	1675	1344	1186	1384	2029
ENSG00000025293	PHF20	protein_coding	649	645	1214	849	957	865	605	671	1181
ENSG00000025423	HSD17B6	protein_coding	272	164	365	248	253	207	182	207	357
ENSG00000025434	NR1H3	protein_coding	97	92	160	107	105	82	117	147	186
ENSG00000025708	TYMP	protein_coding	8	11	19	28	26	12	15	9	23
ENSG00000025770	NCAPH2	protein_coding	933	731	1432	728	787	640	747	838	1369
ENSG00000025772	TOMM34	protein_coding	6852	5339	11557	7367	8476	6772	7028	10251	11995
ENSG00000025796	SEC63	protein_coding	1305	1322	2132	2013	2163	1827	1037	1303	2141
ENSG00000025800	KPNA6	protein_coding	2420	2104	3814	2878	3122	2195	2321	2664	3940
ENSG00000026025	VIM	protein_coding	6431	6132	10306	9221	10079	8186	5863	6406	9959
ENSG00000026036	RTEL1-TNFRSF6B	protein_coding	16	5	14	10	26	10	9	12	29
ENSG00000026103	FAS	protein_coding	69	67	108	106	105	102	67	81	97
ENSG00000026297	RNASET2	protein_coding	199	151	300	156	172	163	188	229	391
ENSG00000026508	CD44	protein_coding	23	23	27	15	8	8	12	10	5
ENSG00000026559	KCNG1	protein_coding	93	85	185	102	90	74	117	86	213
ENSG00000026652	AGPAT4	protein_coding	1192	901	2048	1024	1248	925	1107	1405	2114
ENSG00000026751	SLAMF7	protein_coding	1	0	1	0	0	2	0	1	0
ENSG00000026950	BTN3A1	protein_coding	65	50	106	92	103	75	67	60	111
ENSG00000027001	MIPEP	protein_coding	608	509	1061	884	1052	926	464	586	857
ENSG00000027075	PRKCH	protein_coding	125	187	216	167	204	189	113	172	296
ENSG00000027644	INSRR	protein_coding	1	1	3	3	3	2	5	3	2
ENSG00000027697	IFNGR1	protein_coding	1633	1208	2498	1509	1712	1427	1400	1959	2692
ENSG00000027847	B4GALT7	protein_coding	259	229	381	239	254	174	220	223	451
ENSG00000027869	SH2D2A	protein_coding	60	26	90	45	56	56	42	51	74
ENSG00000028116	VRK2	protein_coding	443	358	675	612	797	541	322	389	595
ENSG00000028137	TNFRSF1B	protein_coding	0	11	1	1	6	4	0	1	3
ENSG00000028203	VEZT	protein_coding	463	395	785	621	729	633	411	529	821
ENSG00000028277	POU2F2	protein_coding	24	16	32	23	25	16	22	20	33
ENSG00000028310	BRD9	protein_coding	475	496	873	601	700	619	458	508	1008
ENSG00000028528	SNX1	protein_coding	953	720	1426	1127	1244	966	821	1070	1413
ENSG00000028839	TBPL1	protein_coding	261	191	549	381	418	341	337	506	678
ENSG00000029153	ARNTL2	protein_coding	51	55	79	102	119	92	48	56	99
ENSG00000029363	BCLAF1	protein_coding	3049	3224	4979	3796	4009	3563	3112	3769	6257
ENSG00000029364	SLC39A9	protein_coding	1187	1034	1730	873	930	658	1158	1469	1924
ENSG00000029534	ANK1	protein_coding	92	55	139	79	96	57	61	74	93
ENSG00000029559	IBSP	protein_coding	0	0	0	0	0	0	0	0	0
ENSG00000029639	TFB1M	protein_coding	639	347	1093	828	929	909	612	696	1037
ENSG00000029725	RABEP1	protein_coding	1565	1357	2509	1961	2098	1638	1725	2021	3297
ENSG00000029993	HMGB3	protein_coding	2258	1822	3422	1899	2303	1570	2174	2904	4040
ENSG00000030066	NUP160	protein_coding	3029	2570	5104	5151	5624	4829	2006	2259	3660
ENSG00000030110	BAK1	protein_coding	303	242	506	225	243	213	304	512	716
ENSG00000030304	MUSK	protein_coding	2	0	0	0	0	0	0	0	1
ENSG00000030419	IKZF2	protein_coding	55	40	119	68	64	39	72	78	114
ENSG00000030582	GRN	protein_coding	5232	4299	6948	2565	2817	1885	3685	4749	7089
ENSG00000031003	FAM13B	protein_coding	535	871	1018	908	914	832	647	727	1336
ENSG00000031081	ARHGAP31	protein_coding	60	58	80	89	94	58	68	58	110
ENSG00000031691	CENPQ	protein_coding	520	322	872	601	746	594	760	858	1193
ENSG00000031698	SARS	protein_coding	6837	5235	9271	6837	7195	5234	6186	7485	10600
ENSG00000031823	RANBP3	protein_coding	1190	1087	1796	1416	1518	1225	1105	1394	2307
ENSG00000032219	ARID4A	protein_coding	782	875	1213	1102	1182	1016	760	786	1523
ENSG00000032389	TSSC1	protein_coding	693	383	955	644	653	432	594	783	1324
ENSG00000032444	PNPLA6	protein_coding	212	205	346	374	402	321	178	222	346
ENSG00000032742	IFT88	protein_coding	158	109	237	243	241	191	108	110	199
ENSG00000033011	ALG1	protein_coding	897	392	1540	641	776	569	661	907	1202
ENSG00000033030	ZCCHC8	protein_coding	1529	1081	2194	2281	2274	1878	1200	1428	2291
ENSG00000033050	ABCF2	protein_coding	2852	3374	4805	3552	3797	3214	2265	2369	4293
ENSG00000033100	CHPF2	protein_coding	552	483	910	789	840	652	519	585	1147
ENSG00000033122	LRRC7	protein_coding	0	0	5	2	0	0	1	4	0
ENSG00000033170	FUT8	protein_coding	324	218	441	332	356	276	266	344	529
ENSG00000033178	UBA6	protein_coding	1684	1075	2858	2181	2730	2262	1244	1565	2261
ENSG00000033327	GAB2	protein_coding	107	82	129	142	131	108	71	84	153
ENSG00000033627	ATP6V0A1	protein_coding	3314	2553	4856	3660	4072	2923	2432	2706	4657
ENSG00000033800	PIAS1	protein_coding	1197	751	1870	1409	1597	1286	1240	1417	2117
ENSG00000033867	SLC4A7	protein_coding	1152	998	1626	1420	1562	1292	844	929	1410
ENSG00000034053	APBA2	protein_coding	8	7	6	2	9	2	4	2	13
ENSG00000034152	MAP2K3	protein_coding	1406	1530	1964	1528	1692	1095	1197	1406	2322
ENSG00000034239	EFCAB1	protein_coding	0	0	1	2	2	2	0	0	2
ENSG00000034510	TMSB10	protein_coding	2477	2283	3645	3090	3079	2616	2222	2925	4605
ENSG00000034533	ASTE1	protein_coding	254	147	418	326	419	322	217	308	405
ENSG00000034677	RNF19A	protein_coding	312	197	503	418	454	378	274	343	529
ENSG00000034693	PEX3	protein_coding	619	379	973	813	988	820	480	534	830
ENSG00000034713	GABARAPL2	protein_coding	3098	2579	4696	2970	3266	2484	3558	4913	6665
ENSG00000034971	MYOC	protein_coding	0	0	0	0	0	0	0	1	0
ENSG00000035115	SH3YL1	protein_coding	72	60	98	89	124	87	42	73	120
ENSG00000035141	FAM136A	protein_coding	356	365	732	514	617	531	411	560	877
ENSG00000035403	VCL	protein_coding	4061	3331	5982	4396	4907	3832	2567	2625	4173
ENSG00000035499	DEPDC1B	protein_coding	689	580	1122	726	883	711	688	1016	1300
ENSG00000035664	DAPK2	protein_coding	13	11	31	21	12	25	20	13	25
ENSG00000035681	NSMAF	protein_coding	240	191	398	322	437	355	187	206	321
ENSG00000035687	ADSS	protein_coding	2119	1695	3587	3122	3664	3320	1626	2368	3110
ENSG00000035720	STAP1	protein_coding	0	1	0	4	1	0	1	1	2
ENSG00000035862	TIMP2	protein_coding	824	390	1036	197	200	151	485	848	854
ENSG00000035928	RFC1	protein_coding	1193	1029	2474	1837	2263	2044	1179	1116	2164
ENSG00000036054	TBC1D23	protein_coding	649	526	1000	881	1046	818	632	720	1133
ENSG00000036257	CUL3	protein_coding	6248	3503	8632	7579	8985	6169	3987	5110	7261
ENSG00000036448	MYOM2	protein_coding	3	0	4	3	0	3	1	4	1
ENSG00000036473	OTC	protein_coding	0	0	0	0	0	0	0	0	0
ENSG00000036530	CYP46A1	protein_coding	2	4	4	5	2	4	5	5	7
ENSG00000036549	ZZZ3	protein_coding	1152	934	1808	1563	1764	1474	1034	1373	2082
ENSG00000036565	SLC18A1	protein_coding	1	0	0	0	0	0	0	0	0
ENSG00000036672	USP2	protein_coding	614	708	962	542	564	453	652	750	1222
ENSG00000036828	CASR.1	protein_coding	0	0	0	0	0	0	0	0	0
ENSG00000037042	TUBG2	protein_coding	56	68	99	52	123	67	52	65	113
ENSG00000037241	RPL26L1	protein_coding	287	250	450	402	500	417	341	522	610
ENSG00000037280	FLT4	protein_coding	984	1071	1396	853	977	714	816	1020	1756
ENSG00000037474	NSUN2	protein_coding	5552	4809	9121	5903	6335	5367	4886	5397	7984
ENSG00000037637	FBXO42	protein_coding	537	396	804	613	626	463	490	585	880
ENSG00000037749	MFAP3	protein_coding	1279	823	1645	831	962	743	877	1149	1591
ENSG00000037757	MRI1	protein_coding	765	547	1116	724	889	634	694	753	1230
ENSG00000037897	METTL1	protein_coding	1183	1236	1982	1258	1343	1055	1078	1163	1686
ENSG00000037965	HOXC8	protein_coding	81	106	87	89	88	64	64	82	133
ENSG00000038002	AGA	protein_coding	1256	844	1775	1034	1212	975	881	1126	1507
ENSG00000038210	PI4K2B	protein_coding	56	53	72	51	51	33	34	29	59
ENSG00000038219	BOD1L1	protein_coding	2127	2002	3406	2691	3090	2825	1984	2440	3794
ENSG00000038274	MAT2B	protein_coding	909	838	1347	1053	1150	884	893	1229	1626
ENSG00000038295	TLL1	protein_coding	54	23	70	52	62	42	39	30	39
ENSG00000038358	EDC4	protein_coding	1270	944	2051	1390	1681	1230	849	1125	1527
ENSG00000038382	TRIO	protein_coding	841	800	1345	1363	1395	1220	719	696	1411
ENSG00000038427	VCAN	protein_coding	4105	3130	5638	3378	3847	2785	1985	2617	3406
ENSG00000038532	CLEC16A	protein_coding	1449	901	2298	1377	1470	1147	1376	1677	2141
ENSG00000038945	MSR1	protein_coding	0	0	0	0	0	0	0	0	0
ENSG00000039068	CDH1	protein_coding	204	124	313	124	164	109	121	145	191
ENSG00000039123	SKIV2L2	protein_coding	2825	2067	4464	3919	4529	3983	1581	1458	2651
ENSG00000039139	DNAH5	protein_coding	4	7	3	11	11	5	7	4	5
ENSG00000039319	ZFYVE16	protein_coding	1003	692	1719	1581	1919	1577	825	942	1362
ENSG00000039523	FAM65A	protein_coding	2	8	7	5	9	9	4	5	17
ENSG00000039537	C6	protein_coding	0	0	0	0	0	0	0	0	1
ENSG00000039560	RAI14	protein_coding	955	822	1629	1481	1589	1262	899	979	1277
ENSG00000039600	SOX30	protein_coding	8	0	8	7	3	2	3	3	12
ENSG00000039650	PNKP	protein_coding	434	282	563	364	384	345	327	361	632
ENSG00000039987	BEST2	protein_coding	7	6	17	5	9	8	7	5	15
ENSG00000040199	PHLPP2	protein_coding	344	278	609	479	563	438	378	444	774
ENSG00000040275	SPDL1	protein_coding	2879	2506	4315	3810	4350	3432	3186	4280	5707
ENSG00000040341	STAU2	protein_coding	558	470	1105	595	731	657	546	641	912
ENSG00000040487	PQLC2	protein_coding	329	289	448	290	316	238	321	394	566
ENSG00000040531	CTNS	protein_coding	483	409	672	500	489	413	373	463	731
ENSG00000040608	RTN4R	protein_coding	41	57	89	92	67	65	62	81	107
ENSG00000040633	PHF23	protein_coding	1134	1147	1657	1140	1255	1077	987	1317	1913
ENSG00000040731	CDH10	protein_coding	12	14	19	10	14	12	5	9	21
ENSG00000040933	INPP4A	protein_coding	425	310	727	601	632	544	395	481	808
ENSG00000041353	RAB27B	protein_coding	0	2	9	1	3	1	5	2	4
ENSG00000041357	PSMA4	protein_coding	18941	9182	33144	14634	17132	15290	19433	28838	39597
ENSG00000041515	MYO16	protein_coding	0	0	0	0	0	0	0	0	1
ENSG00000041802	LSG1	protein_coding	1110	991	1806	1336	1592	1151	1196	1445	2131
ENSG00000041880	PARP3	protein_coding	89	60	119	83	73	80	101	73	118
ENSG00000041982	TNC	protein_coding	109	103	165	74	73	75	39	50	77
ENSG00000041988	THAP3	protein_coding	111	96	211	139	119	91	114	141	214
ENSG00000042062	FAM65C	protein_coding	1	6	3	3	5	3	0	0	2
ENSG00000042088	TDP1	protein_coding	391	312	603	575	637	503	334	409	629
ENSG00000042286	AIFM2	protein_coding	311	359	489	296	309	212	289	435	626
ENSG00000042304	C2orf83	protein_coding	0	0	0	0	0	0	0	0	0
ENSG00000042317	SPATA7	protein_coding	86	66	182	148	188	165	101	111	195
ENSG00000042429	MED17	protein_coding	2111	982	3212	2107	2537	2010	1560	1963	2851
ENSG00000042445	RETSAT	protein_coding	309	244	489	400	411	395	319	431	684
ENSG00000042493	CAPG	protein_coding	161	185	235	170	161	117	188	235	325
ENSG00000042753	AP2S1	protein_coding	3314	2204	5645	2883	3352	2808	3405	5459	6690
ENSG00000042781	USH2A	protein_coding	0	0	10	1	0	0	0	4	3
ENSG00000042813	ZPBP	protein_coding	0	0	0	0	0	0	0	0	0
ENSG00000042832	TG	protein_coding	0	0	2	2	6	5	2	1	14
ENSG00000042980	ADAM28	protein_coding	0	0	0	0	0	0	0	0	0
ENSG00000043039	BARX2	protein_coding	61	58	111	70	91	55	58	87	113
ENSG00000043093	DCUN1D1	protein_coding	566	459	954	767	1018	912	553	821	1161
ENSG00000043143	JADE2	protein_coding	151	133	193	120	123	119	158	132	179
ENSG00000043355	ZIC2	protein_coding	1326	1115	2039	1193	1212	964	1138	1322	2064
ENSG00000043462	LCP2	protein_coding	0	12	1	0	0	0	0	0	2
ENSG00000043514	TRIT1	protein_coding	421	425	694	506	585	525	373	467	765
ENSG00000043591	ADRB1	protein_coding	7	1	6	2	4	4	4	3	5
ENSG00000044012	GUCA2B	protein_coding	0	1	0	0	0	0	0	0	0
ENSG00000044090	CUL7	protein_coding	481	556	783	585	704	589	331	417	754
ENSG00000044115	CTNNA1	protein_coding	4711	3710	7158	4678	5063	4196	3043	2887	4716
ENSG00000044446	PHKA2	protein_coding	403	341	662	558	622	564	269	350	627
ENSG00000044459	CNTLN	protein_coding	273	356	384	332	419	346	247	318	426
ENSG00000044524	EPHA3	protein_coding	248	98	309	197	210	159	178	180	234
ENSG00000044574	HSPA5	protein_coding	63406	45452	81047	30312	29803	22147	39600	54106	75986
ENSG00000046604	DSG2	protein_coding	5689	4649	9004	4884	5637	4631	3626	4658	6248
ENSG00000046647	GEMIN8	protein_coding	273	251	366	264	312	280	210	296	405
ENSG00000046651	OFD1	protein_coding	338	395	536	603	831	576	309	343	694
ENSG00000046653	GPM6B	protein_coding	317	422	565	337	342	225	279	332	514
ENSG00000046774	MAGEC2	protein_coding	0	0	2	3	4	1	0	5	5
ENSG00000046889	PREX2	protein_coding	85	65	138	170	165	174	74	81	137
ENSG00000047056	WDR37	protein_coding	295	238	482	592	633	473	389	490	749
ENSG00000047188	YTHDC2	protein_coding	2089	1829	3543	3480	4111	3108	1217	1132	1955
ENSG00000047230	CTPS2	protein_coding	583	437	903	811	826	759	385	519	708
ENSG00000047249	ATP6V1H	protein_coding	1802	1479	2672	2153	2456	2122	1598	1964	2797
ENSG00000047315	POLR2B	protein_coding	7260	3325	11250	14117	16121	11458	5785	6884	9612
ENSG00000047346	FAM214A	protein_coding	182	81	231	205	203	182	248	233	329
ENSG00000047365	ARAP2	protein_coding	81	58	160	128	163	149	83	107	165
ENSG00000047410	TPR	protein_coding	13429	13847	21840	21655	24774	22006	10082	11961	19251
ENSG00000047457	CP	protein_coding	0	3	3	0	6	1	1	5	2
ENSG00000047578	KIAA0556	protein_coding	303	294	445	448	461	330	288	338	457
ENSG00000047579	DTNBP1	protein_coding	1696	1051	2409	1470	1787	1264	1481	1746	2600
ENSG00000047597	XK	protein_coding	45	26	45	25	46	27	22	25	36
ENSG00000047617	ANO2	protein_coding	2	0	2	2	1	0	0	5	2
ENSG00000047621	C12orf4	protein_coding	583	476	956	827	858	830	540	627	955
ENSG00000047634	SCML1	protein_coding	1762	1120	2684	2169	2184	1784	1806	2064	3313
ENSG00000047644	WWC3	protein_coding	0	1	3	1	3	2	1	1	1
ENSG00000047648	ARHGAP6	protein_coding	1	1	0	3	0	6	2	2	7
ENSG00000047662	FAM184B	protein_coding	12	19	23	20	36	16	22	16	39
ENSG00000047849	MAP4	protein_coding	4699	3798	7342	4885	5287	4462	3794	5366	7271
ENSG00000047932	GOPC	protein_coding	1118	969	1601	1341	1420	1143	1003	1137	1785
ENSG00000047936	ROS1	protein_coding	0	0	1	2	2	0	0	0	0
ENSG00000048028	USP28	protein_coding	863	613	1326	1086	1374	1117	607	834	1171
ENSG00000048052	HDAC9	protein_coding	15	8	11	9	28	11	14	26	16
ENSG00000048140	TSPAN17	protein_coding	166	136	273	214	266	160	127	152	286
ENSG00000048162	NOP16	protein_coding	546	421	974	530	711	612	521	737	1116
ENSG00000048342	CC2D2A	protein_coding	147	146	260	200	221	193	112	95	172
ENSG00000048392	RRM2B	protein_coding	221	196	378	352	425	370	224	301	424
ENSG00000048405	ZNF800	protein_coding	384	241	584	418	537	490	316	465	687
ENSG00000048462	TNFRSF17	protein_coding	0	2	0	0	2	1	0	2	1
ENSG00000048471	SNX29	protein_coding	310	300	513	486	507	375	362	351	636
ENSG00000048540	LMO3	protein_coding	0	0	0	4	1	2	0	0	2
ENSG00000048544	MRPS10	protein_coding	939	1180	1447	969	1106	917	709	1044	1462
ENSG00000048545	GUCA1A	protein_coding	0	0	3	0	0	1	0	0	0
ENSG00000048649	RSF1	protein_coding	3083	2841	4558	4027	4145	3794	2924	3843	5179
ENSG00000048707	VPS13D	protein_coding	540	491	901	948	1175	959	493	630	1076
ENSG00000048740	CELF2	protein_coding	411	312	651	382	398	338	334	415	571
ENSG00000048828	FAM120A	protein_coding	1089	830	1663	1448	1574	1066	812	1157	1643
ENSG00000048991	R3HDM1	protein_coding	365	266	684	675	752	602	446	468	795
ENSG00000049089	COL9A2	protein_coding	3	3	11	16	6	11	6	16	10
ENSG00000049130	KITLG	protein_coding	135	114	258	184	205	184	160	186	322
ENSG00000049167	ERCC8	protein_coding	145	128	273	183	239	185	149	197	264
ENSG00000049192	ADAMTS6	protein_coding	22	21	47	46	53	41	17	24	50
ENSG00000049239	H6PD	protein_coding	152	121	237	187	239	153	106	147	221
ENSG00000049245	VAMP3	protein_coding	841	626	1362	1065	1294	882	981	1222	1707
ENSG00000049246	PER3	protein_coding	39	13	54	41	46	24	25	35	55
ENSG00000049247	UTS2	protein_coding	1	5	2	2	1	2	0	4	8
ENSG00000049249	TNFRSF9	protein_coding	8	10	20	8	15	17	9	22	23
ENSG00000049283	EPN3	protein_coding	3	4	5	12	5	5	3	5	8
ENSG00000049323	LTBP1	protein_coding	580	411	879	526	595	427	263	292	484
ENSG00000049449	RCN1	protein_coding	966	683	1588	658	735	611	623	864	1102
ENSG00000049540	ELN	protein_coding	0	0	0	0	0	0	0	0	1
ENSG00000049541	RFC2	protein_coding	2455	1376	3874	2931	3386	2912	2199	3115	4338
ENSG00000049618	ARID1B	protein_coding	945	771	1461	987	1054	846	772	919	1250
ENSG00000049656	CLPTM1L	protein_coding	74	51	161	200	190	155	84	83	188
ENSG00000049759	NEDD4L	protein_coding	330	209	477	382	391	301	331	328	458
ENSG00000049768	FOXP3	protein_coding	5	5	9	8	15	5	4	7	12
ENSG00000049769	PPP1R3F	protein_coding	46	48	64	48	53	56	59	52	73
ENSG00000049860	HEXB	protein_coding	1190	698	1748	1376	1419	1218	1019	1244	1679
ENSG00000049883	PTCD2	protein_coding	197	198	365	362	447	378	233	336	523
ENSG00000050030	KIAA2022	protein_coding	54	74	112	87	116	85	40	66	81
ENSG00000050130	JKAMP	protein_coding	671	441	1182	655	785	678	557	709	1065
ENSG00000050165	DKK3	protein_coding	32	20	60	18	17	15	11	40	38
ENSG00000050327	ARHGEF5	protein_coding	0	0	0	1	0	0	0	0	0
ENSG00000050344	NFE2L3	protein_coding	82	60	178	165	190	156	72	60	124
ENSG00000050393	MCUR1	protein_coding	358	264	538	439	509	417	258	394	566
ENSG00000050405	LIMA1	protein_coding	1503	1336	2469	2115	2220	1888	1101	1470	2683
ENSG00000050426	LETMD1	protein_coding	760	512	1220	768	937	749	815	1103	1709
ENSG00000050438	SLC4A8	protein_coding	26	20	54	39	47	30	16	16	25
ENSG00000050555	LAMC3	protein_coding	53	42	77	58	72	54	39	51	85
ENSG00000050628	PTGER3	protein_coding	2	0	1	5	2	4	1	5	3
ENSG00000050730	TNIP3	protein_coding	1	0	0	0	1	0	4	5	3
ENSG00000050748	MAPK9	protein_coding	669	688	1197	1160	1341	1131	622	784	1252
ENSG00000050767	COL23A1	protein_coding	7	12	10	7	17	7	9	8	25
ENSG00000050820	BCAR1	protein_coding	815	711	1260	693	722	492	652	760	1208
ENSG00000051009	FAM160A2	protein_coding	540	538	837	749	803	638	563	709	1195
ENSG00000051108	HERPUD1	protein_coding	689	657	1101	726	761	554	780	938	1379
ENSG00000051128	HOMER3	protein_coding	43	23	70	40	35	19	44	41	64
ENSG00000051180	RAD51	protein_coding	455	372	649	527	584	432	501	597	926
ENSG00000051341	POLQ	protein_coding	861	604	1579	1639	1750	1543	984	1119	1922
ENSG00000051382	PIK3CB	protein_coding	216	168	425	409	473	396	256	289	469
ENSG00000051523	CYBA	protein_coding	1178	964	1643	651	717	471	841	1136	1745
ENSG00000051596	THOC3	protein_coding	1365	896	2263	1536	1484	1530	1000	1582	2120
ENSG00000051620	HEBP2	protein_coding	1519	1096	2535	1097	1367	1010	1531	2096	2848
ENSG00000051825	MPHOSPH9	protein_coding	1066	806	1763	1720	2006	1583	1115	1274	2225
ENSG00000052126	PLEKHA5	protein_coding	627	443	912	648	748	615	435	464	788
ENSG00000052344	PRSS8	protein_coding	14	8	9	10	12	10	7	5	7
ENSG00000052723	SIKE1	protein_coding	1163	890	1963	1233	1577	1186	1105	1631	2098
ENSG00000052749	RRP12	protein_coding	2299	2021	3499	2221	2394	1917	1091	1229	2079
ENSG00000052795	FNIP2	protein_coding	107	102	187	184	203	189	93	99	190
ENSG00000052802	MSMO1	protein_coding	1086	741	1899	1551	1831	1467	998	1270	1910
ENSG00000052841	TTC17	protein_coding	507	457	764	576	643	532	406	529	895
ENSG00000052850	ALX4	protein_coding	91	86	180	130	166	127	63	84	155
ENSG00000053108	FSTL4	protein_coding	12	15	37	10	17	7	7	14	19
ENSG00000053254	FOXN3	protein_coding	112	124	246	220	238	194	110	131	274
ENSG00000053328	METTL24	protein_coding	9	8	14	11	16	5	6	15	22
ENSG00000053371	AKR7A2	protein_coding	782	501	1313	741	840	755	668	1055	1383
ENSG00000053372	MRTO4	protein_coding	3509	3362	4973	2948	3149	2245	2815	3468	5132
ENSG00000053438	NNAT	protein_coding	15	3	14	14	10	10	10	11	18
ENSG00000053501	USE1	protein_coding	463	496	743	378	393	284	495	530	779
ENSG00000053524	MCF2L2	protein_coding	9	13	18	18	16	13	19	12	26
ENSG00000053702	NRIP2	protein_coding	4	6	4	12	11	8	5	7	13
ENSG00000053747	LAMA3	protein_coding	343	280	484	457	548	408	251	261	472
ENSG00000053770	AP5M1	protein_coding	464	294	713	663	761	651	345	413	660
ENSG00000053900	ANAPC4	protein_coding	1152	821	1955	2126	2403	2041	924	956	1536
ENSG00000053918	KCNQ1	protein_coding	8	6	9	6	11	2	7	11	16
ENSG00000054116	TRAPPC3	protein_coding	2188	1570	3895	2873	3311	2940	2571	2979	4471
ENSG00000054118	THRAP3	protein_coding	3077	3229	5274	4020	4338	3842	2498	2272	4227
ENSG00000054148	PHPT1	protein_coding	1918	1560	2831	2157	2377	1814	1992	2706	3803
ENSG00000054179	ENTPD2	protein_coding	6	2	6	7	4	2	1	4	5
ENSG00000054219	LY75	protein_coding	0	1	0	0	0	0	0	0	0
ENSG00000054267	ARID4B	protein_coding	2396	3047	3720	3194	3590	3056	2074	2248	3989
ENSG00000054277	OPN3	protein_coding	4	2	3	8	9	3	7	9	13
ENSG00000054282	SDCCAG8	protein_coding	2	5	9	7	8	11	8	3	2
ENSG00000054356	PTPRN	protein_coding	0	2	2	2	1	0	0	0	0
ENSG00000054392	HHAT	protein_coding	0	0	0	0	0	0	1	1	0
ENSG00000054523	KIF1B	protein_coding	2539	2536	4071	3591	4025	3132	2611	2807	4394
ENSG00000054598	FOXC1	protein_coding	2962	1981	4596	3049	3215	2597	3347	3501	5088
ENSG00000054611	TBC1D22A	protein_coding	173	171	235	186	206	177	152	203	267
ENSG00000054654	SYNE2	protein_coding	719	847	1225	1290	1582	1144	485	631	1366
ENSG00000054690	PLEKHH1	protein_coding	204	165	353	303	411	289	172	188	390
ENSG00000054793	ATP9A	protein_coding	386	307	595	545	540	440	238	313	596
ENSG00000054796	SPO11	protein_coding	0	0	0	0	0	0	0	1	0
ENSG00000054803	CBLN4	protein_coding	1	0	0	0	0	0	0	0	0
ENSG00000054938	CHRDL2	protein_coding	3	3	5	0	3	2	4	1	9
ENSG00000054965	FAM168A	protein_coding	259	157	441	446	444	399	240	336	623
ENSG00000054967	RELT	protein_coding	125	107	186	89	90	82	87	125	212
ENSG00000054983	GALC	protein_coding	125	94	217	129	116	121	126	118	184
ENSG00000055044	NOP58	protein_coding	4693	4989	7957	6610	7911	6224	5142	5303	8815
ENSG00000055070	SZRD1	protein_coding	364	314	539	522	538	458	323	460	735
ENSG00000055118	KCNH2	protein_coding	43	41	67	38	42	53	32	60	76
ENSG00000055130	CUL1	protein_coding	6520	7343	9419	7914	9714	7072	5699	6705	9133
ENSG00000055147	FAM114A2	protein_coding	727	613	1065	764	918	673	704	891	1301
ENSG00000055163	CYFIP2	protein_coding	1362	925	1971	1761	1992	1480	1008	1126	1673
ENSG00000055208	TAB2	protein_coding	599	563	1085	801	997	811	661	810	1217
ENSG00000055211	GINM1	protein_coding	735	418	1123	775	1011	815	594	707	980
ENSG00000055332	EIF2AK2	protein_coding	2203	1714	3711	3043	3242	2900	1586	1762	2662
ENSG00000055483	USP36	protein_coding	1258	1233	2235	2020	2010	1557	1086	1194	2294
ENSG00000055609	KMT2C	protein_coding	1336	1338	2358	2447	2723	2212	1387	1726	2876
ENSG00000055732	MCOLN3	protein_coding	210	189	330	297	381	326	197	224	359
ENSG00000055813	CCDC85A	protein_coding	0	2	0	0	0	2	0	0	1
ENSG00000055917	PUM2	protein_coding	1407	1098	2387	2097	2552	2053	1488	1886	2760
ENSG00000055950	MRPL43	protein_coding	3360	3212	4926	3263	3566	2232	3180	3855	5082
ENSG00000055955	ITIH4	protein_coding	1	2	9	0	1	1	1	0	6
ENSG00000055957	ITIH1	protein_coding	4	0	7	3	3	4	2	0	12
ENSG00000056050	HPF1	protein_coding	656	499	1021	740	816	742	511	733	1028
ENSG00000056097	ZFR	protein_coding	3850	3410	5909	4678	5311	4316	3069	3467	5397
ENSG00000056277	ZNF280C	protein_coding	1496	1370	2055	2014	2134	1846	1346	1606	2402
ENSG00000056291	NPFFR2	protein_coding	9	3	9	12	3	6	2	6	1
ENSG00000056487	PHF21B	protein_coding	57	64	126	98	122	73	49	49	122
ENSG00000056558	TRAF1	protein_coding	22	14	38	36	29	33	15	30	42
ENSG00000056586	RC3H2	protein_coding	591	440	1052	918	949	971	769	923	1530
ENSG00000056736	IL17RB	protein_coding	239	105	323	176	183	157	207	252	351
ENSG00000056972	TRAF3IP2	protein_coding	106	91	159	110	116	74	67	109	171
ENSG00000056998	GYG2	protein_coding	168	131	268	178	212	191	149	187	283
ENSG00000057019	DCBLD2	protein_coding	408	403	694	434	581	478	312	366	601
ENSG00000057149	SERPINB3	protein_coding	0	0	0	0	0	0	0	0	0
ENSG00000057252	SOAT1	protein_coding	4488	3823	6301	5215	5933	4185	3612	4669	6681
ENSG00000057294	PKP2	protein_coding	260	167	378	328	374	303	202	238	337
ENSG00000057468	MSH4	protein_coding	4	13	11	17	24	16	11	10	26
ENSG00000057593	F7	protein_coding	0	0	0	0	1	1	0	4	0
ENSG00000057608	GDI2	protein_coding	4300	2945	6429	5558	6666	5823	3272	3687	5857
ENSG00000057657	PRDM1	protein_coding	5	4	7	7	2	5	1	4	6
ENSG00000057663	ATG5	protein_coding	398	410	585	487	631	529	509	505	907
ENSG00000057704	TMCC3	protein_coding	54	68	122	70	78	59	61	89	110
ENSG00000057757	PITHD1	protein_coding	359	250	592	570	772	623	507	633	998
ENSG00000057935	MTA3	protein_coding	553	389	1030	733	1007	649	506	630	945
ENSG00000058056	USP13	protein_coding	349	277	645	562	630	524	314	378	525
ENSG00000058063	ATP11B	protein_coding	414	387	581	634	718	590	260	369	544
ENSG00000058085	LAMC2	protein_coding	23	19	37	29	22	26	30	39	47
ENSG00000058091	CDK14	protein_coding	105	60	128	109	158	129	92	93	143
ENSG00000058262	SEC61A1	protein_coding	5163	4346	7815	4035	4532	3331	3483	4221	6555
ENSG00000058272	PPP1R12A	protein_coding	2123	2458	3468	2627	2808	2521	1670	1854	3140
ENSG00000058335	RASGRF1	protein_coding	3	1	8	3	6	6	1	5	10
ENSG00000058404	CAMK2B	protein_coding	43	25	86	50	72	45	30	47	88
ENSG00000058453	CROCC	protein_coding	104	120	159	119	172	100	70	93	181
ENSG00000058600	POLR3E	protein_coding	877	788	1562	1086	1258	943	801	912	1511
ENSG00000058668	ATP2B4	protein_coding	1288	898	1940	1193	1440	1026	885	991	1410
ENSG00000058673	ZC3H11A	protein_coding	666	561	1152	1152	1224	1084	783	860	1499
ENSG00000058729	RIOK2	protein_coding	1746	1113	3233	2618	3177	3278	1863	2314	3320
ENSG00000058799	YIPF1	protein_coding	289	214	412	242	248	242	190	288	420
ENSG00000058804	NDC1	protein_coding	1606	965	2738	2060	2450	2030	1111	1575	2336
ENSG00000058866	DGKG	protein_coding	2	2	3	2	0	2	1	0	4
ENSG00000059122	FLYWCH1	protein_coding	869	768	1316	830	951	631	726	887	1330
ENSG00000059145	UNKL	protein_coding	245	247	415	300	341	262	222	301	508
ENSG00000059377	TBXAS1	protein_coding	31	23	54	24	28	18	27	35	62
ENSG00000059378	PARP12	protein_coding	1	0	5	7	4	10	0	5	7
ENSG00000059573	ALDH18A1	protein_coding	3665	2428	5804	4486	5063	4254	2398	3041	4326
ENSG00000059588	TARBP1	protein_coding	1604	1221	2626	2923	3256	2708	1139	1309	2331
ENSG00000059691	GATB	protein_coding	533	515	806	646	723	561	475	603	876
ENSG00000059728	MXD1	protein_coding	208	197	299	267	289	215	224	401	576
ENSG00000059758	CDK17	protein_coding	391	345	612	614	725	610	425	515	676
ENSG00000059769	DNAJC25	protein_coding	416	478	619	309	336	293	294	403	777
ENSG00000059804	SLC2A3	protein_coding	118	94	181	109	108	76	80	130	196
ENSG00000059915	PSD	protein_coding	20	15	39	31	48	39	29	33	53
ENSG00000060069	CTDP1	protein_coding	69	59	97	76	103	65	66	72	105
ENSG00000060138	YBX3	protein_coding	4451	2947	6945	5542	5965	4291	3471	4751	6525
ENSG00000060140	STYK1	protein_coding	12	3	11	17	17	21	5	14	17
ENSG00000060237	WNK1	protein_coding	2478	1919	4036	3250	3724	2750	2248	2717	4042
ENSG00000060303	RPS17P5	processed_pseudogene	5	1	14	4	15	6	5	10	7
ENSG00000060339	CCAR1	protein_coding	4307	6147	6709	6040	6851	5733	4099	4424	7195
ENSG00000060491	OGFR	protein_coding	521	450	805	560	578	470	560	572	877
ENSG00000060558	GNA15	protein_coding	1	0	1	0	1	0	0	2	0
ENSG00000060566	CREB3L3	protein_coding	0	3	3	1	2	0	0	1	5
ENSG00000060642	PIGV	protein_coding	177	100	233	239	215	155	139	194	238
ENSG00000060656	PTPRU	protein_coding	602	522	978	801	800	624	575	590	1130
ENSG00000060688	SNRNP40	protein_coding	2534	1944	4034	3007	3612	2803	2362	3226	4712
ENSG00000060709	RIMBP2	protein_coding	0	1	0	3	4	0	0	4	3
ENSG00000060718	COL11A1	protein_coding	1	0	3	0	0	0	0	0	0
ENSG00000060749	QSER1	protein_coding	947	623	1452	1251	1534	1213	819	928	1347
ENSG00000060762	MPC1	protein_coding	770	783	1366	955	1084	879	713	1004	1532
ENSG00000060971	ACAA1	protein_coding	3369	2654	4756	2931	3018	1970	2997	4040	5511
ENSG00000060982	BCAT1	protein_coding	1390	1242	2260	1725	2009	1606	1166	1378	1988
ENSG00000061273	HDAC7	protein_coding	265	262	478	388	422	273	257	314	535
ENSG00000061337	LZTS1	protein_coding	23	18	19	7	20	22	16	19	20
ENSG00000061455	PRDM6	protein_coding	72	73	134	99	112	94	66	105	129
ENSG00000061492	WNT8A	protein_coding	0	0	3	0	0	0	1	0	0
ENSG00000061656	SPAG4	protein_coding	31	19	44	38	33	36	23	37	86
ENSG00000061676	NCKAP1	protein_coding	4077	2824	6043	4158	4789	3627	3023	3756	5691
ENSG00000061794	MRPS35	protein_coding	1474	1380	2343	1713	1932	1423	1275	1584	2124
ENSG00000061918	GUCY1B3	protein_coding	638	494	972	555	614	500	504	605	818
ENSG00000061936	SFSWAP	protein_coding	878	989	1437	1048	1155	831	856	1066	1730
ENSG00000061938	TNK2	protein_coding	356	403	727	493	550	400	370	453	738
ENSG00000061987	MON2	protein_coding	1108	713	1581	1225	1582	1130	675	779	1124
ENSG00000062038	CDH3	protein_coding	18	5	20	18	8	18	17	17	13
ENSG00000062096	ARSF	protein_coding	0	0	0	0	0	0	0	0	0
ENSG00000062194	GPBP1	protein_coding	1675	1692	2327	2201	2637	2198	2113	2527	3991
ENSG00000062282	DGAT2	protein_coding	26	21	63	23	27	35	24	27	62
ENSG00000062370	ZNF112	protein_coding	19	4	34	31	32	33	15	26	40
ENSG00000062485	CS	protein_coding	3631	1820	6148	5004	5505	4749	3109	4141	5990
ENSG00000062524	LTK	protein_coding	25	29	42	30	25	12	23	30	44
ENSG00000062582	MRPS24	protein_coding	32	38	37	24	28	29	37	36	75
ENSG00000062598	ELMO2	protein_coding	1045	668	1694	991	1062	804	888	1240	1698
ENSG00000062650	WAPL	protein_coding	3209	2603	5123	4654	5559	4480	3306	4096	6208
ENSG00000062716	VMP1	protein_coding	7111	6267	9387	11752	15061	11127	5316	6456	9942
ENSG00000062725	APPBP2	protein_coding	2114	780	3629	2034	2273	1884	2068	2845	3272
ENSG00000062822	POLD1	protein_coding	981	870	1567	891	935	795	697	754	1120
ENSG00000063015	SEZ6	protein_coding	0	0	0	3	8	2	1	10	7
ENSG00000063046	EIF4B	protein_coding	664	438	1225	751	942	747	643	773	1106
ENSG00000063127	SLC6A16	protein_coding	31	41	66	63	60	42	52	53	95
ENSG00000063169	GLTSCR1	protein_coding	217	157	389	355	419	298	226	245	433
ENSG00000063176	SPHK2	protein_coding	184	98	274	176	182	129	158	158	296
ENSG00000063177	RPL18	protein_coding	8210	6996	10999	5051	5267	3992	7625	11756	16110
ENSG00000063180	CA11	protein_coding	177	117	260	194	159	119	140	202	259
ENSG00000063241	ISOC2	protein_coding	435	385	709	349	405	324	311	485	748
ENSG00000063244	U2AF2	protein_coding	7975	6442	11539	7116	7878	5635	6526	8342	11778
ENSG00000063245	EPN1	protein_coding	835	610	1171	752	882	574	655	826	1295
ENSG00000063322	MED29	protein_coding	544	348	909	530	610	445	621	848	1072
ENSG00000063438	AHRR	protein_coding	224	192	331	309	354	269	240	259	539
ENSG00000063515	GSC2	protein_coding	2	0	0	0	0	0	0	0	0
ENSG00000063587	ZNF275	protein_coding	331	279	528	441	482	337	255	403	599
ENSG00000063601	MTMR1	protein_coding	1371	1301	1848	1357	1404	1033	1082	1383	1994
ENSG00000063660	GPC1	protein_coding	844	692	1203	637	667	576	601	778	949
ENSG00000063761	ADCK1	protein_coding	318	244	432	358	389	286	274	277	468
ENSG00000063854	HAGH	protein_coding	754	596	1043	465	552	394	523	816	1151
ENSG00000063978	RNF4	protein_coding	465	499	769	722	813	595	686	736	1226
ENSG00000064012	CASP8	protein_coding	387	296	610	478	554	406	427	457	650
ENSG00000064042	LIMCH1	protein_coding	55	73	74	60	83	74	27	56	105
ENSG00000064102	ASUN	protein_coding	2393	1537	3555	3045	3682	3454	1948	2381	3568
ENSG00000064115	TM7SF3	protein_coding	406	297	734	477	588	476	316	496	706
ENSG00000064195	DLX3	protein_coding	6	2	6	4	6	6	13	12	21
ENSG00000064199	SPA17	protein_coding	102	56	121	142	149	111	138	178	168
ENSG00000064201	TSPAN32	protein_coding	0	0	0	0	1	1	0	1	2
ENSG00000064205	WISP2	protein_coding	0	2	5	0	0	2	1	0	4
ENSG00000064218	DMRT3	protein_coding	15	6	27	13	17	14	12	15	15
ENSG00000064225	ST3GAL6	protein_coding	165	110	245	114	145	123	125	162	245
ENSG00000064270	ATP2C2	protein_coding	3	2	10	10	2	2	0	6	1
ENSG00000064300	NGFR	protein_coding	12	7	19	8	8	6	4	14	13
ENSG00000064309	CDON	protein_coding	779	631	1172	765	744	582	536	633	907
ENSG00000064313	TAF2	protein_coding	1070	722	1815	1566	1890	1540	837	1118	1816
ENSG00000064393	HIPK2	protein_coding	576	499	1072	1172	1172	1087	610	747	1348
ENSG00000064419	TNPO3	protein_coding	2146	1419	3097	2209	2626	2133	1575	1945	3080
ENSG00000064489	BORCS8-MEF2B	protein_coding	0	0	0	0	0	0	0	0	0
ENSG00000064490	RFXANK	protein_coding	422	294	471	277	261	171	327	421	575
ENSG00000064545	TMEM161A	protein_coding	1991	1550	2875	1323	1453	1059	1156	1574	2409
ENSG00000064547	LPAR2	protein_coding	13	15	28	32	28	27	22	24	44
ENSG00000064601	CTSA	protein_coding	691	496	929	512	607	433	411	519	746
ENSG00000064607	SUGP2	protein_coding	2094	1748	3284	2555	2809	2345	1610	1775	3192
ENSG00000064651	SLC12A2	protein_coding	1243	842	1901	1468	1777	1455	751	1021	1382
ENSG00000064652	SNX24	protein_coding	31	35	80	58	89	62	40	49	68
ENSG00000064655	EYA2	protein_coding	92	82	173	104	117	83	62	84	123
ENSG00000064666	CNN2	protein_coding	599	474	919	541	660	443	550	814	969
ENSG00000064687	ABCA7	protein_coding	196	167	314	217	230	175	166	191	339
ENSG00000064692	SNCAIP	protein_coding	28	20	66	41	24	24	14	26	49
ENSG00000064703	DDX20	protein_coding	2982	2064	4353	3657	4260	3076	2392	2766	3984
ENSG00000064726	BTBD1	protein_coding	1522	1225	2848	1880	2375	1773	1467	1856	2882
ENSG00000064763	FAR2	protein_coding	1013	551	1384	816	1001	714	604	739	1042
ENSG00000064787	BCAS1	protein_coding	2	2	6	8	5	1	2	0	8
ENSG00000064835	POU1F1	protein_coding	0	0	0	0	0	0	0	0	0
ENSG00000064886	CHI3L2	protein_coding	0	0	0	1	1	1	0	0	1
ENSG00000064932	SBNO2	protein_coding	3	3	3	10	7	3	6	2	23
ENSG00000064933	PMS1	protein_coding	614	490	947	959	1032	942	527	487	853
ENSG00000064961	HMG20B	protein_coding	322	269	593	356	416	367	237	261	506
ENSG00000064989	CALCRL	protein_coding	25	21	28	36	20	18	15	21	43
ENSG00000064995	TAF11	protein_coding	323	383	533	417	454	396	395	486	743
ENSG00000064999	ANKS1A	protein_coding	801	674	1233	850	1006	656	689	819	1252
ENSG00000065000	AP3D1	protein_coding	3592	3051	5781	5221	5725	4243	2851	3438	6112
ENSG00000065029	ZNF76	protein_coding	199	160	367	250	289	200	157	201	363
ENSG00000065054	SLC9A3R2	protein_coding	285	318	478	463	507	446	309	322	590
ENSG00000065057	NTHL1	protein_coding	987	834	1515	796	867	655	695	991	1282
ENSG00000065060	UHRF1BP1	protein_coding	355	259	582	576	705	466	337	411	731
ENSG00000065135	GNAI3	protein_coding	2543	2925	3838	3955	4347	3642	2536	3228	4467
ENSG00000065150	IPO5	protein_coding	29220	23565	42717	38652	42951	28419	21463	24881	32562
ENSG00000065154	OAT	protein_coding	10504	6533	16385	10200	11234	9103	9035	11911	16365
ENSG00000065183	WDR3	protein_coding	3758	2749	6182	4644	5499	4382	2497	2478	3991
ENSG00000065243	PKN2	protein_coding	1781	1475	2968	2401	2942	2521	1553	1638	2619
ENSG00000065268	WDR18	protein_coding	1109	935	1636	1211	1382	980	928	1179	1638
ENSG00000065308	TRAM2	protein_coding	318	219	500	196	231	163	230	323	533
ENSG00000065320	NTN1	protein_coding	406	270	542	321	343	248	216	288	384
ENSG00000065325	GLP2R	protein_coding	0	0	0	0	0	0	0	0	1
ENSG00000065328	MCM10	protein_coding	5920	4959	8299	6571	7400	5515	5671	5962	8754
ENSG00000065357	DGKA	protein_coding	186	145	283	223	212	143	138	126	198
ENSG00000065361	ERBB3	protein_coding	86	70	168	152	143	119	83	83	173
ENSG00000065371	ROPN1	protein_coding	0	0	0	0	0	0	0	0	1
ENSG00000065413	ANKRD44	protein_coding	4	2	10	22	17	3	6	5	4
ENSG00000065427	KARS	protein_coding	4563	2697	6625	4373	5038	3980	3698	4746	6729
ENSG00000065457	ADAT1	protein_coding	232	171	403	406	366	311	220	249	433
ENSG00000065485	PDIA5	protein_coding	908	650	1305	655	718	529	537	806	1111
ENSG00000065491	TBC1D22B	protein_coding	219	339	414	385	497	367	270	293	582
ENSG00000065518	NDUFB4	protein_coding	1496	734	2266	919	1030	730	1465	2010	2620
ENSG00000065526	SPEN	protein_coding	8570	8358	14362	13802	14192	12830	8375	9088	19788
ENSG00000065534	MYLK	protein_coding	82	91	202	134	157	128	102	121	204
ENSG00000065548	ZC3H15	protein_coding	3300	5766	5141	4144	5069	4172	3267	3931	5917
ENSG00000065559	MAP2K4	protein_coding	411	360	688	543	596	497	356	519	692
ENSG00000065600	TMEM206	protein_coding	568	420	1019	482	444	409	353	522	764
ENSG00000065609	SNAP91	protein_coding	60	41	120	91	84	100	53	70	135
ENSG00000065613	SLK	protein_coding	3579	2257	5990	4686	5277	4299	3502	4209	6109
ENSG00000065615	CYB5R4	protein_coding	175	176	250	237	303	232	161	172	251
ENSG00000065618	COL17A1	protein_coding	1	1	5	2	6	7	4	2	7
ENSG00000065621	GSTO2	protein_coding	44	33	58	49	61	44	33	53	83
ENSG00000065665	SEC61A2	protein_coding	927	483	1290	870	1034	802	694	848	1242
ENSG00000065675	PRKCQ	protein_coding	575	353	902	794	781	645	430	517	580
ENSG00000065717	TLE2	protein_coding	56	40	95	55	77	55	53	72	132
ENSG00000065802	ASB1	protein_coding	262	232	412	300	333	237	202	277	470
ENSG00000065809	FAM107B	protein_coding	185	209	326	305	365	274	237	276	413
ENSG00000065833	ME1	protein_coding	881	553	1449	841	1118	944	828	1042	1572
ENSG00000065882	TBC1D1	protein_coding	205	112	311	242	261	219	194	198	349
ENSG00000065883	CDK13	protein_coding	756	503	1491	1393	1449	1303	611	657	1216
ENSG00000065911	MTHFD2	protein_coding	2611	1621	4207	2739	3645	2879	2768	3843	5063
ENSG00000065923	SLC9A7	protein_coding	688	364	1128	606	659	536	456	642	766
ENSG00000065970	FOXJ2	protein_coding	458	189	717	453	489	381	429	566	667
ENSG00000065978	YBX1	protein_coding	1994	1253	3164	1648	2246	1572	1995	2669	4076
ENSG00000065989	PDE4A	protein_coding	52	36	72	87	90	60	37	64	108
ENSG00000066027	PPP2R5A	protein_coding	1088	1136	1673	767	963	755	1156	1371	1990
ENSG00000066032	CTNNA2	protein_coding	0	1	0	0	2	0	0	0	2
ENSG00000066044	ELAVL1	protein_coding	6316	4258	9146	5995	6748	5117	5284	7140	9710
ENSG00000066056	TIE1	protein_coding	0	3	0	1	0	2	0	1	0
ENSG00000066084	DIP2B	protein_coding	1832	1500	2892	2130	2619	1861	1623	1706	2370
ENSG00000066117	SMARCD1	protein_coding	1918	1224	2904	1845	2058	1489	1751	2388	3211
ENSG00000066135	KDM4A	protein_coding	1767	1382	2797	2050	2254	1949	1408	1477	2357
ENSG00000066136	NFYC	protein_coding	530	324	915	658	781	606	536	681	942
ENSG00000066185	ZMYND12	protein_coding	5	2	5	2	5	2	3	4	11
ENSG00000066230	SLC9A3	protein_coding	29	31	61	41	31	25	27	43	77
ENSG00000066248	NGEF	protein_coding	264	176	404	246	249	169	198	247	356
ENSG00000066279	ASPM	protein_coding	1076	814	2083	2043	2402	2387	847	780	1597
ENSG00000066294	CD84	protein_coding	0	0	0	0	0	0	0	0	0
ENSG00000066322	ELOVL1	protein_coding	1108	905	1637	798	816	673	928	1267	1840
ENSG00000066336	SPI1	protein_coding	4	3	4	0	6	0	2	3	4
ENSG00000066379	ZNRD1	protein_coding	0	2	1	1	0	0	2	3	2
ENSG00000066382	MPPED2	protein_coding	28	28	35	25	32	40	18	28	48
ENSG00000066405	CLDN18	protein_coding	2	2	7	7	8	3	6	4	14
ENSG00000066422	ZBTB11	protein_coding	1068	929	1621	1231	1428	1219	654	691	1091
ENSG00000066427	ATXN3	protein_coding	444	294	734	543	605	478	468	557	798
ENSG00000066455	GOLGA5	protein_coding	1114	893	1742	1620	1536	1093	1316	1467	2016
ENSG00000066468	FGFR2	protein_coding	364	281	562	391	437	464	223	283	497
ENSG00000066557	LRRC40	protein_coding	3121	2054	4784	3698	4460	3758	2586	3005	4653
ENSG00000066583	ISOC1	protein_coding	778	422	1036	562	579	463	607	857	1094
ENSG00000066629	EML1	protein_coding	266	200	403	326	369	291	210	209	424
ENSG00000066651	TRMT11	protein_coding	443	241	691	571	749	784	312	435	666
ENSG00000066654	THUMPD1	protein_coding	620	438	789	632	748	629	625	839	1253
ENSG00000066697	MSANTD3	protein_coding	134	70	178	157	230	200	98	114	198
ENSG00000066735	KIF26A	protein_coding	118	114	209	158	144	131	108	98	250
ENSG00000066739	ATG2B	protein_coding	674	562	947	1032	1147	989	547	695	1144
ENSG00000066777	ARFGEF1	protein_coding	799	564	1334	1130	1355	1149	596	758	1039
ENSG00000066813	ACSM2B	protein_coding	0	0	0	0	0	0	0	0	0
ENSG00000066827	ZFAT	protein_coding	135	131	225	169	216	162	124	139	234
ENSG00000066855	MTFR1	protein_coding	402	268	661	539	736	500	338	429	621
ENSG00000066923	STAG3	protein_coding	13	18	21	10	20	18	11	10	13
ENSG00000066926	FECH	protein_coding	430	422	712	386	450	386	367	487	683
ENSG00000066933	MYO9A	protein_coding	656	590	1057	967	1112	948	677	793	1539
ENSG00000067048	DDX3Y	protein_coding	7	20	13	6	18	7	5	10	18
ENSG00000067057	PFKP	protein_coding	1089	921	1670	1163	1474	1069	864	931	1467
ENSG00000067064	IDI1	protein_coding	1515	827	2496	2166	2400	2263	2155	2882	3950
ENSG00000067066	SP100	protein_coding	4	1	3	3	3	1	4	2	1
ENSG00000067082	KLF6	protein_coding	803	655	1191	827	961	598	732	958	1574
ENSG00000067113	PLPP1	protein_coding	289	315	466	167	173	156	232	308	429
ENSG00000067141	NEO1	protein_coding	1896	1412	3135	1432	1595	1255	1207	1460	2067
ENSG00000067167	TRAM1	protein_coding	3140	1516	4362	3170	3559	2815	2336	3558	4522
ENSG00000067177	PHKA1	protein_coding	655	480	1071	1084	1190	1018	537	570	901
ENSG00000067182	TNFRSF1A	protein_coding	676	474	920	590	622	494	504	759	1029
ENSG00000067191	CACNB1	protein_coding	40	52	67	49	67	45	49	60	94
ENSG00000067208	EVI5	protein_coding	474	429	741	728	771	682	449	596	855
ENSG00000067221	STOML1	protein_coding	84	104	192	127	135	98	64	113	176
ENSG00000067225	PKM	protein_coding	103113	104240	158431	154571	153448	122372	87045	104950	136862
ENSG00000067248	DHX29	protein_coding	1430	1149	2426	1909	2231	2143	890	894	1737
ENSG00000067334	DNTTIP2	protein_coding	4309	2651	8149	5337	5590	5356	5537	6079	9257
ENSG00000067365	METTL22	protein_coding	160	180	240	219	223	209	207	222	435
ENSG00000067369	TP53BP1	protein_coding	2401	2147	3277	3318	3572	2652	1634	2376	3182
ENSG00000067445	TRO	protein_coding	343	316	520	387	449	353	246	218	460
ENSG00000067533	RRP15	protein_coding	1781	1983	2965	2479	2817	2165	1756	1968	3143
ENSG00000067560	RHOA	protein_coding	16031	17697	22970	13173	14074	11025	16864	21498	28055
ENSG00000067596	DHX8	protein_coding	2595	2234	3847	2914	3066	2347	2249	2059	3427
ENSG00000067601	PMS2P4	transcribed_unprocessed_pseudogene	39	47	59	71	66	43	50	59	129
ENSG00000067606	PRKCZ	protein_coding	254	221	507	268	300	217	240	335	453
ENSG00000067646	ZFY	protein_coding	7	21	11	2	5	4	37	7	7
ENSG00000067704	IARS2	protein_coding	3215	2451	5631	5236	6324	5520	2511	3530	4785
ENSG00000067715	SYT1	protein_coding	347	335	476	236	278	211	280	288	472
ENSG00000067798	NAV3	protein_coding	5	7	1	2	3	9	6	1	15
ENSG00000067829	IDH3G	protein_coding	828	501	1517	951	1019	933	744	982	1373
ENSG00000067836	ROGDI	protein_coding	170	106	296	118	153	137	134	241	244
ENSG00000067840	PDZD4	protein_coding	62	52	84	72	95	57	51	59	145
ENSG00000067842	ATP2B3	protein_coding	18	15	30	15	13	11	12	21	32
ENSG00000067900	ROCK1	protein_coding	2037	1904	3247	3223	3485	3002	1707	2128	3352
ENSG00000067955	CBFB	protein_coding	1000	935	1761	1151	1391	1079	1062	1276	1621
ENSG00000067992	PDK3	protein_coding	746	459	1102	872	1038	758	494	645	1130
ENSG00000068001	HYAL2	protein_coding	201	189	386	195	201	168	134	185	336
ENSG00000068024	HDAC4	protein_coding	174	123	246	240	209	199	180	161	329
ENSG00000068028	RASSF1	protein_coding	551	367	930	642	648	492	680	913	1191
ENSG00000068078	FGFR3	protein_coding	357	348	551	458	596	318	401	447	871
ENSG00000068079	IFI35	protein_coding	24	13	45	35	31	25	27	38	63
ENSG00000068097	HEATR6	protein_coding	2036	1075	2853	1310	1529	1029	1411	1704	2231
ENSG00000068120	COASY	protein_coding	1142	812	1648	1250	1364	1021	1048	1082	1895
ENSG00000068137	PLEKHH3	protein_coding	419	280	570	338	371	301	303	407	630
ENSG00000068305	MEF2A	protein_coding	2819	2749	4981	3365	4119	3347	2838	3704	5324
ENSG00000068308	OTUD5	protein_coding	882	603	1323	895	858	696	814	983	1500
ENSG00000068323	TFE3	protein_coding	612	421	871	555	561	421	592	763	1070
ENSG00000068354	TBC1D25	protein_coding	395	250	674	437	413	299	337	533	670
ENSG00000068366	ACSL4	protein_coding	1136	809	1966	1641	1951	1798	823	824	1381
ENSG00000068383	INPP5A	protein_coding	1336	1159	2118	1313	1415	843	1059	1307	1668
ENSG00000068394	GPKOW	protein_coding	756	864	1183	730	800	673	644	858	1309
ENSG00000068400	GRIPAP1	protein_coding	650	644	1144	903	1004	829	495	735	1070
ENSG00000068438	FTSJ1	protein_coding	558	390	944	537	648	552	494	624	963
ENSG00000068489	PRR11	protein_coding	511	247	676	400	529	411	437	644	837
ENSG00000068615	REEP1	protein_coding	185	129	308	192	212	227	152	198	289
ENSG00000068650	ATP11A	protein_coding	271	241	472	457	404	356	211	225	561
ENSG00000068654	POLR1A	protein_coding	2884	2673	4580	3774	4285	3346	2202	2390	4176
ENSG00000068697	LAPTM4A	protein_coding	4351	2947	6459	3875	4365	3573	3600	5002	7581
ENSG00000068724	TTC7A	protein_coding	83	76	132	86	123	100	74	87	143
ENSG00000068745	IP6K2	protein_coding	3580	2531	5340	4478	5053	4194	4771	5758	8699
ENSG00000068781	STON1-GTF2A1L	protein_coding	0	2	3	0	0	0	0	0	0
ENSG00000068784	SRBD1	protein_coding	1056	844	1715	1606	1737	1602	634	770	1133
ENSG00000068796	KIF2A	protein_coding	1729	1447	2659	2199	2549	2294	1528	1822	2854
ENSG00000068831	RASGRP2	protein_coding	41	31	75	37	41	28	23	52	58
ENSG00000068878	PSME4	protein_coding	1527	1094	2720	2419	2874	2390	1195	1524	2407
ENSG00000068885	IFT80	protein_coding	182	142	340	292	381	305	162	220	386
ENSG00000068903	SIRT2	protein_coding	0	0	0	0	0	0	0	0	0
ENSG00000068912	ERLEC1	protein_coding	248	268	503	354	390	340	296	314	539
ENSG00000068971	PPP2R5B	protein_coding	136	156	208	203	175	130	141	142	256
ENSG00000068976	PYGM	protein_coding	22	25	58	66	62	46	36	58	127
ENSG00000068985	PAGE1	protein_coding	0	0	1	2	0	0	1	0	1
ENSG00000069011	PITX1	protein_coding	316	294	572	523	496	429	348	390	789
ENSG00000069018	TRPC7	protein_coding	1	0	1	1	0	0	2	1	5
ENSG00000069020	MAST4	protein_coding	117	76	170	180	194	148	102	105	179
ENSG00000069122	ADGRF5	protein_coding	3	0	0	0	1	1	0	0	0
ENSG00000069188	SDK2	protein_coding	467	368	603	444	484	368	263	368	546
ENSG00000069206	ADAM7	protein_coding	0	0	0	0	0	0	0	0	0
ENSG00000069248	NUP133	protein_coding	7201	5004	12199	9166	11058	9533	4758	4877	8139
ENSG00000069275	NUCKS1	protein_coding	39032	42722	51603	58258	63080	43121	25315	35513	52042
ENSG00000069329	VPS35	protein_coding	4123	3448	6521	4555	4849	4108	3088	3827	5313
ENSG00000069345	DNAJA2	protein_coding	4840	4178	7951	5887	6842	5892	3729	4497	6718
ENSG00000069399	BCL3	protein_coding	7	6	15	13	10	10	3	10	15
ENSG00000069424	KCNAB2	protein_coding	45	18	41	40	36	37	15	24	26
ENSG00000069431	ABCC9	protein_coding	9	3	25	24	14	10	3	7	9
ENSG00000069482	GAL	protein_coding	824	672	1444	703	777	628	757	951	1385
ENSG00000069493	CLEC2D	protein_coding	8	12	12	32	46	34	10	16	41
ENSG00000069509	FUNDC1	protein_coding	979	1043	1784	1324	1383	1206	1036	1294	1805
ENSG00000069535	MAOB	protein_coding	10	8	18	15	28	6	10	17	19
ENSG00000069667	RORA	protein_coding	76	65	123	98	138	113	62	119	201
ENSG00000069696	DRD4	protein_coding	0	0	0	0	0	0	0	0	0
ENSG00000069702	TGFBR3	protein_coding	567	388	889	538	607	505	311	432	652
ENSG00000069712	KIAA1107	protein_coding	0	0	0	0	0	0	0	0	0
ENSG00000069764	PLA2G10	protein_coding	0	0	0	0	0	0	0	0	0
ENSG00000069812	HES2	protein_coding	0	3	6	8	6	0	5	0	2
ENSG00000069849	ATP1B3	protein_coding	3197	1836	4724	2847	3275	2608	2586	3358	4913
ENSG00000069869	NEDD4	protein_coding	533	343	989	707	741	549	374	405	631
ENSG00000069943	PIGB	protein_coding	64	55	101	52	77	67	52	53	95
ENSG00000069956	MAPK6	protein_coding	609	579	871	434	526	389	573	735	1247
ENSG00000069966	GNB5	protein_coding	386	311	611	311	379	270	307	487	589
ENSG00000069974	RAB27A	protein_coding	47	52	69	94	85	58	43	37	89
ENSG00000069998	CECR5	protein_coding	1339	1231	2289	1340	1443	1218	1214	1537	2402
ENSG00000070010	UFD1L	protein_coding	2004	1997	3059	1877	2056	1611	1687	2386	3203
ENSG00000070018	LRP6	protein_coding	0	0	0	0	0	0	0	0	0
ENSG00000070019	GUCY2C	protein_coding	3	3	6	4	4	5	2	3	4
ENSG00000070031	SCT	protein_coding	0	0	0	0	0	0	0	0	0
ENSG00000070047	PHRF1	protein_coding	33	17	5	26	6	3	4	6	28
ENSG00000070061	IKBKAP	protein_coding	3494	2790	5787	4627	5025	4193	2210	2427	3969
ENSG00000070081	NUCB2	protein_coding	3113	4188	4613	2905	3195	2521	2058	2437	3636
ENSG00000070087	PFN2	protein_coding	3739	2984	6397	3920	4542	3586	3344	4577	6064
ENSG00000070159	PTPN3	protein_coding	359	350	533	337	451	308	337	421	618
ENSG00000070182	SPTB	protein_coding	187	176	262	220	261	196	169	164	265
ENSG00000070190	DAPP1	protein_coding	0	0	0	0	0	2	1	2	8
ENSG00000070193	FGF10	protein_coding	0	0	0	0	0	0	0	0	0
ENSG00000070214	SLC44A1	protein_coding	583	413	1011	542	627	464	431	541	760
ENSG00000070269	TMEM260	protein_coding	170	77	193	179	204	159	123	167	186
ENSG00000070366	SMG6	protein_coding	1288	847	2260	1522	1671	1197	1180	1170	1845
ENSG00000070367	EXOC5	protein_coding	912	622	1739	1235	1538	1272	874	1180	1841
ENSG00000070371	CLTCL1	protein_coding	1242	1161	1962	1628	1914	1366	759	844	1324
ENSG00000070388	FGF22	protein_coding	2	9	4	6	17	2	5	10	11
ENSG00000070404	FSTL3	protein_coding	39	23	71	40	35	43	29	29	63
ENSG00000070413	DGCR2	protein_coding	999	1060	1694	1300	1405	1186	985	1075	2018
ENSG00000070423	RNF126	protein_coding	855	701	1342	858	967	789	644	812	1305
ENSG00000070444	MNT	protein_coding	207	203	378	273	313	243	149	200	351
ENSG00000070476	ZXDC	protein_coding	1045	1014	1583	1100	1326	1020	814	1082	1876
ENSG00000070495	JMJD6	protein_coding	1205	961	1775	1258	1369	1082	1258	1572	2507
ENSG00000070501	POLB	protein_coding	520	288	747	771	766	637	571	687	865
ENSG00000070526	ST6GALNAC1	protein_coding	0	0	5	8	10	4	6	6	4
ENSG00000070540	WIPI1	protein_coding	39	57	76	40	45	39	57	65	83
ENSG00000070601	FRMPD1	protein_coding	27	19	34	12	21	20	19	26	26
ENSG00000070610	GBA2	protein_coding	671	560	978	1052	1091	845	544	691	1068
ENSG00000070614	NDST1	protein_coding	501	467	907	813	888	680	448	502	1041
ENSG00000070669	ASNS	protein_coding	3215	2226	4936	5193	6064	5198	2583	2968	5079
ENSG00000070718	AP3M2	protein_coding	645	591	993	642	754	556	584	801	1109
ENSG00000070729	CNGB1	protein_coding	0	2	0	1	0	0	0	2	1
ENSG00000070731	ST6GALNAC2	protein_coding	11	14	15	16	12	11	14	14	14
ENSG00000070748	CHAT	protein_coding	0	0	1	0	0	0	0	0	0
ENSG00000070756	PABPC1	protein_coding	15027	12086	23663	16434	17951	14853	9414	10052	17115
ENSG00000070759	TESK2	protein_coding	56	40	107	66	107	87	53	79	151
ENSG00000070761	CFAP20	protein_coding	1113	700	1725	1196	1445	1124	1255	1692	2431
ENSG00000070770	CSNK2A2	protein_coding	2934	1399	5247	3170	3829	3392	2692	3432	4788
ENSG00000070778	PTPN21	protein_coding	50	70	106	157	113	111	51	50	143
ENSG00000070785	EIF2B3	protein_coding	1882	1329	3427	2260	2689	2383	1443	1808	2864
ENSG00000070808	CAMK2A	protein_coding	0	0	0	0	0	1	0	0	0
ENSG00000070814	TCOF1	protein_coding	3145	2827	4847	3408	3877	3029	2311	2583	3980
ENSG00000070831	CDC42	protein_coding	2154	854	3379	2098	2441	1831	2894	3359	4379
ENSG00000070882	OSBPL3	protein_coding	358	252	646	486	584	487	274	300	486
ENSG00000070886	EPHA8	protein_coding	53	54	110	67	51	36	51	51	87
ENSG00000070915	SLC12A3	protein_coding	0	0	2	0	1	1	0	0	2
ENSG00000070950	RAD18	protein_coding	1451	974	2326	1406	1797	1295	1315	1799	2498
ENSG00000070961	ATP2B1	protein_coding	1887	1515	3048	1990	2320	1950	1147	1485	2203
ENSG00000070985	TRPM5	protein_coding	3	0	4	9	6	6	0	4	7
ENSG00000071051	NCK2	protein_coding	179	130	276	214	292	214	144	210	248
ENSG00000071054	MAP4K4	protein_coding	1364	1408	2142	1840	2007	1696	1041	1283	2240
ENSG00000071073	MGAT4A	protein_coding	187	147	269	210	227	221	138	204	309
ENSG00000071082	RPL31	protein_coding	43710	22192	46522	23481	26541	16291	42595	61521	75126
ENSG00000071127	WDR1	protein_coding	2979	2975	4492	3171	3437	2547	2398	2840	3824
ENSG00000071189	SNX13	protein_coding	271	268	536	413	506	407	322	407	726
ENSG00000071203	MS4A12	protein_coding	0	0	0	0	0	0	0	0	0
ENSG00000071205	ARHGAP10	protein_coding	446	414	662	520	578	391	276	337	538
ENSG00000071242	RPS6KA2	protein_coding	133	133	226	183	213	137	130	140	240
ENSG00000071243	ING3	protein_coding	762	488	1077	838	841	733	726	844	1244
ENSG00000071246	VASH1	protein_coding	58	69	133	121	110	102	74	69	180
ENSG00000071282	LMCD1	protein_coding	174	169	235	124	128	103	153	185	265
ENSG00000071462	WBSCR22	protein_coding	3163	2313	4280	2198	2392	1621	2751	3602	4922
ENSG00000071537	SEL1L	protein_coding	1178	1054	1612	1174	1281	1094	816	1213	1593
ENSG00000071539	TRIP13	protein_coding	1103	1132	1770	1512	1801	1517	1039	1378	2010
ENSG00000071553	ATP6AP1	protein_coding	5539	3527	7415	3217	3720	2679	4079	5568	7613
ENSG00000071564	TCF3	protein_coding	713	640	1284	845	951	677	675	898	1445
ENSG00000071575	TRIB2	protein_coding	59	47	75	77	62	44	42	45	88
ENSG00000071626	DAZAP1	protein_coding	3679	2788	5937	4698	5249	4352	2915	3564	5571
ENSG00000071655	MBD3	protein_coding	929	682	1555	939	1007	793	845	937	2043
ENSG00000071677	PRLH	protein_coding	0	0	0	0	0	0	0	0	0
ENSG00000071794	HLTF	protein_coding	2787	2385	4700	4070	4979	4596	1930	2048	3556
ENSG00000071859	FAM50A	protein_coding	2015	1688	3155	1779	1989	1525	1697	2091	2937
ENSG00000071889	FAM3A	protein_coding	443	405	767	454	507	436	471	534	880
ENSG00000071894	CPSF1	protein_coding	2293	1470	3545	2024	2126	1660	1668	1924	3118
ENSG00000071909	MYO3B	protein_coding	0	2	0	5	1	0	0	1	0
ENSG00000071967	CYBRD1	protein_coding	71	51	75	71	58	44	54	70	85
ENSG00000071991	CDH19	protein_coding	0	0	0	0	0	0	0	0	0
ENSG00000071994	PDCD2	protein_coding	625	618	986	615	661	458	546	784	1165
ENSG00000072041	SLC6A15	protein_coding	2959	2150	4981	3148	3406	2838	2005	2771	3820
ENSG00000072042	RDH11	protein_coding	1602	1356	2398	1445	1533	1166	1389	1860	2707
ENSG00000072062	PRKACA	protein_coding	2314	1582	3473	2069	2337	1963	2123	2969	4067
ENSG00000072071	ADGRL1	protein_coding	686	554	1064	770	683	570	551	635	1279
ENSG00000072080	SPP2	protein_coding	0	0	0	0	0	2	0	3	1
ENSG00000072110	ACTN1	protein_coding	3155	2348	5040	2806	3141	2523	2160	2865	4240
ENSG00000072121	ZFYVE26	protein_coding	486	465	861	944	1068	943	454	590	1017
ENSG00000072133	RPS6KA6	protein_coding	56	45	82	112	157	99	58	70	126
ENSG00000072134	EPN2	protein_coding	915	569	1393	778	791	622	1014	1093	1582
ENSG00000072135	PTPN18	protein_coding	351	299	616	342	369	308	293	367	578
ENSG00000072163	LIMS2	protein_coding	9	7	20	11	8	5	4	4	9
ENSG00000072182	ASIC4	protein_coding	2	9	5	6	3	6	0	9	13
ENSG00000072195	SPEG	protein_coding	59	78	128	65	76	56	80	111	201
ENSG00000072201	LNX1	protein_coding	2	1	0	1	1	0	0	0	2
ENSG00000072210	ALDH3A2	protein_coding	1369	926	2066	1383	1642	1288	1187	1565	2205
ENSG00000072274	TFRC	protein_coding	7721	5131	11995	8432	9899	8494	6107	7146	10882
ENSG00000072310	SREBF1	protein_coding	549	521	1006	598	705	669	366	419	775
ENSG00000072315	TRPC5	protein_coding	0	0	0	0	0	2	0	0	1
ENSG00000072364	AFF4	protein_coding	1295	971	2311	1815	1884	1616	1495	1769	2945
ENSG00000072401	UBE2D1	protein_coding	283	173	474	323	359	333	306	362	562
ENSG00000072415	MPP5	protein_coding	2945	2034	5100	4509	5213	4690	2948	3554	4602
ENSG00000072422	RHOBTB1	protein_coding	110	101	188	150	208	161	97	105	212
ENSG00000072501	SMC1A	protein_coding	21233	17185	30947	29467	29021	21069	11980	11602	17890
ENSG00000072506	HSD17B10	protein_coding	8477	7674	12233	5760	6694	4530	9112	12379	17486
ENSG00000072518	MARK2	protein_coding	954	898	1459	1079	1213	871	760	905	1486
ENSG00000072571	HMMR	protein_coding	1776	1632	2738	2408	2547	2162	1357	1367	2316
ENSG00000072609	CHFR	protein_coding	452	324	760	536	578	415	418	448	779
ENSG00000072657	TRHDE	protein_coding	2	2	5	5	4	11	7	4	7
ENSG00000072682	P4HA2	protein_coding	854	627	1231	613	632	538	497	573	897
ENSG00000072694	FCGR2B	protein_coding	0	0	0	1	0	0	0	0	1
ENSG00000072736	NFATC3	protein_coding	733	350	978	792	897	694	673	872	1119
ENSG00000072756	TRNT1	protein_coding	518	306	782	608	728	579	434	556	649
ENSG00000072778	ACADVL	protein_coding	1129	1056	1961	1186	1319	912	980	1216	1857
ENSG00000072786	STK10	protein_coding	511	551	754	580	607	434	385	442	811
ENSG00000072803	FBXW11	protein_coding	1778	1461	2843	2243	2370	1924	1427	1959	2839
ENSG00000072818	ACAP1	protein_coding	8	15	15	27	19	17	15	15	30
ENSG00000072832	CRMP1	protein_coding	79	98	134	67	77	74	59	52	108
ENSG00000072840	EVC	protein_coding	73	64	134	125	167	86	74	72	185
ENSG00000072849	DERL2	protein_coding	961	868	1658	1236	1445	1301	996	1441	1932
ENSG00000072858	SIDT1	protein_coding	46	23	48	38	24	26	28	33	49
ENSG00000072864	NDE1	protein_coding	0	0	0	0	0	0	0	1	0
ENSG00000072952	MRVI1	protein_coding	0	1	3	2	6	3	0	5	0
ENSG00000072954	TMEM38A	protein_coding	63	37	59	37	40	39	57	56	127
ENSG00000072958	AP1M1	protein_coding	1478	1158	2364	1349	1623	1184	1283	1729	2403
ENSG00000073008	PVR	protein_coding	731	668	993	649	759	568	521	641	1118
ENSG00000073050	XRCC1	protein_coding	483	440	678	443	518	427	285	292	523
ENSG00000073060	SCARB1	protein_coding	1957	1344	3001	1825	1987	1495	1178	1693	2435
ENSG00000073067	CYP2W1	protein_coding	1	2	2	5	4	2	2	2	3
ENSG00000073111	MCM2	protein_coding	21478	16651	29455	22371	22337	16539	10791	6810	15162
ENSG00000073146	MOV10L1	protein_coding	0	0	0	1	0	0	2	0	1
ENSG00000073150	PANX2	protein_coding	41	43	73	40	55	37	49	41	86
ENSG00000073169	SELENOO	protein_coding	337	255	544	383	426	339	326	345	656
ENSG00000073282	TP63	protein_coding	0	0	0	0	0	0	0	0	0
ENSG00000073331	ALPK1	protein_coding	77	76	101	107	93	100	79	63	104
ENSG00000073350	LLGL2	protein_coding	143	131	172	136	189	146	120	138	243
ENSG00000073417	PDE8A	protein_coding	288	179	377	380	428	352	235	315	490
ENSG00000073464	CLCN4	protein_coding	0	4	1	3	3	1	0	3	2
ENSG00000073536	NLE1	protein_coding	1059	896	1783	1007	1232	934	864	1186	1680
ENSG00000073578	SDHA	protein_coding	2120	1616	3941	2699	3342	2539	2436	2810	3925
ENSG00000073584	SMARCE1	protein_coding	187	79	303	231	272	229	156	204	292
ENSG00000073598	FNDC8	protein_coding	3	5	6	0	3	4	1	3	8
ENSG00000073605	GSDMB	protein_coding	19	35	47	68	61	47	22	32	85
ENSG00000073614	KDM5A	protein_coding	5755	5000	9906	6338	7228	6123	6211	7230	12714
ENSG00000073670	ADAM11	protein_coding	114	87	166	115	130	100	69	79	208
ENSG00000073711	PPP2R3A	protein_coding	117	78	189	169	233	192	108	124	222
ENSG00000073712	FERMT2	protein_coding	1510	1199	2526	1983	2199	1892	1371	1415	2210
ENSG00000073734	ABCB11	protein_coding	0	0	0	0	0	0	0	0	0
ENSG00000073737	DHRS9	protein_coding	1	2	3	10	3	2	0	3	3
ENSG00000073754	CD5L	protein_coding	0	0	0	0	0	0	3	0	0
ENSG00000073756	PTGS2	protein_coding	51	66	106	65	80	48	71	61	120
ENSG00000073792	IGF2BP2	protein_coding	634	455	854	633	759	615	427	629	870
ENSG00000073803	MAP3K13	protein_coding	535	266	1130	959	1240	1025	822	808	1543
ENSG00000073849	ST6GAL1	protein_coding	94	86	161	102	121	101	71	107	146
ENSG00000073861	TBX21	protein_coding	2	4	7	1	2	8	10	2	6
ENSG00000073905	VDAC1P1	processed_pseudogene	245	149	392	348	422	389	208	251	403
ENSG00000073910	FRY	protein_coding	75	77	105	96	122	108	55	70	94
ENSG00000073921	PICALM	protein_coding	1555	1026	2447	1641	1909	1650	1425	1804	2467
ENSG00000073969	NSF	protein_coding	0	4	11	0	0	1	2	0	1
ENSG00000074047	GLI2	protein_coding	89	55	160	107	112	100	61	76	138
ENSG00000074054	CLASP1	protein_coding	2518	1754	4260	2604	3044	2690	1889	1995	3187
ENSG00000074071	MRPS34	protein_coding	2969	2417	4386	2005	2291	1582	2409	3197	4687
ENSG00000074181	NOTCH3	protein_coding	712	714	1158	673	737	558	480	570	1061
ENSG00000074201	CLNS1A	protein_coding	4273	4132	6825	5151	5681	4401	4008	5429	7394
ENSG00000074211	PPP2R2C	protein_coding	27	26	30	39	46	31	22	24	66
ENSG00000074219	TEAD2	protein_coding	200	174	312	252	302	235	160	191	389
ENSG00000074266	EED	protein_coding	1542	978	2605	1801	2151	1558	1723	2006	2805
ENSG00000074276	CDHR2	protein_coding	9	7	15	21	25	14	12	26	21
ENSG00000074317	SNCB	protein_coding	88	88	145	81	95	77	101	156	167
ENSG00000074319	TSG101	protein_coding	1686	936	2680	1784	2018	1658	1411	1789	2470
ENSG00000074356	NCBP3	protein_coding	3022	2780	4917	4149	4233	3303	2972	3656	5915
ENSG00000074370	ATP2A3	protein_coding	420	375	636	260	296	231	332	409	592
ENSG00000074410	CA12	protein_coding	25	16	49	25	36	35	33	37	51
ENSG00000074416	MGLL	protein_coding	16	22	24	12	20	15	17	15	22
ENSG00000074527	NTN4	protein_coding	28	23	63	24	30	23	16	21	65
ENSG00000074582	BCS1L	protein_coding	970	766	1459	1242	1345	1000	1025	1233	1823
ENSG00000074590	NUAK1	protein_coding	134	140	208	224	205	204	101	146	230
ENSG00000074603	DPP8	protein_coding	554	376	878	645	806	661	429	586	1045
ENSG00000074621	SLC24A1	protein_coding	102	199	186	193	157	137	106	129	242
ENSG00000074657	ZNF532	protein_coding	77	35	110	84	122	80	76	61	157
ENSG00000074660	SCARF1	protein_coding	0	0	0	0	0	0	0	0	0
ENSG00000074695	LMAN1	protein_coding	5288	4357	7977	5107	5824	4775	3406	4327	5955
ENSG00000074696	HACD3	protein_coding	33355	30712	42781	26760	27373	19136	27792	34284	46188
ENSG00000074706	IPCEF1	protein_coding	8	2	7	8	12	12	11	15	22
ENSG00000074755	ZZEF1	protein_coding	1514	1257	2366	2244	2593	1845	1087	1407	2433
ENSG00000074771	NOX3	protein_coding	0	0	0	0	0	0	0	0	0
ENSG00000074800	ENO1	protein_coding	140282	150253	212723	102195	114860	86133	105089	144539	196238
ENSG00000074803	SLC12A1	protein_coding	2	1	0	0	0	0	0	0	0
ENSG00000074842	MYDGF	protein_coding	935	740	1588	811	866	684	866	1316	1775
ENSG00000074855	ANO8	protein_coding	311	255	609	320	298	232	265	392	632
ENSG00000074935	TUBE1	protein_coding	492	362	725	559	632	548	497	643	1003
ENSG00000074964	ARHGEF10L	protein_coding	71	54	101	72	90	55	48	48	95
ENSG00000074966	TXK	protein_coding	5	3	1	4	3	5	1	6	3
ENSG00000075035	WSCD2	protein_coding	0	0	0	0	0	0	0	0	0
ENSG00000075043	KCNQ2	protein_coding	26	33	49	38	34	21	20	27	64
ENSG00000075073	TACR2	protein_coding	0	0	1	1	0	3	1	0	2
ENSG00000075089	ACTR6	protein_coding	690	444	1000	959	1189	968	672	704	1150
ENSG00000075131	TIPIN	protein_coding	2953	2059	4664	3886	4539	3877	2726	3557	5465
ENSG00000075142	SRI	protein_coding	2003	1327	3294	1574	2027	1485	1282	1992	2733
ENSG00000075151	EIF4G3	protein_coding	3320	3147	5364	4010	4411	3684	2183	2283	4043
ENSG00000075188	NUP37	protein_coding	1829	988	2876	2943	3139	2885	1516	1959	3086
ENSG00000075213	SEMA3A	protein_coding	205	135	313	164	155	114	113	118	195
ENSG00000075218	GTSE1	protein_coding	1424	1237	2162	1604	1733	1240	1500	1724	2552
ENSG00000075223	SEMA3C	protein_coding	1474	804	1996	1167	1256	1018	736	981	1532
ENSG00000075234	TTC38	protein_coding	344	299	647	430	537	312	339	404	569
ENSG00000075239	ACAT1	protein_coding	3017	2581	4661	4248	5045	4353	2873	3259	4901
ENSG00000075240	GRAMD4	protein_coding	179	152	253	168	205	183	164	164	290
ENSG00000075275	CELSR1	protein_coding	412	299	641	541	609	551	291	322	672
ENSG00000075290	WNT8B	protein_coding	3	3	8	2	12	5	7	10	13
ENSG00000075292	ZNF638	protein_coding	2759	2469	4843	4128	4688	3900	2300	2293	4082
ENSG00000075303	SLC25A40	protein_coding	263	184	496	346	461	413	256	327	495
ENSG00000075336	TIMM21	protein_coding	427	402	718	424	552	443	521	660	940
ENSG00000075340	ADD2	protein_coding	762	624	1594	1147	1586	1153	808	1105	1583
ENSG00000075388	FGF4	protein_coding	0	0	0	0	0	1	0	0	0
ENSG00000075391	RASAL2	protein_coding	392	398	671	547	589	469	377	356	708
ENSG00000075399	VPS9D1	protein_coding	27	33	51	48	54	46	19	21	65
ENSG00000075407	ZNF37A	protein_coding	59	61	132	122	192	143	93	80	160
ENSG00000075413	MARK3	protein_coding	1047	840	1546	1378	1549	1116	960	1097	1720
ENSG00000075415	SLC25A3	protein_coding	5114	3375	8649	5584	6913	5761	5218	6857	9714
ENSG00000075420	FNDC3B	protein_coding	320	300	477	418	389	330	304	315	593
ENSG00000075426	FOSL2	protein_coding	67	73	131	118	118	85	72	75	178
ENSG00000075429	CACNG5	protein_coding	2	3	6	0	4	3	3	3	3
ENSG00000075461	CACNG4	protein_coding	4	4	11	5	2	3	2	3	1
ENSG00000075539	FRYL	protein_coding	548	369	972	912	1029	811	392	479	817
ENSG00000075568	TMEM131	protein_coding	844	542	1494	1178	1386	1113	543	696	931
ENSG00000075618	FSCN1	protein_coding	569	463	987	692	644	575	570	658	1010
ENSG00000075624	ACTB	protein_coding	57981	40148	88178	37483	39032	30987	51618	79294	93554
ENSG00000075643	MOCOS	protein_coding	180	143	245	227	291	230	146	180	232
ENSG00000075651	PLD1	protein_coding	255	157	348	331	342	241	217	206	379
ENSG00000075673	ATP12A	protein_coding	7	6	24	9	9	9	10	9	20
ENSG00000075702	WDR62	protein_coding	763	859	1459	1276	1493	1050	751	766	1433
ENSG00000075711	DLG1	protein_coding	683	515	1036	932	1100	861	577	681	1013
ENSG00000075785	RAB7A	protein_coding	4366	2914	6322	4964	5570	4369	5189	6416	9130
ENSG00000075790	BCAP29	protein_coding	931	693	1742	1342	1362	1376	966	1153	1596
ENSG00000075826	SEC31B	protein_coding	52	78	117	150	212	171	111	87	169
ENSG00000075856	SART3	protein_coding	2242	1936	3495	2376	2551	2058	1827	2148	3518
ENSG00000075884	ARHGAP15	protein_coding	0	0	0	0	0	0	0	0	0
ENSG00000075886	TUBA3D	protein_coding	2	3	6	4	2	2	0	1	4
ENSG00000075891	PAX2	protein_coding	23	27	35	29	35	31	14	28	56
ENSG00000075914	EXOSC7	protein_coding	1887	1329	2704	1588	1582	1249	1543	1859	2740
ENSG00000075945	KIFAP3	protein_coding	1647	1234	2659	2219	2442	2179	1016	960	1596
ENSG00000075975	MKRN2	protein_coding	1159	802	1697	1268	1506	1064	1159	1573	2122
ENSG00000076003	MCM6	protein_coding	8101	5927	13068	9746	10631	9307	6071	6773	9644
ENSG00000076043	REXO2	protein_coding	583	395	869	568	615	477	565	726	1020
ENSG00000076053	RBM7	protein_coding	145	135	191	165	171	133	181	207	249
ENSG00000076067	RBMS2	protein_coding	82	50	91	129	148	138	85	104	201
ENSG00000076108	BAZ2A	protein_coding	2664	2273	3754	2964	3349	2319	1827	2493	4005
ENSG00000076201	PTPN23	protein_coding	573	539	969	719	801	659	445	510	867
ENSG00000076242	MLH1	protein_coding	1	0	2	1	2	1	2	3	3
ENSG00000076248	UNG	protein_coding	1883	1635	2831	2162	2430	1858	2114	2567	3345
ENSG00000076258	FMO4	protein_coding	67	49	79	49	53	62	29	45	72
ENSG00000076321	KLHL20	protein_coding	220	193	376	321	458	337	304	309	555
ENSG00000076344	RGS11	protein_coding	0	4	3	1	3	3	2	1	4
ENSG00000076351	SLC46A1	protein_coding	91	61	159	105	129	111	74	83	118
ENSG00000076356	PLXNA2	protein_coding	281	215	389	272	258	200	176	234	315
ENSG00000076382	SPAG5	protein_coding	1652	1251	2563	2086	2121	1906	1375	1709	2265
ENSG00000076513	ANKRD13A	protein_coding	471	437	714	581	758	567	543	673	1076
ENSG00000076554	TPD52	protein_coding	107	114	189	132	152	135	85	117	164
ENSG00000076555	ACACB	protein_coding	202	206	325	329	421	269	235	247	479
ENSG00000076604	TRAF4	protein_coding	291	297	570	286	335	193	294	400	528
ENSG00000076641	PAG1	protein_coding	255	199	457	298	278	271	183	253	342
ENSG00000076650	GPATCH1	protein_coding	317	307	450	383	474	380	292	307	542
ENSG00000076662	ICAM3	protein_coding	0	0	0	3	1	0	1	0	2
ENSG00000076685	NT5C2	protein_coding	645	542	970	1065	1313	1095	494	615	1055
ENSG00000076706	MCAM	protein_coding	589	365	937	446	491	371	339	472	658
ENSG00000076716	GPC4	protein_coding	3792	3258	5075	2452	2642	1958	1900	2262	2954
ENSG00000076770	MBNL3	protein_coding	102	96	216	168	253	200	112	125	236
ENSG00000076826	CAMSAP3	protein_coding	223	195	366	222	273	215	178	222	322
ENSG00000076864	RAP1GAP	protein_coding	85	82	143	106	118	105	64	93	175
ENSG00000076924	XAB2	protein_coding	1006	712	1475	832	913	781	583	715	1036
ENSG00000076928	ARHGEF1	protein_coding	450	310	755	350	418	317	296	343	536
ENSG00000076944	STXBP2	protein_coding	171	213	281	246	242	176	182	217	349
ENSG00000076984	MAP2K7	protein_coding	644	541	1108	930	1024	817	597	610	1049
ENSG00000077009	NMRK2	protein_coding	15	8	5	15	20	8	5	7	16
ENSG00000077044	DGKD	protein_coding	351	324	645	596	581	475	342	434	732
ENSG00000077063	CTTNBP2	protein_coding	310	368	635	372	387	326	464	434	852
ENSG00000077080	ACTL6B	protein_coding	3	6	14	11	6	5	1	3	5
ENSG00000077092	RARB	protein_coding	329	256	468	360	341	276	247	294	432
ENSG00000077097	TOP2B	protein_coding	6423	4704	9837	8441	10213	8770	4368	5362	8598
ENSG00000077147	TM9SF3	protein_coding	6027	4383	8578	4917	5778	4321	3479	5016	6807
ENSG00000077150	NFKB2	protein_coding	419	465	546	443	490	344	307	303	485
ENSG00000077152	UBE2T	protein_coding	2778	2432	4909	3218	3810	3300	2627	3616	4978
ENSG00000077157	PPP1R12B	protein_coding	174	134	226	220	230	177	170	166	305
ENSG00000077232	DNAJC10	protein_coding	1575	1332	2592	1791	2202	1739	1074	1338	1931
ENSG00000077235	GTF3C1	protein_coding	5380	4705	8502	6500	6827	5610	2994	2779	5590
ENSG00000077238	IL4R	protein_coding	147	72	182	87	92	82	90	121	177
ENSG00000077254	USP33	protein_coding	2922	2363	4868	3837	4568	3954	2039	2456	3793
ENSG00000077264	PAK3	protein_coding	18	18	30	29	33	26	17	18	34
ENSG00000077274	CAPN6	protein_coding	3	2	11	2	7	6	7	1	3
ENSG00000077279	DCX	protein_coding	4	0	4	0	0	1	4	1	3
ENSG00000077312	SNRPA	protein_coding	2834	1652	4109	2356	2432	1812	2713	3315	4202
ENSG00000077327	SPAG6	protein_coding	3	6	7	8	7	7	7	12	12
ENSG00000077348	EXOSC5	protein_coding	741	608	1184	573	631	439	721	1028	1459
ENSG00000077380	DYNC1I2	protein_coding	766	418	1098	1029	1369	1007	509	575	904
ENSG00000077420	APBB1IP	protein_coding	3	4	0	0	0	1	0	1	0
ENSG00000077454	LRCH4	protein_coding	161	120	251	169	193	116	111	163	254
ENSG00000077458	FAM76B	protein_coding	287	330	521	453	597	462	373	531	787
ENSG00000077463	SIRT6	protein_coding	344	323	596	363	390	271	308	397	759
ENSG00000077498	TYR	protein_coding	0	0	0	0	0	0	0	0	0
ENSG00000077514	POLD3	protein_coding	957	666	1464	1943	2244	1575	968	1112	1622
ENSG00000077522	ACTN2	protein_coding	108	102	171	198	164	154	133	154	300
ENSG00000077549	CAPZB	protein_coding	5685	5265	8716	6468	7293	5480	5150	6839	9654
ENSG00000077585	GPR137B	protein_coding	50	35	78	57	52	39	30	40	60
ENSG00000077616	NAALAD2	protein_coding	33	28	25	33	34	39	17	22	39
ENSG00000077684	JADE1	protein_coding	600	538	1008	736	779	576	532	650	1060
ENSG00000077713	SLC25A43	protein_coding	21	27	46	35	26	24	26	29	62
ENSG00000077721	UBE2A	protein_coding	3159	2320	5249	3141	3579	2898	4431	6173	8207
ENSG00000077782	FGFR1	protein_coding	793	624	1235	837	855	630	712	819	1413
ENSG00000077800	FKBP6	protein_coding	1	0	0	0	0	0	0	0	0
ENSG00000077935	SMC1B	protein_coding	7	5	7	5	11	13	4	7	5
ENSG00000077942	FBLN1	protein_coding	1575	1392	2121	770	796	546	1025	1311	1833
ENSG00000077943	ITGA8	protein_coding	246	250	382	270	252	165	159	257	312
ENSG00000077984	CST7	protein_coding	6	5	2	4	1	2	6	8	7
ENSG00000078018	MAP2	protein_coding	22	7	37	18	16	11	9	26	20
ENSG00000078043	PIAS2	protein_coding	347	328	671	524	562	509	413	513	791
ENSG00000078053	AMPH	protein_coding	205	131	314	223	232	254	105	166	284
ENSG00000078061	ARAF	protein_coding	543	339	785	636	637	492	473	534	888
ENSG00000078070	MCCC1	protein_coding	213	173	387	373	452	436	227	247	438
ENSG00000078081	LAMP3	protein_coding	38	27	84	45	63	51	34	56	59
ENSG00000078098	FAP	protein_coding	0	0	0	0	0	0	0	0	0
ENSG00000078114	NEBL	protein_coding	131	103	261	174	179	152	110	154	171
ENSG00000078124	ACER3	protein_coding	247	104	397	237	320	273	190	230	316
ENSG00000078140	UBE2K	protein_coding	2337	2234	3679	2309	2540	1829	2243	2761	3475
ENSG00000078142	PIK3C3	protein_coding	1466	549	2170	1849	2179	1371	1009	1067	1716
ENSG00000078177	N4BP2	protein_coding	401	367	628	597	758	610	304	371	668
ENSG00000078237	TIGAR	protein_coding	1212	1015	1947	1551	1825	1484	1509	1889	2473
ENSG00000078246	TULP3	protein_coding	1390	1108	2395	1785	2348	1701	1939	2191	2832
ENSG00000078269	SYNJ2	protein_coding	261	266	469	359	331	338	255	303	508
ENSG00000078295	ADCY2	protein_coding	0	0	0	0	0	0	0	0	0
ENSG00000078304	PPP2R5C	protein_coding	1221	1007	1604	1233	1387	1125	1157	1471	2091
ENSG00000078319	PMS2P1	unprocessed_pseudogene	43	25	46	56	79	50	35	42	85
ENSG00000078328	RBFOX1	protein_coding	0	0	0	0	1	0	0	0	0
ENSG00000078369	GNB1	protein_coding	4338	2944	7344	6135	6857	5400	4366	5561	8153
ENSG00000078399	HOXA9	protein_coding	487	361	749	555	553	414	575	710	1254
ENSG00000078401	EDN1	protein_coding	6	2	6	2	5	3	1	4	8
ENSG00000078403	MLLT10	protein_coding	343	326	623	628	721	567	414	400	674
ENSG00000078487	ZCWPW1	protein_coding	53	36	78	52	43	44	44	44	72
ENSG00000078549	ADCYAP1R1	protein_coding	92	58	144	59	66	51	48	68	75
ENSG00000078579	FGF20	protein_coding	4	2	4	1	0	0	3	5	8
ENSG00000078589	P2RY10	protein_coding	0	0	0	0	0	0	0	0	0
ENSG00000078596	ITM2A	protein_coding	12	7	24	5	5	7	3	8	5
ENSG00000078618	NRDC	protein_coding	2742	2871	4739	4257	4965	4534	2285	2662	4239
ENSG00000078668	VDAC3	protein_coding	3721	2374	6480	5616	7272	6072	3503	4371	6366
ENSG00000078674	PCM1	protein_coding	3006	3718	5221	4468	5607	4634	2555	2690	4864
ENSG00000078687	TNRC6C	protein_coding	333	342	625	474	407	385	295	385	729
ENSG00000078699	CBFA2T2	protein_coding	583	336	778	594	663	535	616	687	951
ENSG00000078725	BRINP1	protein_coding	0	0	0	0	0	0	0	0	0
ENSG00000078747	ITCH.1	protein_coding	96	87	155	215	199	196	90	110	205
ENSG00000078795	PKD2L2	protein_coding	4	14	5	10	5	12	9	5	16
ENSG00000078804	TP53INP2	protein_coding	61	69	111	137	152	112	76	78	144
ENSG00000078808	SDF4	protein_coding	2432	1699	3474	1431	1465	1106	1750	2390	3315
ENSG00000078814	MYH7B	protein_coding	4	14	28	14	19	6	8	17	28
ENSG00000078898	BPIFB2	protein_coding	0	0	0	0	0	0	0	0	0
ENSG00000078900	TP73	protein_coding	127	107	237	130	161	147	97	162	212
ENSG00000078902	TOLLIP	protein_coding	1110	634	1371	894	822	498	1042	1519	1815
ENSG00000078967	UBE2D4	protein_coding	27	33	73	42	54	45	31	61	60
ENSG00000079101	CLUL1	protein_coding	6	8	21	14	9	5	13	16	20
ENSG00000079102	RUNX1T1	protein_coding	286	163	476	329	362	304	278	316	519
ENSG00000079112	CDH17	protein_coding	0	0	1	2	0	0	1	0	0
ENSG00000079134	THOC1	protein_coding	1030	1097	1517	1158	1352	1074	828	956	1325
ENSG00000079150	FKBP7	protein_coding	1360	672	1770	1090	1122	911	1098	1458	1693
ENSG00000079156	OSBPL6	protein_coding	280	245	426	446	505	442	203	236	472
ENSG00000079215	SLC1A3	protein_coding	717	625	1044	750	851	658	453	514	696
ENSG00000079246	XRCC5	protein_coding	45508	30170	71411	51130	59587	41231	39721	38475	63779
ENSG00000079257	LXN	protein_coding	61	48	62	58	53	62	50	64	60
ENSG00000079263	SP140	protein_coding	0	0	0	0	0	0	0	0	0
ENSG00000079277	MKNK1	protein_coding	399	393	661	469	558	448	362	459	721
ENSG00000079308	TNS1	protein_coding	29	14	31	9	20	13	11	11	36
ENSG00000079313	REXO1	protein_coding	339	323	568	402	424	393	287	365	632
ENSG00000079332	SAR1A	protein_coding	4154	3624	7029	3744	4658	3843	4135	5767	7995
ENSG00000079335	CDC14A	protein_coding	106	124	144	140	136	117	82	102	155
ENSG00000079337	RAPGEF3	protein_coding	8	10	24	11	9	9	8	5	21
ENSG00000079385	CEACAM1	protein_coding	0	6	0	1	10	4	2	1	3
ENSG00000079387	SENP1	protein_coding	865	531	1118	956	1063	877	820	936	1394
ENSG00000079393	DUSP13	protein_coding	0	0	1	0	0	1	1	3	8
ENSG00000079432	CIC	protein_coding	302	296	546	503	544	424	269	343	570
ENSG00000079435	LIPE	protein_coding	74	69	105	102	111	91	82	90	140
ENSG00000079459	FDFT1	protein_coding	6367	3530	9410	4811	5294	4193	4532	5551	7626
ENSG00000079462	PAFAH1B3	protein_coding	475	337	704	363	376	267	387	548	788
ENSG00000079482	OPHN1	protein_coding	178	108	272	171	213	223	138	180	255
ENSG00000079557	AFM	protein_coding	0	0	0	0	0	0	0	0	0
ENSG00000079616	KIF22	protein_coding	2269	1890	3008	2376	2472	1914	1757	2027	3034
ENSG00000079689	SCGN	protein_coding	1	0	0	1	1	0	0	1	1
ENSG00000079691	CARMIL1	protein_coding	235	171	442	363	470	333	194	176	301
ENSG00000079739	PGM1	protein_coding	4008	2479	5821	3497	4036	3137	2778	3359	4523
ENSG00000079785	DDX1	protein_coding	7639	5485	12481	10455	13216	11215	4427	4874	7302
ENSG00000079805	DNM2	protein_coding	2918	2215	4345	3233	3628	2757	2551	3037	4683
ENSG00000079819	EPB41L2	protein_coding	4121	3002	6359	4779	5226	4377	3436	4238	5695
ENSG00000079841	RIMS1	protein_coding	6	3	13	7	7	14	2	2	19
ENSG00000079931	MOXD1	protein_coding	295	183	395	241	334	284	182	269	346
ENSG00000079950	STX7	protein_coding	362	243	623	671	710	620	320	498	712
ENSG00000079974	RABL2B	protein_coding	105	86	163	155	114	98	81	121	164
ENSG00000079999	KEAP1	protein_coding	724	648	1225	985	1117	902	646	697	1243
ENSG00000080007	DDX43	protein_coding	0	0	1	0	1	2	0	4	0
ENSG00000080031	PTPRH	protein_coding	4	4	15	11	6	7	3	2	16
ENSG00000080166	DCT	protein_coding	0	0	0	7	3	4	4	10	12
ENSG00000080189	SLC35C2	protein_coding	537	396	1006	554	658	518	531	618	1096
ENSG00000080200	CRYBG3	protein_coding	620	404	880	941	1144	866	522	597	837
ENSG00000080224	EPHA6	protein_coding	120	113	146	128	125	112	62	111	161
ENSG00000080293	SCTR	protein_coding	1	0	6	1	0	0	1	0	0
ENSG00000080298	RFX3	protein_coding	206	190	257	215	196	160	198	268	345
ENSG00000080345	RIF1	protein_coding	4968	4021	7722	5773	6962	5554	3478	4098	6359
ENSG00000080371	RAB21	protein_coding	750	573	1236	1223	1458	1217	755	1032	1546
ENSG00000080493	SLC4A4	protein_coding	80	83	137	95	84	73	59	74	147
ENSG00000080503	SMARCA2	protein_coding	810	717	1224	1083	1172	922	704	859	1255
ENSG00000080511	RDH8	protein_coding	1	0	0	0	0	0	0	0	0
ENSG00000080546	SESN1	protein_coding	300	172	449	473	550	428	277	413	514
ENSG00000080561	MID2	protein_coding	282	211	492	289	378	297	254	255	491
ENSG00000080572	PIH1D3	protein_coding	0	0	4	0	1	2	0	1	1
ENSG00000080573	COL5A3	protein_coding	2	4	1	2	2	2	0	0	4
ENSG00000080603	SRCAP	protein_coding	238	220	354	271	326	218	210	263	434
ENSG00000080608	PUM3	protein_coding	1354	1057	2599	1973	2207	1991	1102	1214	1827
ENSG00000080618	CPB2	protein_coding	1	0	0	1	0	0	2	0	0
ENSG00000080644	CHRNA3	protein_coding	201	134	300	161	166	108	147	199	253
ENSG00000080709	KCNN2	protein_coding	4	10	12	5	10	9	3	9	9
ENSG00000080802	CNOT4	protein_coding	935	680	1560	1001	1122	839	786	1041	1544
ENSG00000080815	PSEN1	protein_coding	992	820	1329	891	1038	761	841	941	1550
ENSG00000080819	CPOX	protein_coding	2376	1990	3620	2244	2563	2166	1656	2203	3161
ENSG00000080822	CLDND1	protein_coding	534	322	678	497	540	454	372	485	690
ENSG00000080823	MOK	protein_coding	187	123	274	225	262	198	144	151	361
ENSG00000080824	HSP90AA1	protein_coding	270458	169814	380690	279522	259327	169068	228765	318692	331987
ENSG00000080839	RBL1	protein_coding	1374	1422	2438	2283	2823	2443	1317	1579	2934
ENSG00000080845	DLGAP4	protein_coding	248	230	422	371	386	307	210	267	394
ENSG00000080854	IGSF9B	protein_coding	86	54	148	127	168	89	80	101	179
ENSG00000080910	CFHR2	protein_coding	0	0	0	0	0	0	0	0	0
ENSG00000080947	CROCCP3	transcribed_unprocessed_pseudogene	35	25	66	57	45	44	41	45	105
ENSG00000080986	NDC80	protein_coding	1258	1253	2067	1490	1648	1452	1005	1093	1625
ENSG00000081014	AP4E1	protein_coding	167	137	292	362	423	332	154	210	341
ENSG00000081019	RSBN1	protein_coding	779	602	1308	784	916	732	667	828	1368
ENSG00000081026	MAGI3	protein_coding	876	690	1474	954	962	790	945	1147	1594
ENSG00000081041	CXCL2	protein_coding	0	2	5	5	1	0	1	2	2
ENSG00000081051	AFP	protein_coding	0	0	0	0	2	0	0	0	0
ENSG00000081052	COL4A4	protein_coding	50	27	72	44	43	26	27	41	50
ENSG00000081059	TCF7	protein_coding	59	68	74	88	73	69	43	69	126
ENSG00000081087	OSTM1	protein_coding	296	226	467	320	327	290	187	324	404
ENSG00000081138	CDH7	protein_coding	3	0	0	2	5	0	0	5	3
ENSG00000081148	IMPG2	protein_coding	2	2	1	9	3	6	4	3	9
ENSG00000081154	PCNP	protein_coding	860	806	1347	1015	1131	899	845	1018	1551
ENSG00000081177	EXD2	protein_coding	306	333	542	388	487	379	284	320	512
ENSG00000081181	ARG2	protein_coding	512	292	719	472	580	468	531	717	963
ENSG00000081189	MEF2C	protein_coding	313	289	567	419	430	382	297	392	516
ENSG00000081237	PTPRC	protein_coding	0	0	0	0	0	0	0	0	0
ENSG00000081248	CACNA1S	protein_coding	0	3	6	2	1	0	1	0	0
ENSG00000081277	PKP1	protein_coding	0	0	0	0	0	0	0	0	0
ENSG00000081307	UBA5	protein_coding	1369	1088	2295	1706	2047	1839	1127	1389	1956
ENSG00000081320	STK17B	protein_coding	399	246	702	479	570	480	407	464	749
ENSG00000081377	CDC14B	protein_coding	102	141	278	154	218	196	138	214	391
ENSG00000081386	ZNF510	protein_coding	33	24	66	71	82	88	40	67	98
ENSG00000081479	LRP2	protein_coding	1788	1417	2713	1658	2010	1535	827	969	1572
ENSG00000081665	ZNF506	protein_coding	12	6	20	18	12	25	11	12	38
ENSG00000081692	JMJD4	protein_coding	220	198	425	231	271	202	190	205	355
ENSG00000081721	DUSP12	protein_coding	229	171	417	313	367	299	223	281	434
ENSG00000081760	AACS	protein_coding	818	573	1086	776	802	623	667	760	1034
ENSG00000081791	KIAA0141	protein_coding	384	218	636	340	399	308	329	437	628
ENSG00000081800	SLC13A1	protein_coding	0	0	0	0	0	0	0	0	0
ENSG00000081803	CADPS2	protein_coding	255	247	425	440	486	389	252	274	427
ENSG00000081818	PCDHB4	protein_coding	0	0	0	0	0	0	0	0	0
ENSG00000081842	PCDHA6	protein_coding	0	0	1	0	0	0	0	0	0
ENSG00000081853	PCDHGA2	protein_coding	0	0	1	1	1	2	0	2	1
ENSG00000081870	HSPB11	protein_coding	1030	869	1571	1464	1779	1580	1109	1387	2271
ENSG00000081913	PHLPP1	protein_coding	337	273	520	387	493	408	308	329	529
ENSG00000081923	ATP8B1	protein_coding	14	5	20	25	32	15	12	18	20
ENSG00000081985	IL12RB2	protein_coding	21	9	32	46	45	26	27	40	43
ENSG00000082014	SMARCD3	protein_coding	281	190	485	294	290	271	219	337	554
ENSG00000082068	WDR70	protein_coding	997	884	1605	1320	1522	1354	1004	1300	2008
ENSG00000082074	FYB	protein_coding	0	1	0	0	0	0	0	0	0
ENSG00000082126	MPP4	protein_coding	3	1	2	3	5	4	0	2	5
ENSG00000082146	STRADB	protein_coding	104	65	206	166	158	137	105	151	207
ENSG00000082153	BZW1	protein_coding	2108	1457	3344	2170	2874	2263	2068	2549	3602
ENSG00000082175	PGR	protein_coding	1	0	0	0	2	0	0	0	1
ENSG00000082196	C1QTNF3	protein_coding	0	2	2	0	1	0	0	1	0
ENSG00000082212	ME2	protein_coding	1099	733	1679	1462	1767	1380	853	1030	1391
ENSG00000082213	C5orf22	protein_coding	386	380	714	664	768	628	366	551	712
ENSG00000082258	CCNT2	protein_coding	342	243	626	482	660	562	350	427	789
ENSG00000082269	FAM135A	protein_coding	290	270	454	458	578	408	268	296	542
ENSG00000082293	COL19A1	protein_coding	12	22	44	30	23	17	17	16	30
ENSG00000082397	EPB41L3	protein_coding	1321	842	2097	1521	1714	1430	1027	1165	1725
ENSG00000082438	COBLL1	protein_coding	273	199	494	348	431	351	250	310	435
ENSG00000082458	DLG3	protein_coding	372	297	527	365	429	313	372	347	597
ENSG00000082482	KCNK2	protein_coding	0	1	0	0	0	0	0	0	0
ENSG00000082497	SERTAD4	protein_coding	0	0	0	0	0	0	0	3	0
ENSG00000082512	TRAF5	protein_coding	90	61	225	126	156	153	64	118	165
ENSG00000082515	MRPL22	protein_coding	1303	754	1867	1157	1413	1109	1331	1834	2197
ENSG00000082516	GEMIN5	protein_coding	1870	1652	3026	2830	3210	2673	1463	1569	2509
ENSG00000082556	OPRK1	protein_coding	1	0	1	0	0	0	0	1	0
ENSG00000082641	NFE2L1	protein_coding	2357	2152	3428	2139	2328	1660	1862	2140	3178
ENSG00000082684	SEMA5B	protein_coding	5	2	6	6	5	5	2	5	13
ENSG00000082701	GSK3B	protein_coding	719	541	1167	971	942	840	700	837	1417
ENSG00000082781	ITGB5	protein_coding	212	157	379	212	226	227	185	207	308
ENSG00000082805	ERC1	protein_coding	813	867	1240	934	1084	768	563	681	1132
ENSG00000082898	XPO1	protein_coding	9965	7645	16646	12726	14889	13051	5946	6869	10339
ENSG00000082929	LINC01587	processed_transcript	0	0	0	0	0	0	0	0	0
ENSG00000082996	RNF13	protein_coding	315	156	444	336	469	363	318	398	608
ENSG00000083067	TRPM3	protein_coding	0	0	2	1	0	0	0	2	3
ENSG00000083093	PALB2	protein_coding	404	327	710	560	612	578	423	521	852
ENSG00000083097	DOPEY1	protein_coding	407	312	691	694	735	609	377	392	708
ENSG00000083099	LYRM2	protein_coding	644	381	1099	957	1063	994	671	816	1299
ENSG00000083123	BCKDHB	protein_coding	400	260	577	438	528	411	312	426	604
ENSG00000083168	KAT6A	protein_coding	917	863	1627	1292	1353	1113	765	846	1645
ENSG00000083223	ZCCHC6	protein_coding	955	839	1560	1671	1830	1647	710	750	1520
ENSG00000083290	ULK2	protein_coding	80	62	148	157	173	149	95	104	207
ENSG00000083307	GRHL2	protein_coding	0	0	0	0	0	0	0	0	0
ENSG00000083312	TNPO1	protein_coding	7712	5731	10914	9150	10418	7413	5188	6665	9029
ENSG00000083444	PLOD1	protein_coding	1565	1369	2356	1291	1338	902	1015	1239	1836
ENSG00000083454	P2RX5	protein_coding	3	0	4	7	5	2	0	0	4
ENSG00000083457	ITGAE	protein_coding	457	290	863	569	638	609	387	541	953
ENSG00000083520	DIS3	protein_coding	9104	7112	14411	10062	11948	10118	7094	7362	11329
ENSG00000083535	PIBF1	protein_coding	1039	884	1501	1641	2016	1660	1047	1271	1930
ENSG00000083544	TDRD3	protein_coding	353	256	618	485	636	495	319	326	533
ENSG00000083622	AC000111.6	antisense	0	0	0	0	0	0	4	0	0
ENSG00000083635	NUFIP1	protein_coding	339	197	442	356	417	343	288	405	550
ENSG00000083642	PDS5B	protein_coding	1364	1136	2070	1780	2190	1638	1041	1059	1764
ENSG00000083720	OXCT1	protein_coding	890	644	1475	1410	1590	1488	765	922	1515
ENSG00000083750	RRAGB	protein_coding	145	107	217	202	198	185	106	163	297
ENSG00000083782	EPYC	protein_coding	0	1	0	0	0	0	0	0	0
ENSG00000083799	CYLD	protein_coding	448	354	713	719	788	534	478	542	966
ENSG00000083807	SLC27A5	protein_coding	91	68	231	137	182	120	117	118	217
ENSG00000083812	ZNF324	protein_coding	143	129	247	198	195	142	156	182	262
ENSG00000083814	ZNF671	protein_coding	7	5	17	9	15	10	7	20	32
ENSG00000083817	ZNF416	protein_coding	117	60	206	125	152	109	155	168	246
ENSG00000083828	ZNF586	protein_coding	227	188	347	193	212	142	262	299	433
ENSG00000083838	ZNF446	protein_coding	55	31	84	51	49	37	37	42	77
ENSG00000083844	ZNF264	protein_coding	134	130	237	195	229	162	160	247	382
ENSG00000083845	RPS5	protein_coding	10846	9143	17798	10527	11853	9454	10668	15193	21642
ENSG00000083857	FAT1	protein_coding	3354	2556	4859	3627	3675	2896	2268	2971	4006
ENSG00000083896	YTHDC1	protein_coding	150	143	598	180	293	125	119	154	326
ENSG00000083937	CHMP2B	protein_coding	1200	1218	1897	1846	2077	1888	1252	1543	2364
ENSG00000084070	SMAP2	protein_coding	687	630	1120	1234	1397	1014	751	935	1230
ENSG00000084072	PPIE	protein_coding	1511	1345	2334	1464	1550	1358	1530	2037	2625
ENSG00000084073	ZMPSTE24	protein_coding	2906	2016	4555	2930	3591	2750	2039	2575	3611
ENSG00000084090	STARD7	protein_coding	1493	1290	2530	2161	2217	1943	1613	2069	3416
ENSG00000084092	NOA1	protein_coding	690	607	1133	796	918	737	542	790	1144
ENSG00000084093	REST	protein_coding	671	527	985	909	978	815	710	783	1206
ENSG00000084110	HAL	protein_coding	2	1	8	4	8	10	8	7	19
ENSG00000084112	SSH1	protein_coding	219	237	364	450	547	394	244	302	597
ENSG00000084207	GSTP1	protein_coding	6281	15294	10114	4140	4701	3863	7197	9495	13665
ENSG00000084234	APLP2	protein_coding	33051	19098	43581	20631	22779	15967	21443	26448	34982
ENSG00000084444	FAM234B	protein_coding	3115	2694	4059	3858	4306	2801	2542	2934	4173
ENSG00000084453	SLCO1A2	protein_coding	0	1	0	1	2	0	2	4	0
ENSG00000084463	WBP11	protein_coding	1596	1417	2980	2117	2272	2050	1790	2391	3633
ENSG00000084623	EIF3I	protein_coding	11537	8968	17534	10539	12319	9077	12454	15933	22318
ENSG00000084628	NKAIN1	protein_coding	30	35	47	45	67	49	32	19	46
ENSG00000084636	COL16A1	protein_coding	4	0	1	11	1	1	1	1	3
ENSG00000084652	TXLNA	protein_coding	2733	2899	4601	3462	3844	3109	2868	3152	4976
ENSG00000084674	APOB	protein_coding	0	0	0	0	0	0	0	0	0
ENSG00000084676	NCOA1	protein_coding	281	207	424	392	430	347	324	413	474
ENSG00000084693	AGBL5	protein_coding	1311	1133	2102	1556	1498	1075	1376	1583	2564
ENSG00000084710	EFR3B	protein_coding	126	123	225	193	205	142	135	157	191
ENSG00000084731	KIF3C	protein_coding	181	132	252	231	228	239	125	162	313
ENSG00000084733	RAB10	protein_coding	1347	893	1947	1708	1805	1529	1299	1439	2035
ENSG00000084734	GCKR	protein_coding	2	1	0	5	3	7	7	2	2
ENSG00000084754	HADHA	protein_coding	1914	1360	3179	3046	3438	3045	1532	1525	2650
ENSG00000084764	MAPRE3	protein_coding	507	483	672	469	482	313	354	474	705
ENSG00000084774	CAD	protein_coding	5874	4385	8731	6453	7114	5341	2825	2281	4034
ENSG00000085063	CD59	protein_coding	1273	870	2001	1492	1763	1400	1182	1660	2288
ENSG00000085117	CD82	protein_coding	93	52	126	57	81	51	73	87	127
ENSG00000085185	BCORL1	protein_coding	2108	1387	2716	2120	2174	1653	2199	2906	3667
ENSG00000085224	ATRX	protein_coding	1427	1409	2655	2369	2764	2619	1311	1513	2520
ENSG00000085231	AK6	protein_coding	0	0	0	0	0	0	0	0	0
ENSG00000085265	FCN1	protein_coding	0	0	2	0	0	0	0	0	0
ENSG00000085274	MYNN	protein_coding	491	260	638	582	566	431	481	606	846
ENSG00000085276	MECOM	protein_coding	730	527	1274	1180	1329	1172	592	742	1033
ENSG00000085365	SCAMP1	protein_coding	792	384	1257	756	817	736	613	864	1233
ENSG00000085377	PREP	protein_coding	2535	2058	3583	2808	3124	2591	1868	2186	3116
ENSG00000085382	HACE1	protein_coding	924	844	1487	1228	1585	1342	662	981	1520
ENSG00000085415	SEH1L	protein_coding	2118	1616	3273	2426	2818	2343	1848	2458	3559
ENSG00000085433	WDR47	protein_coding	546	443	726	650	810	671	491	641	1037
ENSG00000085449	WDFY1	protein_coding	790	687	1301	982	990	811	681	918	1318
ENSG00000085465	OVGP1	protein_coding	50	50	99	150	135	155	78	80	184
ENSG00000085491	SLC25A24	protein_coding	2229	1898	3412	2316	2697	2192	1570	2089	2849
ENSG00000085511	MAP3K4	protein_coding	492	403	843	789	1009	876	469	469	884
ENSG00000085514	PILRA	protein_coding	0	2	2	4	2	0	10	7	5
ENSG00000085552	IGSF9	protein_coding	26	23	27	17	29	20	14	31	41
ENSG00000085563	ABCB1	protein_coding	422	325	640	353	395	386	249	235	408
ENSG00000085644	ZNF213	protein_coding	127	117	188	194	194	138	115	125	237
ENSG00000085662	AKR1B1	protein_coding	6421	4880	10317	5835	6428	5019	7001	9713	12642
ENSG00000085719	CPNE3	protein_coding	2582	1810	4215	3295	3690	3171	1718	1950	3106
ENSG00000085721	RRN3	protein_coding	411	226	744	905	918	760	333	491	837
ENSG00000085733	CTTN	protein_coding	2940	2266	4572	3723	3943	3232	2146	2685	3910
ENSG00000085741	WNT11	protein_coding	49	54	107	67	71	61	53	61	98
ENSG00000085760	MTIF2	protein_coding	947	794	1481	1537	1788	1408	754	972	1489
ENSG00000085788	DDHD2	protein_coding	411	313	660	547	641	569	411	475	855
ENSG00000085831	TTC39A	protein_coding	58	52	100	79	69	55	63	65	122
ENSG00000085832	EPS15	protein_coding	1227	901	2076	1627	1817	1500	1080	1493	2138
ENSG00000085840	ORC1	protein_coding	1661	1215	3026	1953	2308	1895	1783	1658	2968
ENSG00000085871	MGST2	protein_coding	2655	2066	3773	1086	1296	1028	2839	4441	4115
ENSG00000085872	CHERP	protein_coding	1498	1372	2467	1413	1560	1271	1266	1681	2500
ENSG00000085978	ATG16L1	protein_coding	0	0	0	0	0	0	0	0	0
ENSG00000085982	USP40	protein_coding	245	241	432	541	541	426	260	275	541
ENSG00000085998	POMGNT1	protein_coding	238	233	388	313	342	340	202	253	458
ENSG00000085999	RAD54L	protein_coding	492	388	764	745	991	725	453	462	804
ENSG00000086015	MAST2	protein_coding	303	343	544	484	486	410	286	349	722
ENSG00000086061	DNAJA1	protein_coding	11062	10796	15544	11809	13857	11003	11728	13403	19112
ENSG00000086062	B4GALT1	protein_coding	1607	875	2378	1504	1461	1204	1133	1635	2235
ENSG00000086065	CHMP5	protein_coding	1805	1562	2491	1857	2201	1537	2029	2439	3422
ENSG00000086102	NFX1	protein_coding	1147	919	1838	1657	1989	1569	922	988	1713
ENSG00000086159	AQP6	protein_coding	4	9	14	9	9	8	6	5	7
ENSG00000086189	DIMT1	protein_coding	993	925	1845	1274	1561	1410	1071	1305	1868
ENSG00000086200	IPO11	protein_coding	6690	3628	8988	7481	8723	6004	4177	5132	7091
ENSG00000086205	FOLH1	protein_coding	9	7	8	4	3	5	3	3	5
ENSG00000086232	EIF2AK1	protein_coding	1830	1271	2839	2314	2511	2021	1605	2027	3115
ENSG00000086288	NME8	protein_coding	0	0	0	0	0	0	0	0	0
ENSG00000086289	EPDR1	protein_coding	44	46	127	38	67	46	45	78	107
ENSG00000086300	SNX10	protein_coding	647	443	1206	485	605	474	672	813	1377
ENSG00000086475	SEPHS1	protein_coding	1166	1139	2012	896	1022	803	973	1634	1944
ENSG00000086504	MRPL28	protein_coding	2724	1769	3766	2065	2545	1751	2265	2968	4106
ENSG00000086506	HBQ1	protein_coding	56	34	64	38	26	42	23	43	63
ENSG00000086544	ITPKC	protein_coding	217	208	326	285	251	210	166	205	348
ENSG00000086548	CEACAM6	protein_coding	0	0	0	0	0	0	0	0	0
ENSG00000086570	FAT2	protein_coding	5	6	8	6	15	8	5	8	4
ENSG00000086589	RBM22	protein_coding	2840	2504	4202	2706	2928	2161	3005	3617	5790
ENSG00000086598	TMED2	protein_coding	1753	1268	2611	2050	2249	1867	1375	2033	2528
ENSG00000086619	ERO1B	protein_coding	468	264	630	371	427	277	265	386	581
ENSG00000086666	ZFAND6	protein_coding	1046	569	1508	1204	1309	1116	1291	1614	2109
ENSG00000086696	HSD17B2	protein_coding	0	0	0	0	0	0	0	2	0
ENSG00000086712	TXLNG	protein_coding	1309	1904	2127	1653	2043	1689	1155	1533	2511
ENSG00000086717	PPEF1	protein_coding	3	5	9	17	12	12	7	4	10
ENSG00000086730	LAT2	protein_coding	17	17	29	38	43	35	27	18	44
ENSG00000086758	HUWE1	protein_coding	11072	10708	17125	15710	17282	13782	8360	10789	17303
ENSG00000086827	ZW10	protein_coding	1230	860	2229	1914	2307	1820	952	1160	1694
ENSG00000086848	ALG9	protein_coding	21	21	46	32	47	28	28	31	61
ENSG00000086967	MYBPC2	protein_coding	2	4	0	2	5	1	3	2	2
ENSG00000086991	NOX4	protein_coding	0	0	0	0	0	0	0	0	0
ENSG00000087008	ACOX3	protein_coding	472	351	712	483	525	393	427	538	704
ENSG00000087053	MTMR2	protein_coding	803	447	1324	1075	1171	922	706	974	1470
ENSG00000087074	PPP1R15A	protein_coding	715	842	1050	772	730	562	742	1009	1659
ENSG00000087076	HSD17B14	protein_coding	51	63	71	47	46	29	48	57	75
ENSG00000087077	TRIP6	protein_coding	940	719	1388	820	907	719	879	1092	1716
ENSG00000087085	ACHE	protein_coding	98	128	154	80	72	56	74	94	202
ENSG00000087086	FTL	protein_coding	5039	5329	7033	4267	4480	2995	7337	10642	14885
ENSG00000087087	SRRT	protein_coding	6604	6494	9309	6491	7142	5558	4679	4842	8372
ENSG00000087088	BAX	protein_coding	1558	1191	2371	1294	1585	1162	1405	1597	2524
ENSG00000087095	NLK	protein_coding	79	75	121	111	134	143	64	95	110
ENSG00000087111	PIGS	protein_coding	1689	1177	2604	1547	1757	1345	1494	1818	2787
ENSG00000087116	ADAMTS2	protein_coding	72	59	122	92	79	73	44	68	132
ENSG00000087128	TMPRSS11E	protein_coding	0	0	0	0	0	0	0	0	0
ENSG00000087152	ATXN7L3	protein_coding	487	358	784	718	807	580	422	523	1003
ENSG00000087157	PGS1	protein_coding	375	268	485	383	370	276	252	387	577
ENSG00000087191	PSMC5	protein_coding	6289	4378	9359	6529	7081	5840	5502	6864	8928
ENSG00000087206	UIMC1	protein_coding	1673	1553	2762	2017	2086	1710	1571	1877	2874
ENSG00000087237	CETP	protein_coding	1	2	1	1	1	3	2	0	3
ENSG00000087245	MMP2	protein_coding	91	66	124	54	67	44	47	84	110
ENSG00000087250	MT3	protein_coding	0	0	1	0	1	0	0	0	0
ENSG00000087253	LPCAT2	protein_coding	199	149	333	206	275	207	181	203	279
ENSG00000087258	GNAO1	protein_coding	74	54	106	76	69	54	50	71	109
ENSG00000087263	OGFOD1	protein_coding	1488	1162	2379	2024	2335	2052	1656	1901	2879
ENSG00000087266	SH3BP2	protein_coding	163	150	312	237	306	175	180	188	344
ENSG00000087269	NOP14	protein_coding	7675	6065	10015	8517	8654	5975	4982	7065	9315
ENSG00000087274	ADD1	protein_coding	3301	2006	4450	3373	3536	2542	2384	2717	3581
ENSG00000087299	L2HGDH	protein_coding	321	252	575	374	460	429	325	385	681
ENSG00000087301	TXNDC16	protein_coding	492	572	806	694	774	667	401	445	730
ENSG00000087302	C14orf166	protein_coding	4420	3250	7321	5124	6443	5081	4336	5933	7875
ENSG00000087303	NID2	protein_coding	1173	807	1510	671	769	603	563	701	901
ENSG00000087338	GMCL1	protein_coding	217	198	296	359	382	323	216	261	472
ENSG00000087365	SF3B2	protein_coding	14526	15746	20160	15271	16652	12552	14564	18526	23631
ENSG00000087448	KLHL42	protein_coding	138	107	213	204	263	174	150	131	290
ENSG00000087460	GNAS	protein_coding	35518	22989	50480	41136	44443	34417	41154	49796	64666
ENSG00000087470	DNM1L	protein_coding	1470	985	2214	2104	2437	1937	1176	1508	2145
ENSG00000087494	PTHLH	protein_coding	18	10	23	7	22	8	5	19	17
ENSG00000087495	PHACTR3	protein_coding	22	18	24	16	12	22	25	26	31
ENSG00000087502	ERGIC2	protein_coding	314	233	574	530	631	488	285	379	574
ENSG00000087510	TFAP2C	protein_coding	96	97	164	93	112	72	94	157	163
ENSG00000087586	AURKA	protein_coding	3265	1861	4968	3204	3441	2697	4000	5083	7644
ENSG00000087589	CASS4	protein_coding	12	12	14	28	34	15	14	16	18
ENSG00000087842	PIR	protein_coding	554	354	794	473	515	391	466	597	728
ENSG00000087884	AAMDC	protein_coding	191	183	282	236	262	226	249	294	422
ENSG00000087903	RFX2	protein_coding	151	120	312	208	200	158	161	199	329
ENSG00000087995	METTL2A	protein_coding	427	423	692	594	650	526	428	607	840
ENSG00000088002	SULT2B1	protein_coding	39	21	36	21	9	17	31	41	62
ENSG00000088035	ALG6	protein_coding	2243	2277	3207	2095	2331	1804	1344	1624	2466
ENSG00000088038	CNOT3	protein_coding	3	3	3	3	2	7	2	0	4
ENSG00000088053	GP6	protein_coding	0	0	0	0	0	0	0	0	0
ENSG00000088179	PTPN4	protein_coding	138	64	162	189	199	127	116	134	236
ENSG00000088205	DDX18	protein_coding	2555	2223	4378	3656	4489	3910	1709	1624	2716
ENSG00000088247	KHSRP	protein_coding	8689	7953	14079	9245	10078	8400	7951	10080	13853
ENSG00000088256	GNA11	protein_coding	661	681	1154	816	919	627	656	817	1302
ENSG00000088280	ASAP3	protein_coding	0	0	0	0	0	0	0	0	0
ENSG00000088298	EDEM2	protein_coding	315	229	483	372	355	260	266	371	583
ENSG00000088305	DNMT3B	protein_coding	730	477	1185	793	880	652	572	506	813
ENSG00000088320	REM1	protein_coding	0	2	0	0	0	0	0	0	2
ENSG00000088325	TPX2	protein_coding	5113	4703	7643	5318	6121	4917	3722	3192	5745
ENSG00000088340	FER1L4	transcribed_unitary_pseudogene	14	25	23	29	41	36	17	11	52
ENSG00000088356	PDRG1	protein_coding	975	739	1519	929	1140	759	1260	1896	2559
ENSG00000088367	EPB41L1	protein_coding	273	165	376	300	241	199	218	250	414
ENSG00000088386	SLC15A1	protein_coding	5	5	7	4	4	14	6	6	7
ENSG00000088387	DOCK9	protein_coding	441	266	648	656	673	629	300	357	634
ENSG00000088448	ANKRD10	protein_coding	393	379	776	622	749	702	504	491	1022
ENSG00000088451	TGDS	protein_coding	467	355	819	769	884	783	494	623	909
ENSG00000088538	DOCK3	protein_coding	227	232	440	378	436	377	202	248	453
ENSG00000088543	C3orf18	protein_coding	25	27	45	31	48	37	20	44	57
ENSG00000088682	COQ9	protein_coding	378	513	734	420	445	331	306	406	647
ENSG00000088726	TMEM40	protein_coding	0	2	1	4	2	0	0	2	4
ENSG00000088727	KIF9	protein_coding	195	106	259	158	187	173	155	236	311
ENSG00000088756	ARHGAP28	protein_coding	40	33	86	44	47	48	39	42	56
ENSG00000088766	CRLS1	protein_coding	283	178	470	426	456	419	275	307	553
ENSG00000088782	DEFB127	protein_coding	0	0	0	0	0	0	0	0	0
ENSG00000088808	PPP1R13B	protein_coding	448	328	614	511	559	431	405	452	726
ENSG00000088812	ATRN	protein_coding	1213	840	1854	1099	1330	1057	710	803	1250
ENSG00000088826	SMOX	protein_coding	77	59	105	74	75	92	58	73	122
ENSG00000088827	SIGLEC1	protein_coding	0	0	3	0	1	2	0	1	2
ENSG00000088832	FKBP1A	protein_coding	580	524	680	423	421	344	516	809	1197
ENSG00000088833	NSFL1C	protein_coding	1863	1641	2989	1619	1749	1471	1805	2567	3093
ENSG00000088836	SLC4A11	protein_coding	135	100	220	154	171	143	74	126	198
ENSG00000088854	C20orf194	protein_coding	265	190	459	419	528	466	222	268	510
ENSG00000088876	ZNF343	protein_coding	83	89	202	175	217	144	107	102	239
ENSG00000088881	EBF4	protein_coding	41	28	59	41	44	52	40	58	91
ENSG00000088882	CPXM1	protein_coding	0	1	0	0	2	0	0	0	0
ENSG00000088888	MAVS	protein_coding	636	466	970	778	828	634	560	674	1047
ENSG00000088899	LZTS3	protein_coding	108	122	194	174	167	132	105	109	220
ENSG00000088926	F11	protein_coding	0	0	2	0	0	1	0	0	0
ENSG00000088930	XRN2	protein_coding	2136	1711	3680	2981	3484	2896	1433	1452	2362
ENSG00000088970	KIZ	protein_coding	243	232	445	354	439	357	244	299	493
ENSG00000088986	DYNLL1	protein_coding	3145	1917	4353	3617	3729	2613	2642	3212	4836
ENSG00000088992	TESC	protein_coding	151	119	285	135	170	104	120	131	221
ENSG00000089006	SNX5	protein_coding	4374	2934	7281	4706	5158	3987	5366	7090	9908
ENSG00000089009	RPL6	protein_coding	2801	1456	6819	3273	4620	4261	3985	5116	7348
ENSG00000089012	SIRPG	protein_coding	0	0	0	0	0	1	0	0	0
ENSG00000089022	MAPKAPK5	protein_coding	204	187	320	278	339	306	238	253	431
ENSG00000089041	P2RX7	protein_coding	2	3	0	0	3	0	1	1	2
ENSG00000089048	ESF1	protein_coding	2280	2120	3406	2989	3547	3113	1595	1681	2780
ENSG00000089050	RBBP9	protein_coding	120	167	265	163	184	208	108	150	235
ENSG00000089053	ANAPC5	protein_coding	4896	4405	7881	4211	4721	3868	3817	4856	6885
ENSG00000089057	SLC23A2	protein_coding	762	545	1216	845	901	780	692	909	1398
ENSG00000089060	SLC8B1	protein_coding	160	164	296	215	218	205	145	171	316
ENSG00000089063	TMEM230	protein_coding	293	176	450	257	273	191	231	390	554
ENSG00000089091	DZANK1	protein_coding	49	75	60	75	114	72	52	72	121
ENSG00000089094	KDM2B	protein_coding	463	521	834	667	801	661	460	510	967
ENSG00000089101	CFAP61	protein_coding	6	0	21	6	5	7	1	10	2
ENSG00000089116	LHX5	protein_coding	0	0	0	0	0	1	0	0	0
ENSG00000089123	TASP1	protein_coding	94	87	155	145	182	149	93	95	180
ENSG00000089127	OAS1	protein_coding	0	0	0	0	0	0	1	0	0
ENSG00000089154	GCN1	protein_coding	4945	4277	7594	5931	6264	4814	3070	3606	6416
ENSG00000089157	RPLP0	protein_coding	4979	5050	8207	4363	4906	3686	3448	5459	7852
ENSG00000089159	PXN	protein_coding	887	684	1291	788	766	613	672	928	1261
ENSG00000089163	SIRT4	protein_coding	40	51	90	57	60	37	89	71	109
ENSG00000089169	RPH3A	protein_coding	0	2	0	0	2	0	1	1	0
ENSG00000089177	KIF16B	protein_coding	559	544	904	682	753	670	519	676	1023
ENSG00000089195	TRMT6	protein_coding	1370	1833	1920	1680	1910	1658	1048	1373	2043
ENSG00000089199	CHGB	protein_coding	13	15	22	15	10	14	5	17	23
ENSG00000089220	PEBP1	protein_coding	6728	5197	8577	4201	4507	3160	6662	9390	12051
ENSG00000089225	TBX5	protein_coding	0	0	2	0	0	0	0	0	0
ENSG00000089234	BRAP	protein_coding	655	503	1145	795	947	783	820	1031	1592
ENSG00000089248	ERP29	protein_coding	3710	3132	5532	2432	2600	2013	3549	4695	5549
ENSG00000089250	NOS1	protein_coding	0	0	0	0	2	0	0	0	0
ENSG00000089280	FUS	protein_coding	21286	12118	35568	22903	27749	21888	15529	17385	27041
ENSG00000089289	IGBP1	protein_coding	593	535	967	686	837	631	588	847	1028
ENSG00000089327	FXYD5	protein_coding	1157	583	1717	626	629	315	1158	1195	1546
ENSG00000089335	ZNF302	protein_coding	214	70	319	261	313	231	208	223	350
ENSG00000089351	GRAMD1A	protein_coding	793	874	1336	1084	1265	1018	801	944	1669
ENSG00000089356	FXYD3	protein_coding	0	0	0	0	1	1	0	1	0
ENSG00000089472	HEPH	protein_coding	0	0	0	0	0	0	0	0	0
ENSG00000089486	CDIP1	protein_coding	17	15	20	19	25	33	9	20	32
ENSG00000089505	CMTM1	protein_coding	6	3	8	6	11	8	12	2	18
ENSG00000089558	KCNH4	protein_coding	6	6	15	21	21	15	14	7	22
ENSG00000089597	GANAB	protein_coding	22780	13916	33919	16027	17951	14268	10788	13161	20294
ENSG00000089639	GMIP	protein_coding	329	323	566	439	539	510	374	437	822
ENSG00000089682	RBM41	protein_coding	559	490	984	681	716	645	520	588	1002
ENSG00000089685	BIRC5	protein_coding	2208	2132	3111	2121	2173	1826	2452	3247	4411
ENSG00000089692	LAG3	protein_coding	0	0	3	3	2	4	0	3	1
ENSG00000089693	MLF2	protein_coding	1938	1992	3026	2534	2446	2016	1640	2190	3313
ENSG00000089723	OTUB2	protein_coding	0	0	0	0	0	0	0	0	2
ENSG00000089737	DDX24	protein_coding	33	52	79	37	29	25	20	22	49
ENSG00000089775	ZBTB25	protein_coding	146	114	228	245	242	161	131	135	273
ENSG00000089818	NECAP1	protein_coding	826	597	1213	846	1051	751	784	1003	1526
ENSG00000089820	ARHGAP4	protein_coding	22	14	18	14	30	24	15	20	43
ENSG00000089847	ANKRD24	protein_coding	29	35	65	45	55	34	47	44	78
ENSG00000089876	DHX32	protein_coding	260	169	421	387	462	481	205	222	415
ENSG00000089902	RCOR1	protein_coding	853	549	1101	927	1004	786	941	1142	1467
ENSG00000089916	GPATCH2L	protein_coding	593	578	875	685	841	641	674	761	1161
ENSG00000090006	LTBP4	protein_coding	582	458	809	584	625	411	436	553	812
ENSG00000090013	BLVRB	protein_coding	1010	822	1339	691	732	596	1040	1384	1845
ENSG00000090020	SLC9A1	protein_coding	464	287	645	401	451	291	387	495	745
ENSG00000090054	SPTLC1	protein_coding	2568	1987	4013	3508	4089	3471	2128	2795	4162
ENSG00000090060	PAPOLA	protein_coding	888	725	1633	1464	1692	1628	833	1095	1699
ENSG00000090061	CCNK	protein_coding	855	338	1107	457	476	339	824	931	1260
ENSG00000090097	PCBP4	protein_coding	71	48	106	67	88	57	79	87	106
ENSG00000090104	RGS1	protein_coding	0	1	0	0	0	0	0	0	0
ENSG00000090238	YPEL3	protein_coding	264	140	383	235	278	187	280	479	628
ENSG00000090263	MRPS33	protein_coding	2091	1106	2836	2233	2286	1719	2119	2865	3621
ENSG00000090266	NDUFB2	protein_coding	3321	2634	5390	3409	3858	3091	3475	4877	6519
ENSG00000090273	NUDC	protein_coding	3191	3354	4715	3635	3968	2917	2744	3550	5044
ENSG00000090316	MAEA	protein_coding	1645	1470	2277	1748	1933	1232	1731	2236	3184
ENSG00000090339	ICAM1	protein_coding	8	4	1	3	3	0	1	4	5
ENSG00000090372	STRN4	protein_coding	1605	1547	2364	1279	1408	965	1384	1786	2680
ENSG00000090376	IRAK3	protein_coding	0	2	6	0	4	4	2	0	4
ENSG00000090382	LYZ	protein_coding	1	0	2	0	0	0	0	0	4
ENSG00000090402	SI	protein_coding	0	0	0	0	1	0	1	0	2
ENSG00000090432	MUL1	protein_coding	497	360	733	477	478	398	620	792	1102
ENSG00000090447	TFAP4	protein_coding	585	467	984	507	528	423	511	582	887
ENSG00000090470	PDCD7	protein_coding	278	293	531	339	332	319	257	292	554
ENSG00000090487	SPG21	protein_coding	718	368	1101	669	715	613	532	844	1163
ENSG00000090512	FETUB	protein_coding	2	0	0	0	1	0	0	0	0
ENSG00000090520	DNAJB11	protein_coding	1266	1188	1856	1180	1306	1023	1085	1423	1940
ENSG00000090530	P3H2	protein_coding	44	30	71	56	65	41	40	42	65
ENSG00000090534	THPO	protein_coding	0	0	8	5	0	0	4	3	7
ENSG00000090539	CHRD	protein_coding	34	18	52	18	27	24	26	51	72
ENSG00000090554	FLT3LG	protein_coding	0	11	8	9	10	6	2	5	4
ENSG00000090565	RAB11FIP3	protein_coding	0	3	6	7	2	3	1	2	4
ENSG00000090581	GNPTG	protein_coding	402	298	583	254	240	168	305	454	469
ENSG00000090612	ZNF268	protein_coding	57	25	75	104	132	110	75	60	114
ENSG00000090615	GOLGA3	protein_coding	613	587	1087	1061	1074	791	644	739	1348
ENSG00000090621	PABPC4	protein_coding	2587	2350	4169	2807	3161	2580	1370	1483	2665
ENSG00000090659	CD209	protein_coding	46	29	67	53	72	52	32	48	76
ENSG00000090661	CERS4	protein_coding	159	97	205	151	142	111	136	168	258
ENSG00000090674	MCOLN1	protein_coding	336	243	518	290	307	232	233	269	465
ENSG00000090686	USP48	protein_coding	2286	2210	3308	2634	3284	2404	1834	2247	3343
ENSG00000090776	EFNB1	protein_coding	247	179	367	189	224	152	199	243	366
ENSG00000090857	PDPR	protein_coding	271	188	495	454	489	407	361	401	665
ENSG00000090861	AARS	protein_coding	16828	15521	24976	15112	16328	12706	11019	12122	18110
ENSG00000090863	GLG1	protein_coding	10919	12532	16597	8789	9879	7396	5847	6720	11165
ENSG00000090889	KIF4A	protein_coding	1897	1579	2810	2443	2722	1951	1373	1353	2226
ENSG00000090905	TNRC6A	protein_coding	835	926	1399	1186	1358	1055	780	943	1614
ENSG00000090924	PLEKHG2	protein_coding	268	219	418	362	353	288	241	285	503
ENSG00000090932	DLL3	protein_coding	121	125	242	95	100	93	62	100	128
ENSG00000090971	NAT14	protein_coding	429	425	631	428	450	378	269	365	594
ENSG00000090975	PITPNM2	protein_coding	63	63	134	112	129	74	66	89	140
ENSG00000090989	EXOC1	protein_coding	1021	799	1554	975	1168	969	576	542	959
ENSG00000091009	RBM27	protein_coding	250	374	418	424	506	403	331	338	595
ENSG00000091010	POU4F3	protein_coding	0	3	1	2	1	0	1	1	4
ENSG00000091039	OSBPL8	protein_coding	976	747	1437	1349	1493	1320	932	1157	1613
ENSG00000091073	DTX2	protein_coding	21	9	33	35	35	27	33	24	33
ENSG00000091106	NLRC4	protein_coding	8	4	2	8	14	14	14	8	22
ENSG00000091127	PUS7	protein_coding	1287	1165	2276	1583	1904	1683	990	1255	2019
ENSG00000091128	LAMB4	protein_coding	1	1	2	3	2	2	2	3	3
ENSG00000091129	NRCAM	protein_coding	688	733	1003	487	561	431	360	522	607
ENSG00000091136	LAMB1	protein_coding	3788	3308	5702	3721	4125	3206	1991	2420	3495
ENSG00000091137	SLC26A4	protein_coding	4	4	4	4	16	6	5	2	15
ENSG00000091138	SLC26A3	protein_coding	0	0	0	2	1	0	1	3	3
ENSG00000091140	DLD	protein_coding	2737	2378	4970	3866	4623	3605	2509	2768	4433
ENSG00000091157	WDR7	protein_coding	329	288	553	426	504	402	250	306	484
ENSG00000091164	TXNL1	protein_coding	2799	2111	4437	3382	3841	3343	2649	3597	4734
ENSG00000091181	IL5RA	protein_coding	4	0	2	6	5	3	3	1	3
ENSG00000091262	ABCC6	protein_coding	0	0	2	0	0	0	1	0	2
ENSG00000091317	CMTM6	protein_coding	733	668	1320	786	998	841	539	772	1266
ENSG00000091409	ITGA6	protein_coding	1582	844	2522	1447	1600	1155	885	1084	1458
ENSG00000091428	RAPGEF4	protein_coding	102	87	146	135	142	138	95	91	138
ENSG00000091436	AC013461.1	protein_coding	539	453	831	684	887	698	498	662	892
ENSG00000091482	SMPX	protein_coding	0	1	2	2	1	0	1	0	1
ENSG00000091483	FH	protein_coding	5971	3472	8908	6058	7115	5641	4711	6376	8678
ENSG00000091490	SEL1L3	protein_coding	86	64	146	93	133	116	69	78	129
ENSG00000091513	TF	protein_coding	1	0	6	4	1	2	0	2	1
ENSG00000091527	CDV3	protein_coding	1528	3415	2531	2452	2917	2253	1635	1966	2900
ENSG00000091536	MYO15A	protein_coding	6	16	13	20	13	10	16	9	24
ENSG00000091542	ALKBH5	protein_coding	922	718	1458	1100	1389	1035	975	1212	1914
ENSG00000091583	APOH	protein_coding	0	0	0	0	0	0	0	0	0
ENSG00000091592	NLRP1	protein_coding	143	89	230	170	135	120	211	264	348
ENSG00000091622	PITPNM3	protein_coding	36	41	65	60	76	57	26	49	93
ENSG00000091640	SPAG7	protein_coding	531	472	982	492	615	446	530	597	913
ENSG00000091651	ORC6	protein_coding	2680	1872	3771	2215	2589	1919	3663	5069	6637
ENSG00000091656	ZFHX4	protein_coding	869	716	1362	1021	1086	940	762	906	1399
ENSG00000091664	SLC17A6	protein_coding	0	0	0	0	0	0	0	0	0
ENSG00000091704	CPA1	protein_coding	1	0	0	0	5	0	0	0	0
ENSG00000091732	ZC3HC1	protein_coding	726	705	1152	985	996	827	716	845	1376
ENSG00000091831	ESR1	protein_coding	0	1	3	0	6	3	1	0	5
ENSG00000091844	RGS17	protein_coding	54	19	52	49	75	57	44	76	67
ENSG00000091879	ANGPT2	protein_coding	4	2	1	10	7	0	5	5	3
ENSG00000091947	TMEM101	protein_coding	576	469	900	612	616	510	612	763	976
ENSG00000091972	CD200	protein_coding	0	0	0	0	0	0	0	0	1
ENSG00000091986	CCDC80	protein_coding	223	217	282	147	186	138	158	190	285
ENSG00000092009	CMA1	protein_coding	0	0	0	0	0	0	1	0	0
ENSG00000092010	PSME1	protein_coding	1319	1314	1900	1165	1257	1028	1238	1725	2133
ENSG00000092020	PPP2R3C	protein_coding	455	319	776	593	609	566	524	549	784
ENSG00000092036	HAUS4	protein_coding	469	236	829	431	495	448	410	675	915
ENSG00000092051	JPH4	protein_coding	0	20	4	5	9	9	5	6	11
ENSG00000092054	MYH7	protein_coding	0	0	0	0	0	0	1	0	5
ENSG00000092067	CEBPE	protein_coding	0	0	0	0	0	1	0	0	0
ENSG00000092068	SLC7A8	protein_coding	383	421	588	442	478	324	358	450	662
ENSG00000092094	OSGEP	protein_coding	1307	876	2103	1398	1656	1379	1186	1731	2454
ENSG00000092096	SLC22A17.1	protein_coding	28	27	40	23	21	32	17	26	53
ENSG00000092098	RNF31	protein_coding	185	131	245	184	219	155	145	174	260
ENSG00000092108	SCFD1	protein_coding	831	507	1351	1118	1459	1231	733	933	1425
ENSG00000092140	G2E3	protein_coding	532	495	818	775	897	765	345	489	765
ENSG00000092148	HECTD1	protein_coding	3433	2809	5525	4854	5697	4945	2000	2078	3597
ENSG00000092199	HNRNPC	protein_coding	20344	8912	28386	17964	16076	13800	18719	25567	36181
ENSG00000092200	RPGRIP1	protein_coding	2	3	15	14	26	14	13	8	10
ENSG00000092201	SUPT16H	protein_coding	9486	6943	17901	13590	15471	14261	5416	4324	8625
ENSG00000092203	TOX4	protein_coding	632	432	870	783	812	659	744	914	1348
ENSG00000092208	GEMIN2	protein_coding	676	473	1045	736	923	796	608	829	1214
ENSG00000092295	TGM1	protein_coding	16	20	20	32	23	25	13	22	34
ENSG00000092330	TINF2	protein_coding	308	281	531	284	267	253	202	338	477
ENSG00000092345	DAZL	protein_coding	0	0	0	0	0	0	0	0	0
ENSG00000092377	TBL1Y	protein_coding	2	2	0	2	4	1	0	0	1
ENSG00000092421	SEMA6A	protein_coding	341	276	561	448	469	401	248	335	535
ENSG00000092439	TRPM7	protein_coding	538	824	992	1084	1421	1125	606	747	1300
ENSG00000092445	TYRO3	protein_coding	219	171	373	230	255	180	200	210	384
ENSG00000092470	WDR76	protein_coding	1259	941	2107	1645	1884	1545	1199	1296	2083
ENSG00000092529	CAPN3	protein_coding	0	0	7	2	1	1	1	0	3
ENSG00000092531	SNAP23	protein_coding	815	779	1393	929	1219	978	906	1123	1604
ENSG00000092607	TBX15	protein_coding	1	0	3	6	0	3	0	4	7
ENSG00000092621	PHGDH	protein_coding	13658	11155	18733	11275	11907	8895	11725	13087	18348
ENSG00000092758	COL9A3	protein_coding	13	29	48	23	25	16	25	20	44
ENSG00000092820	EZR	protein_coding	3605	3318	6147	3835	4117	3763	2265	1963	3604
ENSG00000092841	MYL6	protein_coding	8788	7615	9149	5183	7223	5476	9488	9861	12473
ENSG00000092847	AGO1	protein_coding	710	604	1138	807	914	710	730	839	1518
ENSG00000092850	TEKT2	protein_coding	18	20	31	16	34	22	22	25	38
ENSG00000092853	CLSPN	protein_coding	3949	4205	6103	4681	5503	4600	3393	3675	5722
ENSG00000092871	RFFL	protein_coding	38	31	85	58	78	57	37	44	99
ENSG00000092929	UNC13D	protein_coding	4	8	7	5	7	5	2	12	12
ENSG00000092931	MFSD11	protein_coding	882	393	1269	830	887	572	690	850	1080
ENSG00000092964	DPYSL2	protein_coding	1186	1012	1587	1013	1095	768	861	1020	1502
ENSG00000092969	TGFB2	protein_coding	14	16	33	26	12	16	26	39	37
ENSG00000092978	GPATCH2	protein_coding	1090	989	1811	1425	1593	1332	1077	1343	2137
ENSG00000093000	NUP50	protein_coding	420	464	719	703	783	556	493	564	910
ENSG00000093009	CDC45	protein_coding	6352	6243	8914	5225	5729	4033	4438	5869	8250
ENSG00000093010	COMT	protein_coding	1172	941	1565	970	1033	786	969	1227	1789
ENSG00000093072	CECR1	protein_coding	4	1	2	9	6	2	3	4	9
ENSG00000093100	XXbac-B461K10.4	processed_transcript	0	2	2	2	6	3	0	0	7
ENSG00000093134	VNN3	protein_coding	0	0	0	0	0	0	0	0	0
[truncated: 55,994 more rows]

## Sheet: Column definition
Sheet 1: ER-proximal translatome
Ensemble Gene ID	Ensemble Gene ID
Gene name	Gene name
Gene type	Gene type
UniprotID	Uniprot protein id
Log2 (ERM E/I)	Log2 of RNA abundance ratio (ERM Enrich vs Input)
P-adj (ERM E/I)	Adjusted p value comparing difference between ERM Enrich vs ERM Input
Log2 (Enrich E/N)	Log2 of RNA abundance ratio (Enrich ERM/NES)
P-adj (Enrich E/N)	Adjusted p value comparing difference between ERM Enrich vs NES Enrich
GOCC secretome	Secretory genes according to GOCC and mitoCarta. This includes genes containing terms: GO:0005886, GO:0005576, GO:0016021, GO:0016020, GO:0005786, GO:0005615, GO:0005789, GO:0005887, GO:0005783, GO:0005794, GO:0000139, GO:0005796, GO:0010008, GO:0005788, GO:0005765, GO:0005764, GO:0005768, GO:0031410, GO:0005777, GO:0031982, GO:0012507 (1=yes, 0=no)
HPA secretome	Secretory genes according to the Human Protein Atlas. This includes genes containing terms: Endoplasmic reticulum, Golgi apparatus, Plasma membrane, Secreted proteins, Vesicles. (1=yes, 0=no)
MitoCarta	MitoCarta predicted (1=yes, 0=no)
Secretome	Secretory genes annotated by HPA secretome, or by GOCC secretome but excluding MitoCarta. (1=yes, 0=no)
Sheet 2: Unfiltered data
Ensemble Gene ID	Ensemble Gene ID
Gene name	Gene name
Gene type	Gene type
UniprotID	Uniprot protein id
Log2 (ERM E/I)	Log2 of RNA abundance ratio (ERM Enrich vs Input)
P-adj (ERM E/I)	Adjusted p value comparing difference between ERM Enrich vs ERM Input
Log2 (Enrich E/N)	Log2 of RNA abundance ratio (Enrich ERM/NES)
P-adj (Enrich E/N)	Adjusted p value comparing difference between ERM Enrich vs NES Enrich
GOCC secretome	Secretory genes according to GOCC and mitoCarta. This includes genes containing terms: GO:0005886, GO:0005576, GO:0016021, GO:0016020, GO:0005786, GO:0005615, GO:0005789, GO:0005887, GO:0005783, GO:0005794, GO:0000139, GO:0005796, GO:0010008, GO:0005788, GO:0005765, GO:0005764, GO:0005768, GO:0031410, GO:0005777, GO:0031982, GO:0012507 (1=yes, 0=no)
HPA secretome	Secretory genes according to the Human Protein Atlas. This includes genes containing terms: Endoplasmic reticulum, Golgi apparatus, Plasma membrane, Secreted proteins, Vesicles. (1=yes, 0=no)
MitoCarta	MitoCarta predicted (1=yes, 0=no)
Secretome	Secretory genes annotated by HPA secretome, or by GOCC secretome but excluding MitoCarta. (1=yes, 0=no)
Sheet 3: ERM overlap
Ensemble Gene ID	Ensemble Gene ID
Gene name	Gene name
Gene type	Gene type
UniprotID	Uniprot protein id
Log2 (ERM E/I)	Log2 of RNA abundance ratio (ERM Enrich vs Input)
P-adj (ERM E/I)	Adjusted p value comparing difference between ERM Enrich vs ERM Input
Log2 (Enrich E/N)	Log2 of RNA abundance ratio (Enrich ERM/NES)
P-adj (Enrich E/N)	Adjusted p value comparing difference between ERM Enrich vs NES Enrich
GOCC secretome	Secretory genes according to GOCC and mitoCarta. This includes genes containing terms: GO:0005886, GO:0005576, GO:0016021, GO:0016020, GO:0005786, GO:0005615, GO:0005789, GO:0005887, GO:0005783, GO:0005794, GO:0000139, GO:0005796, GO:0010008, GO:0005788, GO:0005765, GO:0005764, GO:0005768, GO:0031410, GO:0005777, GO:0031982, GO:0012507 (1=yes, 0=no)
HPA secretome	Secretory genes according to the Human Protein Atlas. This includes genes containing terms: Endoplasmic reticulum, Golgi apparatus, Plasma membrane, Secreted proteins, Vesicles. (1=yes, 0=no)
MitoCarta	MitoCarta predicted (1=yes, 0=no)
Secretome	Secretory genes annotated by HPA secretome, or by GOCC secretome but excluding MitoCarta. (1=yes, 0=no)
OptoRibo-seq	OptoRibo-seq detected (1=yes, 0=no)
Proximity Ribo-seq	Proximity-specific ribosome profiling detected (1=yes, 0=no)
Sheet 4: Newly discovered mRNAs
Ensemble Gene ID	Ensemble Gene ID
Gene name	Gene name
Gene type	Gene type
UniprotID	Uniprot protein id
Log2 (ERM E/I)	Log2 of RNA abundance ratio (ERM Enrich vs Input)
P-adj (ERM E/I)	Adjusted p value comparing difference between ERM Enrich vs ERM Input
Log2 (Enrich E/N)	Log2 of RNA abundance ratio (Enrich ERM/NES)
P-adj (Enrich E/N)	Adjusted p value comparing difference between ERM Enrich vs NES Enrich
GOCC secretome	Secretory genes according to GOCC and mitoCarta. This includes genes containing terms: GO:0005886, GO:0005576, GO:0016021, GO:0016020, GO:0005786, GO:0005615, GO:0005789, GO:0005887, GO:0005783, GO:0005794, GO:0000139, GO:0005796, GO:0010008, GO:0005788, GO:0005765, GO:0005764, GO:0005768, GO:0031410, GO:0005777, GO:0031982, GO:0012507 (1=yes, 0=no)
HPA secretome	Secretory genes according to the Human Protein Atlas. This includes genes containing terms: Endoplasmic reticulum, Golgi apparatus, Plasma membrane, Secreted proteins, Vesicles. (1=yes, 0=no)
MitoCarta	MitoCarta predicted (1=yes, 0=no)
Secretome	Secretory genes annotated by HPA secretome, or by GOCC secretome but excluding MitoCarta. (1=yes, 0=no)
Sheet 5: Counts data
Ensemble Gene ID	Ensemble Gene ID
Gene name	Gene name
Gene type	Gene type
ERM Enrich Counts	Mapping counts of ERM optoRibo-seq sample after enrichment
ERM Input Counts	Mapping counts of ERM optoRibo-seq sample before enrichment
NES Enrich Counts	Mapping counts of NES optoRibo-seq sample after enrichment
