# Supplementary material for: OptoRibo-seq for spatiotemporally resolved mapping of local protein translatome
Source: Research Square preprint supplement (doi:10.21203/rs.3.rs-3982122/v1), 2024-03-05
Supplement: Supplementary file 5 [file ecf2461e6ce5c0c29cb4378f.xlsx]

## Sheet: HEK293T Basal
mRNA foci (pixels)
CANX
Ctrl	DIG	PURO
48721	52043	23672
67096	46666	28151
69531	45220	16211
58440	36570	17902
37227	41188	24865
64452	48602	40594
36864	58621	15023
39942	54083	12799
78872	35512	26931
38938	54780	26653
38341	50760	29061
49057	60016	33993
50459	29693	30366
38842	32836	36306
36388	64319	24231
41285	57659	41369
49878	46178	35635
47614	46918	39523
44852	62324	18096
81274	58331	37769

## Sheet: HeLa Basal
mRNA foci (pixels)
CANX			ACTB			COPB2			HSP90AB1			SERPINB6			HSPA5			PRKCSH
Ctrl	DIG	PURO	Ctrl	DIG	PURO	Ctrl	DIG	PURO	Ctrl	DIG	PURO	Ctrl	DIG	PURO	Ctrl	DIG	PURO	Ctrl	DIG	PURO
104585	61698	50123	215987	176822	97360	35776	56116	47466	159007	139459	56182	61092	38071	9048	75985	50064	15358	46091	71941	32225
77162	94725	33800	303021	145746	161538	68175	62461	42879	124322	131668	62528	59145	31278	6993	71551	51334	15995	94156	65984	29010
127850	92002	57659	180928	118699	87014	107183	98980	29618	142798	133790	62920	22134	29061	12331	69948	58834	20117	71146	68712	41919
105576	96163	82223	294825	85703	125774	63855	109697	54056	117634	128371	63365	69157	36123	7315	62062	38665	33550	91871	68334	41086
106611	99815	65070	228460	155289	84900	75622	87821	37257	172614	109658	66913	44653	59362	8077	61363	42035	35057	82927	54991	37173
117243	105677	56881	232604	107247	63104	62735	89916	60342	141254	151880	28820	33939	40122	5715	49160	64348	24801	60790	62497	26471
139659	104589	39275	268788	77541	110342	43888	45996	32716	119571	183687	68425	45864	36566	14363	56426	63728	27529	46710	51762	36659
121560	101490	50485	172518	144868	73838	76860	53141	43476	231908	145169	75969	50288	27180	14496	62459	72399	21376	47159	53070	26301
134414	68861	68117	183782	102260	101897	53845	65401	54350	204773	155655	32903	56439	27296	7985	75991	70050	15875	70353	68543	41527
147854	124604	42091	250935	107227	65305	98741	73239	29624	158896	125621	45731	45971	24791	6544	61377	44578	26860	96073	66479	35693
95188	111499	57021	210750	180673	157890	66891	76730	42558	144402	135480	49019	40499	22444	8455	49630	49969	22217	77022	54587	35693
116674	101595	45087	275636	110371	90287	88986	79547	57444	208344	103536	66268	31415	48657	5753	60793	65034	23758	63948	48537	31340
75133	119521	57162	264973	126283	60845	65209	96124	48508	178558	139716	72649	48574	53241	10430	74730	62289	21803	61171	43665	21664
114853	73010	62507	176017	103320	101449	83979	96343	25352	114321	111228	39944	33005	35007	8969	56055	64215	20940	50415	60186	30110
151343	99743	39626	226879	119262	59711	88141	59272	38504	110633	91817	64129	31703	32994	5559	53758	78627	25417	67462	87247	41203
88423	99311	42874	217649	113684	95697	86852	54692	24392	128380	97236	45014	25212	49794	11559	54943	64201	27307	46409	60640	33790
77877	135081	47410	257013	99446	95091	67868	69131	37633	144111	143386	44801	22699	38838	9236	58019	76245	14617	70378	73672	27723
96394	71687	43829	232143	119392	61112	57469	68970	26737	127181	109845	60121	57186	44803	8604	51959	60407	25997	62882	56882	41816
124590	72097	59290	324229	122445	106416	59175	55923	34296	97806	147190	41064	31355	26102	7741	77079	56428	25401	64358	52836	29607
122086	116036	28127	257160	119969	122963	101254	57208	25927	196415	139807	61662	30840	38985	9281	58257	71696	22801	47480	58712	45320

## Sheet: HeLa Tg
mRNA foci (pixels)
HSPA5			PRKCSH
Ctrl	DIG	PURO	Ctrl	DIG	PURO
251194	311416	214822	58028	68512	27729
414474	257424	125442	67949	59923	35024
272686	389266	175279	73304	58826	43102
287431	320964	164809	86512	62936	40143
340260	218302	119954	44562	43894	35526
348531	299925	203790	61322	52702	37079
446074	263562	171469	63598	63781	51265
275936	167231	153818	54591	37871	44050
255437	259523	120442	40494	76910	35419
275816	238074	140751	56411	41408	47030
454975	332370	166748	57742	63555	30541
267640	301614	157980	42892	41529	46422
268795	229982	116603	66363	79203	21597
306815	239945	170191	75170	58998	48513
285443	307882	170602	50506	51136	42172
248740	342842	210823	55550	44006	25341
366482	287981	125613	90003	66531	39474
352577	321842	200533	46432	53447	38826
351408	282658	140589	67236	44290	52647
337030	316586	166459	53078	67074	36496

## Sheet: Column definition
Sheet 1: HEK293T Basal
mRNA foci (pixels)	mRNA foci volume of smFISH signals
Ctrl	Samples without treatment
DIG	Samples treated with digitonin
PURO	Samples treated with puromycin and digitonin
Sheet 2: HeLa Basal
mRNA foci (pixels)	mRNA foci volume of smFISH signals
Ctrl	Samples without treatment
DIG	Samples treated with digitonin
PURO	Samples treated with puromycin and digitonin
Sheet 3: HeLa Tg
mRNA foci (pixels)	mRNA foci volume of smFISH signals
Ctrl	Samples without treatment
DIG	Samples treated with digitonin
PURO	Samples treated with puromycin and digitonin
