# Supplementary material for: OptoRibo-seq for spatiotemporally resolved mapping of local protein translatome
Source: Research Square preprint supplement (doi:10.21203/rs.3.rs-3982122/v1), 2024-03-05
Supplement: Supplementary file 6 [file f79e22971828c93d3839f057.xlsx]

## Sheet: ER-proximal Tg translatome
Ensemble Gene ID	Gene name	Gene type	UniprotID	Log2 (ERM Tg E/I)	P-adj (ERM Tg E/I)	Log2 (Enrich Tg E/N)	P-adj (Enrich Tg E/N)	GOCC secretome	HPA secretome	MitoCarta	Secretome
ENSG00000001461	NIPAL3	protein_coding	Q6P499	0.353363	0.0418965	0.397912	0.0397532	1	0	0	1
ENSG00000004139	SARM1	protein_coding	Q6SZW1	1.81604	5.99598e-20	0.535867	0.0126263	0	1	0	1
ENSG00000005206	SPPL2B	protein_coding	Q8TCT7	0.791623	0.000106056	0.643495	0.00709186	1	1	0	1
ENSG00000006282	SPATA20	protein_coding	Q8TB22	0.7631	0.00153507	0.557558	0.0460263	1	1	1	1
ENSG00000008300	CELSR3	protein_coding	Q9NYQ7	0.392172	0.00112962	0.495694	4.87846e-05	1	0	0	1
ENSG00000008838	MED24	protein_coding	O75448	0.310089	0.00483504	0.456809	0.000120173	0	0	0	0
ENSG00000010295	IFFO1	protein_coding	Q0D2I5	0.897602	2.94772e-11	0.349313	0.0271221	0	0	0	0
ENSG00000011485	PPP5C	protein_coding	P53041	0.332874	0.000983517	0.309855	0.0101298	1	1	0	1
ENSG00000013288	MAN2B2	protein_coding	Q9Y2E5	0.927709	4.33541e-06	0.485947	0.040588	0	1	0	1
ENSG00000013573	DDX11	protein_coding	Q96FC9	1.31368	1.53921e-25	0.498723	0.00014548	0	0	0	0
ENSG00000023318	ERP44	protein_coding	Q9BS26	0.990523	1.87927e-16	0.437995	0.00343584	1	1	0	1
ENSG00000027847	B4GALT7	protein_coding	Q9UBV7	0.877157	2.0765e-07	0.453626	0.0227193	1	0	0	1
ENSG00000029364	SLC39A9	protein_coding	Q9NUM3	0.871538	1.02956e-16	0.396374	0.00158833	1	1	0	1
ENSG00000044574	HSPA5	protein_coding	P11021	1.38674	7.77394e-63	0.390692	1.20937e-05	1	1	0	1
ENSG00000049323	LTBP1	protein_coding	Q14766	0.413927	0.0159599	0.787505	1.77752e-05	1	1	0	1
ENSG00000052749	RRP12	protein_coding	Q5JTH9	0.338174	0.000123521	0.342756	0.000922115	1	0	0	1
ENSG00000058262	SEC61A1	protein_coding	P61619	0.95649	1.55422e-29	0.459947	2.74311e-06	1	1	0	1
ENSG00000063245	EPN1	protein_coding	Q9Y6I3	0.495728	9.56445e-05	0.419431	0.00370776	1	0	0	1
ENSG00000064545	TMEM161A	protein_coding	Q9NX61	1.0211	4.66249e-25	0.409149	0.000270102	1	0	0	1
ENSG00000064601	CTSA	protein_coding	P10619	0.610935	0.000307376	0.423739	0.0324956	1	1	0	1
ENSG00000065600	TMEM206	protein_coding	Q9H813	1.01058	9.24237e-12	0.368502	0.0331147	1	0	0	1
ENSG00000067141	NEO1	protein_coding	Q92859	0.386809	0.00316549	0.327739	0.0254194	1	1	0	1
ENSG00000071242	RPS6KA2	protein_coding	Q15349	0.543509	0.0105264	0.522885	0.026516	0	0	0	0
ENSG00000071655	MBD3	protein_coding	O95983	1.18229	8.66654e-27	0.533456	1.20937e-05	0	0	0	0
ENSG00000071889	FAM3A	protein_coding	P98173	0.927799	1.12962e-12	0.440693	0.00218141	1	0	0	1
ENSG00000073060	SCARB1	protein_coding	Q8WTV0	0.472874	5.65436e-06	0.308795	0.0130809	1	1	0	1
ENSG00000076706	MCAM	protein_coding	P43121	0.4798	0.00659135	0.420043	0.0302257	1	1	0	1
ENSG00000076716	GPC4	protein_coding	O75487	1.02197	1.13109e-20	0.438801	0.00249661	1	1	0	1
ENSG00000077147	TM9SF3	protein_coding	Q9HD45	0.311186	0.00137008	0.427824	1.13216e-05	1	1	0	1
ENSG00000077942	FBLN1	protein_coding	P23142	1.59441	2.64978e-49	0.325371	0.00621233	1	1	0	1
ENSG00000078061	ARAF	protein_coding	P10398	0.340284	0.0270966	0.435232	0.00871081	0	0	0	0
ENSG00000078808	SDF4	protein_coding	Q9BRK5	1.18641	1.55724e-32	0.380733	0.00112736	1	1	0	1
ENSG00000079313	REXO1	protein_coding	Q8N1G1	0.660431	3.98616e-05	0.373725	0.0418548	0	0	0	0
ENSG00000080189	SLC35C2	protein_coding	Q9NQQ7	0.775789	1.84326e-08	0.467929	0.00194596	1	1	0	1
ENSG00000081479	LRP2	protein_coding	P98164	0.314378	0.0232954	0.47723	0.00184835	1	1	0	1
ENSG00000083444	PLOD1	protein_coding	Q02809	0.617771	1.30467e-08	0.37505	0.00586881	1	1	0	1
ENSG00000087303	NID2	protein_coding	Q14112	1.10027	1.71474e-14	0.575769	0.00127636	1	1	0	1
ENSG00000090006	LTBP4	protein_coding	Q8N2S1	0.626755	8.6825e-06	0.523616	0.00149123	1	1	0	1
ENSG00000090372	STRN4	protein_coding	Q9NRL3	1.25713	1.16956e-30	0.440136	0.000403609	1	0	0	1
ENSG00000090863	GLG1	protein_coding	Q92896	0.589587	4.91659e-14	0.328959	0.000474697	1	1	0	1
ENSG00000091136	LAMB1	protein_coding	P07942	0.33336	0.00107499	0.424932	9.63119e-05	1	1	0	1
ENSG00000099904	ZDHHC8	protein_coding	Q9ULC8	0.916804	1.38141e-08	0.47252	0.0101298	1	0	0	1
ENSG00000100241	SBF1	protein_coding	O95248	0.394267	0.00054087	0.386307	0.000452951	1	0	0	1
ENSG00000100263	RHBDD3	protein_coding	Q9Y3P4	0.565162	4.08296e-05	0.346302	0.0326637	1	0	0	1
ENSG00000100335	MIEF1	protein_coding	Q9NQG6	0.521652	8.79775e-07	0.324364	0.00976129	1	0	1	0
ENSG00000100403	ZC3H7B	protein_coding	Q9UGR2	0.903005	3.65002e-16	0.439287	0.000161883	0	0	0	0
ENSG00000101337	TM9SF4	protein_coding	Q92544	0.603456	6.96002e-09	0.461961	4.3051e-05	1	0	0	1
ENSG00000102755	FLT1	protein_coding	P17948	0.47374	0.00166775	0.378893	0.0343522	1	1	0	1
ENSG00000103227	LMF1	protein_coding	Q96S06	0.907787	3.71176e-06	0.472692	0.0459136	1	0	0	1
ENSG00000103335	PIEZO1	protein_coding	Q92508	0.40175	0.0167364	0.546385	0.00329646	1	0	0	1
ENSG00000103512	NOMO1	protein_coding	Q15155	3.0249	4.50435e-19	1.92293	5.5761e-09	1	1	0	1
ENSG00000104714	ERICH1	protein_coding	#N/A	0.960115	2.05545e-09	0.391306	0.0350763	0	0	0	0
ENSG00000104805	NUCB1	protein_coding	Q02818	1.13385	5.50676e-35	0.309579	0.0046808	1	1	0	1
ENSG00000104853	CLPTM1	protein_coding	O96005	0.66838	2.00793e-11	0.315041	0.0059212	1	0	0	1
ENSG00000104907	TRMT1	protein_coding	Q9NXH9	0.494802	9.227e-07	0.33656	0.00533232	0	1	1	1
ENSG00000105281	SLC1A5	protein_coding	Q15758	0.756199	1.31124e-21	0.330861	0.00020241	1	1	0	1
ENSG00000105397	TYK2	protein_coding	P29597	0.437821	0.00016789	0.320195	0.0258182	1	0	0	1
ENSG00000105429	MEGF8	protein_coding	Q7Z7M0	0.320167	0.00988869	0.415395	0.00222291	1	0	0	1
ENSG00000105576	TNPO2	protein_coding	O14787	0.406364	2.10898e-06	0.329178	0.000851457	0	0	0	0
ENSG00000105726	ATP13A1	protein_coding	Q9HD20	0.598253	1.02611e-08	0.402164	0.00172419	1	1	0	1
ENSG00000106404	CLDN15	protein_coding	P56746	0.765549	0.000185719	0.739942	0.00211082	1	1	0	1
ENSG00000106868	SUSD1	protein_coding	Q6UWL2	1.02363	4.47858e-09	0.470257	0.0169301	1	1	0	1
ENSG00000107731	UNC5B	protein_coding	Q8IZJ1	0.378559	0.00352857	0.373005	0.011401	1	0	0	1
ENSG00000108679	LGALS3BP	protein_coding	Q08380	0.865952	1.15726e-07	0.477163	0.0240762	1	1	0	1
ENSG00000108797	CNTNAP1	protein_coding	P78357	0.479291	0.0482844	0.602987	0.0339727	1	0	0	1
ENSG00000108840	HDAC5	protein_coding	Q9UQL6	0.505455	0.000159499	0.425042	0.00999755	1	1	0	1
ENSG00000110046	ATG2A	protein_coding	Q2TAZ0	0.637698	5.08242e-07	0.468862	0.00112736	0	1	0	1
ENSG00000110811	P3H3	protein_coding	Q8IVL6	0.704321	0.0013359	0.584584	0.0290045	1	1	0	1
ENSG00000110931	CAMKK2	protein_coding	Q96RR4	0.349168	0.00969992	0.388852	0.00912934	0	0	0	0
ENSG00000112759	SLC29A1	protein_coding	Q99808	0.430909	0.00128015	0.447129	0.004071	1	0	0	1
ENSG00000112769	LAMA4	protein_coding	Q16363	0.581183	5.05669e-07	0.495774	0.000335911	1	1	0	1
ENSG00000112787	FBRSL1	protein_coding	Q9HCM7	0.707413	9.41175e-05	0.399325	0.0351498	0	1	0	1
ENSG00000113083	LOX	protein_coding	P28300	0.437546	0.0150042	0.520083	0.00955166	1	1	0	1
ENSG00000114646	CSPG5	protein_coding	O95196	1.24247	7.77801e-15	0.589277	0.00152563	1	0	0	1
ENSG00000114650	SCAP	protein_coding	Q12770	0.581408	1.56746e-08	0.433084	4.64537e-05	1	0	0	1
ENSG00000115275	MOGS	protein_coding	Q13724	0.915482	1.87047e-18	0.475206	0.000197908	1	1	0	1
ENSG00000115414	FN1	protein_coding	P02751	0.702062	1.9973e-11	0.349328	0.00673243	1	1	0	1
ENSG00000116106	EPHA4	protein_coding	P54764	1.01572	1.11366e-18	0.426508	0.00150304	1	1	0	1
ENSG00000116691	MIIP	protein_coding	Q5JXC2	0.880872	4.54001e-09	0.478	0.00903463	0	0	0	0
ENSG00000116962	NID1	protein_coding	P14543	0.858504	1.26908e-23	0.35659	0.000481169	1	1	0	1
ENSG00000117411	B4GALT2	protein_coding	O60909	0.989445	5.36698e-10	0.802423	6.04932e-06	1	1	0	1
ENSG00000117479	SLC19A2	protein_coding	O60779	0.500004	0.00560159	0.446924	0.027	1	0	0	1
ENSG00000118046	STK11	protein_coding	Q15831	0.549842	2.10383e-06	0.31508	0.0073467	1	0	0	1
ENSG00000121039	RDH10	protein_coding	Q8IZV5	0.596983	3.30051e-06	0.418102	0.00744533	1	1	0	1
ENSG00000121057	AKAP1	protein_coding	Q92667	0.325159	0.00517284	0.325706	0.0234111	1	0	1	0
ENSG00000122490	PQLC1	protein_coding	Q8N2U9	0.980868	4.13073e-10	0.568023	0.00142256	1	0	0	1
ENSG00000123739	PLA2G12A	protein_coding	Q9BZM1	0.8703	2.4305e-11	0.567883	9.56255e-05	1	1	0	1
ENSG00000124313	IQSEC2	protein_coding	Q5JU85	0.550253	0.0479399	0.641327	0.0241389	0	1	0	1
ENSG00000124574	ABCC10	protein_coding	Q5T3U5	0.420667	0.0131615	0.423929	0.0280912	1	0	0	1
ENSG00000124608	AARS2	protein_coding	Q5JTZ9	0.551173	3.97262e-07	0.480132	3.10686e-05	0	0	1	0
ENSG00000124783	SSR1	protein_coding	P43307	0.710203	1.0728e-20	0.324264	0.000127353	1	1	0	1
ENSG00000125648	SLC25A23	protein_coding	Q9BV35	0.488484	0.000845206	0.350571	0.034145	1	0	1	0
ENSG00000125826	RBCK1	protein_coding	Q9BYM8	0.681553	0.008019	0.585487	0.0478223	0	0	0	0
ENSG00000125844	RRBP1	protein_coding	Q9P2E9	0.658757	1.28043e-10	0.45711	5.1556e-05	1	1	0	1
ENSG00000126062	TMEM115	protein_coding	Q12893	1.18605	1.11256e-20	0.629983	2.6272e-06	1	1	0	1
ENSG00000126215	XRCC3	protein_coding	O43542	0.646556	0.00158034	0.556167	0.0218946	0	0	0	0
ENSG00000127463	EMC1	protein_coding	Q8N766	0.461065	2.27073e-07	0.414347	0.000285232	1	1	0	1
ENSG00000128159	TUBGCP6	protein_coding	Q96RT7	0.30828	0.00364035	0.346316	0.00336217	1	0	0	1
ENSG00000128713	HOXD11	protein_coding	P31277	1.30464	7.08159e-13	0.600106	0.00232133	0	0	0	0
ENSG00000128973	CLN6	protein_coding	Q9NWW5	0.430032	0.000314442	0.372179	0.00606508	1	1	0	1
ENSG00000129128	SPCS3	protein_coding	P61009	0.469973	6.70289e-10	0.341506	5.29628e-05	1	0	0	1
ENSG00000129925	TMEM8A	protein_coding	Q9HCN3	0.638266	0.000218984	0.440323	0.030981	1	0	0	1
ENSG00000129933	MAU2	protein_coding	Q9Y6X3	0.557038	2.00433e-06	0.38663	0.00525146	0	1	0	1
ENSG00000130164	LDLR	protein_coding	P01130	0.40318	0.000469807	0.422803	0.000851457	1	1	0	1
ENSG00000130382	MLLT1	protein_coding	Q03111	0.603958	1.18824e-07	0.386696	0.00136114	0	0	0	0
ENSG00000130714	POMT1	protein_coding	Q9Y6A1	0.607296	1.43648e-07	0.3315	0.0139315	1	1	0	1
ENSG00000130733	YIPF2	protein_coding	Q9BWQ6	0.835526	3.53223e-18	0.307063	0.00941093	1	1	0	1
ENSG00000130821	SLC6A8	protein_coding	P48029	0.497259	0.000579877	0.420463	0.0111173	1	0	0	1
ENSG00000131067	GGT7	protein_coding	Q9UJ14	1.02113	1.6117e-13	0.406479	0.0146884	1	1	0	1
ENSG00000131323	TRAF3	protein_coding	Q13114	0.389978	0.0128226	0.393988	0.0247612	1	0	0	1
ENSG00000131584	ACAP3	protein_coding	Q96P50	0.468739	0.0240973	0.471796	0.0443683	0	1	0	1
ENSG00000132182	NUP210	protein_coding	Q8TEM1	0.465966	5.64295e-08	0.38389	9.56255e-05	1	0	0	1
ENSG00000132361	CLUH	protein_coding	O75153	0.668097	1.41239e-10	0.318613	0.00968317	0	1	0	1
ENSG00000132382	MYBBP1A	protein_coding	Q9BQG0	0.591055	5.42085e-11	0.341294	0.00197046	1	1	0	1
ENSG00000132635	PCED1A	protein_coding	Q9H1Q7	0.578665	0.00127825	0.610777	0.00741418	0	0	0	0
ENSG00000132763	MMACHC	protein_coding	Q9Y4U1	1.80199	2.1424e-31	0.440598	0.0226879	0	1	1	1
ENSG00000132781	MUTYH	protein_coding	Q9UIF7	0.541527	0.00869821	0.498094	0.0300725	0	0	1	0
ENSG00000133275	CSNK1G2	protein_coding	P78368	0.421554	0.00929776	0.375389	0.045439	1	1	0	1
ENSG00000134013	LOXL2	protein_coding	Q9Y4K0	1.0606	2.1299e-05	0.578247	0.0386108	1	1	0	1
ENSG00000134153	EMC7	protein_coding	Q9NPA0	1.42564	8.97759e-47	0.312712	0.019111	1	0	0	1
ENSG00000134250	NOTCH2	protein_coding	Q04721	0.412007	1.59283e-05	0.415307	9.15661e-05	1	1	0	1
ENSG00000134285	FKBP11	protein_coding	Q9NYL4	0.42227	0.0186808	0.656929	0.00150574	1	1	0	1
ENSG00000134294	SLC38A2	protein_coding	Q96QD8	0.62036	1.11723e-10	0.38279	0.00114602	1	1	0	1
ENSG00000134762	DSC3	protein_coding	Q14574	0.357965	2.17684e-05	0.421521	4.55897e-06	1	1	0	1
ENSG00000134824	FADS2	protein_coding	O95864	0.862535	1.16598e-16	0.339246	0.0161765	1	0	0	1
ENSG00000135503	ACVR1B	protein_coding	P36896	0.908483	8.52208e-12	0.400205	0.00974585	1	0	0	1
ENSG00000135506	OS9	protein_coding	Q13438	0.809382	8.77273e-21	0.341514	0.00130317	1	1	0	1
ENSG00000136026	CKAP4	protein_coding	Q07065	0.532352	9.54322e-10	0.375106	0.00212716	1	0	0	1
ENSG00000136295	TTYH3	protein_coding	Q9C0H2	0.604836	1.68645e-05	0.343179	0.0417087	1	0	0	1
ENSG00000136699	SMPD4	protein_coding	Q9NXE4	0.408252	0.000696542	0.345115	0.0138943	1	0	0	1
ENSG00000136943	CTSV	protein_coding	O60911	0.39323	0.00178469	0.430308	0.00276401	1	1	0	1
ENSG00000138459	SLC35A5	protein_coding	Q9BS91	0.525191	0.00014045	0.547694	0.000270102	1	1	0	1
ENSG00000138759	FRAS1	protein_coding	Q86XX4	0.357318	0.00686067	0.35853	0.0367715	1	1	0	1
ENSG00000138760	SCARB2	protein_coding	Q14108	0.628429	2.38874e-10	0.312278	0.0115919	1	0	0	1
ENSG00000138829	FBN2	protein_coding	P35556	0.328414	0.00382227	0.544335	5.87602e-06	1	1	0	1
ENSG00000138834	MAPK8IP3	protein_coding	Q9UPT6	0.367496	0.0159418	0.452707	0.0122076	1	1	0	1
ENSG00000139182	CLSTN3	protein_coding	Q9BQT9	0.50872	0.00016367	0.31262	0.0471006	1	1	0	1
ENSG00000139219	COL2A1	protein_coding	P02458	0.787396	2.28164e-13	0.437571	0.000452951	1	1	0	1
ENSG00000139514	SLC7A1	protein_coding	P30825	0.494971	5.55551e-10	0.480099	8.62284e-09	1	0	0	1
ENSG00000139631	CSAD	protein_coding	Q9Y600	0.965274	2.86696e-07	0.463856	0.0361645	0	1	0	1
ENSG00000139880	CDH24	protein_coding	Q86UP0	1.29177	2.44791e-06	0.642321	0.0281522	1	1	0	1
ENSG00000140400	MAN2C1	protein_coding	Q9NTJ4	0.384044	0.03772	0.459702	0.029875	0	0	0	0
ENSG00000140451	PIF1	protein_coding	Q9H611	0.702535	0.000285884	0.555267	0.00810975	0	0	1	0
ENSG00000140474	ULK3	protein_coding	Q6PHR2	0.33585	0.0111439	0.47464	0.0011797	1	0	0	1
ENSG00000140983	RHOT2	protein_coding	Q8IXI1	0.714538	1.93536e-09	0.32226	0.0247169	1	0	1	0
ENSG00000142156	COL6A1	protein_coding	P12109	0.487921	6.01349e-05	0.321397	0.0252303	1	1	0	1
ENSG00000142892	PIGK	protein_coding	Q92643	0.608195	5.10633e-13	0.361378	0.000360904	1	1	0	1
ENSG00000143258	USP21	protein_coding	Q9UK80	0.717827	0.000232438	0.583997	0.00771122	1	1	0	1
ENSG00000143315	PIGM	protein_coding	Q9H3S5	0.541963	1.95413e-05	0.360478	0.0127051	1	0	0	1
ENSG00000143537	ADAM15	protein_coding	Q13444	0.587216	7.08797e-06	0.327555	0.0343442	1	1	0	1
ENSG00000143543	JTB	protein_coding	O76095	0.674359	2.99125e-10	0.421694	0.00119602	1	1	0	1
ENSG00000145860	RNF145	protein_coding	Q96MT1	0.44165	0.0300023	0.517705	0.0202441	1	1	0	1
ENSG00000146350	TBC1D32	protein_coding	Q96NH3	0.936138	5.27834e-12	0.370601	0.0325945	0	0	0	0
ENSG00000146826	C7orf43	protein_coding	Q8WVR3	0.911091	0.000144216	0.631516	0.0280912	1	1	0	1
ENSG00000146830	GIGYF1	protein_coding	O75420	0.429641	0.00388779	0.442006	0.00867999	0	1	0	1
ENSG00000147027	TMEM47	protein_coding	Q9BQJ4	1.01199	2.28085e-10	0.386998	0.0405828	1	0	0	1
ENSG00000147852	VLDLR	protein_coding	P98155	0.483983	0.0186205	0.664512	0.00295362	1	1	0	1
ENSG00000148384	INPP5E	protein_coding	Q9NRR6	0.700106	6.51081e-05	0.410115	0.0359928	1	0	0	1
ENSG00000148400	NOTCH1	protein_coding	P46531	1.18113	3.38974e-15	0.38344	0.0256995	1	0	0	1
ENSG00000149150	SLC43A1	protein_coding	O75387	0.908069	8.75585e-13	0.346315	0.0227851	1	1	0	1
ENSG00000149294	NCAM1	protein_coding	P13591	0.624949	0.000136851	0.434803	0.0170732	1	1	0	1
ENSG00000150403	TMCO3	protein_coding	Q6UWJ1	0.333247	0.00771462	0.501653	0.00020356	1	0	0	1
ENSG00000150893	FREM2	protein_coding	Q5SZK8	0.492971	8.44969e-05	0.506147	0.000236217	1	0	0	1
ENSG00000150967	ABCB9	protein_coding	Q9NP78	0.664644	0.00532212	0.56481	0.038215	1	1	1	1
ENSG00000151012	SLC7A11	protein_coding	Q9UPY5	0.401684	0.000245294	0.352708	0.00525975	1	1	0	1
ENSG00000151498	ACAD8	protein_coding	Q9UKU7	0.6241	6.791e-06	0.35088	0.0359475	0	0	1	0
ENSG00000151694	ADAM17	protein_coding	P78536	0.366457	0.0049726	0.432989	0.00258267	1	1	0	1
ENSG00000153786	ZDHHC7	protein_coding	Q9NXF8	0.490354	0.000441337	0.341744	0.0412498	1	1	0	1
ENSG00000155254	MARVELD1	protein_coding	Q9BSK0	1.79333	1.21309e-23	0.717664	9.6981e-05	1	0	0	1
ENSG00000155304	HSPA13	protein_coding	P48723	0.685531	1.33027e-20	0.400045	8.18316e-07	1	1	0	1
ENSG00000157593	SLC35B2	protein_coding	Q8TB61	1.30708	3.35209e-32	0.465442	0.00249966	1	1	0	1
ENSG00000157637	SLC38A10	protein_coding	Q9HBR0	0.477355	0.000193213	0.409355	0.00808465	1	1	0	1
ENSG00000158669	GPAT4	protein_coding	Q86UL3	0.431886	0.00089445	0.339843	0.0205563	1	0	0	1
ENSG00000159069	FBXW5	protein_coding	Q969U6	0.38736	0.00706338	0.417562	0.00610401	0	0	0	0
ENSG00000159164	SV2A	protein_coding	Q7L0J3	0.381405	0.00665018	0.367428	0.0198697	1	0	0	1
ENSG00000160058	BSDC1	protein_coding	#N/A	1.02612	8.00386e-23	0.316617	0.00820819	0	1	0	1
ENSG00000160298	C21orf58	protein_coding	#N/A	0.32253	0.032105	0.371794	0.0172904	0	0	0	0
ENSG00000160305	DIP2A	protein_coding	Q14689	0.322899	0.00908627	0.464365	0.000191269	0	0	0	0
ENSG00000160447	PKN3	protein_coding	Q6P5Z2	0.863537	6.75687e-08	0.443722	0.014256	1	1	0	1
ENSG00000160957	RECQL4	protein_coding	O94761	0.474527	0.000312399	0.353481	0.0281522	1	0	1	0
ENSG00000161996	WDR90	protein_coding	Q96KV7	0.478328	0.00563854	0.531818	0.00734023	0	1	0	1
ENSG00000162298	SYVN1	protein_coding	Q86TM6	0.758378	3.45151e-16	0.454894	5.08213e-06	1	1	0	1
ENSG00000162695	SLC30A7	protein_coding	Q8NEW0	0.371558	0.00532576	0.55925	0.000103819	1	1	0	1
ENSG00000162729	IGSF8	protein_coding	Q969P0	0.904965	7.93115e-07	0.519801	0.014319	1	1	0	1
ENSG00000162769	FLVCR1	protein_coding	Q9Y5Y0	1.22868	2.31055e-20	0.414593	0.0220981	1	1	0	1
ENSG00000163428	LRRC58	protein_coding	#N/A	0.865779	1.15601e-13	0.300133	0.0403221	0	0	0	0
ENSG00000163933	RFT1	protein_coding	Q96AA3	0.548868	3.51693e-06	0.41496	0.00212532	1	1	0	1
ENSG00000164180	TMEM161B	protein_coding	Q8NDZ6	0.492045	0.00192124	0.379199	0.038215	1	0	0	1
ENSG00000164291	ARSK	protein_coding	Q6UWY0	1.0704	2.11572e-12	0.399161	0.011201	1	1	0	1
ENSG00000164307	ERAP1	protein_coding	Q9NZ08	1.22594	1.84663e-15	0.557958	0.00323921	1	1	0	1
ENSG00000164853	UNCX	protein_coding	A6NJT0	0.955031	4.61279e-05	0.550432	0.0370098	0	0	0	0
ENSG00000164880	INTS1	protein_coding	Q8N201	0.362799	0.00327425	0.338437	0.015315	1	0	0	1
ENSG00000164896	FASTK	protein_coding	Q14296	0.898801	4.00977e-10	0.555518	0.00142571	0	0	1	0
ENSG00000164897	TMUB1	protein_coding	Q9BVT8	0.975011	4.20675e-11	0.461812	0.00518979	1	1	0	1
ENSG00000165282	PIGO	protein_coding	Q8TEQ8	0.536514	4.75534e-05	0.419912	0.00424309	1	0	0	1
ENSG00000165389	SPTSSA	protein_coding	Q969W0	1.45115	4.08774e-29	0.316524	0.0304454	1	0	0	1
ENSG00000165661	QSOX2	protein_coding	Q6ZRP7	0.451295	7.82288e-05	0.348294	0.0053486	1	1	0	1
ENSG00000165915	SLC39A13	protein_coding	Q96H72	1.08483	3.31701e-08	0.527208	0.0170283	1	0	0	1
ENSG00000166147	FBN1	protein_coding	P35555	0.642639	1.41251e-05	0.693186	1.79062e-06	1	1	0	1
ENSG00000167378	IRGQ	protein_coding	Q8WZA9	0.840172	7.44399e-17	0.336256	0.00589282	0	1	0	1
ENSG00000167700	MFSD3	protein_coding	Q96ES6	0.769767	3.50447e-05	0.533051	0.0126897	1	1	0	1
ENSG00000167702	KIFC2	protein_coding	Q96AC6	1.35437	2.25087e-16	0.421698	0.0303783	0	1	0	1
ENSG00000167992	VWCE	protein_coding	Q96DN2	0.60845	0.0223087	0.680554	0.0206427	1	1	0	1
ENSG00000168028	RPSA	protein_coding	P08865	0.524044	1.38132e-06	0.401444	0.00354539	1	1	0	1
ENSG00000168216	LMBRD1	protein_coding	Q9NUN5	0.743316	3.6542e-10	0.348411	0.0105793	1	0	0	1
ENSG00000168701	TMEM208	protein_coding	Q9BTX3	1.07058	4.4168e-14	0.371556	0.0169325	1	0	0	1
ENSG00000169359	SLC33A1	protein_coding	O00400	0.309035	0.000622574	0.396382	3.24756e-05	1	0	0	1
ENSG00000169567	HINT1	protein_coding	P49773	0.717332	1.02335e-18	0.349924	0.002996	1	1	1	1
ENSG00000169951	ZNF764	protein_coding	Q96H86	0.471102	0.0207973	0.432161	0.0339971	0	0	0	0
ENSG00000170522	ELOVL6	protein_coding	Q9H5J4	1.56679	4.39179e-29	0.496971	0.00531143	1	0	0	1
ENSG00000171004	HS6ST2	protein_coding	Q96MM7	1.36817	8.04097e-38	0.46271	7.56652e-05	1	1	0	1
ENSG00000171246	NPTX1	protein_coding	Q15818	1.00513	1.31181e-10	0.337351	0.0471006	1	1	0	1
ENSG00000171298	GAA	protein_coding	P10253	0.96581	8.20215e-20	0.71731	7.9599e-10	1	0	0	1
ENSG00000171307	ZDHHC16	protein_coding	Q969W1	0.414686	0.00676183	0.446295	0.00926111	1	0	0	1
ENSG00000171603	CLSTN1	protein_coding	O94985	0.491083	7.17208e-09	0.340226	0.000221129	1	0	0	1
ENSG00000172037	LAMB2	protein_coding	P55268	0.867878	3.67219e-15	0.380664	0.00313982	1	1	0	1
ENSG00000172301	COPRS	protein_coding	Q9NQ92	1.35812	6.94133e-32	0.308601	0.0125207	1	1	0	1
ENSG00000172889	EGFL7	protein_coding	Q9UHF1	1.78293	1.48603e-21	0.52027	0.00846548	1	1	0	1
ENSG00000173638	SLC19A1	protein_coding	P41440	0.791083	4.03446e-09	0.395255	0.00831537	1	1	0	1
ENSG00000173705	SUSD5	protein_coding	O60279	0.791141	5.95755e-08	0.566446	0.000455588	1	1	0	1
ENSG00000174106	LEMD3	protein_coding	Q9Y2U8	0.415292	5.16026e-05	0.311757	0.0131789	1	0	0	1
ENSG00000174276	ZNHIT2	protein_coding	Q9UHR6	0.941122	4.23447e-06	0.521972	0.0220224	0	0	0	0
ENSG00000174437	ATP2A2	protein_coding	P16615	0.432776	3.65262e-09	0.383627	2.51471e-06	1	0	0	1
ENSG00000174669	SLC29A2	protein_coding	Q14542	0.484954	0.00336337	0.519689	0.00758385	1	0	0	1
ENSG00000175634	RPS6KB2	protein_coding	Q9UBS0	1.03086	1.61299e-13	0.577998	0.000114731	0	0	0	0
ENSG00000176155	CCDC57	protein_coding	Q2TAC2	0.484115	0.0100486	0.44341	0.041637	0	0	0	0
ENSG00000176248	ANAPC2	protein_coding	Q9UJX6	0.668593	8.44856e-08	0.344493	0.0162151	0	0	0	0
ENSG00000177595	PIDD1	protein_coding	Q9HB75	0.715669	1.07801e-06	0.393628	0.0196308	1	1	0	1
ENSG00000177728	TMEM94	protein_coding	Q12767	0.336639	0.0200274	0.449121	0.00553458	1	1	0	1
ENSG00000178531	CTXN1	protein_coding	P60606	1.52462	3.02039e-12	0.566416	0.0208379	1	1	0	1
ENSG00000181027	FKRP	protein_coding	Q9H9S5	0.442353	0.0109352	0.464394	0.0172904	1	1	0	1
ENSG00000182087	TMEM259	protein_coding	Q4ZIN3	1.20065	2.73751e-21	0.660189	2.59914e-06	1	1	0	1
ENSG00000183291	SELENOF	protein_coding	O60613	1.24224	2.64038e-38	0.528212	4.18781e-06	1	1	0	1
ENSG00000183722	LHFP	protein_coding	#N/A	1.3848	3.43383e-13	0.466192	0.0257464	0	0	0	0
ENSG00000184381	PLA2G6	protein_coding	O60733	0.6374	0.00514296	0.66909	0.00975742	1	0	0	1
ENSG00000184916	JAG2	protein_coding	Q9Y219	1.43485	9.52229e-25	0.504341	0.00330885	1	1	0	1
ENSG00000185090	MANEAL	protein_coding	Q5VSG8	0.470832	0.0390455	0.486613	0.0438493	1	1	0	1
ENSG00000185164	NOMO2	protein_coding	Q5JPE7	1.57105	2.23629e-40	0.636391	1.37165e-05	1	0	0	1
ENSG00000185324	CDK10	protein_coding	Q15131	0.562275	0.00216169	0.55437	0.00624583	0	0	0	0
ENSG00000185504	FAAP100	protein_coding	Q0VG06	0.652373	1.3077e-05	0.378846	0.030963	0	0	0	0
ENSG00000185800	DMWD	protein_coding	Q09019	0.473151	0.00150282	0.402786	0.0160382	0	1	0	1
ENSG00000187498	COL4A1	protein_coding	P02462	0.619142	0.000860341	0.44794	0.0378709	1	1	0	1
ENSG00000187634	SAMD11	protein_coding	Q96NU1	0.579764	0.00209285	0.446187	0.0391233	0	1	0	1
ENSG00000187961	KLHL17	protein_coding	Q6TDP4	1.06691	4.43519e-05	0.653367	0.0259061	1	0	0	1
ENSG00000188191	PRKAR1B	protein_coding	P31321	1.12639	1.08285e-12	0.385588	0.0463787	1	0	0	1
ENSG00000188315	C3orf62	protein_coding	Q6ZUJ4	0.482697	0.0428281	0.634031	0.0211739	0	0	0	0
ENSG00000196187	TMEM63A	protein_coding	O94886	0.743967	1.43229e-07	0.454354	0.00565292	1	1	0	1
ENSG00000196378	ZNF34	protein_coding	Q8IZ26	1.11757	4.14464e-08	0.557869	0.0281543	0	1	0	1
ENSG00000196498	NCOR2	protein_coding	Q9Y618	0.443294	0.000872158	0.423097	0.00182058	1	0	0	1
ENSG00000196517	SLC6A9	protein_coding	P48067	0.764569	9.60847e-09	0.513991	0.00330885	1	1	0	1
ENSG00000197324	LRP10	protein_coding	Q7Z4F1	0.45733	0.00634401	0.402267	0.0330466	1	0	0	1
ENSG00000197565	COL4A6	protein_coding	Q14031	0.839102	0.000141908	0.50688	0.048499	1	1	0	1
ENSG00000198208	RPS6KL1	protein_coding	Q9Y6S9	0.714474	5.63243e-06	0.450812	0.019877	0	0	0	0
ENSG00000198885	ITPRIPL1	protein_coding	Q6GPH6	0.41392	0.0364227	0.473048	0.0365014	1	0	0	1
ENSG00000205476	CCDC85C	protein_coding	A6NKD9	0.6992	3.05166e-08	0.363017	0.00370905	0	1	0	1
ENSG00000205903	ZNF316	protein_coding	A6NFI3	0.542843	1.36805e-05	0.363243	0.0124207	0	0	0	0
ENSG00000213995	NAXD	protein_coding	Q8IW45	0.472839	0.0032917	0.429393	0.00618194	0	0	1	0
ENSG00000214160	ALG3	protein_coding	Q92685	0.77059	3.57351e-08	0.414852	0.00919331	1	0	0	1
ENSG00000214655	ZSWIM8	protein_coding	A7E2V4	0.400693	0.00138796	0.399834	0.0047681	0	1	0	1
ENSG00000214706	IFRD2	protein_coding	Q12894	0.851622	6.65713e-10	0.544841	0.000387396	0	0	0	0
ENSG00000225663	MCRIP1	protein_coding	C9JLW8	0.664371	1.29603e-05	0.451642	0.012134	0	0	0	0
ENSG00000226479	TMEM185B	protein_coding	Q9H7F4	1.30668	5.43258e-12	0.473587	0.0163978	1	1	0	1
ENSG00000233276	GPX1	protein_coding	P07203	0.633027	9.90258e-08	0.311379	0.0340357	0	0	1	0
ENSG00000238227	C9orf69	protein_coding	#N/A	0.631661	1.22159e-05	0.496928	0.00384985	0	0	0	0
ENSG00000266967	AARSD1	protein_coding	Q9BTE6	0.653154	0.0040353	0.584347	0.0226879	0	0	0	0
ENSG00000272391	POM121C	protein_coding	A8CG34	0.423842	0.0147516	0.392623	0.0228114	1	0	0	1

## Sheet: Unfiltered data
Ensemble Gene ID	Gene name	Gene type	UniprotID	Log2 (ERM Tg E/I)	P-adj (ERM Tg E/I)	Log2 (Enrich Tg E/N)	P-adj (Enrich Tg E/N)	GOCC secretome	HPA secretome	MitoCarta	Secretome
ENSG00000000003	TSPAN6	protein_coding	O43657	-0.260335	0.0192742	-0.0143423	0.946116	1	0	0	1
ENSG00000000005	TNMD	protein_coding	Q9H2S6	1.0581	0.431547	1.07844	NA	1	0	0	1
ENSG00000000419	DPM1	protein_coding	O60762	-0.365682	0.00040166	-0.273029	0.027	1	0	0	1
ENSG00000000457	SCYL3	protein_coding	Q8IZE3	-0.202988	0.36749	0.0478985	0.885438	1	0	0	1
ENSG00000000460	C1orf112	protein_coding	#N/A	0.0877404	0.595898	0.222307	0.172095	0	0	0	0
ENSG00000000938	FGR	protein_coding	P09769	NA	NA	-1.02551	NA	1	1	0	1
ENSG00000000971	CFH	protein_coding	P08603	0.299238	NA	-1.31606	NA	1	1	0	1
ENSG00000001036	FUCA2	protein_coding	Q9BTY2	-0.0456911	0.805096	0.219203	0.168405	1	1	0	1
ENSG00000001084	GCLC	protein_coding	P48506	-0.268699	0.0528344	0.237328	0.172147	0	0	0	0
ENSG00000001167	NFYA	protein_coding	P23511	-0.242332	0.189331	-0.171529	0.429724	0	0	0	0
ENSG00000001460	STPG1	protein_coding	Q5TH74	-0.793938	1.76873e-05	-0.179478	0.553418	0	0	0	0
ENSG00000001461	NIPAL3	protein_coding	Q6P499	0.353363	0.0418965	0.397912	0.0397532	1	0	0	1
ENSG00000001497	LAS1L	protein_coding	Q9Y4W2	-0.0453011	0.748239	-0.26855	0.015337	1	0	0	1
ENSG00000001561	ENPP4	protein_coding	Q9Y6X5	-0.237079	0.269541	0.240591	0.344626	1	0	0	1
ENSG00000001617	SEMA3F	protein_coding	Q13275	0.485588	0.181029	0.262468	NA	1	1	0	1
ENSG00000001626	CFTR	protein_coding	P13569	0.449428	NA	2.22243	NA	1	0	0	1
ENSG00000001629	ANKIB1	protein_coding	Q9P2G1	-0.192919	0.409027	0.230651	0.408984	0	1	0	1
ENSG00000001630	CYP51A1	protein_coding	Q16850	1.09381	6.58049e-05	0.0328457	0.943817	1	1	0	1
ENSG00000001631	KRIT1	protein_coding	O00522	-0.845359	9.54897e-08	0.0363971	0.922925	1	1	0	1
ENSG00000002016	RAD52	protein_coding	P43351	-0.103105	0.624026	0.1047	0.654261	0	1	0	1
ENSG00000002079	MYH16	unitary_pseudogene	Q9H6N6	-0.177642	0.855202	1.33167	NA	0	0	0	0
ENSG00000002330	BAD	protein_coding	Q92934	0.358184	0.139438	-0.0821537	0.814219	0	0	1	0
ENSG00000002549	LAP3	protein_coding	P28838	0.036365	0.823581	-0.367109	0.00133154	0	0	1	0
ENSG00000002586	CD99	protein_coding	P14209	0.997997	4.06079e-19	0.138353	0.348166	1	1	0	1
ENSG00000002587	HS3ST1	protein_coding	O14792	0.940271	NA	0.898042	NA	1	1	0	1
ENSG00000002726	AOC1	protein_coding	P19801	NA	NA	NA	NA	1	1	0	1
ENSG00000002745	WNT16	protein_coding	Q9UBV4	0.45311	NA	-0.816493	NA	1	1	0	1
ENSG00000002746	HECW1	protein_coding	Q76N89	0.21344	NA	-1.18503	NA	0	0	0	0
ENSG00000002822	MAD1L1	protein_coding	Q9Y6D9	0.560195	2.28723e-06	0.086922	0.620355	0	1	0	1
ENSG00000002834	LASP1	protein_coding	Q14847	-0.155046	0.455278	-0.530531	0.00215824	0	1	0	1
ENSG00000002919	SNX11	protein_coding	Q9Y5W9	0.388211	0.0503054	0.162655	0.49284	1	0	0	1
ENSG00000002933	TMEM176A	protein_coding	Q96HP8	NA	NA	NA	NA	1	0	0	1
ENSG00000003056	M6PR	protein_coding	P20645	0.612086	1.50155e-08	0.0970735	0.542711	1	1	0	1
ENSG00000003096	KLHL13	protein_coding	Q9P2N7	-0.270432	0.201156	-0.134684	0.613794	0	0	0	0
ENSG00000003137	CYP26B1	protein_coding	Q9NR63	0.173495	0.758324	0.0553239	NA	1	1	0	1
ENSG00000003147	ICA1	protein_coding	Q05084	-0.344525	0.330196	0.135937	NA	1	1	0	1
ENSG00000003249	DBNDD1	protein_coding	Q9H9R9	0.230603	0.554476	0.417034	NA	0	0	0	0
ENSG00000003393	ALS2	protein_coding	Q96Q42	-0.36063	0.0307039	0.0228699	0.946116	1	0	0	1
ENSG00000003400	CASP10	protein_coding	Q92851	-0.519188	0.0605195	-0.371829	NA	0	1	0	1
ENSG00000003402	CFLAR	protein_coding	O15519	0.257209	0.237221	0.363913	0.128305	0	1	0	1
ENSG00000003436	TFPI	protein_coding	P10646	-0.189972	0.599108	0.252078	NA	1	1	0	1
ENSG00000003509	NDUFAF7	protein_coding	Q7L592	-0.13621	0.642296	-0.231982	0.404948	1	0	1	0
ENSG00000003756	RBM5	protein_coding	P52756	-0.290273	0.0115885	0.0922748	0.593985	0	0	0	0
ENSG00000003987	MTMR7	protein_coding	Q9Y216	0.509779	0.252812	-0.275803	NA	1	0	0	1
ENSG00000003989	SLC7A2	protein_coding	P52569	0.112959	0.607394	0.192801	0.376422	1	1	0	1
ENSG00000004059	ARF5	protein_coding	P84085	0.403082	2.28581e-05	-0.222567	0.0385707	1	0	1	0
ENSG00000004139	SARM1	protein_coding	Q6SZW1	1.81604	5.99598e-20	0.535867	0.0126263	0	1	0	1
ENSG00000004142	POLDIP2	protein_coding	Q9Y2S7	0.0910638	0.466702	-0.0330622	0.853255	0	0	1	0
ENSG00000004399	PLXND1	protein_coding	Q9Y4D7	0.408085	0.231049	0.353351	NA	1	0	0	1
ENSG00000004455	AK2	protein_coding	P54819	-0.137325	0.30234	-0.190134	0.15703	0	0	1	0
ENSG00000004468	CD38	protein_coding	P28907	-0.0347299	NA	2.33318	NA	1	1	0	1
ENSG00000004478	FKBP4	protein_coding	Q02790	0.333323	5.88691e-05	-0.263486	0.00525975	0	0	0	0
ENSG00000004487	KDM1A	protein_coding	O60341	0.0857777	0.456857	-0.0692192	0.596956	0	1	0	1
ENSG00000004534	RBM6	protein_coding	P78332	-0.182292	0.113655	0.163272	0.260655	0	0	0	0
ENSG00000004660	CAMKK1	protein_coding	Q8N5S9	0.223774	0.318113	0.197996	0.445237	0	0	0	0
ENSG00000004700	RECQL	protein_coding	P46063	-0.644823	6.16879e-11	-0.287528	0.0238203	1	0	0	1
ENSG00000004766	VPS50	protein_coding	Q96JG6	-0.496751	0.000627687	-0.147126	0.536121	1	1	0	1
ENSG00000004776	HSPB6	protein_coding	O14558	0.112259	0.913304	-0.28534	NA	1	0	0	1
ENSG00000004777	ARHGAP33	protein_coding	O14559	0.134456	0.836904	0.586069	NA	1	1	0	1
ENSG00000004779	NDUFAB1	protein_coding	O14561	0.453946	1.65907e-06	-0.325343	0.00549468	0	0	1	0
ENSG00000004799	PDK4	protein_coding	Q16654	-0.132744	0.882889	-0.299655	NA	0	0	1	0
ENSG00000004809	SLC22A16	protein_coding	Q86VW1	NA	NA	NA	NA	1	0	0	1
ENSG00000004838	ZMYND10	protein_coding	O75800	0.381803	0.674611	1.0464	NA	0	1	0	1
ENSG00000004846	ABCB5	protein_coding	Q2M3G0	1.87689	NA	2.79835	NA	1	0	0	1
ENSG00000004848	ARX	protein_coding	Q96QS3	1.94539	NA	-0.585621	NA	0	0	0	0
ENSG00000004864	SLC25A13	protein_coding	Q9UJS0	-0.00882131	0.956119	0.0253462	0.880897	1	0	1	0
ENSG00000004866	ST7	protein_coding	Q9NRC1	0.0790412	0.817692	0.239634	0.450383	1	0	0	1
ENSG00000004897	CDC27	protein_coding	P30260	-0.00762941	0.967181	0.186594	0.210415	0	0	0	0
ENSG00000004939	SLC4A1	protein_coding	P02730	-0.461326	NA	0.240435	NA	1	0	0	1
ENSG00000004948	CALCR	protein_coding	P30988	0.0394607	NA	-0.0181833	NA	1	1	0	1
ENSG00000004961	HCCS	protein_coding	P53701	-0.030235	0.898148	0.066591	0.769933	0	1	1	1
ENSG00000004975	DVL2	protein_coding	O14641	0.0519106	0.744547	0.0510555	0.776127	1	0	0	1
ENSG00000005001	PRSS22	protein_coding	Q9GZN4	NA	NA	NA	NA	1	1	0	1
ENSG00000005007	UPF1	protein_coding	Q92900	0.203787	0.0343979	-0.105994	0.386607	0	0	0	0
ENSG00000005020	SKAP2	protein_coding	O75563	0.475755	0.000403875	-0.106085	0.565336	1	0	0	1
ENSG00000005022	SLC25A5	protein_coding	P05141	-0.0315519	0.856016	-0.353983	0.00215824	1	0	1	0
ENSG00000005059	MCUB	protein_coding	Q9NWR8	0.700544	0.000201715	0.156282	0.550502	0	0	1	0
ENSG00000005073	HOXA11	protein_coding	P31270	-0.586623	0.000864716	0.0831852	0.800186	0	0	0	0
ENSG00000005075	POLR2J	protein_coding	P52435	0.252853	0.59233	0.201819	NA	0	0	0	0
ENSG00000005100	DHX33	protein_coding	Q9H6R0	0.234671	0.0260902	-0.065754	0.664819	0	0	0	0
ENSG00000005102	MEOX1	protein_coding	P50221	0.694544	NA	0.670958	NA	0	0	0	0
ENSG00000005108	THSD7A	protein_coding	Q9UPZ6	-0.460198	0.716351	-0.0535941	NA	1	0	0	1
ENSG00000005156	LIG3	protein_coding	P49916	0.309798	0.00751973	0.176328	0.207321	0	0	0	0
ENSG00000005175	RPAP3	protein_coding	Q9H6T3	-0.673176	1.1392e-13	-0.246586	0.0422313	0	0	0	0
ENSG00000005187	ACSM3	protein_coding	Q53FZ2	-0.492045	0.519756	0.268743	NA	0	0	1	0
ENSG00000005189	AC004381.6	protein_coding	#N/A	-0.547981	0.00121563	-0.156065	0.54248	0	1	0	1
ENSG00000005194	CIAPIN1	protein_coding	Q6FI81	0.2073	0.141515	-0.099183	0.555223	0	0	0	0
ENSG00000005206	SPPL2B	protein_coding	Q8TCT7	0.791623	0.000106056	0.643495	0.00709186	1	1	0	1
ENSG00000005238	FAM214B	protein_coding	Q7L5A3	0.126363	0.877449	0.206887	NA	0	0	0	0
ENSG00000005243	COPZ2	protein_coding	Q9P299	0.627726	0.55836	1.2046	NA	1	0	0	1
ENSG00000005249	PRKAR2B	protein_coding	P31323	0.0286461	0.940228	-0.160468	0.608483	1	1	0	1
ENSG00000005302	MSL3	protein_coding	Q8N5Y2	-0.463506	0.00187482	-0.366218	0.0458353	0	0	0	0
ENSG00000005339	CREBBP	protein_coding	Q92793	-0.261496	0.0046694	-0.178913	0.125633	0	0	0	0
ENSG00000005379	TSPOAP1	protein_coding	O95153	1.84717	NA	1.40142	NA	0	0	0	0
ENSG00000005381	MPO	protein_coding	P05164	-0.983282	NA	NA	NA	1	1	0	1
ENSG00000005421	PON1	protein_coding	P27169	NA	NA	NA	NA	1	1	0	1
ENSG00000005436	GCFC2	protein_coding	P16383	-0.291453	0.0484416	0.213674	0.273985	0	0	0	0
ENSG00000005448	WDR54	protein_coding	Q9H977	0.526036	0.00101826	0.189372	0.381345	0	1	0	1
ENSG00000005469	CROT	protein_coding	Q9UKG9	-0.0969104	0.797933	0.185151	NA	1	1	1	1
ENSG00000005471	ABCB4	protein_coding	P21439	-0.00534246	0.995235	0.202719	NA	1	1	0	1
ENSG00000005483	KMT2E	protein_coding	Q8IZD2	-0.728791	4.32236e-08	-0.052419	0.846254	1	0	0	1
ENSG00000005486	RHBDD2	protein_coding	Q6NTF9	0.230712	0.34332	0.29749	0.260549	1	1	0	1
ENSG00000005513	SOX8	protein_coding	P57073	0.696796	0.313114	0.356202	NA	0	0	0	0
ENSG00000005700	IBTK	protein_coding	Q9P2D0	0.508438	NA	1.43297	NA	1	0	0	1
ENSG00000005801	ZNF195	protein_coding	O14628	-0.253013	0.0692632	-0.269211	0.0789008	0	0	0	0
ENSG00000005810	MYCBP2	protein_coding	O75592	-0.423077	6.1997e-06	0.238267	0.071268	1	1	0	1
ENSG00000005812	FBXL3	protein_coding	Q9UKT7	-0.721251	2.08569e-10	-0.2881	0.0514565	0	0	0	0
ENSG00000005844	ITGAL	protein_coding	P20701	2.42987	NA	0.787237	NA	1	1	0	1
ENSG00000005882	PDK2	protein_coding	Q15119	-0.0946046	0.776473	-0.307288	0.291566	0	0	1	0
ENSG00000005884	ITGA3	protein_coding	P26006	0.341612	0.269219	0.354789	NA	1	1	0	1
ENSG00000005889	ZFX	protein_coding	P17010	-0.671367	9.26898e-11	-0.0010614	0.997156	0	0	0	0
ENSG00000005893	LAMP2	protein_coding	P13473	-0.013075	0.921011	-0.0212207	0.879016	1	0	0	1
ENSG00000005961	ITGA2B	protein_coding	P08514	0.295951	0.60245	0.263426	NA	1	0	0	1
ENSG00000005981	ASB4	protein_coding	Q9Y574	NA	NA	NA	NA	0	0	0	0
ENSG00000006007	GDE1	protein_coding	Q9NZC3	0.356316	0.0254036	0.0557998	0.82071	1	1	0	1
ENSG00000006015	C19orf60	protein_coding	#N/A	0.905958	0.000372557	0.305979	0.299073	0	1	0	1
ENSG00000006016	CRLF1	protein_coding	O75462	0.395093	0.719682	1.27735	NA	1	1	0	1
ENSG00000006025	OSBPL7	protein_coding	Q9BZF2	0.332186	0.528101	0.108188	NA	1	0	0	1
ENSG00000006042	TMEM98	protein_coding	Q9Y2Y6	0.374881	0.0400384	0.223237	0.32757	1	0	0	1
ENSG00000006047	YBX2	protein_coding	Q9Y2T7	1.08995	0.374562	0.22461	NA	0	0	0	0
ENSG00000006059	KRT33A	protein_coding	O76009	NA	NA	NA	NA	1	0	0	1
ENSG00000006062	MAP3K14	protein_coding	Q99558	0.0555542	0.892463	0.104352	NA	0	1	0	1
ENSG00000006071	ABCC8	protein_coding	Q09428	0.473824	0.485423	0.368397	NA	1	1	0	1
ENSG00000006116	CACNG3	protein_coding	O60359	NA	NA	NA	NA	1	0	0	1
ENSG00000006118	TMEM132A	protein_coding	Q24JP5	0.790361	2.71134e-05	0.179474	0.452826	1	0	0	1
ENSG00000006125	AP2B1	protein_coding	P63010	-0.307359	0.000366576	-0.223535	0.0275736	1	1	0	1
ENSG00000006128	TAC1	protein_coding	P20366	-0.320654	0.527466	0.302064	NA	1	1	0	1
ENSG00000006194	ZNF263	protein_coding	O14978	0.0303872	0.918357	0.0848528	0.761896	0	0	0	0
ENSG00000006210	CX3CL1	protein_coding	P78423	0.940271	NA	-0.0637278	NA	1	1	0	1
ENSG00000006282	SPATA20	protein_coding	Q8TB22	0.7631	0.00153507	0.557558	0.0460263	1	1	1	1
ENSG00000006283	CACNA1G	protein_coding	O43497	0.32394	0.794595	-0.0271845	NA	1	0	0	1
ENSG00000006327	TNFRSF12A	protein_coding	Q9NP84	1.09976	1.62062e-09	0.0730819	0.800553	1	1	0	1
ENSG00000006377	DLX6	protein_coding	P56179	-0.00352028	0.995686	-0.13827	NA	0	0	0	0
ENSG00000006432	MAP3K9	protein_coding	P80192	-0.122968	0.648215	0.219386	0.431625	0	1	0	1
ENSG00000006451	RALA	protein_coding	P11233	-0.0912131	0.650539	-0.132754	0.505571	1	0	0	1
ENSG00000006453	BAIAP2L1	protein_coding	Q9UHR4	-0.0164198	0.968526	-0.254555	0.445324	1	1	0	1
ENSG00000006459	KDM7A	protein_coding	Q6ZMT4	-0.255228	0.0564644	-0.106675	0.570524	0	1	0	1
ENSG00000006468	ETV1	protein_coding	P50549	-0.0502568	0.967623	-0.523526	NA	0	0	0	0
ENSG00000006530	AGK	protein_coding	Q53H12	-0.387577	0.0278307	-0.243262	0.294425	0	1	1	1
ENSG00000006534	ALDH3B1	protein_coding	P43353	0.511322	0.559938	0.404438	NA	1	0	0	1
ENSG00000006555	TTC22	protein_coding	#N/A	-2.0419	NA	NA	NA	0	0	0	0
ENSG00000006576	PHTF2	protein_coding	Q8N3S3	-0.712081	1.20171e-05	0.125845	0.669322	1	0	0	1
ENSG00000006606	CCL26	protein_coding	Q9Y258	0.940271	NA	0.898042	NA	1	1	0	1
ENSG00000006607	FARP2	protein_coding	O94887	-0.246537	0.0682139	-0.27524	0.0672587	0	0	0	0
ENSG00000006611	USH1C	protein_coding	Q9Y6N9	1.22982	0.059123	-0.0639356	NA	1	0	0	1
ENSG00000006625	GGCT	protein_coding	O75223	-0.169725	0.270475	-0.241203	0.159189	0	0	0	0
ENSG00000006634	DBF4	protein_coding	Q9UBU7	-0.415455	0.00672466	-0.164893	0.489183	0	0	0	0
ENSG00000006638	TBXA2R	protein_coding	P21731	1.10298	0.337212	0.0181788	NA	1	1	0	1
ENSG00000006652	IFRD1	protein_coding	O00458	-0.547134	5.45413e-08	0.0807922	0.604953	0	1	0	1
ENSG00000006659	LGALS14	protein_coding	Q8TCE9	NA	NA	NA	NA	0	0	0	0
ENSG00000006695	COX10	protein_coding	Q12887	-0.338204	0.176895	0.348724	0.253656	1	0	1	0
ENSG00000006704	GTF2IRD1	protein_coding	Q9UHL9	0.343483	0.103261	-0.103772	0.7073	0	0	0	0
ENSG00000006712	PAF1	protein_coding	Q8N7H5	0.130126	0.328549	-0.0335773	0.851854	1	0	0	1
ENSG00000006715	VPS41	protein_coding	P49754	-0.128822	0.394423	0.00818106	0.974355	1	0	0	1
ENSG00000006740	ARHGAP44	protein_coding	Q17R89	-0.209534	0.620581	0.136902	NA	0	0	0	0
ENSG00000006744	ELAC2	protein_coding	Q9BQ52	-0.0321943	0.852626	0.0261435	0.89874	0	0	1	0
ENSG00000006747	SCIN	protein_coding	Q9Y6U3	-0.0368757	0.978432	-0.209356	NA	1	1	0	1
ENSG00000006756	ARSD	protein_coding	P51689	-0.983282	NA	NA	NA	1	1	0	1
ENSG00000006757	PNPLA4	protein_coding	P41247	1.34486	0.00380379	0.156169	NA	0	1	0	1
ENSG00000006788	MYH13	protein_coding	Q9UKX3	NA	NA	-2.80783	NA	0	0	0	0
ENSG00000006831	ADIPOR2	protein_coding	Q86V24	0.534634	1.40429e-05	0.000508771	0.998898	1	0	0	1
ENSG00000006837	CDKL3	protein_coding	Q8IVW4	-0.320217	0.673999	-0.792384	NA	0	1	0	1
ENSG00000007001	UPP2	protein_coding	O95045	-1.8992	NA	NA	NA	0	1	0	1
ENSG00000007038	PRSS21	protein_coding	Q9Y6M0	0.940271	NA	-0.0637287	NA	1	1	0	1
ENSG00000007047	MARK4	protein_coding	Q96L34	0.558817	0.0245162	0.448616	0.118144	0	0	0	0
ENSG00000007062	PROM1	protein_coding	O43490	-0.555463	NA	0.834652	NA	1	1	0	1
ENSG00000007080	CCDC124	protein_coding	Q96CT7	0.783548	1.28615e-15	-0.163514	0.19095	1	1	0	1
ENSG00000007129	CEACAM21	protein_coding	Q3KPI0	NA	NA	NA	NA	1	0	0	1
ENSG00000007168	PAFAH1B1	protein_coding	P43034	-0.697314	9.29065e-14	-0.110017	0.461649	0	0	0	0
ENSG00000007171	NOS2	protein_coding	P35228	0.236708	0.824722	0.106796	NA	1	0	0	1
ENSG00000007174	DNAH9	protein_coding	Q9NYC9	-0.983282	NA	NA	NA	0	0	0	0
ENSG00000007202	KIAA0100	protein_coding	Q14667	0.0354114	0.875656	0.634338	0.000115426	1	1	1	1
ENSG00000007216	SLC13A2	protein_coding	Q13183	NA	NA	NA	NA	1	0	0	1
ENSG00000007237	GAS7	protein_coding	O60861	0.178824	0.820531	0.0425255	NA	1	1	0	1
ENSG00000007255	TRAPPC6A	protein_coding	O75865	0.738175	0.00150305	-0.0229326	0.955717	1	0	0	1
ENSG00000007264	MATK	protein_coding	P42679	0.662591	0.0209264	0.360475	NA	0	0	0	0
ENSG00000007306	CEACAM7	protein_coding	Q14002	NA	NA	NA	NA	1	1	0	1
ENSG00000007312	CD79B	protein_coding	P40259	-0.983282	NA	-1.02551	NA	1	1	0	1
ENSG00000007314	SCN4A	protein_coding	P35499	0.122758	0.883069	0.852807	NA	1	0	0	1
ENSG00000007341	ST7L	protein_coding	Q8TDW4	-0.16023	0.470183	0.128946	0.614779	1	0	0	1
ENSG00000007350	TKTL1	protein_coding	P51854	0.553639	NA	0.563653	NA	0	0	0	0
ENSG00000007372	PAX6	protein_coding	P26367	-0.0991567	0.608278	-0.168447	0.409374	0	0	0	0
ENSG00000007376	RPUSD1	protein_coding	Q9UJJ7	0.589977	9.54945e-06	0.194442	0.266075	0	1	0	1
ENSG00000007384	RHBDF1	protein_coding	Q96CC6	0.64446	0.0192077	0.52359	NA	1	1	0	1
ENSG00000007392	LUC7L	protein_coding	Q9NQ29	0.454475	0.000121305	-0.0654821	0.719849	0	0	0	0
ENSG00000007402	CACNA2D2	protein_coding	Q9NY47	0.494574	0.0122018	0.438587	0.0685834	1	1	0	1
ENSG00000007516	BAIAP3	protein_coding	O94812	0.110689	0.891945	0.126785	NA	1	0	0	1
ENSG00000007520	TSR3	protein_coding	Q9UJK0	1.11692	1.56255e-09	0.318201	0.15742	0	1	0	1
ENSG00000007541	PIGQ	protein_coding	Q9BRB3	0.54464	0.0217928	0.335417	0.250195	1	1	0	1
ENSG00000007545	CRAMP1	protein_coding	Q96RY5	-0.185083	0.549598	0.302895	NA	0	0	0	0
ENSG00000007866	TEAD3	protein_coding	Q99594	-0.116413	0.793219	-0.150441	NA	0	0	0	0
ENSG00000007908	SELE	protein_coding	P16581	0.0984031	NA	1.8705	NA	1	0	0	1
ENSG00000007923	DNAJC11	protein_coding	Q9NVH1	0.387025	9.96743e-06	-0.0284557	0.852322	0	0	1	0
ENSG00000007933	FMO3	protein_coding	P31513	NA	NA	NA	NA	1	1	0	1
ENSG00000007944	MYLIP	protein_coding	Q8WY64	-0.347527	0.2559	-0.017433	0.974355	1	0	0	1
ENSG00000007952	NOX1	protein_coding	Q9Y5S8	0.941267	NA	-0.11884	NA	1	0	0	1
ENSG00000007968	E2F2	protein_coding	Q14209	0.940271	NA	0.898042	NA	0	0	0	0
ENSG00000008018	PSMB1	protein_coding	P20618	0.540698	7.64038e-09	-0.204138	0.102744	1	0	0	1
ENSG00000008056	SYN1	protein_coding	P17600	0.0179784	0.978715	-0.323684	NA	1	0	0	1
ENSG00000008083	JARID2	protein_coding	Q92833	-0.209916	0.206457	0.170401	0.404948	0	0	0	0
ENSG00000008086	CDKL5	protein_coding	O76039	-0.547301	0.112628	-0.104256	NA	0	0	0	0
ENSG00000008118	CAMK1G	protein_coding	Q96NX5	-0.0888191	NA	1.72378	NA	1	0	0	1
ENSG00000008128	CDK11A	protein_coding	Q9UQ88	0.989367	0.239477	0.589605	NA	0	0	0	0
ENSG00000008130	NADK	protein_coding	O95544	0.193588	0.211	0.158202	0.38062	0	1	0	1
ENSG00000008196	TFAP2B	protein_coding	Q92481	NA	NA	-1.02551	NA	0	0	0	0
ENSG00000008197	TFAP2D	protein_coding	Q7Z6R9	NA	NA	NA	NA	0	0	0	0
ENSG00000008226	DLEC1	protein_coding	Q9Y238	1.34036	0.196797	3.33645	NA	0	0	0	0
ENSG00000008256	CYTH3	protein_coding	O43739	0.0450039	0.877624	0.215667	0.41961	1	0	0	1
ENSG00000008277	ADAM22	protein_coding	Q9P0K1	-0.0229906	0.95553	0.430132	NA	1	1	0	1
ENSG00000008282	SYPL1	protein_coding	Q16563	0.266265	0.0598722	0.168547	0.288161	1	0	0	1
ENSG00000008283	CYB561	protein_coding	P49447	0.62904	0.0024085	0.337439	0.198883	1	0	0	1
ENSG00000008294	SPAG9	protein_coding	O60271	-0.124908	0.246469	-0.0434303	0.785313	0	0	0	0
ENSG00000008300	CELSR3	protein_coding	Q9NYQ7	0.392172	0.00112962	0.495694	4.87846e-05	1	0	0	1
ENSG00000008311	AASS	protein_coding	Q9UDR5	-0.129306	0.531069	0.219168	0.324085	0	1	1	1
ENSG00000008323	PLEKHG6	protein_coding	Q3KR16	0.157121	NA	1.46842	NA	0	1	0	1
ENSG00000008324	SS18L2	protein_coding	Q9UHA2	0.251688	0.162218	0.194031	0.401364	0	0	0	0
ENSG00000008382	MPND	protein_coding	Q8N594	0.568252	0.0709514	0.152678	NA	0	0	0	0
ENSG00000008394	MGST1	protein_coding	P10620	-0.19369	0.153587	0.189137	0.214234	1	1	1	1
ENSG00000008405	CRY1	protein_coding	Q16526	-0.0378051	0.853935	0.153513	0.402438	0	0	1	0
ENSG00000008438	PGLYRP1	protein_coding	O75594	-0.223148	NA	0.759943	NA	1	1	0	1
ENSG00000008441	NFIX	protein_coding	Q14938	0.0818988	0.789747	0.166461	0.596644	0	0	0	0
ENSG00000008513	ST3GAL1	protein_coding	Q11201	0.322253	0.567558	0.710864	NA	1	1	0	1
ENSG00000008516	MMP25	protein_coding	Q9NPA2	-0.791734	0.630567	-0.71788	NA	1	1	0	1
ENSG00000008517	IL32	protein_coding	P24001	0.352593	0.749528	-0.264857	NA	1	1	0	1
ENSG00000008710	PKD1	protein_coding	P98161	0.281279	0.11568	0.537881	0.0044338	1	0	0	1
ENSG00000008735	MAPK8IP2	protein_coding	Q13387	0.29251	0.04887	0.0369587	0.872949	0	0	0	0
ENSG00000008838	MED24	protein_coding	O75448	0.310089	0.00483504	0.456809	0.000120173	0	0	0	0
ENSG00000008853	RHOBTB2	protein_coding	Q9BYZ6	0.0696012	0.892305	0.408838	NA	1	1	0	1
ENSG00000008869	HEATR5B	protein_coding	Q9P2D3	-0.131723	0.305363	0.340846	0.011496	1	0	0	1
ENSG00000008952	SEC62	protein_coding	Q99442	-0.219273	0.0659289	-0.104442	0.438545	1	1	0	1
ENSG00000008988	RPS20	protein_coding	P60866	0.690214	4.25398e-18	-0.206253	0.0492488	1	1	0	1
ENSG00000009307	CSDE1	protein_coding	O75534	-0.0763399	0.407265	-0.195679	0.0201107	1	0	0	1
ENSG00000009335	UBE3C	protein_coding	Q15386	-0.29789	0.00599959	0.325202	0.013549	0	1	0	1
ENSG00000009413	REV3L	protein_coding	O60673	-0.493239	0.000193229	0.426128	0.0183361	0	0	0	0
ENSG00000009694	TENM1	protein_coding	Q9UKZ4	-0.655717	0.0394004	0.746739	NA	1	0	0	1
ENSG00000009709	PAX7	protein_coding	P23759	0.0430889	0.978432	0.460724	NA	0	0	0	0
ENSG00000009724	MASP2	protein_coding	O00187	-0.181166	0.821587	0.745774	NA	1	1	0	1
ENSG00000009765	IYD	protein_coding	Q6PHW0	-2.50186	NA	-1.02551	NA	1	1	0	1
ENSG00000009780	FAM76A	protein_coding	Q8TAV0	-0.118114	0.604926	-0.113161	0.677306	0	0	0	0
ENSG00000009790	TRAF3IP3	protein_coding	Q9Y228	-0.590639	NA	0.900427	NA	1	1	0	1
ENSG00000009830	POMT2	protein_coding	Q9UKY4	0.333916	0.086107	0.426113	0.0429861	1	0	0	1
ENSG00000009844	VTA1	protein_coding	Q9NP79	-0.253956	0.0153968	-0.288999	0.0148883	1	1	0	1
ENSG00000009950	MLXIPL	protein_coding	Q9NP71	-0.399776	0.343197	-0.0408323	NA	0	1	0	1
ENSG00000009954	BAZ1B	protein_coding	Q9UIG0	-0.00131438	0.992099	-0.0836462	0.432583	0	0	0	0
ENSG00000010017	RANBP9	protein_coding	Q96S59	0.0655024	0.673391	-0.137316	0.325461	1	0	0	1
ENSG00000010030	ETV7	protein_coding	Q9Y603	0.148896	NA	1.12341	NA	0	0	0	0
ENSG00000010072	SPRTN	protein_coding	Q9H040	-0.365674	0.00274869	-0.309523	0.0212941	0	0	0	0
ENSG00000010165	METTL13	protein_coding	Q8N6R0	0.511523	5.25776e-05	0.163859	0.328362	0	0	0	0
ENSG00000010219	DYRK4	protein_coding	Q9NR20	-0.762088	0.00193399	-0.196816	NA	0	1	0	1
ENSG00000010244	ZNF207	protein_coding	O43670	-0.233992	0.110711	-0.0324114	0.895819	0	1	0	1
ENSG00000010256	UQCRC1	protein_coding	P31930	0.0451597	0.718841	-0.24297	0.0184459	0	0	1	0
ENSG00000010270	STARD3NL	protein_coding	O95772	0.121175	0.487209	0.139052	0.489795	1	1	0	1
ENSG00000010278	CD9	protein_coding	P21926	0.514544	8.97958e-06	-0.0861496	0.597417	1	1	0	1
ENSG00000010282	HHATL	protein_coding	Q9HCP6	-1.78543	NA	-0.42353	NA	1	0	0	1
ENSG00000010292	NCAPD2	protein_coding	Q15021	0.242623	0.00916409	0.172585	0.115704	1	0	0	1
ENSG00000010295	IFFO1	protein_coding	Q0D2I5	0.897602	2.94772e-11	0.349313	0.0271221	0	0	0	0
ENSG00000010310	GIPR	protein_coding	P48546	0.8938	0.217543	-0.0199264	NA	1	0	0	1
ENSG00000010318	PHF7	protein_coding	Q9BWX1	-0.295588	0.499739	-0.109992	NA	1	1	0	1
ENSG00000010319	SEMA3G	protein_coding	Q9NS98	0.660027	0.237488	0.342792	NA	1	1	0	1
ENSG00000010322	NISCH	protein_coding	Q9Y2I1	0.234308	0.0337285	0.417279	0.000502713	1	0	0	1
ENSG00000010327	STAB1	protein_coding	Q9NY15	0.135035	NA	-0.0643885	NA	1	1	0	1
ENSG00000010361	FUZ	protein_coding	Q9BT04	0.0480326	0.789673	0.16541	0.328557	0	0	0	0
ENSG00000010379	SLC6A13	protein_coding	Q9NSD5	0.651136	0.172288	0.873052	NA	1	0	0	1
ENSG00000010404	IDS	protein_coding	P22304	-0.775473	0.000567741	0.372443	NA	0	1	0	1
ENSG00000010438	PRSS3	protein_coding	P35030	-2.56339	NA	NA	NA	1	1	0	1
ENSG00000010539	ZNF200	protein_coding	P98182	0.314327	0.0291109	-0.469491	0.000292491	0	0	0	0
ENSG00000010610	CD4	protein_coding	P01730	-0.434507	0.770505	0.81776	NA	1	1	0	1
ENSG00000010626	LRRC23	protein_coding	Q53EV4	-0.58685	0.130646	-0.393459	NA	0	0	0	0
ENSG00000010671	BTK	protein_coding	Q06187	-0.501847	0.521553	0.240066	NA	1	1	0	1
ENSG00000010704	HFE	protein_coding	Q30201	0.21649	NA	0.000834221	NA	1	0	0	1
ENSG00000010803	SCMH1	protein_coding	Q96GD3	-0.331001	0.0725865	0.380881	0.0900715	0	0	0	0
ENSG00000010810	FYN	protein_coding	P06241	-0.15586	0.223282	-0.132099	0.370463	1	1	0	1
ENSG00000010818	HIVEP2	protein_coding	P31629	-0.542605	0.00772176	-0.177235	0.528204	0	0	0	0
ENSG00000010932	FMO1	protein_coding	Q01740	-2.4032	NA	-1.02551	NA	1	0	0	1
ENSG00000011007	TCEB3	protein_coding	#N/A	-0.293461	0.0443076	-0.300123	0.0710339	0	0	0	0
ENSG00000011009	LYPLA2	protein_coding	O95372	0.785153	0.00105644	0.146606	0.649423	0	0	0	0
ENSG00000011021	CLCN6	protein_coding	P51797	0.341213	0.0458479	0.287982	0.14541	1	1	0	1
ENSG00000011028	MRC2	protein_coding	Q9UBG0	0.474987	0.00876931	0.230505	0.305135	1	0	0	1
ENSG00000011052	NME1-NME2	protein_coding	#N/A	NA	NA	NA	NA	0	1	0	1
ENSG00000011083	SLC6A7	protein_coding	Q99884	NA	NA	NA	NA	1	0	0	1
ENSG00000011105	TSPAN9	protein_coding	O75954	0.190423	0.603384	0.141486	NA	1	1	0	1
ENSG00000011114	BTBD7	protein_coding	Q9P203	-1.86583	NA	0.898042	NA	0	0	0	0
ENSG00000011132	APBA3	protein_coding	O96018	0.350803	0.188977	0.294393	0.340468	1	1	0	1
ENSG00000011143	MKS1	protein_coding	Q9NXB0	0.0715251	0.75752	0.049042	0.867553	1	0	0	1
ENSG00000011198	ABHD5	protein_coding	Q8WTS1	-0.336243	0.0688783	-0.237177	0.315856	0	1	0	1
ENSG00000011201	ANOS1	protein_coding	P23352	0.737962	NA	-0.760217	NA	1	1	0	1
ENSG00000011243	AKAP8L	protein_coding	Q9ULX6	0.413895	0.000699188	-0.401089	0.00185317	0	0	0	0
ENSG00000011258	MBTD1	protein_coding	Q05BQ5	-0.471417	0.00456347	-0.0196682	0.955189	0	0	0	0
ENSG00000011260	UTP18	protein_coding	Q9Y5J1	-0.260602	0.0177797	0.17024	0.272305	0	0	0	0
ENSG00000011275	RNF216	protein_coding	Q9NWF9	-0.0409797	0.811759	-0.104179	0.505571	0	0	0	0
ENSG00000011295	TTC19	protein_coding	Q6DKK2	-0.146476	0.380128	0.0543553	0.81317	0	1	1	1
ENSG00000011304	PTBP1	protein_coding	P26599	0.0530432	0.65874	-0.166137	0.130872	1	0	0	1
ENSG00000011332	DPF1	protein_coding	Q92782	0.621215	0.00451865	-0.205799	0.423599	0	0	0	0
ENSG00000011347	SYT7	protein_coding	O43581	-0.221018	0.769439	0.112978	NA	1	0	0	1
ENSG00000011376	LARS2	protein_coding	Q15031	-0.58111	1.6295e-05	0.0702416	0.779461	0	0	1	0
ENSG00000011405	PIK3C2A	protein_coding	O00443	-0.857669	2.41431e-20	-0.0428322	0.807948	1	0	0	1
ENSG00000011422	PLAUR	protein_coding	Q03405	0.295568	0.316519	0.0243372	0.957801	1	1	0	1
ENSG00000011426	ANLN	protein_coding	Q9NQW6	-0.295602	0.00363032	-0.181841	0.157826	0	0	0	0
ENSG00000011451	WIZ	protein_coding	O95785	0.38764	0.0117539	0.0833292	0.702452	0	0	0	0
ENSG00000011454	RABGAP1	protein_coding	Q9Y3P9	-0.42861	0.000160843	0.00443761	0.985935	0	0	0	0
ENSG00000011465	DCN	protein_coding	P07585	2.42538	NA	0.0273077	NA	1	1	0	1
ENSG00000011478	QPCTL	protein_coding	Q9NXS2	0.379087	0.0225246	0.2764	0.17188	1	1	0	1
ENSG00000011485	PPP5C	protein_coding	P53041	0.332874	0.000983517	0.309855	0.0101298	1	1	0	1
ENSG00000011523	CEP68	protein_coding	Q76N32	0.139525	0.570314	0.0571781	0.859462	0	0	0	0
ENSG00000011566	MAP4K3	protein_coding	Q8IVH8	-0.628779	1.60217e-05	0.0163624	0.959533	0	0	0	0
ENSG00000011590	ZBTB32	protein_coding	Q9Y2Y4	-0.0111883	0.994496	0.608837	NA	0	0	0	0
ENSG00000011600	TYROBP	protein_coding	O43914	NA	NA	-1.02551	NA	1	0	0	1
ENSG00000011638	TMEM159	protein_coding	Q96B96	-0.110292	0.824209	0.0164003	NA	1	1	0	1
ENSG00000011677	GABRA3	protein_coding	P34903	-0.983282	NA	-2.47163	NA	1	0	0	1
ENSG00000012048	BRCA1	protein_coding	P38398	-0.52572	2.53078e-08	0.135193	0.352094	1	0	0	1
ENSG00000012061	ERCC1	protein_coding	P07992	0.84209	3.10283e-10	-0.0449158	0.853255	0	0	0	0
ENSG00000012124	CD22	protein_coding	P20273	-1.80124	NA	NA	NA	1	1	0	1
ENSG00000012171	SEMA3B	protein_coding	Q13214	0.636117	0.0786091	0.230993	NA	1	1	0	1
ENSG00000012174	MBTPS2	protein_coding	O43462	0.0445245	0.77612	0.353338	0.00525146	1	0	0	1
ENSG00000012211	PRICKLE3	protein_coding	O43900	-0.0575687	0.900921	0.0910254	NA	1	1	0	1
ENSG00000012223	LTF	protein_coding	P02788	NA	NA	-1.02551	NA	1	1	0	1
ENSG00000012232	EXTL3	protein_coding	O43909	0.13067	0.579747	0.387181	0.0580516	1	0	0	1
ENSG00000012504	NR1H4	protein_coding	Q96RI1	-1.8992	NA	-1.02551	NA	0	0	0	0
ENSG00000012660	ELOVL5	protein_coding	Q9NYP7	0.298874	0.00221817	0.124651	0.330682	1	1	0	1
ENSG00000012779	ALOX5	protein_coding	P09917	NA	NA	NA	NA	1	0	0	1
ENSG00000012817	KDM5D	protein_coding	Q9BY66	-1.10668	0.10384	-0.26116	NA	0	0	0	0
ENSG00000012822	CALCOCO1	protein_coding	Q9P1Z2	1.13558	3.55981e-16	-1.1971e-05	0.999933	0	0	0	0
ENSG00000012963	UBR7	protein_coding	Q8N806	-1.2727	NA	-1.09613	NA	0	0	0	0
ENSG00000012983	MAP4K5	protein_coding	Q9Y4K4	-0.662896	3.54414e-07	-0.0172026	0.954536	0	1	0	1
ENSG00000013016	EHD3	protein_coding	Q9NZN3	0.402271	0.418096	0.326438	NA	1	1	0	1
ENSG00000013275	PSMC4	protein_coding	P43686	0.619806	0.481949	0.371812	NA	1	0	0	1
ENSG00000013288	MAN2B2	protein_coding	Q9Y2E5	0.927709	4.33541e-06	0.485947	0.040588	0	1	0	1
ENSG00000013293	SLC7A14	protein_coding	Q8TBB6	NA	NA	NA	NA	1	0	0	1
ENSG00000013297	CLDN11	protein_coding	O75508	-2.43658	NA	NA	NA	1	0	0	1
ENSG00000013306	SLC25A39	protein_coding	Q9BZJ4	0.383843	0.000122475	0.219751	0.05314	1	0	1	0
ENSG00000013364	MVP	protein_coding	Q14764	-0.0933326	0.886444	0.010032	NA	1	0	0	1
ENSG00000013374	NUB1	protein_coding	Q9Y5A7	-0.352056	0.000205769	-0.192485	0.101669	0	0	0	0
ENSG00000013375	PGM3	protein_coding	O95394	-0.445142	7.72426e-07	-0.299778	0.00664895	0	0	0	0
ENSG00000013392	RWDD2A	protein_coding	#N/A	-0.201527	0.401848	-0.265365	0.634027	0	0	0	0
ENSG00000013441	CLK1	protein_coding	P49759	-0.640244	1.2962e-10	-0.46546	3.37001e-05	0	0	0	0
ENSG00000013503	POLR3B	protein_coding	Q9NW08	-0.365045	0.00480711	0.0369678	0.87659	0	0	0	0
ENSG00000013523	ANGEL1	protein_coding	Q9UNK9	-0.18643	0.233106	0.151267	0.397788	1	1	0	1
ENSG00000013561	RNF14	protein_coding	Q9UBS8	-0.191812	0.243119	-0.00154013	0.996314	0	0	0	0
ENSG00000013563	DNASE1L1	protein_coding	P49184	-0.0840359	0.842004	0.672543	NA	1	1	0	1
ENSG00000013573	DDX11	protein_coding	Q96FC9	1.31368	1.53921e-25	0.498723	0.00014548	0	0	0	0
ENSG00000013583	HEBP1	protein_coding	Q9NRV9	0.121126	0.408657	-0.168797	0.233722	1	1	1	1
ENSG00000013588	GPRC5A	protein_coding	Q8NFJ5	-0.0523966	0.922693	-0.0759904	NA	1	1	0	1
ENSG00000013619	MAMLD1	protein_coding	Q13495	0.0577853	0.93866	0.208542	NA	1	0	0	1
ENSG00000013725	CD6	protein_coding	P30203	-0.983282	NA	-1.02551	NA	1	1	0	1
ENSG00000013810	TACC3	protein_coding	Q9Y6A5	0.255283	0.00909215	-0.168314	0.161375	0	1	0	1
ENSG00000014123	UFL1	protein_coding	O94874	0.045015	0.777518	0.238998	0.0650949	1	1	0	1
ENSG00000014138	POLA2	protein_coding	Q14181	-0.407037	6.11915e-05	0.00874087	0.967554	0	0	0	0
ENSG00000014164	ZC3H3	protein_coding	Q8IXZ2	0.191199	0.689929	0.1052	NA	0	1	0	1
ENSG00000014216	CAPN1	protein_coding	P07384	0.185462	0.206783	-0.0638128	0.760175	1	0	0	1
ENSG00000014257	ACPP	protein_coding	P15309	-2.78217	NA	-2.29267	NA	1	1	0	1
ENSG00000014641	MDH1	protein_coding	P40925	0.990697	7.5298e-25	-0.214091	0.137882	1	0	1	0
ENSG00000014824	SLC30A9	protein_coding	Q6PML9	-0.570328	4.23874e-06	0.0108703	0.969109	1	0	1	0
ENSG00000014914	MTMR11	protein_coding	A4FU01	-0.0398672	0.953445	0.815949	NA	0	0	0	0
ENSG00000014919	COX15	protein_coding	Q7KZN9	0.00373841	0.983737	0.0231424	0.912607	1	0	1	0
ENSG00000015133	CCDC88C	protein_coding	Q9P219	0.0769747	0.760898	0.00309993	0.994171	0	0	0	0
ENSG00000015153	YAF2	protein_coding	Q8IY57	-0.374625	0.0808109	-0.33369	0.188081	0	0	0	0
ENSG00000015171	ZMYND11	protein_coding	Q15326	0.0552702	0.856016	0.0311247	0.931318	0	0	0	0
ENSG00000015285	WAS	protein_coding	P42768	0.0432778	0.956119	-0.215209	NA	0	0	0	0
ENSG00000015413	DPEP1	protein_coding	P16444	1.14736	0.414822	0.475266	NA	1	1	0	1
ENSG00000015475	BID	protein_coding	P55957	0.270599	0.219457	0.0294806	0.934981	1	0	1	0
ENSG00000015479	MATR3.2	protein_coding	#N/A	-1.10344	0.0432636	-0.38682	NA	0	1	0	1
ENSG00000015520	NPC1L1	protein_coding	Q9UHC9	1.01225	0.0529467	0.701588	NA	1	0	0	1
ENSG00000015532	XYLT2	protein_coding	Q9H1B5	0.110302	0.662957	0.215505	0.40815	1	1	0	1
ENSG00000015568	RGPD5	protein_coding	Q99666	0.433003	0.445756	-0.208367	NA	0	1	0	1
ENSG00000015592	STMN4	protein_coding	Q9H169	0.75079	NA	1.28073	NA	1	1	0	1
ENSG00000015676	NUDCD3	protein_coding	Q8IVD9	0.297029	0.0191464	0.16057	0.299073	0	1	0	1
ENSG00000016082	ISL1	protein_coding	P61371	0.286139	0.201421	-0.115841	0.68507	0	0	0	0
ENSG00000016391	CHDH	protein_coding	Q8NE62	0.318181	0.226206	0.547335	0.0352893	0	0	1	0
ENSG00000016402	IL20RA	protein_coding	Q9UHF4	NA	NA	NA	NA	1	1	0	1
ENSG00000016490	CLCA1	protein_coding	A8K7I4	NA	NA	NA	NA	1	1	0	1
ENSG00000016602	CLCA4	protein_coding	Q14CN2	NA	NA	NA	NA	1	0	0	1
ENSG00000016864	GLT8D1	protein_coding	Q68CQ7	0.205455	0.226206	0.379232	0.0372643	1	0	0	1
ENSG00000017260	ATP2C1	protein_coding	P98194	-0.0464672	0.808538	0.150702	0.397367	1	1	0	1
ENSG00000017427	IGF1	protein_coding	P05019	NA	NA	NA	NA	1	1	0	1
ENSG00000017483	SLC38A5	protein_coding	Q8WUX1	-0.244788	NA	0.322898	NA	1	1	0	1
ENSG00000017797	RALBP1	protein_coding	Q15311	-0.145586	0.534474	-0.204394	0.395474	1	1	0	1
ENSG00000018189	RUFY3	protein_coding	Q7L099	-0.25052	0.123457	0.263737	0.217349	1	0	0	1
ENSG00000018236	CNTN1	protein_coding	Q12860	-0.292146	0.312689	0.126512	NA	1	1	0	1
ENSG00000018280	SLC11A1	protein_coding	P49279	-0.0666672	NA	-0.815299	NA	1	0	0	1
ENSG00000018408	WWTR1	protein_coding	Q9GZV5	0.659861	6.47829e-05	0.0895008	0.717377	0	0	0	0
ENSG00000018510	AGPS	protein_coding	O00116	-0.51804	1.46223e-06	-0.152679	0.317634	1	1	0	1
ENSG00000018607	ZNF806	unprocessed_pseudogene	P0C7X5	0.876048	NA	1.79817	NA	0	0	0	0
ENSG00000018610	CXorf56	protein_coding	Q9H5V9	0.0809385	0.686106	-0.212441	0.209788	0	0	0	0
ENSG00000018625	ATP1A2	protein_coding	P50993	0.940271	NA	-1.09264	NA	1	0	0	1
ENSG00000018699	TTC27	protein_coding	Q6P3X3	-0.457283	0.000495636	0.0511708	0.83824	0	0	0	0
ENSG00000018869	ZNF582	protein_coding	Q96NG8	1.04839	0.000199038	-0.0139031	0.978528	0	0	0	0
ENSG00000019102	VSIG2	protein_coding	Q96IQ7	0.352211	NA	-0.344124	NA	1	0	0	1
ENSG00000019144	PHLDB1	protein_coding	Q86UU1	0.3473	0.0566457	0.134641	0.663633	0	0	0	0
ENSG00000019169	MARCO	protein_coding	Q9UEW3	3.76922	NA	3.73074	NA	1	1	0	1
ENSG00000019186	CYP24A1	protein_coding	Q07973	-2.80052	NA	-1.02551	NA	1	1	1	1
ENSG00000019485	PRDM11	protein_coding	Q9NQV5	-0.135503	0.842004	0.567497	NA	0	0	0	0
ENSG00000019505	SYT13	protein_coding	Q7L8C5	-0.619429	NA	-0.658671	NA	1	1	0	1
ENSG00000019549	SNAI2	protein_coding	O43623	-0.118225	0.743787	0.422045	NA	0	0	0	0
ENSG00000019582	CD74	protein_coding	P04233	0.687891	NA	0.350693	NA	1	1	0	1
ENSG00000019991	HGF	protein_coding	P14210	-0.153974	NA	0.837757	NA	1	1	0	1
ENSG00000019995	ZRANB1	protein_coding	Q9UGI0	0.120065	0.468971	0.139738	0.433794	0	0	0	0
ENSG00000020129	NCDN	protein_coding	Q9UBB6	0.167737	0.332823	0.068897	0.779304	1	0	0	1
ENSG00000020181	ADGRA2	protein_coding	Q96PE1	0.60372	0.094287	0.434433	NA	1	0	0	1
ENSG00000020219	CCT8L1P	processed_pseudogene	A6NM43	-0.357747	NA	3.72399	NA	0	0	0	0
ENSG00000020256	ZFP64	protein_coding	Q9NPA5	-0.22031	0.24065	0.0108416	0.970573	0	0	0	0
ENSG00000020426	MNAT1	protein_coding	P51948	-0.222646	0.140824	-0.285523	0.0634941	0	0	0	0
ENSG00000020577	SAMD4A	protein_coding	Q9UPU9	0.482768	0.124741	0.37494	NA	0	1	0	1
ENSG00000020633	RUNX3	protein_coding	Q13761	0.470661	0.421913	1.00164	NA	0	0	0	0
ENSG00000020922	MRE11	protein_coding	P49959	-0.660005	1.68242e-09	-0.137007	0.429724	0	0	0	0
ENSG00000021300	PLEKHB1	protein_coding	Q9UF11	0.384893	0.0269318	-0.419641	0.0203122	1	0	0	1
ENSG00000021355	SERPINB1	protein_coding	P30740	0.133969	0.461711	0.125061	0.545104	1	0	0	1
ENSG00000021461	CYP3A43	protein_coding	Q9HB55	-2.4032	NA	NA	NA	1	0	0	1
ENSG00000021488	SLC7A9	protein_coding	P82251	-1.22728	0.424618	-1.49546	NA	1	0	0	1
ENSG00000021574	SPAST	protein_coding	Q9UBP0	-0.127289	0.530832	0.0023964	0.995014	1	0	0	1
ENSG00000021645	NRXN3	protein_coding	Q9Y4C0	0.193673	0.642296	0.613855	NA	1	0	0	1
ENSG00000021762	OSBPL5	protein_coding	Q9H0X9	0.692205	0.039873	0.257204	NA	1	1	0	1
ENSG00000021776	AQR	protein_coding	O60306	-0.412393	7.62142e-06	0.162476	0.189713	1	0	0	1
ENSG00000021826	CPS1	protein_coding	P31327	-0.807669	1.2095e-06	-0.144353	0.597417	0	0	1	0
ENSG00000021852	C8B	protein_coding	P07358	NA	NA	NA	NA	1	1	0	1
ENSG00000022267	FHL1	protein_coding	Q13642	0.442353	1.19174e-07	-0.208214	0.0377407	1	1	0	1
ENSG00000022277	RTFDC1	protein_coding	Q9BY42	-0.170432	0.16728	-0.302529	0.00713411	0	0	0	0
ENSG00000022355	GABRA1	protein_coding	P14867	-0.983282	NA	NA	NA	1	1	0	1
ENSG00000022556	NLRP2	protein_coding	Q9NX02	NA	NA	NA	NA	1	1	0	1
ENSG00000022567	SLC45A4	protein_coding	Q5BKX6	0.414987	0.0923129	0.413862	0.135535	1	1	0	1
ENSG00000022840	RNF10	protein_coding	Q8N5U6	-0.173405	0.219633	0.0781771	0.684657	0	0	0	0
ENSG00000022976	ZNF839	protein_coding	A8K0R7	-0.340912	0.134561	0.199962	0.521334	0	1	0	1
ENSG00000023041	ZDHHC6	protein_coding	Q9H6R6	0.288232	0.149826	0.317463	0.14297	1	0	0	1
ENSG00000023171	GRAMD1B	protein_coding	Q3KR37	-0.0740916	0.885041	-0.273585	NA	1	0	0	1
ENSG00000023191	RNH1	protein_coding	P13489	2.13063	0.0902787	-0.069439	NA	0	0	0	0
ENSG00000023228	NDUFS1	protein_coding	P28331	0.181968	0.837643	0.80948	NA	0	0	1	0
ENSG00000023287	RB1CC1	protein_coding	Q8TDY2	-0.409597	0.000860341	0.0229835	0.929967	1	0	0	1
ENSG00000023318	ERP44	protein_coding	Q9BS26	0.990523	1.87927e-16	0.437995	0.00343584	1	1	0	1
ENSG00000023330	ALAS1	protein_coding	P13196	0.245794	0.03774	-0.367494	0.0017741	0	0	1	0
ENSG00000023445	BIRC3	protein_coding	Q13489	-0.348941	NA	0.0273077	NA	0	0	0	0
ENSG00000023516	AKAP11	protein_coding	Q9UKA4	-0.623938	1.79502e-09	-0.0112681	0.961905	1	1	0	1
ENSG00000023572	GLRX2	protein_coding	Q9NS18	-0.149889	0.478739	-0.391033	0.0280987	0	0	1	0
ENSG00000023608	SNAPC1	protein_coding	Q16533	-0.186487	0.408913	-0.0399723	0.917094	0	0	0	0
ENSG00000023697	DERA	protein_coding	Q9Y315	0.251758	0.113133	0.061378	0.779294	1	0	0	1
ENSG00000023734	STRAP	protein_coding	Q9Y3F4	0.0719647	0.555169	-0.0713246	0.57868	0	0	0	0
ENSG00000023839	ABCC2	protein_coding	Q92887	-1.16252	0.0793338	-0.219624	NA	1	0	0	1
ENSG00000023892	DEF6	protein_coding	Q9H4E7	0.439676	0.514109	0.0698107	NA	1	0	0	1
ENSG00000023902	PLEKHO1	protein_coding	Q53GL0	0.206774	0.413914	-0.00538296	0.990315	0	0	0	0
ENSG00000023909	GCLM	protein_coding	P48507	-0.887176	5.00456e-13	-0.383107	0.0147231	0	1	0	1
ENSG00000024048	UBR2	protein_coding	Q8IWV8	-0.181847	0.13906	0.102086	0.551418	0	1	0	1
ENSG00000024422	EHD2	protein_coding	Q9NZN4	0.437521	0.369884	-0.130007	NA	1	1	0	1
ENSG00000024526	DEPDC1	protein_coding	Q5TB30	-0.354206	0.00583893	0.0940827	0.646233	0	0	0	0
ENSG00000024862	CCDC28A	protein_coding	Q8IWP9	0.273135	0.156356	-0.199972	0.386324	0	0	0	0
ENSG00000025039	RRAGD	protein_coding	Q9NQL2	0.0878853	0.824774	0.189728	NA	1	0	0	1
ENSG00000025156	HSF2	protein_coding	Q03933	-0.234174	0.0956184	-0.250536	0.091687	0	0	0	0
ENSG00000025293	PHF20	protein_coding	Q9BVI0	-0.194211	0.23175	-0.105405	0.618091	0	0	0	0
ENSG00000025423	HSD17B6	protein_coding	O14756	0.5511	0.0121759	0.24271	0.382648	1	1	0	1
ENSG00000025434	NR1H3	protein_coding	Q13133	-0.0395276	0.928168	0.0953201	NA	0	0	0	0
ENSG00000025708	TYMP	protein_coding	P19971	0.440503	0.641404	0.281468	NA	0	1	0	1
ENSG00000025770	NCAPH2	protein_coding	Q6IBW4	0.496829	4.72571e-05	0.237117	0.112581	1	0	0	1
ENSG00000025772	TOMM34	protein_coding	Q15785	0.0652225	0.570337	-0.447303	1.65936e-06	1	0	1	0
ENSG00000025796	SEC63	protein_coding	Q9UGP8	-0.397837	2.5092e-05	0.0385415	0.827587	1	1	0	1
ENSG00000025800	KPNA6	protein_coding	O60684	-0.113926	0.458111	-0.0339741	0.872856	1	0	0	1
ENSG00000026025	VIM	protein_coding	P08670	-0.607352	1.47061e-11	-0.220347	0.0466765	1	0	0	1
ENSG00000026036	RTEL1-TNFRSF6B	protein_coding	F6WH68	1.01643	0.230228	0.689392	NA	0	0	0	0
ENSG00000026103	FAS	protein_coding	P25445	-0.476053	0.243879	-0.121316	NA	1	1	0	1
ENSG00000026297	RNASET2	protein_coding	O00584	0.356298	0.28347	-0.26089	0.46807	1	1	0	1
ENSG00000026508	CD44	protein_coding	P16070	0.858995	0.602261	0.145506	NA	1	1	0	1
ENSG00000026559	KCNG1	protein_coding	Q9UIX4	0.559547	0.0868421	0.149121	NA	1	1	0	1
ENSG00000026652	AGPAT4	protein_coding	Q9NRZ5	0.666639	1.02708e-07	0.297683	0.0928743	1	1	0	1
ENSG00000026751	SLAMF7	protein_coding	Q9NQ25	0.940271	NA	0.898042	NA	1	1	0	1
ENSG00000026950	BTN3A1	protein_coding	O00481	-0.169594	0.744843	0.415465	NA	1	1	0	1
ENSG00000027001	MIPEP	protein_coding	Q99797	-0.375772	0.0376881	-0.248249	0.209302	0	0	1	0
ENSG00000027075	PRKCH	protein_coding	P24723	0.139351	0.741794	-0.122481	NA	1	1	0	1
ENSG00000027644	INSRR	protein_coding	P14616	0.938519	NA	1.41723	NA	1	0	0	1
ENSG00000027697	IFNGR1	protein_coding	P15260	0.225501	0.0515821	0.179264	0.181956	1	1	0	1
ENSG00000027847	B4GALT7	protein_coding	Q9UBV7	0.877157	2.0765e-07	0.453626	0.0227193	1	0	0	1
ENSG00000027869	SH2D2A	protein_coding	Q9NP31	0.622901	0.200551	0.0870614	NA	0	0	0	0
ENSG00000028116	VRK2	protein_coding	Q86Y07	-0.56274	0.000547621	-0.177566	0.449805	1	1	0	1
ENSG00000028137	TNFRSF1B	protein_coding	P20333	0.0879956	NA	1.42045	NA	1	1	0	1
ENSG00000028203	VEZT	protein_coding	Q9HBM0	-0.612358	1.01396e-05	0.0332821	0.914892	1	0	0	1
ENSG00000028277	POU2F2	protein_coding	P09086	-0.133857	0.861816	0.0437043	NA	0	1	0	1
ENSG00000028310	BRD9	protein_coding	Q9H8M2	0.0509289	0.83552	0.214969	0.299073	0	0	0	0
ENSG00000028528	SNX1	protein_coding	Q13596	-0.308574	0.0290777	-0.141192	0.460038	1	1	0	1
ENSG00000028839	TBPL1	protein_coding	P62380	-0.0639024	0.808015	0.00236342	0.995596	0	0	0	0
ENSG00000029153	ARNTL2	protein_coding	Q8WYA1	-0.846725	0.0201318	0.0978842	NA	0	0	0	0
ENSG00000029363	BCLAF1	protein_coding	Q9NYF8	-0.161951	0.0921125	-0.371094	5.87884e-05	0	0	0	0
ENSG00000029364	SLC39A9	protein_coding	Q9NUM3	0.871538	1.02956e-16	0.396374	0.00158833	1	1	0	1
ENSG00000029534	ANK1	protein_coding	P16157	0.299348	0.498038	0.205279	NA	1	1	0	1
ENSG00000029559	IBSP	protein_coding	P21815	NA	NA	NA	NA	1	1	0	1
ENSG00000029639	TFB1M	protein_coding	Q8WVM0	-0.517899	0.000378327	-0.135209	0.549201	0	0	1	0
ENSG00000029725	RABEP1	protein_coding	Q15276	-0.273741	0.0339945	-0.0564	0.7882	1	1	0	1
ENSG00000029993	HMGB3	protein_coding	O15347	0.389336	0.00166189	-0.225282	0.110938	0	0	0	0
ENSG00000030066	NUP160	protein_coding	Q12769	-0.769028	7.8865e-20	0.0220542	0.895819	0	0	0	0
ENSG00000030110	BAK1	protein_coding	Q16611	0.822413	0.000102583	0.463278	0.0710626	1	0	1	0
ENSG00000030304	MUSK	protein_coding	O15146	2.56676	NA	2.52906	NA	1	0	0	1
ENSG00000030419	IKZF2	protein_coding	Q9UKS7	0.150158	0.797743	-0.199338	NA	0	0	0	0
ENSG00000030582	GRN	protein_coding	P28799	1.43306	4.9294e-71	0.261726	0.00853669	1	1	0	1
ENSG00000031003	FAM13B	protein_coding	Q9NYF5	-0.655929	4.77172e-07	-0.21703	0.24931	0	0	0	0
ENSG00000031081	ARHGAP31	protein_coding	Q2M1Z3	-0.214836	0.68303	0.186136	NA	0	0	0	0
ENSG00000031691	CENPQ	protein_coding	Q7L2Z9	-0.304908	0.0664654	-0.328856	0.0515574	0	0	0	0
ENSG00000031698	SARS	protein_coding	P49591	0.209328	0.00752615	-0.210014	0.0226258	0	0	0	0
ENSG00000031823	RANBP3	protein_coding	Q9H6Z4	0.194466	0.131827	0.104769	0.523709	0	0	0	0
ENSG00000032219	ARID4A	protein_coding	P29374	-0.561607	6.64059e-06	-0.211407	0.226199	1	1	0	1
ENSG00000032389	TSSC1	protein_coding	#N/A	0.886414	1.55732e-13	0.110509	0.5308	0	0	0	0
ENSG00000032444	PNPLA6	protein_coding	Q8IY17	0.0464378	0.884413	0.32482	0.263463	1	0	0	1
ENSG00000032742	IFT88	protein_coding	Q13099	-0.764046	0.0043044	-0.206717	NA	0	0	0	0
ENSG00000033011	ALG1	protein_coding	Q9BT22	0.680317	1.84937e-06	0.0494429	0.836344	1	1	0	1
ENSG00000033030	ZCCHC8	protein_coding	Q6NZY4	-0.430823	5.94343e-05	-0.139049	0.280179	0	0	0	0
ENSG00000033050	ABCF2	protein_coding	Q9UG63	0.0551909	0.669335	0.0878038	0.536121	1	0	1	0
ENSG00000033100	CHPF2	protein_coding	Q9P2E5	-0.0817407	0.625765	0.315155	0.0320293	1	1	0	1
ENSG00000033122	LRRC7	protein_coding	Q96NW7	-1.4136	NA	0.898042	NA	1	0	0	1
ENSG00000033170	FUT8	protein_coding	Q9BYC5	-0.363891	0.122292	-0.0840066	0.819854	1	1	0	1
ENSG00000033178	UBA6	protein_coding	A0AVT1	-0.514708	1.97563e-07	-0.119984	0.408871	0	0	0	0
ENSG00000033327	GAB2	protein_coding	Q9UQC2	-0.0484029	0.905029	-0.171619	0.644614	1	1	0	1
ENSG00000033627	ATP6V0A1	protein_coding	Q93050	0.0548306	0.655065	0.0105352	0.956656	1	1	0	1
ENSG00000033800	PIAS1	protein_coding	O75925	-0.231935	0.107683	-0.31461	0.039005	0	0	0	0
ENSG00000033867	SLC4A7	protein_coding	Q9Y6M7	-0.262233	0.0424153	0.0453256	0.841112	1	1	0	1
ENSG00000034053	APBA2	protein_coding	Q99767	1.96631	NA	0.164215	NA	1	0	0	1
ENSG00000034152	MAP2K3	protein_coding	P46734	0.204205	0.21873	-0.100312	0.639543	1	0	0	1
ENSG00000034239	EFCAB1	protein_coding	Q9HAE3	1.83944	NA	1.79817	NA	0	1	0	1
ENSG00000034510	TMSB10	protein_coding	P63313	-0.0521681	0.760031	-0.29806	0.0302673	0	0	0	0
ENSG00000034533	ASTE1	protein_coding	Q2TB18	-0.354667	0.109446	0.0449783	0.910079	0	1	0	1
ENSG00000034677	RNF19A	protein_coding	Q9NV58	-0.094791	0.725601	0.202117	0.455352	1	0	0	1
ENSG00000034693	PEX3	protein_coding	P56589	-0.671074	7.7393e-06	-0.0722985	0.777575	1	1	0	1
ENSG00000034713	GABARAPL2	protein_coding	P60520	0.257997	0.00924009	-0.161391	0.18765	1	0	0	1
ENSG00000034971	MYOC	protein_coding	Q99972	NA	NA	NA	NA	1	1	0	1
ENSG00000035115	SH3YL1	protein_coding	Q96HL8	-0.277546	0.502007	0.260617	NA	0	0	0	0
ENSG00000035141	FAM136A	protein_coding	Q96C01	-0.318879	0.0635218	-0.130639	0.588498	0	0	1	0
ENSG00000035403	VCL	protein_coding	P18206	-0.131462	0.23011	-0.262738	0.00833898	1	0	0	1
ENSG00000035499	DEPDC1B	protein_coding	Q8WUY9	0.0617634	0.786365	-0.225304	0.229893	0	1	0	1
ENSG00000035664	DAPK2	protein_coding	Q9UIK4	0.16573	0.906793	0.706012	NA	1	1	0	1
ENSG00000035681	NSMAF	protein_coding	Q92636	-0.597211	0.00838974	0.314718	0.376534	0	0	0	0
ENSG00000035687	ADSS	protein_coding	P30520	-0.596845	3.02217e-10	-0.151807	0.263451	1	1	0	1
ENSG00000035720	STAP1	protein_coding	Q9ULZ2	-1.4136	NA	-1.93762	NA	0	1	0	1
ENSG00000035862	TIMP2	protein_coding	P16035	2.10896	4.10349e-18	-0.307348	0.227475	1	1	0	1
ENSG00000035928	RFC1	protein_coding	P35251	-0.445078	7.62685e-06	-0.0899081	0.568728	0	0	0	0
ENSG00000036054	TBC1D23	protein_coding	Q9NUY8	-0.607367	5.2726e-06	-0.00985431	0.97554	1	1	0	1
ENSG00000036257	CUL3	protein_coding	Q13618	-0.201682	0.141322	-0.0300927	0.885171	1	0	0	1
ENSG00000036448	MYOM2	protein_coding	P54296	-0.438143	NA	-0.131663	NA	0	0	0	0
ENSG00000036473	OTC	protein_coding	P00480	NA	NA	NA	NA	0	0	1	0
ENSG00000036530	CYP46A1	protein_coding	Q9Y6A2	0.0297383	NA	-0.00325467	NA	1	1	0	1
ENSG00000036549	ZZZ3	protein_coding	Q8IYH5	-0.424557	0.00038454	0.159826	0.38714	0	0	0	0
ENSG00000036565	SLC18A1	protein_coding	P54219	NA	NA	NA	NA	1	0	0	1
ENSG00000036672	USP2	protein_coding	O75604	0.285879	0.131683	0.00544443	0.988633	1	1	0	1
ENSG00000036828	CASR.1	protein_coding	#N/A	-1.94744	NA	NA	NA	0	0	0	0
ENSG00000037042	TUBG2	protein_coding	Q9NRH3	-0.292483	0.556279	0.268822	NA	0	0	0	0
ENSG00000037241	RPL26L1	protein_coding	Q9UNX3	-0.327441	0.135132	-0.202145	0.46803	0	1	0	1
ENSG00000037280	FLT4	protein_coding	P35916	0.952606	1.81544e-12	0.19961	0.254797	1	1	0	1
ENSG00000037474	NSUN2	protein_coding	Q08J23	0.369936	1.01881e-05	0.0613231	0.639543	0	0	0	0
ENSG00000037637	FBXO42	protein_coding	Q6P3S6	0.298627	0.0537516	0.28738	0.113658	0	0	0	0
ENSG00000037749	MFAP3	protein_coding	P55082	0.383509	0.00695995	0.149077	0.433462	1	1	0	1
ENSG00000037757	MRI1	protein_coding	Q9BV20	0.549577	4.8017e-05	0.169901	0.337656	0	0	0	0
ENSG00000037897	METTL1	protein_coding	Q9UBP6	0.229251	0.227209	0.123529	0.537774	0	0	0	0
ENSG00000037965	HOXC8	protein_coding	P31273	-0.308556	0.608707	-0.0637051	NA	0	0	0	0
ENSG00000038002	AGA	protein_coding	P20933	0.47669	2.49808e-05	0.0504079	0.775391	1	1	0	1
ENSG00000038210	PI4K2B	protein_coding	Q8TCG2	0.393976	0.452802	0.630582	NA	1	0	0	1
ENSG00000038219	BOD1L1	protein_coding	Q8NFC6	-0.427556	4.39816e-05	-0.094655	0.535425	0	0	0	0
ENSG00000038274	MAT2B	protein_coding	Q9NZL9	-0.268333	0.0500458	-0.206563	0.206782	0	0	0	0
ENSG00000038295	TLL1	protein_coding	O43897	-0.00895019	0.98992	0.142882	NA	1	1	0	1
ENSG00000038358	EDC4	protein_coding	Q6P2E9	-0.0860949	0.603127	0.0745077	0.696473	1	0	0	1
ENSG00000038382	TRIO	protein_coding	O75962	-0.283662	0.0313262	0.257391	0.109478	0	1	0	1
ENSG00000038427	VCAN	protein_coding	P13611	0.182536	0.141909	0.415295	0.000244383	1	1	0	1
ENSG00000038532	CLEC16A	protein_coding	Q2KHT3	0.114399	0.532641	-0.00363465	0.990107	1	1	0	1
ENSG00000038945	MSR1	protein_coding	P21757	NA	NA	NA	NA	1	0	0	1
ENSG00000039068	CDH1	protein_coding	P12830	0.327058	0.442838	0.0376272	NA	1	1	0	1
ENSG00000039123	SKIV2L2	protein_coding	#N/A	-0.691554	3.23327e-12	-0.150715	0.274467	0	0	0	0
ENSG00000039139	DNAH5	protein_coding	Q8TE73	0.563579	NA	0.364142	NA	0	0	0	0
ENSG00000039319	ZFYVE16	protein_coding	Q7Z3T8	-0.750182	2.84058e-10	-0.0796863	0.681697	0	1	0	1
ENSG00000039523	FAM65A	protein_coding	#N/A	1.5574	0.226286	0.172307	NA	0	1	0	1
ENSG00000039537	C6	protein_coding	P13671	NA	NA	NA	NA	1	1	0	1
ENSG00000039560	RAI14	protein_coding	Q9P0K7	-0.57769	1.62127e-06	-0.142847	0.439664	0	0	0	0
ENSG00000039600	SOX30	protein_coding	O94993	-0.457744	0.788307	-0.194185	NA	0	0	0	0
ENSG00000039650	PNKP	protein_coding	Q96T60	0.290099	0.0972572	0.176044	0.406233	1	0	0	1
ENSG00000039987	BEST2	protein_coding	Q8NFU1	0.55037	0.650308	1.01825	NA	1	0	0	1
ENSG00000040199	PHLPP2	protein_coding	Q6ZVD8	-0.269764	0.155079	0.0167021	0.961905	0	1	0	1
ENSG00000040275	SPDL1	protein_coding	Q96EA4	-0.44218	8.02304e-07	-0.200064	0.0989662	0	0	0	0
ENSG00000040341	STAU2	protein_coding	Q9NUL3	-0.42302	0.00708489	-0.353078	0.0583698	1	0	0	1
ENSG00000040487	PQLC2	protein_coding	Q6ZP29	0.65299	4.60862e-05	0.21473	0.33576	1	1	0	1
ENSG00000040531	CTNS	protein_coding	O60931	0.356101	0.0502041	0.188657	0.393081	1	1	0	1
ENSG00000040608	RTN4R	protein_coding	Q9BZR6	0.238432	0.739839	0.0664925	NA	1	1	0	1
ENSG00000040633	PHF23	protein_coding	Q9BUL5	0.291245	0.0167471	0.138995	0.386607	0	0	0	0
ENSG00000040731	CDH10	protein_coding	Q9Y6N8	-0.346146	0.795514	0.117216	NA	1	0	0	1
ENSG00000040933	INPP4A	protein_coding	Q96PE3	0.137043	0.448236	0.31229	0.0785925	0	0	0	0
ENSG00000041353	RAB27B	protein_coding	O00194	-3.19213	NA	-1.02551	NA	1	1	0	1
ENSG00000041357	PSMA4	protein_coding	P25789	0.759077	1.80628e-13	-0.381098	0.0100808	0	1	0	1
ENSG00000041515	MYO16	protein_coding	Q9Y6X6	-0.983282	NA	NA	NA	1	1	0	1
ENSG00000041802	LSG1	protein_coding	Q9H089	0.0169643	0.931858	-0.188464	0.20264	1	0	0	1
ENSG00000041880	PARP3	protein_coding	Q9Y6F1	0.221077	0.52709	0.377764	NA	0	0	0	0
ENSG00000041982	TNC	protein_coding	P24821	0.669769	0.0996926	0.193062	NA	1	1	0	1
ENSG00000041988	THAP3	protein_coding	Q8WTV1	0.04307	0.924146	-0.189114	NA	0	0	0	0
ENSG00000042062	FAM65C	protein_coding	#N/A	0.472378	NA	1.33572	NA	0	0	0	0
ENSG00000042088	TDP1	protein_coding	Q9NUW8	-0.349685	0.0462194	0.164283	0.518384	1	1	0	1
ENSG00000042286	AIFM2	protein_coding	Q9BRQ8	1.17154	1.00107e-08	-0.0368171	0.916262	1	0	1	0
ENSG00000042304	C2orf83	protein_coding	Q53S99	NA	NA	NA	NA	1	0	0	1
ENSG00000042317	SPATA7	protein_coding	Q9P0W8	-0.913518	0.00121224	-0.333132	NA	0	0	0	0
ENSG00000042429	MED17	protein_coding	A0A1W2PRB8	0.106499	0.410974	-0.105319	0.46594	1	1	0	1
ENSG00000042445	RETSAT	protein_coding	Q6NUM9	0.23106	0.233129	0.145847	0.535425	1	1	0	1
ENSG00000042493	CAPG	protein_coding	P40121	0.522551	0.0197893	0.116989	0.71498	0	0	0	0
ENSG00000042753	AP2S1	protein_coding	P53680	0.516345	3.6777e-07	-0.329158	0.00403666	1	0	0	1
ENSG00000042781	USH2A	protein_coding	O75445	0.102887	NA	1.42294	NA	1	0	0	1
ENSG00000042813	ZPBP	protein_coding	Q9BS86	NA	NA	-2.65379	NA	1	1	0	1
ENSG00000042832	TG	protein_coding	P01266	1.70677	NA	1.38002	NA	1	1	0	1
ENSG00000042980	ADAM28	protein_coding	Q9UKQ2	NA	NA	NA	NA	1	1	0	1
ENSG00000043039	BARX2	protein_coding	Q9UMQ3	0.288371	0.557635	0.0277863	NA	0	0	0	0
ENSG00000043093	DCUN1D1	protein_coding	Q96GG9	-0.766351	2.82838e-08	-0.382028	0.0473077	0	0	0	0
ENSG00000043143	JADE2	protein_coding	Q9NQC1	0.575523	0.0929624	0.194151	NA	0	0	0	0
ENSG00000043355	ZIC2	protein_coding	O95409	0.693694	7.47753e-10	-0.0224671	0.914573	0	0	0	0
ENSG00000043462	LCP2	protein_coding	Q13094	NA	NA	-1.02551	NA	0	0	0	0
ENSG00000043514	TRIT1	protein_coding	Q9H3H1	-0.333261	0.0648521	-0.206224	0.350012	0	0	1	0
ENSG00000043591	ADRB1	protein_coding	P08588	-0.302523	NA	-0.818404	NA	1	0	0	1
ENSG00000044012	GUCA2B	protein_coding	Q16661	NA	NA	NA	NA	1	1	0	1
ENSG00000044090	CUL7	protein_coding	Q14999	0.345795	0.0157745	0.28734	0.093772	1	0	0	1
ENSG00000044115	CTNNA1	protein_coding	P35221	0.0447018	0.769186	-0.38296	0.000448575	1	1	0	1
ENSG00000044446	PHKA2	protein_coding	P46019	0.0452002	0.863168	0.239658	0.287277	1	0	0	1
ENSG00000044459	CNTLN	protein_coding	Q9NXG0	-0.260988	0.256935	0.119221	0.692497	0	0	0	0
ENSG00000044524	EPHA3	protein_coding	P29320	-0.0809451	0.805533	0.232649	0.476795	1	1	0	1
ENSG00000044574	HSPA5	protein_coding	P11021	1.38674	7.77394e-63	0.390692	1.20937e-05	1	1	0	1
ENSG00000046604	DSG2	protein_coding	Q14126	0.092052	0.469477	0.213762	0.0665658	1	1	0	1
ENSG00000046647	GEMIN8	protein_coding	Q9NWZ8	-0.0182578	0.95675	-0.193822	0.501281	0	0	0	0
ENSG00000046651	OFD1	protein_coding	O75665	-0.943242	7.9111e-11	0.0581411	0.852841	1	0	0	1
ENSG00000046653	GPM6B	protein_coding	Q13491	0.0766851	0.823913	-0.11331	0.755849	1	0	0	1
ENSG00000046774	MAGEC2	protein_coding	Q9UBF1	1.53291	NA	0.840706	NA	0	0	0	0
ENSG00000046889	PREX2	protein_coding	Q70Z35	-1.06334	0.00131878	-0.145181	NA	1	1	0	1
ENSG00000047056	WDR37	protein_coding	Q9Y2I8	-0.122585	0.503284	0.274023	0.144621	0	0	0	0
ENSG00000047188	YTHDC2	protein_coding	Q9H6S0	-0.562197	1.24488e-07	-0.0438131	0.813108	1	0	0	1
ENSG00000047230	CTPS2	protein_coding	Q9NRF8	-0.540635	0.000231423	-0.0798936	0.76143	0	0	0	0
ENSG00000047249	ATP6V1H	protein_coding	Q9UI12	-0.275753	0.0124806	-0.136265	0.334909	1	0	0	1
ENSG00000047315	POLR2B	protein_coding	P30876	-0.845275	1.13639e-23	-0.176443	0.203658	1	0	0	1
ENSG00000047346	FAM214A	protein_coding	Q32MH5	-0.0536245	0.883007	-0.294973	0.327134	0	0	0	0
ENSG00000047365	ARAP2	protein_coding	Q8WZ64	-0.989401	0.00600468	-0.693857	NA	0	0	0	0
ENSG00000047410	TPR	protein_coding	P12270	-0.581427	4.23695e-14	0.0685054	0.584749	0	0	0	0
ENSG00000047457	CP	protein_coding	P00450	0.55543	NA	2.43166	NA	1	1	0	1
ENSG00000047578	KIAA0556	protein_coding	O60303	-0.0794178	0.766767	0.0636744	0.840861	1	1	0	1
ENSG00000047579	DTNBP1	protein_coding	Q96EV8	0.573473	1.97563e-07	-0.0840788	0.616789	1	0	0	1
ENSG00000047597	XK	protein_coding	P51811	0.539983	0.283703	0.533687	NA	1	1	0	1
ENSG00000047617	ANO2	protein_coding	Q9NQ90	-0.0213828	NA	1.364	NA	1	1	0	1
ENSG00000047621	C12orf4	protein_coding	Q9NQ89	-0.450324	0.000336594	-0.175127	0.314675	0	0	0	0
ENSG00000047634	SCML1	protein_coding	Q9UN30	-0.115492	0.351448	-0.0941145	0.491647	0	0	0	0
ENSG00000047644	WWC3	protein_coding	Q9ULE0	-1.23491	NA	-0.646583	NA	0	0	0	0
ENSG00000047648	ARHGAP6	protein_coding	O43182	2.34233	NA	2.29744	NA	0	1	0	1
ENSG00000047662	FAM184B	protein_coding	#N/A	0.228973	0.821964	0.170956	NA	0	0	0	0
ENSG00000047849	MAP4	protein_coding	P27816	0.00196682	0.989705	-0.201892	0.0526026	1	1	0	1
ENSG00000047932	GOPC	protein_coding	Q9HD26	0.0279686	0.875645	0.0116699	0.957202	1	1	0	1
ENSG00000047936	ROS1	protein_coding	P08922	0.940271	NA	0.898042	NA	1	1	0	1
ENSG00000048028	USP28	protein_coding	Q96RU2	-0.459435	0.000401783	0.148359	0.480257	0	0	0	0
ENSG00000048052	HDAC9	protein_coding	Q9UKV0	-0.947099	0.549643	-1.33046	NA	0	0	0	0
ENSG00000048140	TSPAN17	protein_coding	Q96FV3	0.489562	0.033008	0.37951	0.158804	1	0	0	1
ENSG00000048162	NOP16	protein_coding	Q9Y3C1	-0.18872	0.299117	-0.187651	0.323514	0	0	0	0
ENSG00000048342	CC2D2A	protein_coding	Q9P2K1	-0.285231	0.406659	-0.0922394	NA	0	0	0	0
ENSG00000048392	RRM2B	protein_coding	Q7LG56	-0.544605	0.00343785	0.0355066	0.926448	0	0	0	0
ENSG00000048405	ZNF800	protein_coding	Q2TB10	-0.133604	0.548647	0.14974	0.545808	0	0	0	0
ENSG00000048462	TNFRSF17	protein_coding	Q02223	-1.65423	NA	-0.860022	NA	1	0	0	1
ENSG00000048471	SNX29	protein_coding	Q8TEQ0	-0.062178	0.828825	0.12107	0.691283	0	0	0	0
ENSG00000048540	LMO3	protein_coding	Q8TAP4	0.881165	NA	0.837808	NA	0	0	0	0
ENSG00000048544	MRPS10	protein_coding	P82664	-0.126119	0.505728	-0.206995	0.228546	0	0	1	0
ENSG00000048545	GUCA1A	protein_coding	P43080	-1.85183	NA	NA	NA	0	1	0	1
ENSG00000048649	RSF1	protein_coding	Q96T23	-0.278352	0.0105548	-0.242094	0.050916	0	1	0	1
ENSG00000048707	VPS13D	protein_coding	Q5THJ4	-0.561487	3.92204e-05	0.0329325	0.903593	0	1	0	1
ENSG00000048740	CELF2	protein_coding	O95319	-0.0315403	0.917455	-0.304148	0.174959	0	0	0	0
ENSG00000048828	FAM120A	protein_coding	Q9NZB2	-0.138415	0.350423	0.100482	0.597417	1	0	0	1
ENSG00000048991	R3HDM1	protein_coding	Q15032	-0.937854	3.46977e-11	-0.198139	0.38714	0	0	0	0
ENSG00000049089	COL9A2	protein_coding	Q14055	0.441796	0.744547	1.34939	NA	1	1	0	1
ENSG00000049130	KITLG	protein_coding	P21583	-0.02804	0.946843	0.177771	NA	1	1	0	1
ENSG00000049167	ERCC8	protein_coding	Q13216	-0.0578078	0.878049	0.00419204	0.994894	0	0	0	0
ENSG00000049192	ADAMTS6	protein_coding	Q9UKP5	-0.558795	0.434605	0.0386781	NA	1	1	0	1
ENSG00000049239	H6PD	protein_coding	O95479	0.295529	0.274509	0.198766	0.536121	1	1	0	1
ENSG00000049245	VAMP3	protein_coding	Q15836	-0.281356	0.0508125	-0.265137	0.0949665	1	0	0	1
ENSG00000049246	PER3	protein_coding	P56645	-0.19976	0.81918	0.869692	NA	0	0	0	0
ENSG00000049247	UTS2	protein_coding	O95399	-0.0560756	NA	0.521245	NA	1	1	0	1
ENSG00000049249	TNFRSF9	protein_coding	Q07011	0.275699	0.764976	-0.0345344	NA	1	1	0	1
ENSG00000049283	EPN3	protein_coding	Q9H201	-0.270738	NA	0.00619532	NA	0	1	0	1
ENSG00000049323	LTBP1	protein_coding	Q14766	0.413927	0.0159599	0.787505	1.77752e-05	1	1	0	1
ENSG00000049449	RCN1	protein_coding	Q15293	0.527599	3.3556e-06	0.199762	0.157538	1	1	0	1
ENSG00000049540	ELN	protein_coding	P15502	1.46262	NA	0.54869	NA	1	1	0	1
ENSG00000049541	RFC2	protein_coding	P35250	-0.268729	0.00526767	-0.224572	0.0443011	0	1	0	1
ENSG00000049618	ARID1B	protein_coding	Q8NFD5	0.0409554	0.846195	0.34903	0.0258025	1	0	0	1
ENSG00000049656	CLPTM1L	protein_coding	Q96KA5	-0.407896	0.104494	-0.0301699	0.951007	1	1	0	1
ENSG00000049759	NEDD4L	protein_coding	Q96PU5	-0.264197	0.253483	-0.234594	0.385355	1	0	0	1
ENSG00000049768	FOXP3	protein_coding	Q9BZS1	-0.158076	0.908295	0.932377	NA	0	0	0	0
ENSG00000049769	PPP1R3F	protein_coding	Q6ZSY5	0.656124	0.0977	0.290862	NA	1	0	0	1
ENSG00000049860	HEXB	protein_coding	P07686	-0.00588666	0.977348	0.0221785	0.9264	1	1	0	1
ENSG00000049883	PTCD2	protein_coding	Q8WV60	-0.52926	0.00766678	-0.0648358	0.846034	0	0	1	0
ENSG00000050030	KIAA2022	protein_coding	#N/A	-0.452795	0.403674	-0.573908	NA	0	0	0	0
ENSG00000050130	JKAMP	protein_coding	Q9P055	0.461147	0.00177818	0.281481	0.10488	1	1	0	1
ENSG00000050165	DKK3	protein_coding	Q9UBP4	0.969498	0.34963	-0.0051573	NA	1	1	0	1
ENSG00000050327	ARHGEF5	protein_coding	Q12774	-0.983282	NA	NA	NA	1	1	0	1
ENSG00000050344	NFE2L3	protein_coding	Q9Y4A8	-1.1547	4.8099e-05	0.328131	NA	0	1	0	1
ENSG00000050393	MCUR1	protein_coding	Q96AQ8	-0.00767419	0.975401	0.211207	0.327134	0	0	1	0
ENSG00000050405	LIMA1	protein_coding	Q9UHB6	-0.0503764	0.773787	0.000530345	0.998898	1	1	0	1
ENSG00000050426	LETMD1	protein_coding	Q6P1Q0	0.229996	0.0903716	-0.105652	0.544737	1	0	1	0
ENSG00000050438	SLC4A8	protein_coding	Q2Y0W8	-1.21059	0.0854415	-0.450932	NA	1	0	0	1
ENSG00000050555	LAMC3	protein_coding	Q9Y6N6	0.273221	0.686964	0.438672	NA	1	1	0	1
ENSG00000050628	PTGER3	protein_coding	P43115	-1.43357	NA	-0.0321971	NA	1	0	0	1
ENSG00000050730	TNIP3	protein_coding	Q96KP6	0.940271	NA	-0.063728	NA	0	0	0	0
ENSG00000050748	MAPK9	protein_coding	P45984	-0.548437	8.47013e-06	-0.0762846	0.718544	0	0	0	0
ENSG00000050767	COL23A1	protein_coding	Q86Y22	0.905842	0.442039	0.697538	NA	1	0	0	1
ENSG00000050820	BCAR1	protein_coding	P56945	0.753095	5.70941e-08	-0.0294392	0.898819	1	1	0	1
ENSG00000051009	FAM160A2	protein_coding	Q8N612	0.210064	0.187375	0.223934	0.196698	0	0	0	0
ENSG00000051108	HERPUD1	protein_coding	Q15011	0.229943	0.0275479	0.110383	0.408546	1	1	0	1
ENSG00000051128	HOMER3	protein_coding	Q9NSC5	1.07679	0.0565186	0.71353	NA	1	1	0	1
ENSG00000051180	RAD51	protein_coding	Q06609	0.0241638	0.921532	-0.229445	0.247925	0	0	0	0
ENSG00000051341	POLQ	protein_coding	O75417	-0.439066	9.63058e-05	0.174903	0.279706	0	1	0	1
ENSG00000051382	PIK3CB	protein_coding	P42338	-0.446986	0.0291728	0.122041	0.708913	1	0	0	1
ENSG00000051523	CYBA	protein_coding	P13498	1.35182	1.06827e-29	0.105927	0.54013	1	0	0	1
ENSG00000051596	THOC3	protein_coding	Q96J01	0.513325	3.8403e-05	-0.0824455	0.700089	0	1	0	1
ENSG00000051620	HEBP2	protein_coding	Q9Y5Z4	0.58022	1.33431e-05	-0.202462	0.227195	1	0	0	1
ENSG00000051825	MPHOSPH9	protein_coding	Q99550	-0.591075	4.18885e-08	0.0791761	0.673227	1	1	0	1
ENSG00000052126	PLEKHA5	protein_coding	Q9HAU0	-0.245977	0.20543	-0.0943512	0.734357	1	0	0	1
ENSG00000052344	PRSS8	protein_coding	Q16651	0.0704229	0.95527	0.64468	NA	1	1	0	1
ENSG00000052723	SIKE1	protein_coding	Q9BRV8	0.06335	0.721586	-0.269315	0.0728896	0	1	0	1
ENSG00000052749	RRP12	protein_coding	Q5JTH9	0.338174	0.000123521	0.342756	0.000922115	1	0	0	1
ENSG00000052795	FNIP2	protein_coding	Q9P278	-0.668172	0.024964	0.219124	NA	0	0	0	0
ENSG00000052802	MSMO1	protein_coding	Q15800	-0.609702	4.03753e-05	-0.134537	0.540846	1	0	0	1
ENSG00000052841	TTC17	protein_coding	Q96AE7	-0.0425045	0.841355	0.351734	0.0348054	1	1	0	1
ENSG00000052850	ALX4	protein_coding	Q9H161	0.435051	0.251408	0.168158	NA	0	0	0	0
ENSG00000053108	FSTL4	protein_coding	Q6MZW2	0.131984	0.930609	0.794714	NA	1	1	0	1
ENSG00000053254	FOXN3	protein_coding	O00409	-0.428786	0.11041	0.0726349	NA	0	1	0	1
ENSG00000053328	METTL24	protein_coding	Q5JXM2	0.624483	0.608895	0.381989	NA	1	1	0	1
ENSG00000053371	AKR7A2	protein_coding	O43488	0.308345	0.0289984	-0.189701	0.261332	1	0	1	0
ENSG00000053372	MRTO4	protein_coding	Q9UKD2	0.305576	0.00212182	0.00417873	0.984344	0	0	0	0
ENSG00000053438	NNAT	protein_coding	Q16517	0.350024	0.785299	0.036547	NA	0	0	0	0
ENSG00000053501	USE1	protein_coding	Q9NZ43	0.582355	0.000125087	0.188656	0.364969	1	0	0	1
ENSG00000053524	MCF2L2	protein_coding	Q86YR7	-1.09905	0.14849	-0.364507	NA	0	1	0	1
ENSG00000053702	NRIP2	protein_coding	Q9BQI9	-1.09303	0.386589	0.0919347	NA	0	0	0	0
ENSG00000053747	LAMA3	protein_coding	Q16787	-0.369388	0.0447658	0.19719	0.439112	1	1	0	1
ENSG00000053770	AP5M1	protein_coding	Q9H0R1	-0.609928	6.51133e-05	-0.00128408	0.997617	1	0	0	1
ENSG00000053900	ANAPC4	protein_coding	Q9UJX5	-0.851749	2.13217e-12	0.00153882	0.996314	0	0	0	0
ENSG00000053918	KCNQ1	protein_coding	P51787	1.02908	0.428396	1.11976	NA	1	0	0	1
ENSG00000054116	TRAPPC3	protein_coding	O43617	-0.336205	0.000340313	-0.194176	0.126523	1	1	0	1
ENSG00000054118	THRAP3	protein_coding	Q9Y2W1	-0.102924	0.358709	-0.411938	1.19942e-05	0	0	0	0
ENSG00000054148	PHPT1	protein_coding	Q9NRX4	-0.125423	0.377649	-0.327548	0.00744533	0	0	0	0
ENSG00000054179	ENTPD2	protein_coding	Q9Y5L3	-0.237982	NA	-0.0800415	NA	1	0	0	1
ENSG00000054219	LY75	protein_coding	O60449	NA	NA	NA	NA	1	1	0	1
ENSG00000054267	ARID4B	protein_coding	Q4LE39	-0.370218	0.000299832	-0.0887083	0.573844	0	1	0	1
ENSG00000054277	OPN3	protein_coding	Q9H1Y3	-2.45788	NA	-1.68137	NA	1	0	0	1
ENSG00000054282	SDCCAG8	protein_coding	Q86SQ7	-0.596916	NA	-0.468025	NA	0	0	0	0
ENSG00000054356	PTPRN	protein_coding	Q16849	0.737962	NA	0.692391	NA	1	1	0	1
ENSG00000054392	HHAT	protein_coding	Q5VTY9	NA	NA	NA	NA	1	1	0	1
ENSG00000054523	KIF1B	protein_coding	O60333	-0.283903	0.00179249	-0.037669	0.807582	1	0	1	0
ENSG00000054598	FOXC1	protein_coding	Q12948	0.000818645	0.995693	-0.0474158	0.787263	0	0	0	0
ENSG00000054611	TBC1D22A	protein_coding	Q8WUA7	0.0456202	0.900444	0.404877	0.180295	0	1	0	1
ENSG00000054654	SYNE2	protein_coding	Q8WXH0	-0.644239	6.17886e-08	0.0789022	0.718282	1	0	0	1
ENSG00000054690	PLEKHH1	protein_coding	Q9ULM0	0.0243514	0.941985	0.389775	0.134293	0	0	0	0
ENSG00000054793	ATP9A	protein_coding	O75110	0.00335125	0.989837	0.303698	0.146195	1	0	0	1
ENSG00000054796	SPO11	protein_coding	Q9Y5K1	NA	NA	NA	NA	0	0	0	0
ENSG00000054803	CBLN4	protein_coding	Q9NTU7	NA	NA	-1.02551	NA	1	1	0	1
ENSG00000054938	CHRDL2	protein_coding	Q6WN34	-1.3341	NA	-0.69549	NA	1	1	0	1
ENSG00000054965	FAM168A	protein_coding	Q92567	-0.383261	0.0716332	-0.046605	0.895826	0	0	0	0
ENSG00000054967	RELT	protein_coding	Q969Z4	0.506524	0.113098	0.240709	NA	1	1	0	1
ENSG00000054983	GALC	protein_coding	P54803	0.47326	0.137338	0.258765	NA	1	1	0	1
ENSG00000055044	NOP58	protein_coding	Q9Y2X3	-0.243936	0.00424583	-0.21999	0.05314	1	0	0	1
ENSG00000055070	SZRD1	protein_coding	#N/A	-0.473848	0.00642588	-0.0515607	0.869212	0	0	0	0
ENSG00000055118	KCNH2	protein_coding	Q12809	0.786385	0.110838	-0.0983158	NA	1	0	0	1
ENSG00000055130	CUL1	protein_coding	Q13616	-0.304452	0.00211457	-0.121942	0.349856	0	0	0	0
ENSG00000055147	FAM114A2	protein_coding	Q9NRY5	-0.0646997	0.778035	-0.275416	0.108374	0	1	0	1
ENSG00000055163	CYFIP2	protein_coding	Q96F07	-0.258942	0.0392672	-0.0276622	0.899042	1	1	0	1
ENSG00000055208	TAB2	protein_coding	Q9NYJ8	-0.41634	0.00122643	0.112384	0.578969	1	0	0	1
ENSG00000055211	GINM1	protein_coding	Q9NU53	-0.383625	0.00899518	-0.0699339	0.783066	1	1	0	1
ENSG00000055332	EIF2AK2	protein_coding	P19525	-0.509173	2.33896e-07	-0.18337	0.188024	1	0	0	1
ENSG00000055483	USP36	protein_coding	Q9P275	-0.16861	0.20924	0.262202	0.0342547	0	0	0	0
ENSG00000055609	KMT2C	protein_coding	Q8NEZ4	-0.448701	4.69649e-06	0.291734	0.0208379	0	0	0	0
ENSG00000055732	MCOLN3	protein_coding	Q8TDD5	-0.577279	0.00227685	0.392318	0.154841	1	0	0	1
ENSG00000055813	CCDC85A	protein_coding	#N/A	0.940271	NA	-2.46456	NA	0	1	0	1
ENSG00000055917	PUM2	protein_coding	Q8TB72	-0.386946	0.000296587	0.0208056	0.919342	0	0	0	0
ENSG00000055950	MRPL43	protein_coding	Q8N983	0.450584	0.000624091	-0.192444	0.122685	0	0	1	0
ENSG00000055955	ITIH4	protein_coding	Q14624	-0.71699	NA	-0.0992416	NA	1	1	0	1
ENSG00000055957	ITIH1	protein_coding	P19827	-0.855354	0.526869	-0.372356	NA	1	1	0	1
ENSG00000056050	HPF1	protein_coding	Q9NWY4	-0.21104	0.254654	-0.117809	0.597417	0	0	0	0
ENSG00000056097	ZFR	protein_coding	Q96KR1	-0.1615	0.0914116	-0.204355	0.0541029	0	0	0	0
ENSG00000056277	ZNF280C	protein_coding	Q8ND82	-0.488992	5.49201e-07	-0.239293	0.0531457	0	0	0	0
ENSG00000056291	NPFFR2	protein_coding	Q9Y5X5	-0.371833	NA	0.00978582	NA	1	1	0	1
ENSG00000056487	PHF21B	protein_coding	Q96EK2	0.381517	0.220307	0.250858	NA	0	0	0	0
ENSG00000056558	TRAF1	protein_coding	Q13077	0.166795	0.818321	0.509225	NA	0	0	0	0
ENSG00000056586	RC3H2	protein_coding	Q9HBD1	-0.633738	1.5847e-07	0.0563904	0.797299	1	1	0	1
ENSG00000056736	IL17RB	protein_coding	Q9NRM6	0.0571589	0.895157	0.0342072	NA	1	0	0	1
ENSG00000056972	TRAF3IP2	protein_coding	O43734	-0.0476205	0.927773	-0.286595	NA	0	1	0	1
ENSG00000056998	GYG2	protein_coding	O15488	-0.374832	0.258653	-0.415611	NA	0	0	0	0
ENSG00000057019	DCBLD2	protein_coding	Q96PD2	-0.120274	0.611441	0.260087	0.314938	1	1	0	1
ENSG00000057149	SERPINB3	protein_coding	P29508	NA	NA	NA	NA	1	1	0	1
ENSG00000057252	SOAT1	protein_coding	P35610	-0.0526868	0.723716	0.14215	0.313763	1	1	0	1
ENSG00000057294	PKP2	protein_coding	Q99959	-0.163612	0.572097	-0.279635	0.308373	1	1	0	1
ENSG00000057468	MSH4	protein_coding	O15457	-0.111079	0.923053	0.987422	NA	0	0	0	0
ENSG00000057593	F7	protein_coding	P08709	-2.43658	NA	NA	NA	1	1	0	1
ENSG00000057608	GDI2	protein_coding	P50395	-0.437653	6.0353e-07	-0.116496	0.324085	1	0	0	1
ENSG00000057657	PRDM1	protein_coding	O75626	0.981468	0.413125	0.922134	NA	0	0	0	0
ENSG00000057663	ATG5	protein_coding	Q9H1Y0	-0.33069	0.048061	-0.03976	0.887737	1	1	0	1
ENSG00000057704	TMCC3	protein_coding	Q9ULS5	0.00159715	0.997891	-0.369969	NA	1	1	0	1
ENSG00000057757	PITHD1	protein_coding	Q9GZP4	-0.690361	0.000338745	-0.484126	0.0362173	0	0	0	0
ENSG00000057935	MTA3	protein_coding	Q9BTC8	-0.228548	0.220698	-0.114096	0.63479	0	1	0	1
ENSG00000058056	USP13	protein_coding	Q92995	-0.418794	0.0281705	-0.0898785	0.769933	0	0	0	0
ENSG00000058063	ATP11B	protein_coding	Q9Y2G3	-0.701088	1.25355e-05	0.218448	0.390103	1	0	0	1
ENSG00000058085	LAMC2	protein_coding	Q13753	-0.472047	0.524512	-0.0142164	NA	1	1	0	1
ENSG00000058091	CDK14	protein_coding	O94921	-0.692931	0.0366581	-0.188861	NA	1	0	0	1
ENSG00000058262	SEC61A1	protein_coding	P61619	0.95649	1.55422e-29	0.459947	2.74311e-06	1	1	0	1
ENSG00000058272	PPP1R12A	protein_coding	O14974	-0.33165	0.000874802	-0.252381	0.0264393	0	0	0	0
ENSG00000058335	RASGRF1	protein_coding	Q13972	0.152582	NA	0.137548	NA	1	1	0	1
ENSG00000058404	CAMK2B	protein_coding	Q13554	0.823627	0.0644611	0.681631	NA	1	1	0	1
ENSG00000058453	CROCC	protein_coding	Q5TZA2	0.0707927	0.882216	0.0836317	NA	1	1	0	1
ENSG00000058600	POLR3E	protein_coding	Q9NVU0	0.038898	0.831202	0.115477	0.491433	0	0	0	0
ENSG00000058668	ATP2B4	protein_coding	P23634	0.0903105	0.580951	0.259652	0.0785972	1	1	0	1
ENSG00000058673	ZC3H11A	protein_coding	O75152	-0.714626	4.59751e-08	-0.519416	0.000481169	0	0	0	0
ENSG00000058729	RIOK2	protein_coding	Q9BVS4	-0.818493	9.23883e-19	-0.560144	2.13003e-08	0	1	0	1
ENSG00000058799	YIPF1	protein_coding	Q9Y548	-0.0107102	0.977348	0.113794	0.770438	1	0	0	1
ENSG00000058804	NDC1	protein_coding	Q9BTX1	-0.212209	0.100915	0.135982	0.408371	1	1	0	1
ENSG00000058866	DGKG	protein_coding	P49619	NA	NA	-1.97796	NA	1	1	0	1
ENSG00000059122	FLYWCH1	protein_coding	Q4VC44	0.673736	2.0879e-07	-0.00360589	0.990107	0	0	0	0
ENSG00000059145	UNKL	protein_coding	Q9H9P5	0.657129	0.00132695	0.128668	0.640147	0	0	0	0
ENSG00000059377	TBXAS1	protein_coding	P24557	0.581904	0.399891	-0.149851	NA	1	1	0	1
ENSG00000059378	PARP12	protein_coding	Q9H0J9	-0.639829	NA	-0.462333	NA	0	0	0	0
ENSG00000059573	ALDH18A1	protein_coding	P54886	-0.160351	0.0926863	-0.0994022	0.433794	0	0	1	0
ENSG00000059588	TARBP1	protein_coding	Q13395	-0.432771	4.14969e-05	0.365821	0.0036091	0	0	0	0
ENSG00000059691	GATB	protein_coding	O75879	0.271278	0.139672	-0.105167	0.659739	0	0	1	0
ENSG00000059728	MXD1	protein_coding	Q05195	-0.188619	0.36126	-0.262621	0.215949	0	0	0	0
ENSG00000059758	CDK17	protein_coding	Q00537	-0.657291	1.60189e-05	-0.24281	0.27401	0	0	0	0
ENSG00000059769	DNAJC25	protein_coding	Q9H1X3	0.554441	0.000258639	0.146828	0.481928	1	0	0	1
ENSG00000059804	SLC2A3	protein_coding	P11169	0.444491	0.158039	-0.0051143	NA	1	1	0	1
ENSG00000059915	PSD	protein_coding	A5PKW4	0.0492016	0.943519	0.125936	NA	0	1	0	1
ENSG00000060069	CTDP1	protein_coding	Q9Y5B0	0.270064	0.586925	0.606001	NA	0	1	0	1
ENSG00000060138	YBX3	protein_coding	P16989	0.172419	0.0975528	-0.0887268	0.440911	0	0	0	0
ENSG00000060140	STYK1	protein_coding	Q6J9G0	0.0621705	0.957489	0.561882	NA	1	1	0	1
ENSG00000060237	WNK1	protein_coding	Q9H4A3	-0.286296	0.00163835	0.00153779	0.994894	1	1	0	1
ENSG00000060303	RPS17P5	processed_pseudogene	#N/A	-1.14452	NA	-1.37804	NA	0	0	0	0
ENSG00000060339	CCAR1	protein_coding	Q8IX12	-0.437425	7.44205e-07	-0.1315	0.286839	0	1	0	1
ENSG00000060491	OGFR	protein_coding	Q9NZT2	0.149854	0.45422	-0.208006	0.309204	1	0	0	1
ENSG00000060558	GNA15	protein_coding	P30679	-0.153974	NA	-0.0293848	NA	1	0	0	1
ENSG00000060566	CREB3L3	protein_coding	Q68CJ9	1.91103	NA	0.899959	NA	1	0	0	1
ENSG00000060642	PIGV	protein_coding	Q9NUD9	-0.170869	0.583726	0.179471	0.624293	1	1	0	1
ENSG00000060656	PTPRU	protein_coding	Q92729	0.402235	0.00944249	0.301967	0.0833112	1	0	0	1
ENSG00000060688	SNRNP40	protein_coding	Q96DI7	-0.249391	0.024379	-0.181313	0.135928	0	0	0	0
ENSG00000060709	RIMBP2	protein_coding	O15034	0.474222	NA	2.33318	NA	1	0	0	1
ENSG00000060718	COL11A1	protein_coding	P12107	1.03341	NA	2.79881	NA	1	1	0	1
ENSG00000060749	QSER1	protein_coding	#N/A	-0.690006	2.3351e-07	-0.0401422	0.878236	0	0	0	0
ENSG00000060762	MPC1	protein_coding	Q9Y5U8	-0.180579	0.221088	-0.203648	0.208503	0	0	1	0
ENSG00000060971	ACAA1	protein_coding	P09110	0.850233	5.6359e-16	0.0355465	0.840758	1	1	1	1
ENSG00000060982	BCAT1	protein_coding	P54687	-0.21517	0.0497247	0.0783858	0.597417	0	0	0	0
ENSG00000061273	HDAC7	protein_coding	Q8WUI4	0.478932	0.00778678	0.227978	0.330124	0	0	0	0
ENSG00000061337	LZTS1	protein_coding	Q9Y250	-0.125721	0.935808	-0.426619	NA	0	1	0	1
ENSG00000061455	PRDM6	protein_coding	Q9NQX0	-0.145479	0.744903	0.0606526	NA	0	0	0	0
ENSG00000061492	WNT8A	protein_coding	Q9H1J5	-0.983282	NA	-2.47163	NA	1	1	0	1
ENSG00000061656	SPAG4	protein_coding	Q9NPE6	0.090812	0.901103	0.273164	NA	1	0	0	1
ENSG00000061676	NCKAP1	protein_coding	Q9Y2A7	0.148543	0.237284	0.00489256	0.983396	1	0	0	1
ENSG00000061794	MRPS35	protein_coding	P82673	-0.121229	0.432523	-0.0953376	0.564783	0	0	1	0
ENSG00000061918	GUCY1B3	protein_coding	#N/A	0.0655858	0.80574	-0.20588	0.353606	0	0	0	0
ENSG00000061936	SFSWAP	protein_coding	Q12872	-0.0357891	0.852247	0.0626003	0.760676	0	1	0	1
ENSG00000061938	TNK2	protein_coding	Q07912	0.605743	0.000535017	0.287197	0.195444	1	0	0	1
ENSG00000061987	MON2	protein_coding	Q7Z3U7	-0.265816	0.0324197	0.296846	0.0512705	0	0	0	0
ENSG00000062038	CDH3	protein_coding	P22223	0.791953	0.468197	0.819726	NA	1	1	0	1
ENSG00000062096	ARSF	protein_coding	P54793	NA	NA	NA	NA	1	0	0	1
ENSG00000062194	GPBP1	protein_coding	Q86WP2	-0.251507	0.0263021	-0.217186	0.0863695	1	1	0	1
ENSG00000062282	DGAT2	protein_coding	Q96PD7	0.642396	0.507726	-0.174895	NA	1	0	0	1
ENSG00000062370	ZNF112	protein_coding	Q9UJU3	-0.421116	0.574631	0.169684	NA	0	0	0	0
ENSG00000062485	CS	protein_coding	O75390	-0.228564	0.0150753	-0.0481811	0.739949	0	0	1	0
ENSG00000062524	LTK	protein_coding	P29376	0.713701	0.191881	0.472432	NA	1	1	0	1
ENSG00000062582	MRPS24	protein_coding	Q96EL2	1.02156	0.0514814	0.142711	NA	0	1	1	1
ENSG00000062598	ELMO2	protein_coding	Q96JJ3	0.452816	0.000219862	-0.0600912	0.758148	1	0	0	1
ENSG00000062650	WAPL	protein_coding	Q7Z5K2	-0.497141	8.96549e-09	-0.165	0.135091	0	0	0	0
ENSG00000062716	VMP1	protein_coding	Q96GC9	-0.740997	1.05707e-14	-0.0757608	0.612075	1	1	0	1
ENSG00000062725	APPBP2	protein_coding	Q92624	0.0561158	0.712518	-0.270302	0.0231614	0	0	0	0
ENSG00000062822	POLD1	protein_coding	P28340	0.50416	0.000107901	0.140845	0.405661	1	0	0	1
ENSG00000063015	SEZ6	protein_coding	Q53EL9	-0.488053	NA	0.980356	NA	1	0	0	1
ENSG00000063046	EIF4B	protein_coding	P23588	-0.0405542	0.874907	-0.11939	0.621182	0	0	0	0
ENSG00000063127	SLC6A16	protein_coding	Q9GZN6	0.607669	0.178587	0.684423	NA	1	1	0	1
ENSG00000063169	GLTSCR1	protein_coding	#N/A	0.214821	0.329461	0.3604	0.105311	0	0	0	0
ENSG00000063176	SPHK2	protein_coding	Q9NRA0	0.658745	0.00721708	0.410115	0.12439	1	1	0	1
ENSG00000063177	RPL18	protein_coding	Q07020	0.918578	2.10844e-30	-0.112934	0.299704	1	1	0	1
ENSG00000063180	CA11	protein_coding	O75493	0.540592	0.0635972	0.0105594	0.98428	1	1	0	1
ENSG00000063241	ISOC2	protein_coding	Q96AB3	0.627837	8.8793e-05	0.208189	0.284981	0	0	1	0
ENSG00000063244	U2AF2	protein_coding	P26368	0.379518	5.10371e-07	-0.129597	0.184699	0	0	0	0
ENSG00000063245	EPN1	protein_coding	Q9Y6I3	0.495728	9.56445e-05	0.419431	0.00370776	1	0	0	1
ENSG00000063322	MED29	protein_coding	Q9NX70	-0.019113	0.939393	-0.127901	0.569014	0	0	0	0
ENSG00000063438	AHRR	protein_coding	A9YTQ3	0.0796307	0.762281	0.217776	0.391642	0	0	0	0
ENSG00000063515	GSC2	protein_coding	O15499	0.0841767	NA	2.47903	NA	0	0	0	0
ENSG00000063587	ZNF275	protein_coding	Q9NSD4	-0.102105	0.675449	0.073966	0.787548	0	0	0	0
ENSG00000063601	MTMR1	protein_coding	Q13613	0.123079	0.453701	0.0647909	0.753276	1	0	0	1
ENSG00000063660	GPC1	protein_coding	P35052	0.631969	0.000316989	0.0239813	0.940447	1	1	0	1
ENSG00000063761	ADCK1	protein_coding	Q86TW2	0.479305	0.0281681	0.442103	0.0597929	1	1	1	1
ENSG00000063854	HAGH	protein_coding	Q16775	1.17809	3.99787e-23	0.137261	0.391129	0	0	1	0
ENSG00000063978	RNF4	protein_coding	P78317	-0.0194768	0.932233	0.118536	0.570524	0	0	0	0
ENSG00000064012	CASP8	protein_coding	Q14790	0.14165	0.514822	-0.293994	0.138636	0	0	1	0
ENSG00000064042	LIMCH1	protein_coding	Q9UPQ0	0.116797	0.862642	-0.178463	NA	0	0	0	0
ENSG00000064102	ASUN	protein_coding	#N/A	-0.451329	4.10916e-07	-0.00914845	0.967477	0	0	0	0
ENSG00000064115	TM7SF3	protein_coding	Q9NS93	-0.00470149	0.987023	0.0968544	0.727059	1	1	0	1
ENSG00000064195	DLX3	protein_coding	O60479	0.0591915	0.968094	0.22906	NA	0	0	0	0
ENSG00000064199	SPA17	protein_coding	Q15506	-0.775544	0.034804	-0.715384	NA	0	1	0	1
ENSG00000064201	TSPAN32	protein_coding	Q96QS1	-0.0214991	NA	0.898042	NA	1	0	0	1
ENSG00000064205	WISP2	protein_coding	O76076	0.589791	NA	3.96816	NA	1	1	0	1
ENSG00000064218	DMRT3	protein_coding	Q9NQL9	0.98509	NA	-0.164912	NA	0	0	0	0
ENSG00000064225	ST3GAL6	protein_coding	Q9Y274	0.228723	0.501666	0.182405	NA	1	0	0	1
ENSG00000064270	ATP2C2	protein_coding	O75185	0.715026	NA	-0.371459	NA	1	1	0	1
ENSG00000064300	NGFR	protein_coding	P08138	0.735585	0.617854	-0.481035	NA	1	1	0	1
ENSG00000064309	CDON	protein_coding	Q4KMG0	0.170446	0.354792	0.280986	0.142169	1	1	0	1
ENSG00000064313	TAF2	protein_coding	Q6P1X5	-0.318617	0.00786185	0.20929	0.190363	0	0	0	0
ENSG00000064393	HIPK2	protein_coding	Q9H2X6	-0.337533	0.0222807	0.154306	0.396595	0	0	0	0
ENSG00000064419	TNPO3	protein_coding	Q9Y5L0	-0.150253	0.229796	0.249267	0.0633067	0	1	0	1
ENSG00000064489	BORCS8-MEF2B	protein_coding	H3BNR1	0.940271	NA	0.898042	NA	0	0	0	0
ENSG00000064490	RFXANK	protein_coding	O14593	1.00417	4.73953e-09	0.221357	0.312108	0	0	0	0
ENSG00000064545	TMEM161A	protein_coding	Q9NX61	1.0211	4.66249e-25	0.409149	0.000270102	1	0	0	1
ENSG00000064547	LPAR2	protein_coding	Q9HBW0	0.728712	0.32788	0.811389	NA	1	0	0	1
ENSG00000064601	CTSA	protein_coding	P10619	0.610935	0.000307376	0.423739	0.0324956	1	1	0	1
ENSG00000064607	SUGP2	protein_coding	Q8IX01	0.0165208	0.912966	0.153669	0.209404	0	0	0	0
ENSG00000064651	SLC12A2	protein_coding	P55011	-0.289471	0.0201084	0.204329	0.194149	1	1	0	1
ENSG00000064652	SNX24	protein_coding	Q9Y343	-1.19544	0.00248997	-0.596795	NA	0	1	0	1
ENSG00000064655	EYA2	protein_coding	O00167	-0.010681	0.986158	-0.327443	NA	0	0	0	0
ENSG00000064666	CNN2	protein_coding	Q99439	0.288636	0.0993342	-0.393958	0.0191252	1	0	0	1
ENSG00000064687	ABCA7	protein_coding	Q8IZY2	0.84496	0.000483123	0.457546	0.0931584	1	1	0	1
ENSG00000064692	SNCAIP	protein_coding	Q9Y6H5	-0.153732	0.870552	-0.0890618	NA	0	0	0	0
ENSG00000064703	DDX20	protein_coding	Q9UHI6	-0.309045	0.00530939	-0.0904246	0.578317	1	1	0	1
ENSG00000064726	BTBD1	protein_coding	Q9H0C5	0.0370167	0.80892	0.0679392	0.659665	0	0	0	0
ENSG00000064763	FAR2	protein_coding	Q96K12	0.273618	0.142367	-0.109356	0.635121	1	1	0	1
ENSG00000064787	BCAS1	protein_coding	O75363	-0.807101	NA	-1.49038	NA	0	1	0	1
ENSG00000064835	POU1F1	protein_coding	P28069	NA	NA	NA	NA	0	0	0	0
ENSG00000064886	CHI3L2	protein_coding	Q15782	-0.983282	NA	NA	NA	1	1	0	1
ENSG00000064932	SBNO2	protein_coding	Q9Y2G9	-0.0120645	0.994568	2.55398	NA	0	0	0	0
ENSG00000064933	PMS1	protein_coding	P54277	-0.339661	0.0166941	0.00424816	0.989455	0	0	0	0
ENSG00000064961	HMG20B	protein_coding	Q9P0W2	-0.069366	0.809994	-0.0272595	0.943268	0	0	0	0
ENSG00000064989	CALCRL	protein_coding	Q16602	-0.819151	0.239477	-0.428167	NA	1	1	0	1
ENSG00000064995	TAF11	protein_coding	Q15544	0.428818	0.0272842	0.139647	0.597474	1	1	0	1
ENSG00000064999	ANKS1A	protein_coding	Q92625	0.0770572	0.70064	0.0228563	0.926448	0	0	0	0
ENSG00000065000	AP3D1	protein_coding	O14617	-0.000344323	0.997717	0.216355	0.0279054	1	0	0	1
ENSG00000065029	ZNF76	protein_coding	P36508	0.26533	0.215051	0.419757	0.074917	0	0	0	0
ENSG00000065054	SLC9A3R2	protein_coding	Q15599	-0.0361995	0.905341	0.147056	0.621265	1	1	0	1
ENSG00000065057	NTHL1	protein_coding	P78549	0.464804	0.00154992	-0.237377	0.154911	0	0	1	0
ENSG00000065060	UHRF1BP1	protein_coding	Q6BDS2	-0.380628	0.00500504	0.12941	0.529653	0	0	0	0
ENSG00000065135	GNAI3	protein_coding	P08754	-0.54892	6.03556e-09	-0.177469	0.146134	1	0	0	1
ENSG00000065150	IPO5	protein_coding	O00410	-0.232727	0.0324406	0.0932797	0.569979	1	0	0	1
ENSG00000065154	OAT	protein_coding	P04181	0.312432	0.000136198	-0.279185	0.00332385	0	0	1	0
ENSG00000065183	WDR3	protein_coding	Q9UNX4	-0.22617	0.0303489	-0.165253	0.171319	0	0	0	0
ENSG00000065243	PKN2	protein_coding	Q16513	-0.462725	5.74769e-06	0.0770823	0.630821	1	1	0	1
ENSG00000065268	WDR18	protein_coding	Q9BV38	0.338538	0.00648486	0.0514504	0.800992	0	0	0	0
ENSG00000065308	TRAM2	protein_coding	Q15035	1.48671	2.18536e-12	0.33093	0.16929	1	0	0	1
ENSG00000065320	NTN1	protein_coding	O95631	0.34622	0.119848	0.215571	0.422533	1	1	0	1
ENSG00000065325	GLP2R	protein_coding	O95838	NA	NA	NA	NA	1	1	0	1
ENSG00000065328	MCM10	protein_coding	Q7L590	-0.0869563	0.400069	-0.357585	3.38955e-05	0	0	0	0
ENSG00000065357	DGKA	protein_coding	P23743	-0.239404	0.468915	-0.179222	NA	1	1	0	1
ENSG00000065361	ERBB3	protein_coding	P21860	-0.494079	0.129773	-0.215556	NA	1	1	0	1
ENSG00000065371	ROPN1	protein_coding	Q9HAT0	-2.0419	NA	NA	NA	0	0	0	0
ENSG00000065413	ANKRD44	protein_coding	Q8N8A2	-0.0346255	0.981314	-0.0964341	NA	0	0	0	0
ENSG00000065427	KARS	protein_coding	Q15046	0.0494754	0.70651	-0.13055	0.260355	1	0	1	0
ENSG00000065457	ADAT1	protein_coding	Q9BUB4	-0.660202	6.36821e-05	0.0338929	0.924177	0	0	0	0
ENSG00000065485	PDIA5	protein_coding	Q14554	0.584189	4.87871e-07	0.233442	0.101835	1	1	0	1
ENSG00000065491	TBC1D22B	protein_coding	Q9NU19	-0.667397	0.00041204	-0.0797872	0.823716	0	0	0	0
ENSG00000065518	NDUFB4	protein_coding	O95168	0.708286	2.26373e-06	-0.11853	0.54013	1	0	1	0
ENSG00000065526	SPEN	protein_coding	Q96T58	-0.273966	0.0146635	-0.0810178	0.597417	0	0	0	0
ENSG00000065534	MYLK	protein_coding	Q15746	-0.333168	0.414405	-0.0928762	NA	1	1	0	1
ENSG00000065548	ZC3H15	protein_coding	Q8WU90	-0.635324	5.19449e-13	-0.268117	0.0140986	0	0	0	0
ENSG00000065559	MAP2K4	protein_coding	P45985	-0.803021	7.89922e-06	-0.419804	0.0816466	0	1	0	1
ENSG00000065600	TMEM206	protein_coding	Q9H813	1.01058	9.24237e-12	0.368502	0.0331147	1	0	0	1
ENSG00000065609	SNAP91	protein_coding	O60641	-0.204823	0.643201	0.0240952	NA	1	0	0	1
ENSG00000065613	SLK	protein_coding	Q9H2G2	-0.290585	0.00273076	-0.261861	0.0108592	0	1	0	1
ENSG00000065615	CYB5R4	protein_coding	Q7L1T6	-0.939245	0.000148738	-0.440399	NA	1	0	0	1
ENSG00000065618	COL17A1	protein_coding	Q9UMD9	-0.876255	NA	-0.870051	NA	1	1	0	1
ENSG00000065621	GSTO2	protein_coding	Q9H4Y5	-0.0599976	0.932405	-0.446827	NA	0	0	0	0
ENSG00000065665	SEC61A2	protein_coding	Q9H9S3	-0.07585	0.711386	0.100192	0.647339	1	0	0	1
ENSG00000065675	PRKCQ	protein_coding	Q04759	-0.128299	0.667941	-0.378819	0.135928	1	0	0	1
ENSG00000065717	TLE2	protein_coding	Q04725	0.71787	0.0904614	-0.26084	NA	1	0	0	1
ENSG00000065802	ASB1	protein_coding	Q9Y576	0.200228	0.374647	0.422979	0.0640472	0	0	0	0
ENSG00000065809	FAM107B	protein_coding	#N/A	-0.800523	5.00881e-05	-0.577045	0.0166958	0	1	0	1
ENSG00000065833	ME1	protein_coding	P48163	0.178602	0.316219	-0.25328	0.137625	0	1	1	1
ENSG00000065882	TBC1D1	protein_coding	Q86TI0	0.223091	0.435901	0.16087	0.63479	0	0	0	0
ENSG00000065883	CDK13	protein_coding	Q14004	-0.648419	1.37058e-06	-0.122986	0.573977	1	0	0	1
ENSG00000065911	MTHFD2	protein_coding	P13995	0.00496418	0.982726	-0.251646	0.145302	1	1	1	1
ENSG00000065923	SLC9A7	protein_coding	Q96T83	0.144377	0.504139	0.0919944	0.701791	1	1	0	1
ENSG00000065970	FOXJ2	protein_coding	Q9P0K8	0.468904	0.0100094	-0.105339	0.665348	0	0	0	0
ENSG00000065978	YBX1	protein_coding	P67809	0.230862	0.0431338	-0.0995859	0.523678	1	1	0	1
ENSG00000065989	PDE4A	protein_coding	P27815	0.125767	0.823913	0.237016	NA	1	1	0	1
ENSG00000066027	PPP2R5A	protein_coding	Q15172	0.78471	2.91294e-08	0.0295866	0.915607	1	0	0	1
ENSG00000066032	CTNNA2	protein_coding	P26232	NA	NA	-1.02551	NA	0	0	0	0
ENSG00000066044	ELAVL1	protein_coding	Q15717	0.242826	0.004724	-0.0801295	0.507506	1	0	0	1
ENSG00000066056	TIE1	protein_coding	P35590	0.00109697	NA	1.79817	NA	1	1	0	1
ENSG00000066084	DIP2B	protein_coding	Q9P265	-0.15007	0.242698	-0.0963037	0.543785	1	1	0	1
ENSG00000066117	SMARCD1	protein_coding	Q96GM5	0.505717	3.43111e-06	-0.193766	0.14624	0	1	0	1
ENSG00000066135	KDM4A	protein_coding	O75164	-0.200712	0.0766879	0.0669942	0.668931	0	0	0	0
ENSG00000066136	NFYC	protein_coding	Q13952	-0.293725	0.122732	-0.246795	0.276009	0	0	0	0
ENSG00000066185	ZMYND12	protein_coding	Q9H0C1	0.434394	0.760314	0.357042	NA	0	0	0	0
ENSG00000066230	SLC9A3	protein_coding	P48764	1.37579	0.0178227	0.626536	NA	1	1	0	1
ENSG00000066248	NGEF	protein_coding	Q8N5V2	0.507516	0.117726	0.0213945	NA	1	1	0	1
ENSG00000066279	ASPM	protein_coding	Q8IZT6	-0.821157	6.75201e-15	0.211855	0.182527	0	1	0	1
ENSG00000066294	CD84	protein_coding	Q9UIB8	0.940271	NA	0.898042	NA	1	0	0	1
ENSG00000066322	ELOVL1	protein_coding	Q9BW60	0.958305	1.84663e-15	0.282437	0.0485205	1	1	0	1
ENSG00000066336	SPI1	protein_coding	P17947	1.26326	NA	1.22823	NA	0	0	0	0
ENSG00000066379	ZNRD1	protein_coding	Q9P1U0	1.81063	NA	1.76645	NA	0	0	0	0
ENSG00000066382	MPPED2	protein_coding	Q15777	-0.211074	0.784542	0.341849	NA	0	1	0	1
ENSG00000066405	CLDN18	protein_coding	P56856	-1.2879	NA	1.46829	NA	1	0	0	1
ENSG00000066422	ZBTB11	protein_coding	O95625	-0.494641	0.000193411	0.0197902	0.94876	0	0	0	0
ENSG00000066427	ATXN3	protein_coding	P54252	-0.206141	0.258653	-0.161754	0.464501	1	1	0	1
ENSG00000066455	GOLGA5	protein_coding	Q8TBA6	-0.406602	0.000296764	-0.211731	0.152213	1	1	0	1
ENSG00000066468	FGFR2	protein_coding	P21802	-0.400333	0.0513709	0.15064	0.628527	1	1	0	1
ENSG00000066557	LRRC40	protein_coding	Q9H9A6	-0.300245	0.0018528	-0.204644	0.093585	1	0	0	1
ENSG00000066583	ISOC1	protein_coding	Q96CN7	0.720332	5.10589e-06	0.12979	0.564783	1	1	0	1
ENSG00000066629	EML1	protein_coding	O00423	-0.14524	0.619145	-0.0205988	0.963495	0	0	0	0
ENSG00000066651	TRMT11	protein_coding	Q7Z4G4	-0.795978	4.24143e-08	-0.0560004	0.856142	0	0	1	0
ENSG00000066654	THUMPD1	protein_coding	Q9NXG2	-0.194807	0.300197	-0.156776	0.464666	0	0	0	0
ENSG00000066697	MSANTD3	protein_coding	Q96H12	-0.951664	9.54043e-05	-0.0281308	NA	0	0	0	0
ENSG00000066735	KIF26A	protein_coding	Q9ULI4	0.0152338	0.970109	0.256622	NA	0	1	0	1
ENSG00000066739	ATG2B	protein_coding	Q96BY7	-0.533883	4.4487e-06	0.156952	0.392773	0	0	0	0
ENSG00000066777	ARFGEF1	protein_coding	Q9Y6D6	-0.576872	4.19904e-06	0.246137	0.14541	1	1	0	1
ENSG00000066813	ACSM2B	protein_coding	Q68CK6	NA	NA	NA	NA	0	0	0	0
ENSG00000066827	ZFAT	protein_coding	Q9P243	0.128542	0.753727	-0.0694137	NA	0	0	0	0
ENSG00000066855	MTFR1	protein_coding	Q15390	-0.291588	0.0520759	0.000444992	0.999054	1	0	1	0
ENSG00000066923	STAG3	protein_coding	Q9UJ98	0.874847	0.380392	1.28388	NA	1	0	0	1
ENSG00000066926	FECH	protein_coding	P22830	0.33899	0.0758872	-0.0252729	0.939733	0	0	1	0
ENSG00000066933	MYO9A	protein_coding	B2RTY4	-0.36312	0.00553685	0.0302162	0.910128	1	1	0	1
ENSG00000067048	DDX3Y	protein_coding	O15523	-0.241711	0.888155	0.545165	NA	1	0	0	1
ENSG00000067057	PFKP	protein_coding	Q01813	-0.019455	0.929303	0.0630613	0.781539	1	1	0	1
ENSG00000067064	IDI1	protein_coding	Q13907	-0.461204	3.71091e-05	-0.507423	5.61928e-06	1	0	1	0
ENSG00000067066	SP100	protein_coding	P23497	-0.607794	NA	0.899056	NA	0	0	0	0
ENSG00000067082	KLF6	protein_coding	Q99612	0.265394	0.0333197	-0.125187	0.425029	0	1	0	1
ENSG00000067113	PLPP1	protein_coding	O14494	1.29078	6.15771e-13	0.324779	0.12439	1	1	0	1
ENSG00000067141	NEO1	protein_coding	Q92859	0.386809	0.00316549	0.327739	0.0254194	1	1	0	1
ENSG00000067167	TRAM1	protein_coding	Q15629	0.0284068	0.842267	-0.0561428	0.692497	1	0	0	1
ENSG00000067177	PHKA1	protein_coding	P46020	-0.508352	0.000112883	0.00918481	0.977341	1	1	0	1
ENSG00000067182	TNFRSF1A	protein_coding	P19438	0.104321	0.561538	0.00616764	0.982215	1	1	0	1
ENSG00000067191	CACNB1	protein_coding	Q02641	0.173695	0.705784	0.497387	NA	1	0	0	1
ENSG00000067208	EVI5	protein_coding	O60447	-0.439596	0.00452755	0.11485	0.639181	1	1	0	1
ENSG00000067221	STOML1	protein_coding	Q9UBI4	0.475588	0.0948791	-0.00926327	0.985935	1	0	1	0
ENSG00000067225	PKM	protein_coding	P14618	0.192726	0.134332	-0.214455	0.0809658	1	0	0	1
ENSG00000067248	DHX29	protein_coding	Q7Z478	-0.651718	4.24626e-10	-0.133412	0.394006	0	1	0	1
ENSG00000067334	DNTTIP2	protein_coding	Q5QJE6	-0.254507	0.00543943	-0.564016	9.20564e-10	0	0	0	0
ENSG00000067365	METTL22	protein_coding	Q9BUU2	0.0432852	0.889367	0.407023	0.107202	0	0	0	0
ENSG00000067369	TP53BP1	protein_coding	Q12888	-0.329721	0.000464093	0.0327085	0.8474	0	0	0	0
ENSG00000067445	TRO	protein_coding	Q12816	-0.182844	0.380437	0.0794737	0.779498	0	0	0	0
ENSG00000067533	RRP15	protein_coding	Q9Y3B9	-0.419263	8.92803e-05	-0.0439205	0.843704	0	0	0	0
ENSG00000067560	RHOA	protein_coding	P61586	0.629331	2.75843e-20	-0.153754	0.113213	1	0	0	1
ENSG00000067596	DHX8	protein_coding	Q14562	-0.0562725	0.695521	-0.234405	0.0381098	0	1	0	1
ENSG00000067601	PMS2P4	transcribed_unprocessed_pseudogene	#N/A	0.212462	0.696418	-0.225935	NA	0	0	0	0
ENSG00000067606	PRKCZ	protein_coding	Q05513	0.584425	0.00111134	0.155994	0.514116	1	1	0	1
ENSG00000067646	ZFY	protein_coding	P08048	0.0841767	NA	-1.21324	NA	0	0	0	0
ENSG00000067704	IARS2	protein_coding	Q9NSE4	-0.793099	1.14158e-17	-0.136044	0.305076	0	0	1	0
ENSG00000067715	SYT1	protein_coding	P21579	0.406954	0.136395	0.0411704	0.935693	1	0	0	1
ENSG00000067798	NAV3	protein_coding	Q8IVL0	1.0553	0.52081	0.144247	NA	0	0	0	0
ENSG00000067829	IDH3G	protein_coding	P51553	0.0292496	0.89209	-0.038274	0.87255	0	0	1	0
ENSG00000067836	ROGDI	protein_coding	Q9GZN7	0.651991	0.0185721	0.12513	0.759325	0	0	0	0
ENSG00000067840	PDZD4	protein_coding	Q76G19	0.403916	0.386808	0.367106	NA	0	0	0	0
ENSG00000067842	ATP2B3	protein_coding	Q16720	1.40613	NA	0.350514	NA	1	1	0	1
ENSG00000067900	ROCK1	protein_coding	Q13464	-0.527592	3.76725e-08	0.00439764	0.98428	1	0	0	1
ENSG00000067955	CBFB	protein_coding	Q13951	-0.265461	0.0699278	-0.241843	0.157746	1	0	0	1
ENSG00000067992	PDK3	protein_coding	Q15120	-0.166585	0.347591	0.0277724	0.920884	0	0	1	0
ENSG00000068001	HYAL2	protein_coding	Q12891	0.63392	0.0159716	0.320993	0.305076	1	1	0	1
ENSG00000068024	HDAC4	protein_coding	P56524	0.316511	0.217461	0.21518	0.496233	0	0	0	0
ENSG00000068028	RASSF1	protein_coding	Q9NS23	0.318926	0.0145309	-0.248625	0.0844966	0	0	0	0
ENSG00000068078	FGFR3	protein_coding	P22607	0.580775	0.00238061	0.43646	0.0541029	1	1	0	1
ENSG00000068079	IFI35	protein_coding	P80217	0.690274	0.280933	-0.16687	NA	0	0	0	0
ENSG00000068097	HEATR6	protein_coding	Q6AI08	0.842854	2.52276e-16	-0.02975	0.872898	0	0	0	0
ENSG00000068120	COASY	protein_coding	Q13057	0.35065	0.00219661	0.158938	0.279126	0	1	1	1
ENSG00000068137	PLEKHH3	protein_coding	Q7Z736	0.619402	0.000124115	0.0778399	0.760175	1	1	0	1
ENSG00000068305	MEF2A	protein_coding	Q02078	-0.385739	0.00206257	-0.277917	0.0962828	0	0	0	0
ENSG00000068308	OTUD5	protein_coding	Q96G74	0.511268	5.93108e-06	0.192316	0.194325	0	0	0	0
ENSG00000068323	TFE3	protein_coding	P19532	0.543561	3.44375e-05	0.132528	0.451744	0	0	0	0
ENSG00000068354	TBC1D25	protein_coding	Q3MII6	0.212562	0.278733	0.245242	0.280543	1	0	0	1
ENSG00000068366	ACSL4	protein_coding	O60488	-0.608676	2.69004e-07	-0.155147	0.365192	1	1	1	1
ENSG00000068383	INPP5A	protein_coding	Q14642	0.868665	8.72866e-08	-0.0612982	0.837486	1	1	0	1
ENSG00000068394	GPKOW	protein_coding	Q92917	0.0638845	0.72406	-0.273655	0.0624812	0	0	0	0
ENSG00000068400	GRIPAP1	protein_coding	Q4V328	-0.0626277	0.721586	0.121514	0.489549	0	1	0	1
ENSG00000068438	FTSJ1	protein_coding	Q9UET6	0.175938	0.172979	-0.0208074	0.922021	0	0	0	0
ENSG00000068489	PRR11	protein_coding	Q96HE9	0.121245	0.603585	-0.0794024	0.781675	1	1	0	1
ENSG00000068615	REEP1	protein_coding	Q9H902	-0.162037	0.638301	0.00719301	NA	1	0	0	1
ENSG00000068650	ATP11A	protein_coding	P98196	-0.39294	0.0506484	0.155904	0.598435	1	1	0	1
ENSG00000068654	POLR1A	protein_coding	O95602	0.0923342	0.405994	0.160901	0.159428	0	0	0	0
ENSG00000068697	LAPTM4A	protein_coding	Q15012	0.345437	0.000699526	0.0719666	0.620759	1	1	0	1
ENSG00000068724	TTC7A	protein_coding	Q9ULT0	0.261003	0.503903	0.305354	NA	1	0	0	1
ENSG00000068745	IP6K2	protein_coding	Q9UHH9	-0.170406	0.0819488	-0.582905	5.32875e-11	0	1	0	1
ENSG00000068781	STON1-GTF2A1L	protein_coding	Q53S48	-0.983282	NA	NA	NA	1	0	0	1
ENSG00000068784	SRBD1	protein_coding	Q8N5C6	-0.46537	5.73458e-05	-0.113338	0.460038	0	0	0	0
ENSG00000068796	KIF2A	protein_coding	O00139	-0.614155	2.4659e-09	-0.248519	0.0975298	1	0	0	1
ENSG00000068831	RASGRP2	protein_coding	Q7LDG7	0.630964	0.334246	0.307361	NA	1	0	0	1
ENSG00000068878	PSME4	protein_coding	Q14997	-0.501304	9.74401e-07	0.0411723	0.828442	0	0	0	0
ENSG00000068885	IFT80	protein_coding	Q9P2H3	-0.355481	0.0688289	0.00387902	0.994171	0	0	0	0
ENSG00000068903	SIRT2	protein_coding	Q8IXJ6	NA	NA	NA	NA	1	0	0	1
ENSG00000068912	ERLEC1	protein_coding	Q96DZ1	-0.484529	0.000466334	0.141544	0.514242	1	1	0	1
ENSG00000068971	PPP2R5B	protein_coding	Q15173	0.403904	0.0574065	0.553748	0.0149371	0	0	0	0
ENSG00000068976	PYGM	protein_coding	P11217	0.0381584	0.954802	0.189611	NA	0	0	0	0
ENSG00000068985	PAGE1	protein_coding	O75459	-0.983282	NA	NA	NA	0	0	0	0
ENSG00000069011	PITX1	protein_coding	P78337	0.110856	0.620113	0.224764	0.299073	0	0	0	0
ENSG00000069018	TRPC7	protein_coding	Q9HCX4	-2.43658	NA	-1.02551	NA	1	0	0	1
ENSG00000069020	MAST4	protein_coding	O15021	-0.321442	0.342471	-0.0730176	NA	0	0	0	0
ENSG00000069122	ADGRF5	protein_coding	Q8IZF2	-1.6354	NA	-1.44999	NA	1	0	0	1
ENSG00000069188	SDK2	protein_coding	Q58EX2	0.120346	0.644619	0.417749	0.0810906	1	0	0	1
ENSG00000069206	ADAM7	protein_coding	Q9H2U9	NA	NA	NA	NA	1	1	0	1
ENSG00000069248	NUP133	protein_coding	Q8WUM0	-0.403081	3.83049e-07	-0.0693503	0.569979	1	0	0	1
ENSG00000069275	NUCKS1	protein_coding	Q9H1E3	-0.0740651	0.560065	-0.290987	0.00939808	0	0	0	0
ENSG00000069329	VPS35	protein_coding	Q96QK1	-0.123049	0.269524	-0.152029	0.189392	1	1	0	1
ENSG00000069345	DNAJA2	protein_coding	O60884	-0.382679	8.83211e-06	-0.246606	0.0218946	1	0	0	1
ENSG00000069399	BCL3	protein_coding	P20749	0.0951946	0.953262	-0.354818	NA	1	1	0	1
ENSG00000069424	KCNAB2	protein_coding	Q13303	0.158224	0.833216	0.449262	NA	1	0	0	1
ENSG00000069431	ABCC9	protein_coding	O60706	-0.120863	0.93102	0.719827	NA	1	0	0	1
ENSG00000069482	GAL	protein_coding	P22466	0.631607	4.13542e-06	0.0367737	0.879179	1	1	0	1
ENSG00000069493	CLEC2D	protein_coding	Q9UHP7	-1.25158	0.0894872	-0.288546	NA	1	1	0	1
ENSG00000069509	FUNDC1	protein_coding	Q8IVP5	-0.238712	0.150629	-0.102372	0.651133	0	0	1	0
ENSG00000069535	MAOB	protein_coding	P27338	0.130002	0.944193	-0.542325	NA	1	0	1	0
ENSG00000069667	RORA	protein_coding	P35398	-0.647458	0.0512463	-0.189635	NA	0	0	0	0
ENSG00000069696	DRD4	protein_coding	P21917	NA	NA	NA	NA	1	0	0	1
ENSG00000069702	TGFBR3	protein_coding	Q03167	0.0951843	0.719682	0.285878	0.250375	1	1	0	1
ENSG00000069712	KIAA1107	protein_coding	Q9UPP5	NA	NA	NA	NA	0	0	0	0
ENSG00000069764	PLA2G10	protein_coding	O15496	NA	NA	NA	NA	1	1	0	1
ENSG00000069812	HES2	protein_coding	Q9Y543	1.10013	NA	0.600587	NA	0	0	0	0
ENSG00000069849	ATP1B3	protein_coding	P54709	0.208393	0.104202	0.0632219	0.737625	1	1	0	1
ENSG00000069869	NEDD4	protein_coding	P46934	-0.0171224	0.953445	-0.15628	0.555812	1	0	0	1
ENSG00000069943	PIGB	protein_coding	Q92521	0.100077	0.881218	0.459442	NA	1	1	0	1
ENSG00000069956	MAPK6	protein_coding	Q16659	0.819543	2.44933e-08	0.233813	0.204007	0	0	0	0
ENSG00000069966	GNB5	protein_coding	O14775	0.691522	0.000655943	-0.104921	0.723134	1	0	0	1
ENSG00000069974	RAB27A	protein_coding	P51159	-0.292156	0.607059	-0.044839	NA	1	0	0	1
ENSG00000069998	CECR5	protein_coding	Q9BXW7	0.44873	3.15088e-05	0.0665835	0.686181	0	1	1	1
ENSG00000070010	UFD1L	protein_coding	#N/A	0.223006	0.0512811	-0.176557	0.198581	0	1	0	1
ENSG00000070018	LRP6	protein_coding	O75581	NA	NA	NA	NA	1	0	0	1
ENSG00000070019	GUCY2C	protein_coding	P25092	-1.11916	0.444546	1.94951	NA	1	1	0	1
ENSG00000070031	SCT	protein_coding	P09683	NA	NA	NA	NA	1	1	0	1
ENSG00000070047	PHRF1	protein_coding	Q9P1Y6	-0.155539	0.882122	0.620569	NA	1	0	0	1
ENSG00000070061	IKBKAP	protein_coding	#N/A	-0.0957636	0.386808	0.0808534	0.532815	0	0	0	0
ENSG00000070081	NUCB2	protein_coding	P80303	0.032525	0.825039	0.214707	0.0224194	1	1	1	1
ENSG00000070087	PFN2	protein_coding	P35080	-0.0741067	0.554829	-0.12713	0.281931	0	0	0	0
ENSG00000070159	PTPN3	protein_coding	P26045	0.252593	0.232033	0.0728004	0.801452	1	0	0	1
ENSG00000070182	SPTB	protein_coding	P11277	-0.0630187	0.864514	0.162553	0.660217	1	1	0	1
ENSG00000070190	DAPP1	protein_coding	Q9UN19	-2.46854	NA	-1.80916	NA	1	0	0	1
ENSG00000070193	FGF10	protein_coding	O15520	NA	NA	NA	NA	1	1	0	1
ENSG00000070214	SLC44A1	protein_coding	Q8WWI5	-0.0713791	0.810612	0.00413648	0.993158	1	0	0	1
ENSG00000070269	TMEM260	protein_coding	Q9NX78	-0.100913	0.782103	0.11025	NA	1	0	0	1
ENSG00000070366	SMG6	protein_coding	Q86US8	0.0672862	0.702846	0.0494504	0.815704	0	1	0	1
ENSG00000070367	EXOC5	protein_coding	O00471	-0.188119	0.153402	0.0713199	0.701822	0	0	0	0
ENSG00000070371	CLTCL1	protein_coding	P53675	-0.13252	0.386808	0.0377131	0.869411	1	1	0	1
ENSG00000070388	FGF22	protein_coding	Q9HCT0	-0.609829	0.680367	0.879671	NA	1	1	0	1
ENSG00000070404	FSTL3	protein_coding	O95633	-0.0665149	0.931628	0.419182	NA	1	1	0	1
ENSG00000070413	DGCR2	protein_coding	P98153	0.339841	0.00412507	0.220746	0.117029	1	0	0	1
ENSG00000070423	RNF126	protein_coding	Q9BV68	0.603578	1.13778e-05	0.201197	0.250195	0	0	0	0
ENSG00000070444	MNT	protein_coding	Q99583	0.0933718	0.736448	0.253599	0.340299	0	0	0	0
ENSG00000070476	ZXDC	protein_coding	Q2QGD7	0.372839	0.00132477	0.284559	0.0312358	0	1	0	1
ENSG00000070495	JMJD6	protein_coding	Q6NYC1	0.287115	0.0159887	-0.0912384	0.569295	1	0	0	1
ENSG00000070501	POLB	protein_coding	P06746	-0.157524	0.463028	-0.0374908	0.898547	0	1	0	1
ENSG00000070526	ST6GALNAC1	protein_coding	Q9NSC7	-0.8821	0.567601	0.513622	NA	1	0	0	1
ENSG00000070540	WIPI1	protein_coding	Q5MNZ9	0.618868	0.0146096	0.0931412	0.800207	1	0	0	1
ENSG00000070601	FRMPD1	protein_coding	Q5SYB0	-0.318695	0.768557	0.0251079	NA	1	0	0	1
ENSG00000070610	GBA2	protein_coding	Q9HCG7	-0.192447	0.223875	0.412096	0.0294193	1	1	0	1
ENSG00000070614	NDST1	protein_coding	P52848	0.054592	0.799432	0.372052	0.0259061	1	0	0	1
ENSG00000070669	ASNS	protein_coding	P08243	-0.366974	2.6205e-05	-0.297631	0.00480757	0	0	0	0
ENSG00000070718	AP3M2	protein_coding	P53677	0.365067	0.0165257	-0.173693	0.385347	1	0	0	1
ENSG00000070729	CNGB1	protein_coding	Q14028	-0.983282	NA	NA	NA	1	1	0	1
ENSG00000070731	ST6GALNAC2	protein_coding	Q9UJ37	-0.325465	0.793585	-0.149032	NA	1	1	0	1
ENSG00000070748	CHAT	protein_coding	P28329	NA	NA	NA	NA	0	0	0	0
ENSG00000070756	PABPC1	protein_coding	P11940	0.0656016	0.517662	-0.0690246	0.5308	1	0	0	1
ENSG00000070759	TESK2	protein_coding	Q96S53	-0.478321	0.331865	-0.0944931	NA	0	0	0	0
ENSG00000070761	CFAP20	protein_coding	Q9Y6A4	0.146428	0.347332	-0.383797	0.00428567	0	0	0	0
ENSG00000070770	CSNK2A2	protein_coding	P19784	-0.128705	0.223216	-0.183688	0.0951228	1	1	0	1
ENSG00000070778	PTPN21	protein_coding	Q16825	-0.151827	0.712612	0.537012	NA	0	1	0	1
ENSG00000070785	EIF2B3	protein_coding	Q9NR50	-0.195371	0.0800675	-0.17812	0.14302	0	1	0	1
ENSG00000070808	CAMK2A	protein_coding	Q9UQM7	-0.983282	NA	-1.88693	NA	1	1	0	1
ENSG00000070814	TCOF1	protein_coding	Q13428	0.0153715	0.937459	0.015491	0.946756	0	0	0	0
ENSG00000070831	CDC42	protein_coding	P60953	-0.208678	0.172478	-0.351126	0.0231986	1	0	0	1
ENSG00000070882	OSBPL3	protein_coding	Q9H4L5	-0.486237	0.00849957	-0.0895838	0.782712	1	0	0	1
ENSG00000070886	EPHA8	protein_coding	P29322	0.743673	0.177072	0.395513	NA	1	1	0	1
ENSG00000070915	SLC12A3	protein_coding	P55017	-0.0356975	NA	2.33427	NA	1	0	0	1
ENSG00000070950	RAD18	protein_coding	Q9NS91	0.159111	0.293817	-0.104892	0.554976	0	0	0	0
ENSG00000070961	ATP2B1	protein_coding	P20020	0.01673	0.919499	0.34896	0.00749388	1	1	0	1
ENSG00000070985	TRPM5	protein_coding	Q9NZQ8	1.16874	NA	2.1049	NA	1	0	0	1
ENSG00000071051	NCK2	protein_coding	O43639	-0.70997	0.010888	-0.447762	NA	1	0	0	1
ENSG00000071054	MAP4K4	protein_coding	O95819	-0.10737	0.413204	0.0023816	0.993435	0	0	0	0
ENSG00000071073	MGAT4A	protein_coding	Q9UM21	-0.596035	0.0120944	-0.0114642	NA	1	1	0	1
ENSG00000071082	RPL31	protein_coding	P62899	1.22731	5.81343e-71	-0.172141	0.056347	1	0	0	1
ENSG00000071127	WDR1	protein_coding	O75083	0.182105	0.10656	-0.139271	0.305733	1	1	0	1
ENSG00000071189	SNX13	protein_coding	Q9Y5W8	0.0312142	0.910053	0.183356	0.438926	0	0	0	0
ENSG00000071203	MS4A12	protein_coding	Q9NXJ0	NA	NA	NA	NA	1	0	0	1
ENSG00000071205	ARHGAP10	protein_coding	A1A4S6	-0.229873	0.309592	-0.0392699	0.911924	1	0	0	1
ENSG00000071242	RPS6KA2	protein_coding	Q15349	0.543509	0.0105264	0.522885	0.026516	0	0	0	0
ENSG00000071243	ING3	protein_coding	Q9NXR8	-0.115432	0.555729	-0.152051	0.462418	0	0	0	0
ENSG00000071246	VASH1	protein_coding	Q7L8A9	-0.253449	0.588275	0.00343847	NA	1	1	0	1
ENSG00000071282	LMCD1	protein_coding	Q9NZU5	0.958316	0.00108903	0.027738	NA	0	1	0	1
ENSG00000071462	WBSCR22	protein_coding	#N/A	0.560786	1.23145e-08	0.00635373	0.980251	0	0	0	0
ENSG00000071537	SEL1L	protein_coding	Q9UBV2	0.117907	0.316735	0.429798	4.49398e-06	1	1	0	1
ENSG00000071539	TRIP13	protein_coding	Q15645	-0.421545	0.000618882	-0.15847	0.33297	0	0	0	0
ENSG00000071553	ATP6AP1	protein_coding	Q15904	0.96743	5.54867e-26	0.263483	0.021459	1	1	0	1
ENSG00000071564	TCF3	protein_coding	P15923	0.437938	0.00092345	0.302421	0.0557167	0	0	0	0
ENSG00000071575	TRIB2	protein_coding	Q92519	0.352218	0.480718	0.440411	NA	0	0	0	0
ENSG00000071626	DAZAP1	protein_coding	Q96EP5	-0.169605	0.108648	-0.051318	0.718729	0	0	0	0
ENSG00000071655	MBD3	protein_coding	O95983	1.18229	8.66654e-27	0.533456	1.20937e-05	0	0	0	0
ENSG00000071677	PRLH	protein_coding	P81277	NA	NA	NA	NA	1	1	0	1
ENSG00000071794	HLTF	protein_coding	Q14527	-0.613302	1.13211e-11	-0.171876	0.154841	1	0	0	1
ENSG00000071859	FAM50A	protein_coding	Q14320	0.390212	0.000680264	-0.0408409	0.831157	0	0	0	0
ENSG00000071889	FAM3A	protein_coding	P98173	0.927799	1.12962e-12	0.440693	0.00218141	1	0	0	1
ENSG00000071894	CPSF1	protein_coding	Q10570	0.923074	2.88965e-22	0.223937	0.0777463	0	0	0	0
ENSG00000071909	MYO3B	protein_coding	Q8WXR4	0.737084	NA	-0.233579	NA	0	0	0	0
ENSG00000071967	CYBRD1	protein_coding	Q53TN4	-0.104739	0.870417	0.0320244	NA	1	1	0	1
ENSG00000071991	CDH19	protein_coding	Q9H159	NA	NA	NA	NA	1	1	0	1
ENSG00000071994	PDCD2	protein_coding	Q16342	0.577414	6.55508e-05	-0.104013	0.612242	0	0	0	0
ENSG00000072041	SLC6A15	protein_coding	Q9H2J7	0.0935128	0.480632	0.303638	0.0135498	1	1	0	1
ENSG00000072042	RDH11	protein_coding	Q8TC12	0.43363	7.95632e-05	0.234856	0.0855727	1	1	1	1
ENSG00000072062	PRKACA	protein_coding	P17612	0.433313	2.1185e-06	-0.196675	0.0887826	1	0	0	1
ENSG00000072071	ADGRL1	protein_coding	O94910	0.730121	2.52672e-07	0.164484	0.334726	1	0	0	1
ENSG00000072080	SPP2	protein_coding	Q13103	-1.91419	NA	-0.0637278	NA	1	1	0	1
ENSG00000072110	ACTN1	protein_coding	P12814	0.494067	1.57736e-07	-0.0898783	0.49841	1	1	0	1
ENSG00000072121	ZFYVE26	protein_coding	Q68DK2	-0.25149	0.0781178	0.438585	0.00593404	1	0	0	1
ENSG00000072133	RPS6KA6	protein_coding	Q9UK32	-0.720317	0.0259304	-0.111787	NA	0	0	0	0
ENSG00000072134	EPN2	protein_coding	O95208	0.531883	3.50116e-05	0.0377734	0.861817	0	1	0	1
ENSG00000072135	PTPN18	protein_coding	Q99952	0.468261	0.0334389	-0.0720999	0.827028	0	0	0	0
ENSG00000072163	LIMS2	protein_coding	Q7Z4I7	1.31514	0.210357	0.836633	NA	1	0	0	1
ENSG00000072182	ASIC4	protein_coding	Q96FT7	0.0657645	0.964647	0.540722	NA	1	0	0	1
ENSG00000072195	SPEG	protein_coding	Q15772	0.450897	0.254264	0.316158	NA	0	1	0	1
ENSG00000072201	LNX1	protein_coding	Q8TBB1	-1.94744	NA	NA	NA	0	1	0	1
ENSG00000072210	ALDH3A2	protein_coding	P51648	-0.0498653	0.78707	0.0449	0.826292	1	0	1	0
ENSG00000072274	TFRC	protein_coding	P02786	-0.287487	0.0004633	0.256589	0.00533232	1	1	0	1
ENSG00000072310	SREBF1	protein_coding	P36956	0.368969	0.00772694	0.296811	0.0900715	1	1	0	1
ENSG00000072315	TRPC5	protein_coding	Q9UL62	-0.0349338	NA	1.63839	NA	1	0	0	1
ENSG00000072364	AFF4	protein_coding	Q9UHB7	-0.411254	0.000128648	-0.197488	0.121991	0	0	0	0
ENSG00000072401	UBE2D1	protein_coding	P51668	-0.0840131	0.774201	-0.085045	0.799713	0	1	0	1
ENSG00000072415	MPP5	protein_coding	Q8N3R9	-0.772743	5.49215e-11	-0.455379	0.00050588	1	1	0	1
ENSG00000072422	RHOBTB1	protein_coding	O94844	-0.129028	0.759204	0.321661	NA	1	0	0	1
ENSG00000072501	SMC1A	protein_coding	Q14683	-0.177786	0.141279	-0.0962484	0.56446	0	0	0	0
ENSG00000072506	HSD17B10	protein_coding	Q99714	0.817609	1.29799e-22	-0.343712	0.00029989	1	0	1	0
ENSG00000072518	MARK2	protein_coding	Q7KZI7	0.0845103	0.629031	0.0942848	0.627936	1	1	0	1
ENSG00000072571	HMMR	protein_coding	O75330	-0.421092	6.92014e-05	-0.157194	0.250195	1	0	0	1
ENSG00000072609	CHFR	protein_coding	Q96EP1	0.445861	0.00292961	0.311675	0.0764749	0	0	0	0
ENSG00000072657	TRHDE	protein_coding	Q9UKU6	0.878673	NA	0.974359	NA	1	0	0	1
ENSG00000072682	P4HA2	protein_coding	O15460	0.798991	8.51032e-08	0.159492	0.391642	1	1	0	1
ENSG00000072694	FCGR2B	protein_coding	P31994	2.42844	NA	1.4229	NA	1	0	0	1
ENSG00000072736	NFATC3	protein_coding	Q12968	-0.149057	0.440699	-0.0945002	0.692425	0	0	0	0
ENSG00000072756	TRNT1	protein_coding	Q96Q11	-0.192719	0.324887	0.0451113	0.876142	0	0	1	0
ENSG00000072778	ACADVL	protein_coding	P49748	0.219978	0.0842692	-0.141267	0.365472	0	0	1	0
ENSG00000072786	STK10	protein_coding	O94804	0.528561	0.000992315	0.0404389	0.893357	1	0	0	1
ENSG00000072803	FBXW11	protein_coding	Q9UKB1	-0.300173	0.00558854	-0.232222	0.0889914	0	1	0	1
ENSG00000072818	ACAP1	protein_coding	Q15027	0.0466102	0.961371	0.132947	NA	1	1	0	1
ENSG00000072832	CRMP1	protein_coding	Q14194	1.13599	0.0060762	0.265797	NA	0	0	0	0
ENSG00000072840	EVC	protein_coding	P57679	0.21846	0.575522	0.648308	NA	1	0	0	1
ENSG00000072849	DERL2	protein_coding	Q9GZP9	-0.397379	0.000380128	-0.0798735	0.641984	1	1	0	1
ENSG00000072858	SIDT1	protein_coding	Q9NXL6	0.442723	0.596902	0.727442	NA	1	0	0	1
ENSG00000072864	NDE1	protein_coding	Q9NXR1	-0.0214979	NA	0.898042	NA	1	0	0	1
ENSG00000072952	MRVI1	protein_coding	Q9Y6F6	-3.48486	NA	-1.02551	NA	1	0	0	1
ENSG00000072954	TMEM38A	protein_coding	Q9H6F2	0.433062	0.479596	-0.193449	NA	1	0	0	1
ENSG00000072958	AP1M1	protein_coding	Q9BXS5	0.184549	0.20543	-0.284819	0.0392091	1	0	0	1
ENSG00000073008	PVR	protein_coding	P15151	0.352488	0.00686429	0.190898	0.240809	1	1	0	1
ENSG00000073050	XRCC1	protein_coding	P18887	-0.0365788	0.884608	-0.119053	0.630821	0	0	0	0
ENSG00000073060	SCARB1	protein_coding	Q8WTV0	0.472874	5.65436e-06	0.308795	0.0130809	1	1	0	1
ENSG00000073067	CYP2W1	protein_coding	Q8TAV3	-0.932728	NA	-1.20192	NA	1	1	0	1
ENSG00000073111	MCM2	protein_coding	P49736	0.0419178	0.817999	-0.325915	0.00356853	0	0	0	0
ENSG00000073146	MOV10L1	protein_coding	Q9BXT6	-1.9142	NA	-2.30416	NA	0	0	0	0
ENSG00000073150	PANX2	protein_coding	Q96RD6	0.747703	0.258183	0.132856	NA	1	1	0	1
ENSG00000073169	SELENOO	protein_coding	Q9BVL4	0.703912	4.84605e-05	0.38098	0.0599322	0	1	1	1
ENSG00000073282	TP63	protein_coding	Q9H3D4	0.940271	NA	0.898042	NA	1	1	0	1
ENSG00000073331	ALPK1	protein_coding	Q96QP1	-0.356169	0.390428	0.140382	NA	0	0	0	0
ENSG00000073350	LLGL2	protein_coding	Q6P1M3	0.390839	0.22115	-0.113515	NA	1	1	0	1
ENSG00000073417	PDE8A	protein_coding	O60658	-0.20897	0.33438	0.362271	0.134351	0	1	0	1
ENSG00000073464	CLCN4	protein_coding	P51793	-0.0652955	NA	1.42142	NA	1	1	0	1
ENSG00000073536	NLE1	protein_coding	Q9NVX2	0.570097	2.43722e-07	0.028173	0.896824	0	0	0	0
ENSG00000073578	SDHA	protein_coding	P31040	0.0806843	0.62346	0.0138804	0.951487	0	0	1	0
ENSG00000073584	SMARCE1	protein_coding	Q969G3	-0.330522	0.247476	-0.0946309	0.82757	0	0	0	0
ENSG00000073598	FNDC8	protein_coding	Q8TC99	3.49741	NA	-0.570336	NA	0	0	0	0
ENSG00000073605	GSDMB	protein_coding	Q8TAX9	-0.684196	0.1907	-0.252341	NA	1	0	0	1
ENSG00000073614	KDM5A	protein_coding	P29375	0.0836031	0.612052	-0.145653	0.389984	0	0	0	0
ENSG00000073670	ADAM11	protein_coding	O75078	0.497328	0.185546	0.192204	NA	1	0	0	1
ENSG00000073711	PPP2R3A	protein_coding	Q06190	-0.925	0.00261234	-0.218734	NA	0	1	0	1
ENSG00000073712	FERMT2	protein_coding	Q96AC1	-0.340115	0.00035769	-0.144218	0.270666	0	0	0	0
ENSG00000073734	ABCB11	protein_coding	O95342	NA	NA	NA	NA	1	1	0	1
ENSG00000073737	DHRS9	protein_coding	Q9BPW9	-0.751954	NA	-0.349539	NA	1	1	0	1
ENSG00000073754	CD5L	protein_coding	O43866	NA	NA	NA	NA	1	1	0	1
ENSG00000073756	PTGS2	protein_coding	P35354	0.102597	0.842267	0.0733213	NA	1	1	0	1
ENSG00000073792	IGF2BP2	protein_coding	Q9Y6M1	-0.154564	0.41616	-0.117248	0.604293	0	0	0	0
ENSG00000073803	MAP3K13	protein_coding	O43283	-0.955548	1.29816e-12	-0.246691	0.222467	1	0	0	1
ENSG00000073849	ST6GAL1	protein_coding	P15907	0.256959	0.614286	-0.204127	NA	1	1	0	1
ENSG00000073861	TBX21	protein_coding	Q9UL17	1.24256	NA	0.35895	NA	0	0	0	0
ENSG00000073905	VDAC1P1	processed_pseudogene	#N/A	-0.699965	0.00204184	-0.486863	0.10951	0	0	1	0
ENSG00000073910	FRY	protein_coding	Q5TBA9	-0.707051	0.141442	-0.436252	NA	0	0	0	0
ENSG00000073921	PICALM	protein_coding	Q13492	-0.0307961	0.859414	-0.29418	0.0218946	1	1	0	1
ENSG00000073969	NSF	protein_coding	P46459	0.940271	NA	-1.52509	NA	1	0	0	1
ENSG00000074047	GLI2	protein_coding	P10070	0.583408	0.122491	0.696871	NA	1	0	0	1
ENSG00000074054	CLASP1	protein_coding	Q7Z460	0.0768247	0.522082	0.0376523	0.815169	1	0	0	1
ENSG00000074071	MRPS34	protein_coding	P82930	0.714453	3.71839e-16	0.0274053	0.866309	0	0	1	0
ENSG00000074181	NOTCH3	protein_coding	Q9UM47	0.550299	0.00209634	0.131317	0.605441	1	1	0	1
ENSG00000074201	CLNS1A	protein_coding	P54105	0.120397	0.248411	-0.171038	0.126682	1	0	0	1
ENSG00000074211	PPP2R2C	protein_coding	Q9Y2T4	-0.121551	0.912382	-0.0331292	NA	0	0	0	0
ENSG00000074219	TEAD2	protein_coding	Q15562	0.0309911	0.931858	-0.115407	0.724427	0	0	0	0
ENSG00000074266	EED	protein_coding	O75530	0.0233785	0.896395	-0.193815	0.144222	0	0	0	0
ENSG00000074276	CDHR2	protein_coding	Q9BYE9	0.790036	0.388543	0.408744	NA	0	0	0	0
ENSG00000074317	SNCB	protein_coding	Q16143	-0.197109	0.746036	-0.492998	NA	0	0	0	0
ENSG00000074319	TSG101	protein_coding	Q99816	0.0970565	0.455717	-0.0801387	0.566063	1	1	0	1
ENSG00000074356	NCBP3	protein_coding	Q53F19	0.163643	0.290366	0.0987222	0.592864	0	0	0	0
ENSG00000074370	ATP2A3	protein_coding	Q93084	0.800913	0.00110582	-0.15067	0.648457	1	0	0	1
ENSG00000074410	CA12	protein_coding	O43570	-0.511274	0.598637	-0.269197	NA	1	1	0	1
ENSG00000074416	MGLL	protein_coding	Q99685	0.472896	0.608963	0.126942	NA	1	0	0	1
ENSG00000074527	NTN4	protein_coding	Q9HB63	0.746288	0.338883	0.443814	NA	1	1	0	1
ENSG00000074582	BCS1L	protein_coding	Q9Y276	-0.0343618	0.855934	0.0225072	0.923803	1	0	1	0
ENSG00000074590	NUAK1	protein_coding	O60285	-0.470107	0.111485	0.247674	NA	0	0	0	0
ENSG00000074603	DPP8	protein_coding	Q6V1X1	-0.0344254	0.878276	0.223033	0.281312	0	0	0	0
ENSG00000074621	SLC24A1	protein_coding	O60721	-0.330446	0.253655	0.189462	NA	1	0	0	1
ENSG00000074657	ZNF532	protein_coding	Q9HCE3	0.335431	0.419188	0.357331	NA	0	1	0	1
ENSG00000074660	SCARF1	protein_coding	Q14162	NA	NA	NA	NA	1	1	0	1
ENSG00000074695	LMAN1	protein_coding	P49257	0.0804809	0.441583	0.167817	0.0803403	1	0	0	1
ENSG00000074696	HACD3	protein_coding	Q9P035	0.553353	2.26707e-09	0.215244	0.074917	1	1	0	1
ENSG00000074706	IPCEF1	protein_coding	Q8WWN9	-0.0375232	0.980363	0.516341	NA	1	1	0	1
ENSG00000074755	ZZEF1	protein_coding	O43149	-0.19638	0.0818735	0.333577	0.0053486	0	0	0	0
ENSG00000074771	NOX3	protein_coding	Q9HBY0	NA	NA	-1.02551	NA	1	1	0	1
ENSG00000074800	ENO1	protein_coding	P06733	0.697454	4.99266e-24	-0.43769	5.0189e-06	1	1	0	1
ENSG00000074803	SLC12A1	protein_coding	Q13621	0.940271	NA	-0.0637279	NA	1	1	0	1
ENSG00000074842	MYDGF	protein_coding	Q969H8	0.634121	1.78506e-10	0.188303	0.16399	1	1	0	1
ENSG00000074855	ANO8	protein_coding	Q9HCE9	0.72131	0.000190779	-0.00287464	0.995197	1	0	0	1
ENSG00000074935	TUBE1	protein_coding	Q9UJT0	0.107403	0.581498	-0.0403348	0.867457	0	0	0	0
ENSG00000074964	ARHGEF10L	protein_coding	Q9HCE6	0.43777	0.279896	0.578078	NA	0	1	0	1
ENSG00000074966	TXK	protein_coding	P42681	-1.0342	NA	1.4229	NA	1	1	0	1
ENSG00000075035	WSCD2	protein_coding	Q2TBF2	0.940271	NA	0.898042	NA	1	1	0	1
ENSG00000075043	KCNQ2	protein_coding	O43526	0.517348	0.454865	0.784802	NA	1	1	0	1
ENSG00000075073	TACR2	protein_coding	P21452	0.939908	NA	1.8705	NA	1	1	0	1
ENSG00000075089	ACTR6	protein_coding	Q9GZN1	-0.212	0.19978	0.0225916	0.935693	0	1	0	1
ENSG00000075131	TIPIN	protein_coding	Q9BVW5	-0.533594	1.18699e-08	-0.241281	0.0378144	0	1	0	1
ENSG00000075142	SRI	protein_coding	P30626	0.524985	2.64719e-06	-0.074765	0.653015	1	0	0	1
ENSG00000075151	EIF4G3	protein_coding	O43432	-0.17822	0.0757391	0.0674693	0.65902	0	0	0	0
ENSG00000075188	NUP37	protein_coding	Q8NFH4	-0.597905	5.02475e-09	-0.248865	0.0681183	0	0	0	0
ENSG00000075213	SEMA3A	protein_coding	Q14563	0.707714	0.0169397	0.432332	NA	1	1	0	1
ENSG00000075218	GTSE1	protein_coding	Q9NYZ3	0.376575	0.000700815	0.0417569	0.827675	1	1	0	1
ENSG00000075223	SEMA3C	protein_coding	Q99985	0.277787	0.0557095	0.134925	0.391194	1	1	0	1
ENSG00000075234	TTC38	protein_coding	Q5R3I4	-0.0189589	0.953031	-0.199465	0.442418	0	0	0	0
ENSG00000075239	ACAT1	protein_coding	P24752	-0.682428	8.42594e-11	-0.437526	0.000121875	0	0	1	0
ENSG00000075240	GRAMD4	protein_coding	Q6IC98	0.0958108	0.791837	0.0692904	0.866406	1	0	0	1
ENSG00000075275	CELSR1	protein_coding	Q9NYQ6	0.159846	0.511823	0.220357	0.405689	1	1	0	1
ENSG00000075290	WNT8B	protein_coding	Q93098	0.110742	NA	0.780692	NA	1	1	0	1
ENSG00000075292	ZNF638	protein_coding	Q14966	-0.672469	3.49545e-13	-0.017925	0.929638	0	1	0	1
ENSG00000075303	SLC25A40	protein_coding	Q8TBP6	-0.276837	0.225027	0.241443	0.397367	1	0	1	0
ENSG00000075336	TIMM21	protein_coding	Q9BVV7	0.34094	0.0606251	0.139509	0.5308	1	0	1	0
ENSG00000075340	ADD2	protein_coding	P35612	-0.335851	0.0062796	-0.152546	0.369172	1	1	0	1
ENSG00000075388	FGF4	protein_coding	P08620	NA	NA	-1.94313	NA	1	1	0	1
ENSG00000075391	RASAL2	protein_coding	Q9UJF2	0.0307922	0.904993	0.290599	0.152309	0	1	0	1
ENSG00000075399	VPS9D1	protein_coding	Q9Y2B5	-0.350408	0.515128	-0.0395762	NA	0	0	0	0
ENSG00000075407	ZNF37A	protein_coding	P17032	-0.715837	0.0155366	0.19435	NA	0	1	0	1
ENSG00000075413	MARK3	protein_coding	P27448	-0.518703	1.71611e-06	0.0581765	0.769948	1	0	0	1
ENSG00000075415	SLC25A3	protein_coding	Q00325	-0.061183	0.663255	-0.254715	0.025281	1	0	1	0
ENSG00000075420	FNDC3B	protein_coding	Q53EP0	0.13215	0.42369	-0.110155	0.578969	1	1	0	1
ENSG00000075426	FOSL2	protein_coding	P15408	0.0982373	0.793465	0.288991	NA	0	0	0	0
ENSG00000075429	CACNG5	protein_coding	Q9UF02	-1.18165	NA	1.94294	NA	1	0	0	1
ENSG00000075461	CACNG4	protein_coding	Q9UBN1	0.303669	NA	0.728842	NA	1	0	0	1
ENSG00000075539	FRYL	protein_coding	O94915	-0.715982	4.5345e-07	-0.0569082	0.841216	0	0	0	0
ENSG00000075568	TMEM131	protein_coding	Q92545	-0.334643	0.0144922	0.338058	0.051373	1	1	0	1
ENSG00000075618	FSCN1	protein_coding	Q16658	0.116073	0.619979	-0.436435	0.0135498	0	1	0	1
ENSG00000075624	ACTB	protein_coding	P60709	1.10513	8.00787e-62	-0.328188	0.000211626	1	0	0	1
ENSG00000075643	MOCOS	protein_coding	Q96EN8	-0.483273	0.044819	0.252403	NA	0	0	0	0
ENSG00000075651	PLD1	protein_coding	Q13393	-0.113315	0.736448	-0.275467	0.362278	1	1	0	1
ENSG00000075673	ATP12A	protein_coding	P54707	0.854805	NA	0.111848	NA	1	0	0	1
ENSG00000075702	WDR62	protein_coding	O43379	0.0919007	0.564047	0.301215	0.0314696	0	0	0	0
ENSG00000075711	DLG1	protein_coding	Q12959	-0.28103	0.0598722	0.0129779	0.964825	1	1	0	1
ENSG00000075785	RAB7A	protein_coding	P51149	-0.300368	0.00290842	-0.400323	0.00016923	1	1	0	1
ENSG00000075790	BCAP29	protein_coding	Q9UHQ4	-0.443678	0.00262756	0.0205601	0.946116	1	1	0	1
ENSG00000075826	SEC31B	protein_coding	Q9NQW1	-0.251084	0.507615	0.75504	NA	1	1	0	1
ENSG00000075856	SART3	protein_coding	Q15020	0.056601	0.683303	0.108445	0.422533	0	0	0	0
ENSG00000075884	ARHGAP15	protein_coding	Q53QZ3	NA	NA	-1.02551	NA	1	1	0	1
ENSG00000075886	TUBA3D	protein_coding	P0DPH8	0.350771	NA	1.00454	NA	0	0	0	0
ENSG00000075891	PAX2	protein_coding	Q02962	-0.0883125	0.915489	-0.0670357	NA	1	1	0	1
ENSG00000075914	EXOSC7	protein_coding	Q15024	0.658106	9.44791e-10	-0.140793	0.324085	0	0	0	0
ENSG00000075945	KIFAP3	protein_coding	Q92845	-0.40515	0.000278199	-0.229424	0.115165	1	0	0	1
ENSG00000075975	MKRN2	protein_coding	Q9H000	-0.0660332	0.702299	-0.169443	0.281312	0	0	0	0
ENSG00000076003	MCM6	protein_coding	Q14566	-0.220666	0.0162136	-0.143887	0.18225	0	0	0	0
ENSG00000076043	REXO2	protein_coding	Q9Y3B8	0.322999	0.038859	-0.192993	0.286533	0	0	1	0
ENSG00000076053	RBM7	protein_coding	Q9Y580	-0.361123	0.314547	-0.292064	NA	0	0	0	0
ENSG00000076067	RBMS2	protein_coding	Q15434	-0.587396	0.0498985	-0.251849	NA	0	0	0	0
ENSG00000076108	BAZ2A	protein_coding	Q9UIF9	-0.0117728	0.937459	0.193093	0.0817548	0	0	0	0
ENSG00000076201	PTPN23	protein_coding	Q9H3S7	-0.0608074	0.752748	0.0393951	0.866309	1	0	0	1
ENSG00000076242	MLH1	protein_coding	P40692	-1.85183	NA	-1.97796	NA	1	0	1	0
ENSG00000076248	UNG	protein_coding	P13051	-0.00893789	0.95851	-0.364894	0.00163053	0	0	1	0
ENSG00000076258	FMO4	protein_coding	P31512	-0.506372	0.474958	-0.366196	NA	1	0	0	1
ENSG00000076321	KLHL20	protein_coding	Q9Y2M5	-0.0234946	0.940276	0.0624534	0.854804	1	1	0	1
ENSG00000076344	RGS11	protein_coding	O94810	-3.67273	NA	-1.02551	NA	0	0	0	0
ENSG00000076351	SLC46A1	protein_coding	Q96NT5	-0.0793814	0.883034	0.415363	NA	1	1	0	1
ENSG00000076356	PLXNA2	protein_coding	O75051	0.402888	0.0514814	0.271443	0.294089	1	0	0	1
ENSG00000076382	SPAG5	protein_coding	Q96R06	-0.309498	0.00553434	0.0194577	0.929967	0	0	0	0
ENSG00000076513	ANKRD13A	protein_coding	Q8IZ07	-0.303276	0.0507202	-0.0896415	0.689438	1	1	0	1
ENSG00000076554	TPD52	protein_coding	P55327	0.236976	0.483746	-0.025898	0.957629	1	1	0	1
ENSG00000076555	ACACB	protein_coding	O00763	-0.00622227	0.984062	0.401767	0.112474	0	1	1	1
ENSG00000076604	TRAF4	protein_coding	Q9BUZ4	0.704596	8.92803e-05	0.0549517	0.847086	1	0	0	1
ENSG00000076641	PAG1	protein_coding	Q9NWQ8	-0.268226	0.283874	0.220586	0.496233	1	1	0	1
ENSG00000076650	GPATCH1	protein_coding	Q9BRR8	-0.151754	0.514109	-0.18488	0.468042	0	1	0	1
ENSG00000076662	ICAM3	protein_coding	P32942	-1.74321	NA	NA	NA	1	0	0	1
ENSG00000076685	NT5C2	protein_coding	P49902	-0.620049	7.79504e-07	-0.0793642	0.729075	0	0	0	0
ENSG00000076706	MCAM	protein_coding	P43121	0.4798	0.00659135	0.420043	0.0302257	1	1	0	1
ENSG00000076716	GPC4	protein_coding	O75487	1.02197	1.13109e-20	0.438801	0.00249661	1	1	0	1
ENSG00000076770	MBNL3	protein_coding	Q9NUK0	-0.5238	0.0517599	0.237527	NA	0	1	0	1
ENSG00000076826	CAMSAP3	protein_coding	Q9P1Y5	0.211586	0.467577	-0.00046789	0.999266	0	0	0	0
ENSG00000076864	RAP1GAP	protein_coding	P47736	-0.0320523	0.95887	0.0828375	NA	1	0	0	1
ENSG00000076924	XAB2	protein_coding	Q9HCS7	0.739418	2.487e-09	0.0859893	0.623067	1	1	0	1
ENSG00000076928	ARHGEF1	protein_coding	Q92888	0.48733	0.00396053	0.237737	0.263623	1	1	0	1
ENSG00000076944	STXBP2	protein_coding	Q15833	0.166767	0.60245	0.249493	0.454216	1	0	0	1
ENSG00000076984	MAP2K7	protein_coding	O14733	-0.0218744	0.919101	0.202908	0.238521	0	1	0	1
ENSG00000077009	NMRK2	protein_coding	Q9NPI5	-0.551997	0.549643	-0.274636	NA	1	1	0	1
ENSG00000077044	DGKD	protein_coding	Q16760	0.138411	0.480403	0.236346	0.249743	1	0	0	1
ENSG00000077063	CTTNBP2	protein_coding	Q8WZ74	0.422123	0.0876395	0.0783674	0.830395	0	0	0	0
ENSG00000077080	ACTL6B	protein_coding	O94805	0.748569	0.456789	0.207668	NA	0	0	0	0
ENSG00000077092	RARB	protein_coding	P10826	-0.0578349	0.882889	-0.0247846	0.959533	0	0	0	0
ENSG00000077097	TOP2B	protein_coding	Q02880	-0.416557	7.63904e-06	-0.331214	0.00330885	0	0	0	0
ENSG00000077147	TM9SF3	protein_coding	Q9HD45	0.311186	0.00137008	0.427824	1.13216e-05	1	1	0	1
ENSG00000077150	NFKB2	protein_coding	Q00653	0.263445	0.189825	0.0593975	0.838128	0	0	0	0
ENSG00000077152	UBE2T	protein_coding	Q9NPD8	-0.026489	0.858802	-0.189144	0.08303	0	0	0	0
ENSG00000077157	PPP1R12B	protein_coding	O60237	-0.0917308	0.776337	0.083332	0.831495	0	1	0	1
ENSG00000077232	DNAJC10	protein_coding	Q8IXB1	-0.291379	0.00215898	0.258823	0.0279709	1	0	0	1
ENSG00000077235	GTF3C1	protein_coding	Q12789	0.103511	0.326305	0.03513	0.804251	1	0	0	1
ENSG00000077238	IL4R	protein_coding	P24394	0.319173	0.504139	-0.271235	NA	1	1	0	1
ENSG00000077254	USP33	protein_coding	Q8TEY7	-0.425639	9.49605e-07	0.012901	0.945242	1	1	0	1
ENSG00000077264	PAK3	protein_coding	O75914	0.4885	0.511647	0.0442137	NA	1	0	0	1
ENSG00000077274	CAPN6	protein_coding	Q9Y6Q1	-1.001	NA	-1.89604	NA	0	0	0	0
ENSG00000077279	DCX	protein_coding	O43602	-0.0214983	NA	-0.978207	NA	0	0	0	0
ENSG00000077312	SNRPA	protein_coding	P09012	0.677909	6.59229e-15	-0.156295	0.157437	0	0	0	0
ENSG00000077327	SPAG6	protein_coding	O75602	-0.591765	0.706541	0.425984	NA	0	0	0	0
ENSG00000077348	EXOSC5	protein_coding	Q9NQT4	0.741337	5.62111e-08	-0.110348	0.554008	0	0	0	0
ENSG00000077380	DYNC1I2	protein_coding	Q13409	-0.544833	0.000299694	-0.122321	0.599436	1	1	0	1
ENSG00000077420	APBB1IP	protein_coding	Q7Z5R6	0.876132	NA	0.834652	NA	1	1	0	1
ENSG00000077454	LRCH4	protein_coding	O75427	0.419472	0.136418	0.07343	0.858459	0	0	0	0
ENSG00000077458	FAM76B	protein_coding	Q5HYJ3	-0.437299	0.00875573	-0.231999	0.263889	0	0	0	0
ENSG00000077463	SIRT6	protein_coding	Q8N6T7	0.5224	0.00171843	0.0358057	0.899602	0	0	0	0
ENSG00000077498	TYR	protein_coding	P14679	NA	NA	NA	NA	1	1	0	1
ENSG00000077514	POLD3	protein_coding	Q15054	-0.729423	8.7882e-11	-0.226198	0.14624	0	0	0	0
ENSG00000077522	ACTN2	protein_coding	P35609	0.260376	0.361443	0.427273	0.177348	1	0	0	1
ENSG00000077549	CAPZB	protein_coding	P47756	0.200147	0.0226203	-0.184444	0.0583926	0	1	0	1
ENSG00000077585	GPR137B	protein_coding	O60478	0.188754	0.800312	0.24329	NA	1	0	0	1
ENSG00000077616	NAALAD2	protein_coding	Q9Y3Q0	-0.527757	0.466734	0.337323	NA	1	0	0	1
ENSG00000077684	JADE1	protein_coding	Q6IE81	0.0996965	0.599492	0.0952343	0.63479	1	0	0	1
ENSG00000077713	SLC25A43	protein_coding	Q8WUT9	0.00398359	0.996655	0.194657	NA	1	0	1	0
ENSG00000077721	UBE2A	protein_coding	P49459	-0.0868633	0.539804	-0.363726	0.00222938	0	1	0	1
ENSG00000077782	FGFR1	protein_coding	P11362	0.594484	1.36115e-06	0.19535	0.210933	1	1	0	1
ENSG00000077800	FKBP6	protein_coding	O75344	1.41681	NA	2.33318	NA	0	0	0	0
ENSG00000077935	SMC1B	protein_coding	Q8NDV3	-0.809879	0.54444	-0.606379	NA	0	0	0	0
ENSG00000077942	FBLN1	protein_coding	P23142	1.59441	2.64978e-49	0.325371	0.00621233	1	1	0	1
ENSG00000077943	ITGA8	protein_coding	P53708	0.240821	0.400069	0.131791	0.69943	1	0	0	1
ENSG00000077984	CST7	protein_coding	O76096	-0.303833	NA	0.548446	NA	1	1	0	1
ENSG00000078018	MAP2	protein_coding	P11137	-0.561534	0.624473	-0.429559	NA	0	0	0	0
ENSG00000078043	PIAS2	protein_coding	O75928	-0.32065	0.0878767	-0.0859471	0.779461	0	0	0	0
ENSG00000078053	AMPH	protein_coding	P49418	-0.0132107	0.976933	-0.0389086	NA	1	1	0	1
ENSG00000078061	ARAF	protein_coding	P10398	0.340284	0.0270966	0.435232	0.00871081	0	0	0	0
ENSG00000078070	MCCC1	protein_coding	Q96RQ3	-0.734322	3.95446e-05	-0.16994	0.553121	0	1	1	1
ENSG00000078081	LAMP3	protein_coding	Q9UQV4	0.35495	0.471432	0.422554	NA	1	1	0	1
ENSG00000078098	FAP	protein_coding	Q12884	NA	NA	NA	NA	1	1	0	1
ENSG00000078114	NEBL	protein_coding	O76041	-0.30633	0.42875	-0.0605009	NA	0	0	0	0
ENSG00000078124	ACER3	protein_coding	Q9NUN7	-0.18923	0.549549	0.0037231	0.995014	1	0	0	1
ENSG00000078140	UBE2K	protein_coding	P61086	0.319592	0.00210478	0.165734	0.244582	0	0	0	0
ENSG00000078142	PIK3C3	protein_coding	Q8NEB9	-0.351451	0.00364411	-0.395694	0.00891133	1	0	0	1
ENSG00000078177	N4BP2	protein_coding	Q86UW6	-0.728082	6.3262e-10	0.372112	0.0288926	0	1	0	1
ENSG00000078237	TIGAR	protein_coding	Q9NQ88	-0.330654	0.00844031	-0.29456	0.0446521	0	0	0	0
ENSG00000078246	TULP3	protein_coding	O75386	-0.271887	0.0139043	-0.529944	2.15116e-07	1	1	0	1
ENSG00000078269	SYNJ2	protein_coding	O15056	0.0800666	0.785548	0.289798	0.27972	0	0	0	0
ENSG00000078295	ADCY2	protein_coding	Q08462	NA	NA	NA	NA	1	0	0	1
ENSG00000078304	PPP2R5C	protein_coding	Q13362	-0.0569774	0.721713	-0.224706	0.0903504	1	1	0	1
ENSG00000078319	PMS2P1	unprocessed_pseudogene	A4D2B8	-0.750964	0.116644	-0.00328014	NA	0	0	0	0
ENSG00000078328	RBFOX1	protein_coding	Q9NWB1	-0.0214991	NA	0.898042	NA	0	1	0	1
ENSG00000078369	GNB1	protein_coding	P62873	-0.0880302	0.417575	-0.169895	0.0893872	1	1	0	1
ENSG00000078399	HOXA9	protein_coding	P31269	0.230808	0.14601	-0.0270215	0.917562	0	0	0	0
ENSG00000078401	EDN1	protein_coding	P05305	-0.0890677	NA	1.21551	NA	1	1	0	1
ENSG00000078403	MLLT10	protein_coding	P55197	-0.707734	5.94917e-07	0.221217	0.329814	0	0	0	0
ENSG00000078487	ZCWPW1	protein_coding	Q9H0M4	0.157356	0.803362	0.263531	NA	0	1	0	1
ENSG00000078549	ADCYAP1R1	protein_coding	P41586	0.556969	0.330196	0.586427	NA	1	1	0	1
ENSG00000078579	FGF20	protein_coding	Q9NP95	1.7131	NA	1.55765	NA	1	0	0	1
ENSG00000078589	P2RY10	protein_coding	O00398	NA	NA	NA	NA	1	0	0	1
ENSG00000078596	ITM2A	protein_coding	O43736	1.29897	0.303799	0.662831	NA	1	0	0	1
ENSG00000078618	NRDC	protein_coding	O43847	-0.643369	1.49764e-12	-0.0381691	0.819233	0	0	1	0
ENSG00000078668	VDAC3	protein_coding	Q9Y277	-0.805923	3.18813e-18	-0.347587	0.000710773	0	0	1	0
ENSG00000078674	PCM1	protein_coding	Q15154	-0.473327	3.01721e-07	-0.0197964	0.917562	1	0	0	1
ENSG00000078687	TNRC6C	protein_coding	Q9HCJ0	-0.221741	0.283797	0.179892	0.48663	0	0	0	0
ENSG00000078699	CBFA2T2	protein_coding	O43439	-0.147054	0.451425	-0.0679839	0.79282	0	0	0	0
ENSG00000078725	BRINP1	protein_coding	O60477	NA	NA	NA	NA	1	1	0	1
ENSG00000078747	ITCH.1	protein_coding	#N/A	-1.04442	1.63795e-06	0.10067	NA	0	0	0	0
ENSG00000078795	PKD2L2	protein_coding	Q9NZM6	0.239301	0.865323	1.09441	NA	1	1	0	1
ENSG00000078804	TP53INP2	protein_coding	Q8IXH6	-0.768005	0.0119597	0.0846809	NA	1	0	0	1
ENSG00000078808	SDF4	protein_coding	Q9BRK5	1.18641	1.55724e-32	0.380733	0.00112736	1	1	0	1
ENSG00000078814	MYH7B	protein_coding	A7E2Y1	0.117021	0.915341	0.525288	NA	1	0	0	1
ENSG00000078898	BPIFB2	protein_coding	Q8N4F0	0.940271	NA	0.898042	NA	1	1	0	1
ENSG00000078900	TP73	protein_coding	O15350	0.445504	0.164744	0.231399	NA	1	1	0	1
ENSG00000078902	TOLLIP	protein_coding	Q9H0E2	1.0636	7.77886e-20	-0.191828	0.255304	1	1	0	1
ENSG00000078967	UBE2D4	protein_coding	Q9Y2X8	-0.0355922	0.95531	0.304274	NA	0	1	0	1
ENSG00000079101	CLUL1	protein_coding	Q15846	0.268168	0.801146	-0.0598757	NA	1	1	0	1
ENSG00000079102	RUNX1T1	protein_coding	Q06455	-0.140159	0.658601	0.108488	0.777314	0	0	0	0
ENSG00000079112	CDH17	protein_coding	Q12864	0.739691	NA	1.63839	NA	1	1	0	1
ENSG00000079134	THOC1	protein_coding	Q96FV9	-0.0942788	0.60245	0.208918	0.251483	0	0	0	0
ENSG00000079150	FKBP7	protein_coding	Q9Y680	0.0100762	0.960376	0.0564398	0.782174	1	1	0	1
ENSG00000079156	OSBPL6	protein_coding	Q9BZF3	-0.561719	0.00284103	0.267685	0.329547	1	1	0	1
ENSG00000079215	SLC1A3	protein_coding	P43003	-0.0781119	0.767346	0.451638	0.0510581	1	0	0	1
ENSG00000079246	XRCC5	protein_coding	P13010	0.404325	0.00186404	-0.233407	0.42805	1	0	0	1
ENSG00000079257	LXN	protein_coding	Q9BS40	-0.327082	0.617854	-0.074295	NA	0	0	0	0
ENSG00000079263	SP140	protein_coding	Q13342	NA	NA	-1.02551	NA	0	0	0	0
ENSG00000079277	MKNK1	protein_coding	Q9BUB5	0.00301848	0.991995	-0.0773572	0.790301	0	0	0	0
ENSG00000079308	TNS1	protein_coding	Q9HBL0	-0.0441841	0.975523	-0.0458646	NA	0	0	0	0
ENSG00000079313	REXO1	protein_coding	Q8N1G1	0.660431	3.98616e-05	0.373725	0.0418548	0	0	0	0
ENSG00000079332	SAR1A	protein_coding	Q9NR31	0.245686	0.012046	-0.182088	0.113421	1	1	0	1
ENSG00000079335	CDC14A	protein_coding	Q9UNH5	-0.59596	0.0433096	-0.178502	NA	0	0	0	0
ENSG00000079337	RAPGEF3	protein_coding	O95398	0.225449	0.773649	0.587655	NA	1	0	0	1
ENSG00000079385	CEACAM1	protein_coding	P13688	-1.1862	NA	-0.320065	NA	1	0	0	1
ENSG00000079387	SENP1	protein_coding	Q9P0U3	-0.184852	0.25182	0.0291067	0.899541	0	0	0	0
ENSG00000079393	DUSP13	protein_coding	Q9UII6	2.64722	NA	2.60409	NA	0	0	0	0
ENSG00000079432	CIC	protein_coding	Q96RK0	-0.0406814	0.879411	0.14696	0.569979	0	1	0	1
ENSG00000079435	LIPE	protein_coding	Q05469	-0.178903	0.637161	0.285971	NA	0	0	0	0
ENSG00000079459	FDFT1	protein_coding	P37268	0.583015	4.83987e-10	-0.0255319	0.880566	1	1	0	1
ENSG00000079462	PAFAH1B3	protein_coding	Q15102	0.738708	0.00018862	0.0734507	0.798815	1	0	0	1
ENSG00000079482	OPHN1	protein_coding	O60890	-0.185837	0.534164	0.31596	0.333402	0	1	0	1
ENSG00000079557	AFM	protein_coding	P43652	-0.983282	NA	NA	NA	1	1	0	1
ENSG00000079616	KIF22	protein_coding	Q14807	0.201356	0.0654255	-0.0964374	0.482895	0	0	0	0
ENSG00000079689	SCGN	protein_coding	O76038	-0.983282	NA	-2.8504	NA	1	0	0	1
ENSG00000079691	CARMIL1	protein_coding	Q5VZK9	-0.452613	0.0713541	-0.0788161	0.841112	1	0	0	1
ENSG00000079739	PGM1	protein_coding	P36871	0.271183	0.00456042	-0.160388	0.170389	1	0	0	1
ENSG00000079785	DDX1	protein_coding	Q92499	-0.839729	1.18359e-19	-0.27846	0.00873212	1	0	0	1
ENSG00000079805	DNM2	protein_coding	P50570	0.37179	3.89611e-05	0.0310642	0.8435	1	1	0	1
ENSG00000079819	EPB41L2	protein_coding	O43491	-0.117006	0.263821	-0.271102	0.0051414	1	1	0	1
ENSG00000079841	RIMS1	protein_coding	Q86UR5	-1.1423	0.290602	-0.47348	NA	1	1	0	1
ENSG00000079931	MOXD1	protein_coding	Q6UVY6	0.395766	0.0881643	0.281259	0.283498	1	1	0	1
ENSG00000079950	STX7	protein_coding	O15400	-0.819514	4.16371e-08	0.0227722	0.951487	1	1	0	1
ENSG00000079974	RABL2B	protein_coding	Q9UNT1	0.70446	0.0199511	0.412018	NA	0	1	0	1
ENSG00000079999	KEAP1	protein_coding	Q14145	0.104214	0.542704	0.0885596	0.659437	1	0	0	1
ENSG00000080007	DDX43	protein_coding	Q9NXZ2	-0.983282	NA	NA	NA	0	0	0	0
ENSG00000080031	PTPRH	protein_coding	Q9HD43	0.462074	0.676775	0.712934	NA	1	0	0	1
ENSG00000080166	DCT	protein_coding	P40126	0.336716	0.85202	-0.0170727	NA	1	0	0	1
ENSG00000080189	SLC35C2	protein_coding	Q9NQQ7	0.775789	1.84326e-08	0.467929	0.00194596	1	1	0	1
ENSG00000080200	CRYBG3	protein_coding	Q68DQ2	-0.732665	1.16207e-06	-0.118441	0.63479	0	0	0	0
ENSG00000080224	EPHA6	protein_coding	Q9UF33	0.121945	0.771075	0.428846	NA	1	0	0	1
ENSG00000080293	SCTR	protein_coding	P47872	-0.0214979	NA	-0.0637281	NA	1	0	0	1
ENSG00000080298	RFX3	protein_coding	P48380	-0.11415	0.755673	-0.468304	0.0914995	0	1	0	1
ENSG00000080345	RIF1	protein_coding	Q5UIP0	-0.273831	0.00104034	0.235648	0.0201099	1	1	0	1
ENSG00000080371	RAB21	protein_coding	Q9UL25	-0.357728	0.00229344	-0.0662298	0.727236	1	0	0	1
ENSG00000080493	SLC4A4	protein_coding	Q9Y6R1	-0.224541	0.673034	0.194091	NA	1	0	0	1
ENSG00000080503	SMARCA2	protein_coding	P51531	-0.287388	0.0402671	-0.150614	0.387755	0	1	0	1
ENSG00000080511	RDH8	protein_coding	Q9NYR8	-0.0214984	NA	0.898042	NA	1	1	0	1
ENSG00000080546	SESN1	protein_coding	Q9Y6P5	-0.510771	0.00593834	-0.142867	0.617548	0	0	0	0
ENSG00000080561	MID2	protein_coding	Q9UJV3	-0.163833	0.484927	0.272595	0.299212	0	0	0	0
ENSG00000080572	PIH1D3	protein_coding	Q9NQM4	-0.384606	NA	-0.123953	NA	0	0	0	0
ENSG00000080573	COL5A3	protein_coding	P25940	0.813437	NA	-0.651785	NA	1	1	0	1
ENSG00000080603	SRCAP	protein_coding	Q6ZRS2	-0.126218	0.634641	-0.153521	0.565336	1	0	0	1
ENSG00000080608	PUM3	protein_coding	Q15397	-0.470082	2.19727e-05	-0.12443	0.45087	1	0	0	1
ENSG00000080618	CPB2	protein_coding	Q96IY4	-1.98205	NA	-1.51232	NA	1	1	0	1
ENSG00000080644	CHRNA3	protein_coding	P32297	0.994164	0.00195131	0.0384952	NA	1	0	0	1
ENSG00000080709	KCNN2	protein_coding	Q9H2S1	0.053292	0.975694	0.337046	NA	1	0	0	1
ENSG00000080802	CNOT4	protein_coding	O95628	-0.0431921	0.829981	-0.243747	0.113658	0	0	0	0
ENSG00000080815	PSEN1	protein_coding	P49768	0.118591	0.47751	0.165366	0.346585	1	1	0	1
ENSG00000080819	CPOX	protein_coding	P36551	0.327032	0.00274321	-0.0327375	0.855905	0	0	1	0
ENSG00000080822	CLDND1	protein_coding	Q9NY35	-0.21834	0.333975	0.0247033	0.948753	1	1	0	1
ENSG00000080823	MOK	protein_coding	Q9UQ07	-0.0878946	0.744843	0.273551	0.27972	0	1	0	1
ENSG00000080824	HSP90AA1	protein_coding	P07900	0.490966	4.43519e-05	-0.684966	2.10242e-07	1	0	0	1
ENSG00000080839	RBL1	protein_coding	P28749	-0.581531	8.87961e-09	-0.192659	0.146702	0	0	0	0
ENSG00000080845	DLGAP4	protein_coding	Q9Y2H0	-0.388365	0.0528393	-0.159842	0.568971	1	0	0	1
ENSG00000080854	IGSF9B	protein_coding	Q9UPX0	0.134893	0.741909	0.190326	NA	1	0	0	1
ENSG00000080910	CFHR2	protein_coding	P36980	NA	NA	NA	NA	1	1	0	1
ENSG00000080947	CROCCP3	transcribed_unprocessed_pseudogene	Q8IVE0	0.491885	0.281128	0.979156	NA	0	0	0	0
ENSG00000080986	NDC80	protein_coding	O14777	-0.335308	0.00461172	0.0615377	0.751587	1	0	0	1
ENSG00000081014	AP4E1	protein_coding	Q9UPM8	-0.916324	3.0543e-06	0.149077	0.693248	0	0	0	0
ENSG00000081019	RSBN1	protein_coding	Q5VWQ0	0.166862	0.244694	0.0211748	0.926448	0	1	0	1
ENSG00000081026	MAGI3	protein_coding	Q5TCQ9	0.290136	0.0499907	0.00825721	0.978528	1	1	0	1
ENSG00000081041	CXCL2	protein_coding	P19875	0.0159979	NA	1.63865	NA	1	1	0	1
ENSG00000081051	AFP	protein_coding	P02771	NA	NA	-1.02551	NA	1	1	0	1
ENSG00000081052	COL4A4	protein_coding	P53420	0.00381838	0.996045	0.316743	NA	1	1	0	1
ENSG00000081059	TCF7	protein_coding	P36402	0.00266786	0.995693	0.47524	NA	0	0	0	0
ENSG00000081087	OSTM1	protein_coding	Q86WC4	0.462212	0.0201752	0.176128	0.490778	1	1	0	1
ENSG00000081138	CDH7	protein_coding	Q9ULB5	-2.23199	NA	0.898042	NA	1	0	0	1
ENSG00000081148	IMPG2	protein_coding	Q9BZV3	-0.270857	NA	1.16226	NA	1	0	0	1
ENSG00000081154	PCNP	protein_coding	Q8WW12	-0.189061	0.296316	-0.00574287	0.98633	0	0	0	0
ENSG00000081177	EXD2	protein_coding	Q9NVH0	-0.278849	0.173796	0.335321	0.159564	0	0	0	0
ENSG00000081181	ARG2	protein_coding	P78540	0.162593	0.456582	-0.337514	0.0865735	0	0	1	0
ENSG00000081189	MEF2C	protein_coding	Q06413	-0.214593	0.335241	-0.116117	0.682482	0	1	0	1
ENSG00000081237	PTPRC	protein_coding	P08575	0.940271	NA	0.898042	NA	1	1	0	1
ENSG00000081248	CACNA1S	protein_coding	Q13698	-0.354526	NA	1.46429	NA	1	0	0	1
ENSG00000081277	PKP1	protein_coding	Q13835	NA	NA	NA	NA	1	0	0	1
ENSG00000081307	UBA5	protein_coding	Q9GZZ9	-0.369229	0.0007299	-0.0762175	0.630821	1	1	0	1
ENSG00000081320	STK17B	protein_coding	O94768	-0.322248	0.0715898	0.068852	0.81459	1	1	0	1
ENSG00000081377	CDC14B	protein_coding	O60729	-0.171129	0.574313	0.271244	0.408526	0	0	0	0
ENSG00000081386	ZNF510	protein_coding	Q9Y2H8	-0.822139	0.0572143	0.32589	NA	0	1	0	1
ENSG00000081479	LRP2	protein_coding	P98164	0.314378	0.0232954	0.47723	0.00184835	1	1	0	1
ENSG00000081665	ZNF506	protein_coding	Q5JVG8	-1.32566	0.0607113	-0.018124	NA	0	0	0	0
ENSG00000081692	JMJD4	protein_coding	Q9H9V9	0.510247	0.00809139	0.254627	0.287493	0	1	0	1
ENSG00000081721	DUSP12	protein_coding	Q9UNI6	-0.303315	0.153689	0.14383	0.620759	0	0	0	0
ENSG00000081760	AACS	protein_coding	Q86V21	0.298607	0.023897	0.169986	0.284981	0	1	0	1
ENSG00000081791	KIAA0141	protein_coding	#N/A	0.448855	0.0099678	0.051986	0.852291	0	1	1	1
ENSG00000081800	SLC13A1	protein_coding	Q9BZW2	NA	NA	NA	NA	1	0	0	1
ENSG00000081803	CADPS2	protein_coding	Q86UW7	-0.448921	0.0158853	0.0249908	0.950008	0	1	0	1
ENSG00000081818	PCDHB4	protein_coding	Q9Y5E5	-0.0214983	NA	0.898042	NA	1	1	0	1
ENSG00000081842	PCDHA6	protein_coding	Q9UN73	-0.983282	NA	NA	NA	1	1	0	1
ENSG00000081853	PCDHGA2	protein_coding	Q9Y5H1	-1.05818	NA	-0.233579	NA	1	1	0	1
ENSG00000081870	HSPB11	protein_coding	Q9Y547	-0.744228	7.07871e-12	-0.441972	0.0011052	0	0	0	0
ENSG00000081913	PHLPP1	protein_coding	O60346	-0.0601516	0.83552	-0.0706081	0.823839	0	0	0	0
ENSG00000081923	ATP8B1	protein_coding	O43520	-0.484228	0.670148	-0.266914	NA	1	0	0	1
ENSG00000081985	IL12RB2	protein_coding	Q99665	0.108896	0.90365	0.29215	NA	1	1	0	1
ENSG00000082014	SMARCD3	protein_coding	Q6STE5	0.419721	0.0617862	0.0318049	0.9264	0	0	0	0
ENSG00000082068	WDR70	protein_coding	Q9NW82	-0.0826026	0.622944	-0.0797733	0.658753	0	0	0	0
ENSG00000082074	FYB	protein_coding	#N/A	NA	NA	NA	NA	0	0	0	0
ENSG00000082126	MPP4	protein_coding	Q96JB8	-1.76269	NA	1.28312	NA	0	0	0	0
ENSG00000082146	STRADB	protein_coding	Q9C0K7	-0.0801325	0.852559	-0.126303	NA	0	0	0	0
ENSG00000082153	BZW1	protein_coding	Q7L1Q6	-0.502785	7.50039e-05	-0.403229	0.00530045	1	1	0	1
ENSG00000082175	PGR	protein_coding	P06401	NA	NA	NA	NA	0	0	0	0
ENSG00000082196	C1QTNF3	protein_coding	Q9BXJ4	-1.85183	NA	-1.02551	NA	1	1	0	1
ENSG00000082212	ME2	protein_coding	P23368	-0.356387	0.00505824	-0.134554	0.438704	0	0	1	0
ENSG00000082213	C5orf22	protein_coding	Q49AR2	-0.492295	0.00300714	-0.21881	0.342009	0	0	0	0
ENSG00000082258	CCNT2	protein_coding	O60583	-0.879591	2.52672e-07	-0.296991	0.20469	1	1	0	1
ENSG00000082269	FAM135A	protein_coding	Q9P2D6	-0.788131	3.18162e-06	0.167143	0.572504	0	0	0	0
ENSG00000082293	COL19A1	protein_coding	Q14993	0.591352	0.522443	0.43485	NA	1	1	0	1
ENSG00000082397	EPB41L3	protein_coding	Q9Y2J2	-0.0591498	0.737407	-0.188027	0.227054	1	1	0	1
ENSG00000082438	COBLL1	protein_coding	Q53SF7	-0.373854	0.053194	-0.0797831	0.785285	0	1	0	1
ENSG00000082458	DLG3	protein_coding	Q92796	-0.100446	0.686836	-0.0581481	0.853001	1	0	0	1
ENSG00000082482	KCNK2	protein_coding	O95069	-2.0419	NA	NA	NA	1	0	0	1
ENSG00000082497	SERTAD4	protein_coding	Q9NUC0	NA	NA	NA	NA	0	0	0	0
ENSG00000082512	TRAF5	protein_coding	O00463	-0.636936	0.093657	0.142368	NA	0	0	0	0
ENSG00000082515	MRPL22	protein_coding	Q9NWU5	0.0814685	0.656256	-0.284983	0.0304454	0	1	1	1
ENSG00000082516	GEMIN5	protein_coding	Q8TEQ6	-0.436942	6.11139e-06	-0.05575	0.742054	1	0	0	1
ENSG00000082556	OPRK1	protein_coding	P41145	NA	NA	NA	NA	1	1	0	1
ENSG00000082641	NFE2L1	protein_coding	Q14494	0.220232	0.0289171	0.256708	0.0281635	1	1	0	1
ENSG00000082684	SEMA5B	protein_coding	Q9P283	0.344452	0.851172	2.12421	NA	1	0	0	1
ENSG00000082701	GSK3B	protein_coding	P49841	-0.083438	0.660685	-0.0372179	0.880438	1	0	0	1
ENSG00000082781	ITGB5	protein_coding	P18084	-0.0750201	0.858735	0.0953782	NA	1	1	0	1
ENSG00000082805	ERC1	protein_coding	Q8IUD2	-0.174227	0.329924	-0.0644104	0.783066	1	1	0	1
ENSG00000082898	XPO1	protein_coding	O14980	-0.568109	2.44908e-12	0.163866	0.0900939	1	1	0	1
ENSG00000082929	LINC01587	processed_transcript	Q99440	NA	NA	NA	NA	0	0	0	0
ENSG00000082996	RNF13	protein_coding	O43567	-0.24052	0.202981	0.0535323	0.858675	1	1	0	1
ENSG00000083067	TRPM3	protein_coding	Q9HCF6	-1.05877	NA	2.4327	NA	1	0	0	1
ENSG00000083093	PALB2	protein_coding	Q86YC2	-0.574139	0.000146198	-0.0844433	0.759969	0	0	0	0
ENSG00000083097	DOPEY1	protein_coding	Q5JWR5	-0.756963	1.02664e-07	0.137381	0.573394	1	1	0	1
ENSG00000083099	LYRM2	protein_coding	Q9NU23	-0.883875	3.29907e-10	-0.278342	0.185417	0	0	1	0
ENSG00000083123	BCKDHB	protein_coding	P21953	-0.0290019	0.927695	-0.285961	0.241695	0	1	1	1
ENSG00000083168	KAT6A	protein_coding	Q92794	-0.169639	0.196797	0.0750836	0.686181	0	0	0	0
ENSG00000083223	ZCCHC6	protein_coding	#N/A	-0.452808	0.000263654	-0.103356	0.573394	0	0	0	0
ENSG00000083290	ULK2	protein_coding	Q8IYT8	0.0345783	0.932461	0.278538	NA	1	0	0	1
ENSG00000083307	GRHL2	protein_coding	Q6ISB3	-0.983282	NA	NA	NA	1	0	0	1
ENSG00000083312	TNPO1	protein_coding	Q92973	-0.266111	0.00127063	0.0118526	0.940599	0	0	0	0
ENSG00000083444	PLOD1	protein_coding	Q02809	0.617771	1.30467e-08	0.37505	0.00586881	1	1	0	1
ENSG00000083454	P2RX5	protein_coding	Q93086	-0.864919	NA	2.10228	NA	1	0	0	1
ENSG00000083457	ITGAE	protein_coding	P38570	-0.0826522	0.687526	0.111434	0.614403	1	0	0	1
ENSG00000083520	DIS3	protein_coding	Q9Y2L1	-0.0226757	0.858591	-0.245891	0.0056398	1	0	0	1
ENSG00000083535	PIBF1	protein_coding	Q8WXW3	-0.97302	1.49668e-18	-0.258923	0.0851443	1	0	0	1
ENSG00000083544	TDRD3	protein_coding	Q9H7E2	-0.435334	0.032113	-0.122862	0.687724	1	1	0	1
ENSG00000083622	AC000111.6	antisense	#N/A	NA	NA	NA	NA	0	0	0	0
ENSG00000083635	NUFIP1	protein_coding	Q9UHK0	-0.0759984	0.799201	-0.420515	0.054811	0	0	0	0
ENSG00000083642	PDS5B	protein_coding	Q9NTI5	-0.472729	1.72481e-05	0.0259677	0.905459	0	0	0	0
ENSG00000083720	OXCT1	protein_coding	P55809	-0.569404	1.76873e-05	-0.322631	0.0346125	0	1	1	1
ENSG00000083750	RRAGB	protein_coding	Q5VZM2	-0.114171	0.755324	0.083956	NA	1	1	0	1
ENSG00000083782	EPYC	protein_coding	Q99645	NA	NA	NA	NA	1	1	0	1
ENSG00000083799	CYLD	protein_coding	Q9NQC7	-0.613698	1.97169e-05	-0.0146656	0.962278	0	0	0	0
ENSG00000083807	SLC27A5	protein_coding	Q9Y2P5	-0.275909	0.466527	-0.00443439	NA	1	0	0	1
ENSG00000083812	ZNF324	protein_coding	O75467	0.00254471	0.994292	-0.0212726	0.958617	0	0	0	0
ENSG00000083814	ZNF671	protein_coding	Q8TAW3	-1.10649	0.32749	0.391781	NA	0	0	0	0
ENSG00000083817	ZNF416	protein_coding	Q9BWM5	0.293342	0.408913	-0.219789	NA	0	0	0	0
ENSG00000083828	ZNF586	protein_coding	Q9NXT0	0.562774	0.0175571	-0.0536298	0.887685	0	1	0	1
ENSG00000083838	ZNF446	protein_coding	Q9NWS9	0.381797	0.426116	0.496657	NA	1	0	0	1
ENSG00000083844	ZNF264	protein_coding	O43296	-0.236507	0.355921	-0.333171	0.208846	0	0	0	0
ENSG00000083845	RPS5	protein_coding	P46782	0.0730576	0.53357	-0.164066	0.137625	1	1	0	1
ENSG00000083857	FAT1	protein_coding	Q14517	-0.0764353	0.632657	0.254332	0.0792505	1	1	0	1
ENSG00000083896	YTHDC1	protein_coding	Q96MU7	-0.267021	0.578634	-0.470387	NA	1	1	0	1
ENSG00000083937	CHMP2B	protein_coding	Q9UQN3	-0.77792	2.34794e-14	-0.37183	0.00293215	1	0	0	1
ENSG00000084070	SMAP2	protein_coding	Q8WU79	-0.430205	0.00052865	-0.130947	0.456026	0	0	0	0
ENSG00000084072	PPIE	protein_coding	Q9UNP9	0.171399	0.212107	-0.146841	0.282032	1	0	0	1
ENSG00000084073	ZMPSTE24	protein_coding	O75844	0.0566609	0.695751	0.235656	0.0446865	1	1	0	1
ENSG00000084090	STARD7	protein_coding	Q9NQZ5	-0.171483	0.142758	-0.0337509	0.8435	0	1	1	1
ENSG00000084092	NOA1	protein_coding	Q8NC60	0.157294	0.369401	0.0265225	0.920672	0	1	1	1
ENSG00000084093	REST	protein_coding	Q13127	-0.571437	8.73122e-05	-0.446578	0.0103879	0	0	0	0
ENSG00000084110	HAL	protein_coding	P42357	-2.06155	0.140197	-1.23431	NA	0	0	0	0
ENSG00000084112	SSH1	protein_coding	Q8WYL5	-0.417005	0.019402	0.287041	0.210698	1	1	0	1
ENSG00000084207	GSTP1	protein_coding	P09211	0.844676	2.35809e-23	-0.263693	0.00545464	1	0	0	1
ENSG00000084234	APLP2	protein_coding	Q06481	0.835563	2.26784e-25	0.0947163	0.44172	1	1	0	1
ENSG00000084444	FAM234B	protein_coding	A2RU67	0.400974	0.000939178	0.00681941	0.974355	1	1	0	1
ENSG00000084453	SLCO1A2	protein_coding	P46721	0.813437	NA	-1.08599	NA	1	1	0	1
ENSG00000084463	WBP11	protein_coding	Q9Y2W2	-0.239502	0.0295662	-0.306467	0.00542899	0	0	0	0
ENSG00000084623	EIF3I	protein_coding	Q13347	0.165308	0.174485	-0.379646	0.000634166	0	0	0	0
ENSG00000084628	NKAIN1	protein_coding	Q4KMZ8	0.409406	0.522858	1.01264	NA	1	0	0	1
ENSG00000084636	COL16A1	protein_coding	Q07092	-0.0872894	NA	0.365067	NA	1	1	0	1
ENSG00000084652	TXLNA	protein_coding	P40222	-0.238546	0.0168327	-0.0695914	0.627711	1	0	0	1
ENSG00000084674	APOB	protein_coding	P04114	-0.93387	NA	0.898042	NA	1	1	0	1
ENSG00000084676	NCOA1	protein_coding	Q15788	-0.570885	0.00401262	-0.29081	0.26897	1	1	0	1
ENSG00000084693	AGBL5	protein_coding	Q8NDL9	0.216618	0.171004	0.238559	0.176507	0	0	0	0
ENSG00000084710	EFR3B	protein_coding	Q9Y2G0	-0.0368075	0.946298	-0.137037	NA	1	0	0	1
ENSG00000084731	KIF3C	protein_coding	O14782	-0.484767	0.0676786	-0.1585	0.69235	0	0	0	0
ENSG00000084733	RAB10	protein_coding	P61026	-0.302131	0.0137225	-0.136799	0.389566	1	0	0	1
ENSG00000084734	GCKR	protein_coding	Q14397	1.61118	NA	1.30208	NA	0	0	0	0
ENSG00000084754	HADHA	protein_coding	P40939	-0.448457	2.08003e-05	-0.242324	0.0677501	0	0	1	0
ENSG00000084764	MAPRE3	protein_coding	Q9UPY8	0.463201	0.00556124	-0.0753521	0.761246	0	0	0	0
ENSG00000084774	CAD	protein_coding	P27708	0.0580437	0.638326	0.113668	0.305158	1	0	0	1
ENSG00000085063	CD59	protein_coding	P13987	-0.253917	0.108798	0.0310847	0.906921	1	1	0	1
ENSG00000085117	CD82	protein_coding	P27701	0.402855	0.496722	-0.147436	NA	1	1	0	1
ENSG00000085185	BCORL1	protein_coding	Q5H9F3	0.0226839	0.89301	-0.421721	8.07927e-05	1	1	0	1
ENSG00000085224	ATRX	protein_coding	P46100	-0.789659	6.46346e-15	-0.0970941	0.57868	0	0	0	0
ENSG00000085231	AK6	protein_coding	Q9Y3D8	NA	NA	NA	NA	1	0	0	1
ENSG00000085265	FCN1	protein_coding	O00602	NA	NA	NA	NA	1	1	0	1
ENSG00000085274	MYNN	protein_coding	Q9NPC7	0.159465	0.521415	-0.113114	0.672722	0	0	0	0
ENSG00000085276	MECOM	protein_coding	Q03112	-0.590927	1.07359e-05	-0.181863	0.382387	0	0	0	0
ENSG00000085365	SCAMP1	protein_coding	O15126	0.195576	0.203586	0.26901	0.103426	1	1	0	1
ENSG00000085377	PREP	protein_coding	P48147	0.0992131	0.415822	-0.0904647	0.499482	1	0	0	1
ENSG00000085382	HACE1	protein_coding	Q8IYU2	-0.320434	0.0480491	0.0490465	0.826366	1	1	0	1
ENSG00000085415	SEH1L	protein_coding	Q96EE3	0.0295909	0.856994	-0.0845888	0.569014	1	0	0	1
ENSG00000085433	WDR47	protein_coding	O94967	-0.298358	0.0481529	-0.0640595	0.788544	0	0	0	0
ENSG00000085449	WDFY1	protein_coding	Q8IWB7	-0.0707512	0.723565	-0.159852	0.4326	0	0	0	0
ENSG00000085465	OVGP1	protein_coding	Q12889	-0.568552	0.0355268	0.689196	NA	1	1	0	1
ENSG00000085491	SLC25A24	protein_coding	Q6NUK1	-0.247138	0.0163222	-0.149404	0.253684	1	0	1	0
ENSG00000085511	MAP3K4	protein_coding	Q9Y6R4	-0.5383	0.0004129	0.218338	0.347689	0	0	0	0
ENSG00000085514	PILRA	protein_coding	Q9UKJ1	-0.139972	NA	0.589513	NA	1	1	0	1
ENSG00000085552	IGSF9	protein_coding	Q9P2J2	1.03797	0.16147	0.666908	NA	1	1	0	1
ENSG00000085563	ABCB1	protein_coding	P08183	-0.0790285	0.801114	0.122546	0.758148	1	0	0	1
ENSG00000085644	ZNF213	protein_coding	O14771	0.239921	0.368996	0.280607	0.323878	0	1	0	1
ENSG00000085662	AKR1B1	protein_coding	P15121	0.693398	6.48404e-19	-0.392628	9.54e-06	1	0	0	1
ENSG00000085719	CPNE3	protein_coding	O75131	-0.440234	9.51367e-05	-0.353538	0.0051414	1	0	0	1
ENSG00000085721	RRN3	protein_coding	Q9NYV6	-0.649145	0.000119833	0.34733	0.172147	0	0	0	0
ENSG00000085733	CTTN	protein_coding	Q14247	-0.157136	0.125425	0.0718254	0.605441	1	1	0	1
ENSG00000085741	WNT11	protein_coding	O96014	0.47384	0.327207	-0.250584	NA	1	1	0	1
ENSG00000085760	MTIF2	protein_coding	P46199	-0.763933	1.65371e-09	-0.0430551	0.854052	0	0	1	0
ENSG00000085788	DDHD2	protein_coding	O94830	-0.687734	2.1947e-05	-0.269382	0.227588	1	0	0	1
ENSG00000085831	TTC39A	protein_coding	Q5SRH9	0.0348575	0.950518	-0.0554907	NA	0	0	0	0
ENSG00000085832	EPS15	protein_coding	P42566	-0.266033	0.0159887	-0.0266485	0.896073	1	1	0	1
ENSG00000085840	ORC1	protein_coding	Q13415	0.00517159	0.975694	-0.485492	1.85092e-06	1	1	0	1
ENSG00000085871	MGST2	protein_coding	Q99735	1.41041	2.14483e-28	-0.274544	0.0908396	1	1	0	1
ENSG00000085872	CHERP	protein_coding	Q8IWX8	0.411242	0.000931571	-0.236988	0.0892287	1	0	0	1
ENSG00000085978	ATG16L1	protein_coding	Q676U5	NA	NA	NA	NA	0	0	0	0
ENSG00000085982	USP40	protein_coding	Q9NVE5	-0.56046	0.000540983	0.396791	0.0761188	0	1	0	1
ENSG00000085998	POMGNT1	protein_coding	Q8WZA1	-0.134953	0.638806	0.279634	0.314675	1	0	0	1
ENSG00000085999	RAD54L	protein_coding	Q92698	-0.475674	0.00065017	0.110817	0.601124	0	0	0	0
ENSG00000086015	MAST2	protein_coding	Q6P0Q8	0.0511468	0.846088	0.313115	0.12439	1	0	0	1
ENSG00000086061	DNAJA1	protein_coding	P31689	-0.370997	0.000303336	-0.681572	2.61036e-14	1	0	0	1
ENSG00000086062	B4GALT1	protein_coding	P15291	0.65547	5.88666e-06	0.113342	0.582131	1	1	0	1
ENSG00000086065	CHMP5	protein_coding	Q9NZZ3	-0.089539	0.552224	-0.328072	0.0160382	1	0	0	1
ENSG00000086102	NFX1	protein_coding	Q12986	-0.654342	8.5048e-12	-0.0307243	0.87737	1	0	0	1
ENSG00000086159	AQP6	protein_coding	Q13520	-1.03469	0.522794	0.761159	NA	1	0	0	1
ENSG00000086189	DIMT1	protein_coding	Q9UNQ2	-0.33041	0.0148185	-0.0751989	0.711638	0	0	0	0
ENSG00000086200	IPO11	protein_coding	Q9UI26	-0.193312	0.127298	-0.18955	0.126523	0	1	0	1
ENSG00000086205	FOLH1	protein_coding	Q04609	0.646693	NA	0.296752	NA	1	0	0	1
ENSG00000086232	EIF2AK1	protein_coding	Q9BQI3	-0.154061	0.153989	-0.0262333	0.887653	0	1	0	1
ENSG00000086288	NME8	protein_coding	Q8N427	NA	NA	NA	NA	0	0	0	0
ENSG00000086289	EPDR1	protein_coding	Q9UM22	1.0005	0.0187155	0.472846	NA	1	1	0	1
ENSG00000086300	SNX10	protein_coding	Q9Y5X0	0.992724	1.26113e-12	-0.0281055	0.914498	1	0	0	1
ENSG00000086475	SEPHS1	protein_coding	P49903	0.992534	3.75637e-14	-0.137491	0.403305	1	0	0	1
ENSG00000086504	MRPL28	protein_coding	Q13084	0.712965	3.33318e-11	-0.0849208	0.590769	0	0	1	0
ENSG00000086506	HBQ1	protein_coding	P09105	0.123452	0.875129	0.347582	NA	0	1	0	1
ENSG00000086544	ITPKC	protein_coding	Q96DU7	-0.106355	0.6974	0.164757	0.564783	0	0	0	0
ENSG00000086548	CEACAM6	protein_coding	P40199	NA	NA	NA	NA	1	0	0	1
ENSG00000086570	FAT2	protein_coding	Q9NYQ8	-0.583095	NA	1.99253	NA	1	0	0	1
ENSG00000086589	RBM22	protein_coding	Q9NW64	0.218331	0.0300042	-0.311322	0.00218141	0	0	0	0
ENSG00000086598	TMED2	protein_coding	Q15363	-0.513682	1.18806e-06	-0.105671	0.521334	1	1	0	1
ENSG00000086619	ERO1B	protein_coding	Q86YB8	0.252456	0.0662372	0.156339	0.359914	1	1	0	1
ENSG00000086666	ZFAND6	protein_coding	Q6FIF0	-0.384497	0.00311123	-0.477131	0.000962923	0	0	0	0
ENSG00000086696	HSD17B2	protein_coding	P37059	NA	NA	NA	NA	1	1	0	1
ENSG00000086712	TXLNG	protein_coding	Q9NUQ3	-0.39415	8.54943e-05	-0.124134	0.402438	0	0	0	0
ENSG00000086717	PPEF1	protein_coding	O14829	-0.741374	0.454543	-0.28936	NA	0	1	0	1
ENSG00000086730	LAT2	protein_coding	Q9GZY6	-0.020189	0.97693	0.549191	NA	1	1	0	1
ENSG00000086758	HUWE1	protein_coding	Q7Z6Z7	-0.171886	0.0328309	0.0695925	0.517589	1	0	0	1
ENSG00000086827	ZW10	protein_coding	O43264	-0.582195	9.27099e-09	0.0903474	0.587691	1	1	0	1
ENSG00000086848	ALG9	protein_coding	Q9H6U8	-0.100122	0.883834	2.67993e-05	NA	1	1	0	1
ENSG00000086967	MYBPC2	protein_coding	Q14324	0.619191	NA	-0.338498	NA	0	0	0	0
ENSG00000086991	NOX4	protein_coding	Q9NPH5	NA	NA	-1.02551	NA	1	0	0	1
ENSG00000087008	ACOX3	protein_coding	O15254	0.0538534	0.838556	-0.0638833	0.816025	1	1	1	1
ENSG00000087053	MTMR2	protein_coding	Q13614	-0.203857	0.188176	0.00742241	0.978709	0	1	0	1
ENSG00000087074	PPP1R15A	protein_coding	O75807	0.333626	0.00569239	-0.386859	0.00279498	1	1	0	1
ENSG00000087076	HSD17B14	protein_coding	Q9BPX1	0.503552	0.428459	-0.458507	NA	0	0	0	0
ENSG00000087077	TRIP6	protein_coding	Q15654	0.7398	1.23489e-10	0.1452	0.353726	1	1	0	1
ENSG00000087085	ACHE	protein_coding	P22303	1.12792	2.45077e-05	0.448472	0.139463	1	1	0	1
ENSG00000087086	FTL	protein_coding	P02792	1.15167	2.15447e-26	-0.664707	6.73746e-10	1	0	0	1
ENSG00000087087	SRRT	protein_coding	Q9BXP5	0.165278	0.0986091	-0.0404274	0.759011	0	0	0	0
ENSG00000087088	BAX	protein_coding	Q07812	0.234577	0.0594628	-0.08984	0.576023	1	0	1	0
ENSG00000087095	NLK	protein_coding	Q9UBE8	-0.406424	0.291935	0.0679292	NA	0	1	0	1
ENSG00000087111	PIGS	protein_coding	Q96S52	0.519693	8.82973e-08	0.255619	0.0333779	1	0	0	1
ENSG00000087116	ADAMTS2	protein_coding	O95450	0.152442	0.848022	0.136796	NA	1	1	0	1
ENSG00000087128	TMPRSS11E	protein_coding	Q9UL52	NA	NA	NA	NA	1	0	0	1
ENSG00000087152	ATXN7L3	protein_coding	Q14CW9	-0.0278643	0.901529	0.263268	0.137625	0	1	0	1
ENSG00000087157	PGS1	protein_coding	Q32NB8	0.350592	0.0708521	0.314543	0.172472	1	1	1	1
ENSG00000087191	PSMC5	protein_coding	P62195	0.0331446	0.799864	0.00821061	0.965038	1	1	0	1
ENSG00000087206	UIMC1	protein_coding	Q96RL1	0.0727555	0.678652	0.046111	0.835576	0	0	0	0
ENSG00000087237	CETP	protein_coding	P11597	1.05409	0.500191	3.85378	NA	1	1	0	1
ENSG00000087245	MMP2	protein_coding	P08253	0.633881	0.185762	0.0857155	NA	1	1	0	1
ENSG00000087250	MT3	protein_coding	P25713	NA	NA	NA	NA	1	0	0	1
ENSG00000087253	LPCAT2	protein_coding	Q7L5N7	-0.231342	0.477537	-0.258161	NA	1	1	0	1
ENSG00000087258	GNAO1	protein_coding	P09471	0.168394	0.798455	0.411068	NA	1	0	0	1
ENSG00000087263	OGFOD1	protein_coding	Q8N543	-0.530553	1.65895e-06	-0.418169	0.000618055	0	0	0	0
ENSG00000087266	SH3BP2	protein_coding	P78314	0.297688	0.230221	0.293631	0.267445	0	0	0	0
ENSG00000087269	NOP14	protein_coding	P78316	0.294992	0.00137729	-0.116826	0.33576	1	0	0	1
ENSG00000087274	ADD1	protein_coding	P35611	-0.0391047	0.781614	-0.0772732	0.58293	1	1	0	1
ENSG00000087299	L2HGDH	protein_coding	Q9H9P8	-0.093888	0.703958	-0.218448	0.337656	1	0	1	0
ENSG00000087301	TXNDC16	protein_coding	Q9P2K2	-0.736817	5.72305e-07	0.0101655	0.977341	1	0	0	1
ENSG00000087302	C14orf166	protein_coding	#N/A	-0.299953	0.00864236	-0.306765	0.0126345	0	0	0	0
ENSG00000087303	NID2	protein_coding	Q14112	1.10027	1.71474e-14	0.575769	0.00127636	1	1	0	1
ENSG00000087338	GMCL1	protein_coding	Q96IK5	-0.480466	0.0120567	0.243927	0.383535	0	0	0	0
ENSG00000087365	SF3B2	protein_coding	Q13435	-0.00316022	0.982382	-0.199813	0.0509309	0	0	0	0
ENSG00000087448	KLHL42	protein_coding	Q9P2K6	-0.0217043	0.95231	0.301021	0.323492	0	0	0	0
ENSG00000087460	GNAS	protein_coding	Q5JWF2	-0.0409966	0.739089	-0.251356	0.00539414	1	1	0	1
ENSG00000087470	DNM1L	protein_coding	O00429	-0.571309	2.42251e-08	-0.0439261	0.817643	1	1	1	1
ENSG00000087494	PTHLH	protein_coding	P12272	0.906336	0.414327	-0.466327	NA	1	1	0	1
ENSG00000087495	PHACTR3	protein_coding	Q96KR7	-0.237864	0.883034	-0.449646	NA	0	0	0	0
ENSG00000087502	ERGIC2	protein_coding	Q96RQ1	-0.726435	6.94371e-06	0.282265	0.279579	1	1	0	1
ENSG00000087510	TFAP2C	protein_coding	Q92754	0.358352	0.369541	0.0122807	NA	0	0	0	0
ENSG00000087586	AURKA	protein_coding	O14965	0.468002	1.04594e-06	-0.0660377	0.671548	0	0	0	0
ENSG00000087589	CASS4	protein_coding	Q9NQ75	-0.787738	0.260219	0.159316	NA	1	0	0	1
ENSG00000087842	PIR	protein_coding	O00625	0.286574	0.224747	-0.361591	0.110486	0	0	0	0
ENSG00000087884	AAMDC	protein_coding	Q9H7C9	-0.287148	0.282958	-0.192293	0.557508	0	0	0	0
ENSG00000087903	RFX2	protein_coding	P48378	0.503866	0.0438773	0.276284	0.385347	0	1	0	1
ENSG00000087995	METTL2A	protein_coding	Q96IZ6	-0.536758	0.00229768	-0.143678	0.595112	0	0	0	0
ENSG00000088002	SULT2B1	protein_coding	O00204	0.64999	0.367916	0.0854735	NA	1	1	0	1
ENSG00000088035	ALG6	protein_coding	Q9Y672	0.107859	0.443171	0.25843	0.0624195	1	1	0	1
ENSG00000088038	CNOT3	protein_coding	O75175	-1.52586	NA	-1.7843	NA	0	0	0	0
ENSG00000088053	GP6	protein_coding	Q9HCN6	NA	NA	NA	NA	1	1	0	1
ENSG00000088179	PTPN4	protein_coding	P29074	-0.468527	0.0711944	0.137908	NA	0	1	1	1
ENSG00000088205	DDX18	protein_coding	Q9NVP1	-0.679507	1.16273e-11	-0.17673	0.162955	1	0	0	1
ENSG00000088247	KHSRP	protein_coding	Q92945	0.325811	1.26068e-05	-0.104407	0.300757	1	0	0	1
ENSG00000088256	GNA11	protein_coding	P29992	0.37466	0.00877352	0.10806	0.584749	1	0	0	1
ENSG00000088280	ASAP3	protein_coding	Q8TDY4	NA	NA	NA	NA	0	1	0	1
ENSG00000088298	EDEM2	protein_coding	Q9BV94	0.267695	0.133969	0.0614605	0.816025	1	1	0	1
ENSG00000088305	DNMT3B	protein_coding	Q9UBC3	0.0770071	0.751646	-0.155851	0.506665	0	1	0	1
ENSG00000088320	REM1	protein_coding	O75628	NA	NA	-2.48593	NA	1	0	0	1
ENSG00000088325	TPX2	protein_coding	Q9ULW0	-0.0774404	0.532354	-0.241344	0.0147816	0	0	0	0
ENSG00000088340	FER1L4	transcribed_unitary_pseudogene	A9Z1Z3	-0.101808	0.916243	-0.233851	NA	1	0	0	1
ENSG00000088356	PDRG1	protein_coding	Q9NUG6	0.37575	0.00122341	-0.476027	3.86655e-05	0	0	0	0
ENSG00000088367	EPB41L1	protein_coding	Q9H4G0	0.410364	0.117108	-0.151096	0.630821	1	1	0	1
ENSG00000088386	SLC15A1	protein_coding	P46059	1.2355	NA	-0.379307	NA	1	0	0	1
ENSG00000088387	DOCK9	protein_coding	Q9BZ29	-0.434467	0.0103525	0.0887993	0.765884	1	0	0	1
ENSG00000088448	ANKRD10	protein_coding	Q9NXR5	-0.435926	0.0047464	0.277348	0.248668	0	0	0	0
ENSG00000088451	TGDS	protein_coding	O95455	-0.583031	3.96791e-06	-0.147206	0.422615	0	0	0	0
ENSG00000088538	DOCK3	protein_coding	Q8IZD9	-0.272214	0.10353	0.410773	0.0339971	0	0	0	0
ENSG00000088543	C3orf18	protein_coding	Q9UK00	-0.185112	0.7919	-0.289116	NA	1	0	0	1
ENSG00000088682	COQ9	protein_coding	O75208	0.131474	0.547291	0.154241	0.53815	0	0	1	0
ENSG00000088726	TMEM40	protein_coding	Q8WWA1	1.0649	NA	1.03014	NA	1	0	0	1
ENSG00000088727	KIF9	protein_coding	Q9HAQ2	0.122753	0.725695	0.0443038	0.920884	1	0	0	1
ENSG00000088756	ARHGAP28	protein_coding	Q9P2N2	-0.0670142	0.936344	-0.249839	NA	0	1	0	1
ENSG00000088766	CRLS1	protein_coding	Q9UJA2	-0.381387	0.0468108	0.191981	0.485567	1	0	1	0
ENSG00000088782	DEFB127	protein_coding	Q9H1M4	NA	NA	NA	NA	1	1	0	1
ENSG00000088808	PPP1R13B	protein_coding	Q96KQ4	0.129612	0.535679	0.0706674	0.783303	1	0	0	1
ENSG00000088812	ATRN	protein_coding	O75882	-0.0179618	0.93194	0.302201	0.0459481	1	0	0	1
ENSG00000088826	SMOX	protein_coding	Q9NWM0	0.218417	0.596978	0.224284	NA	0	1	0	1
ENSG00000088827	SIGLEC1	protein_coding	Q9BZZ2	1.84345	NA	0.837828	NA	1	0	0	1
ENSG00000088832	FKBP1A	protein_coding	P62942	0.798812	3.58789e-08	-0.265923	0.116308	1	0	0	1
ENSG00000088833	NSFL1C	protein_coding	Q9UNZ2	0.349475	0.00477712	-0.234483	0.0827882	1	1	0	1
ENSG00000088836	SLC4A11	protein_coding	Q8NBS3	0.118405	0.793219	-0.0292734	NA	1	1	0	1
ENSG00000088854	C20orf194	protein_coding	Q5TEA3	-0.348681	0.0383367	0.0822228	0.766437	0	0	0	0
ENSG00000088876	ZNF343	protein_coding	Q6P1L6	-0.21999	0.516044	0.204491	NA	0	0	0	0
ENSG00000088881	EBF4	protein_coding	Q9BQW3	1.18366	0.00646371	0.130018	NA	0	0	0	0
ENSG00000088882	CPXM1	protein_coding	Q96SM3	0.881098	NA	1.79996	NA	1	1	0	1
ENSG00000088888	MAVS	protein_coding	Q7Z434	-0.0344393	0.880731	-0.0155601	0.956178	1	0	1	0
ENSG00000088899	LZTS3	protein_coding	O60299	0.229273	0.42931	0.248125	0.412482	0	1	0	1
ENSG00000088926	F11	protein_coding	P03951	0.940271	NA	0.898042	NA	1	1	0	1
ENSG00000088930	XRN2	protein_coding	Q9H0D6	-0.590483	2.84792e-10	-0.11611	0.427182	1	0	0	1
ENSG00000088970	KIZ	protein_coding	Q2M2Z5	-0.334676	0.074168	-0.128778	0.626743	0	0	0	0
ENSG00000088986	DYNLL1	protein_coding	P63167	-0.201977	0.115964	-0.221035	0.117224	1	0	0	1
ENSG00000088992	TESC	protein_coding	Q96BS2	0.577704	0.0897836	0.282989	NA	1	0	0	1
ENSG00000089006	SNX5	protein_coding	Q9Y5X3	0.22488	0.00673519	-0.235077	0.00966458	0	0	0	0
ENSG00000089009	RPL6	protein_coding	Q02878	-0.479031	0.117795	-0.502148	0.136715	1	0	0	1
ENSG00000089012	SIRPG	protein_coding	Q9P1W8	NA	NA	NA	NA	1	0	0	1
ENSG00000089022	MAPKAPK5	protein_coding	Q8IW41	-0.455739	0.0257752	0.169954	0.622411	0	0	0	0
ENSG00000089041	P2RX7	protein_coding	Q99572	-0.128291	NA	0.769518	NA	1	1	0	1
ENSG00000089048	ESF1	protein_coding	Q9H501	-0.519194	5.92819e-07	-0.139565	0.359308	1	0	0	1
ENSG00000089050	RBBP9	protein_coding	O75884	0.228198	0.533718	0.254189	NA	0	0	0	0
ENSG00000089053	ANAPC5	protein_coding	Q9UJX4	0.446679	8.75986e-09	0.0802364	0.478928	0	0	0	0
ENSG00000089057	SLC23A2	protein_coding	Q9UGH3	0.360881	0.0129077	0.121112	0.519933	1	1	0	1
ENSG00000089060	SLC8B1	protein_coding	Q6J4K2	0.299746	0.339523	0.366891	NA	1	1	0	1
ENSG00000089063	TMEM230	protein_coding	Q96A57	0.401286	0.0594164	0.112359	0.670741	1	1	0	1
ENSG00000089091	DZANK1	protein_coding	Q9NVP4	-0.366955	0.34021	0.19555	NA	0	0	0	0
ENSG00000089094	KDM2B	protein_coding	Q8NHM5	-0.291198	0.0754961	0.326165	0.110521	0	0	0	0
ENSG00000089101	CFAP61	protein_coding	Q8NHU2	-0.338588	0.844511	-0.0483293	NA	0	0	0	0
ENSG00000089116	LHX5	protein_coding	Q9H2C1	0.940271	NA	-0.0637281	NA	0	0	0	0
ENSG00000089123	TASP1	protein_coding	Q9H6P5	-0.0954913	0.807864	0.231954	NA	0	1	0	1
ENSG00000089127	OAS1	protein_coding	P00973	-0.983282	NA	-1.80916	NA	1	0	0	1
ENSG00000089154	GCN1	protein_coding	Q92616	0.146048	0.108732	0.36512	2.78077e-05	1	0	0	1
ENSG00000089157	RPLP0	protein_coding	P05388	0.601612	5.83257e-13	-0.0274716	0.866716	1	1	0	1
ENSG00000089159	PXN	protein_coding	P49023	0.582411	0.000179805	0.0266373	0.933365	1	0	0	1
ENSG00000089163	SIRT4	protein_coding	Q9Y6E7	-0.0017651	0.997669	0.0916289	NA	0	0	1	0
ENSG00000089169	RPH3A	protein_coding	Q9Y2J0	-2.43658	NA	-1.02551	NA	1	0	0	1
ENSG00000089177	KIF16B	protein_coding	Q96L93	-0.127136	0.457597	0.0721507	0.748173	1	0	0	1
ENSG00000089195	TRMT6	protein_coding	Q9UJA5	-0.182006	0.152751	-0.0223893	0.919342	0	0	0	0
ENSG00000089199	CHGB	protein_coding	P05060	0.290561	0.729758	0.482756	NA	1	1	0	1
ENSG00000089220	PEBP1	protein_coding	P30086	0.910009	4.40555e-27	-0.220154	0.0389163	1	1	0	1
ENSG00000089225	TBX5	protein_coding	Q99593	NA	NA	NA	NA	0	0	0	0
ENSG00000089234	BRAP	protein_coding	Q7Z569	-0.16226	0.28685	-0.301205	0.041775	0	0	0	0
ENSG00000089248	ERP29	protein_coding	P30040	0.739961	1.87084e-13	-0.126101	0.329547	1	1	0	1
ENSG00000089250	NOS1	protein_coding	P29475	-0.983282	NA	-1.02551	NA	1	1	0	1
ENSG00000089280	FUS	protein_coding	P35637	-0.0738208	0.597564	-0.391567	0.000726857	0	0	0	0
ENSG00000089289	IGBP1	protein_coding	P78318	0.12133	0.550488	-0.0415888	0.875834	0	0	0	0
ENSG00000089327	FXYD5	protein_coding	Q96DB9	1.14749	2.68714e-15	-0.113479	0.667681	1	1	0	1
ENSG00000089335	ZNF302	protein_coding	Q9NR11	-0.451764	0.0842613	0.043443	0.930837	0	1	0	1
ENSG00000089351	GRAMD1A	protein_coding	Q96CP6	0.0704312	0.662948	0.265182	0.0536054	1	1	0	1
ENSG00000089356	FXYD3	protein_coding	Q14802	1.50807	NA	2.4327	NA	1	1	0	1
ENSG00000089472	HEPH	protein_coding	Q9BQS7	NA	NA	-1.02551	NA	1	1	0	1
ENSG00000089486	CDIP1	protein_coding	Q9H305	0.878924	0.129393	0.229561	NA	0	0	0	0
ENSG00000089505	CMTM1	protein_coding	Q8IZ96	-0.469763	NA	0.0713909	NA	1	0	0	1
ENSG00000089558	KCNH4	protein_coding	Q9UQ05	-0.13047	0.924146	0.393488	NA	1	0	0	1
ENSG00000089597	GANAB	protein_coding	Q14697	0.715558	1.50104e-24	0.277481	0.000516604	1	1	0	1
ENSG00000089639	GMIP	protein_coding	Q9P107	0.17249	0.527713	0.0234378	0.951487	1	1	0	1
ENSG00000089682	RBM41	protein_coding	Q96IZ5	-0.297581	0.0587272	0.152119	0.461649	0	0	0	0
ENSG00000089685	BIRC5	protein_coding	O15392	0.137208	0.245324	-0.126356	0.324085	0	0	0	0
ENSG00000089692	LAG3	protein_coding	P18627	-0.500335	NA	-1.54069	NA	1	1	0	1
ENSG00000089693	MLF2	protein_coding	Q15773	0.0268478	0.869571	0.105873	0.485612	1	1	0	1
ENSG00000089723	OTUB2	protein_coding	Q96DC9	-1.8992	NA	NA	NA	0	0	0	0
ENSG00000089737	DDX24	protein_coding	Q9GZR7	0.983894	0.216355	0.313314	NA	1	0	0	1
ENSG00000089775	ZBTB25	protein_coding	P24278	-0.314884	0.214222	0.243204	0.470212	0	0	0	0
ENSG00000089818	NECAP1	protein_coding	Q8NC96	0.189094	0.186574	-0.138669	0.393937	1	1	0	1
ENSG00000089820	ARHGAP4	protein_coding	P98171	0.53829	0.347029	0.995244	NA	1	0	0	1
ENSG00000089847	ANKRD24	protein_coding	#N/A	0.793589	0.0357915	0.410537	NA	0	0	0	0
ENSG00000089876	DHX32	protein_coding	Q7L7V1	-0.5888	0.00152198	0.286549	0.269711	0	0	0	0
ENSG00000089902	RCOR1	protein_coding	Q9UKL0	-0.119224	0.534741	-0.332665	0.0326471	0	1	0	1
ENSG00000089916	GPATCH2L	protein_coding	Q9NWQ4	-0.349287	0.0266966	-0.0792263	0.721753	0	0	0	0
ENSG00000090006	LTBP4	protein_coding	Q8N2S1	0.626755	8.6825e-06	0.523616	0.00149123	1	1	0	1
ENSG00000090013	BLVRB	protein_coding	P30043	0.760854	5.11657e-09	-0.18451	0.250375	1	1	0	1
ENSG00000090020	SLC9A1	protein_coding	P19634	0.248444	0.244057	0.443304	0.0325817	1	1	0	1
ENSG00000090054	SPTLC1	protein_coding	O15269	-0.271196	0.00639188	0.0663512	0.65539	1	1	0	1
ENSG00000090060	PAPOLA	protein_coding	P51003	-0.737101	6.25875e-10	-0.00151641	0.996133	0	0	0	0
ENSG00000090061	CCNK	protein_coding	O75909	0.962632	5.44882e-13	0.0332107	0.878682	0	0	0	0
ENSG00000090097	PCBP4	protein_coding	P57723	0.639429	0.0834991	-0.234486	NA	0	0	0	0
ENSG00000090104	RGS1	protein_coding	Q08116	NA	NA	NA	NA	1	0	0	1
ENSG00000090238	YPEL3	protein_coding	P61236	0.503585	0.00680793	-0.29098	0.180137	0	0	0	0
ENSG00000090263	MRPS33	protein_coding	Q9Y291	-0.0728893	0.607394	-0.364476	0.000927917	0	0	1	0
ENSG00000090266	NDUFB2	protein_coding	O95178	0.154578	0.21371	-0.20083	0.0870902	0	0	1	0
ENSG00000090273	NUDC	protein_coding	Q9Y266	0.0594414	0.691852	-0.175554	0.181108	0	0	0	0
ENSG00000090316	MAEA	protein_coding	Q7L5Y9	0.287586	0.00967318	-0.266285	0.0246547	1	0	0	1
ENSG00000090339	ICAM1	protein_coding	P05362	-0.423914	0.790382	1.72199	NA	1	1	0	1
ENSG00000090372	STRN4	protein_coding	Q9NRL3	1.25713	1.16956e-30	0.440136	0.000403609	1	0	0	1
ENSG00000090376	IRAK3	protein_coding	Q9Y616	0.674213	NA	1.02495	NA	1	1	0	1
ENSG00000090382	LYZ	protein_coding	P61626	NA	NA	NA	NA	1	1	0	1
ENSG00000090402	SI	protein_coding	P14410	-1.06301	NA	0.898042	NA	1	0	0	1
ENSG00000090432	MUL1	protein_coding	Q969V5	0.364904	0.0369589	-0.0107187	0.973768	1	0	1	0
ENSG00000090447	TFAP4	protein_coding	Q01664	0.779074	3.62827e-07	-0.0294094	0.912607	0	0	0	0
ENSG00000090470	PDCD7	protein_coding	Q8N8D1	0.371405	0.0518396	-0.0217414	0.946756	0	1	0	1
ENSG00000090487	SPG21	protein_coding	Q9NZD8	0.626694	0.000191592	0.140884	0.583322	1	1	0	1
ENSG00000090512	FETUB	protein_coding	Q9UGM5	-1.85183	NA	NA	NA	1	1	0	1
ENSG00000090520	DNAJB11	protein_coding	Q9UBS4	0.124531	0.350571	-0.0053761	0.981303	1	1	0	1
ENSG00000090530	P3H2	protein_coding	Q8IVL5	0.0233194	0.976253	-0.270355	NA	1	1	0	1
ENSG00000090534	THPO	protein_coding	P40225	-0.666763	NA	-2.10607	NA	1	1	0	1
ENSG00000090539	CHRD	protein_coding	Q9H2X0	0.875784	0.159703	0.708623	NA	1	1	0	1
ENSG00000090554	FLT3LG	protein_coding	P49771	-0.108099	0.946028	1.52983	NA	1	0	0	1
ENSG00000090565	RAB11FIP3	protein_coding	O75154	-0.285208	NA	-0.4354	NA	1	1	0	1
ENSG00000090581	GNPTG	protein_coding	Q9UJJ9	1.01978	1.40687e-07	0.119915	0.666553	1	1	0	1
ENSG00000090612	ZNF268	protein_coding	Q14587	-1.04815	0.00152198	-0.215751	NA	0	0	0	0
ENSG00000090615	GOLGA3	protein_coding	Q08378	0.141284	0.273239	0.385202	0.00149818	1	1	0	1
ENSG00000090621	PABPC4	protein_coding	Q13310	0.00343925	0.982769	0.10714	0.428716	0	0	0	0
ENSG00000090659	CD209	protein_coding	Q9NNX6	-0.652205	0.190667	-0.585272	NA	1	0	0	1
ENSG00000090661	CERS4	protein_coding	Q9HA82	0.254285	0.53357	-0.287092	NA	1	1	0	1
ENSG00000090674	MCOLN1	protein_coding	Q9GZU1	0.666276	0.000564925	0.144201	0.601311	1	1	0	1
ENSG00000090686	USP48	protein_coding	Q86UV5	0.089371	0.465347	-0.0555392	0.72263	0	0	0	0
ENSG00000090776	EFNB1	protein_coding	P98172	0.0618189	0.860602	0.0486725	0.905585	1	1	0	1
ENSG00000090857	PDPR	protein_coding	Q8NCN5	-0.0450886	0.868028	-0.0965074	0.704847	0	0	1	0
ENSG00000090861	AARS	protein_coding	P49588	0.579797	5.62933e-14	-0.104045	0.353301	1	0	0	1
ENSG00000090863	GLG1	protein_coding	Q92896	0.589587	4.91659e-14	0.328959	0.000474697	1	1	0	1
ENSG00000090889	KIF4A	protein_coding	O95239	-0.438139	2.1299e-05	-0.263135	0.0407656	1	0	0	1
ENSG00000090905	TNRC6A	protein_coding	Q8NDV7	-0.398711	0.00143068	0.252785	0.156027	1	1	0	1
ENSG00000090924	PLEKHG2	protein_coding	Q9H7P9	0.123817	0.674366	0.210459	0.477	0	0	0	0
ENSG00000090932	DLL3	protein_coding	Q9NYJ7	0.567819	0.188083	0.125459	NA	1	1	0	1
ENSG00000090971	NAT14	protein_coding	Q8WUY8	0.68677	0.000326402	0.0955087	0.741837	1	0	0	1
ENSG00000090975	PITPNM2	protein_coding	Q9BZ72	0.406142	0.26882	0.524488	NA	1	1	0	1
ENSG00000090989	EXOC1	protein_coding	Q9NV70	-0.378913	0.0142605	-0.0437388	0.868005	1	1	0	1
ENSG00000091009	RBM27	protein_coding	Q9P2N5	-0.478802	0.0270506	-0.0277341	0.95124	0	0	0	0
ENSG00000091010	POU4F3	protein_coding	Q15319	2.25169	NA	3.17687	NA	0	0	0	0
ENSG00000091039	OSBPL8	protein_coding	Q9BZF1	-0.460649	8.45925e-05	-0.0686058	0.721638	1	1	0	1
ENSG00000091073	DTX2	protein_coding	Q86UW9	-0.045026	0.959834	0.326907	NA	0	0	0	0
ENSG00000091106	NLRC4	protein_coding	Q9NPP4	-0.123906	0.912787	1.71208	NA	0	0	0	0
ENSG00000091127	PUS7	protein_coding	Q96PZ0	-0.288783	0.0109414	0.0605938	0.76143	0	0	0	0
ENSG00000091128	LAMB4	protein_coding	A4D0S4	0.686628	NA	1.63512	NA	0	1	0	1
ENSG00000091129	NRCAM	protein_coding	Q92823	0.711095	7.33635e-06	0.291466	0.142743	1	1	0	1
ENSG00000091136	LAMB1	protein_coding	P07942	0.33336	0.00107499	0.424932	9.63119e-05	1	1	0	1
ENSG00000091137	SLC26A4	protein_coding	O43511	-0.351755	NA	-0.70872	NA	1	0	0	1
ENSG00000091138	SLC26A3	protein_coding	P40879	-0.0214983	NA	-0.860022	NA	1	0	0	1
ENSG00000091140	DLD	protein_coding	P09622	-0.232016	0.0251498	-0.0494698	0.738401	0	0	1	0
ENSG00000091157	WDR7	protein_coding	Q9Y4E6	-0.434671	0.0228613	0.140252	0.632591	0	0	0	0
ENSG00000091164	TXNL1	protein_coding	O43396	-0.184492	0.0845726	-0.285756	0.00816631	0	0	0	0
ENSG00000091181	IL5RA	protein_coding	Q01344	-1.35814	NA	-1.15839	NA	1	1	0	1
ENSG00000091262	ABCC6	protein_coding	O95255	NA	NA	NA	NA	1	1	0	1
ENSG00000091317	CMTM6	protein_coding	Q9NX76	0.0790243	0.68381	0.0949619	0.638278	1	0	0	1
ENSG00000091409	ITGA6	protein_coding	P23229	0.085768	0.64558	0.215062	0.247455	1	0	0	1
ENSG00000091428	RAPGEF4	protein_coding	Q8WZA2	-0.514754	0.132893	0.0959696	NA	1	0	0	1
ENSG00000091436	AC013461.1	protein_coding	#N/A	-0.457936	0.00513388	-0.332954	0.108273	0	0	0	0
ENSG00000091482	SMPX	protein_coding	Q9UHP9	NA	NA	-2.47163	NA	0	1	0	1
ENSG00000091483	FH	protein_coding	P07954	0.0689833	0.561538	-0.284696	0.0051414	0	0	1	0
ENSG00000091490	SEL1L3	protein_coding	Q68CR1	-0.142971	0.722065	0.394104	NA	1	0	0	1
ENSG00000091513	TF	protein_coding	P02787	0.255272	NA	-1.41502	NA	1	1	0	1
ENSG00000091527	CDV3	protein_coding	Q9UKY7	-0.32294	0.0018794	-0.140842	0.316732	1	1	0	1
ENSG00000091536	MYO15A	protein_coding	Q9UKN7	0.0175526	0.989609	0.744086	NA	0	0	0	0
ENSG00000091542	ALKBH5	protein_coding	Q6P6C2	-0.275081	0.0304417	0.0927505	0.603213	1	1	0	1
ENSG00000091583	APOH	protein_coding	P02749	NA	NA	NA	NA	1	1	0	1
ENSG00000091592	NLRP1	protein_coding	Q9C000	1.00663	1.21095e-06	-0.186554	0.48623	0	0	0	0
ENSG00000091622	PITPNM3	protein_coding	Q9BZ71	0.172768	0.748239	0.665564	NA	1	1	0	1
ENSG00000091640	SPAG7	protein_coding	O75391	0.49473	0.00261729	0.143675	0.525367	0	0	0	0
ENSG00000091651	ORC6	protein_coding	Q9Y5N6	0.3349	0.00152049	-0.465266	2.35127e-05	1	0	0	1
ENSG00000091656	ZFHX4	protein_coding	Q86UP3	-0.18843	0.249646	0.00411049	0.990107	0	0	0	0
ENSG00000091664	SLC17A6	protein_coding	Q9P2U8	NA	NA	NA	NA	1	0	0	1
ENSG00000091704	CPA1	protein_coding	P15085	1.84345	NA	0.837757	NA	1	1	0	1
ENSG00000091732	ZC3HC1	protein_coding	Q86WB0	-0.0669773	0.711452	0.00556546	0.98428	0	0	0	0
ENSG00000091831	ESR1	protein_coding	P03372	-3.48486	NA	NA	NA	1	1	0	1
ENSG00000091844	RGS17	protein_coding	Q9UGC6	-0.406097	0.479507	-0.306504	NA	1	1	0	1
ENSG00000091879	ANGPT2	protein_coding	O15123	-1.37498	NA	0.354446	NA	1	1	0	1
ENSG00000091947	TMEM101	protein_coding	Q96IK0	0.267769	0.0869702	0.066742	0.771517	1	1	0	1
ENSG00000091972	CD200	protein_coding	P41217	NA	NA	NA	NA	1	1	0	1
ENSG00000091986	CCDC80	protein_coding	Q76M96	0.213247	0.456075	-0.0988818	0.777664	0	1	0	1
ENSG00000092009	CMA1	protein_coding	P23946	0.940271	NA	0.898042	NA	1	1	0	1
ENSG00000092010	PSME1	protein_coding	Q06323	0.0381792	0.872058	-0.398131	0.00525975	0	0	0	0
ENSG00000092020	PPP2R3C	protein_coding	Q969Q6	-0.574159	0.000271264	-0.0828393	0.770438	1	1	0	1
ENSG00000092036	HAUS4	protein_coding	Q9H6D7	0.159153	0.461711	-0.64164	8.27618e-05	0	1	0	1
ENSG00000092051	JPH4	protein_coding	Q96JJ6	-0.66411	NA	0.798884	NA	1	0	0	1
ENSG00000092054	MYH7	protein_coding	P12883	-0.983282	NA	NA	NA	0	0	0	0
ENSG00000092067	CEBPE	protein_coding	Q15744	-0.983282	NA	NA	NA	0	0	0	0
ENSG00000092068	SLC7A8	protein_coding	Q9UHI5	0.149485	0.50496	0.0692548	0.802666	1	0	0	1
ENSG00000092094	OSGEP	protein_coding	Q9NPF4	0.150053	0.198758	0.0200583	0.915195	1	1	0	1
ENSG00000092096	SLC22A17.1	protein_coding	#N/A	0.336768	0.626481	0.135487	NA	0	0	0	0
ENSG00000092098	RNF31	protein_coding	Q96EP0	0.372743	0.156286	0.0691264	0.854613	0	0	0	0
ENSG00000092108	SCFD1	protein_coding	Q8WVM8	-0.464965	8.71019e-05	-0.051448	0.8075	1	0	0	1
ENSG00000092140	G2E3	protein_coding	Q7L622	-0.538678	0.000258357	0.222394	0.30023	0	1	0	1
ENSG00000092148	HECTD1	protein_coding	Q9ULT8	-0.370547	1.46969e-05	0.183658	0.12141	0	0	0	0
ENSG00000092199	HNRNPC	protein_coding	P07910	1.13012	8.34728e-28	-0.1469	0.341171	1	0	0	1
ENSG00000092200	RPGRIP1	protein_coding	Q96KN7	-0.94852	0.304862	0.153448	NA	0	0	0	0
ENSG00000092201	SUPT16H	protein_coding	Q9Y5B9	-0.577237	1.30647e-13	-0.253193	0.00724109	0	0	0	0
ENSG00000092203	TOX4	protein_coding	O94842	-0.284004	0.0534656	-0.24389	0.184319	0	1	0	1
ENSG00000092208	GEMIN2	protein_coding	O14893	-0.0614247	0.744903	-0.0142822	0.955189	0	0	0	0
ENSG00000092295	TGM1	protein_coding	P22735	0.290486	0.732237	1.45332	NA	1	0	0	1
ENSG00000092330	TINF2	protein_coding	Q9BSI4	0.557989	0.00389141	0.249603	0.299212	0	1	0	1
ENSG00000092345	DAZL	protein_coding	Q92904	NA	NA	NA	NA	0	0	0	0
ENSG00000092377	TBL1Y	protein_coding	Q9BQ87	0.718863	NA	0.206503	NA	0	0	0	0
ENSG00000092421	SEMA6A	protein_coding	Q9H2E6	-0.233182	0.280285	0.0027317	0.995197	1	1	0	1
ENSG00000092439	TRPM7	protein_coding	Q96QT4	-0.633188	3.41862e-07	-0.0133948	0.964825	1	0	0	1
ENSG00000092445	TYRO3	protein_coding	Q06418	0.647579	0.0102509	0.398934	0.172147	1	0	0	1
ENSG00000092470	WDR76	protein_coding	Q9H967	-0.132685	0.396577	-0.0819495	0.627936	0	0	0	0
ENSG00000092529	CAPN3	protein_coding	P20807	-0.633728	NA	-0.625048	NA	1	0	0	1
ENSG00000092531	SNAP23	protein_coding	O00161	-0.558186	1.43746e-05	-0.530646	0.000153942	1	1	0	1
ENSG00000092607	TBX15	protein_coding	Q96SF7	-0.977591	NA	0.898042	NA	0	0	0	0
ENSG00000092621	PHGDH	protein_coding	O43175	0.479585	1.09287e-09	-0.260886	0.0056398	0	1	0	1
ENSG00000092758	COL9A3	protein_coding	Q14050	0.759142	0.331465	0.374102	NA	1	1	0	1
ENSG00000092820	EZR	protein_coding	P15311	-0.0021224	0.989693	-0.37292	0.000348097	1	1	0	1
ENSG00000092841	MYL6	protein_coding	P60660	0.342906	0.00676183	-0.335368	0.0184729	1	0	0	1
ENSG00000092847	AGO1	protein_coding	Q9UL18	0.202219	0.22021	0.185498	0.304693	0	0	0	0
ENSG00000092850	TEKT2	protein_coding	Q9UIF3	-0.166917	0.874601	0.17397	NA	0	0	0	0
ENSG00000092853	CLSPN	protein_coding	Q9HAW4	-0.223764	0.0196569	-0.167317	0.135928	1	1	0	1
ENSG00000092871	RFFL	protein_coding	Q8WZ73	-0.773174	0.0538679	-0.0361787	NA	1	1	0	1
ENSG00000092929	UNC13D	protein_coding	Q70J99	-0.290664	0.777862	0.0978239	NA	1	1	0	1
ENSG00000092931	MFSD11	protein_coding	O43934	0.113745	0.54926	-0.00115727	0.997721	1	0	0	1
ENSG00000092964	DPYSL2	protein_coding	Q16555	0.334096	0.0226347	-0.366274	0.0178298	1	1	0	1
ENSG00000092969	TGFB2	protein_coding	P61812	-0.0376616	0.968566	0.0477847	NA	1	1	0	1
ENSG00000092978	GPATCH2	protein_coding	Q9NW75	-0.232584	0.0487351	-0.26468	0.0404957	0	0	0	0
ENSG00000093000	NUP50	protein_coding	Q9UKX7	-0.480073	0.00158696	0.188623	0.417393	0	0	0	0
ENSG00000093009	CDC45	protein_coding	O75419	0.62852	9.72931e-11	-0.143287	0.295758	0	1	0	1
ENSG00000093010	COMT	protein_coding	P21964	0.564673	1.20765e-06	0.185349	0.199234	1	1	1	1
ENSG00000093072	CECR1	protein_coding	#N/A	0.326686	NA	0.0762628	NA	0	1	0	1
ENSG00000093100	XXbac-B461K10.4	processed_transcript	#N/A	-0.983282	NA	NA	NA	0	0	0	0
ENSG00000093134	VNN3	protein_coding	Q9NY84	NA	NA	NA	NA	1	1	0	1
ENSG00000093144	ECHDC1	protein_coding	Q9NTX5	-0.181331	0.211186	-0.15137	0.375265	0	1	1	1
[truncated: 55,993 more rows]

## Sheet: Counts data
				ERM Tg Enrich Counts			ERM Tg Input Counts			NES Tg Enrich Counts
Ensemble Gene ID	Gene name	Gene type	UniprotID	Replicate 1	Replicate 2	Replicate 3	Replicate 1	Replicate 2	Replicate 3	Replicate 1	Replicate 2	Replicate 3
ENSG00000000003	TSPAN6	protein_coding	O43657	896	1266	1199	1528	1158	1272	1211	1071	954
ENSG00000000005	TNMD	protein_coding	Q9H2S6	8	6	5	3	4	2	4	5	0
ENSG00000000419	DPM1	protein_coding	O60762	978	1268	1250	1768	1235	1452	1528	1430	1095
ENSG00000000457	SCYL3	protein_coding	Q8IZE3	146	199	163	227	166	183	175	157	137
ENSG00000000460	C1orf112	protein_coding	#N/A	598	839	650	780	551	603	608	655	447
ENSG00000000938	FGR	protein_coding	P09769	0	0	0	0	0	0	0	0	1
ENSG00000000971	CFH	protein_coding	P08603	2	0	3	0	2	2	4	2	6
ENSG00000001036	FUCA2	protein_coding	Q9BTY2	458	667	516	616	479	567	490	454	397
ENSG00000001084	GCLC	protein_coding	P48506	364	508	421	609	424	503	413	338	297
ENSG00000001167	NFYA	protein_coding	P23511	222	334	313	418	281	314	368	303	263
ENSG00000001460	STPG1	protein_coding	Q5TH74	107	143	119	220	197	210	153	127	119
ENSG00000001461	NIPAL3	protein_coding	Q6P499	240	376	278	255	199	231	231	224	189
ENSG00000001497	LAS1L	protein_coding	Q9Y4W2	1525	1790	1819	2001	1536	1702	2073	2087	1763
ENSG00000001561	ENPP4	protein_coding	Q9Y6X5	223	430	387	503	310	390	299	325	211
ENSG00000001617	SEMA3F	protein_coding	Q13275	58	66	73	45	48	45	61	54	43
ENSG00000001626	CFTR	protein_coding	P13569	0	3	0	0	0	2	0	0	0
ENSG00000001629	ANKIB1	protein_coding	Q9P2G1	136	182	154	202	156	173	150	139	97
ENSG00000001630	CYP51A1	protein_coding	Q16850	91	137	97	50	53	45	106	98	97
ENSG00000001631	KRIT1	protein_coding	O00522	137	186	168	321	260	286	170	173	116
ENSG00000002016	RAD52	protein_coding	P43351	303	319	292	356	263	356	301	272	244
ENSG00000002079	MYH16	unitary_pseudogene	Q9H6N6	11	14	15	10	15	19	3	6	6
ENSG00000002330	BAD	protein_coding	Q92934	117	152	149	124	89	109	174	128	122
ENSG00000002549	LAP3	protein_coding	P28838	833	1134	1090	1086	859	986	1367	1324	1075
ENSG00000002586	CD99	protein_coding	P14209	1015	1553	1163	746	506	584	1230	1063	930
ENSG00000002587	HS3ST1	protein_coding	O14792	0	0	1	0	0	0	0	0	0
ENSG00000002726	AOC1	protein_coding	P19801	0	0	0	0	0	0	0	0	0
ENSG00000002745	WNT16	protein_coding	Q9UBV4	2	0	2	1	1	1	4	0	3
ENSG00000002746	HECW1	protein_coding	Q76N89	1	4	2	3	0	3	3	10	2
ENSG00000002822	MAD1L1	protein_coding	Q9Y6D9	527	687	568	451	349	390	606	523	474
ENSG00000002834	LASP1	protein_coding	Q14847	223	271	296	294	265	306	425	374	298
ENSG00000002919	SNX11	protein_coding	Q9Y5W9	201	326	276	186	198	211	245	248	189
ENSG00000002933	TMEM176A	protein_coding	Q96HP8	0	0	0	0	0	0	0	0	0
ENSG00000003056	M6PR	protein_coding	P20645	1136	1708	1260	1039	766	828	1327	1158	1148
ENSG00000003096	KLHL13	protein_coding	Q9P2N7	156	245	194	225	208	267	220	196	202
ENSG00000003137	CYP26B1	protein_coding	Q9NR63	33	36	52	39	33	34	50	37	26
ENSG00000003147	ICA1	protein_coding	Q05084	46	79	88	87	70	108	67	62	55
ENSG00000003249	DBNDD1	protein_coding	Q9H9R9	59	94	66	76	45	63	55	48	52
ENSG00000003393	ALS2	protein_coding	Q96Q42	243	270	246	342	312	305	225	266	223
ENSG00000003400	CASP10	protein_coding	Q92851	68	97	61	122	85	112	98	96	84
ENSG00000003402	CFLAR	protein_coding	O15519	161	236	206	167	146	181	146	175	125
ENSG00000003436	TFPI	protein_coding	P10646	63	81	79	106	68	78	64	63	52
ENSG00000003509	NDUFAF7	protein_coding	Q7L592	107	141	142	159	108	157	162	150	126
ENSG00000003756	RBM5	protein_coding	P52756	729	799	828	1071	824	960	803	687	634
ENSG00000003987	MTMR7	protein_coding	Q9Y216	51	68	38	51	22	37	51	71	58
ENSG00000003989	SLC7A2	protein_coding	P52569	268	396	271	334	251	263	291	268	220
ENSG00000004059	ARF5	protein_coding	P84085	2379	2961	2963	2191	1724	2283	3238	3153	2854
ENSG00000004139	SARM1	protein_coding	Q6SZW1	244	323	217	93	58	69	163	183	167
ENSG00000004142	POLDIP2	protein_coding	Q9Y2S7	967	1265	1161	1181	888	1072	1148	1090	1063
ENSG00000004399	PLXND1	protein_coding	Q9Y4D7	85	71	108	70	60	68	67	66	66
ENSG00000004455	AK2	protein_coding	P54819	792	1139	878	1082	949	987	1159	1038	860
ENSG00000004468	CD38	protein_coding	P28907	1	2	0	2	1	0	0	0	0
ENSG00000004478	FKBP4	protein_coding	Q02790	2060	2762	2361	2123	1632	1855	2930	2917	2381
ENSG00000004487	KDM1A	protein_coding	O60341	2082	2861	2552	2717	1911	2340	2581	2669	2234
ENSG00000004534	RBM6	protein_coding	P78332	798	959	863	1083	812	1045	880	758	612
ENSG00000004660	CAMKK1	protein_coding	Q8N5S9	184	200	224	186	152	177	197	176	138
ENSG00000004700	RECQL	protein_coding	P46063	722	826	822	1362	1021	1288	1036	962	783
ENSG00000004766	VPS50	protein_coding	Q96JG6	220	336	287	433	342	391	278	344	263
ENSG00000004776	HSPB6	protein_coding	O14558	14	12	13	12	9	15	14	10	21
ENSG00000004777	ARHGAP33	protein_coding	O14559	25	38	30	29	24	30	23	19	17
ENSG00000004779	NDUFAB1	protein_coding	O14561	3751	5652	5219	3942	2938	3599	5991	5731	5592
ENSG00000004799	PDK4	protein_coding	Q16654	17	27	10	27	18	13	25	19	19
ENSG00000004809	SLC22A16	protein_coding	Q86VW1	0	0	0	0	0	0	0	0	0
ENSG00000004838	ZMYND10	protein_coding	O75800	29	10	16	10	20	12	7	7	12
ENSG00000004846	ABCB5	protein_coding	Q2M3G0	2	2	0	1	0	0	0	0	0
ENSG00000004848	ARX	protein_coding	Q96QS3	2	0	2	1	0	0	0	5	1
ENSG00000004864	SLC25A13	protein_coding	Q9UJS0	1245	1694	1439	1741	1184	1426	1581	1321	1205
ENSG00000004866	ST7	protein_coding	Q9NRC1	105	139	110	125	86	120	97	106	83
ENSG00000004897	CDC27	protein_coding	P30260	623	874	661	783	608	740	665	608	533
ENSG00000004939	SLC4A1	protein_coding	P02730	3	2	0	2	1	4	0	2	2
ENSG00000004948	CALCR	protein_coding	P30988	3	1	2	2	1	3	0	5	1
ENSG00000004961	HCCS	protein_coding	P53701	378	429	386	507	341	362	423	350	321
ENSG00000004975	DVL2	protein_coding	O14641	624	798	692	765	579	667	700	680	570
ENSG00000005001	PRSS22	protein_coding	Q9GZN4	0	0	0	0	0	0	0	0	0
ENSG00000005007	UPF1	protein_coding	Q92900	2405	2870	2763	2639	1863	2420	3063	2963	2289
ENSG00000005020	SKAP2	protein_coding	O75563	528	606	603	515	343	383	684	548	559
ENSG00000005022	SLC25A5	protein_coding	P05141	3616	5216	5273	5723	3972	4518	6458	5892	4856
ENSG00000005059	MCUB	protein_coding	Q9NWR8	172	238	212	150	108	119	208	190	137
ENSG00000005073	HOXA11	protein_coding	P31270	159	291	243	337	320	352	193	206	214
ENSG00000005075	POLR2J	protein_coding	P52435	44	55	43	46	30	42	48	44	27
ENSG00000005100	DHX33	protein_coding	Q9H6R0	1013	1456	1224	1125	901	1052	1401	1238	1048
ENSG00000005102	MEOX1	protein_coding	P50221	4	2	4	0	3	3	1	2	3
ENSG00000005108	THSD7A	protein_coding	Q9UPZ6	6	7	4	6	6	11	4	10	3
ENSG00000005156	LIG3	protein_coding	P49916	672	849	749	651	562	586	682	684	555
ENSG00000005175	RPAP3	protein_coding	Q9H6T3	818	1136	995	1781	1323	1525	1193	1094	1039
ENSG00000005187	ACSM3	protein_coding	Q53FZ2	12	11	19	14	19	25	12	5	16
ENSG00000005189	AC004381.6	protein_coding	#N/A	174	311	215	357	298	341	267	241	228
ENSG00000005194	CIAPIN1	protein_coding	Q6FI81	616	805	768	778	522	576	857	699	683
ENSG00000005206	SPPL2B	protein_coding	Q8TCT7	184	197	228	145	88	118	120	153	102
ENSG00000005238	FAM214B	protein_coding	Q7L5A3	28	18	25	19	28	17	32	17	12
ENSG00000005243	COPZ2	protein_coding	Q9P299	14	11	11	2	6	15	0	11	4
ENSG00000005249	PRKAR2B	protein_coding	P31323	119	140	142	184	96	113	153	127	147
ENSG00000005302	MSL3	protein_coding	Q8N5Y2	242	299	273	424	289	399	377	375	257
ENSG00000005339	CREBBP	protein_coding	Q92793	1395	1821	1569	1985	1638	2016	1742	1851	1566
ENSG00000005379	TSPOAP1	protein_coding	O95153	5	3	3	1	2	0	1	1	2
ENSG00000005381	MPO	protein_coding	P05164	0	0	0	0	0	1	0	0	0
ENSG00000005421	PON1	protein_coding	P27169	0	0	0	0	0	0	0	0	0
ENSG00000005436	GCFC2	protein_coding	P16383	392	430	362	567	398	474	351	310	316
ENSG00000005448	WDR54	protein_coding	Q9H977	257	373	344	239	208	215	321	287	210
ENSG00000005469	CROT	protein_coding	Q9UKG9	68	122	88	110	87	93	96	80	57
ENSG00000005471	ABCB4	protein_coding	P21439	15	26	10	20	14	16	11	22	9
ENSG00000005483	KMT2E	protein_coding	Q8IZD2	226	298	252	473	361	433	288	238	241
ENSG00000005486	RHBDD2	protein_coding	Q6NTF9	166	199	206	160	126	195	193	128	126
ENSG00000005513	SOX8	protein_coding	P57073	12	41	31	23	6	22	31	27	5
ENSG00000005700	IBTK	protein_coding	Q9P2D0	1	6	2	3	2	1	0	2	1
ENSG00000005801	ZNF195	protein_coding	O14628	372	495	449	586	413	550	521	540	451
ENSG00000005810	MYCBP2	protein_coding	O75592	1239	1413	1202	1884	1480	1746	1219	987	932
ENSG00000005812	FBXL3	protein_coding	Q9UKT7	391	469	442	806	574	746	550	522	450
ENSG00000005844	ITGAL	protein_coding	P20701	2	6	3	1	0	1	2	3	1
ENSG00000005882	PDK2	protein_coding	Q15119	90	133	142	152	107	125	172	132	127
ENSG00000005884	ITGA3	protein_coding	P26006	86	103	93	85	53	83	73	76	62
ENSG00000005889	ZFX	protein_coding	P17010	539	739	712	1173	880	1069	698	687	520
ENSG00000005893	LAMP2	protein_coding	P13473	3342	4492	3947	4517	3236	3978	4251	3905	3268
ENSG00000005961	ITGA2B	protein_coding	P08514	25	38	39	35	22	25	25	35	21
ENSG00000005981	ASB4	protein_coding	Q9Y574	0	0	0	0	0	0	0	0	0
ENSG00000006007	GDE1	protein_coding	Q9NZC3	299	458	428	327	279	299	415	351	319
ENSG00000006015	C19orf60	protein_coding	#N/A	115	141	135	98	51	59	115	111	78
ENSG00000006016	CRLF1	protein_coding	O75462	6	8	21	7	9	10	7	4	3
ENSG00000006025	OSBPL7	protein_coding	Q9BZF2	37	44	30	32	25	30	44	27	28
ENSG00000006042	TMEM98	protein_coding	Q9Y2Y6	203	267	241	188	158	193	233	193	158
ENSG00000006047	YBX2	protein_coding	Q9Y2T7	16	4	5	4	5	3	3	9	9
ENSG00000006059	KRT33A	protein_coding	O76009	0	0	0	0	0	0	0	0	0
ENSG00000006062	MAP3K14	protein_coding	Q99558	80	115	90	81	79	108	82	106	65
ENSG00000006071	ABCC8	protein_coding	Q09428	18	25	24	21	10	17	22	17	11
ENSG00000006116	CACNG3	protein_coding	O60359	0	0	0	0	0	0	0	0	0
ENSG00000006118	TMEM132A	protein_coding	Q24JP5	198	302	262	157	149	123	249	228	166
ENSG00000006125	AP2B1	protein_coding	P63010	1643	2227	1994	2732	2048	2366	2425	2207	1904
ENSG00000006128	TAC1	protein_coding	P20366	32	37	26	43	35	39	34	28	13
ENSG00000006194	ZNF263	protein_coding	O14978	202	264	199	196	195	246	227	196	176
ENSG00000006210	CX3CL1	protein_coding	P78423	1	0	0	0	0	0	0	1	0
ENSG00000006282	SPATA20	protein_coding	Q8TB22	107	152	125	75	73	73	102	85	63
ENSG00000006283	CACNA1G	protein_coding	O43497	13	8	5	9	6	6	8	12	6
ENSG00000006327	TNFRSF12A	protein_coding	Q9NP84	195	249	223	113	85	109	224	182	198
ENSG00000006377	DLX6	protein_coding	P56179	20	42	38	30	31	36	39	34	31
ENSG00000006432	MAP3K9	protein_coding	P80192	136	165	154	166	142	180	141	120	113
ENSG00000006451	RALA	protein_coding	P11233	304	427	426	454	375	380	423	423	362
ENSG00000006453	BAIAP2L1	protein_coding	Q9UHR4	3492	3326	2432	3576	2331	3494	3871	3909	2930
ENSG00000006459	KDM7A	protein_coding	Q6ZMT4	412	510	423	607	453	525	475	503	406
ENSG00000006468	ETV1	protein_coding	P50549	3	12	14	11	9	9	15	11	13
ENSG00000006530	AGK	protein_coding	Q53H12	173	249	197	320	220	258	282	241	179
ENSG00000006534	ALDH3B1	protein_coding	P43353	11	16	16	13	6	11	12	10	9
ENSG00000006555	TTC22	protein_coding	#N/A	0	0	0	0	2	0	0	0	0
ENSG00000006576	PHTF2	protein_coding	Q8N3S3	147	183	164	290	236	271	166	136	131
ENSG00000006606	CCL26	protein_coding	Q9Y258	0	0	1	0	0	0	0	0	0
ENSG00000006607	FARP2	protein_coding	O94887	384	516	429	583	462	505	583	522	433
ENSG00000006611	USH1C	protein_coding	Q9Y6N9	15	27	32	16	10	5	22	27	24
ENSG00000006625	GGCT	protein_coding	O75223	349	479	396	511	402	440	536	493	358
ENSG00000006634	DBF4	protein_coding	Q9UBU7	226	303	298	428	311	349	373	303	217
ENSG00000006638	TBXA2R	protein_coding	P21731	12	5	10	8	3	2	10	6	10
ENSG00000006652	IFRD1	protein_coding	O00458	695	886	768	1346	915	1137	776	732	616
ENSG00000006659	LGALS14	protein_coding	Q8TCE9	0	0	0	0	0	0	0	0	0
ENSG00000006695	COX10	protein_coding	Q12887	106	126	107	157	140	124	95	85	75
ENSG00000006704	GTF2IRD1	protein_coding	Q9UHL9	181	221	192	196	128	140	247	206	161
ENSG00000006712	PAF1	protein_coding	Q8N7H5	1060	1152	1128	1194	824	1019	1189	1132	965
ENSG00000006715	VPS41	protein_coding	P49754	436	582	490	582	463	577	532	502	400
ENSG00000006740	ARHGAP44	protein_coding	Q17R89	41	57	67	70	53	65	53	45	45
ENSG00000006744	ELAC2	protein_coding	Q9BQ52	809	957	999	1046	780	973	972	839	790
ENSG00000006747	SCIN	protein_coding	Q9Y6U3	7	8	10	10	2	14	9	14	5
ENSG00000006756	ARSD	protein_coding	P51689	0	0	0	0	0	1	0	0	0
ENSG00000006757	PNPLA4	protein_coding	P41247	33	48	43	14	11	23	43	41	23
ENSG00000006788	MYH13	protein_coding	Q9UKX3	0	0	0	0	0	0	4	0	0
ENSG00000006831	ADIPOR2	protein_coding	Q86V24	742	1204	974	664	587	712	981	950	832
ENSG00000006837	CDKL3	protein_coding	Q8IVW4	6	35	26	25	28	26	26	51	30
ENSG00000007001	UPP2	protein_coding	O95045	0	0	0	1	1	0	0	0	0
ENSG00000007038	PRSS21	protein_coding	Q9Y6M0	0	1	0	0	0	0	1	0	0
ENSG00000007047	MARK4	protein_coding	Q96L34	124	132	123	83	76	95	102	97	69
ENSG00000007062	PROM1	protein_coding	O43490	1	1	0	1	0	2	1	0	0
ENSG00000007080	CCDC124	protein_coding	Q96CT7	945	1195	1117	708	552	605	1328	1169	998
ENSG00000007129	CEACAM21	protein_coding	Q3KPI0	0	0	0	0	0	0	0	0	0
ENSG00000007168	PAFAH1B1	protein_coding	P43034	651	825	703	1313	984	1190	837	770	644
ENSG00000007171	NOS2	protein_coding	P35228	8	15	14	7	13	10	5	15	12
ENSG00000007174	DNAH9	protein_coding	Q9NYC9	0	0	0	1	0	0	0	0	0
ENSG00000007202	KIAA0100	protein_coding	Q14667	906	989	694	848	747	898	537	512	542
ENSG00000007216	SLC13A2	protein_coding	Q13183	0	0	0	0	0	0	0	0	0
ENSG00000007237	GAS7	protein_coding	O60861	16	26	27	14	20	25	19	20	24
ENSG00000007255	TRAPPC6A	protein_coding	O75865	153	150	141	107	66	93	164	135	135
ENSG00000007264	MATK	protein_coding	P42679	80	100	94	70	50	51	61	76	66
ENSG00000007306	CEACAM7	protein_coding	Q14002	0	0	0	0	0	0	0	0	0
ENSG00000007312	CD79B	protein_coding	P40259	0	0	0	0	1	0	0	0	1
ENSG00000007314	SCN4A	protein_coding	P35499	34	25	13	26	14	27	15	14	10
ENSG00000007341	ST7L	protein_coding	Q8TDW4	199	231	231	307	190	238	225	194	162
ENSG00000007350	TKTL1	protein_coding	P51854	2	2	5	1	2	3	4	1	1
ENSG00000007372	PAX6	protein_coding	P26367	324	389	316	379	325	381	395	425	291
ENSG00000007376	RPUSD1	protein_coding	Q9UJJ7	445	551	448	326	295	321	479	395	337
ENSG00000007384	RHBDF1	protein_coding	Q96CC6	91	113	95	67	49	73	67	65	66
ENSG00000007392	LUC7L	protein_coding	Q9NQ29	660	807	762	629	486	490	882	694	660
ENSG00000007402	CACNA2D2	protein_coding	Q9NY47	164	232	190	161	110	139	149	164	101
ENSG00000007516	BAIAP3	protein_coding	O94812	19	22	20	22	15	19	22	20	12
ENSG00000007520	TSR3	protein_coding	Q9UJK0	224	250	218	125	82	110	205	160	167
ENSG00000007541	PIGQ	protein_coding	Q9BRB3	108	174	138	101	78	103	113	122	82
ENSG00000007545	CRAMP1	protein_coding	Q96RY5	89	104	93	115	92	114	87	77	59
ENSG00000007866	TEAD3	protein_coding	Q99594	50	76	77	98	55	65	60	65	86
ENSG00000007908	SELE	protein_coding	P16581	1	0	1	1	0	1	0	0	0
ENSG00000007923	DNAJC11	protein_coding	Q9NVH1	1840	2263	1874	1696	1275	1544	2076	2017	1735
ENSG00000007933	FMO3	protein_coding	P31513	0	0	0	0	0	0	0	0	0
ENSG00000007944	MYLIP	protein_coding	Q8WY64	71	95	123	160	90	116	98	105	77
ENSG00000007952	NOX1	protein_coding	Q9Y5S8	1	0	1	1	0	0	0	0	2
ENSG00000007968	E2F2	protein_coding	Q14209	0	0	1	0	0	0	0	0	0
ENSG00000008018	PSMB1	protein_coding	P20618	13564	21371	16711	12929	9319	12570	18436	20320	17369
ENSG00000008056	SYN1	protein_coding	P17600	27	55	29	49	22	37	39	39	51
ENSG00000008083	JARID2	protein_coding	Q92833	292	360	368	417	323	425	325	308	237
ENSG00000008086	CDKL5	protein_coding	O76039	36	52	60	79	68	65	50	62	40
ENSG00000008118	CAMK1G	protein_coding	Q96NX5	0	1	1	1	1	0	0	0	0
ENSG00000008128	CDK11A	protein_coding	Q9UQ88	18	9	18	11	7	5	11	6	12
ENSG00000008130	NADK	protein_coding	O95544	372	480	405	414	300	371	390	359	326
ENSG00000008196	TFAP2B	protein_coding	Q92481	0	0	0	0	0	0	0	0	1
ENSG00000008197	TFAP2D	protein_coding	Q7Z6R9	0	0	0	0	0	0	0	0	0
ENSG00000008226	DLEC1	protein_coding	Q9Y238	8	7	16	3	5	4	1	2	0
ENSG00000008256	CYTH3	protein_coding	O43739	164	195	174	181	153	175	170	130	139
ENSG00000008277	ADAM22	protein_coding	Q9P0K1	88	91	83	102	68	95	84	52	52
ENSG00000008282	SYPL1	protein_coding	Q16563	510	732	654	630	454	467	568	567	471
ENSG00000008283	CYB561	protein_coding	P49447	155	216	160	114	104	118	171	118	113
ENSG00000008294	SPAG9	protein_coding	O60271	1877	2087	1997	2430	1848	2165	2201	2095	1625
ENSG00000008300	CELSR3	protein_coding	Q9NYQ7	987	1079	945	766	654	848	714	711	623
ENSG00000008311	AASS	protein_coding	Q9UDR5	302	308	278	373	260	334	255	236	240
ENSG00000008323	PLEKHG6	protein_coding	Q3KR16	5	2	4	4	3	3	1	3	0
ENSG00000008324	SS18L2	protein_coding	Q9UHA2	272	325	264	257	201	256	270	277	178
ENSG00000008382	MPND	protein_coding	Q8N594	73	80	93	64	42	59	81	73	59
ENSG00000008394	MGST1	protein_coding	P10620	562	778	722	907	606	818	591	608	522
ENSG00000008405	CRY1	protein_coding	Q16526	412	509	411	524	374	454	414	372	357
ENSG00000008438	PGLYRP1	protein_coding	O75594	2	3	2	4	3	1	3	0	1
ENSG00000008441	NFIX	protein_coding	Q14938	128	192	135	155	116	151	124	151	110
ENSG00000008513	ST3GAL1	protein_coding	Q11201	24	44	38	24	28	30	24	15	22
ENSG00000008516	MMP25	protein_coding	Q9NPA2	1	9	1	4	2	12	8	9	0
ENSG00000008517	IL32	protein_coding	P24001	7	11	12	8	7	8	12	9	13
ENSG00000008710	PKD1	protein_coding	P98161	317	337	295	261	242	267	255	204	172
ENSG00000008735	MAPK8IP2	protein_coding	Q13387	488	590	542	520	318	478	501	586	425
ENSG00000008838	MED24	protein_coding	O75448	829	969	853	781	595	739	652	659	540
ENSG00000008853	RHOBTB2	protein_coding	Q9BYZ6	55	52	60	51	52	54	43	40	38
ENSG00000008869	HEATR5B	protein_coding	Q9P2D3	667	920	753	909	729	880	584	636	536
ENSG00000008952	SEC62	protein_coding	Q99442	1390	1679	1714	2233	1416	1893	1779	1646	1494
ENSG00000008988	RPS20	protein_coding	P60866	2939	3804	3171	2175	1700	2178	4128	3436	3349
ENSG00000009307	CSDE1	protein_coding	O75534	7658	9941	8974	10509	7905	9216	10429	10025	8601
ENSG00000009335	UBE3C	protein_coding	Q15386	799	894	828	1178	881	1012	688	637	602
ENSG00000009413	REV3L	protein_coding	O60673	384	449	344	584	479	571	302	317	223
ENSG00000009694	TENM1	protein_coding	Q9UKZ4	43	70	43	98	61	83	25	39	24
ENSG00000009709	PAX7	protein_coding	P23759	7	5	5	3	8	5	3	6	3
ENSG00000009724	MASP2	protein_coding	O00187	18	24	13	20	19	22	11	8	12
ENSG00000009765	IYD	protein_coding	Q6PHW0	0	0	0	0	1	2	1	0	0
ENSG00000009780	FAM76A	protein_coding	Q8TAV0	185	238	194	239	193	227	242	238	161
ENSG00000009790	TRAF3IP3	protein_coding	Q9Y228	2	3	1	3	1	5	0	2	1
ENSG00000009830	POMT2	protein_coding	Q9UKY4	207	256	267	190	167	213	177	195	148
ENSG00000009844	VTA1	protein_coding	Q9NP79	813	1158	970	1293	1009	1141	1203	1232	987
ENSG00000009950	MLXIPL	protein_coding	Q9NP71	53	49	31	59	51	64	56	44	33
ENSG00000009954	BAZ1B	protein_coding	Q9UIG0	3473	4277	3756	4395	3176	3824	4253	4004	3415
ENSG00000010017	RANBP9	protein_coding	Q96S59	701	960	797	837	719	745	913	884	777
ENSG00000010030	ETV7	protein_coding	Q9Y603	4	0	0	1	0	3	1	1	0
ENSG00000010072	SPRTN	protein_coding	Q9H040	518	723	628	974	638	768	809	706	688
ENSG00000010165	METTL13	protein_coding	Q8N6R0	464	627	502	428	311	362	516	468	376
ENSG00000010219	DYRK4	protein_coding	Q9NR20	61	123	81	142	134	159	112	93	82
ENSG00000010244	ZNF207	protein_coding	O43670	331	439	381	524	381	430	417	356	349
ENSG00000010256	UQCRC1	protein_coding	P31930	3173	3580	3536	3709	2806	3370	4437	3935	3347
ENSG00000010270	STARD3NL	protein_coding	O95772	387	506	398	409	337	421	368	370	374
ENSG00000010278	CD9	protein_coding	P21926	620	891	770	617	453	500	839	819	651
ENSG00000010282	HHATL	protein_coding	Q9HCP6	2	2	0	7	2	5	2	0	3
ENSG00000010292	NCAPD2	protein_coding	Q15021	2108	2873	2648	2448	1764	2147	2333	2281	1848
ENSG00000010295	IFFO1	protein_coding	Q0D2I5	463	546	437	286	210	272	387	371	328
ENSG00000010310	GIPR	protein_coding	P48546	8	35	23	12	9	13	22	21	19
ENSG00000010318	PHF7	protein_coding	Q9BWX1	33	47	48	53	47	54	45	52	35
ENSG00000010319	SEMA3G	protein_coding	Q9NS98	29	32	26	19	20	15	32	13	21
ENSG00000010322	NISCH	protein_coding	Q9Y2I1	870	1132	944	920	678	873	706	771	626
ENSG00000010327	STAB1	protein_coding	Q9NY15	2	5	2	4	2	2	4	4	1
ENSG00000010361	FUZ	protein_coding	Q9BT04	509	594	539	568	466	533	537	439	427
ENSG00000010379	SLC6A13	protein_coding	Q9NSD5	42	35	42	34	21	21	27	17	19
ENSG00000010404	IDS	protein_coding	P22304	75	108	90	151	156	148	66	69	65
ENSG00000010438	PRSS3	protein_coding	P35030	0	0	0	0	2	1	0	0	0
ENSG00000010539	ZNF200	protein_coding	P98182	582	699	636	600	365	570	819	940	774
ENSG00000010610	CD4	protein_coding	P01730	5	5	3	5	8	4	2	2	3
ENSG00000010626	LRRC23	protein_coding	Q53EV4	32	55	32	68	57	49	82	31	37
ENSG00000010671	BTK	protein_coding	Q06187	12	12	12	16	18	16	8	10	11
ENSG00000010704	HFE	protein_coding	Q30201	5	2	1	2	2	3	4	2	2
ENSG00000010803	SCMH1	protein_coding	Q96GD3	171	228	208	251	233	264	154	163	128
ENSG00000010810	FYN	protein_coding	P06241	799	1076	971	1144	829	1156	1016	1111	849
ENSG00000010818	HIVEP2	protein_coding	P31629	128	155	135	197	207	191	159	159	134
ENSG00000010932	FMO1	protein_coding	Q01740	0	0	0	1	0	2	0	0	1
ENSG00000011007	TCEB3	protein_coding	#N/A	405	533	595	702	539	611	635	606	558
ENSG00000011009	LYPLA2	protein_coding	O95372	119	154	121	90	70	65	116	117	106
ENSG00000011021	CLCN6	protein_coding	P51797	238	321	267	241	191	209	238	222	186
ENSG00000011028	MRC2	protein_coding	Q9UBG0	200	248	230	169	145	166	201	191	161
ENSG00000011052	NME1-NME2	protein_coding	#N/A	0	0	0	0	0	0	0	0	0
ENSG00000011083	SLC6A7	protein_coding	Q99884	0	0	0	0	0	0	0	0	0
ENSG00000011105	TSPAN9	protein_coding	O75954	69	90	112	90	71	73	76	74	83
ENSG00000011114	BTBD7	protein_coding	Q9P203	0	1	0	3	1	0	0	0	0
ENSG00000011132	APBA3	protein_coding	O96018	120	148	105	114	81	94	102	96	92
ENSG00000011143	MKS1	protein_coding	Q9NXB0	221	340	295	298	237	263	275	309	205
ENSG00000011198	ABHD5	protein_coding	Q8WTS1	180	209	188	275	193	254	268	211	176
ENSG00000011201	ANOS1	protein_coding	P23352	0	2	0	0	0	1	1	1	1
ENSG00000011243	AKAP8L	protein_coding	Q9ULX6	1137	1111	1080	976	707	808	1565	1409	1266
ENSG00000011258	MBTD1	protein_coding	Q05BQ5	185	221	193	292	254	271	223	199	161
ENSG00000011260	UTP18	protein_coding	Q9Y5J1	1234	1379	1230	1797	1210	1575	1348	1101	855
ENSG00000011275	RNF216	protein_coding	Q9NWF9	590	842	723	773	629	773	821	737	649
ENSG00000011295	TTC19	protein_coding	Q6DKK2	336	418	384	466	381	393	394	367	290
ENSG00000011304	PTBP1	protein_coding	P26599	2783	3699	3542	3538	2758	3215	4070	3673	3024
ENSG00000011332	DPF1	protein_coding	Q92782	161	194	145	104	101	114	204	186	162
ENSG00000011347	SYT7	protein_coding	O43581	26	15	19	28	16	27	14	24	16
ENSG00000011376	LARS2	protein_coding	Q15031	353	366	369	638	474	504	402	331	269
ENSG00000011405	PIK3C2A	protein_coding	O00443	687	933	789	1558	1323	1398	850	799	715
ENSG00000011422	PLAUR	protein_coding	Q03405	94	111	120	106	77	79	110	94	101
ENSG00000011426	ANLN	protein_coding	Q9NQW6	900	1235	1132	1528	1113	1311	1271	1279	990
ENSG00000011451	WIZ	protein_coding	O95785	309	427	404	298	271	284	382	336	308
ENSG00000011454	RABGAP1	protein_coding	Q9Y3P9	526	747	645	914	696	929	631	627	559
ENSG00000011465	DCN	protein_coding	P07585	1	1	1	0	0	0	3	0	0
ENSG00000011478	QPCTL	protein_coding	Q9NXS2	273	386	281	270	197	244	286	229	224
ENSG00000011485	PPP5C	protein_coding	P53041	1165	1319	1181	1064	839	975	971	1006	855
ENSG00000011523	CEP68	protein_coding	Q76N32	157	229	213	210	144	182	194	212	144
ENSG00000011566	MAP4K3	protein_coding	Q8IVH8	210	299	227	398	320	399	253	246	195
ENSG00000011590	ZBTB32	protein_coding	Q9Y2Y4	5	7	3	8	4	3	0	4	5
ENSG00000011600	TYROBP	protein_coding	O43914	0	0	0	0	0	0	0	1	0
ENSG00000011638	TMEM159	protein_coding	Q96B96	55	59	42	56	51	59	48	58	42
ENSG00000011677	GABRA3	protein_coding	P34903	0	0	0	1	0	0	0	3	0
ENSG00000012048	BRCA1	protein_coding	P38398	772	990	940	1440	1131	1261	879	828	651
ENSG00000012061	ERCC1	protein_coding	P07992	739	1080	677	481	417	461	797	926	718
ENSG00000012124	CD22	protein_coding	P20273	0	0	0	1	0	1	0	0	0
ENSG00000012171	SEMA3B	protein_coding	Q13214	82	71	54	48	36	49	58	68	45
ENSG00000012174	MBTPS2	protein_coding	O43462	908	1365	1120	1224	905	1101	897	929	702
ENSG00000012211	PRICKLE3	protein_coding	O43900	50	74	80	81	59	69	89	65	32
ENSG00000012223	LTF	protein_coding	P02788	0	0	0	0	0	0	0	1	0
ENSG00000012232	EXTL3	protein_coding	O43909	210	317	279	224	218	276	217	214	157
ENSG00000012504	NR1H4	protein_coding	Q96RI1	0	0	0	1	1	0	0	1	0
ENSG00000012660	ELOVL5	protein_coding	Q9NYP7	1081	1426	1171	1101	852	990	1163	1095	960
ENSG00000012779	ALOX5	protein_coding	P09917	0	0	0	0	0	0	0	0	0
ENSG00000012817	KDM5D	protein_coding	Q9BY66	8	11	8	21	18	18	4	12	14
ENSG00000012822	CALCOCO1	protein_coding	Q9P1Z2	855	1279	763	437	380	469	807	1105	823
ENSG00000012963	UBR7	protein_coding	Q8N806	0	1	2	4	3	0	2	2	2
ENSG00000012983	MAP4K5	protein_coding	Q9Y4K4	248	331	278	491	387	457	286	287	253
ENSG00000013016	EHD3	protein_coding	Q9NZN3	38	75	35	33	42	32	44	43	25
ENSG00000013275	PSMC4	protein_coding	P43686	12	14	17	7	13	7	12	12	8
ENSG00000013288	MAN2B2	protein_coding	Q9Y2E5	204	218	176	110	101	99	169	130	113
ENSG00000013293	SLC7A14	protein_coding	Q8TBB6	0	0	0	0	0	0	0	0	0
ENSG00000013297	CLDN11	protein_coding	O75508	0	0	0	0	0	3	0	0	0
ENSG00000013306	SLC25A39	protein_coding	Q9BZJ4	1204	1600	1341	1065	969	1076	1267	1181	956
ENSG00000013364	MVP	protein_coding	Q14764	33	29	33	43	22	37	34	29	28
ENSG00000013374	NUB1	protein_coding	Q9Y5A7	1359	1905	1618	2445	1698	2002	2010	1871	1453
ENSG00000013375	PGM3	protein_coding	O95394	1473	2079	1929	2758	2158	2412	2320	2094	1997
ENSG00000013392	RWDD2A	protein_coding	#N/A	232	476	296	346	334	432	285	509	330
ENSG00000013441	CLK1	protein_coding	P49759	902	1398	1222	1947	1544	1883	1678	1565	1373
ENSG00000013503	POLR3B	protein_coding	Q9NW08	388	531	453	702	492	549	488	465	329
ENSG00000013523	ANGEL1	protein_coding	Q9UNK9	412	561	551	564	520	614	458	450	399
ENSG00000013561	RNF14	protein_coding	Q9UBS8	351	427	379	519	397	388	447	350	315
ENSG00000013563	DNASE1L1	protein_coding	P49184	63	98	99	91	68	112	64	52	40
ENSG00000013573	DDX11	protein_coding	Q96FC9	645	890	691	294	244	341	518	495	482
ENSG00000013583	HEBP1	protein_coding	Q9NRV9	679	934	736	838	629	657	912	903	706
ENSG00000013588	GPRC5A	protein_coding	Q8NFJ5	37	87	48	64	46	63	52	62	55
ENSG00000013619	MAMLD1	protein_coding	Q13495	25	45	20	41	22	22	25	33	16
ENSG00000013725	CD6	protein_coding	P30203	0	0	0	0	1	0	0	0	1
ENSG00000013810	TACC3	protein_coding	Q9Y6A5	1448	1948	1810	1664	1227	1408	2164	1882	1556
ENSG00000014123	UFL1	protein_coding	O94874	976	1421	1289	1383	989	1144	1050	1074	850
ENSG00000014138	POLA2	protein_coding	Q14181	927	1369	1165	1591	1280	1627	1135	1191	945
ENSG00000014164	ZC3H3	protein_coding	Q8IXZ2	44	58	50	39	43	48	44	43	47
ENSG00000014216	CAPN1	protein_coding	P07384	432	584	552	522	385	452	561	582	425
ENSG00000014257	ACPP	protein_coding	P15309	1	0	1	7	4	3	3	7	0
ENSG00000014641	MDH1	protein_coding	P40925	27686	40254	28426	17485	12440	17787	32595	40297	32699
ENSG00000014824	SLC30A9	protein_coding	Q6PML9	352	540	484	729	610	659	497	417	385
ENSG00000014914	MTMR11	protein_coding	A4FU01	30	30	29	36	25	30	19	19	11
ENSG00000014919	COX15	protein_coding	Q7KZN9	1162	1459	1088	1340	999	1314	1164	1250	1064
ENSG00000015133	CCDC88C	protein_coding	Q9P219	235	251	219	225	198	237	248	239	190
ENSG00000015153	YAF2	protein_coding	Q8IY57	124	143	163	211	156	185	186	166	166
ENSG00000015171	ZMYND11	protein_coding	Q15326	156	234	251	251	163	195	222	204	172
ENSG00000015285	WAS	protein_coding	P42768	25	25	19	19	20	27	28	26	23
ENSG00000015413	DPEP1	protein_coding	P16444	2	9	13	8	0	3	4	6	6
ENSG00000015475	BID	protein_coding	P55957	179	205	204	157	154	168	215	204	137
ENSG00000015479	MATR3.2	protein_coding	#N/A	8	19	15	36	26	26	17	23	12
ENSG00000015520	NPC1L1	protein_coding	Q9UHC9	21	34	52	19	16	17	23	14	25
ENSG00000015532	XYLT2	protein_coding	Q9H1B5	182	210	187	186	166	176	173	185	122
ENSG00000015568	RGPD5	protein_coding	Q99666	31	31	40	21	18	36	35	33	44
ENSG00000015592	STMN4	protein_coding	Q9H169	2	4	4	3	0	3	2	2	0
ENSG00000015676	NUDCD3	protein_coding	Q8IVD9	618	706	681	561	464	587	632	600	491
ENSG00000016082	ISL1	protein_coding	P61371	148	221	182	178	129	137	205	216	149
ENSG00000016391	CHDH	protein_coding	Q8NE62	217	223	148	153	124	191	136	127	123
ENSG00000016402	IL20RA	protein_coding	Q9UHF4	0	0	0	0	0	0	0	0	0
ENSG00000016490	CLCA1	protein_coding	A8K7I4	0	0	0	0	0	0	0	0	0
ENSG00000016602	CLCA4	protein_coding	Q14CN2	0	0	0	0	0	0	0	0	0
ENSG00000016864	GLT8D1	protein_coding	Q68CQ7	353	487	378	426	298	317	373	300	226
ENSG00000017260	ATP2C1	protein_coding	P98194	544	722	655	819	547	596	660	589	415
ENSG00000017427	IGF1	protein_coding	P05019	0	0	0	0	0	0	0	0	0
ENSG00000017483	SLC38A5	protein_coding	Q8WUX1	2	4	2	2	4	3	2	2	2
ENSG00000017797	RALBP1	protein_coding	Q15311	193	201	194	225	185	234	241	233	179
ENSG00000018189	RUFY3	protein_coding	Q7L099	247	341	284	391	301	328	269	258	170
ENSG00000018236	CNTN1	protein_coding	Q12860	91	103	80	132	97	103	85	79	76
ENSG00000018280	SLC11A1	protein_coding	P49279	1	5	2	1	1	6	4	5	4
ENSG00000018408	WWTR1	protein_coding	Q9GZV5	302	360	278	196	170	220	288	318	240
ENSG00000018510	AGPS	protein_coding	O00116	523	753	642	1049	753	902	734	718	580
ENSG00000018607	ZNF806	unprocessed_pseudogene	P0C7X5	1	1	0	0	0	1	0	0	0
ENSG00000018610	CXorf56	protein_coding	Q9H5V9	355	490	443	458	380	356	562	451	413
ENSG00000018625	ATP1A2	protein_coding	P50993	0	1	0	0	0	0	0	0	2
ENSG00000018699	TTC27	protein_coding	Q6P3X3	317	398	399	574	417	521	335	383	308
ENSG00000018869	ZNF582	protein_coding	Q96NG8	87	158	93	67	41	52	123	119	82
ENSG00000019102	VSIG2	protein_coding	Q96IQ7	1	0	3	0	2	1	1	3	1
ENSG00000019144	PHLDB1	protein_coding	Q86UU1	357	364	290	277	218	294	261	404	224
ENSG00000019169	MARCO	protein_coding	Q9UEW3	6	0	1	0	0	0	0	0	0
ENSG00000019186	CYP24A1	protein_coding	Q07973	0	0	0	2	0	2	0	1	0
ENSG00000019485	PRDM11	protein_coding	Q9NQV5	17	33	36	31	28	33	16	25	14
ENSG00000019505	SYT13	protein_coding	Q7L8C5	1	1	2	3	3	0	1	3	2
ENSG00000019549	SNAI2	protein_coding	O43623	81	103	89	104	100	86	61	72	61
ENSG00000019582	CD74	protein_coding	P04233	8	4	1	2	4	2	2	5	3
ENSG00000019991	HGF	protein_coding	P14210	0	0	2	0	2	0	0	0	1
ENSG00000019995	ZRANB1	protein_coding	Q9UGI0	427	536	478	509	345	459	422	457	370
ENSG00000020129	NCDN	protein_coding	Q9UBB6	314	407	409	373	284	335	330	381	315
ENSG00000020181	ADGRA2	protein_coding	Q96PE1	56	78	82	47	55	36	61	50	42
ENSG00000020219	CCT8L1P	processed_pseudogene	A6NM43	1	5	2	4	1	5	0	0	0
ENSG00000020256	ZFP64	protein_coding	Q9NPA5	511	768	580	599	645	858	525	666	551
ENSG00000020426	MNAT1	protein_coding	P51948	453	533	562	717	533	537	657	579	568
ENSG00000020577	SAMD4A	protein_coding	Q9UPU9	64	101	97	59	56	68	67	58	66
ENSG00000020633	RUNX3	protein_coding	Q13761	37	29	25	22	24	19	20	8	16
ENSG00000020922	MRE11	protein_coding	P49959	435	588	563	930	731	804	651	547	471
ENSG00000021300	PLEKHB1	protein_coding	Q9UF11	228	336	256	223	184	208	354	398	292
ENSG00000021355	SERPINB1	protein_coding	P30740	306	468	385	394	290	353	369	362	281
ENSG00000021461	CYP3A43	protein_coding	Q9HB55	0	0	0	1	0	2	0	0	0
ENSG00000021488	SLC7A9	protein_coding	P82251	5	0	2	6	5	6	8	7	5
ENSG00000021574	SPAST	protein_coding	Q9UBP0	276	418	382	485	315	359	369	319	330
ENSG00000021645	NRXN3	protein_coding	Q9Y4C0	60	81	63	71	58	46	51	35	41
ENSG00000021762	OSBPL5	protein_coding	Q9H0X9	74	76	66	40	39	53	68	55	51
ENSG00000021776	AQR	protein_coding	O60306	1053	1366	1120	1635	1388	1602	1117	1017	887
ENSG00000021826	CPS1	protein_coding	P31327	138	228	191	385	249	326	222	185	177
ENSG00000021852	C8B	protein_coding	P07358	0	0	0	0	0	0	0	0	0
ENSG00000022267	FHL1	protein_coding	Q13642	2268	3051	2584	2133	1737	1839	3031	3116	2555
ENSG00000022277	RTFDC1	protein_coding	Q9BY42	1134	1456	1467	1726	1181	1616	1769	1626	1392
ENSG00000022355	GABRA1	protein_coding	P14867	0	0	0	0	0	1	0	0	0
ENSG00000022556	NLRP2	protein_coding	Q9NX02	0	0	0	0	0	0	0	0	0
ENSG00000022567	SLC45A4	protein_coding	Q5BKX6	117	141	143	112	77	109	112	97	80
ENSG00000022840	RNF10	protein_coding	Q8N5U6	444	654	579	683	534	639	567	505	441
ENSG00000022976	ZNF839	protein_coding	A8K0R7	114	140	121	185	137	147	118	108	87
ENSG00000023041	ZDHHC6	protein_coding	Q9H6R6	243	327	221	247	196	193	226	207	173
ENSG00000023171	GRAMD1B	protein_coding	Q3KR37	53	51	50	65	40	57	67	56	56
ENSG00000023191	RNH1	protein_coding	P13489	11	72	93	19	16	3	100	74	6
ENSG00000023228	NDUFS1	protein_coding	P28331	29	17	13	20	11	22	18	13	3
ENSG00000023287	RB1CC1	protein_coding	Q8TDY2	830	1257	825	1339	1081	1362	884	906	908
ENSG00000023318	ERP44	protein_coding	Q9BS26	6976	10608	6107	4517	3213	3960	5466	5783	5229
ENSG00000023330	ALAS1	protein_coding	P13196	785	1086	1039	933	689	795	1351	1182	1050
ENSG00000023445	BIRC3	protein_coding	Q13489	1	1	1	3	0	1	3	0	0
ENSG00000023516	AKAP11	protein_coding	Q9UKA4	494	629	532	957	712	848	584	548	463
ENSG00000023572	GLRX2	protein_coding	Q9NS18	280	393	433	494	300	423	538	447	401
ENSG00000023608	SNAPC1	protein_coding	Q16533	244	224	224	306	242	235	316	200	178
ENSG00000023697	DERA	protein_coding	Q9Y315	367	445	439	363	283	392	420	390	338
ENSG00000023734	STRAP	protein_coding	Q9Y3F4	3139	4601	3946	4251	3004	3686	4100	4082	3478
ENSG00000023839	ABCC2	protein_coding	Q92887	10	12	7	31	14	20	6	16	10
ENSG00000023892	DEF6	protein_coding	Q9H4E7	15	31	26	23	14	15	35	19	12
ENSG00000023902	PLEKHO1	protein_coding	Q53GL0	147	180	145	161	108	136	165	163	126
ENSG00000023909	GCLM	protein_coding	P48507	310	388	345	780	509	624	495	407	398
ENSG00000024048	UBR2	protein_coding	Q8IWV8	713	1001	919	1115	799	1030	893	846	611
ENSG00000024422	EHD2	protein_coding	Q9NZN4	47	40	35	35	25	30	58	38	34
ENSG00000024526	DEPDC1	protein_coding	Q5TB30	345	457	419	562	454	519	423	374	299
ENSG00000024862	CCDC28A	protein_coding	Q8IWP9	195	280	252	221	163	208	317	285	199
ENSG00000025039	RRAGD	protein_coding	Q9NQL2	83	119	94	107	60	109	84	91	72
ENSG00000025156	HSF2	protein_coding	Q03933	473	671	645	830	550	699	769	683	580
ENSG00000025293	PHF20	protein_coding	Q9BVI0	323	395	401	486	380	397	457	365	333
ENSG00000025423	HSD17B6	protein_coding	O14756	158	180	143	112	94	118	150	135	106
ENSG00000025434	NR1H3	protein_coding	Q13133	62	86	75	92	64	70	94	58	49
ENSG00000025708	TYMP	protein_coding	P19971	13	14	11	12	6	10	11	10	9
ENSG00000025770	NCAPH2	protein_coding	Q6IBW4	485	667	559	454	351	387	491	471	420
ENSG00000025772	TOMM34	protein_coding	Q15785	2372	3009	2546	2904	2063	2525	3467	3741	3098
ENSG00000025796	SEC63	protein_coding	Q9UGP8	944	1259	1164	1661	1287	1418	1184	988	955
ENSG00000025800	KPNA6	protein_coding	O60684	906	1441	1361	1463	1096	1375	1324	1279	1008
ENSG00000026025	VIM	protein_coding	P08670	1732	2130	1936	3462	2271	3041	2381	2353	1754
ENSG00000026036	RTEL1-TNFRSF6B	protein_coding	F6WH68	16	18	10	5	10	6	11	5	10
ENSG00000026103	FAS	protein_coding	P25445	28	45	60	75	54	53	43	40	53
ENSG00000026297	RNASET2	protein_coding	O00584	108	112	83	97	79	58	117	151	83
ENSG00000026508	CD44	protein_coding	P16070	5	10	2	5	4	0	11	3	1
ENSG00000026559	KCNG1	protein_coding	Q9UIX4	73	82	66	54	45	49	59	68	63
ENSG00000026652	AGPAT4	protein_coding	Q9NRZ5	741	942	657	519	439	490	582	728	508
ENSG00000026751	SLAMF7	protein_coding	Q9NQ25	0	1	0	0	0	0	0	0	0
ENSG00000026950	BTN3A1	protein_coding	O00481	47	42	35	57	41	41	32	34	24
ENSG00000027001	MIPEP	protein_coding	Q99797	226	328	320	466	261	399	357	361	273
ENSG00000027075	PRKCH	protein_coding	P24723	78	87	59	73	67	60	94	69	71
ENSG00000027644	INSRR	protein_coding	P14616	3	7	2	2	2	2	0	1	3
ENSG00000027697	IFNGR1	protein_coding	P15260	809	1040	849	880	623	777	833	751	690
ENSG00000027847	B4GALT7	protein_coding	Q9UBV7	244	296	305	158	147	147	207	184	197
ENSG00000027869	SH2D2A	protein_coding	Q9NP31	33	34	48	29	23	22	29	36	38
ENSG00000028116	VRK2	protein_coding	Q86Y07	172	219	209	332	270	270	232	220	196
ENSG00000028137	TNFRSF1B	protein_coding	P20333	1	1	1	3	0	0	0	0	1
ENSG00000028203	VEZT	protein_coding	Q9HBM0	220	331	278	460	362	421	272	300	201
ENSG00000028277	POU2F2	protein_coding	P09086	22	28	15	24	21	25	27	22	12
ENSG00000028310	BRD9	protein_coding	Q9H8M2	338	353	304	348	252	355	293	277	253
ENSG00000028528	SNX1	protein_coding	Q13596	368	424	377	572	389	476	488	397	354
ENSG00000028839	TBPL1	protein_coding	P62380	173	230	220	258	181	204	221	217	158
ENSG00000029153	ARNTL2	protein_coding	Q8WYA1	27	37	32	58	54	57	24	33	28
ENSG00000029363	BCLAF1	protein_coding	Q9NYF8	1393	1815	1575	1975	1546	1747	2204	1969	1738
ENSG00000029364	SLC39A9	protein_coding	Q9NUM3	846	1108	880	543	467	510	786	726	552
ENSG00000029534	ANK1	protein_coding	P16157	46	73	53	37	49	49	51	53	38
ENSG00000029559	IBSP	protein_coding	P21815	0	0	0	0	0	0	0	0	0
ENSG00000029639	TFB1M	protein_coding	Q8WVM0	228	348	273	464	346	383	296	319	269
ENSG00000029725	RABEP1	protein_coding	Q15276	734	799	645	973	786	845	806	789	589
ENSG00000029993	HMGB3	protein_coding	O15347	736	1000	1002	836	581	647	1193	1011	860
ENSG00000030066	NUP160	protein_coding	Q12769	1135	1426	1278	2536	1790	2147	1331	1227	1059
ENSG00000030110	BAK1	protein_coding	Q16611	285	314	184	156	125	157	196	169	178
ENSG00000030304	MUSK	protein_coding	O15146	3	0	0	0	0	0	0	0	0
ENSG00000030419	IKZF2	protein_coding	Q9UKS7	43	49	33	51	22	40	41	44	51
ENSG00000030582	GRN	protein_coding	P28799	2268	3067	2560	1041	849	981	2401	2053	1834
ENSG00000031003	FAM13B	protein_coding	Q9NYF5	384	396	344	644	529	580	435	442	378
ENSG00000031081	ARHGAP31	protein_coding	Q2M1Z3	27	48	36	52	38	36	36	35	22
ENSG00000031691	CENPQ	protein_coding	Q7L2Z9	276	340	294	473	298	345	421	366	309
ENSG00000031698	SARS	protein_coding	P49591	4923	6387	5786	5556	4157	4873	7113	6560	5275
ENSG00000031823	RANBP3	protein_coding	Q9H6Z4	706	844	679	724	555	645	707	700	578
ENSG00000032219	ARID4A	protein_coding	P29374	439	458	412	731	554	632	523	483	449
ENSG00000032389	TSSC1	protein_coding	#N/A	513	690	570	358	281	304	545	509	506
ENSG00000032444	PNPLA6	protein_coding	Q8IY17	163	159	154	170	139	148	119	112	132
ENSG00000032742	IFT88	protein_coding	Q13099	58	62	68	128	81	109	77	76	56
ENSG00000033011	ALG1	protein_coding	Q9BT22	334	498	456	288	222	279	428	379	374
ENSG00000033030	ZCCHC8	protein_coding	Q6NZY4	993	1205	1086	1583	1139	1664	1240	1149	1066
ENSG00000033050	ABCF2	protein_coding	Q9UG63	1349	1667	1468	1554	1293	1400	1573	1392	1091
ENSG00000033100	CHPF2	protein_coding	Q9P2E5	502	699	536	645	508	653	470	464	395
ENSG00000033122	LRRC7	protein_coding	Q96NW7	0	1	0	2	0	1	0	0	0
ENSG00000033170	FUT8	protein_coding	Q9BYC5	102	148	115	163	122	177	137	139	94
ENSG00000033178	UBA6	protein_coding	A0AVT1	716	1026	890	1428	1059	1211	1026	921	781
ENSG00000033327	GAB2	protein_coding	Q9UQC2	87	85	98	99	80	98	102	108	83
ENSG00000033627	ATP6V0A1	protein_coding	Q93050	1708	2130	1861	2061	1495	1869	1927	2039	1462
ENSG00000033800	PIAS1	protein_coding	O75925	405	609	567	685	498	643	639	659	568
ENSG00000033867	SLC4A7	protein_coding	Q9Y6M7	497	709	518	744	592	692	526	591	470
ENSG00000034053	APBA2	protein_coding	Q99767	3	2	3	0	1	1	4	1	2
ENSG00000034152	MAP2K3	protein_coding	P46734	422	477	551	447	374	422	502	556	433
ENSG00000034239	EFCAB1	protein_coding	Q9HAE3	1	1	0	0	0	0	0	0	0
ENSG00000034510	TMSB10	protein_coding	P63313	1166	1259	1147	1522	1025	1142	1701	1452	1100
ENSG00000034533	ASTE1	protein_coding	Q2TB18	122	164	117	194	148	165	132	137	104
ENSG00000034677	RNF19A	protein_coding	Q9NV58	173	182	168	191	173	187	149	153	134
ENSG00000034693	PEX3	protein_coding	P56589	247	348	357	625	379	499	351	345	261
ENSG00000034713	GABARAPL2	protein_coding	P60520	1582	2275	1916	1854	1361	1531	2204	1978	1941
ENSG00000034971	MYOC	protein_coding	Q99972	0	0	0	0	0	0	0	0	0
ENSG00000035115	SH3YL1	protein_coding	Q96HL8	41	85	54	83	47	84	49	37	54
ENSG00000035141	FAM136A	protein_coding	Q96C01	204	270	215	295	250	299	271	224	224
ENSG00000035403	VCL	protein_coding	P18206	1341	1757	1554	1985	1422	1624	1967	1827	1541
ENSG00000035499	DEPDC1B	protein_coding	Q8WUY9	314	402	314	381	244	353	385	382	377
ENSG00000035664	DAPK2	protein_coding	Q9UIK4	3	10	12	3	9	9	5	1	8
ENSG00000035681	NSMAF	protein_coding	Q92636	110	97	106	178	132	162	103	81	61
ENSG00000035687	ADSS	protein_coding	P30520	773	996	876	1559	1092	1304	989	930	880
ENSG00000035720	STAP1	protein_coding	Q9ULZ2	0	1	0	2	0	1	2	1	1
ENSG00000035862	TIMP2	protein_coding	P16035	207	284	156	44	50	52	248	273	238
ENSG00000035928	RFC1	protein_coding	P35251	739	852	811	1187	952	1091	926	828	702
ENSG00000036054	TBC1D23	protein_coding	Q9NUY8	279	436	404	637	478	558	432	374	272
ENSG00000036257	CUL3	protein_coding	Q13618	1911	2832	2485	2854	2063	3265	2157	2500	2300
ENSG00000036448	MYOM2	protein_coding	P54296	0	2	2	2	3	0	0	3	1
ENSG00000036473	OTC	protein_coding	P00480	0	0	0	0	0	0	0	0	0
ENSG00000036530	CYP46A1	protein_coding	Q9Y6A2	0	5	7	3	5	3	2	5	4
ENSG00000036549	ZZZ3	protein_coding	Q8IYH5	507	643	490	829	593	753	452	500	444
ENSG00000036565	SLC18A1	protein_coding	P54219	0	0	0	0	0	0	0	0	0
ENSG00000036672	USP2	protein_coding	O75604	250	346	239	237	211	222	263	312	218
ENSG00000036828	CASR.1	protein_coding	#N/A	0	0	0	0	1	1	0	0	0
ENSG00000037042	TUBG2	protein_coding	Q9NRH3	32	68	39	60	32	75	37	46	26
ENSG00000037241	RPL26L1	protein_coding	Q9UNX3	114	187	145	211	160	177	165	175	146
ENSG00000037280	FLT4	protein_coding	P35916	627	672	558	359	246	350	536	514	498
ENSG00000037474	NSUN2	protein_coding	Q08J23	2394	3335	2710	2326	1846	2239	2666	2678	2341
ENSG00000037637	FBXO42	protein_coding	Q6P3S6	345	418	340	336	259	290	304	281	277
ENSG00000037749	MFAP3	protein_coding	P55082	419	678	544	468	332	434	489	525	391
ENSG00000037757	MRI1	protein_coding	Q9BV20	446	506	444	360	255	331	449	410	334
ENSG00000037897	METTL1	protein_coding	Q9UBP6	658	678	548	621	365	626	562	594	505
ENSG00000037965	HOXC8	protein_coding	P31273	19	25	30	35	30	25	34	16	24
ENSG00000038002	AGA	protein_coding	P20933	687	910	744	628	442	591	777	753	628
ENSG00000038210	PI4K2B	protein_coding	Q8TCG2	40	41	41	32	17	44	30	25	21
ENSG00000038219	BOD1L1	protein_coding	Q8NFC6	1109	1256	1034	1786	1248	1506	1280	1198	1008
ENSG00000038274	MAT2B	protein_coding	Q9NZL9	377	516	502	633	466	557	567	533	438
ENSG00000038295	TLL1	protein_coding	O43897	21	44	34	37	19	42	36	26	23
ENSG00000038358	EDC4	protein_coding	Q6P2E9	554	666	701	791	570	658	663	598	491
ENSG00000038382	TRIO	protein_coding	O75962	510	564	526	662	560	702	476	462	351
ENSG00000038427	VCAN	protein_coding	P13611	1099	1584	1242	1390	922	1099	1071	953	784
ENSG00000038532	CLEC16A	protein_coding	Q2KHT3	636	830	598	748	458	686	657	701	610
ENSG00000038945	MSR1	protein_coding	P21757	0	0	0	0	0	0	0	0	0
ENSG00000039068	CDH1	protein_coding	P12830	48	56	56	51	39	36	60	50	40
ENSG00000039123	SKIV2L2	protein_coding	#N/A	957	1355	1302	2232	1547	1981	1413	1312	1102
ENSG00000039139	DNAH5	protein_coding	Q8TE73	5	3	4	1	3	4	4	1	4
ENSG00000039319	ZFYVE16	protein_coding	Q7Z3T8	392	515	466	932	590	768	531	458	399
ENSG00000039523	FAM65A	protein_coding	#N/A	8	6	7	1	3	3	4	9	5
ENSG00000039537	C6	protein_coding	P13671	0	0	0	0	0	0	0	0	0
ENSG00000039560	RAI14	protein_coding	Q9P0K7	365	436	400	691	483	602	473	457	344
ENSG00000039600	SOX30	protein_coding	O94993	2	1	8	5	5	5	3	4	5
ENSG00000039650	PNKP	protein_coding	Q96T60	265	343	266	245	211	246	260	257	221
ENSG00000039987	BEST2	protein_coding	Q8NFU1	7	11	6	6	5	5	4	1	6
ENSG00000040199	PHLPP2	protein_coding	Q6ZVD8	229	260	200	287	237	296	250	225	180
ENSG00000040275	SPDL1	protein_coding	Q96EA4	1139	1590	1426	2100	1617	1832	1636	1651	1270
ENSG00000040341	STAU2	protein_coding	Q9NUL3	208	271	220	343	274	305	300	290	261
ENSG00000040487	PQLC2	protein_coding	Q6ZP29	253	322	277	201	146	188	290	204	209
ENSG00000040531	CTNS	protein_coding	O60931	281	306	294	215	208	255	271	228	241
ENSG00000040608	RTN4R	protein_coding	Q9BZR6	15	34	26	22	15	25	17	29	21
ENSG00000040633	PHF23	protein_coding	Q9BUL5	672	781	797	681	506	634	757	639	567
ENSG00000040731	CDH10	protein_coding	Q9Y6N8	4	7	7	8	10	4	8	5	3
ENSG00000040933	INPP4A	protein_coding	Q96PE3	300	403	375	363	289	312	309	266	253
ENSG00000041353	RAB27B	protein_coding	O00194	0	0	0	3	2	0	1	0	0
ENSG00000041357	PSMA4	protein_coding	P25789	8469	13912	9841	7343	4902	6435	11809	14027	13404
ENSG00000041515	MYO16	protein_coding	Q9Y6X6	0	0	0	0	0	1	0	0	0
ENSG00000041802	LSG1	protein_coding	Q9H089	549	650	562	685	491	547	716	631	575
ENSG00000041880	PARP3	protein_coding	Q9Y6F1	85	110	81	89	79	64	84	78	43
ENSG00000041982	TNC	protein_coding	P24821	68	71	51	63	30	27	60	65	36
ENSG00000041988	THAP3	protein_coding	Q8WTV1	65	70	81	70	62	75	85	77	74
ENSG00000042062	FAM65C	protein_coding	#N/A	4	2	2	4	1	1	0	1	2
ENSG00000042088	TDP1	protein_coding	Q9NUW8	177	220	201	280	214	258	197	175	140
ENSG00000042286	AIFM2	protein_coding	Q9BRQ8	220	313	187	120	78	117	235	264	203
ENSG00000042304	C2orf83	protein_coding	Q53S99	0	0	0	0	0	0	0	0	0
ENSG00000042317	SPATA7	protein_coding	Q9P0W8	42	55	49	99	85	86	65	62	49
ENSG00000042429	MED17	protein_coding	A0A1W2PRB8	878	1086	999	1048	741	935	1038	1049	952
ENSG00000042445	RETSAT	protein_coding	Q6NUM9	209	265	238	221	172	205	219	215	181
ENSG00000042493	CAPG	protein_coding	P40121	133	182	138	107	95	107	158	136	106
ENSG00000042753	AP2S1	protein_coding	P53680	1754	2635	2471	1778	1314	1619	2916	2820	2447
ENSG00000042781	USH2A	protein_coding	O75445	0	0	3	3	0	0	1	0	0
ENSG00000042813	ZPBP	protein_coding	Q9BS86	0	0	0	0	0	0	0	0	3
ENSG00000042832	TG	protein_coding	P01266	4	6	4	0	3	1	2	0	3
ENSG00000042980	ADAM28	protein_coding	Q9UKQ2	0	0	0	0	0	0	0	0	0
ENSG00000043039	BARX2	protein_coding	Q9UMQ3	53	54	34	46	30	39	56	45	33
ENSG00000043093	DCUN1D1	protein_coding	Q96GG9	218	253	236	441	337	411	316	271	292
ENSG00000043143	JADE2	protein_coding	Q9NQC1	61	68	78	54	36	48	69	55	50
ENSG00000043355	ZIC2	protein_coding	O95409	596	755	696	447	358	442	690	700	595
ENSG00000043462	LCP2	protein_coding	Q13094	0	0	0	0	0	0	1	0	0
ENSG00000043514	TRIT1	protein_coding	Q9H3H1	202	246	259	361	228	296	267	282	231
ENSG00000043591	ADRB1	protein_coding	P08588	2	2	0	3	1	1	5	1	1
ENSG00000044012	GUCA2B	protein_coding	Q16661	0	0	0	0	0	0	0	0	0
ENSG00000044090	CUL7	protein_coding	Q14999	382	482	391	354	297	320	354	312	314
ENSG00000044115	CTNNA1	protein_coding	P35221	1756	2477	2444	2418	1756	2204	3043	2908	2359
ENSG00000044446	PHKA2	protein_coding	P46019	224	249	234	260	200	218	198	205	171
ENSG00000044459	CNTLN	protein_coding	Q9NXG0	131	187	176	196	156	230	161	149	124
ENSG00000044524	EPHA3	protein_coding	P29320	100	138	111	132	112	118	117	86	81
ENSG00000044574	HSPA5	protein_coding	P11021	211537	255383	200476	100603	72602	79436	180025	166163	141766
ENSG00000046604	DSG2	protein_coding	Q14126	2080	3088	2715	2874	2062	2334	2428	2246	1806
ENSG00000046647	GEMIN8	protein_coding	Q9NWZ8	111	166	134	158	107	145	150	148	147
ENSG00000046651	OFD1	protein_coding	O75665	163	233	195	435	323	360	218	168	156
ENSG00000046653	GPM6B	protein_coding	Q13491	100	209	165	158	131	147	159	188	136
ENSG00000046774	MAGEC2	protein_coding	Q9UBF1	2	3	4	0	1	2	4	1	0
ENSG00000046889	PREX2	protein_coding	Q70Z35	30	35	45	88	53	88	48	36	33
ENSG00000047056	WDR37	protein_coding	Q9Y2I8	296	357	310	383	305	346	293	255	216
ENSG00000047188	YTHDC2	protein_coding	Q9H6S0	735	1041	884	1447	1003	1425	913	966	735
ENSG00000047230	CTPS2	protein_coding	Q9NRF8	203	290	242	398	303	350	255	273	212
ENSG00000047249	ATP6V1H	protein_coding	Q9UI12	745	1054	877	1261	888	1043	1072	935	800
ENSG00000047315	POLR2B	protein_coding	P30876	2210	3234	2677	5160	3966	5196	2771	3334	2593
ENSG00000047346	FAM214A	protein_coding	Q32MH5	106	173	103	149	118	120	139	164	139
ENSG00000047365	ARAP2	protein_coding	Q8WZ64	35	39	23	66	63	60	53	50	47
ENSG00000047410	TPR	protein_coding	P12270	6092	7287	6078	11140	7988	9722	6519	6355	4949
ENSG00000047457	CP	protein_coding	P00450	2	1	0	0	1	1	0	0	0
ENSG00000047578	KIAA0556	protein_coding	O60303	158	194	171	190	161	193	166	167	145
ENSG00000047579	DTNBP1	protein_coding	Q96EV8	866	1364	1117	841	639	722	1205	1088	1062
ENSG00000047597	XK	protein_coding	P51811	33	49	30	34	20	22	30	26	18
ENSG00000047617	ANO2	protein_coding	Q9NQ90	3	2	0	1	2	2	2	0	0
ENSG00000047621	C12orf4	protein_coding	Q9NQ89	341	424	370	553	461	512	445	414	366
ENSG00000047634	SCML1	protein_coding	Q9UN30	999	1298	1166	1480	1028	1201	1352	1190	998
ENSG00000047644	WWC3	protein_coding	Q9ULE0	0	0	2	4	0	1	1	1	1
ENSG00000047648	ARHGAP6	protein_coding	O43182	0	5	1	0	1	0	0	0	1
ENSG00000047662	FAM184B	protein_coding	#N/A	15	16	10	12	6	17	13	12	10
ENSG00000047849	MAP4	protein_coding	P27816	1994	2752	2243	2664	2014	2184	2693	2727	2237
ENSG00000047932	GOPC	protein_coding	Q9HD26	619	775	697	767	550	711	728	700	559
ENSG00000047936	ROS1	protein_coding	P08922	0	1	0	0	0	0	0	0	0
ENSG00000048028	USP28	protein_coding	Q96RU2	355	444	345	581	432	540	361	374	256
ENSG00000048052	HDAC9	protein_coding	Q9UKV0	2	2	4	2	5	8	12	6	2
ENSG00000048140	TSPAN17	protein_coding	Q96FV3	130	159	145	114	79	113	105	122	92
ENSG00000048162	NOP16	protein_coding	Q9Y3C1	267	345	333	442	280	346	382	345	302
ENSG00000048342	CC2D2A	protein_coding	Q9P2K1	54	70	76	86	70	84	62	68	72
ENSG00000048392	RRM2B	protein_coding	Q7LG56	132	168	141	242	169	225	151	126	133
ENSG00000048405	ZNF800	protein_coding	Q2TB10	223	344	230	322	265	267	233	245	203
ENSG00000048462	TNFRSF17	protein_coding	Q02223	1	0	0	0	3	0	2	0	0
ENSG00000048471	SNX29	protein_coding	Q8TEQ0	227	228	177	248	183	225	204	213	145
ENSG00000048540	LMO3	protein_coding	Q8TAP4	0	0	2	0	0	1	0	1	0
ENSG00000048544	MRPS10	protein_coding	P82664	424	540	562	609	405	638	553	594	530
ENSG00000048545	GUCA1A	protein_coding	P43080	0	0	0	0	0	2	0	0	0
ENSG00000048649	RSF1	protein_coding	Q96T23	1388	1630	1290	2047	1418	1719	1764	1750	1377
ENSG00000048707	VPS13D	protein_coding	Q5THJ4	310	409	312	498	458	534	360	346	259
ENSG00000048740	CELF2	protein_coding	O95319	151	230	216	229	149	224	264	253	187
ENSG00000048828	FAM120A	protein_coding	Q9NZB2	453	540	490	580	472	558	454	493	378
ENSG00000048991	R3HDM1	protein_coding	Q15032	179	233	211	442	317	420	229	243	209
ENSG00000049089	COL9A2	protein_coding	Q14055	10	9	5	6	1	11	1	5	3
ENSG00000049130	KITLG	protein_coding	P21583	79	86	115	107	81	95	109	71	60
ENSG00000049167	ERCC8	protein_coding	Q13216	100	105	132	133	109	105	112	136	77
ENSG00000049192	ADAMTS6	protein_coding	Q9UKP5	14	15	17	32	24	11	12	9	21
ENSG00000049239	H6PD	protein_coding	O95479	102	160	122	111	82	114	121	114	84
ENSG00000049245	VAMP3	protein_coding	Q15836	347	458	436	598	395	500	539	464	422
ENSG00000049246	PER3	protein_coding	P56645	9	24	15	19	18	16	2	12	10
ENSG00000049247	UTS2	protein_coding	O95399	5	0	2	4	0	4	3	0	2
ENSG00000049249	TNFRSF9	protein_coding	Q07011	15	11	18	12	13	11	21	11	12
ENSG00000049283	EPN3	protein_coding	Q9H201	1	0	7	5	1	4	5	2	1
ENSG00000049323	LTBP1	protein_coding	Q14766	296	325	265	256	190	213	187	159	147
ENSG00000049449	RCN1	protein_coding	Q15293	647	796	692	532	402	529	636	636	508
ENSG00000049540	ELN	protein_coding	P15502	1	1	1	0	0	1	0	2	0
ENSG00000049541	RFC2	protein_coding	P35250	1049	1369	1267	1641	1223	1516	1517	1421	1180
ENSG00000049618	ARID1B	protein_coding	Q8NFD5	420	529	537	481	446	490	389	396	330
ENSG00000049656	CLPTM1L	protein_coding	Q96KA5	90	106	107	130	132	132	91	110	94
ENSG00000049759	NEDD4L	protein_coding	Q96PU5	122	165	183	211	154	192	192	170	165
ENSG00000049768	FOXP3	protein_coding	Q9BZS1	13	4	5	10	9	6	2	1	8
ENSG00000049769	PPP1R3F	protein_coding	Q6ZSY5	47	66	49	32	26	43	39	40	46
ENSG00000049860	HEXB	protein_coding	P07686	403	570	496	557	423	470	517	456	406
ENSG00000049883	PTCD2	protein_coding	Q8WV60	142	158	160	225	171	262	173	164	126
ENSG00000050030	KIAA2022	protein_coding	#N/A	22	35	21	33	40	30	34	34	41
ENSG00000050130	JKAMP	protein_coding	Q9P055	335	432	350	309	239	251	322	298	258
ENSG00000050165	DKK3	protein_coding	Q9UBP4	19	4	14	3	8	8	17	7	13
ENSG00000050327	ARHGEF5	protein_coding	Q12774	0	0	0	0	0	1	0	0	0
ENSG00000050344	NFE2L3	protein_coding	Q9Y4A8	32	48	51	104	79	104	36	41	23
ENSG00000050393	MCUR1	protein_coding	Q96AQ8	286	347	268	341	252	302	267	233	242
ENSG00000050405	LIMA1	protein_coding	Q9UHB6	1340	1566	1165	1685	1156	1343	1350	1376	1168
ENSG00000050426	LETMD1	protein_coding	Q6P1Q0	489	715	616	551	464	504	636	672	553
ENSG00000050438	SLC4A8	protein_coding	Q2Y0W8	8	9	7	19	14	22	11	17	4
ENSG00000050555	LAMC3	protein_coding	Q9Y6N6	32	26	30	30	11	33	37	13	14
ENSG00000050628	PTGER3	protein_coding	P43115	0	1	1	0	2	3	2	0	0
ENSG00000050730	TNIP3	protein_coding	Q96KP6	0	1	0	0	0	0	0	0	1
ENSG00000050748	MAPK9	protein_coding	P45984	358	419	418	620	527	575	436	431	342
ENSG00000050767	COL23A1	protein_coding	Q86Y22	6	16	8	12	2	2	6	3	8
ENSG00000050820	BCAR1	protein_coding	P56945	432	525	469	266	262	302	509	444	437
ENSG00000051009	FAM160A2	protein_coding	Q8N612	423	554	419	400	352	432	387	411	341
ENSG00000051108	HERPUD1	protein_coding	Q15011	1784	2630	2298	2194	1627	1799	2173	2116	1639
ENSG00000051128	HOMER3	protein_coding	Q9NSC5	22	26	43	16	9	18	19	16	18
ENSG00000051180	RAD51	protein_coding	Q06609	239	306	299	311	233	275	368	329	253
ENSG00000051341	POLQ	protein_coding	O75417	510	685	527	834	663	798	532	485	437
ENSG00000051382	PIK3CB	protein_coding	P42338	117	161	132	185	171	191	123	131	105
ENSG00000051523	CYBA	protein_coding	P13498	548	703	620	267	211	244	654	523	487
ENSG00000051596	THOC3	protein_coding	Q96J01	793	950	686	629	487	564	814	789	839
ENSG00000051620	HEBP2	protein_coding	Q9Y5Z4	698	989	1082	692	490	645	1040	1054	934
ENSG00000051825	MPHOSPH9	protein_coding	Q99550	611	704	574	1032	840	936	636	601	481
ENSG00000052126	PLEKHA5	protein_coding	Q9HAU0	176	249	251	302	219	269	224	252	210
ENSG00000052344	PRSS8	protein_coding	Q16651	12	7	8	9	6	11	4	10	3
ENSG00000052723	SIKE1	protein_coding	Q9BRV8	577	863	827	793	628	706	995	819	785
ENSG00000052749	RRP12	protein_coding	Q5JTH9	1483	1839	1636	1450	1096	1327	1388	1203	1145
ENSG00000052795	FNIP2	protein_coding	Q9P278	56	69	48	97	68	107	69	44	31
ENSG00000052802	MSMO1	protein_coding	Q15800	317	539	515	829	533	697	486	504	433
ENSG00000052841	TTC17	protein_coding	Q96AE7	326	434	373	447	314	391	297	301	249
ENSG00000052850	ALX4	protein_coding	Q9H161	54	68	80	51	54	41	63	58	51
ENSG00000053108	FSTL4	protein_coding	Q6MZW2	9	5	7	10	1	9	5	5	2
ENSG00000053254	FOXN3	protein_coding	O00409	91	90	81	116	110	122	82	91	67
ENSG00000053328	METTL24	protein_coding	Q5JXM2	8	7	8	6	3	6	5	7	5
ENSG00000053371	AKR7A2	protein_coding	O43488	372	516	442	383	299	374	559	457	431
ENSG00000053372	MRTO4	protein_coding	Q9UKD2	1359	1605	1328	1253	1009	1165	1421	1501	1179
ENSG00000053438	NNAT	protein_coding	Q16517	9	5	10	9	6	4	4	5	13
ENSG00000053501	USE1	protein_coding	Q9NZ43	311	356	318	248	186	217	329	286	218
ENSG00000053524	MCF2L2	protein_coding	Q86YR7	11	10	4	26	12	16	10	12	9
ENSG00000053702	NRIP2	protein_coding	Q9BQI9	1	8	3	12	3	10	0	6	4
ENSG00000053747	LAMA3	protein_coding	Q16787	166	233	185	290	192	263	183	174	130
ENSG00000053770	AP5M1	protein_coding	Q9H0R1	194	316	281	450	356	375	275	269	209
ENSG00000053900	ANAPC4	protein_coding	Q9UJX5	408	467	378	905	609	732	434	440	329
ENSG00000053918	KCNQ1	protein_coding	P51787	3	13	8	1	4	6	2	3	5
ENSG00000054116	TRAPPC3	protein_coding	O43617	986	1189	1089	1547	1178	1346	1393	1219	979
ENSG00000054118	THRAP3	protein_coding	Q9Y2W1	1339	1817	1609	1934	1428	1680	2217	1996	1828
ENSG00000054148	PHPT1	protein_coding	Q9NRX4	902	1129	1167	1395	918	1149	1442	1235	1161
ENSG00000054179	ENTPD2	protein_coding	Q9Y5L3	3	4	2	2	6	2	5	0	4
ENSG00000054219	LY75	protein_coding	O60449	0	0	0	0	0	0	0	0	0
ENSG00000054267	ARID4B	protein_coding	Q4LE39	1279	1357	1223	1878	1400	1677	1504	1293	1156
ENSG00000054277	OPN3	protein_coding	Q9H1Y3	1	2	0	6	5	5	3	3	3
ENSG00000054282	SDCCAG8	protein_coding	Q86SQ7	1	5	1	3	3	4	4	3	2
ENSG00000054356	PTPRN	protein_coding	Q16849	0	2	0	0	0	1	1	0	0
ENSG00000054392	HHAT	protein_coding	Q5VTY9	0	0	0	0	0	0	0	0	0
ENSG00000054523	KIF1B	protein_coding	O60333	1190	1497	1287	1747	1360	1664	1452	1328	1125
ENSG00000054598	FOXC1	protein_coding	Q12948	1218	1493	1514	1566	1213	1390	1616	1471	1115
ENSG00000054611	TBC1D22A	protein_coding	Q8WUA7	102	121	125	111	99	122	86	96	70
ENSG00000054654	SYNE2	protein_coding	Q8WXH0	348	461	383	722	527	588	378	405	296
ENSG00000054690	PLEKHH1	protein_coding	Q9ULM0	177	164	186	184	134	199	152	125	112
ENSG00000054793	ATP9A	protein_coding	O75110	239	322	245	277	244	267	227	194	200
ENSG00000054796	SPO11	protein_coding	Q9Y5K1	0	0	0	0	0	0	0	0	0
ENSG00000054803	CBLN4	protein_coding	Q9NTU7	0	0	0	0	0	0	0	0	1
ENSG00000054938	CHRDL2	protein_coding	Q6WN34	2	1	0	6	1	1	3	2	0
ENSG00000054965	FAM168A	protein_coding	Q92567	135	254	177	251	237	226	203	186	163
ENSG00000054967	RELT	protein_coding	Q969Z4	82	81	93	67	61	50	74	78	57
ENSG00000054983	GALC	protein_coding	P54803	90	95	69	66	54	61	63	75	65
ENSG00000055044	NOP58	protein_coding	Q9Y2X3	2326	3225	2870	3632	2807	3365	3489	2899	2936
ENSG00000055070	SZRD1	protein_coding	#N/A	178	206	208	269	247	293	232	184	173
ENSG00000055118	KCNH2	protein_coding	Q12809	36	49	29	20	26	18	42	37	37
ENSG00000055130	CUL1	protein_coding	Q13616	2314	3193	2737	3509	2712	3796	2808	3179	2541
ENSG00000055147	FAM114A2	protein_coding	Q9NRY5	297	437	420	474	367	343	500	451	381
ENSG00000055163	CYFIP2	protein_coding	Q96F07	572	736	584	844	593	801	640	679	524
ENSG00000055208	TAB2	protein_coding	Q9NYJ8	339	422	372	581	415	499	391	331	283
ENSG00000055211	GINM1	protein_coding	Q9NU53	265	350	357	479	347	426	355	299	317
ENSG00000055332	EIF2AK2	protein_coding	P19525	679	928	851	1313	971	1163	918	970	773
ENSG00000055483	USP36	protein_coding	Q9P275	1033	1244	1050	1181	1127	1361	971	855	825
ENSG00000055609	KMT2C	protein_coding	Q8NEZ4	859	1140	918	1359	1177	1368	772	793	702
ENSG00000055732	MCOLN3	protein_coding	Q8TDD5	135	161	125	221	182	216	104	115	88
ENSG00000055813	CCDC85A	protein_coding	#N/A	1	0	0	0	0	0	4	2	0
ENSG00000055917	PUM2	protein_coding	Q8TB72	688	908	865	1234	932	1005	817	814	684
ENSG00000055950	MRPL43	protein_coding	Q8N983	1378	1763	1627	1119	886	1438	1708	1914	1570
ENSG00000055955	ITIH4	protein_coding	Q14624	0	2	0	1	1	1	2	0	0
ENSG00000055957	ITIH1	protein_coding	P19827	4	5	2	9	3	8	7	6	1
ENSG00000056050	HPF1	protein_coding	Q9NWY4	256	317	332	432	276	332	357	302	281
ENSG00000056097	ZFR	protein_coding	Q96KR1	1793	2407	2151	2669	1944	2393	2397	2436	2130
ENSG00000056277	ZNF280C	protein_coding	Q8ND82	712	985	882	1341	994	1230	1047	975	877
ENSG00000056291	NPFFR2	protein_coding	Q9Y5X5	4	3	2	6	1	5	7	1	1
ENSG00000056487	PHF21B	protein_coding	Q96EK2	94	125	83	74	60	94	84	77	80
ENSG00000056558	TRAF1	protein_coding	Q13077	17	26	37	26	21	23	13	21	19
ENSG00000056586	RC3H2	protein_coding	Q9HBD1	384	473	415	670	624	641	400	404	363
ENSG00000056736	IL17RB	protein_coding	Q9NRM6	80	95	70	94	57	83	87	93	51
ENSG00000056972	TRAF3IP2	protein_coding	O43734	48	67	54	46	55	69	67	68	61
ENSG00000056998	GYG2	protein_coding	O15488	57	62	70	80	70	92	95	83	65
ENSG00000057019	DCBLD2	protein_coding	Q96PD2	164	232	215	251	175	229	203	137	147
ENSG00000057149	SERPINB3	protein_coding	P29508	0	0	0	0	0	0	0	0	0
ENSG00000057252	SOAT1	protein_coding	P35610	1581	2467	1921	2285	1657	2131	1725	1824	1565
ENSG00000057294	PKP2	protein_coding	Q99959	118	149	114	180	113	130	171	137	134
ENSG00000057468	MSH4	protein_coding	O15457	11	18	5	18	11	7	6	3	7
ENSG00000057593	F7	protein_coding	P08709	0	0	0	0	0	3	0	0	0
ENSG00000057608	GDI2	protein_coding	P50395	1548	1904	1764	2765	1980	2246	2031	1796	1589
ENSG00000057657	PRDM1	protein_coding	O75626	5	9	10	4	2	6	5	3	4
ENSG00000057663	ATG5	protein_coding	Q9H1Y0	222	333	251	400	271	327	295	260	233
ENSG00000057704	TMCC3	protein_coding	Q9ULS5	19	43	26	28	25	32	27	44	35
ENSG00000057757	PITHD1	protein_coding	Q9GZP4	164	225	307	419	293	399	338	327	266
ENSG00000057935	MTA3	protein_coding	Q9BTC8	261	435	436	505	365	431	414	415	334
ENSG00000058056	USP13	protein_coding	Q92995	145	187	157	240	203	199	170	173	153
ENSG00000058063	ATP11B	protein_coding	Q9Y2G3	165	201	209	333	252	339	174	168	132
ENSG00000058085	LAMC2	protein_coding	Q13753	8	18	25	36	18	16	20	16	13
ENSG00000058091	CDK14	protein_coding	O94921	42	50	53	64	76	89	43	61	53
ENSG00000058262	SEC61A1	protein_coding	P61619	5883	8876	6592	4031	3051	3698	5121	5107	4468
ENSG00000058272	PPP1R12A	protein_coding	O14974	855	1116	959	1422	1045	1170	1194	1165	974
ENSG00000058335	RASGRF1	protein_coding	Q13972	0	5	2	3	1	2	4	2	0
ENSG00000058404	CAMK2B	protein_coding	Q13554	41	45	38	21	21	27	22	30	22
ENSG00000058453	CROCC	protein_coding	Q5TZA2	74	70	70	94	47	64	65	57	71
ENSG00000058600	POLR3E	protein_coding	Q9NVU0	514	685	580	657	467	585	577	562	432
ENSG00000058668	ATP2B4	protein_coding	P23634	532	737	604	697	475	564	567	522	407
ENSG00000058673	ZC3H11A	protein_coding	O75152	447	503	436	965	581	724	632	615	645
ENSG00000058729	RIOK2	protein_coding	Q9BVS4	811	1062	991	1968	1424	1594	1428	1414	1189
ENSG00000058799	YIPF1	protein_coding	Q9Y548	100	152	98	136	99	111	124	106	79
ENSG00000058804	NDC1	protein_coding	Q9BTX1	668	1071	892	1065	872	1040	827	742	698
ENSG00000058866	DGKG	protein_coding	P49619	0	0	0	0	0	0	0	1	1
ENSG00000059122	FLYWCH1	protein_coding	Q4VC44	520	625	536	375	273	395	524	589	495
ENSG00000059145	UNKL	protein_coding	Q9H9P5	197	199	200	135	126	112	191	172	161
ENSG00000059377	TBXAS1	protein_coding	P24557	20	24	18	18	12	11	25	23	18
ENSG00000059378	PARP12	protein_coding	Q9H0J9	3	3	3	5	3	6	5	4	3
ENSG00000059573	ALDH18A1	protein_coding	P54886	1581	2117	1912	2300	1785	2085	2219	1880	1649
ENSG00000059588	TARBP1	protein_coding	Q13395	650	863	735	1110	803	1082	592	588	485
ENSG00000059691	GATB	protein_coding	O75879	295	366	275	307	230	228	354	364	249
ENSG00000059728	MXD1	protein_coding	Q05195	179	253	219	261	232	233	284	233	227
ENSG00000059758	CDK17	protein_coding	Q00537	184	231	189	354	274	311	265	228	192
ENSG00000059769	DNAJC25	protein_coding	Q9H1X3	331	437	333	290	193	258	356	290	301
ENSG00000059804	SLC2A3	protein_coding	P11169	83	114	83	79	44	81	89	105	74
ENSG00000059915	PSD	protein_coding	A5PKW4	28	38	35	26	41	27	34	35	20
ENSG00000060069	CTDP1	protein_coding	Q9Y5B0	52	55	37	33	40	44	34	31	26
ENSG00000060138	YBX3	protein_coding	P16989	2742	3844	3342	2927	2561	3133	3690	3486	2892
ENSG00000060140	STYK1	protein_coding	Q6J9G0	10	7	17	11	14	7	5	8	9
ENSG00000060237	WNK1	protein_coding	Q9H4A3	1236	1713	1474	1929	1548	1819	1563	1440	1213
ENSG00000060303	RPS17P5	processed_pseudogene	#N/A	1	1	2	6	2	1	4	3	3
ENSG00000060339	CCAR1	protein_coding	Q8IX12	2219	2517	2258	3690	2578	3143	2730	2614	2033
ENSG00000060491	OGFR	protein_coding	Q9NZT2	268	295	280	278	209	266	363	327	249
ENSG00000060558	GNA15	protein_coding	P30679	0	0	2	0	2	0	0	2	0
ENSG00000060566	CREB3L3	protein_coding	Q68CJ9	1	0	1	0	0	0	0	1	0
ENSG00000060642	PIGV	protein_coding	Q9NUD9	94	132	88	124	99	124	87	92	84
ENSG00000060656	PTPRU	protein_coding	Q92729	370	416	377	287	280	298	334	291	279
ENSG00000060688	SNRNP40	protein_coding	Q96DI7	899	1185	1095	1437	979	1323	1254	1190	1000
ENSG00000060709	RIMBP2	protein_coding	O15034	1	2	0	0	1	1	0	0	0
ENSG00000060718	COL11A1	protein_coding	P12107	1	1	2	1	0	1	0	0	0
ENSG00000060749	QSER1	protein_coding	#N/A	289	467	439	711	530	650	428	398	341
ENSG00000060762	MPC1	protein_coding	Q9Y5U8	403	477	481	556	443	524	555	503	444
ENSG00000060971	ACAA1	protein_coding	P09110	1668	2181	1646	1036	818	1147	1712	1821	1567
ENSG00000060982	BCAT1	protein_coding	P54687	911	1191	1139	1451	1033	1233	1057	1005	869
ENSG00000061273	HDAC7	protein_coding	Q8WUI4	196	274	228	178	151	162	195	180	190
ENSG00000061337	LZTS1	protein_coding	Q9Y250	9	2	6	6	5	8	8	11	4
ENSG00000061455	PRDM6	protein_coding	Q9NQX0	38	78	70	70	60	70	76	53	41
ENSG00000061492	WNT8A	protein_coding	Q9H1J5	0	0	0	0	0	1	0	3	0
ENSG00000061656	SPAG4	protein_coding	Q9NPE6	27	31	21	24	22	27	34	20	10
ENSG00000061676	NCKAP1	protein_coding	Q9Y2A7	1647	2627	2229	2065	1624	2048	2130	2056	1934
ENSG00000061794	MRPS35	protein_coding	P82673	541	716	675	844	550	687	701	688	581
ENSG00000061918	GUCY1B3	protein_coding	#N/A	190	245	199	244	156	200	261	234	204
ENSG00000061936	SFSWAP	protein_coding	Q12872	495	569	569	626	480	550	580	485	437
ENSG00000061938	TNK2	protein_coding	Q07912	291	339	252	193	186	190	217	242	229
ENSG00000061987	MON2	protein_coding	Q7Z3U7	474	626	553	771	556	634	488	461	341
ENSG00000062038	CDH3	protein_coding	P22223	8	13	7	7	3	6	6	4	5
ENSG00000062096	ARSF	protein_coding	P54793	0	0	0	0	0	0	0	0	0
ENSG00000062194	GPBP1	protein_coding	Q86WP2	944	1063	961	1399	970	1141	1160	1164	984
ENSG00000062282	DGAT2	protein_coding	Q96PD7	9	16	10	10	6	6	14	8	15
ENSG00000062370	ZNF112	protein_coding	Q9UJU3	12	16	15	16	20	20	11	10	15
ENSG00000062485	CS	protein_coding	O75390	1271	1676	1479	1864	1545	1684	1643	1486	1248
ENSG00000062524	LTK	protein_coding	P29376	25	27	39	21	16	18	21	24	18
ENSG00000062582	MRPS24	protein_coding	Q96EL2	26	29	39	18	12	16	29	21	31
ENSG00000062598	ELMO2	protein_coding	Q96JJ3	478	663	560	443	352	426	652	569	474
ENSG00000062650	WAPL	protein_coding	Q7Z5K2	1511	1866	1584	2723	1962	2240	1910	1843	1567
ENSG00000062716	VMP1	protein_coding	Q96GC9	2895	4005	3908	6495	4694	6634	3612	3946	3270
ENSG00000062725	APPBP2	protein_coding	Q92624	789	1114	923	996	735	944	1138	1116	986
ENSG00000062822	POLD1	protein_coding	P28340	488	584	558	453	296	392	539	488	393
ENSG00000063015	SEZ6	protein_coding	Q53EL9	4	2	0	1	6	1	1	1	1
ENSG00000063046	EIF4B	protein_coding	P23588	275	464	455	426	374	396	494	400	341
ENSG00000063127	SLC6A16	protein_coding	Q9GZN6	35	43	46	27	25	28	24	31	19
ENSG00000063169	GLTSCR1	protein_coding	#N/A	197	232	198	177	157	198	168	154	145
ENSG00000063176	SPHK2	protein_coding	Q9NRA0	118	182	140	102	61	112	112	104	98
ENSG00000063177	RPL18	protein_coding	Q07020	4268	5315	5005	2760	2385	2436	5535	4889	4643
ENSG00000063180	CA11	protein_coding	O75493	107	105	83	73	61	67	97	104	81
ENSG00000063241	ISOC2	protein_coding	Q96AB3	284	387	366	279	185	199	293	304	258
ENSG00000063244	U2AF2	protein_coding	P26368	3368	4362	3855	3318	2573	2880	4402	4229	3487
ENSG00000063245	EPN1	protein_coding	Q9Y6I3	625	716	569	515	391	434	512	462	397
ENSG00000063322	MED29	protein_coding	Q9NX70	243	372	344	365	282	306	365	314	315
ENSG00000063438	AHRR	protein_coding	A9YTQ3	168	276	214	224	167	219	213	163	161
ENSG00000063515	GSC2	protein_coding	O15499	2	0	1	0	0	3	0	0	0
ENSG00000063587	ZNF275	protein_coding	Q9NSD4	243	264	241	251	231	310	226	240	214
ENSG00000063601	MTMR1	protein_coding	Q13613	451	702	558	583	423	536	549	533	469
ENSG00000063660	GPC1	protein_coding	P35052	244	262	246	171	151	157	273	237	202
ENSG00000063761	ADCK1	protein_coding	Q86TW2	160	279	217	169	109	184	149	170	137
ENSG00000063854	HAGH	protein_coding	Q16775	555	686	618	290	233	287	621	543	457
ENSG00000063978	RNF4	protein_coding	P78317	308	391	388	400	299	389	338	318	299
ENSG00000064012	CASP8	protein_coding	Q14790	196	301	260	250	193	230	317	322	245
ENSG00000064042	LIMCH1	protein_coding	Q9UPQ0	31	43	28	47	19	28	42	35	33
ENSG00000064102	ASUN	protein_coding	#N/A	1052	1245	1163	1700	1363	1607	1264	1227	865
ENSG00000064115	TM7SF3	protein_coding	Q9NS93	193	254	277	256	208	251	255	214	180
ENSG00000064195	DLX3	protein_coding	O60479	6	13	4	15	4	3	13	4	2
ENSG00000064199	SPA17	protein_coding	Q15506	26	36	50	66	60	62	73	60	44
ENSG00000064201	TSPAN32	protein_coding	Q96QS1	0	1	0	1	0	0	0	0	0
ENSG00000064205	WISP2	protein_coding	O76076	4	4	1	4	2	0	0	0	0
ENSG00000064218	DMRT3	protein_coding	Q9NQL9	2	4	8	2	1	4	6	5	4
ENSG00000064225	ST3GAL6	protein_coding	Q9Y274	75	102	87	84	71	66	91	73	59
ENSG00000064270	ATP2C2	protein_coding	O75185	4	4	0	4	1	0	5	2	3
ENSG00000064300	NGFR	protein_coding	P08138	4	4	9	3	4	3	8	10	5
ENSG00000064309	CDON	protein_coding	Q4KMG0	300	389	299	300	259	303	263	268	243
ENSG00000064313	TAF2	protein_coding	Q6P1X5	547	840	636	915	719	836	564	585	508
ENSG00000064393	HIPK2	protein_coding	Q9H2X6	432	590	445	579	604	621	451	405	397
ENSG00000064419	TNPO3	protein_coding	Q9Y5L0	741	947	846	1047	850	869	792	702	552
ENSG00000064489	BORCS8-MEF2B	protein_coding	H3BNR1	0	0	1	0	0	0	0	0	0
ENSG00000064490	RFXANK	protein_coding	O14593	255	330	246	161	122	125	265	212	204
ENSG00000064545	TMEM161A	protein_coding	Q9NX61	1015	1306	1077	645	471	536	853	819	765
ENSG00000064547	LPAR2	protein_coding	Q9HBW0	19	17	17	11	7	14	7	13	9
ENSG00000064601	CTSA	protein_coding	P10619	218	277	254	178	143	162	201	186	148
ENSG00000064607	SUGP2	protein_coding	Q8IX01	1220	1454	1281	1430	1107	1326	1210	1179	1014
ENSG00000064651	SLC12A2	protein_coding	P55011	447	589	532	741	521	631	473	458	370
ENSG00000064652	SNX24	protein_coding	Q9Y343	15	27	27	61	45	49	37	32	30
ENSG00000064655	EYA2	protein_coding	O00167	36	41	42	50	33	36	53	46	44
ENSG00000064666	CNN2	protein_coding	Q99439	289	428	427	305	282	328	481	508	438
ENSG00000064687	ABCA7	protein_coding	Q8IZY2	152	189	122	113	65	78	123	110	90
ENSG00000064692	SNCAIP	protein_coding	Q9Y6H5	15	16	13	18	9	22	15	18	12
ENSG00000064703	DDX20	protein_coding	Q9UHI6	858	1164	1168	1446	1079	1371	1127	1172	941
ENSG00000064726	BTBD1	protein_coding	Q9H0C5	828	1071	899	991	766	930	910	890	749
ENSG00000064763	FAR2	protein_coding	Q96K12	240	388	307	310	215	234	338	351	269
ENSG00000064787	BCAS1	protein_coding	O75363	0	2	0	0	2	1	2	1	2
ENSG00000064835	POU1F1	protein_coding	P28069	0	0	0	0	0	0	0	0	0
ENSG00000064886	CHI3L2	protein_coding	Q15782	0	0	0	1	0	0	0	0	0
ENSG00000064932	SBNO2	protein_coding	Q9Y2G9	5	2	5	3	5	4	1	0	1
ENSG00000064933	PMS1	protein_coding	P54277	296	407	345	514	354	441	387	322	289
ENSG00000064961	HMG20B	protein_coding	Q9P0W2	142	173	185	197	143	179	192	158	139
ENSG00000064989	CALCRL	protein_coding	Q16602	8	11	14	18	18	21	18	17	8
ENSG00000064995	TAF11	protein_coding	Q15544	198	300	214	176	169	170	201	202	207
ENSG00000064999	ANKS1A	protein_coding	Q92625	388	462	423	397	391	395	425	406	367
ENSG00000065000	AP3D1	protein_coding	O14617	3121	3712	3219	3439	2963	3498	2955	2826	2498
ENSG00000065029	ZNF76	protein_coding	P36508	180	236	180	174	138	176	177	132	118
ENSG00000065054	SLC9A3R2	protein_coding	Q15599	167	193	155	182	151	188	166	170	112
ENSG00000065057	NTHL1	protein_coding	P78549	353	428	361	298	221	299	445	460	382
ENSG00000065060	UHRF1BP1	protein_coding	Q6BDS2	293	394	337	483	392	435	329	287	276
ENSG00000065135	GNAI3	protein_coding	P08754	1060	1272	1217	2048	1398	1706	1458	1302	1093
ENSG00000065150	IPO5	protein_coding	O00410	8261	11863	8257	11483	9158	12040	8366	9840	7086
ENSG00000065154	OAT	protein_coding	P04181	3432	4844	3892	3535	2824	3250	4916	4786	4315
ENSG00000065183	WDR3	protein_coding	Q9UNX4	1307	1744	1665	2153	1507	1790	1915	1697	1446
ENSG00000065243	PKN2	protein_coding	Q16513	729	931	766	1291	960	1047	825	729	645
ENSG00000065268	WDR18	protein_coding	Q9BV38	590	874	783	635	485	625	682	752	623
ENSG00000065308	TRAM2	protein_coding	Q15035	161	281	209	71	75	79	167	175	147
ENSG00000065320	NTN1	protein_coding	O95631	152	180	163	151	102	133	153	130	125
ENSG00000065325	GLP2R	protein_coding	O95838	0	0	0	0	0	0	0	0	0
ENSG00000065328	MCM10	protein_coding	Q7L590	2415	2996	2615	3235	2358	2836	3606	3449	2799
ENSG00000065357	DGKA	protein_coding	P23743	67	107	70	102	88	91	88	88	85
ENSG00000065361	ERBB3	protein_coding	P21860	50	73	46	86	63	85	69	76	43
ENSG00000065371	ROPN1	protein_coding	Q9HAT0	0	0	0	0	2	0	0	0	0
ENSG00000065413	ANKRD44	protein_coding	Q8N8A2	4	9	6	6	4	9	7	5	7
ENSG00000065427	KARS	protein_coding	Q15046	1676	2323	2096	2206	1606	1991	2354	2154	1856
ENSG00000065457	ADAT1	protein_coding	Q9BUB4	152	193	177	286	228	299	183	175	131
ENSG00000065485	PDIA5	protein_coding	Q14554	736	1163	967	704	565	599	817	798	695
ENSG00000065491	TBC1D22B	protein_coding	Q9NU19	123	150	155	242	174	257	138	175	120
ENSG00000065518	NDUFB4	protein_coding	O95168	491	815	739	492	383	347	782	751	578
ENSG00000065526	SPEN	protein_coding	Q96T58	4508	4740	4115	5666	4363	6035	4839	5001	3799
ENSG00000065534	MYLK	protein_coding	Q15746	41	47	56	63	62	53	60	49	39
ENSG00000065548	ZC3H15	protein_coding	Q8WU90	1168	1496	1298	2421	1686	1980	1744	1570	1261
ENSG00000065559	MAP2K4	protein_coding	P45985	111	171	144	295	192	246	197	206	141
ENSG00000065600	TMEM206	protein_coding	Q9H813	337	535	393	234	182	198	327	319	282
ENSG00000065609	SNAP91	protein_coding	O60641	51	59	45	62	62	51	48	46	51
ENSG00000065613	SLK	protein_coding	Q9H2G2	1562	1988	1628	2499	1697	2075	2081	2070	1774
ENSG00000065615	CYB5R4	protein_coding	Q7L1T6	48	87	72	139	126	121	119	79	70
ENSG00000065618	COL17A1	protein_coding	Q9UMD9	0	2	2	2	2	3	5	1	1
ENSG00000065621	GSTO2	protein_coding	Q9H4Y5	18	42	37	34	38	25	38	37	48
ENSG00000065665	SEC61A2	protein_coding	Q9H9S3	318	510	467	499	392	445	414	406	328
ENSG00000065675	PRKCQ	protein_coding	Q04759	141	140	130	167	112	169	185	194	137
ENSG00000065717	TLE2	protein_coding	Q04725	42	54	39	31	22	28	56	48	50
ENSG00000065802	ASB1	protein_coding	Q9Y576	186	211	238	199	163	184	156	153	144
ENSG00000065809	FAM107B	protein_coding	#N/A	87	135	110	221	154	194	176	155	140
ENSG00000065833	ME1	protein_coding	P48163	383	642	541	553	358	449	605	635	526
ENSG00000065882	TBC1D1	protein_coding	Q86TI0	102	183	130	133	92	123	118	113	118
ENSG00000065883	CDK13	protein_coding	Q14004	379	373	353	638	472	614	425	421	317
ENSG00000065911	MTHFD2	protein_coding	P13995	1681	3158	2846	2868	2046	2562	3038	2813	2740
ENSG00000065923	SLC9A7	protein_coding	Q96T83	262	317	272	309	184	273	281	275	210
ENSG00000065970	FOXJ2	protein_coding	Q9P0K8	217	319	240	227	144	182	270	277	245
ENSG00000065978	YBX1	protein_coding	P67809	954	1447	1240	1141	880	1020	1426	1171	1111
ENSG00000065989	PDE4A	protein_coding	P27815	33	54	38	41	33	38	32	34	34
ENSG00000066027	PPP2R5A	protein_coding	Q15172	464	730	478	356	274	319	498	534	510
ENSG00000066032	CTNNA2	protein_coding	P26232	0	0	0	0	0	0	0	1	0
ENSG00000066044	ELAVL1	protein_coding	Q15717	2769	3510	3264	2996	2382	2564	3729	3205	2739
ENSG00000066056	TIE1	protein_coding	P35590	1	1	0	0	0	2	0	0	0
ENSG00000066084	DIP2B	protein_coding	Q9P265	683	835	798	997	700	848	831	862	678
ENSG00000066117	SMARCD1	protein_coding	Q96GM5	896	1182	1141	758	658	810	1198	1190	1113
ENSG00000066135	KDM4A	protein_coding	O75164	829	1089	958	1296	889	1083	907	912	797
ENSG00000066136	NFYC	protein_coding	Q13952	183	312	299	351	282	318	336	313	247
ENSG00000066185	ZMYND12	protein_coding	Q9H0C1	3	13	6	3	8	4	7	5	4
ENSG00000066230	SLC9A3	protein_coding	P48764	27	38	24	11	5	18	14	17	23
ENSG00000066248	NGEF	protein_coding	Q8N5V2	79	95	93	48	65	70	80	93	78
ENSG00000066279	ASPM	protein_coding	Q8IZT6	467	599	481	1004	741	953	459	443	374
ENSG00000066294	CD84	protein_coding	Q9UIB8	0	0	1	0	0	0	0	0	0
ENSG00000066322	ELOVL1	protein_coding	Q9BW60	536	738	606	355	294	300	518	534	422
ENSG00000066336	SPI1	protein_coding	P17947	2	2	1	0	1	1	0	1	1
ENSG00000066379	ZNRD1	protein_coding	Q9P1U0	0	2	2	0	1	0	0	0	1
ENSG00000066382	MPPED2	protein_coding	Q15777	14	20	21	18	21	23	12	14	15
ENSG00000066405	CLDN18	protein_coding	P56856	0	1	5	5	7	2	0	1	1
ENSG00000066422	ZBTB11	protein_coding	O95625	313	505	401	640	492	549	466	387	295
ENSG00000066427	ATXN3	protein_coding	P54252	219	266	257	317	245	283	306	252	237
ENSG00000066455	GOLGA5	protein_coding	Q8TBA6	792	1155	880	1281	1019	1375	1037	1188	887
ENSG00000066468	FGFR2	protein_coding	P21802	128	157	129	195	161	182	126	119	111
ENSG00000066557	LRRC40	protein_coding	Q9H9A6	1250	1647	1617	2015	1569	1891	1706	1757	1495
ENSG00000066583	ISOC1	protein_coding	Q96CN7	302	403	442	253	212	219	393	336	276
ENSG00000066629	EML1	protein_coding	O00423	108	141	166	159	130	163	126	152	123
ENSG00000066651	TRMT11	protein_coding	Q7Z4G4	185	273	252	483	334	398	301	218	188
ENSG00000066654	THUMPD1	protein_coding	Q9NXG2	241	298	293	369	239	337	351	288	251
ENSG00000066697	MSANTD3	protein_coding	Q96H12	56	71	74	123	120	138	76	71	50
ENSG00000066735	KIF26A	protein_coding	Q9ULI4	77	118	110	110	69	119	90	82	71
ENSG00000066739	ATG2B	protein_coding	Q96BY7	376	488	442	675	528	660	423	350	345
ENSG00000066777	ARFGEF1	protein_coding	Q9Y6D6	350	499	444	736	578	579	373	356	309
ENSG00000066813	ACSM2B	protein_coding	Q68CK6	0	0	0	0	0	0	0	0	0
ENSG00000066827	ZFAT	protein_coding	Q9P243	69	81	100	100	57	71	93	79	79
ENSG00000066855	MTFR1	protein_coding	Q15390	295	379	327	484	345	381	349	353	257
ENSG00000066923	STAG3	protein_coding	Q9UJ98	10	18	6	6	5	7	3	5	5
ENSG00000066926	FECH	protein_coding	P22830	218	277	310	247	170	213	312	243	230
ENSG00000066933	MYO9A	protein_coding	B2RTY4	360	484	376	565	438	541	467	367	311
ENSG00000067048	DDX3Y	protein_coding	O15523	3	5	4	7	4	3	5	2	1
ENSG00000067057	PFKP	protein_coding	Q01813	356	510	476	469	414	448	485	402	341
ENSG00000067064	IDI1	protein_coding	Q13907	675	982	857	1384	961	1064	1285	1110	1008
ENSG00000067066	SP100	protein_coding	P23497	1	0	1	1	2	0	0	0	1
ENSG00000067082	KLF6	protein_coding	Q99612	574	770	732	606	510	580	750	752	655
ENSG00000067113	PLPP1	protein_coding	O14494	266	363	241	140	100	110	230	223	207
ENSG00000067141	NEO1	protein_coding	Q92859	612	884	757	614	558	509	638	636	443
ENSG00000067167	TRAM1	protein_coding	Q15629	2172	3220	2703	2894	2286	2595	2837	2700	2445
ENSG00000067177	PHKA1	protein_coding	P46020	279	353	335	514	383	461	347	270	299
ENSG00000067182	TNFRSF1A	protein_coding	P19438	401	564	470	516	398	397	531	468	368
ENSG00000067191	CACNB1	protein_coding	Q02641	50	68	53	48	40	61	38	39	38
ENSG00000067208	EVI5	protein_coding	O60447	284	280	286	442	323	382	262	264	229
ENSG00000067221	STOML1	protein_coding	Q9UBI4	93	99	102	72	62	75	119	93	74
ENSG00000067225	PKM	protein_coding	P14618	42848	50658	38991	39714	29766	45407	48750	54306	43908
ENSG00000067248	DHX29	protein_coding	Q7Z478	621	803	821	1328	964	1193	852	796	704
ENSG00000067334	DNTTIP2	protein_coding	Q5QJE6	1711	2459	2022	2690	2045	2521	3171	3127	2432
ENSG00000067365	METTL22	protein_coding	Q9BUU2	154	168	164	159	144	162	137	119	97
ENSG00000067369	TP53BP1	protein_coding	Q12888	924	1244	1050	1440	1170	1363	1133	986	884
ENSG00000067445	TRO	protein_coding	Q12816	201	235	216	295	192	248	218	185	187
ENSG00000067533	RRP15	protein_coding	Q9Y3B9	668	977	860	1277	955	1059	975	901	602
ENSG00000067560	RHOA	protein_coding	P61586	7309	9339	8198	5984	4427	5450	9964	9270	7280
ENSG00000067596	DHX8	protein_coding	Q14562	1060	1347	1291	1501	1039	1266	1528	1447	1190
ENSG00000067601	PMS2P4	transcribed_unprocessed_pseudogene	#N/A	30	46	39	35	31	31	52	27	48
ENSG00000067606	PRKCZ	protein_coding	Q05513	224	260	217	180	128	155	223	202	178
ENSG00000067646	ZFY	protein_coding	P08048	2	0	1	0	0	3	3	2	2
ENSG00000067704	IARS2	protein_coding	Q9NSE4	1084	1514	1309	2695	1802	2191	1574	1414	1119
ENSG00000067715	SYT1	protein_coding	P21579	186	182	113	131	99	131	196	171	91
ENSG00000067798	NAV3	protein_coding	Q8IVL0	2	11	4	4	0	4	7	1	6
ENSG00000067829	IDH3G	protein_coding	P51553	370	450	454	474	337	425	492	409	355
ENSG00000067836	ROGDI	protein_coding	Q9GZN7	76	153	116	82	59	73	123	98	79
ENSG00000067840	PDZD4	protein_coding	Q76G19	38	70	37	44	30	33	38	36	32
ENSG00000067842	ATP2B3	protein_coding	Q16720	6	2	5	1	1	3	2	5	3
ENSG00000067900	ROCK1	protein_coding	Q13464	946	1120	923	1622	1189	1454	1050	979	828
ENSG00000067955	CBFB	protein_coding	Q13951	336	421	417	552	397	446	526	431	375
ENSG00000067992	PDK3	protein_coding	Q15120	286	411	377	482	327	380	391	349	268
ENSG00000068001	HYAL2	protein_coding	Q12891	104	114	123	71	73	72	95	89	78
ENSG00000068024	HDAC4	protein_coding	P56524	119	171	126	108	105	113	114	140	88
ENSG00000068028	RASSF1	protein_coding	Q9NS23	476	667	552	482	371	483	675	636	602
ENSG00000068078	FGFR3	protein_coding	P22607	259	245	232	198	129	165	208	186	134
ENSG00000068079	IFI35	protein_coding	P80217	17	37	20	14	16	14	25	30	23
ENSG00000068097	HEATR6	protein_coding	Q6AI08	897	1285	1119	634	526	644	1086	1157	959
ENSG00000068120	COASY	protein_coding	Q13057	692	830	802	677	494	633	759	663	575
ENSG00000068137	PLEKHH3	protein_coding	Q7Z736	263	337	268	210	168	178	300	242	243
ENSG00000068305	MEF2A	protein_coding	Q02078	1157	1865	1287	1960	1457	2094	1484	1904	1528
ENSG00000068308	OTUD5	protein_coding	Q96G74	611	755	668	543	399	468	584	575	538
ENSG00000068323	TFE3	protein_coding	P19532	529	645	525	379	349	417	509	493	475
ENSG00000068354	TBC1D25	protein_coding	Q3MII6	217	318	241	247	192	218	208	241	174
ENSG00000068366	ACSL4	protein_coding	O60488	429	484	455	822	563	687	537	506	420
ENSG00000068383	INPP5A	protein_coding	Q14642	439	646	405	260	221	317	414	599	454
ENSG00000068394	GPKOW	protein_coding	Q92917	439	541	473	526	375	474	601	548	527
ENSG00000068400	GRIPAP1	protein_coding	Q4V328	437	550	500	560	464	504	490	455	365
ENSG00000068438	FTSJ1	protein_coding	Q9UET6	592	758	644	660	495	586	682	681	569
ENSG00000068489	PRR11	protein_coding	Q96HE9	185	267	207	215	176	203	262	199	202
ENSG00000068615	REEP1	protein_coding	Q9H902	78	110	94	125	70	118	94	102	72
ENSG00000068650	ATP11A	protein_coding	P98196	131	184	193	230	184	242	145	158	131
ENSG00000068654	POLR1A	protein_coding	O95602	1786	2114	1906	1936	1609	1824	1850	1745	1394
ENSG00000068697	LAPTM4A	protein_coding	Q15012	1850	2847	2400	2148	1544	1791	2310	2149	1941
ENSG00000068724	TTC7A	protein_coding	Q9ULT0	60	65	80	59	51	59	64	53	43
ENSG00000068745	IP6K2	protein_coding	Q9UHH9	1802	2371	2157	2692	1907	2440	3077	3167	2780
ENSG00000068781	STON1-GTF2A1L	protein_coding	Q53S48	0	0	0	0	1	0	0	0	0
ENSG00000068784	SRBD1	protein_coding	Q8N5C6	573	719	656	1099	707	863	742	684	590
ENSG00000068796	KIF2A	protein_coding	O00139	630	904	855	1318	1066	1203	1005	1002	709
ENSG00000068831	RASGRP2	protein_coding	Q7LDG7	23	20	24	17	14	12	20	24	9
ENSG00000068878	PSME4	protein_coding	Q14997	652	956	829	1261	1010	1110	791	779	680
ENSG00000068885	IFT80	protein_coding	Q9P2H3	164	243	196	327	203	232	185	179	203
ENSG00000068903	SIRT2	protein_coding	Q8IXJ6	0	0	0	0	0	0	0	0	0
ENSG00000068912	ERLEC1	protein_coding	Q96DZ1	284	402	392	576	440	467	374	293	267
ENSG00000068971	PPP2R5B	protein_coding	Q15173	159	197	177	135	130	130	122	121	104
ENSG00000068976	PYGM	protein_coding	P11217	29	34	33	35	21	37	34	25	22
ENSG00000068985	PAGE1	protein_coding	O75459	0	0	0	0	1	0	0	0	0
ENSG00000069011	PITX1	protein_coding	P78337	230	335	257	249	234	260	230	224	213
ENSG00000069018	TRPC7	protein_coding	Q9HCX4	0	0	0	0	0	3	0	0	1
ENSG00000069020	MAST4	protein_coding	O15021	84	62	80	103	77	103	67	84	78
ENSG00000069122	ADGRF5	protein_coding	Q8IZF2	0	1	1	3	2	1	1	2	2
ENSG00000069188	SDK2	protein_coding	Q58EX2	182	256	171	215	165	170	172	149	115
ENSG00000069206	ADAM7	protein_coding	Q9H2U9	0	0	0	0	0	0	0	0	0
ENSG00000069248	NUP133	protein_coding	Q8WUM0	2676	3710	3302	4793	3608	4203	3602	3235	2854
ENSG00000069275	NUCKS1	protein_coding	Q9H1E3	17724	20745	16784	20825	15510	21312	21368	24130	19177
ENSG00000069329	VPS35	protein_coding	Q96QK1	1472	2002	1808	2200	1656	1806	2065	1828	1699
ENSG00000069345	DNAJA2	protein_coding	O60884	1532	2015	1598	2480	1914	2209	2134	2061	1642
ENSG00000069399	BCL3	protein_coding	P20749	2	11	5	6	5	5	4	10	7
ENSG00000069424	KCNAB2	protein_coding	Q13303	22	23	25	24	20	18	25	15	10
ENSG00000069431	ABCC9	protein_coding	O60706	5	7	8	6	9	6	9	2	1
ENSG00000069482	GAL	protein_coding	P22466	421	524	561	360	290	308	547	439	420
ENSG00000069493	CLEC2D	protein_coding	Q9UHP7	4	8	12	26	11	20	11	10	7
ENSG00000069509	FUNDC1	protein_coding	Q8IVP5	445	451	553	673	458	575	577	530	399
ENSG00000069535	MAOB	protein_coding	P27338	6	3	3	4	4	3	6	5	6
ENSG00000069667	RORA	protein_coding	P35398	38	67	42	85	73	66	58	47	53
ENSG00000069696	DRD4	protein_coding	P21917	0	0	0	0	0	0	0	0	0
ENSG00000069702	TGFBR3	protein_coding	Q03167	159	201	186	189	155	159	169	147	114
ENSG00000069712	KIAA1107	protein_coding	Q9UPP5	0	0	0	0	0	0	0	0	0
ENSG00000069764	PLA2G10	protein_coding	O15496	0	0	0	0	0	0	0	0	0
ENSG00000069812	HES2	protein_coding	Q9Y543	5	5	1	1	2	2	3	2	2
ENSG00000069849	ATP1B3	protein_coding	P54709	1097	1652	1578	1449	1051	1180	1549	1358	1052
ENSG00000069869	NEDD4	protein_coding	P46934	296	374	222	325	253	311	301	340	303
ENSG00000069943	PIGB	protein_coding	Q92521	28	30	49	42	31	26	27	28	20
ENSG00000069956	MAPK6	protein_coding	Q16659	501	534	427	331	236	256	449	386	360
ENSG00000069966	GNB5	protein_coding	O14775	173	190	171	128	91	109	208	205	141
ENSG00000069974	RAB27A	protein_coding	P51159	33	27	24	35	33	34	23	30	30
ENSG00000069998	CECR5	protein_coding	Q9BXW7	735	918	814	624	524	631	861	766	632
ENSG00000070010	UFD1L	protein_coding	#N/A	835	1157	1032	980	753	814	1245	1158	870
ENSG00000070018	LRP6	protein_coding	O75581	0	0	0	0	0	0	0	0	0
ENSG00000070019	GUCY2C	protein_coding	P25092	1	4	3	6	3	8	2	0	0
ENSG00000070031	SCT	protein_coding	P09683	0	0	0	0	0	0	0	0	0
ENSG00000070047	PHRF1	protein_coding	Q9P1Y6	18	6	17	11	14	21	3	4	18
ENSG00000070061	IKBKAP	protein_coding	#N/A	1843	2125	1940	2347	1836	2059	1980	1784	1594
ENSG00000070081	NUCB2	protein_coding	P80303	2815	3740	3312	3915	2585	3050	3020	2721	2379
ENSG00000070087	PFN2	protein_coding	P35080	1347	1643	1463	1825	1302	1513	1707	1562	1385
ENSG00000070159	PTPN3	protein_coding	P26045	207	238	197	185	170	175	210	193	181
ENSG00000070182	SPTB	protein_coding	P11277	112	105	106	127	93	116	112	87	80
ENSG00000070190	DAPP1	protein_coding	Q9UN19	0	0	0	1	1	1	2	0	0
ENSG00000070193	FGF10	protein_coding	O15520	0	0	0	0	0	0	0	0	0
ENSG00000070214	SLC44A1	protein_coding	Q8WWI5	166	226	219	262	140	237	228	211	146
ENSG00000070269	TMEM260	protein_coding	Q9NX78	76	111	87	104	77	108	89	85	68
ENSG00000070366	SMG6	protein_coding	Q86US8	592	700	563	604	517	623	667	598	460
ENSG00000070367	EXOC5	protein_coding	O00471	495	708	606	725	610	684	582	547	507
ENSG00000070371	CLTCL1	protein_coding	P53675	490	630	592	667	498	688	508	601	480
ENSG00000070388	FGF22	protein_coding	Q9HCT0	2	7	5	8	11	1	2	2	3
ENSG00000070404	FSTL3	protein_coding	O95633	23	31	19	24	30	20	22	13	17
ENSG00000070413	DGCR2	protein_coding	P98153	633	939	789	673	553	600	694	652	579
ENSG00000070423	RNF126	protein_coding	Q9BV68	655	757	549	434	383	454	585	571	479
ENSG00000070444	MNT	protein_coding	Q99583	159	190	159	165	149	154	165	127	117
ENSG00000070476	ZXDC	protein_coding	Q2QGD7	697	1014	830	667	595	655	691	705	587
ENSG00000070495	JMJD6	protein_coding	Q6NYC1	667	903	837	692	545	704	944	809	699
ENSG00000070501	POLB	protein_coding	P06746	239	377	377	451	276	367	371	318	281
ENSG00000070526	ST6GALNAC1	protein_coding	Q9NSC7	1	2	6	5	7	4	0	5	1
ENSG00000070540	WIPI1	protein_coding	Q5MNZ9	98	162	134	107	61	85	122	133	96
ENSG00000070601	FRMPD1	protein_coding	Q5SYB0	8	11	7	10	7	15	10	3	11
ENSG00000070610	GBA2	protein_coding	Q9HCG7	417	430	432	518	416	515	349	359	224
ENSG00000070614	NDST1	protein_coding	P52848	393	446	380	399	325	436	316	322	265
ENSG00000070669	ASNS	protein_coding	P08243	3067	4640	3874	5466	4218	4948	4802	4455	4217
ENSG00000070718	AP3M2	protein_coding	P53677	342	510	383	339	258	344	415	483	419
ENSG00000070729	CNGB1	protein_coding	Q14028	0	0	0	1	0	0	0	0	0
ENSG00000070731	ST6GALNAC2	protein_coding	Q9UJ37	11	5	7	5	7	17	7	11	7
ENSG00000070748	CHAT	protein_coding	P28329	0	0	0	0	0	0	0	0	0
ENSG00000070756	PABPC1	protein_coding	P11940	5808	7134	6814	7013	5437	6185	7282	6697	5862
ENSG00000070759	TESK2	protein_coding	Q96S53	28	61	20	50	46	50	27	37	43
ENSG00000070761	CFAP20	protein_coding	Q9Y6A4	688	1137	822	833	726	766	1171	1146	953
ENSG00000070770	CSNK2A2	protein_coding	P19784	1236	1657	1462	1717	1392	1569	1700	1639	1381
ENSG00000070778	PTPN21	protein_coding	Q16825	56	65	71	87	55	70	49	41	37
ENSG00000070785	EIF2B3	protein_coding	Q9NR50	906	1191	1076	1426	996	1168	1209	1181	1033
ENSG00000070808	CAMK2A	protein_coding	Q9UQM7	0	0	0	0	0	1	0	2	0
ENSG00000070814	TCOF1	protein_coding	Q13428	1382	1549	1539	1777	1068	1577	1708	1491	1082
ENSG00000070831	CDC42	protein_coding	P60953	577	1017	822	1036	828	854	982	1063	863
ENSG00000070882	OSBPL3	protein_coding	Q9H4L5	140	204	156	252	185	252	202	145	159
ENSG00000070886	EPHA8	protein_coding	P29322	37	22	36	20	17	20	28	26	17
ENSG00000070915	SLC12A3	protein_coding	P55017	0	1	2	0	0	3	0	0	0
ENSG00000070950	RAD18	protein_coding	Q9NS91	630	989	921	848	611	775	913	888	788
ENSG00000070961	ATP2B1	protein_coding	P20020	927	1141	1000	1190	834	978	926	700	683
ENSG00000070985	TRPM5	protein_coding	Q9NZQ8	2	8	4	2	1	3	1	1	1
ENSG00000071051	NCK2	protein_coding	O43639	46	74	90	117	103	116	96	74	100
ENSG00000071054	MAP4K4	protein_coding	O95819	686	908	758	931	722	841	844	787	617
ENSG00000071073	MGAT4A	protein_coding	Q9UM21	68	101	98	142	116	138	92	86	78
ENSG00000071082	RPL31	protein_coding	P62899	14419	18232	17368	7929	5905	7272	19152	18480	16187
ENSG00000071127	WDR1	protein_coding	O75083	982	1186	1041	1064	765	971	1144	1176	1052
ENSG00000071189	SNX13	protein_coding	Q9Y5W8	241	300	254	258	201	309	252	192	223
ENSG00000071203	MS4A12	protein_coding	Q9NXJ0	0	0	0	0	0	0	0	0	0
ENSG00000071205	ARHGAP10	protein_coding	A1A4S6	161	177	160	196	165	216	171	177	143
ENSG00000071242	RPS6KA2	protein_coding	Q15349	144	203	168	116	114	115	117	121	103
ENSG00000071243	ING3	protein_coding	Q9NXR8	293	407	420	416	366	407	413	386	383
ENSG00000071246	VASH1	protein_coding	Q7L8A9	37	62	37	49	44	65	51	43	35
ENSG00000071282	LMCD1	protein_coding	Q9NZU5	93	96	82	54	34	51	102	79	75
ENSG00000071462	WBSCR22	protein_coding	#N/A	1084	1554	1415	1000	779	919	1526	1416	935
ENSG00000071537	SEL1L	protein_coding	Q9UBV2	1872	2572	2103	2250	1837	1827	1737	1562	1339
ENSG00000071539	TRIP13	protein_coding	Q15645	476	704	631	953	632	808	698	693	536
ENSG00000071553	ATP6AP1	protein_coding	Q15904	2728	4266	3427	1887	1477	1849	2918	2747	2545
ENSG00000071564	TCF3	protein_coding	P15923	459	518	520	400	325	367	404	407	352
ENSG00000071575	TRIB2	protein_coding	Q92519	42	39	38	37	25	31	32	32	21
ENSG00000071626	DAZAP1	protein_coding	Q96EP5	1865	2450	2355	2780	1989	2645	2468	2276	1871
ENSG00000071655	MBD3	protein_coding	O95983	941	1138	1023	436	418	488	665	707	668
ENSG00000071677	PRLH	protein_coding	P81277	0	0	0	0	0	0	0	0	0
ENSG00000071794	HLTF	protein_coding	Q14527	1162	1449	1424	2395	1709	2004	1632	1466	1257
ENSG00000071859	FAM50A	protein_coding	Q14320	1160	1220	1134	1039	707	927	1359	1148	983
ENSG00000071889	FAM3A	protein_coding	P98173	455	554	516	265	243	280	382	385	309
ENSG00000071894	CPSF1	protein_coding	Q10570	1518	2199	1667	1043	768	979	1484	1487	1392
ENSG00000071909	MYO3B	protein_coding	Q8WXR4	0	2	0	1	0	0	0	1	1
ENSG00000071967	CYBRD1	protein_coding	Q53TN4	30	29	37	34	32	36	22	31	36
ENSG00000071991	CDH19	protein_coding	Q9H159	0	0	0	0	0	0	0	0	0
ENSG00000071994	PDCD2	protein_coding	Q16342	325	439	407	272	244	253	430	448	326
ENSG00000072041	SLC6A15	protein_coding	Q9H2J7	1097	1586	1272	1401	1082	1153	1179	1060	823
ENSG00000072042	RDH11	protein_coding	Q8TC12	650	840	781	612	475	570	684	649	515
ENSG00000072062	PRKACA	protein_coding	P17612	1266	1509	1378	1131	873	1035	1657	1487	1407
ENSG00000072071	ADGRL1	protein_coding	O94910	430	645	524	313	260	371	480	469	406
ENSG00000072080	SPP2	protein_coding	Q13103	1	0	0	1	1	2	0	1	0
ENSG00000072110	ACTN1	protein_coding	P12814	1257	1559	1318	1124	796	984	1511	1503	1199
ENSG00000072121	ZFYVE26	protein_coding	Q68DK2	372	484	399	502	435	530	309	327	249
ENSG00000072133	RPS6KA6	protein_coding	Q9UK32	35	53	44	74	63	76	53	55	29
ENSG00000072134	EPN2	protein_coding	O95208	438	535	462	356	282	341	483	465	390
ENSG00000072135	PTPN18	protein_coding	Q99952	165	182	186	123	131	124	165	208	163
ENSG00000072163	LIMS2	protein_coding	Q7Z4I7	8	8	14	6	4	2	4	6	6
ENSG00000072182	ASIC4	protein_coding	Q96FT7	9	4	6	5	8	5	4	7	2
ENSG00000072195	SPEG	protein_coding	Q15772	50	56	59	43	38	38	54	42	32
ENSG00000072201	LNX1	protein_coding	Q8TBB1	0	0	0	0	1	1	0	0	0
ENSG00000072210	ALDH3A2	protein_coding	P51648	468	638	545	677	458	553	576	527	427
ENSG00000072274	TFRC	protein_coding	P02786	2375	3102	2717	3805	2864	3188	2401	2206	1942
ENSG00000072310	SREBF1	protein_coding	P36956	429	488	430	378	308	344	357	406	290
ENSG00000072315	TRPC5	protein_coding	Q9UL62	0	2	0	2	0	0	0	0	0
ENSG00000072364	AFF4	protein_coding	Q9UHB7	861	987	915	1269	1163	1180	1075	1046	914
ENSG00000072401	UBE2D1	protein_coding	P51668	118	177	162	179	143	153	168	174	121
ENSG00000072415	MPP5	protein_coding	Q8N3R9	904	1327	1035	1884	1407	2195	1331	1614	1294
ENSG00000072422	RHOBTB1	protein_coding	O94844	65	70	60	77	70	63	63	41	46
ENSG00000072501	SMC1A	protein_coding	Q14683	7880	8641	6625	9402	7279	9287	8213	9009	6604
ENSG00000072506	HSD17B10	protein_coding	Q99714	4165	5561	5476	3111	2397	2988	6539	6414	5448
ENSG00000072518	MARK2	protein_coding	Q7KZI7	489	546	563	532	434	524	499	477	456
ENSG00000072571	HMMR	protein_coding	O75330	735	999	939	1388	949	1200	1053	957	835
ENSG00000072609	CHFR	protein_coding	Q96EP1	354	467	347	303	236	305	318	319	261
ENSG00000072657	TRHDE	protein_coding	Q9UKU6	1	5	7	4	1	2	0	3	3
ENSG00000072682	P4HA2	protein_coding	O15460	449	526	430	344	197	264	447	378	378
ENSG00000072694	FCGR2B	protein_coding	P31994	0	0	3	0	0	0	0	0	1
ENSG00000072736	NFATC3	protein_coding	Q12968	295	307	306	343	301	351	322	310	297
ENSG00000072756	TRNT1	protein_coding	Q96Q11	239	336	228	319	261	320	274	247	220
ENSG00000072778	ACADVL	protein_coding	P49748	665	807	721	726	491	650	892	823	612
ENSG00000072786	STK10	protein_coding	O94804	315	337	310	263	181	219	338	254	303
ENSG00000072803	FBXW11	protein_coding	Q9UKB1	730	988	777	1067	887	1061	938	1026	826
ENSG00000072818	ACAP1	protein_coding	Q15027	12	19	16	10	15	19	19	11	11
ENSG00000072832	CRMP1	protein_coding	Q14194	45	52	43	26	19	18	42	41	29
ENSG00000072840	EVC	protein_coding	P57679	67	75	71	68	44	70	46	42	42
ENSG00000072849	DERL2	protein_coding	Q9GZP9	632	981	820	1118	935	1078	866	841	732
ENSG00000072858	SIDT1	protein_coding	Q9NXL6	15	12	22	15	11	10	7	7	14
ENSG00000072864	NDE1	protein_coding	Q9NXR1	0	0	1	0	1	0	0	0	0
ENSG00000072952	MRVI1	protein_coding	Q9Y6F6	0	0	0	1	2	3	1	0	0
ENSG00000072954	TMEM38A	protein_coding	Q9H6F2	22	28	34	29	15	18	31	36	25
ENSG00000072958	AP1M1	protein_coding	Q9BXS5	594	925	818	804	568	648	1006	901	798
ENSG00000073008	PVR	protein_coding	P15151	432	600	502	432	337	412	474	447	362
ENSG00000073050	XRCC1	protein_coding	P18887	222	264	243	278	210	251	302	268	193
ENSG00000073060	SCARB1	protein_coding	Q8WTV0	778	1074	885	731	568	639	728	737	637
ENSG00000073067	CYP2W1	protein_coding	Q8TAV3	2	1	0	2	0	4	2	5	0
ENSG00000073111	MCM2	protein_coding	P49736	6514	9014	8240	7810	5710	9259	9180	10778	8363
ENSG00000073146	MOV10L1	protein_coding	Q9BXT6	0	0	1	1	1	2	1	2	2
ENSG00000073150	PANX2	protein_coding	Q96RD6	30	15	25	14	13	15	26	21	16
ENSG00000073169	SELENOO	protein_coding	Q9BVL4	221	267	238	157	123	160	199	179	156
ENSG00000073282	TP63	protein_coding	Q9H3D4	1	0	0	0	0	0	0	0	0
ENSG00000073331	ALPK1	protein_coding	Q96QP1	43	71	34	72	55	58	43	37	46
ENSG00000073350	LLGL2	protein_coding	Q6P1M3	78	88	84	77	54	58	101	86	73
ENSG00000073417	PDE8A	protein_coding	O60658	208	217	189	248	192	264	182	163	117
ENSG00000073464	CLCN4	protein_coding	P51793	0	4	2	1	0	5	1	0	1
ENSG00000073536	NLE1	protein_coding	Q9NVX2	707	995	789	579	481	585	747	846	723
ENSG00000073578	SDHA	protein_coding	P31040	1178	1458	1042	1383	961	1098	1284	1196	1007
ENSG00000073584	SMARCE1	protein_coding	Q969G3	75	123	130	130	140	130	99	109	121
ENSG00000073598	FNDC8	protein_coding	Q8TC99	3	0	3	0	0	0	4	3	2
ENSG00000073605	GSDMB	protein_coding	Q8TAX9	18	23	18	30	28	35	24	22	21
ENSG00000073614	KDM5A	protein_coding	P29375	3380	3819	2689	3556	2494	3224	3733	3924	2873
ENSG00000073670	ADAM11	protein_coding	O75078	51	88	53	50	36	47	67	52	41
ENSG00000073711	PPP2R3A	protein_coding	Q06190	38	48	38	81	73	77	46	54	38
ENSG00000073712	FERMT2	protein_coding	Q96AC1	881	1115	1040	1432	1088	1272	1211	1095	909
ENSG00000073734	ABCB11	protein_coding	O95342	0	0	0	0	0	0	0	0	0
ENSG00000073737	DHRS9	protein_coding	Q9BPW9	3	1	0	4	2	1	1	2	2
ENSG00000073754	CD5L	protein_coding	O43866	0	0	0	0	0	0	0	0	0
ENSG00000073756	PTGS2	protein_coding	P35354	38	82	68	50	53	66	62	62	45
ENSG00000073792	IGF2BP2	protein_coding	Q9Y6M1	268	301	275	337	258	335	302	293	280
ENSG00000073803	MAP3K13	protein_coding	O43283	262	462	320	742	553	683	403	424	343
ENSG00000073849	ST6GAL1	protein_coding	P15907	31	63	44	35	32	45	51	56	43
ENSG00000073861	TBX21	protein_coding	Q9UL17	4	6	2	2	1	2	5	2	2
ENSG00000073905	VDAC1P1	processed_pseudogene	#N/A	71	113	91	173	114	153	146	97	122
ENSG00000073910	FRY	protein_coding	Q5TBA9	19	26	24	36	28	47	32	20	36
ENSG00000073921	PICALM	protein_coding	Q13492	701	1001	922	982	779	870	1080	1015	960
ENSG00000073969	NSF	protein_coding	P46459	0	1	0	0	0	0	2	0	1
ENSG00000074047	GLI2	protein_coding	P10070	61	67	56	34	44	42	36	43	30
ENSG00000074054	CLASP1	protein_coding	Q7Z460	1231	1560	1381	1463	1101	1340	1320	1377	1179
ENSG00000074071	MRPS34	protein_coding	P82930	1349	1742	1520	1034	828	903	1572	1552	1207
ENSG00000074181	NOTCH3	protein_coding	Q9UM47	270	295	245	178	168	199	238	279	194
ENSG00000074201	CLNS1A	protein_coding	P54105	1869	2223	2133	2143	1648	1869	2546	2308	1882
ENSG00000074211	PPP2R2C	protein_coding	Q9Y2T4	13	25	6	7	19	19	18	8	16
ENSG00000074219	TEAD2	protein_coding	Q15562	124	140	124	161	90	128	157	133	114
ENSG00000074266	EED	protein_coding	O75530	713	873	746	903	627	742	893	892	764
ENSG00000074276	CDHR2	protein_coding	Q9BYE9	12	15	10	6	6	9	4	10	12
ENSG00000074317	SNCB	protein_coding	Q16143	29	30	26	42	27	28	44	37	34
ENSG00000074319	TSG101	protein_coding	Q99816	998	1334	1151	1098	981	1111	1257	1175	1075
ENSG00000074356	NCBP3	protein_coding	Q53F19	1749	1921	1401	1486	1356	1620	1584	1670	1299
ENSG00000074370	ATP2A3	protein_coding	Q93084	116	144	110	85	58	67	148	150	97
ENSG00000074410	CA12	protein_coding	O43570	10	13	5	17	6	17	9	13	10
ENSG00000074416	MGLL	protein_coding	Q99685	14	15	10	12	7	9	10	12	12
ENSG00000074527	NTN4	protein_coding	Q9HB63	15	13	21	10	9	10	17	8	10
ENSG00000074582	BCS1L	protein_coding	Q9Y276	472	644	609	653	499	587	618	521	482
ENSG00000074590	NUAK1	protein_coding	O60285	81	71	64	107	83	108	64	62	50
ENSG00000074603	DPP8	protein_coding	Q6V1X1	308	436	338	401	332	353	328	257	294
ENSG00000074621	SLC24A1	protein_coding	O60721	89	96	106	112	129	117	86	87	72
ENSG00000074657	ZNF532	protein_coding	Q9HCE3	42	97	62	59	39	57	43	43	59
ENSG00000074660	SCARF1	protein_coding	Q14162	0	0	0	0	0	0	0	0	0
ENSG00000074695	LMAN1	protein_coding	P49257	3186	4218	3760	3956	2856	3611	3461	3188	2832
ENSG00000074696	HACD3	protein_coding	Q9P035	8331	12510	8878	7457	5448	6966	8397	8870	7018
ENSG00000074706	IPCEF1	protein_coding	Q8WWN9	4	5	11	12	2	7	2	4	7
ENSG00000074755	ZZEF1	protein_coding	O43149	933	1373	1164	1373	1165	1351	991	868	763
ENSG00000074771	NOX3	protein_coding	Q9HBY0	0	0	0	0	0	0	0	1	0
ENSG00000074800	ENO1	protein_coding	P06733	56021	73883	65092	43322	32775	42452	81077	93634	76391
ENSG00000074803	SLC12A1	protein_coding	Q13621	1	0	0	0	0	0	1	0	0
ENSG00000074842	MYDGF	protein_coding	Q969H8	1183	1478	1452	977	807	824	1381	1093	990
ENSG00000074855	ANO8	protein_coding	Q9HCE9	219	240	185	143	108	136	214	185	216
ENSG00000074935	TUBE1	protein_coding	Q9UJT0	341	445	438	461	319	343	474	401	332
ENSG00000074964	ARHGEF10L	protein_coding	Q9HCE6	70	58	49	45	40	45	48	32	35
ENSG00000074966	TXK	protein_coding	P42681	0	0	3	3	3	0	0	0	1
ENSG00000075035	WSCD2	protein_coding	Q2TBF2	0	1	0	0	0	0	0	0	0
ENSG00000075043	KCNQ2	protein_coding	O43526	20	22	21	18	9	17	14	9	12
ENSG00000075073	TACR2	protein_coding	P21452	1	0	1	0	1	0	0	0	0
ENSG00000075089	ACTR6	protein_coding	Q9GZN1	337	483	498	590	439	473	429	438	368
ENSG00000075131	TIPIN	protein_coding	Q9BVW5	1054	1455	1337	2153	1508	1833	1570	1546	1225
ENSG00000075142	SRI	protein_coding	P30626	893	1206	1230	854	627	801	1229	1108	1007
ENSG00000075151	EIF4G3	protein_coding	O43432	1542	1778	1583	2015	1557	1917	1763	1513	1232
ENSG00000075188	NUP37	protein_coding	Q8NFH4	752	1078	1011	1620	1149	1469	1127	1050	1025
ENSG00000075213	SEMA3A	protein_coding	Q14563	73	107	79	62	43	51	61	63	58
ENSG00000075218	GTSE1	protein_coding	Q9NYZ3	950	1106	899	831	630	791	951	1011	790
ENSG00000075223	SEMA3C	protein_coding	Q99985	551	743	612	667	415	475	593	562	499
ENSG00000075234	TTC38	protein_coding	Q5R3I4	151	172	154	193	127	160	179	185	160
ENSG00000075239	ACAT1	protein_coding	P24752	1016	1355	1377	2403	1567	1991	1858	1641	1362
ENSG00000075240	GRAMD4	protein_coding	Q6IC98	98	134	94	109	75	117	113	92	91
ENSG00000075275	CELSR1	protein_coding	Q9NYQ6	239	224	203	211	184	196	212	203	140
ENSG00000075290	WNT8B	protein_coding	Q93098	1	4	6	4	2	4	0	5	1
ENSG00000075292	ZNF638	protein_coding	Q14966	1019	1214	1105	2104	1438	1737	1218	1169	865
ENSG00000075303	SLC25A40	protein_coding	Q8TBP6	142	196	134	209	178	173	128	130	121
ENSG00000075336	TIMM21	protein_coding	Q9BVV7	254	329	344	275	232	212	297	265	242
ENSG00000075340	ADD2	protein_coding	P35612	431	568	471	662	561	598	560	573	430
ENSG00000075388	FGF4	protein_coding	P08620	0	0	0	0	0	0	1	0	1
ENSG00000075391	RASAL2	protein_coding	Q9UJF2	233	294	257	307	203	250	226	218	170
ENSG00000075399	VPS9D1	protein_coding	Q9Y2B5	21	36	27	35	35	34	33	25	24
ENSG00000075407	ZNF37A	protein_coding	P17032	39	70	74	106	77	112	56	54	42
ENSG00000075413	MARK3	protein_coding	P27448	508	586	555	854	687	792	552	532	436
ENSG00000075415	SLC25A3	protein_coding	Q00325	1671	2312	2273	2343	1801	2279	2572	2412	2127
ENSG00000075420	FNDC3B	protein_coding	Q53EP0	381	497	469	458	361	391	561	425	406
ENSG00000075426	FOSL2	protein_coding	P15408	82	97	95	87	77	88	89	71	56
ENSG00000075429	CACNG5	protein_coding	Q9UF02	2	0	0	2	0	3	0	0	0
ENSG00000075461	CACNG4	protein_coding	Q9UBN1	0	3	1	1	1	1	0	0	2
ENSG00000075539	FRYL	protein_coding	O94915	221	264	232	462	318	387	291	228	198
ENSG00000075568	TMEM131	protein_coding	Q92545	322	468	365	533	411	486	306	287	274
ENSG00000075618	FSCN1	protein_coding	Q16658	205	258	227	259	175	196	328	313	253
ENSG00000075624	ACTB	protein_coding	P60709	18268	24851	21212	11185	8247	10029	25807	27241	23652
ENSG00000075643	MOCOS	protein_coding	Q96EN8	76	119	110	147	135	134	98	76	70
ENSG00000075651	PLD1	protein_coding	Q13393	156	124	128	169	109	166	159	167	151
ENSG00000075673	ATP12A	protein_coding	P54707	4	5	2	3	2	1	6	3	1
ENSG00000075702	WDR62	protein_coding	O43379	687	891	800	789	577	838	644	581	609
ENSG00000075711	DLG1	protein_coding	Q12959	324	382	337	437	393	416	388	345	262
ENSG00000075785	RAB7A	protein_coding	P51149	1647	2239	2186	2803	2223	2321	2942	2622	2111
ENSG00000075790	BCAP29	protein_coding	Q9UHQ4	365	617	567	842	554	675	587	453	412
ENSG00000075826	SEC31B	protein_coding	Q9NQW1	87	94	52	95	71	109	49	38	45
ENSG00000075856	SART3	protein_coding	Q15020	1121	1355	1142	1299	1013	1121	1160	1119	935
ENSG00000075884	ARHGAP15	protein_coding	Q53QZ3	0	0	0	0	0	0	0	1	0
ENSG00000075886	TUBA3D	protein_coding	P0DPH8	5	0	1	1	1	3	1	0	2
ENSG00000075891	PAX2	protein_coding	Q02962	16	24	18	23	13	25	21	22	15
ENSG00000075914	EXOSC7	protein_coding	Q15024	729	907	864	575	432	558	967	943	733
ENSG00000075945	KIFAP3	protein_coding	Q92845	564	810	742	1051	762	946	916	750	699
ENSG00000075975	MKRN2	protein_coding	Q9H000	572	787	735	879	604	681	793	716	727
ENSG00000076003	MCM6	protein_coding	Q14566	2460	3150	2900	3891	2767	3145	3433	3067	2515
ENSG00000076043	REXO2	protein_coding	Q9Y3B8	342	413	435	372	255	316	458	469	376
ENSG00000076053	RBM7	protein_coding	Q9Y580	53	66	46	72	65	71	84	66	45
ENSG00000076067	RBMS2	protein_coding	Q15434	55	60	57	97	81	77	71	62	63
ENSG00000076108	BAZ2A	protein_coding	Q9UIF9	1306	1737	1509	1630	1278	1609	1351	1316	1130
ENSG00000076201	PTPN23	protein_coding	Q9H3S7	335	464	395	460	360	404	396	382	329
ENSG00000076242	MLH1	protein_coding	P40692	0	0	0	0	0	2	0	1	1
ENSG00000076248	UNG	protein_coding	P13051	734	1004	852	929	785	841	1152	1151	884
ENSG00000076258	FMO4	protein_coding	P31512	7	20	22	30	19	19	25	21	14
ENSG00000076321	KLHL20	protein_coding	Q9Y2M5	137	176	166	180	147	152	159	167	114
ENSG00000076344	RGS11	protein_coding	O94810	0	0	0	3	2	2	1	0	0
ENSG00000076351	SLC46A1	protein_coding	Q96NT5	48	48	45	65	37	47	35	29	37
ENSG00000076356	PLXNA2	protein_coding	O75051	176	248	171	156	131	154	153	182	134
ENSG00000076382	SPAG5	protein_coding	Q96R06	544	710	627	869	671	756	677	603	497
ENSG00000076513	ANKRD13A	protein_coding	Q8IZ07	299	348	339	433	321	451	341	343	318
ENSG00000076554	TPD52	protein_coding	P55327	73	118	109	94	85	69	119	99	74
ENSG00000076555	ACACB	protein_coding	O00763	165	194	161	179	149	187	116	137	122
ENSG00000076604	TRAF4	protein_coding	Q9BUZ4	196	291	224	148	126	153	232	219	199
ENSG00000076641	PAG1	protein_coding	Q9NWQ8	102	126	126	152	125	143	116	88	87
ENSG00000076650	GPATCH1	protein_coding	Q9BRR8	196	201	189	234	180	232	222	246	174
ENSG00000076662	ICAM3	protein_coding	P32942	0	0	0	2	0	0	0	0	0
ENSG00000076685	NT5C2	protein_coding	P49902	304	361	355	562	444	542	356	338	334
ENSG00000076706	MCAM	protein_coding	P43121	227	309	270	182	171	213	211	208	157
ENSG00000076716	GPC4	protein_coding	O75487	1451	2032	1357	885	667	789	1069	1287	1028
ENSG00000076770	MBNL3	protein_coding	Q9NUK0	60	92	74	109	102	106	66	71	46
ENSG00000076826	CAMSAP3	protein_coding	Q9P1Y5	118	150	144	139	78	137	136	155	104
ENSG00000076864	RAP1GAP	protein_coding	P47736	40	34	34	41	32	37	34	30	34
ENSG00000076924	XAB2	protein_coding	Q9HCS7	503	646	583	401	266	360	583	536	443
ENSG00000076928	ARHGEF1	protein_coding	Q92888	234	328	287	243	168	186	279	221	189
ENSG00000076944	STXBP2	protein_coding	Q15833	127	109	126	122	90	110	103	101	90
ENSG00000076984	MAP2K7	protein_coding	O14733	408	562	520	509	413	565	448	390	393
ENSG00000077009	NMRK2	protein_coding	Q9NPI5	9	10	7	16	9	13	10	10	10
ENSG00000077044	DGKD	protein_coding	Q16760	268	367	308	304	226	314	242	278	240
ENSG00000077063	CTTNBP2	protein_coding	Q8WZ74	198	205	134	151	104	144	176	177	137
ENSG00000077080	ACTL6B	protein_coding	O94805	13	8	11	5	6	8	12	6	9
ENSG00000077092	RARB	protein_coding	P10826	90	121	130	156	103	92	150	108	77
ENSG00000077097	TOP2B	protein_coding	Q02880	2432	3631	3259	4447	3414	4347	3796	3757	3539
ENSG00000077147	TM9SF3	protein_coding	Q9HD45	3010	4541	3580	3307	2372	3135	2839	2624	2382
ENSG00000077150	NFKB2	protein_coding	Q00653	197	259	274	221	183	194	243	216	209
ENSG00000077152	UBE2T	protein_coding	Q9NPD8	1515	1996	1873	2114	1548	1748	2188	1963	1715
ENSG00000077157	PPP1R12B	protein_coding	O60237	105	124	114	130	111	119	127	106	79
ENSG00000077232	DNAJC10	protein_coding	Q8IXB1	1163	1585	1308	1895	1407	1585	1151	1183	903
ENSG00000077235	GTF3C1	protein_coding	Q12789	2436	2873	2546	2677	2010	2550	2652	2477	2211
ENSG00000077238	IL4R	protein_coding	P24394	41	64	41	34	43	36	55	62	50
ENSG00000077254	USP33	protein_coding	Q8TEY7	1205	1558	1296	2053	1553	1768	1431	1323	1095
ENSG00000077264	PAK3	protein_coding	O75914	17	27	21	26	12	8	16	19	24
ENSG00000077274	CAPN6	protein_coding	Q9Y6Q1	0	1	1	2	0	2	1	5	1
ENSG00000077279	DCX	protein_coding	O43602	0	1	0	0	1	0	1	0	1
ENSG00000077312	SNRPA	protein_coding	P09012	1991	2774	2369	1682	1182	1533	2874	2463	2242
ENSG00000077327	SPAG6	protein_coding	O75602	3	4	3	6	3	6	2	2	3
ENSG00000077348	EXOSC5	protein_coding	Q9NQT4	430	496	509	341	241	269	555	482	448
ENSG00000077380	DYNC1I2	protein_coding	Q13409	218	328	316	473	329	437	331	288	273
ENSG00000077420	APBB1IP	protein_coding	Q7Z5R6	1	1	0	1	0	0	1	0	0
ENSG00000077454	LRCH4	protein_coding	O75427	121	117	96	89	71	88	112	105	89
ENSG00000077458	FAM76B	protein_coding	Q5HYJ3	204	265	216	338	235	344	274	267	227
ENSG00000077463	SIRT6	protein_coding	Q8N6T7	262	299	308	223	186	188	291	264	256
ENSG00000077498	TYR	protein_coding	P14679	0	0	0	0	0	0	0	0	0
ENSG00000077514	POLD3	protein_coding	Q15054	454	662	508	959	722	965	621	658	527
ENSG00000077522	ACTN2	protein_coding	P35609	97	129	112	101	77	100	106	78	58
ENSG00000077549	CAPZB	protein_coding	P47756	2710	3227	2917	2923	2188	2513	3532	3252	2856
ENSG00000077585	GPR137B	protein_coding	O60478	19	21	29	21	16	23	20	20	16
ENSG00000077616	NAALAD2	protein_coding	Q9Y3Q0	12	15	13	19	14	24	17	10	4
ENSG00000077684	JADE1	protein_coding	Q6IE81	335	466	397	405	348	342	394	358	317
ENSG00000077713	SLC25A43	protein_coding	Q8WUT9	14	29	8	9	19	20	15	17	10
ENSG00000077721	UBE2A	protein_coding	P49459	1388	2212	1866	2197	1590	1905	2328	2230	2087
ENSG00000077782	FGFR1	protein_coding	P11362	509	628	523	395	304	386	494	471	420
ENSG00000077800	FKBP6	protein_coding	O75344	1	2	0	0	0	1	0	0	0
ENSG00000077935	SMC1B	protein_coding	Q8NDV3	3	3	5	6	6	7	4	7	5
ENSG00000077942	FBLN1	protein_coding	P23142	851	1149	923	371	264	319	822	763	642
ENSG00000077943	ITGA8	protein_coding	P53708	112	158	113	102	95	120	114	114	104
ENSG00000077984	CST7	protein_coding	O76096	1	3	2	0	2	5	3	1	0
ENSG00000078018	MAP2	protein_coding	P11137	11	6	3	9	6	15	13	10	4
ENSG00000078043	PIAS2	protein_coding	O75928	155	236	209	279	217	239	246	213	151
ENSG00000078053	AMPH	protein_coding	P49418	76	82	70	101	55	74	92	84	51
ENSG00000078061	ARAF	protein_coding	P10398	335	428	434	321	291	316	323	284	241
ENSG00000078070	MCCC1	protein_coding	Q96RQ3	152	159	136	292	204	243	178	169	137
ENSG00000078081	LAMP3	protein_coding	Q9UQV4	49	48	36	48	28	28	46	32	19
ENSG00000078098	FAP	protein_coding	Q12884	0	0	0	0	0	0	0	0	0
ENSG00000078114	NEBL	protein_coding	O76041	65	83	50	70	92	75	69	80	49
ENSG00000078124	ACER3	protein_coding	Q9NUN7	82	158	130	170	97	148	119	133	97
ENSG00000078140	UBE2K	protein_coding	P61086	974	1333	1152	1008	839	871	1123	1066	767
ENSG00000078142	PIK3C3	protein_coding	Q8NEB9	487	733	576	820	628	800	735	880	630
ENSG00000078177	N4BP2	protein_coding	Q86UW6	348	426	362	724	535	600	306	308	228
ENSG00000078237	TIGAR	protein_coding	Q9NQ88	499	559	550	790	575	640	737	641	522
ENSG00000078246	TULP3	protein_coding	O75386	765	1047	949	1300	895	1097	1384	1314	1106
ENSG00000078269	SYNJ2	protein_coding	O15056	160	183	223	213	143	176	149	147	146
ENSG00000078295	ADCY2	protein_coding	Q08462	0	0	0	0	0	0	0	0	0
ENSG00000078304	PPP2R5C	protein_coding	Q13362	614	755	691	819	610	688	820	772	707
ENSG00000078319	PMS2P1	unprocessed_pseudogene	A4D2B8	20	21	26	48	33	31	25	25	15
ENSG00000078328	RBFOX1	protein_coding	Q9NWB1	0	1	0	1	0	0	0	0	0
ENSG00000078369	GNB1	protein_coding	P62873	2260	3084	2696	2971	2553	2848	3163	2936	2528
ENSG00000078399	HOXA9	protein_coding	P31269	325	399	377	333	269	323	412	341	321
ENSG00000078401	EDN1	protein_coding	P05305	6	2	1	3	1	6	2	2	0
ENSG00000078403	MLLT10	protein_coding	P55197	202	264	223	429	315	366	217	193	156
ENSG00000078487	ZCWPW1	protein_coding	Q9H0M4	43	41	24	38	22	37	32	32	23
ENSG00000078549	ADCYAP1R1	protein_coding	P41586	18	43	38	31	16	19	23	20	19
ENSG00000078579	FGF20	protein_coding	Q9NP95	4	1	1	2	0	0	0	1	1
ENSG00000078589	P2RY10	protein_coding	O00398	0	0	0	0	0	0	0	0	0
ENSG00000078596	ITM2A	protein_coding	O43736	15	2	9	2	2	7	6	10	1
ENSG00000078618	NRDC	protein_coding	O43847	1181	1440	1336	2440	1756	1920	1522	1307	1076
ENSG00000078668	VDAC3	protein_coding	Q9Y277	1047	1371	1285	2573	1720	2118	1645	1549	1309
ENSG00000078674	PCM1	protein_coding	Q15154	1555	1856	1480	2564	1961	2183	1738	1702	1321
ENSG00000078687	TNRC6C	protein_coding	Q9HCJ0	185	213	188	262	204	209	195	171	132
ENSG00000078699	CBFA2T2	protein_coding	O43439	222	283	248	300	241	280	278	269	209
ENSG00000078725	BRINP1	protein_coding	O60477	0	0	0	0	0	0	0	0	0
ENSG00000078747	ITCH.1	protein_coding	#N/A	77	78	78	189	138	150	74	74	61
ENSG00000078795	PKD2L2	protein_coding	Q9NZM6	6	9	7	3	6	9	5	4	1
ENSG00000078804	TP53INP2	protein_coding	Q8IXH6	40	65	61	82	78	116	49	50	49
ENSG00000078808	SDF4	protein_coding	Q9BRK5	1609	1820	1530	858	611	693	1424	1193	1048
ENSG00000078814	MYH7B	protein_coding	A7E2Y1	12	8	20	8	16	12	10	9	8
ENSG00000078898	BPIFB2	protein_coding	Q8N4F0	0	1	0	0	0	0	0	0	0
ENSG00000078900	TP73	protein_coding	O15350	83	86	75	60	54	63	63	73	63
ENSG00000078902	TOLLIP	protein_coding	Q9H0E2	610	792	720	337	307	352	777	929	615
ENSG00000078967	UBE2D4	protein_coding	Q9Y2X8	25	48	40	52	29	33	29	27	30
ENSG00000079101	CLUL1	protein_coding	Q15846	14	12	10	7	14	8	15	7	14
ENSG00000079102	RUNX1T1	protein_coding	Q06455	111	126	97	130	118	114	112	96	89
ENSG00000079112	CDH17	protein_coding	Q12864	0	2	0	0	1	0	0	0	0
ENSG00000079134	THOC1	protein_coding	Q96FV9	403	518	388	519	411	445	419	366	300
ENSG00000079150	FKBP7	protein_coding	Q9Y680	475	709	558	598	481	616	550	562	478
ENSG00000079156	OSBPL6	protein_coding	Q9BZF3	140	175	196	295	188	266	163	136	109
ENSG00000079215	SLC1A3	protein_coding	P43003	199	285	200	300	197	215	180	184	115
ENSG00000079246	XRCC5	protein_coding	P13010	16155	31341	23448	18685	14353	19005	25316	28741	23995
ENSG00000079257	LXN	protein_coding	Q9BS40	15	30	21	37	24	20	25	25	16
ENSG00000079263	SP140	protein_coding	Q13342	0	0	0	0	0	0	0	0	1
ENSG00000079277	MKNK1	protein_coding	Q9BUB5	196	204	201	227	180	187	232	197	181
ENSG00000079308	TNS1	protein_coding	Q9HBL0	3	11	7	7	4	10	3	11	6
ENSG00000079313	REXO1	protein_coding	Q8N1G1	267	348	290	232	155	179	251	216	200
ENSG00000079332	SAR1A	protein_coding	Q9NR31	1797	2611	2326	2067	1583	1927	2622	2570	2084
ENSG00000079335	CDC14A	protein_coding	Q9UNH5	46	72	59	97	70	96	73	66	52
ENSG00000079337	RAPGEF3	protein_coding	O95398	20	29	23	27	24	9	21	14	11
ENSG00000079385	CEACAM1	protein_coding	P13688	2	2	2	9	2	3	0	4	3
ENSG00000079387	SENP1	protein_coding	Q9P0U3	408	538	467	500	488	583	504	428	391
ENSG00000079393	DUSP13	protein_coding	Q9UII6	1	3	3	0	0	1	0	0	1
ENSG00000079432	CIC	protein_coding	Q96RK0	246	244	242	266	215	266	225	199	210
ENSG00000079435	LIPE	protein_coding	Q05469	63	80	61	78	67	82	56	48	55
ENSG00000079459	FDFT1	protein_coding	P37268	1970	2746	2133	1801	1228	1481	2227	2353	2036
ENSG00000079462	PAFAH1B3	protein_coding	Q15102	208	232	240	172	123	109	206	227	186
ENSG00000079482	OPHN1	protein_coding	O60890	120	116	106	159	106	123	101	97	68
ENSG00000079557	AFM	protein_coding	P43652	0	0	0	0	1	0	0	0	0
ENSG00000079616	KIF22	protein_coding	Q14807	954	1287	1174	1118	820	990	1234	1189	1055
ENSG00000079689	SCGN	protein_coding	O76038	0	0	0	1	0	0	2	2	0
ENSG00000079691	CARMIL1	protein_coding	Q5VZK9	94	145	97	188	104	163	116	124	97
ENSG00000079739	PGM1	protein_coding	P36871	1470	2046	1759	1599	1187	1517	1932	2001	1675
ENSG00000079785	DDX1	protein_coding	Q92499	2465	3234	3240	6319	4151	5393	3659	3686	3011
ENSG00000079805	DNM2	protein_coding	P50570	1755	2042	1769	1556	1229	1466	1876	1832	1517
ENSG00000079819	EPB41L2	protein_coding	O43491	1644	2033	1749	2218	1703	1885	2304	2136	1828
ENSG00000079841	RIMS1	protein_coding	Q86UR5	2	7	4	13	7	8	10	2	5
ENSG00000079931	MOXD1	protein_coding	Q6UVY6	149	181	179	159	119	104	130	149	121
ENSG00000079950	STX7	protein_coding	O15400	197	210	213	389	335	356	190	189	203
ENSG00000079974	RABL2B	protein_coding	Q9UNT1	71	86	84	54	42	50	73	52	49
ENSG00000079999	KEAP1	protein_coding	Q14145	416	558	436	473	364	454	436	467	362
ENSG00000080007	DDX43	protein_coding	Q9NXZ2	0	0	0	0	0	1	0	0	0
ENSG00000080031	PTPRH	protein_coding	Q9HD43	6	13	12	11	7	4	10	3	5
ENSG00000080166	DCT	protein_coding	P40126	1	6	9	5	6	1	5	4	6
ENSG00000080189	SLC35C2	protein_coding	Q9NQQ7	439	610	491	290	250	342	352	362	342
ENSG00000080200	CRYBG3	protein_coding	Q68DQ2	182	274	243	465	312	368	257	265	201
ENSG00000080224	EPHA6	protein_coding	Q9UF33	71	81	77	95	52	63	53	52	57
ENSG00000080293	SCTR	protein_coding	P47872	0	0	1	0	1	0	0	1	0
ENSG00000080298	RFX3	protein_coding	P48380	84	161	100	130	88	147	174	145	132
ENSG00000080345	RIF1	protein_coding	Q5UIP0	2046	2836	2367	3219	2469	2928	2074	2065	1724
ENSG00000080371	RAB21	protein_coding	Q9UL25	475	602	499	767	569	657	581	519	476
ENSG00000080493	SLC4A4	protein_coding	Q9Y6R1	27	35	44	46	37	39	29	39	21
ENSG00000080503	SMARCA2	protein_coding	P51531	416	498	509	681	448	596	539	541	434
ENSG00000080511	RDH8	protein_coding	Q9NYR8	0	0	1	0	0	1	0	0	0
ENSG00000080546	SESN1	protein_coding	Q9Y6P5	141	181	140	239	198	210	165	171	150
ENSG00000080561	MID2	protein_coding	Q9UJV3	152	235	220	273	181	216	163	191	125
ENSG00000080572	PIH1D3	protein_coding	Q9NQM4	1	2	0	3	0	1	0	2	1
ENSG00000080573	COL5A3	protein_coding	P25940	0	1	1	1	0	0	1	2	0
ENSG00000080603	SRCAP	protein_coding	Q6ZRS2	154	181	164	218	165	155	194	174	163
ENSG00000080608	PUM3	protein_coding	Q15397	503	733	655	946	729	898	747	658	561
ENSG00000080618	CPB2	protein_coding	Q96IY4	0	1	0	0	2	2	0	3	0
ENSG00000080644	CHRNA3	protein_coding	P32297	78	98	63	50	29	40	83	90	51
ENSG00000080709	KCNN2	protein_coding	Q9H2S1	2	9	4	5	2	7	4	4	3
ENSG00000080802	CNOT4	protein_coding	O95628	431	624	591	635	503	526	705	618	536
ENSG00000080815	PSEN1	protein_coding	P49768	400	594	518	524	391	453	487	432	366
ENSG00000080819	CPOX	protein_coding	P36551	758	1036	910	759	604	756	917	936	782
ENSG00000080822	CLDND1	protein_coding	Q9NY35	157	304	220	303	216	254	242	213	178
ENSG00000080823	MOK	protein_coding	Q9UQ07	149	189	181	183	163	196	154	139	118
ENSG00000080824	HSP90AA1	protein_coding	P07900	74411	91566	59083	56630	42765	58839	112468	131555	101310
ENSG00000080839	RBL1	protein_coding	P28749	701	851	754	1272	912	1233	906	836	776
ENSG00000080845	DLGAP4	protein_coding	Q9Y2H0	131	167	181	233	183	202	190	172	150
ENSG00000080854	IGSF9B	protein_coding	Q9UPX0	68	73	79	81	56	62	66	63	56
ENSG00000080910	CFHR2	protein_coding	P36980	0	0	0	0	0	0	0	0	0
ENSG00000080947	CROCCP3	transcribed_unprocessed_pseudogene	Q8IVE0	48	43	40	38	26	29	16	18	29
ENSG00000080986	NDC80	protein_coding	O14777	508	693	615	895	612	756	643	533	486
ENSG00000081014	AP4E1	protein_coding	Q9UPM8	85	109	119	212	170	200	108	90	73
ENSG00000081019	RSBN1	protein_coding	Q5VWQ0	499	617	509	535	412	481	561	512	458
ENSG00000081026	MAGI3	protein_coding	Q5TCQ9	385	536	398	401	299	361	394	483	369
ENSG00000081041	CXCL2	protein_coding	P19875	4	0	2	1	3	2	0	2	0
ENSG00000081051	AFP	protein_coding	P02771	0	0	0	0	0	0	0	0	1
ENSG00000081052	COL4A4	protein_coding	P53420	18	20	23	20	18	22	15	19	13
ENSG00000081059	TCF7	protein_coding	P36402	44	55	52	46	44	58	44	28	32
ENSG00000081087	OSTM1	protein_coding	Q86WC4	168	211	201	141	124	149	180	177	135
ENSG00000081138	CDH7	protein_coding	Q9ULB5	1	0	0	1	1	3	0	0	0
ENSG00000081148	IMPG2	protein_coding	Q9BZV3	2	4	1	1	3	4	1	2	0
ENSG00000081154	PCNP	protein_coding	Q8WW12	405	462	493	635	471	429	575	419	329
ENSG00000081177	EXD2	protein_coding	Q9NVH0	169	205	178	276	173	216	160	146	114
ENSG00000081181	ARG2	protein_coding	P78540	248	414	323	373	229	264	453	341	382
ENSG00000081189	MEF2C	protein_coding	Q06413	142	209	167	233	169	189	186	181	166
ENSG00000081237	PTPRC	protein_coding	P08575	0	1	0	0	0	0	0	0	0
ENSG00000081248	CACNA1S	protein_coding	Q13698	2	1	0	1	0	3	0	0	1
ENSG00000081277	PKP1	protein_coding	Q13835	0	0	0	0	0	0	0	0	0
ENSG00000081307	UBA5	protein_coding	Q9GZZ9	678	962	830	1255	866	1025	915	845	722
ENSG00000081320	STK17B	protein_coding	O94768	173	252	214	290	239	254	224	200	158
ENSG00000081377	CDC14B	protein_coding	O60729	89	122	136	129	118	136	105	92	78
ENSG00000081386	ZNF510	protein_coding	Q9Y2H8	16	31	29	47	40	44	27	18	13
ENSG00000081479	LRP2	protein_coding	P98164	550	652	503	518	368	472	445	421	312
ENSG00000081665	ZNF506	protein_coding	Q5JVG8	3	13	10	15	21	26	6	7	11
ENSG00000081692	JMJD4	protein_coding	Q9H9V9	179	222	229	157	137	141	171	177	156
ENSG00000081721	DUSP12	protein_coding	Q9UNI6	153	172	159	235	151	208	146	151	123
ENSG00000081760	AACS	protein_coding	Q86V21	470	645	575	534	369	453	523	491	419
ENSG00000081791	KIAA0141	protein_coding	#N/A	234	381	290	251	196	201	276	282	266
ENSG00000081800	SLC13A1	protein_coding	Q9BZW2	0	0	0	0	0	0	0	0	0
ENSG00000081803	CADPS2	protein_coding	Q86UW7	137	183	156	248	178	215	153	171	123
ENSG00000081818	PCDHB4	protein_coding	Q9Y5E5	1	0	0	1	0	0	0	0	0
ENSG00000081842	PCDHA6	protein_coding	Q9UN73	0	0	0	0	0	1	0	0	0
ENSG00000081853	PCDHGA2	protein_coding	Q9Y5H1	0	2	0	2	0	2	0	1	1
ENSG00000081870	HSPB11	protein_coding	Q9Y547	415	546	526	944	693	821	734	673	529
ENSG00000081913	PHLPP1	protein_coding	O60346	147	186	163	197	149	164	170	166	160
ENSG00000081923	ATP8B1	protein_coding	O43520	6	7	7	7	12	8	10	5	8
ENSG00000081985	IL12RB2	protein_coding	Q99665	18	15	24	17	11	25	13	20	12
ENSG00000082014	SMARCD3	protein_coding	Q6STE5	174	222	197	169	95	177	222	167	166
ENSG00000082068	WDR70	protein_coding	Q9NW82	538	691	549	748	503	612	664	580	549
ENSG00000082074	FYB	protein_coding	#N/A	0	0	0	0	0	0	0	0	0
ENSG00000082126	MPP4	protein_coding	Q96JB8	2	2	1	4	2	11	0	2	0
ENSG00000082146	STRADB	protein_coding	Q9C0K7	63	71	85	86	67	76	90	76	64
ENSG00000082153	BZW1	protein_coding	Q7L1Q6	618	939	963	1393	975	1147	1160	1039	966
ENSG00000082175	PGR	protein_coding	P06401	0	0	0	0	0	0	0	0	0
ENSG00000082196	C1QTNF3	protein_coding	Q9BXJ4	0	0	0	0	0	2	1	0	0
ENSG00000082212	ME2	protein_coding	P23368	415	491	465	688	485	566	545	484	415
ENSG00000082213	C5orf22	protein_coding	Q49AR2	165	258	234	347	261	299	274	256	199
ENSG00000082258	CCNT2	protein_coding	O60583	167	243	287	424	411	416	307	271	239
ENSG00000082269	FAM135A	protein_coding	Q9P2D6	135	165	139	281	208	260	139	123	112
ENSG00000082293	COL19A1	protein_coding	Q14993	7	20	14	9	10	7	5	13	10
ENSG00000082397	EPB41L3	protein_coding	Q9Y2J2	539	789	647	815	549	664	775	672	686
ENSG00000082438	COBLL1	protein_coding	Q53SF7	156	232	181	233	233	252	213	198	162
ENSG00000082458	DLG3	protein_coding	Q92796	162	211	181	216	177	191	203	206	144
ENSG00000082482	KCNK2	protein_coding	O95069	0	0	0	0	2	0	0	0	0
ENSG00000082497	SERTAD4	protein_coding	Q9NUC0	0	0	0	0	0	0	0	0	0
ENSG00000082512	TRAF5	protein_coding	O00463	40	32	54	81	48	68	33	32	44
ENSG00000082515	MRPL22	protein_coding	Q9NWU5	561	727	695	789	497	573	879	773	661
ENSG00000082516	GEMIN5	protein_coding	Q8TEQ6	769	916	848	1283	970	1137	882	857	777
ENSG00000082556	OPRK1	protein_coding	P41145	0	0	0	0	0	0	0	0	0
ENSG00000082641	NFE2L1	protein_coding	Q14494	1149	1477	1311	1268	920	1150	1203	1102	856
ENSG00000082684	SEMA5B	protein_coding	Q9P283	4	8	2	6	1	4	1	1	1
ENSG00000082701	GSK3B	protein_coding	P49841	342	493	468	481	390	484	458	474	345
ENSG00000082781	ITGB5	protein_coding	P18084	60	125	84	101	82	92	75	96	66
ENSG00000082805	ERC1	protein_coding	Q8IUD2	320	356	330	423	291	414	374	340	296
ENSG00000082898	XPO1	protein_coding	O14980	2990	4022	3473	6122	4314	4907	3217	3074	2634
ENSG00000082929	LINC01587	processed_transcript	Q99440	0	0	0	0	0	0	0	0	0
ENSG00000082996	RNF13	protein_coding	O43567	186	237	229	280	230	248	240	189	173
ENSG00000083067	TRPM3	protein_coding	Q9HCF6	1	0	2	1	4	1	0	0	0
ENSG00000083093	PALB2	protein_coding	Q86YC2	243	257	263	391	355	374	304	229	244
ENSG00000083097	DOPEY1	protein_coding	Q5JWR5	195	283	248	424	376	400	241	202	186
ENSG00000083099	LYRM2	protein_coding	Q9NU23	206	336	308	585	460	490	353	370	259
ENSG00000083123	BCKDHB	protein_coding	P21953	122	188	163	175	130	169	201	181	166
ENSG00000083168	KAT6A	protein_coding	Q92794	513	722	608	747	605	682	652	554	466
ENSG00000083223	ZCCHC6	protein_coding	#N/A	499	577	478	798	553	760	574	574	454
ENSG00000083290	ULK2	protein_coding	Q8IYT8	76	103	101	112	67	92	82	80	59
ENSG00000083307	GRHL2	protein_coding	Q6ISB3	0	0	0	1	0	0	0	0	0
ENSG00000083312	TNPO1	protein_coding	Q92973	2801	3686	3322	4482	3211	3957	3267	3238	2772
ENSG00000083444	PLOD1	protein_coding	Q02809	707	935	902	621	468	545	732	657	494
ENSG00000083454	P2RX5	protein_coding	Q93086	1	3	1	6	2	1	1	0	0
ENSG00000083457	ITGAE	protein_coding	P38570	339	372	313	406	317	350	330	302	277
ENSG00000083520	DIS3	protein_coding	Q9Y2L1	4106	5591	4933	5629	4124	4892	6069	5487	4973
ENSG00000083535	PIBF1	protein_coding	Q8WXW3	491	561	560	1274	830	1045	709	588	554
ENSG00000083544	TDRD3	protein_coding	Q9H7E2	128	209	142	247	169	220	181	162	151
ENSG00000083622	AC000111.6	antisense	#N/A	0	0	0	0	0	0	0	0	0
ENSG00000083635	NUFIP1	protein_coding	Q9UHK0	130	206	199	216	172	164	251	221	208
ENSG00000083642	PDS5B	protein_coding	Q9NTI5	515	623	544	898	650	761	592	532	459
ENSG00000083720	OXCT1	protein_coding	P55809	399	494	436	832	543	581	615	565	418
ENSG00000083750	RRAGB	protein_coding	Q5VZM2	76	94	88	114	72	91	77	81	74
ENSG00000083782	EPYC	protein_coding	Q99645	0	0	0	0	0	0	0	0	0
ENSG00000083799	CYLD	protein_coding	Q9NQC7	251	377	343	488	415	552	322	351	261
ENSG00000083807	SLC27A5	protein_coding	Q9Y2P5	75	67	51	95	60	79	79	68	42
ENSG00000083812	ZNF324	protein_coding	O75467	108	149	140	142	110	138	136	133	115
ENSG00000083814	ZNF671	protein_coding	Q8TAW3	6	1	6	12	5	12	2	7	1
ENSG00000083817	ZNF416	protein_coding	Q9BWM5	67	77	87	71	49	67	96	96	67
ENSG00000083828	ZNF586	protein_coding	Q9NXT0	121	172	140	103	71	115	125	159	141
ENSG00000083838	ZNF446	protein_coding	Q9NWS9	36	47	48	33	37	28	32	34	23
ENSG00000083844	ZNF264	protein_coding	O43296	102	156	123	175	126	140	152	172	132
ENSG00000083845	RPS5	protein_coding	P46782	5107	6191	6336	6412	4767	5405	7206	6355	5411
ENSG00000083857	FAT1	protein_coding	Q14517	1308	1420	1109	1486	1194	1324	1133	1075	888
ENSG00000083896	YTHDC1	protein_coding	Q96MU7	39	75	48	102	45	46	65	90	57
ENSG00000083937	CHMP2B	protein_coding	Q9UQN3	599	755	670	1369	995	1064	979	847	688
ENSG00000084070	SMAP2	protein_coding	Q8WU79	439	511	530	718	544	712	560	531	462
ENSG00000084072	PPIE	protein_coding	Q9UNP9	701	876	777	853	548	673	894	856	741
ENSG00000084073	ZMPSTE24	protein_coding	O75844	1197	1702	1440	1633	1180	1292	1256	1265	992
ENSG00000084090	STARD7	protein_coding	Q9NQZ5	851	1081	969	1105	945	1162	1060	934	845
ENSG00000084092	NOA1	protein_coding	Q8NC60	357	412	362	398	282	325	362	385	316
ENSG00000084093	REST	protein_coding	Q13127	231	393	321	519	384	472	466	392	363
ENSG00000084110	HAL	protein_coding	P42357	3	2	0	6	4	11	1	4	6
ENSG00000084112	SSH1	protein_coding	Q8WYL5	182	246	195	283	219	317	182	170	136
ENSG00000084207	GSTP1	protein_coding	P09211	3050	3770	3260	2245	1547	1768	4334	4081	3202
ENSG00000084234	APLP2	protein_coding	Q06481	9894	14021	10780	7522	5354	6260	11649	10961	8430
ENSG00000084444	FAM234B	protein_coding	A2RU67	1898	2121	1753	1578	1092	1681	2028	1800	1682
ENSG00000084453	SLCO1A2	protein_coding	P46721	0	1	1	1	0	0	0	4	0
ENSG00000084463	WBP11	protein_coding	Q9Y2W2	883	1183	980	1399	945	1211	1348	1216	1035
ENSG00000084623	EIF3I	protein_coding	Q13347	4741	6931	6880	6309	4363	5639	8607	7898	6514
ENSG00000084628	NKAIN1	protein_coding	Q4KMZ8	29	19	33	22	19	20	10	18	11
ENSG00000084636	COL16A1	protein_coding	Q07092	2	3	2	1	4	2	1	1	3
ENSG00000084652	TXLNA	protein_coding	P40222	1586	1901	1959	2428	1816	2113	1998	1900	1583
ENSG00000084674	APOB	protein_coding	P04114	0	0	1	1	1	0	0	0	0
ENSG00000084676	NCOA1	protein_coding	Q15788	107	153	151	204	190	203	167	171	141
ENSG00000084693	AGBL5	protein_coding	Q8NDL9	774	837	611	724	550	622	679	613	521
ENSG00000084710	EFR3B	protein_coding	Q9Y2G0	35	68	48	56	43	52	66	53	39
ENSG00000084731	KIF3C	protein_coding	O14782	99	98	76	138	125	114	108	85	99
ENSG00000084733	RAB10	protein_coding	P61026	569	806	694	1025	693	799	813	778	584
ENSG00000084734	GCKR	protein_coding	Q14397	5	9	2	1	2	2	2	1	3
ENSG00000084754	HADHA	protein_coding	P40939	742	964	937	1422	987	1158	1133	1056	810
ENSG00000084764	MAPRE3	protein_coding	Q9UPY8	237	318	277	231	158	207	300	306	232
ENSG00000084774	CAD	protein_coding	P27708	2283	2936	2514	2803	1954	2592	2481	2416	1941
ENSG00000085063	CD59	protein_coding	P13987	313	495	417	496	458	468	408	367	360
ENSG00000085117	CD82	protein_coding	P27701	23	37	30	23	15	29	37	32	26
ENSG00000085185	BCORL1	protein_coding	Q5H9F3	737	930	873	920	734	809	1192	1113	950
ENSG00000085224	ATRX	protein_coding	P46100	655	751	633	1355	996	1140	821	687	590
ENSG00000085231	AK6	protein_coding	Q9Y3D8	0	0	0	0	0	0	0	0	0
ENSG00000085265	FCN1	protein_coding	O00602	0	0	0	0	0	0	0	0	0
ENSG00000085274	MYNN	protein_coding	Q9NPC7	187	312	242	210	174	264	244	290	224
ENSG00000085276	MECOM	protein_coding	Q03112	260	346	271	476	387	435	311	332	302
ENSG00000085365	SCAMP1	protein_coding	O15126	383	546	481	473	350	388	434	364	319
ENSG00000085377	PREP	protein_coding	P48147	992	1286	1170	1202	922	1048	1277	1178	1050
ENSG00000085382	HACE1	protein_coding	Q8IYU2	498	705	528	655	583	878	515	583	489
ENSG00000085415	SEH1L	protein_coding	Q96EE3	894	1043	956	1085	778	946	1080	975	884
ENSG00000085433	WDR47	protein_coding	O94967	261	358	325	405	336	399	325	333	282
ENSG00000085449	WDFY1	protein_coding	Q8IWB7	415	461	375	505	373	424	436	517	387
ENSG00000085465	OVGP1	protein_coding	Q12889	66	72	83	119	105	99	39	50	42
ENSG00000085491	SLC25A24	protein_coding	Q6NUK1	849	1042	989	1272	974	1129	1091	1037	925
ENSG00000085511	MAP3K4	protein_coding	Q9Y6R4	213	253	222	385	267	338	189	193	182
ENSG00000085514	PILRA	protein_coding	Q9UKJ1	4	2	3	2	2	6	4	1	1
ENSG00000085552	IGSF9	protein_coding	Q9P2J2	20	19	13	9	9	7	12	15	5
ENSG00000085563	ABCB1	protein_coding	P08183	115	153	176	176	137	149	163	153	79
ENSG00000085644	ZNF213	protein_coding	O14771	119	169	135	115	101	135	116	123	93
ENSG00000085662	AKR1B1	protein_coding	P15121	3498	4890	4392	2896	2246	2623	5695	5349	4902
ENSG00000085719	CPNE3	protein_coding	O75131	733	1141	963	1449	1000	1337	1315	1167	969
ENSG00000085721	RRN3	protein_coding	Q9NYV6	237	209	207	392	297	332	193	147	156
ENSG00000085733	CTTN	protein_coding	Q14247	1417	1727	1613	2031	1452	1769	1603	1542	1200
ENSG00000085741	WNT11	protein_coding	O96014	43	37	43	36	20	33	47	51	43
ENSG00000085760	MTIF2	protein_coding	P46199	461	482	449	976	658	721	505	498	380
ENSG00000085788	DDHD2	protein_coding	O94830	154	236	206	331	260	351	258	238	189
ENSG00000085831	TTC39A	protein_coding	Q5SRH9	41	45	60	49	40	52	58	46	42
ENSG00000085832	EPS15	protein_coding	P42566	653	805	683	930	732	877	711	731	639
ENSG00000085840	ORC1	protein_coding	Q13415	835	1011	957	1074	791	897	1359	1290	1108
ENSG00000085871	MGST2	protein_coding	Q99735	634	817	643	323	223	232	907	936	594
ENSG00000085872	CHERP	protein_coding	Q8IWX8	650	958	885	679	578	576	1002	1004	793
ENSG00000085978	ATG16L1	protein_coding	Q676U5	0	0	0	0	0	0	0	0	0
ENSG00000085982	USP40	protein_coding	Q9NVE5	199	237	188	310	275	320	162	151	140
ENSG00000085998	POMGNT1	protein_coding	Q8WZA1	125	188	137	154	138	191	126	119	107
ENSG00000085999	RAD54L	protein_coding	Q92698	289	382	374	552	373	513	342	315	268
ENSG00000086015	MAST2	protein_coding	Q6P0Q8	273	288	283	256	255	291	226	238	189
ENSG00000086061	DNAJA1	protein_coding	P31689	2906	3639	3707	5422	3650	4077	5970	5125	4650
ENSG00000086062	B4GALT1	protein_coding	P15291	885	1438	977	608	640	778	872	1092	905
ENSG00000086065	CHMP5	protein_coding	Q9NZZ3	702	1007	925	1028	845	873	1239	1105	824
ENSG00000086102	NFX1	protein_coding	Q12986	594	773	704	1203	933	1075	696	683	635
ENSG00000086159	AQP6	protein_coding	Q13520	4	3	2	5	0	14	1	1	3
ENSG00000086189	DIMT1	protein_coding	Q9UNQ2	394	557	544	734	528	590	551	495	454
ENSG00000086200	IPO11	protein_coding	Q9UI26	2129	3142	2727	3206	2303	3493	2943	3231	2494
ENSG00000086205	FOLH1	protein_coding	Q04609	3	3	0	3	0	1	5	0	0
ENSG00000086232	EIF2AK1	protein_coding	Q9BQI3	977	1306	1185	1411	1090	1298	1271	1052	1043
ENSG00000086288	NME8	protein_coding	Q8N427	0	0	0	0	0	0	0	0	0
ENSG00000086289	EPDR1	protein_coding	Q9UM22	33	69	51	29	15	31	36	39	29
ENSG00000086300	SNX10	protein_coding	Q9Y5X0	411	521	404	245	177	241	476	398	423
ENSG00000086475	SEPHS1	protein_coding	P49903	517	672	564	277	258	329	612	669	556
ENSG00000086504	MRPL28	protein_coding	Q13084	1010	1553	1310	878	706	726	1431	1254	1208
ENSG00000086506	HBQ1	protein_coding	P09105	18	23	26	24	15	22	10	25	15
ENSG00000086544	ITPKC	protein_coding	Q96DU7	136	194	171	170	164	193	154	159	114
ENSG00000086548	CEACAM6	protein_coding	P40199	0	0	0	0	0	0	0	0	0
ENSG00000086570	FAT2	protein_coding	Q9NYQ8	4	2	2	4	4	4	0	2	0
ENSG00000086589	RBM22	protein_coding	Q9NW64	1227	1493	1299	1235	975	1199	1733	1664	1380
ENSG00000086598	TMED2	protein_coding	Q15363	1036	1307	1411	2063	1459	1784	1522	1244	1109
ENSG00000086619	ERO1B	protein_coding	Q86YB8	547	886	722	649	530	587	701	602	533
ENSG00000086666	ZFAND6	protein_coding	Q6FIF0	425	576	605	792	587	688	841	699	601
ENSG00000086696	HSD17B2	protein_coding	P37059	0	0	0	0	0	0	0	0	0
ENSG00000086712	TXLNG	protein_coding	Q9NUQ3	688	874	758	1140	837	1034	920	771	726
ENSG00000086717	PPEF1	protein_coding	O14829	6	12	3	12	10	12	6	11	7
ENSG00000086730	LAT2	protein_coding	Q9GZY6	22	32	35	30	31	27	24	27	8
ENSG00000086758	HUWE1	protein_coding	Q7Z6Z7	6139	7636	6449	8384	6670	7393	6741	6345	5361
ENSG00000086827	ZW10	protein_coding	O43264	585	806	653	1067	902	1031	645	645	539
ENSG00000086848	ALG9	protein_coding	Q9H6U8	25	34	26	25	27	37	18	23	38
ENSG00000086967	MYBPC2	protein_coding	Q14324	0	6	1	0	2	2	4	2	2
ENSG00000086991	NOX4	protein_coding	Q9NPH5	0	0	0	0	0	0	1	0	0
ENSG00000087008	ACOX3	protein_coding	O15254	243	283	238	258	189	282	251	288	225
ENSG00000087053	MTMR2	protein_coding	Q13614	338	496	422	549	428	442	420	403	364
ENSG00000087074	PPP1R15A	protein_coding	O75807	748	825	795	695	502	669	1176	1009	804
ENSG00000087076	HSD17B14	protein_coding	Q9BPX1	20	44	26	16	28	16	50	35	32
ENSG00000087077	TRIP6	protein_coding	Q15654	599	761	664	441	323	433	660	552	536
ENSG00000087085	ACHE	protein_coding	P22303	116	136	98	59	37	63	95	80	71
ENSG00000087086	FTL	protein_coding	P02792	3510	4190	3394	1897	1185	1893	5341	5893	5486
ENSG00000087087	SRRT	protein_coding	Q9BXP5	2853	3645	3118	3180	2237	3068	3472	3321	2675
ENSG00000087088	BAX	protein_coding	Q07812	671	894	869	797	578	666	929	829	718
ENSG00000087095	NLK	protein_coding	Q9UBE8	33	54	52	66	57	57	43	47	36
ENSG00000087111	PIGS	protein_coding	Q96S52	1014	1390	1108	891	692	825	975	970	853
ENSG00000087116	ADAMTS2	protein_coding	O95450	20	37	18	21	14	31	29	21	15
ENSG00000087128	TMPRSS11E	protein_coding	Q9UL52	0	0	0	0	0	0	0	0	0
ENSG00000087152	ATXN7L3	protein_coding	Q14CW9	364	447	358	402	342	429	353	321	260
ENSG00000087157	PGS1	protein_coding	Q32NB8	201	236	242	197	164	164	217	169	140
ENSG00000087191	PSMC5	protein_coding	P62195	2480	3274	2923	3117	2270	2984	2854	3104	2290
ENSG00000087206	UIMC1	protein_coding	Q96RL1	984	965	860	985	765	907	1035	880	722
ENSG00000087237	CETP	protein_coding	P11597	7	5	4	6	1	1	1	0	0
ENSG00000087245	MMP2	protein_coding	P08253	54	43	36	38	16	33	44	56	23
ENSG00000087250	MT3	protein_coding	P25713	0	0	0	0	0	0	0	0	0
ENSG00000087253	LPCAT2	protein_coding	Q7L5N7	68	88	89	114	73	98	102	115	65
ENSG00000087258	GNAO1	protein_coding	P09471	22	46	27	33	26	23	19	28	20
ENSG00000087263	OGFOD1	protein_coding	Q8N543	662	919	875	1420	944	1143	1150	1128	860
ENSG00000087266	SH3BP2	protein_coding	P78314	150	170	151	156	117	106	133	122	113
ENSG00000087269	NOP14	protein_coding	P78316	2733	3356	2773	2587	1953	2599	3231	3372	2602
ENSG00000087274	ADD1	protein_coding	P35611	1106	1499	1265	1391	1160	1351	1420	1395	1087
ENSG00000087299	L2HGDH	protein_coding	Q9H9P8	162	223	201	224	177	214	240	224	187
ENSG00000087301	TXNDC16	protein_coding	Q9P2K2	206	279	203	439	309	383	219	234	197
ENSG00000087302	C14orf166	protein_coding	#N/A	1739	2620	2544	3299	2290	2778	2930	2724	2452
ENSG00000087303	NID2	protein_coding	Q14112	428	669	484	285	221	215	293	383	323
ENSG00000087338	GMCL1	protein_coding	Q96IK5	137	189	181	227	200	267	173	132	106
ENSG00000087365	SF3B2	protein_coding	Q13435	5628	6538	6434	7282	5177	6042	7786	7075	5706
ENSG00000087448	KLHL42	protein_coding	Q9P2K6	96	147	133	124	113	136	107	105	79
ENSG00000087460	GNAS	protein_coding	Q5JWF2	16753	21279	16950	21332	15025	19618	22437	22191	17968
ENSG00000087470	DNM1L	protein_coding	O00429	524	698	623	1017	755	931	653	635	528
ENSG00000087494	PTHLH	protein_coding	P12272	13	9	7	10	2	4	17	10	12
ENSG00000087495	PHACTR3	protein_coding	Q96KR7	2	7	5	6	4	6	6	8	4
ENSG00000087502	ERGIC2	protein_coding	Q96RQ1	165	215	180	366	274	273	190	131	121
ENSG00000087510	TFAP2C	protein_coding	Q92754	46	71	66	61	36	44	69	65	40
ENSG00000087586	AURKA	protein_coding	O14965	1547	2359	1954	1522	1217	1406	2078	1891	1836
ENSG00000087589	CASS4	protein_coding	Q9NQ75	9	22	7	23	21	19	9	17	6
ENSG00000087842	PIR	protein_coding	O00625	138	187	146	138	106	136	200	199	177
ENSG00000087884	AAMDC	protein_coding	Q9H7C9	88	135	103	161	104	127	127	133	95
ENSG00000087903	RFX2	protein_coding	P48378	114	134	116	95	79	79	117	82	89
ENSG00000087995	METTL2A	protein_coding	Q96IZ6	160	186	213	303	240	258	220	195	177
ENSG00000088002	SULT2B1	protein_coding	O00204	24	18	21	23	8	10	18	28	12
ENSG00000088035	ALG6	protein_coding	Q9Y672	638	896	743	792	602	683	619	655	537
ENSG00000088038	CNOT3	protein_coding	O75175	1	3	0	3	3	5	4	7	2
ENSG00000088053	GP6	protein_coding	Q9HCN6	0	0	0	0	0	0	0	0	0
ENSG00000088179	PTPN4	protein_coding	P29074	85	101	78	121	119	118	94	67	69
ENSG00000088205	DDX18	protein_coding	Q9NVP1	1180	1594	1555	2798	1854	2210	1779	1571	1330
ENSG00000088247	KHSRP	protein_coding	Q92945	3846	4760	4238	3816	2926	3373	4730	4557	3917
ENSG00000088256	GNA11	protein_coding	P29992	443	465	459	399	296	352	446	424	351
ENSG00000088280	ASAP3	protein_coding	Q8TDY4	0	0	0	0	0	0	0	0	0
ENSG00000088298	EDEM2	protein_coding	Q9BV94	243	356	343	281	215	273	293	287	276
ENSG00000088305	DNMT3B	protein_coding	Q9UBC3	229	262	265	289	191	232	322	286	205
ENSG00000088320	REM1	protein_coding	O75628	0	0	0	0	0	0	2	0	1
ENSG00000088325	TPX2	protein_coding	Q9ULW0	1964	2651	2137	2810	1942	2282	2835	2598	2189
ENSG00000088340	FER1L4	transcribed_unitary_pseudogene	A9Z1Z3	21	13	12	18	20	11	17	13	22
ENSG00000088356	PDRG1	protein_coding	Q9NUG6	631	819	672	626	444	545	958	1008	847
ENSG00000088367	EPB41L1	protein_coding	Q9H4G0	102	149	119	87	83	102	147	136	109
ENSG00000088386	SLC15A1	protein_coding	P46059	2	6	4	3	1	1	6	8	1
ENSG00000088387	DOCK9	protein_coding	Q9BZ29	220	222	212	314	254	308	213	225	156
ENSG00000088448	ANKRD10	protein_coding	Q9NXR5	274	307	284	433	372	348	308	188	193
ENSG00000088451	TGDS	protein_coding	O95455	339	464	454	734	499	628	495	445	389
ENSG00000088538	DOCK3	protein_coding	Q8IZD9	257	304	250	339	286	340	211	199	174
ENSG00000088543	C3orf18	protein_coding	Q9UK00	17	28	24	23	27	26	28	28	24
ENSG00000088682	COQ9	protein_coding	O75208	212	262	256	232	197	227	264	197	170
ENSG00000088726	TMEM40	protein_coding	Q8WWA1	3	1	0	0	0	2	0	2	0
ENSG00000088727	KIF9	protein_coding	Q9HAQ2	93	129	153	106	113	117	135	105	107
ENSG00000088756	ARHGAP28	protein_coding	Q9P2N2	14	34	20	16	23	29	31	22	23
ENSG00000088766	CRLS1	protein_coding	Q9UJA2	144	238	223	273	237	259	198	154	151
ENSG00000088782	DEFB127	protein_coding	Q9H1M4	0	0	0	0	0	0	0	0	0
ENSG00000088808	PPP1R13B	protein_coding	Q96KQ4	239	300	271	257	204	269	251	271	215
ENSG00000088812	ATRN	protein_coding	O75882	484	664	525	687	442	546	505	419	372
ENSG00000088826	SMOX	protein_coding	Q9NWM0	52	73	67	53	55	53	59	54	44
ENSG00000088827	SIGLEC1	protein_coding	Q9BZZ2	0	0	2	0	0	0	1	0	0
ENSG00000088832	FKBP1A	protein_coding	P62942	453	470	408	265	228	264	590	513	440
ENSG00000088833	NSFL1C	protein_coding	Q9UNZ2	736	906	943	764	618	617	1102	966	847
ENSG00000088836	SLC4A11	protein_coding	Q8NBS3	57	106	58	80	53	66	82	68	63
ENSG00000088854	C20orf194	protein_coding	Q5TEA3	194	244	226	311	231	293	208	201	189
ENSG00000088876	ZNF343	protein_coding	Q6P1L6	68	108	91	92	108	101	74	62	82
ENSG00000088881	EBF4	protein_coding	Q9BQW3	38	50	39	20	16	19	34	38	38
ENSG00000088882	CPXM1	protein_coding	Q96SM3	0	0	2	0	1	0	0	0	0
ENSG00000088888	MAVS	protein_coding	Q7Z434	300	417	400	392	320	412	360	377	336
ENSG00000088899	LZTS3	protein_coding	O60299	144	135	140	111	122	119	128	107	105
ENSG00000088926	F11	protein_coding	P03951	0	0	1	0	0	0	0	0	0
ENSG00000088930	XRN2	protein_coding	Q9H0D6	786	1082	982	1612	1229	1381	1097	1046	811
ENSG00000088970	KIZ	protein_coding	Q2M2Z5	165	213	226	282	226	242	238	201	192
ENSG00000088986	DYNLL1	protein_coding	P63167	949	1333	1386	1482	1236	1420	1511	1397	1173
ENSG00000088992	TESC	protein_coding	Q96BS2	55	86	71	55	34	51	66	53	47
ENSG00000089006	SNX5	protein_coding	Q9Y5X3	2461	3204	2841	2651	2122	2387	3555	3243	2774
ENSG00000089009	RPL6	protein_coding	Q02878	930	1458	1612	2403	1596	1491	2066	2123	1251
ENSG00000089012	SIRPG	protein_coding	Q9P1W8	0	0	0	0	0	0	0	0	0
ENSG00000089022	MAPKAPK5	protein_coding	Q8IW41	126	150	137	185	177	194	162	96	96
ENSG00000089041	P2RX7	protein_coding	Q99572	0	1	1	0	1	1	1	0	0
ENSG00000089048	ESF1	protein_coding	Q9H501	975	1025	968	1651	1174	1408	1213	1036	904
ENSG00000089050	RBBP9	protein_coding	O75884	76	101	71	90	51	69	90	60	50
ENSG00000089053	ANAPC5	protein_coding	Q9UJX4	2496	3237	2929	2284	1821	2151	2843	2713	2275
ENSG00000089057	SLC23A2	protein_coding	Q9UGH3	443	641	468	395	354	432	467	469	418
ENSG00000089060	SLC8B1	protein_coding	Q6J4K2	105	123	83	83	71	95	83	81	67
ENSG00000089063	TMEM230	protein_coding	Q96A57	189	282	222	158	185	165	242	193	176
ENSG00000089091	DZANK1	protein_coding	Q9NVP4	40	59	45	69	47	67	49	37	34
ENSG00000089094	KDM2B	protein_coding	Q8NHM5	309	333	274	394	327	387	272	246	187
ENSG00000089101	CFAP61	protein_coding	Q8NHU2	4	4	3	7	3	4	5	3	3
ENSG00000089116	LHX5	protein_coding	Q9H2C1	0	0	1	0	0	0	0	1	0
ENSG00000089123	TASP1	protein_coding	Q9H6P5	63	101	86	99	83	79	77	73	53
ENSG00000089127	OAS1	protein_coding	P00973	0	0	0	0	1	0	2	0	0
ENSG00000089154	GCN1	protein_coding	Q92616	2682	3255	2926	2831	2327	2736	2393	2224	1968
ENSG00000089157	RPLP0	protein_coding	P05388	2925	3473	3391	2232	1928	2193	3506	3010	3019
ENSG00000089159	PXN	protein_coding	P49023	436	458	363	330	231	274	360	461	361
ENSG00000089163	SIRT4	protein_coding	Q9Y6E7	27	32	28	24	30	31	19	38	21
ENSG00000089169	RPH3A	protein_coding	Q9Y2J0	0	0	0	0	0	3	0	1	0
ENSG00000089177	KIF16B	protein_coding	Q96L93	369	479	363	496	368	440	420	378	305
ENSG00000089195	TRMT6	protein_coding	Q9UJA5	540	660	591	750	567	690	631	627	486
ENSG00000089199	CHGB	protein_coding	P05060	14	18	18	12	13	15	20	10	5
ENSG00000089220	PEBP1	protein_coding	P30086	2892	4065	3161	2047	1541	1702	3858	3845	3477
ENSG00000089225	TBX5	protein_coding	Q99593	0	0	0	0	0	0	0	0	0
ENSG00000089234	BRAP	protein_coding	Q7Z569	406	486	412	540	400	503	556	518	463
ENSG00000089248	ERP29	protein_coding	P30040	1595	2215	1685	1322	878	1048	2022	2059	1634
ENSG00000089250	NOS1	protein_coding	P29475	0	0	0	0	1	0	1	0	0
ENSG00000089280	FUS	protein_coding	P35637	7522	11288	10517	10701	8347	11224	11910	13471	11046
ENSG00000089289	IGBP1	protein_coding	P78318	282	352	290	339	236	265	317	346	248
ENSG00000089327	FXYD5	protein_coding	Q96DB9	434	670	452	234	206	245	472	694	430
ENSG00000089335	ZNF302	protein_coding	Q9NR11	88	141	79	138	126	146	117	85	82
ENSG00000089351	GRAMD1A	protein_coding	Q96CP6	671	771	720	763	548	731	625	571	527
ENSG00000089356	FXYD3	protein_coding	Q14802	1	0	2	0	0	1	0	0	0
ENSG00000089472	HEPH	protein_coding	Q9BQS7	0	0	0	0	0	0	0	1	0
ENSG00000089486	CDIP1	protein_coding	Q9H305	23	27	35	15	9	22	24	31	15
ENSG00000089505	CMTM1	protein_coding	Q8IZ96	1	4	4	1	2	9	4	1	3
ENSG00000089558	KCNH4	protein_coding	Q9UQ05	7	7	6	9	4	9	6	8	1
ENSG00000089597	GANAB	protein_coding	Q14697	10681	14452	12510	8711	6478	7386	10668	9989	8920
ENSG00000089639	GMIP	protein_coding	Q9P107	220	209	181	184	135	221	197	208	173
ENSG00000089682	RBM41	protein_coding	Q96IZ5	286	349	303	428	360	346	307	270	232
ENSG00000089685	BIRC5	protein_coding	O15392	980	1248	1052	1107	806	1033	1265	1171	989
ENSG00000089692	LAG3	protein_coding	P18627	1	0	1	1	0	2	5	0	1
ENSG00000089693	MLF2	protein_coding	Q15773	1216	1439	1204	1446	1111	1185	1195	1292	954
ENSG00000089723	OTUB2	protein_coding	Q96DC9	0	0	0	1	1	0	0	0	0
ENSG00000089737	DDX24	protein_coding	Q9GZR7	12	20	18	14	7	4	25	6	8
ENSG00000089775	ZBTB25	protein_coding	P24278	104	124	103	137	131	136	83	93	90
ENSG00000089818	NECAP1	protein_coding	Q8NC96	484	623	595	541	401	532	687	592	515
ENSG00000089820	ARHGAP4	protein_coding	P98171	31	35	25	17	24	20	18	15	11
ENSG00000089847	ANKRD24	protein_coding	#N/A	66	69	46	39	35	29	42	43	45
ENSG00000089876	DHX32	protein_coding	Q7L7V1	153	183	170	263	259	223	153	121	123
ENSG00000089902	RCOR1	protein_coding	Q9UKL0	301	412	379	397	324	445	478	448	386
ENSG00000089916	GPATCH2L	protein_coding	Q9NWQ4	291	394	320	502	308	459	375	359	281
ENSG00000090006	LTBP4	protein_coding	Q8N2S1	388	477	370	292	226	271	299	303	222
ENSG00000090013	BLVRB	protein_coding	P30043	483	590	537	388	264	289	657	542	549
ENSG00000090020	SLC9A1	protein_coding	P19634	264	284	232	203	212	230	209	175	167
ENSG00000090054	SPTLC1	protein_coding	O15269	1206	1482	1203	1737	1282	1623	1272	1207	1072
ENSG00000090060	PAPOLA	protein_coding	P51003	426	551	431	948	651	721	489	451	405
ENSG00000090061	CCNK	protein_coding	O75909	490	628	508	344	231	250	589	504	429
ENSG00000090097	PCBP4	protein_coding	P57723	56	64	58	47	35	31	68	68	64
ENSG00000090104	RGS1	protein_coding	Q08116	0	0	0	0	0	0	0	0	0
ENSG00000090238	YPEL3	protein_coding	P61236	186	261	214	170	143	144	270	234	262
ENSG00000090263	MRPS33	protein_coding	Q9Y291	762	1028	937	1075	832	915	1222	1158	972
ENSG00000090266	NDUFB2	protein_coding	O95178	1462	1713	1712	1762	1138	1470	1969	1916	1512
ENSG00000090273	NUDC	protein_coding	Q9Y266	1231	1549	1572	1545	1102	1487	1757	1680	1282
ENSG00000090316	MAEA	protein_coding	Q7L5Y9	802	1035	988	882	630	775	1173	1139	937
ENSG00000090339	ICAM1	protein_coding	P05362	2	10	2	10	5	3	3	1	0
ENSG00000090372	STRN4	protein_coding	Q9NRL3	1309	1640	1182	633	518	549	1030	973	900
ENSG00000090376	IRAK3	protein_coding	Q9Y616	1	0	5	3	0	1	2	1	0
ENSG00000090382	LYZ	protein_coding	P61626	0	0	0	0	0	0	0	0	0
ENSG00000090402	SI	protein_coding	P14410	1	0	0	0	2	0	0	0	0
ENSG00000090432	MUL1	protein_coding	Q969V5	233	318	292	214	199	228	304	291	218
ENSG00000090447	TFAP4	protein_coding	Q01664	276	369	333	223	160	179	365	312	277
ENSG00000090470	PDCD7	protein_coding	Q8N8D1	214	253	243	198	139	207	244	231	214
ENSG00000090487	SPG21	protein_coding	Q9NZD8	339	497	301	259	215	246	297	352	323
ENSG00000090512	FETUB	protein_coding	Q9UGM5	0	0	0	0	0	2	0	0	0
ENSG00000090520	DNAJB11	protein_coding	Q9UBS4	1443	2006	2034	1926	1431	1595	2044	1755	1467
ENSG00000090530	P3H2	protein_coding	Q8IVL5	25	26	21	34	17	20	30	35	19
ENSG00000090534	THPO	protein_coding	P40225	2	0	1	2	1	2	8	1	4
ENSG00000090539	CHRD	protein_coding	Q9H2X0	25	28	18	11	12	15	21	10	11
ENSG00000090554	FLT3LG	protein_coding	P49771	6	4	5	5	6	5	1	2	2
ENSG00000090565	RAB11FIP3	protein_coding	O75154	1	0	9	2	4	6	2	7	4
ENSG00000090581	GNPTG	protein_coding	Q9UJJ9	190	230	218	106	81	124	196	223	145
ENSG00000090612	ZNF268	protein_coding	Q14587	30	38	38	86	50	82	54	38	27
ENSG00000090615	GOLGA3	protein_coding	Q08378	810	1037	892	835	759	841	677	721	602
ENSG00000090621	PABPC4	protein_coding	Q13310	990	1218	1135	1196	968	1123	1108	1000	865
ENSG00000090659	CD209	protein_coding	Q9NNX6	19	35	21	32	44	37	29	46	31
ENSG00000090661	CERS4	protein_coding	Q9HA82	88	80	63	89	55	50	124	85	66
ENSG00000090674	MCOLN1	protein_coding	Q9GZU1	167	248	188	138	104	131	204	187	131
ENSG00000090686	USP48	protein_coding	Q86UV5	1228	1670	1523	1534	1136	1425	1510	1613	1259
ENSG00000090776	EFNB1	protein_coding	P98172	100	131	116	113	103	110	115	118	88
ENSG00000090857	PDPR	protein_coding	Q8NCN5	211	352	267	275	246	313	288	284	266
ENSG00000090861	AARS	protein_coding	P49588	12238	15601	12559	9999	7240	9476	14183	14301	12850
ENSG00000090863	GLG1	protein_coding	Q92896	5328	6927	5481	4308	3222	4094	4726	4893	3867
ENSG00000090889	KIF4A	protein_coding	O95239	679	803	743	1154	822	1011	974	880	712
ENSG00000090905	TNRC6A	protein_coding	Q8NDV7	358	487	448	632	468	580	388	383	269
ENSG00000090924	PLEKHG2	protein_coding	Q9H7P9	185	164	158	184	121	161	158	153	114
ENSG00000090932	DLL3	protein_coding	Q9NYJ7	56	54	53	35	22	53	48	56	40
ENSG00000090971	NAT14	protein_coding	Q8WUY8	271	266	212	166	134	162	236	229	209
ENSG00000090975	PITPNM2	protein_coding	Q9BZ72	73	69	60	58	40	54	33	64	38
ENSG00000090989	EXOC1	protein_coding	Q9NV70	313	350	403	548	367	464	382	354	318
ENSG00000091009	RBM27	protein_coding	Q9P2N5	163	189	131	291	161	220	198	173	106
ENSG00000091010	POU4F3	protein_coding	Q15319	3	1	1	0	0	1	0	0	0
ENSG00000091039	OSBPL8	protein_coding	Q9BZF1	423	542	490	711	614	641	548	481	430
ENSG00000091073	DTX2	protein_coding	Q86UW9	22	17	13	22	13	19	12	15	13
ENSG00000091106	NLRC4	protein_coding	Q9NPP4	9	13	9	14	12	7	4	2	3
ENSG00000091127	PUS7	protein_coding	Q96PZ0	533	682	598	820	632	731	630	602	437
ENSG00000091128	LAMB4	protein_coding	A4D0S4	0	4	3	1	2	1	0	1	1
ENSG00000091129	NRCAM	protein_coding	Q92823	311	474	340	278	192	205	302	340	233
ENSG00000091136	LAMB1	protein_coding	P07942	1341	1547	1309	1278	937	1085	1112	1027	863
ENSG00000091137	SLC26A4	protein_coding	O43511	2	1	0	3	1	0	2	3	0
ENSG00000091138	SLC26A3	protein_coding	P40879	1	0	0	1	0	0	2	0	0
ENSG00000091140	DLD	protein_coding	P09622	1436	1891	1681	2364	1595	1860	1909	1596	1450
ENSG00000091157	WDR7	protein_coding	Q9Y4E6	128	190	171	253	177	221	149	147	126
ENSG00000091164	TXNL1	protein_coding	O43396	1077	1382	1323	1645	1193	1408	1601	1478	1324
ENSG00000091181	IL5RA	protein_coding	Q01344	0	3	0	1	2	4	1	4	1
ENSG00000091262	ABCC6	protein_coding	O95255	0	0	0	0	0	0	0	0	0
ENSG00000091317	CMTM6	protein_coding	Q9NX76	360	507	436	471	314	433	392	398	368
ENSG00000091409	ITGA6	protein_coding	P23229	430	645	483	493	415	528	424	498	354
ENSG00000091428	RAPGEF4	protein_coding	Q8WZA2	46	57	45	85	51	74	53	45	35
ENSG00000091436	AC013461.1	protein_coding	#N/A	188	275	266	392	280	314	354	299	227
ENSG00000091482	SMPX	protein_coding	Q9UHP9	0	0	0	0	0	0	0	3	0
ENSG00000091483	FH	protein_coding	P07954	2360	3442	2899	3020	2308	2814	3483	3516	3057
ENSG00000091490	SEL1L3	protein_coding	Q68CR1	59	71	78	92	68	67	68	49	36
ENSG00000091513	TF	protein_coding	P02787	1	3	0	0	2	1	6	1	3
ENSG00000091527	CDV3	protein_coding	Q9UKY7	974	1079	1091	1468	1095	1338	1246	1142	948
ENSG00000091536	MYO15A	protein_coding	Q9UKN7	22	6	4	11	7	15	6	5	8
ENSG00000091542	ALKBH5	protein_coding	Q6P6C2	547	751	738	831	727	857	694	612	519
ENSG00000091583	APOH	protein_coding	P02749	0	0	0	0	0	0	0	0	0
ENSG00000091592	NLRP1	protein_coding	Q9C000	161	202	159	102	68	87	180	223	164
ENSG00000091622	PITPNM3	protein_coding	Q9BZ71	38	49	49	33	46	38	38	17	27
ENSG00000091640	SPAG7	protein_coding	O75391	373	367	331	300	215	242	329	302	300
ENSG00000091651	ORC6	protein_coding	Q9Y5N6	1222	1716	1634	1376	975	1223	2025	2080	1884
ENSG00000091656	ZFHX4	protein_coding	Q86UP3	302	356	321	412	311	380	353	329	256
ENSG00000091664	SLC17A6	protein_coding	Q9P2U8	0	0	0	0	0	0	0	0	0
ENSG00000091704	CPA1	protein_coding	P15085	0	0	2	0	0	0	0	0	1
ENSG00000091732	ZC3HC1	protein_coding	Q86WB0	402	487	436	519	401	450	475	396	391
ENSG00000091831	ESR1	protein_coding	P03372	0	0	0	1	2	3	0	0	0
ENSG00000091844	RGS17	protein_coding	Q9UGC6	16	32	29	31	39	28	34	28	28
ENSG00000091879	ANGPT2	protein_coding	O15123	1	3	0	3	2	5	2	1	0
ENSG00000091947	TMEM101	protein_coding	Q96IK0	342	393	392	346	274	305	394	337	302
ENSG00000091972	CD200	protein_coding	P41217	0	0	0	0	0	0	0	0	0
ENSG00000091986	CCDC80	protein_coding	Q76M96	106	151	113	116	85	113	139	133	106
ENSG00000092009	CMA1	protein_coding	P23946	0	1	0	0	0	0	0	0	0
ENSG00000092010	PSME1	protein_coding	Q06323	408	535	541	610	350	478	678	673	521
ENSG00000092020	PPP2R3C	protein_coding	Q969Q6	175	227	224	333	281	302	246	199	189
ENSG00000092036	HAUS4	protein_coding	Q9H6D7	198	252	246	233	167	216	379	333	324
ENSG00000092051	JPH4	protein_coding	Q96JJ6	4	3	0	4	4	3	3	0	1
ENSG00000092054	MYH7	protein_coding	P12883	0	0	0	0	0	1	0	0	0
ENSG00000092067	CEBPE	protein_coding	Q15744	0	0	0	1	0	0	0	0	0
ENSG00000092068	SLC7A8	protein_coding	Q9UHI5	198	301	232	241	170	237	250	221	192
ENSG00000092094	OSGEP	protein_coding	Q9NPF4	864	1116	1006	1005	779	867	987	999	826
ENSG00000092096	SLC22A17.1	protein_coding	#N/A	18	30	28	13	21	24	18	23	24
ENSG00000092098	RNF31	protein_coding	Q96EP0	119	131	116	110	72	99	116	114	104
ENSG00000092108	SCFD1	protein_coding	Q8WVM8	508	790	713	1037	798	885	723	641	612
ENSG00000092140	G2E3	protein_coding	Q7L622	263	293	265	477	314	395	264	222	191
ENSG00000092148	HECTD1	protein_coding	Q9ULT8	1357	1631	1471	2087	1686	1912	1314	1358	1088
ENSG00000092199	HNRNPC	protein_coding	P07910	9795	16896	11629	6647	4802	5636	14159	12921	12770
ENSG00000092200	RPGRIP1	protein_coding	Q96KN7	5	9	5	12	8	16	5	5	6
ENSG00000092201	SUPT16H	protein_coding	Q9Y5B9	3685	4573	4508	7176	5247	6420	5314	5033	4225
ENSG00000092203	TOX4	protein_coding	O94842	280	394	354	450	355	425	462	357	343
ENSG00000092208	GEMIN2	protein_coding	O14893	389	521	436	550	395	440	482	447	370
ENSG00000092295	TGM1	protein_coding	P22735	15	22	15	10	16	15	4	9	5
ENSG00000092330	TINF2	protein_coding	Q9BSI4	193	246	189	141	134	143	178	163	162
ENSG00000092345	DAZL	protein_coding	Q92904	0	0	0	0	0	0	0	0	0
ENSG00000092377	TBL1Y	protein_coding	Q9BQ87	1	0	4	0	1	2	0	1	3
ENSG00000092421	SEMA6A	protein_coding	Q9H2E6	142	191	177	231	169	191	183	179	126
ENSG00000092439	TRPM7	protein_coding	Q96QT4	347	397	410	641	496	634	352	427	335
ENSG00000092445	TYRO3	protein_coding	Q06418	101	140	124	85	77	66	92	85	86
ENSG00000092470	WDR76	protein_coding	Q9H967	620	890	787	895	637	950	818	763	727
ENSG00000092529	CAPN3	protein_coding	P20807	0	0	2	0	1	2	2	0	1
ENSG00000092531	SNAP23	protein_coding	O00161	314	462	427	682	478	585	616	559	481
ENSG00000092607	TBX15	protein_coding	Q96SF7	0	0	1	0	1	1	0	0	0
ENSG00000092621	PHGDH	protein_coding	O43175	6873	9668	8821	6616	5077	6185	10499	10211	8270
ENSG00000092758	COL9A3	protein_coding	Q14050	17	22	11	9	8	12	14	14	9
ENSG00000092820	EZR	protein_coding	P15311	1270	1450	1395	1562	1185	1333	1921	1765	1440
ENSG00000092841	MYL6	protein_coding	P60660	3073	3922	2729	3147	2219	2206	4523	4360	2931
ENSG00000092847	AGO1	protein_coding	Q9UL18	379	459	393	360	297	398	355	364	315
ENSG00000092850	TEKT2	protein_coding	Q9UIF3	15	11	9	18	7	15	8	13	9
ENSG00000092853	CLSPN	protein_coding	Q9HAW4	1526	1890	1610	2225	1574	2011	1886	1902	1605
ENSG00000092871	RFFL	protein_coding	Q8WZ73	23	43	30	48	58	52	33	32	28
ENSG00000092929	UNC13D	protein_coding	Q70J99	7	11	11	16	10	9	11	9	6
ENSG00000092931	MFSD11	protein_coding	O43934	349	512	416	446	295	423	433	493	297
ENSG00000092964	DPYSL2	protein_coding	Q16555	337	482	441	371	287	324	520	568	457
ENSG00000092969	TGFB2	protein_coding	P61812	13	15	15	20	11	13	16	13	11
ENSG00000092978	GPATCH2	protein_coding	Q9NW75	575	731	635	865	625	763	784	783	660
ENSG00000093000	NUP50	protein_coding	Q9UKX7	223	348	257	398	332	399	265	209	215
ENSG00000093009	CDC45	protein_coding	O75419	4022	5493	4577	3166	2339	3481	4787	5789	4241
ENSG00000093010	COMT	protein_coding	P21964	593	806	720	510	443	451	668	609	504
ENSG00000093072	CECR1	protein_coding	#N/A	1	6	1	1	1	4	2	4	1
ENSG00000093100	XXbac-B461K10.4	processed_transcript	#N/A	0	0	0	0	1	0	0	0	0
ENSG00000093134	VNN3	protein_coding	Q9NY84	0	0	0	0	0	0	0	0	0
[truncated: 55,994 more rows]

## Sheet: ERM dynamics
Ensemble Gene ID	Gene name	Gene type	UniprotID	Log2 (ERM Enrich Tg/Basal)	P-adj (ERM Enrich Tg/Basal)	Dynamic type
ENSG00000000003	TSPAN6	protein_coding	O43657	-0.43546	0.0118297	Other
ENSG00000000005	TNMD	protein_coding	Q9H2S6	-0.706094	0.480459	Other
ENSG00000000419	DPM1	protein_coding	O60762	-0.237403	0.261185	Other
ENSG00000000457	SCYL3	protein_coding	Q8IZE3	-0.101768	0.717587	Other
ENSG00000000460	C1orf112	protein_coding	#N/A	-0.40055	0.00902735	Other
ENSG00000000938	FGR	protein_coding	P09769	-3.44929	NA	Other
ENSG00000000971	CFH	protein_coding	P08603	-1.76567	NA	Other
ENSG00000001036	FUCA2	protein_coding	Q9BTY2	-0.295615	0.0805531	Other
ENSG00000001084	GCLC	protein_coding	P48506	0.30462	0.0870545	Other
ENSG00000001167	NFYA	protein_coding	P23511	0.0024605	0.993724	Other
ENSG00000001460	STPG1	protein_coding	Q5TH74	-0.00416992	0.993063	Other
ENSG00000001461	NIPAL3	protein_coding	Q6P499	0.481232	0.0198232	Stress-activated
ENSG00000001497	LAS1L	protein_coding	Q9Y4W2	-0.535527	0.000280249	Other
ENSG00000001561	ENPP4	protein_coding	Q9Y6X5	0.138079	0.741659	Other
ENSG00000001617	SEMA3F	protein_coding	Q13275	-0.0365251	0.936619	Other
ENSG00000001626	CFTR	protein_coding	P13569	3.10978	NA	Other
ENSG00000001629	ANKIB1	protein_coding	Q9P2G1	0.168373	0.522697	Other
ENSG00000001630	CYP51A1	protein_coding	Q16850	-0.0454738	0.939581	Other
ENSG00000001631	KRIT1	protein_coding	O00522	-0.304655	0.259402	Other
ENSG00000002016	RAD52	protein_coding	P43351	0.520708	0.00542236	Other
ENSG00000002079	MYH16	unitary_pseudogene	Q9H6N6	0.632984	0.465659	Other
ENSG00000002330	BAD	protein_coding	Q92934	0.421263	0.0859657	Other
ENSG00000002549	LAP3	protein_coding	P28838	-0.437461	0.00236951	Other
ENSG00000002586	CD99	protein_coding	P14209	0.163187	0.386682	Other
ENSG00000002587	HS3ST1	protein_coding	O14792	-0.583924	NA	Other
ENSG00000002726	AOC1	protein_coding	P19801	NA	NA	Other
ENSG00000002745	WNT16	protein_coding	Q9UBV4	0.554821	NA	Other
ENSG00000002746	HECW1	protein_coding	Q76N89	-0.71164	NA	Other
ENSG00000002822	MAD1L1	protein_coding	Q9Y6D9	0.0209511	0.92802	Other
ENSG00000002834	LASP1	protein_coding	Q14847	-0.597025	0.000728556	Other
ENSG00000002919	SNX11	protein_coding	Q9Y5W9	0.235962	0.303133	Other
ENSG00000002933	TMEM176A	protein_coding	Q96HP8	NA	NA	Other
ENSG00000003056	M6PR	protein_coding	P20645	0.000710977	0.998433	Other
ENSG00000003096	KLHL13	protein_coding	Q9P2N7	-1.02138	2.80773e-09	Other
ENSG00000003137	CYP26B1	protein_coding	Q9NR63	-0.205821	0.71344	Other
ENSG00000003147	ICA1	protein_coding	Q05084	0.451176	0.233543	Other
ENSG00000003249	DBNDD1	protein_coding	Q9H9R9	0.20413	0.594869	Other
ENSG00000003393	ALS2	protein_coding	Q96Q42	-0.0520793	0.843746	Other
ENSG00000003400	CASP10	protein_coding	Q92851	0.0582207	0.901406	Other
ENSG00000003402	CFLAR	protein_coding	O15519	0.35211	0.118107	Other
ENSG00000003436	TFPI	protein_coding	P10646	-0.254877	0.48892	Other
ENSG00000003509	NDUFAF7	protein_coding	Q7L592	-0.411208	0.0795738	Other
ENSG00000003756	RBM5	protein_coding	P52756	0.260947	0.123328	Other
ENSG00000003987	MTMR7	protein_coding	Q9Y216	0.214167	0.67745	Other
ENSG00000003989	SLC7A2	protein_coding	P52569	-0.763349	7.02518e-06	Other
ENSG00000004059	ARF5	protein_coding	P84085	0.0918578	0.648828	Other
ENSG00000004139	SARM1	protein_coding	Q6SZW1	0.387241	0.138504	Stress-activated
ENSG00000004142	POLDIP2	protein_coding	Q9Y2S7	0.00767178	0.970776	Other
ENSG00000004399	PLXND1	protein_coding	Q9Y4D7	0.160609	0.726119	Other
ENSG00000004455	AK2	protein_coding	P54819	-0.234075	0.147824	Other
ENSG00000004468	CD38	protein_coding	P28907	3.22375	NA	Other
ENSG00000004478	FKBP4	protein_coding	Q02790	-0.737203	2.00759e-11	Other
ENSG00000004487	KDM1A	protein_coding	O60341	-0.300335	0.0492458	Other
ENSG00000004534	RBM6	protein_coding	P78332	0.123457	0.496687	Other
ENSG00000004660	CAMKK1	protein_coding	Q8N5S9	0.290702	0.217574	Other
ENSG00000004700	RECQL	protein_coding	P46063	0.104389	0.600672	Other
ENSG00000004766	VPS50	protein_coding	Q96JG6	-0.621165	0.00858845	Other
ENSG00000004776	HSPB6	protein_coding	O14558	0.82194	0.33817	Other
ENSG00000004777	ARHGAP33	protein_coding	O14559	0.457683	0.381083	Other
ENSG00000004779	NDUFAB1	protein_coding	O14561	0.00280407	0.994384	Other
ENSG00000004799	PDK4	protein_coding	Q16654	0.0254347	0.978615	Other
ENSG00000004809	SLC22A16	protein_coding	Q86VW1	-1.42838	NA	Other
ENSG00000004838	ZMYND10	protein_coding	O75800	1.33113	0.116078	Other
ENSG00000004846	ABCB5	protein_coding	Q2M3G0	1.22962	NA	Other
ENSG00000004848	ARX	protein_coding	Q96QS3	0.95982	NA	Other
ENSG00000004864	SLC25A13	protein_coding	Q9UJS0	-0.545175	2.60717e-06	Other
ENSG00000004866	ST7	protein_coding	Q9NRC1	0.271577	0.344621	Other
ENSG00000004897	CDC27	protein_coding	P30260	0.337871	0.358058	Other
ENSG00000004939	SLC4A1	protein_coding	P02730	2.27609	NA	Other
ENSG00000004948	CALCR	protein_coding	P30988	2.23031	NA	Other
ENSG00000004961	HCCS	protein_coding	P53701	-0.455476	0.00675383	Other
ENSG00000004975	DVL2	protein_coding	O14641	0.0563707	0.774183	Other
ENSG00000005001	PRSS22	protein_coding	Q9GZN4	NA	NA	Other
ENSG00000005007	UPF1	protein_coding	Q92900	-0.962111	5.00623e-13	Basal-specific
ENSG00000005020	SKAP2	protein_coding	O75563	-0.243913	0.23053	Other
ENSG00000005022	SLC25A5	protein_coding	P05141	-0.619303	0.0176537	Other
ENSG00000005059	MCUB	protein_coding	Q9NWR8	0.0639343	0.822419	Other
ENSG00000005073	HOXA11	protein_coding	P31270	0.224855	0.422649	Other
ENSG00000005075	POLR2J	protein_coding	P52435	-0.0742575	0.908916	Other
ENSG00000005100	DHX33	protein_coding	Q9H6R0	0.320832	0.0220049	Other
ENSG00000005102	MEOX1	protein_coding	P50221	-1.21802	0.318896	Other
ENSG00000005108	THSD7A	protein_coding	Q9UPZ6	-0.141053	0.917573	Other
ENSG00000005156	LIG3	protein_coding	P49916	0.00195726	0.993433	Other
ENSG00000005175	RPAP3	protein_coding	Q9H6T3	-0.578899	0.00106024	Other
ENSG00000005187	ACSM3	protein_coding	Q53FZ2	0.157427	0.87148	Other
ENSG00000005189	AC004381.6	protein_coding	#N/A	-0.0522642	0.869996	Other
ENSG00000005194	CIAPIN1	protein_coding	Q6FI81	-0.430829	0.00494082	Other
ENSG00000005206	SPPL2B	protein_coding	Q8TCT7	0.770651	0.00256383	Stress-activated
ENSG00000005238	FAM214B	protein_coding	Q7L5A3	1.03048	0.107736	Other
ENSG00000005243	COPZ2	protein_coding	Q9P299	1.64487	0.0511931	Other
ENSG00000005249	PRKAR2B	protein_coding	P31323	-0.617715	0.00250067	Other
ENSG00000005302	MSL3	protein_coding	Q8N5Y2	-0.407454	0.088496	Other
ENSG00000005339	CREBBP	protein_coding	Q92793	-0.21789	0.18875	Other
ENSG00000005379	TSPOAP1	protein_coding	O95153	1.58639	NA	Other
ENSG00000005381	MPO	protein_coding	P05164	NA	NA	Other
ENSG00000005421	PON1	protein_coding	P27169	NA	NA	Other
ENSG00000005436	GCFC2	protein_coding	P16383	-0.142109	0.554847	Other
ENSG00000005448	WDR54	protein_coding	Q9H977	0.240239	0.240396	Other
ENSG00000005469	CROT	protein_coding	Q9UKG9	-0.720444	0.00858999	Other
ENSG00000005471	ABCB4	protein_coding	P21439	0.234182	0.786138	Other
ENSG00000005483	KMT2E	protein_coding	Q8IZD2	0.109254	0.654668	Other
ENSG00000005486	RHBDD2	protein_coding	Q6NTF9	0.667583	0.00231594	Other
ENSG00000005513	SOX8	protein_coding	P57073	0.330826	0.630419	Other
ENSG00000005700	IBTK	protein_coding	Q9P2D0	2.14301	NA	Other
ENSG00000005801	ZNF195	protein_coding	O14628	0.131477	0.506247	Other
ENSG00000005810	MYCBP2	protein_coding	O75592	-0.104858	0.691991	Other
ENSG00000005812	FBXL3	protein_coding	Q9UKT7	-0.467849	0.0438365	Other
ENSG00000005844	ITGAL	protein_coding	P20701	0.199142	NA	Other
ENSG00000005882	PDK2	protein_coding	Q15119	-0.374894	0.179592	Other
ENSG00000005884	ITGA3	protein_coding	P26006	-0.0334397	0.930452	Other
ENSG00000005889	ZFX	protein_coding	P17010	-0.186886	0.342694	Other
ENSG00000005893	LAMP2	protein_coding	P13473	-0.154624	0.650674	Other
ENSG00000005961	ITGA2B	protein_coding	P08514	-0.0662767	0.920731	Other
ENSG00000005981	ASB4	protein_coding	Q9Y574	NA	NA	Other
ENSG00000006007	GDE1	protein_coding	Q9NZC3	-0.1132	0.633537	Other
ENSG00000006015	C19orf60	protein_coding	#N/A	0.804426	0.00481945	Other
ENSG00000006016	CRLF1	protein_coding	O75462	0.099853	0.933171	Other
ENSG00000006025	OSBPL7	protein_coding	Q9BZF2	1.09374	0.0145821	Other
ENSG00000006042	TMEM98	protein_coding	Q9Y2Y6	-0.451708	0.012376	Other
ENSG00000006047	YBX2	protein_coding	Q9Y2T7	0.200753	0.882906	Other
ENSG00000006059	KRT33A	protein_coding	O76009	NA	NA	Other
ENSG00000006062	MAP3K14	protein_coding	Q99558	0.0536874	0.890265	Other
ENSG00000006071	ABCC8	protein_coding	Q09428	0.479652	0.486894	Other
ENSG00000006116	CACNG3	protein_coding	O60359	NA	NA	Other
ENSG00000006118	TMEM132A	protein_coding	Q24JP5	-0.290142	0.146093	Basal-specific
ENSG00000006125	AP2B1	protein_coding	P63010	-0.494283	0.00107382	Other
ENSG00000006128	TAC1	protein_coding	P20366	0.95485	0.0779529	Other
ENSG00000006194	ZNF263	protein_coding	O14978	0.474144	0.0357673	Other
ENSG00000006210	CX3CL1	protein_coding	P78423	-0.18436	NA	Other
ENSG00000006282	SPATA20	protein_coding	Q8TB22	0.620033	0.0111314	Stress-activated
ENSG00000006283	CACNA1G	protein_coding	O43497	-0.289493	0.790575	Other
ENSG00000006327	TNFRSF12A	protein_coding	Q9NP84	0.498676	0.0274261	Other
ENSG00000006377	DLX6	protein_coding	P56179	-0.269295	0.609418	Other
ENSG00000006432	MAP3K9	protein_coding	P80192	0.648	0.00547926	Other
ENSG00000006451	RALA	protein_coding	P11233	-0.206768	0.376976	Other
ENSG00000006453	BAIAP2L1	protein_coding	Q9UHR4	-0.514238	0.0197217	Other
ENSG00000006459	KDM7A	protein_coding	Q6ZMT4	0.21824	0.216479	Other
ENSG00000006468	ETV1	protein_coding	P50549	-1.27262	0.0601094	Other
ENSG00000006530	AGK	protein_coding	Q53H12	-0.815883	1.2952e-06	Other
ENSG00000006534	ALDH3B1	protein_coding	P43353	1.13113	0.138251	Other
ENSG00000006555	TTC22	protein_coding	#N/A	-0.166836	NA	Other
ENSG00000006576	PHTF2	protein_coding	Q8N3S3	-0.280454	0.236036	Other
ENSG00000006606	CCL26	protein_coding	Q9Y258	0.844612	NA	Other
ENSG00000006607	FARP2	protein_coding	O94887	-0.429097	0.00354144	Other
ENSG00000006611	USH1C	protein_coding	Q9Y6N9	-0.305812	0.621222	Other
ENSG00000006625	GGCT	protein_coding	O75223	-0.189131	0.30551	Other
ENSG00000006634	DBF4	protein_coding	Q9UBU7	-0.312338	0.15391	Other
ENSG00000006638	TBXA2R	protein_coding	P21731	0.672976	0.541282	Other
ENSG00000006652	IFRD1	protein_coding	O00458	1.08768	9.46431e-17	Other
ENSG00000006659	LGALS14	protein_coding	Q8TCE9	NA	NA	Other
ENSG00000006695	COX10	protein_coding	Q12887	0.372342	0.192863	Other
ENSG00000006704	GTF2IRD1	protein_coding	Q9UHL9	0.0364206	0.899144	Other
ENSG00000006712	PAF1	protein_coding	Q8N7H5	-0.465004	0.0154585	Other
ENSG00000006715	VPS41	protein_coding	P49754	-0.435314	0.013483	Other
ENSG00000006740	ARHGAP44	protein_coding	Q17R89	0.476083	0.258314	Other
ENSG00000006744	ELAC2	protein_coding	Q9BQ52	-0.122025	0.549024	Other
ENSG00000006747	SCIN	protein_coding	Q9Y6U3	-0.442575	0.642924	Other
ENSG00000006756	ARSD	protein_coding	P51689	-0.117016	NA	Other
ENSG00000006757	PNPLA4	protein_coding	P41247	0.372981	0.460656	Other
ENSG00000006788	MYH13	protein_coding	Q9UKX3	-0.166836	NA	Other
ENSG00000006831	ADIPOR2	protein_coding	Q86V24	0.105276	0.632039	Other
ENSG00000006837	CDKL3	protein_coding	Q8IVW4	-0.171329	0.877339	Other
ENSG00000007001	UPP2	protein_coding	O95045	NA	NA	Other
ENSG00000007038	PRSS21	protein_coding	Q9Y6M0	1.78893	NA	Other
ENSG00000007047	MARK4	protein_coding	Q96L34	0.00219658	0.996034	Other
ENSG00000007062	PROM1	protein_coding	O43490	2.68876	NA	Other
ENSG00000007080	CCDC124	protein_coding	Q96CT7	-0.113259	0.617995	Other
ENSG00000007129	CEACAM21	protein_coding	Q3KPI0	NA	NA	Other
ENSG00000007168	PAFAH1B1	protein_coding	P43034	-0.510231	7.76252e-05	Other
ENSG00000007171	NOS2	protein_coding	P35228	-0.300613	0.719444	Other
ENSG00000007174	DNAH9	protein_coding	Q9NYC9	-1.11609	NA	Other
ENSG00000007202	KIAA0100	protein_coding	Q14667	-0.00776758	0.985774	Other
ENSG00000007216	SLC13A2	protein_coding	Q13183	-1.76706	NA	Other
ENSG00000007237	GAS7	protein_coding	O60861	0.116435	0.87802	Other
ENSG00000007255	TRAPPC6A	protein_coding	O75865	0.564348	0.0412569	Other
ENSG00000007264	MATK	protein_coding	P42679	0.0123144	0.97675	Other
ENSG00000007306	CEACAM7	protein_coding	Q14002	NA	NA	Other
ENSG00000007312	CD79B	protein_coding	P40259	-2.0257	NA	Other
ENSG00000007314	SCN4A	protein_coding	P35499	1.21054	0.0666218	Other
ENSG00000007341	ST7L	protein_coding	Q8TDW4	0.0441597	0.87806	Other
ENSG00000007350	TKTL1	protein_coding	P51854	-0.432433	NA	Other
ENSG00000007372	PAX6	protein_coding	P26367	0.169654	0.454769	Other
ENSG00000007376	RPUSD1	protein_coding	Q9UJJ7	-0.0563019	0.794964	Other
ENSG00000007384	RHBDF1	protein_coding	Q96CC6	1.0117	0.000233904	Other
ENSG00000007392	LUC7L	protein_coding	Q9NQ29	-0.537263	0.000397192	Other
ENSG00000007402	CACNA2D2	protein_coding	Q9NY47	-1.00498	3.65524e-10	Basal-specific
ENSG00000007516	BAIAP3	protein_coding	O94812	0.495586	0.450602	Other
ENSG00000007520	TSR3	protein_coding	Q9UJK0	0.117964	0.644838	Other
ENSG00000007541	PIGQ	protein_coding	Q9BRB3	0.288087	0.320097	Other
ENSG00000007545	CRAMP1	protein_coding	Q96RY5	0.579101	0.0733887	Other
ENSG00000007866	TEAD3	protein_coding	Q99594	-0.0804996	0.859858	Other
ENSG00000007908	SELE	protein_coding	P16581	2.76138	NA	Other
ENSG00000007923	DNAJC11	protein_coding	Q9NVH1	-0.26661	0.0863351	Other
ENSG00000007933	FMO3	protein_coding	P31513	-1.51705	NA	Other
ENSG00000007944	MYLIP	protein_coding	Q8WY64	-0.0552355	0.902036	Other
ENSG00000007952	NOX1	protein_coding	Q9Y5S8	1.2112	NA	Other
ENSG00000007968	E2F2	protein_coding	Q14209	1.78893	NA	Other
ENSG00000008018	PSMB1	protein_coding	P20618	-0.256887	0.17283	Other
ENSG00000008056	SYN1	protein_coding	P17600	-0.00350736	0.996178	Other
ENSG00000008083	JARID2	protein_coding	Q92833	-0.345919	0.101022	Other
ENSG00000008086	CDKL5	protein_coding	O76039	0.290882	0.576471	Other
ENSG00000008118	CAMK1G	protein_coding	Q96NX5	-0.173015	NA	Other
ENSG00000008128	CDK11A	protein_coding	Q9UQ88	1.33613	0.140618	Other
ENSG00000008130	NADK	protein_coding	O95544	0.480042	0.0142309	Other
ENSG00000008196	TFAP2B	protein_coding	Q92481	-0.166836	NA	Other
ENSG00000008197	TFAP2D	protein_coding	Q7Z6R9	NA	NA	Other
ENSG00000008226	DLEC1	protein_coding	Q9Y238	0.794328	0.489625	Other
ENSG00000008256	CYTH3	protein_coding	O43739	0.266924	0.348848	Other
ENSG00000008277	ADAM22	protein_coding	Q9P0K1	-0.544077	0.0402133	Other
ENSG00000008282	SYPL1	protein_coding	Q16563	-0.481547	0.0321404	Other
ENSG00000008283	CYB561	protein_coding	P49447	1.35958	1.98136e-10	Other
ENSG00000008294	SPAG9	protein_coding	O60271	-0.0887205	0.739757	Other
ENSG00000008300	CELSR3	protein_coding	Q9NYQ7	1.04989	6.23405e-10	Stress-activated
ENSG00000008311	AASS	protein_coding	Q9UDR5	-0.243118	0.253934	Other
ENSG00000008323	PLEKHG6	protein_coding	Q3KR16	2.89455	NA	Other
ENSG00000008324	SS18L2	protein_coding	Q9UHA2	0.169581	0.482694	Other
ENSG00000008382	MPND	protein_coding	Q8N594	0.211044	0.610339	Other
ENSG00000008394	MGST1	protein_coding	P10620	-0.5016	0.000410849	Other
ENSG00000008405	CRY1	protein_coding	Q16526	0.115278	0.627437	Other
ENSG00000008438	PGLYRP1	protein_coding	O75594	1.83754	NA	Other
ENSG00000008441	NFIX	protein_coding	Q14938	-0.16444	0.671826	Other
ENSG00000008513	ST3GAL1	protein_coding	Q11201	0.450041	0.38619	Other
ENSG00000008516	MMP25	protein_coding	Q9NPA2	-0.26267	NA	Other
ENSG00000008517	IL32	protein_coding	P24001	0.757451	0.430748	Other
ENSG00000008710	PKD1	protein_coding	P98161	0.718277	0.000896928	Other
ENSG00000008735	MAPK8IP2	protein_coding	Q13387	-0.101896	0.739497	Other
ENSG00000008838	MED24	protein_coding	O75448	-0.354882	0.0100379	Stress-activated
ENSG00000008853	RHOBTB2	protein_coding	Q9BYZ6	-0.118576	0.81519	Other
ENSG00000008869	HEATR5B	protein_coding	Q9P2D3	-0.371357	0.00844051	Other
ENSG00000008952	SEC62	protein_coding	Q99442	-0.558271	0.0589323	Other
ENSG00000008988	RPS20	protein_coding	P60866	0.264369	0.198313	Other
ENSG00000009307	CSDE1	protein_coding	O75534	-0.431125	0.000159153	Other
ENSG00000009335	UBE3C	protein_coding	Q15386	-0.010009	0.970539	Other
ENSG00000009413	REV3L	protein_coding	O60673	0.165938	0.579233	Other
ENSG00000009694	TENM1	protein_coding	Q9UKZ4	0.306257	0.519026	Other
ENSG00000009709	PAX7	protein_coding	P23759	0.226548	NA	Other
ENSG00000009724	MASP2	protein_coding	O00187	0.986785	0.138251	Other
ENSG00000009765	IYD	protein_coding	Q6PHW0	NA	NA	Other
ENSG00000009780	FAM76A	protein_coding	Q8TAV0	-0.334784	0.168957	Other
ENSG00000009790	TRAF3IP3	protein_coding	Q9Y228	0.386507	NA	Other
ENSG00000009830	POMT2	protein_coding	Q9UKY4	0.340352	0.110494	Other
ENSG00000009844	VTA1	protein_coding	Q9NP79	-0.311071	0.0576023	Other
ENSG00000009950	MLXIPL	protein_coding	Q9NP71	-0.00706566	0.991968	Other
ENSG00000009954	BAZ1B	protein_coding	Q9UIG0	-0.385401	0.0018712	Other
ENSG00000010017	RANBP9	protein_coding	Q96S59	-0.0823169	0.734662	Other
ENSG00000010030	ETV7	protein_coding	Q9Y603	2.28646	NA	Other
ENSG00000010072	SPRTN	protein_coding	Q9H040	-0.0928049	0.677945	Other
ENSG00000010165	METTL13	protein_coding	Q8N6R0	-0.290492	0.085844	Other
ENSG00000010219	DYRK4	protein_coding	Q9NR20	0.430292	0.245409	Other
ENSG00000010244	ZNF207	protein_coding	O43670	-0.136989	0.649723	Other
ENSG00000010256	UQCRC1	protein_coding	P31930	-0.443447	0.00465413	Other
ENSG00000010270	STARD3NL	protein_coding	O95772	-0.0548025	0.818119	Other
ENSG00000010278	CD9	protein_coding	P21926	-0.499493	0.00105097	Other
ENSG00000010282	HHATL	protein_coding	Q9HCP6	0.0106022	NA	Other
ENSG00000010292	NCAPD2	protein_coding	Q15021	-0.551628	5.81248e-06	Basal-specific
ENSG00000010295	IFFO1	protein_coding	Q0D2I5	0.394819	0.017921	Stress-activated
ENSG00000010310	GIPR	protein_coding	P48546	0.427337	0.593669	Other
ENSG00000010318	PHF7	protein_coding	Q9BWX1	0.366556	0.414376	Other
ENSG00000010319	SEMA3G	protein_coding	Q9NS98	-0.25361	0.647068	Other
ENSG00000010322	NISCH	protein_coding	Q9Y2I1	0.477551	0.000481628	Other
ENSG00000010327	STAB1	protein_coding	Q9NY15	0.188509	NA	Other
ENSG00000010361	FUZ	protein_coding	Q9BT04	0.421572	0.0218816	Other
ENSG00000010379	SLC6A13	protein_coding	Q9NSD5	1.94186	0.000101189	Other
ENSG00000010404	IDS	protein_coding	P22304	1.11556	8.58476e-05	Other
ENSG00000010438	PRSS3	protein_coding	P35030	NA	NA	Other
ENSG00000010539	ZNF200	protein_coding	P98182	-0.0395839	0.87806	Other
ENSG00000010610	CD4	protein_coding	P01730	0.835657	NA	Other
ENSG00000010626	LRRC23	protein_coding	Q53EV4	0.325463	0.53587	Other
ENSG00000010671	BTK	protein_coding	Q06187	1.33061	0.110396	Other
ENSG00000010704	HFE	protein_coding	Q30201	2.82774	NA	Other
ENSG00000010803	SCMH1	protein_coding	Q96GD3	0.484548	0.0279265	Other
ENSG00000010810	FYN	protein_coding	P06241	-0.307764	0.0269806	Other
ENSG00000010818	HIVEP2	protein_coding	P31629	0.102825	0.733474	Other
ENSG00000010932	FMO1	protein_coding	Q01740	-0.166836	NA	Other
ENSG00000011007	TCEB3	protein_coding	#N/A	-0.264554	0.186389	Other
ENSG00000011009	LYPLA2	protein_coding	O95372	-0.024424	0.945485	Other
ENSG00000011021	CLCN6	protein_coding	P51797	0.502313	0.00875683	Other
ENSG00000011028	MRC2	protein_coding	Q9UBG0	0.508624	0.0107674	Other
ENSG00000011052	NME1-NME2	protein_coding	#N/A	NA	NA	Other
ENSG00000011083	SLC6A7	protein_coding	Q99884	NA	NA	Other
ENSG00000011105	TSPAN9	protein_coding	O75954	-0.623183	0.0221998	Other
ENSG00000011114	BTBD7	protein_coding	Q9P203	-1.95171	NA	Other
ENSG00000011132	APBA3	protein_coding	O96018	0.438561	0.109783	Other
ENSG00000011143	MKS1	protein_coding	Q9NXB0	-0.155819	0.613728	Other
ENSG00000011198	ABHD5	protein_coding	Q8WTS1	-0.473948	0.0131076	Other
ENSG00000011201	ANOS1	protein_coding	P23352	0.250286	NA	Other
ENSG00000011243	AKAP8L	protein_coding	Q9ULX6	0.0830204	0.717478	Other
ENSG00000011258	MBTD1	protein_coding	Q05BQ5	0.190802	0.461294	Other
ENSG00000011260	UTP18	protein_coding	Q9Y5J1	-0.184114	0.312317	Other
ENSG00000011275	RNF216	protein_coding	Q9NWF9	-0.158575	0.340913	Other
ENSG00000011295	TTC19	protein_coding	Q6DKK2	0.393561	0.0182656	Other
ENSG00000011304	PTBP1	protein_coding	P26599	-0.198144	0.347425	Other
ENSG00000011332	DPF1	protein_coding	Q92782	0.0457497	0.888375	Other
ENSG00000011347	SYT7	protein_coding	O43581	-0.653916	0.243214	Other
ENSG00000011376	LARS2	protein_coding	Q15031	-0.925172	4.96812e-10	Other
ENSG00000011405	PIK3C2A	protein_coding	O00443	-0.0644664	0.73816	Other
ENSG00000011422	PLAUR	protein_coding	Q03405	0.0341754	0.933647	Other
ENSG00000011426	ANLN	protein_coding	Q9NQW6	-0.639331	1.2053e-05	Other
ENSG00000011451	WIZ	protein_coding	O95785	0.0907023	0.693967	Other
ENSG00000011454	RABGAP1	protein_coding	Q9Y3P9	-0.281106	0.0902047	Other
ENSG00000011465	DCN	protein_coding	P07585	-0.365271	NA	Other
ENSG00000011478	QPCTL	protein_coding	Q9NXS2	0.37432	0.0601614	Other
ENSG00000011485	PPP5C	protein_coding	P53041	-0.0283461	0.890647	Stress-activated
ENSG00000011523	CEP68	protein_coding	Q76N32	0.015205	0.963219	Other
ENSG00000011566	MAP4K3	protein_coding	Q8IVH8	0.124229	0.672657	Other
ENSG00000011590	ZBTB32	protein_coding	Q9Y2Y4	1.28049	NA	Other
ENSG00000011600	TYROBP	protein_coding	O43914	NA	NA	Other
ENSG00000011638	TMEM159	protein_coding	Q96B96	-0.304157	0.467034	Other
ENSG00000011677	GABRA3	protein_coding	P34903	NA	NA	Other
ENSG00000012048	BRCA1	protein_coding	P38398	-0.219929	0.146417	Other
ENSG00000012061	ERCC1	protein_coding	P07992	0.218	0.477356	Other
ENSG00000012124	CD22	protein_coding	P20273	-1.92218	NA	Other
ENSG00000012171	SEMA3B	protein_coding	Q13214	1.07543	0.00461072	Other
ENSG00000012174	MBTPS2	protein_coding	O43462	0.122536	0.63334	Other
ENSG00000012211	PRICKLE3	protein_coding	O43900	-0.327956	0.332992	Other
ENSG00000012223	LTF	protein_coding	P02788	-1.28816	NA	Other
ENSG00000012232	EXTL3	protein_coding	O43909	0.507912	0.0118067	Other
ENSG00000012504	NR1H4	protein_coding	Q96RI1	NA	NA	Other
ENSG00000012660	ELOVL5	protein_coding	Q9NYP7	-0.187674	0.2824	Other
ENSG00000012779	ALOX5	protein_coding	P09917	NA	NA	Other
ENSG00000012817	KDM5D	protein_coding	Q9BY66	0.0187992	0.986903	Other
ENSG00000012822	CALCOCO1	protein_coding	Q9P1Z2	-0.0226743	0.948035	Other
ENSG00000012963	UBR7	protein_coding	Q8N806	-0.89953	NA	Other
ENSG00000012983	MAP4K5	protein_coding	Q9Y4K4	-0.00139324	0.997219	Other
ENSG00000013016	EHD3	protein_coding	Q9NZN3	0.0901308	0.87855	Other
ENSG00000013275	PSMC4	protein_coding	P43686	0.397387	0.628362	Other
ENSG00000013288	MAN2B2	protein_coding	Q9Y2E5	0.379733	0.105876	Stress-activated
ENSG00000013293	SLC7A14	protein_coding	Q8TBB6	NA	NA	Other
ENSG00000013297	CLDN11	protein_coding	O75508	-2.87517	NA	Other
ENSG00000013306	SLC25A39	protein_coding	Q9BZJ4	0.36034	0.0213593	Other
ENSG00000013364	MVP	protein_coding	Q14764	0.145297	0.813276	Other
ENSG00000013374	NUB1	protein_coding	Q9Y5A7	-0.480259	0.000115574	Other
ENSG00000013375	PGM3	protein_coding	O95394	1.10387	4.82085e-18	Other
ENSG00000013392	RWDD2A	protein_coding	#N/A	0.455714	0.164646	Other
ENSG00000013441	CLK1	protein_coding	P49759	0.193162	0.284279	Other
ENSG00000013503	POLR3B	protein_coding	Q9NW08	-0.459456	0.0255278	Other
ENSG00000013523	ANGEL1	protein_coding	Q9UNK9	0.0371054	0.875789	Other
ENSG00000013561	RNF14	protein_coding	Q9UBS8	-0.353917	0.0374322	Other
ENSG00000013563	DNASE1L1	protein_coding	P49184	0.470683	0.205347	Other
ENSG00000013573	DDX11	protein_coding	Q96FC9	0.526572	0.00045484	Stress-activated
ENSG00000013583	HEBP1	protein_coding	Q9NRV9	-0.141062	0.412874	Other
ENSG00000013588	GPRC5A	protein_coding	Q8NFJ5	-0.576728	0.181711	Other
ENSG00000013619	MAMLD1	protein_coding	Q13495	0.0495696	0.949863	Other
ENSG00000013725	CD6	protein_coding	P30203	NA	NA	Other
ENSG00000013810	TACC3	protein_coding	Q9Y6A5	-0.303737	0.0325402	Other
ENSG00000014123	UFL1	protein_coding	O94874	0.410227	0.00451958	Other
ENSG00000014138	POLA2	protein_coding	Q14181	0.129664	0.585244	Other
ENSG00000014164	ZC3H3	protein_coding	Q8IXZ2	0.18938	0.686685	Other
ENSG00000014216	CAPN1	protein_coding	P07384	-0.229009	0.262898	Other
ENSG00000014257	ACPP	protein_coding	P15309	-2.16878	NA	Other
ENSG00000014641	MDH1	protein_coding	P40925	-0.241256	0.308873	Other
ENSG00000014824	SLC30A9	protein_coding	Q6PML9	0.002838	0.992671	Other
ENSG00000014914	MTMR11	protein_coding	A4FU01	1.11527	0.041088	Other
ENSG00000014919	COX15	protein_coding	Q7KZN9	-0.225809	0.1909	Other
ENSG00000015133	CCDC88C	protein_coding	Q9P219	-0.0324882	0.914387	Other
ENSG00000015153	YAF2	protein_coding	Q8IY57	-0.264955	0.300479	Other
ENSG00000015171	ZMYND11	protein_coding	Q15326	-0.00790966	0.981846	Other
ENSG00000015285	WAS	protein_coding	P42768	0.215516	0.747813	Other
ENSG00000015413	DPEP1	protein_coding	P16444	0.387396	0.759654	Other
ENSG00000015475	BID	protein_coding	P55957	-0.319238	0.192624	Other
ENSG00000015479	MATR3.2	protein_coding	#N/A	0.403154	0.637502	Other
ENSG00000015520	NPC1L1	protein_coding	Q9UHC9	0.820573	0.135079	Other
ENSG00000015532	XYLT2	protein_coding	Q9H1B5	0.0654673	0.821374	Other
ENSG00000015568	RGPD5	protein_coding	Q99666	0.539993	0.341042	Other
ENSG00000015592	STMN4	protein_coding	Q9H169	2.2865	NA	Other
ENSG00000015676	NUDCD3	protein_coding	Q8IVD9	-0.574457	0.0676868	Other
ENSG00000016082	ISL1	protein_coding	P61371	-0.296662	0.173853	Other
ENSG00000016391	CHDH	protein_coding	Q8NE62	0.405437	0.162504	Other
ENSG00000016402	IL20RA	protein_coding	Q9UHF4	NA	NA	Other
ENSG00000016490	CLCA1	protein_coding	A8K7I4	NA	NA	Other
ENSG00000016602	CLCA4	protein_coding	Q14CN2	NA	NA	Other
ENSG00000016864	GLT8D1	protein_coding	Q68CQ7	0.20709	0.266445	Other
ENSG00000017260	ATP2C1	protein_coding	P98194	-1.09438	1.7332e-05	Other
ENSG00000017427	IGF1	protein_coding	P05019	NA	NA	Other
ENSG00000017483	SLC38A5	protein_coding	Q8WUX1	1.01553	NA	Other
ENSG00000017797	RALBP1	protein_coding	Q15311	-0.52862	0.00895395	Other
ENSG00000018189	RUFY3	protein_coding	Q7L099	-0.102077	0.651724	Other
ENSG00000018236	CNTN1	protein_coding	Q12860	-0.873759	0.00028822	Other
ENSG00000018280	SLC11A1	protein_coding	P49279	-0.39556	NA	Other
ENSG00000018408	WWTR1	protein_coding	Q9GZV5	-0.45198	0.0247612	Other
ENSG00000018510	AGPS	protein_coding	O00116	-0.656219	3.93618e-06	Other
ENSG00000018607	ZNF806	unprocessed_pseudogene	P0C7X5	0.736514	NA	Other
ENSG00000018610	CXorf56	protein_coding	Q9H5V9	-0.199896	0.257166	Other
ENSG00000018625	ATP1A2	protein_coding	P50993	-0.848598	NA	Other
ENSG00000018699	TTC27	protein_coding	Q6P3X3	-0.644178	1.71807e-05	Other
ENSG00000018869	ZNF582	protein_coding	Q96NG8	-0.196622	0.565058	Other
ENSG00000019102	VSIG2	protein_coding	Q96IQ7	0.203835	NA	Other
ENSG00000019144	PHLDB1	protein_coding	Q86UU1	-0.0805893	0.794964	Other
ENSG00000019169	MARCO	protein_coding	Q9UEW3	2.29443	NA	Other
ENSG00000019186	CYP24A1	protein_coding	Q07973	NA	NA	Other
ENSG00000019485	PRDM11	protein_coding	Q9NQV5	0.543139	0.34064	Other
ENSG00000019505	SYT13	protein_coding	Q7L8C5	-0.177857	NA	Other
ENSG00000019549	SNAI2	protein_coding	O43623	-0.056859	0.902029	Other
ENSG00000019582	CD74	protein_coding	P04233	-0.215543	NA	Other
ENSG00000019991	HGF	protein_coding	P14210	0.699633	NA	Other
ENSG00000019995	ZRANB1	protein_coding	Q9UGI0	-0.399676	0.00606116	Other
ENSG00000020129	NCDN	protein_coding	Q9UBB6	-0.34837	0.0483848	Other
ENSG00000020181	ADGRA2	protein_coding	Q96PE1	0.70467	0.031856	Other
ENSG00000020219	CCT8L1P	processed_pseudogene	A6NM43	1.13018	NA	Other
ENSG00000020256	ZFP64	protein_coding	Q9NPA5	-0.134934	0.66017	Other
ENSG00000020426	MNAT1	protein_coding	P51948	-0.513964	0.0846883	Other
ENSG00000020577	SAMD4A	protein_coding	Q9UPU9	0.416735	0.187262	Other
ENSG00000020633	RUNX3	protein_coding	Q13761	0.816851	0.122527	Other
ENSG00000020922	MRE11	protein_coding	P49959	-0.461574	0.0206161	Other
ENSG00000021300	PLEKHB1	protein_coding	Q9UF11	0.0146369	0.961153	Other
ENSG00000021355	SERPINB1	protein_coding	P30740	-0.0847459	0.717762	Other
ENSG00000021461	CYP3A43	protein_coding	Q9HB55	-1.76706	NA	Other
ENSG00000021488	SLC7A9	protein_coding	P82251	0.100906	NA	Other
ENSG00000021574	SPAST	protein_coding	Q9UBP0	-0.170607	0.488146	Other
ENSG00000021645	NRXN3	protein_coding	Q9Y4C0	-0.858744	0.000600498	Other
ENSG00000021762	OSBPL5	protein_coding	Q9H0X9	-0.0666497	0.877242	Other
ENSG00000021776	AQR	protein_coding	O60306	-0.663608	5.30081e-07	Other
ENSG00000021826	CPS1	protein_coding	P31327	-0.177902	0.490577	Other
ENSG00000021852	C8B	protein_coding	P07358	NA	NA	Other
ENSG00000022267	FHL1	protein_coding	Q13642	0.059017	0.715986	Other
ENSG00000022277	RTFDC1	protein_coding	Q9BY42	-0.390837	0.00460156	Other
ENSG00000022355	GABRA1	protein_coding	P14867	-0.166836	NA	Other
ENSG00000022556	NLRP2	protein_coding	Q9NX02	NA	NA	Other
ENSG00000022567	SLC45A4	protein_coding	Q5BKX6	0.522156	0.0359829	Other
ENSG00000022840	RNF10	protein_coding	Q8N5U6	0.498796	0.0113091	Other
ENSG00000022976	ZNF839	protein_coding	A8K0R7	0.06301	0.851434	Other
ENSG00000023041	ZDHHC6	protein_coding	Q9H6R6	0.0494138	0.87855	Other
ENSG00000023171	GRAMD1B	protein_coding	Q3KR37	-0.236287	0.560627	Other
ENSG00000023191	RNH1	protein_coding	P13489	-0.816892	0.775202	Other
ENSG00000023228	NDUFS1	protein_coding	P28331	0.244496	0.800469	Other
ENSG00000023287	RB1CC1	protein_coding	Q8TDY2	-0.0676859	0.856618	Other
ENSG00000023318	ERP44	protein_coding	Q9BS26	0.522202	0.00827197	Common
ENSG00000023330	ALAS1	protein_coding	P13196	-0.123289	0.548025	Other
ENSG00000023445	BIRC3	protein_coding	Q13489	0.278886	NA	Other
ENSG00000023516	AKAP11	protein_coding	Q9UKA4	-0.306079	0.0598931	Other
ENSG00000023572	GLRX2	protein_coding	Q9NS18	-0.10754	0.710576	Other
ENSG00000023608	SNAPC1	protein_coding	Q16533	-0.813899	0.00146117	Other
ENSG00000023697	DERA	protein_coding	Q9Y315	-0.0789437	0.715986	Other
ENSG00000023734	STRAP	protein_coding	Q9Y3F4	-0.186687	0.385623	Other
ENSG00000023839	ABCC2	protein_coding	Q92887	-0.313463	0.757905	Other
ENSG00000023892	DEF6	protein_coding	Q9H4E7	-0.342369	0.558888	Other
ENSG00000023902	PLEKHO1	protein_coding	Q53GL0	-0.266091	0.281074	Other
ENSG00000023909	GCLM	protein_coding	P48507	0.00541285	0.991184	Other
ENSG00000024048	UBR2	protein_coding	Q8IWV8	-0.345993	0.0198213	Other
ENSG00000024422	EHD2	protein_coding	Q9NZN4	-0.232672	0.642824	Other
ENSG00000024526	DEPDC1	protein_coding	Q5TB30	-0.234328	0.16974	Other
ENSG00000024862	CCDC28A	protein_coding	Q8IWP9	0.0392044	0.888503	Other
ENSG00000025039	RRAGD	protein_coding	Q9NQL2	0.10788	0.758207	Other
ENSG00000025156	HSF2	protein_coding	Q03933	-0.155045	0.512705	Other
ENSG00000025293	PHF20	protein_coding	Q9BVI0	-0.280062	0.165124	Other
ENSG00000025423	HSD17B6	protein_coding	O14756	0.153039	0.623359	Other
ENSG00000025434	NR1H3	protein_coding	Q13133	0.218665	0.547917	Other
ENSG00000025708	TYMP	protein_coding	P19971	0.888796	0.274692	Other
ENSG00000025770	NCAPH2	protein_coding	Q6IBW4	0.0177518	0.937796	Other
ENSG00000025772	TOMM34	protein_coding	Q15785	-0.686857	2.3142e-10	Other
ENSG00000025796	SEC63	protein_coding	Q9UGP8	0.351054	0.0464821	Other
ENSG00000025800	KPNA6	protein_coding	O60684	-0.312589	0.0891013	Other
ENSG00000026025	VIM	protein_coding	P08670	-1.12105	1.07832e-18	Other
ENSG00000026036	RTEL1-TNFRSF6B	protein_coding	F6WH68	1.20717	0.134117	Other
ENSG00000026103	FAS	protein_coding	P25445	-0.0258827	0.967175	Other
ENSG00000026297	RNASET2	protein_coding	O00584	-0.214553	0.509694	Other
ENSG00000026508	CD44	protein_coding	P16070	-1.31978	0.13735	Other
ENSG00000026559	KCNG1	protein_coding	Q9UIX4	0.191317	0.621273	Other
ENSG00000026652	AGPAT4	protein_coding	Q9NRZ5	0.0787732	0.742154	Other
ENSG00000026751	SLAMF7	protein_coding	Q9NQ25	0.0452146	NA	Other
ENSG00000026950	BTN3A1	protein_coding	O00481	0.069739	0.901621	Other
ENSG00000027001	MIPEP	protein_coding	Q99797	-0.430266	0.0202432	Other
ENSG00000027075	PRKCH	protein_coding	P24723	-0.425525	0.315922	Other
ENSG00000027644	INSRR	protein_coding	P14616	2.16409	NA	Other
ENSG00000027697	IFNGR1	protein_coding	P15260	-0.101654	0.560273	Other
ENSG00000027847	B4GALT7	protein_coding	Q9UBV7	0.818928	1.51046e-05	Stress-activated
ENSG00000027869	SH2D2A	protein_coding	Q9NP31	0.326654	0.566255	Other
ENSG00000028116	VRK2	protein_coding	Q86Y07	-0.425941	0.0241893	Other
ENSG00000028137	TNFRSF1B	protein_coding	P20333	-1.50519	NA	Other
ENSG00000028203	VEZT	protein_coding	Q9HBM0	-0.110004	0.643201	Other
ENSG00000028277	POU2F2	protein_coding	P09086	0.724002	0.246285	Other
ENSG00000028310	BRD9	protein_coding	Q9H8M2	-0.00868577	0.979062	Other
ENSG00000028528	SNX1	protein_coding	Q13596	-0.524776	0.000519746	Other
ENSG00000028839	TBPL1	protein_coding	P62380	0.256287	0.35794	Other
ENSG00000029153	ARNTL2	protein_coding	Q8WYA1	-0.106274	0.859773	Other
ENSG00000029363	BCLAF1	protein_coding	Q9NYF8	-0.390792	0.0277369	Other
ENSG00000029364	SLC39A9	protein_coding	Q9NUM3	0.371887	0.0195259	Stress-activated
ENSG00000029534	ANK1	protein_coding	P16157	0.159554	0.727086	Other
ENSG00000029559	IBSP	protein_coding	P21815	NA	NA	Other
ENSG00000029639	TFB1M	protein_coding	Q8WVM0	-0.359863	0.176175	Other
ENSG00000029725	RABEP1	protein_coding	Q15276	-0.438825	0.00839849	Other
ENSG00000029993	HMGB3	protein_coding	O15347	-0.586249	3.8007e-05	Other
ENSG00000030066	NUP160	protein_coding	Q12769	-0.594559	2.28009e-07	Other
ENSG00000030110	BAK1	protein_coding	Q16611	0.472169	0.0861727	Other
ENSG00000030304	MUSK	protein_coding	O15146	1.46021	NA	Other
ENSG00000030419	IKZF2	protein_coding	Q9UKS7	0.169676	0.75938	Other
ENSG00000030582	GRN	protein_coding	P28799	-0.222834	0.190262	Other
ENSG00000031003	FAM13B	protein_coding	Q9NYF5	-0.292821	0.422132	Other
ENSG00000031081	ARHGAP31	protein_coding	Q2M1Z3	-0.016012	0.979943	Other
ENSG00000031691	CENPQ	protein_coding	Q7L2Z9	0.00939999	0.977315	Other
ENSG00000031698	SARS	protein_coding	P49591	0.535141	2.9681e-05	Other
ENSG00000031823	RANBP3	protein_coding	Q9H6Z4	-0.0139171	0.958067	Other
ENSG00000032219	ARID4A	protein_coding	P29374	-0.294441	0.247122	Other
ENSG00000032389	TSSC1	protein_coding	#N/A	0.699943	0.000210455	Other
ENSG00000032444	PNPLA6	protein_coding	Q8IY17	0.193619	0.513448	Other
ENSG00000032742	IFT88	protein_coding	Q13099	-0.528025	0.0807654	Other
ENSG00000033011	ALG1	protein_coding	Q9BT22	-0.175727	0.638925	Other
ENSG00000033030	ZCCHC8	protein_coding	Q6NZY4	0.331615	0.0220047	Other
ENSG00000033050	ABCF2	protein_coding	Q9UG63	-0.464237	0.0241273	Other
ENSG00000033100	CHPF2	protein_coding	Q9P2E5	0.707839	2.03709e-06	Other
ENSG00000033122	LRRC7	protein_coding	Q96NW7	-0.895878	NA	Other
ENSG00000033170	FUT8	protein_coding	Q9BYC5	-0.560467	0.0142041	Other
ENSG00000033178	UBA6	protein_coding	A0AVT1	-0.17713	0.404071	Other
ENSG00000033327	GAB2	protein_coding	Q9UQC2	0.618845	0.0525393	Other
ENSG00000033627	ATP6V0A1	protein_coding	Q93050	-0.0404835	0.823355	Other
ENSG00000033800	PIAS1	protein_coding	O75925	-0.371185	0.0617809	Other
ENSG00000033867	SLC4A7	protein_coding	Q9Y6M7	-0.290158	0.127347	Other
ENSG00000034053	APBA2	protein_coding	Q99767	-0.605833	NA	Other
ENSG00000034152	MAP2K3	protein_coding	P46734	-0.938972	1.84249e-05	Other
ENSG00000034239	EFCAB1	protein_coding	Q9HAE3	1.74079	NA	Other
ENSG00000034510	TMSB10	protein_coding	P63313	-0.379669	0.0287999	Other
ENSG00000034533	ASTE1	protein_coding	Q2TB18	-0.102749	0.777189	Other
ENSG00000034677	RNF19A	protein_coding	Q9NV58	-0.0328253	0.925092	Other
ENSG00000034693	PEX3	protein_coding	P56589	-0.142131	0.60268	Other
ENSG00000034713	GABARAPL2	protein_coding	P60520	0.0139604	0.948035	Other
ENSG00000034971	MYOC	protein_coding	Q99972	NA	NA	Other
ENSG00000035115	SH3YL1	protein_coding	Q96HL8	0.476904	0.243362	Other
ENSG00000035141	FAM136A	protein_coding	Q96C01	-0.183458	0.473332	Other
ENSG00000035403	VCL	protein_coding	P18206	-0.66238	2.30566e-08	Other
ENSG00000035499	DEPDC1B	protein_coding	Q8WUY9	-0.337019	0.0493325	Other
ENSG00000035664	DAPK2	protein_coding	Q9UIK4	-0.218405	0.853239	Other
ENSG00000035681	NSMAF	protein_coding	Q92636	-0.500869	0.0554574	Other
ENSG00000035687	ADSS	protein_coding	P30520	-0.592254	8.23503e-07	Other
ENSG00000035720	STAP1	protein_coding	Q9ULZ2	0.796576	NA	Other
ENSG00000035862	TIMP2	protein_coding	P16035	-0.903932	0.00112769	Other
ENSG00000035928	RFC1	protein_coding	P35251	-0.0394269	0.87802	Other
ENSG00000036054	TBC1D23	protein_coding	Q9NUY8	-0.0942073	0.703992	Other
ENSG00000036257	CUL3	protein_coding	Q13618	-0.455161	0.015893	Other
ENSG00000036448	MYOM2	protein_coding	P54296	0.147339	NA	Other
ENSG00000036473	OTC	protein_coding	P00480	NA	NA	Other
ENSG00000036530	CYP46A1	protein_coding	Q9Y6A2	1.02598	NA	Other
ENSG00000036549	ZZZ3	protein_coding	Q8IYH5	-0.371306	0.0173182	Other
ENSG00000036565	SLC18A1	protein_coding	P54219	-0.166836	NA	Other
ENSG00000036672	USP2	protein_coding	O75604	-0.632203	0.00827197	Other
ENSG00000036828	CASR.1	protein_coding	#N/A	NA	NA	Other
ENSG00000037042	TUBG2	protein_coding	Q9NRH3	0.140938	0.807595	Other
ENSG00000037241	RPL26L1	protein_coding	Q9UNX3	-0.288772	0.249677	Other
ENSG00000037280	FLT4	protein_coding	P35916	-0.0702487	0.830843	Other
ENSG00000037474	NSUN2	protein_coding	Q08J23	-0.336419	0.00812465	Other
ENSG00000037637	FBXO42	protein_coding	Q6P3S6	0.22715	0.237664	Other
ENSG00000037749	MFAP3	protein_coding	P55082	-0.334271	0.100507	Other
ENSG00000037757	MRI1	protein_coding	Q9BV20	0.0865553	0.698484	Other
ENSG00000037897	METTL1	protein_coding	Q9UBP6	-0.360292	0.102331	Other
ENSG00000037965	HOXC8	protein_coding	P31273	-1.14082	0.0234577	Other
ENSG00000038002	AGA	protein_coding	P20933	0.151833	0.415965	Other
ENSG00000038210	PI4K2B	protein_coding	Q8TCG2	0.270204	0.592291	Other
ENSG00000038219	BOD1L1	protein_coding	Q8NFC6	-0.283281	0.108873	Other
ENSG00000038274	MAT2B	protein_coding	Q9NZL9	-0.30376	0.119772	Other
ENSG00000038295	TLL1	protein_coding	O43897	0.318711	0.601723	Other
ENSG00000038358	EDC4	protein_coding	Q6P2E9	-0.253757	0.13888	Other
ENSG00000038382	TRIO	protein_coding	O75962	-0.0344672	0.893928	Other
ENSG00000038427	VCAN	protein_coding	P13611	-0.861517	6.50268e-11	Basal-specific
ENSG00000038532	CLEC16A	protein_coding	Q2KHT3	-0.260647	0.215414	Other
ENSG00000038945	MSR1	protein_coding	P21757	NA	NA	Other
ENSG00000039068	CDH1	protein_coding	P12830	-1.09311	7.24083e-05	Basal-specific
ENSG00000039123	SKIV2L2	protein_coding	#N/A	-0.485519	0.000717874	Other
ENSG00000039139	DNAH5	protein_coding	Q8TE73	0.509674	NA	Other
ENSG00000039319	ZFYVE16	protein_coding	Q7Z3T8	-0.401738	0.0191981	Other
ENSG00000039523	FAM65A	protein_coding	#N/A	1.12852	NA	Other
ENSG00000039537	C6	protein_coding	P13671	NA	NA	Other
ENSG00000039560	RAI14	protein_coding	Q9P0K7	-0.616557	1.64729e-05	Other
ENSG00000039600	SOX30	protein_coding	O94993	0.457002	NA	Other
ENSG00000039650	PNKP	protein_coding	Q96T60	0.319665	0.141896	Other
ENSG00000039987	BEST2	protein_coding	Q8NFU1	0.603355	0.582211	Other
ENSG00000040199	PHLPP2	protein_coding	Q6ZVD8	0.0663171	0.819874	Other
ENSG00000040275	SPDL1	protein_coding	Q96EA4	-0.37023	0.0111907	Other
ENSG00000040341	STAU2	protein_coding	Q9NUL3	-0.695928	0.000119552	Other
ENSG00000040487	PQLC2	protein_coding	Q6ZP29	0.520028	0.00981541	Other
ENSG00000040531	CTNS	protein_coding	O60931	0.0298276	0.919625	Other
ENSG00000040608	RTN4R	protein_coding	Q9BZR6	-0.475692	0.403829	Other
ENSG00000040633	PHF23	protein_coding	Q9BUL5	0.0291898	0.921913	Other
ENSG00000040731	CDH10	protein_coding	Q9Y6N8	-0.4928	0.654652	Other
ENSG00000040933	INPP4A	protein_coding	Q96PE3	0.462838	0.00938242	Other
ENSG00000041353	RAB27B	protein_coding	O00194	-3.19032	NA	Other
ENSG00000041357	PSMA4	protein_coding	P25789	0.0199646	0.960056	Other
ENSG00000041515	MYO16	protein_coding	Q9Y6X6	NA	NA	Other
ENSG00000041802	LSG1	protein_coding	Q9H089	-0.275747	0.0894673	Other
ENSG00000041880	PARP3	protein_coding	Q9Y6F1	0.913584	0.00130194	Other
ENSG00000041982	TNC	protein_coding	P24821	-0.127651	0.774698	Basal-specific
ENSG00000041988	THAP3	protein_coding	Q8WTV1	-0.0436153	0.922114	Other
ENSG00000042062	FAM65C	protein_coding	#N/A	0.429107	NA	Other
ENSG00000042088	TDP1	protein_coding	Q9NUW8	-0.249701	0.232498	Other
ENSG00000042286	AIFM2	protein_coding	Q9BRQ8	0.132635	0.717854	Other
ENSG00000042304	C2orf83	protein_coding	Q53S99	NA	NA	Other
ENSG00000042317	SPATA7	protein_coding	Q9P0W8	-0.261643	0.540372	Other
ENSG00000042429	MED17	protein_coding	A0A1W2PRB8	-0.148783	0.632959	Other
ENSG00000042445	RETSAT	protein_coding	Q6NUM9	0.332648	0.0902698	Other
ENSG00000042493	CAPG	protein_coding	P40121	0.456279	0.128892	Other
ENSG00000042753	AP2S1	protein_coding	P53680	0.208262	0.305384	Other
ENSG00000042781	USH2A	protein_coding	O75445	-0.398648	NA	Other
ENSG00000042813	ZPBP	protein_coding	Q9BS86	NA	NA	Other
ENSG00000042832	TG	protein_coding	P01266	3.80605	NA	Other
ENSG00000042980	ADAM28	protein_coding	Q9UKQ2	NA	NA	Other
ENSG00000043039	BARX2	protein_coding	Q9UMQ3	0.186195	0.719629	Other
ENSG00000043093	DCUN1D1	protein_coding	Q96GG9	-0.591304	0.000365855	Other
ENSG00000043143	JADE2	protein_coding	Q9NQC1	-0.365211	0.295001	Other
ENSG00000043355	ZIC2	protein_coding	O95409	-0.261482	0.0846441	Other
ENSG00000043462	LCP2	protein_coding	Q13094	-4.09218	NA	Other
ENSG00000043514	TRIT1	protein_coding	Q9H3H1	-0.26399	0.268018	Other
ENSG00000043591	ADRB1	protein_coding	P08588	-0.890085	NA	Other
ENSG00000044012	GUCA2B	protein_coding	Q16661	-0.166836	NA	Other
ENSG00000044090	CUL7	protein_coding	Q14999	0.297041	0.231907	Other
ENSG00000044115	CTNNA1	protein_coding	P35221	-0.352937	0.0182874	Other
ENSG00000044446	PHKA2	protein_coding	P46019	-0.105928	0.668068	Other
ENSG00000044459	CNTLN	protein_coding	Q9NXG0	-0.253116	0.502008	Other
ENSG00000044524	EPHA3	protein_coding	P29320	0.00107763	0.998311	Other
ENSG00000044574	HSPA5	protein_coding	P11021	2.6696	5.37241e-93	Common
ENSG00000046604	DSG2	protein_coding	Q14126	-0.42621	0.00124655	Basal-specific
ENSG00000046647	GEMIN8	protein_coding	Q9NWZ8	-0.287947	0.306012	Other
ENSG00000046651	OFD1	protein_coding	O75665	-0.280646	0.328886	Other
ENSG00000046653	GPM6B	protein_coding	Q13491	-0.656174	0.0383565	Other
ENSG00000046774	MAGEC2	protein_coding	Q9UBF1	3.20568	NA	Other
ENSG00000046889	PREX2	protein_coding	Q70Z35	-0.494893	0.225573	Other
ENSG00000047056	WDR37	protein_coding	Q9Y2I8	0.811153	6.56538e-07	Other
ENSG00000047188	YTHDC2	protein_coding	Q9H6S0	-0.612677	1.95678e-06	Other
ENSG00000047230	CTPS2	protein_coding	Q9NRF8	-0.508303	0.00287403	Other
ENSG00000047249	ATP6V1H	protein_coding	Q9UI12	-0.294884	0.0476878	Other
ENSG00000047315	POLR2B	protein_coding	P30876	-0.490039	0.0508082	Other
ENSG00000047346	FAM214A	protein_coding	Q32MH5	0.519446	0.13991	Other
ENSG00000047365	ARAP2	protein_coding	Q8WZ64	-0.689194	0.10786	Other
ENSG00000047410	TPR	protein_coding	P12270	-0.485223	0.00303942	Other
ENSG00000047457	CP	protein_coding	P00450	-0.134047	NA	Other
ENSG00000047578	KIAA0556	protein_coding	O60303	-0.15028	0.599299	Other
ENSG00000047579	DTNBP1	protein_coding	Q96EV8	0.257389	0.195281	Other
ENSG00000047597	XK	protein_coding	P51811	0.786966	0.104319	Other
ENSG00000047617	ANO2	protein_coding	Q9NQ90	1.30981	NA	Other
ENSG00000047621	C12orf4	protein_coding	Q9NQ89	0.0568278	0.799737	Other
ENSG00000047634	SCML1	protein_coding	Q9UN30	0.216696	0.224056	Other
ENSG00000047644	WWC3	protein_coding	Q9ULE0	0.0408821	NA	Other
ENSG00000047648	ARHGAP6	protein_coding	O43182	2.13394	NA	Other
ENSG00000047662	FAM184B	protein_coding	#N/A	0.439189	0.616766	Other
ENSG00000047849	MAP4	protein_coding	P27816	-0.309086	0.0129136	Other
ENSG00000047932	GOPC	protein_coding	Q9HD26	0.033123	0.888458	Other
ENSG00000047936	ROS1	protein_coding	P08922	0.844766	NA	Other
ENSG00000048028	USP28	protein_coding	Q96RU2	-0.402461	0.0174248	Other
ENSG00000048052	HDAC9	protein_coding	Q9UKV0	-1.27222	NA	Other
ENSG00000048140	TSPAN17	protein_coding	Q96FV3	0.479802	0.0370952	Other
ENSG00000048162	NOP16	protein_coding	Q9Y3C1	-0.132422	0.553753	Other
ENSG00000048342	CC2D2A	protein_coding	Q9P2K1	-0.59438	0.0438498	Other
ENSG00000048392	RRM2B	protein_coding	Q7LG56	0.0308344	0.925163	Other
ENSG00000048405	ZNF800	protein_coding	Q2TB10	0.2897	0.243964	Other
ENSG00000048462	TNFRSF17	protein_coding	Q02223	-0.436021	NA	Other
ENSG00000048471	SNX29	protein_coding	Q8TEQ0	0.0453311	0.896892	Other
ENSG00000048540	LMO3	protein_coding	Q8TAP4	2.69145	NA	Other
ENSG00000048544	MRPS10	protein_coding	P82664	-0.41697	0.121545	Other
ENSG00000048545	GUCA1A	protein_coding	P43080	-1.11609	NA	Other
ENSG00000048649	RSF1	protein_coding	Q96T23	-0.43228	0.0102759	Other
ENSG00000048707	VPS13D	protein_coding	Q5THJ4	-0.0352644	0.892901	Other
ENSG00000048740	CELF2	protein_coding	O95319	-0.322807	0.137117	Other
ENSG00000048828	FAM120A	protein_coding	Q9NZB2	-0.389351	0.007997	Other
ENSG00000048991	R3HDM1	protein_coding	Q15032	-0.157152	0.545825	Other
ENSG00000049089	COL9A2	protein_coding	Q14055	1.48404	NA	Other
ENSG00000049130	KITLG	protein_coding	P21583	0.057335	0.894519	Other
ENSG00000049167	ERCC8	protein_coding	Q13216	0.21097	0.53203	Other
ENSG00000049192	ADAMTS6	protein_coding	Q9UKP5	-0.0537076	0.951491	Other
ENSG00000049239	H6PD	protein_coding	O95479	0.459975	0.0723745	Other
ENSG00000049245	VAMP3	protein_coding	Q15836	-0.296714	0.0782339	Other
ENSG00000049246	PER3	protein_coding	P56645	-0.232505	0.793894	Other
ENSG00000049247	UTS2	protein_coding	O95399	0.582842	NA	Other
ENSG00000049249	TNFRSF9	protein_coding	Q07011	1.13372	0.138759	Other
ENSG00000049283	EPN3	protein_coding	Q9H201	0.269587	NA	Other
ENSG00000049323	LTBP1	protein_coding	Q14766	-0.18357	0.4163	Common
ENSG00000049449	RCN1	protein_coding	Q15293	0.303778	0.0574968	Basal-specific
ENSG00000049540	ELN	protein_coding	P15502	3.274	NA	Other
ENSG00000049541	RFC2	protein_coding	P35250	-0.140297	0.566808	Other
ENSG00000049618	ARID1B	protein_coding	Q8NFD5	-0.221896	0.210113	Other
ENSG00000049656	CLPTM1L	protein_coding	Q96KA5	1.03303	0.000602729	Other
ENSG00000049759	NEDD4L	protein_coding	Q96PU5	-0.22182	0.442137	Other
ENSG00000049768	FOXP3	protein_coding	Q9BZS1	1.15021	0.333422	Other
ENSG00000049769	PPP1R3F	protein_coding	Q6ZSY5	0.865084	0.024336	Other
ENSG00000049860	HEXB	protein_coding	P07686	-0.407907	0.0367073	Other
ENSG00000049883	PTCD2	protein_coding	Q8WV60	0.161059	0.585142	Other
ENSG00000050030	KIAA2022	protein_coding	#N/A	-0.775061	0.100582	Other
ENSG00000050130	JKAMP	protein_coding	Q9P055	-0.114949	0.651388	Other
ENSG00000050165	DKK3	protein_coding	Q9UBP4	-0.599308	0.496732	Other
ENSG00000050327	ARHGEF5	protein_coding	Q12774	NA	NA	Other
ENSG00000050344	NFE2L3	protein_coding	Q9Y4A8	-0.349039	0.438221	Other
ENSG00000050393	MCUR1	protein_coding	Q96AQ8	0.518184	0.00535622	Other
ENSG00000050405	LIMA1	protein_coding	Q9UHB6	0.49389	0.00240691	Other
ENSG00000050426	LETMD1	protein_coding	Q6P1Q0	0.443605	0.00905367	Other
ENSG00000050438	SLC4A8	protein_coding	Q2Y0W8	-1.12644	0.109019	Other
ENSG00000050555	LAMC3	protein_coding	Q9Y6N6	-0.0818569	0.896942	Other
ENSG00000050628	PTGER3	protein_coding	P43115	0.246714	NA	Other
ENSG00000050730	TNIP3	protein_coding	Q96KP6	0.795952	NA	Other
ENSG00000050748	MAPK9	protein_coding	P45984	-0.222851	0.298246	Other
ENSG00000050767	COL23A1	protein_coding	Q86Y22	0.796434	0.445641	Other
ENSG00000050820	BCAR1	protein_coding	P56945	-0.0993925	0.629575	Other
ENSG00000051009	FAM160A2	protein_coding	Q8N612	0.388495	0.0545416	Other
ENSG00000051108	HERPUD1	protein_coding	Q15011	2.30638	6.8169e-66	Other
ENSG00000051128	HOMER3	protein_coding	Q9NSC5	0.350682	0.577837	Other
ENSG00000051180	RAD51	protein_coding	Q06609	0.0533536	0.842778	Other
[truncated: 57,301 more rows]

## Sheet: ERM up-translation
Ensemble Gene ID	Gene name	Gene type	UniprotID	Log2 (ERM Enrich Tg/Basal)	P-adj (ERM Enrich Tg/Basal)	Dynamic type
[truncated: 99 more rows]

[truncated: 2 more sheets: ERM down-translation, Column definition]
